# Supplementary material for: Direct remote δ-C(sp2)–H olefination of β-aryl-substituted aliphatic aldehydes via palladium/enamine co-catalysis
Source: Royal Society of Chemistry journal article supplement (doi:10.1039/d0qo00911c), 2020-01-01
Supplement: d0qo00911c1.pdf [file d0qo00911c1.pdf]

**Direct Remote  $\delta$ -C(sp<sup>2</sup>)-H olefination of  $\beta$ -Aryl Substituted Aliphatic Aldehydes via  
Palladium/Enamine Co-catalysis**

**Richa, Rajesh Kumar, Xiaofeng Zhang, Weiping Su\***

*State Key Laboratory of Structural Chemistry, Fujian Institute of Research on the  
Structure of Matter, Chinese Academy of Sciences, Fuzhou, Fujian 350002 (PR  
China)*

**Table of Contents**

|                                                                                                                                                                                 |         |
|---------------------------------------------------------------------------------------------------------------------------------------------------------------------------------|---------|
| 1. General information.....                                                                                                                                                     | S2      |
| 2. Experimental Section                                                                                                                                                         |         |
| 2.1 Preparation and characterization of aldehydes used as starting materials.....                                                                                               | S3-S20  |
| 2.2 Preparation and characterization of acrylates used as starting materials.....                                                                                               | S20-S22 |
| 2.3 Preparation and characterization of starting materials derived from natural products and drug<br>molecules.....                                                             | S22-S35 |
| 2.4 Selected results from optimization studies of the olefination of dual remote C-H bonds of $\beta$ -<br>phenyl propionaldehyde <b>1a</b> with ethyl acrylate <b>2a</b> ..... | S36     |
| 2.5 General procedure for olefination of dual remote C-H bonds.....                                                                                                             | S37     |
| 2.6 Experimental data for evaluating substrate scope for dual olefination of remote C-H bonds<br>.....                                                                          | S37-S68 |
| 2.7 General procedure for late-stage diversification of natural product and drug motifs.....                                                                                    | S69     |
| 2.8 Experimental data of olefinated natural products and drug molecules .....                                                                                                   | S69-S75 |
| 2.9 Synthetic procedures and experimental data for post-synthetic modification of <b>3a</b> ...                                                                                 | S75-S79 |
| 2.10 Synthetic procedure for the scaled up reaction for synthesis of <b>3a</b> .....                                                                                            | S79-S80 |
| 2.11 Reaction with recovered HFIP for synthesis of <b>3a</b> .....                                                                                                              | S80     |
| 2.12 Synthetic procedure for synthesis of <b>1a-D<sub>5</sub></b> and deuterated amine ( <b>A</b> ) .....                                                                       | S81-S83 |
| 2.13 General procedure for H/D Exchange experiments with aldehyde <b>1a</b> .....                                                                                               | S83-S86 |
| 2.14 Experiments for measurement of KIE values with <b>1a-D<sub>5</sub></b> .....                                                                                               | S87-S92 |
| 2.15 Intermolecular competitive experiments.....                                                                                                                                | S93-S96 |
| 2.16 Control experiments.....                                                                                                                                                   | S96-S98 |

|      |                                                                                                                  |           |
|------|------------------------------------------------------------------------------------------------------------------|-----------|
| 2.17 | Enamine formation, intermolecular competitive, H-binding interaction and amine-enamine exchange experiments..... | S98-S112  |
| 2.18 | General depiction regarding effect of steric hinderance on olefin migratory insertion step.....                  | S113      |
| 3.   | <sup>1</sup> H, <sup>13</sup> C and <sup>19</sup> F NMR spectra of synthesized starting material.....            | S114-S231 |
| 4.   | <sup>1</sup> H, <sup>13</sup> C and <sup>19</sup> F NMR spectra of all olefinated compounds.....                 | S232-S402 |
| 5.   | Crystallographic data of compound <b>3d</b> .....                                                                | S403-S404 |
| 6.   | References.....                                                                                                  | S405-S407 |

## General Information

Unless otherwise noted, all commercially available reagents were purchased from commercial suppliers (Alfa Aesar, Acros, TCI, Innochem, J&K Chemical Co., Accela, Aladdin, Laajoo, 3A chemical, and Sinopharm), and were used directly without further purifications. Hexafluoro-2-propanol (HFIP) was purchased from Chem Greatwall and used as received. HOAc was distilled from P<sub>2</sub>O<sub>5</sub>. Unless otherwise noted, reactions for C-H functionalization were run under oxygen atmosphere and for synthesis of starting material under nitrogen atmosphere. The reaction vessels used for C-H functionalization were 37 mL pressure tube of Synthware. Purification of products was performed with Sepaflash column chromatography by Santai Technology or preparative thin layer chromatography. <sup>1</sup>H NMR (400 MHz), <sup>13</sup>C NMR (100 MHz), <sup>19</sup>F NMR (377 MHz) spectra were recorded in CDCl<sub>3</sub> or d<sub>6</sub>-Acetone (C<sub>3</sub>D<sub>6</sub>O) solutions using a Bruker AVANCE 400 spectrometer. Calibration was done using tetramethylsilane 0 ppm for <sup>1</sup>H NMR and 77.0 ppm for <sup>13</sup>C NMR, acetone (2.05 ppm for <sup>1</sup>H NMR and 206.7, 29.9 ppm for <sup>13</sup>C NMR). The following abbreviations were used to explain multiplicities: s = singlet, d = doublet, t = triplet, q = quartet, quint = quintet, m = multiplet, br = broad, dd = doublet of doublets and td = triplet of doublets. Coupling constants, *J*, were reported in Hertz unit (Hz) HRMS were performed by the Shanghai Mass Spectrometry Center in Shanghai Institute of Organic Chemistry, Chinese Academic of Sciences (Instrument: Thermo Fisher Scientific LTQ FT Ultra, Operation Mode: ESI positive ion mode). Melting points were measured with SWG X-4 digital point apparatus and uncorrected. IR spectra were recorded using Bruker-Vertex 70 instrument.

**Preparation and characterization of the aldehydes used as starting material (1b-1i, 1k-1m, 1o-1s, 1u-1v and 1aa)<sup>1a</sup>**

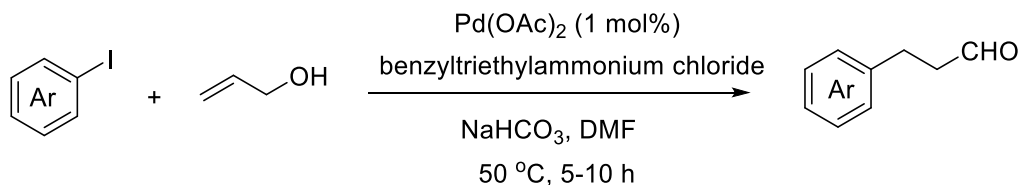

**General procedure (A):** In a nitrogen-filled glove box, a 100 mL Schlenk tube equipped with a stir bar was charged with substituted iodobenzene (5.0 mmol), Pd(OAc)<sub>2</sub> (0.0113g, 0.1 mmol, 1 mol%), benzyltriethylammonium chloride (1.1389g, 1.0 equiv) and NaHCO<sub>3</sub> (1.050g, 2.5 equiv.). The tube was fitted with a rubber septum and moved out of the glove box. Then allyl alcohol (0.4356g, 1.5 equiv.) and DMF (20.0 mL) were added in turn to the Schlenk tube through the rubber septum using syringes, and then the septum was replaced with a Teflon screwcap under nitrogen flow. The reaction mixture was stirred at 50 °C for 5-10 h. Upon cooling to room temperature, the reaction mixture was filtrated through a pad of silica gel, washed with 50 mL of ethyl acetate and washed twice with water (20.0 mL). The organic layer was dried over anhydrous Na<sub>2</sub>SO<sub>4</sub> and concentrated under reduced pressure. The residue was purified by flash chromatography on silica gel to provide the corresponding product in 50-80 % yields.

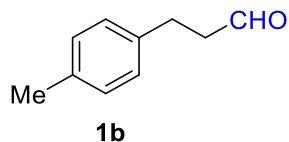

**3-(p-tolyl)propanal (1b)<sup>1a</sup>:** This substrate was prepared using the *general procedure (A)*. The Schlenk tube was charged with 4-iodotoluene (1.0902 g, 5 mmol), Pd(OAc)<sub>2</sub> (0.0113 g, 0.1 mmol, 1 mol%), benzyltriethylammonium chloride (1.1389 g, 1.0 equiv.), NaHCO<sub>3</sub> (1.050g, 2.5 equiv.) and allyl alcohol (0.4356 g, 1.5 equiv.) in DMF (20.0 mL) and the reaction mixture was stirred at 50 °C for 5 h. After concentration and purification by flash chromatography on silica gel (Eluent: 2% EtOAc /98% hexane), the product **1b** was obtained as colorless liquid. <sup>1</sup>H NMR (400 MHz, acetone-d<sub>6</sub>): δ 9.78 (s, 1H), 7.15-7.09 (m, 4H), 2.91 (t, *J* = 7.6 Hz, 2H), 2.77 (t, *J* = 7.5 Hz, 2H),

2.29 (s, 3H);  $^{13}\text{C}$  NMR (100 MHz, acetone- $d_6$ ):  $\delta$  201.3, 137.9, 135.2, 129.0, 128.2, 45.0, 27.4 and 20.1

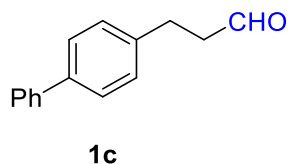

**3-([1,1'-biphenyl]-4-yl)propanal (1c)<sup>1a</sup>:** This substrate was prepared using the *general procedure (A)*. The Schlenk tube was charged with 4-iodo-1,1'-biphenyl (1.4005 g, 5 mmol), Pd(OAc)<sub>2</sub> (0.0113 g, 0.1 mmol, 1 mol%), benzyltriethylammonium chloride (1.1389 g, 1.0 equiv.), NaHCO<sub>3</sub> (1.050 g, 2.5 equiv.) and allyl alcohol (0.4356 g, 1.5 equiv.) in DMF (20.0 mL) and the reaction mixture was stirred at 50 °C for 5 h. After concentration and purification by flash chromatography on silica gel (Eluent: 2% EtOAc /98% hexane), the product **1c** was obtained as milky white oil.  $^1\text{H}$  NMR (400 MHz, CDCl<sub>3</sub>):  $\delta$  9.88 (s, 1H), 7.61 (d,  $J$  = 7.4 Hz, 2H), 7.57 (d,  $J$  = 8.2 Hz, 2H), 7.48 (t,  $J$  = 7.8 Hz, 2H), 7.38 (t,  $J$  = 7.2 Hz, 1H), 7.31-7.29 (m, 2H), 3.05 (t,  $J$  = 7.5 Hz, 2H), 2.88 (t,  $J$  = 7.5 Hz, 2H);  $^{13}\text{C}$  NMR (100 MHz, CDCl<sub>3</sub>):  $\delta$  201.6, 140.9, 139.4, 139.3, 128.8, 128.7, 127.4, 127.2, 127.0, 45.3 and 27.4

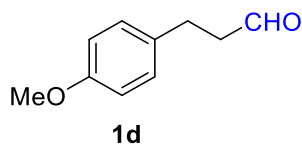

**3-(4-methoxyphenyl)propanal (1d)<sup>1a</sup>:** This substrate was prepared using the *general procedure (A)*. The Schlenk tube was charged with 1-iodo-4-methoxybenzene (1.1702 g, 5 mmol), Pd(OAc)<sub>2</sub> (0.0113 g, 0.1 mmol, 1 mol%), benzyltriethylammonium chloride (1.1389 g, 1.0 equiv.), NaHCO<sub>3</sub> (1.050 g, 2.5 equiv.) and allyl alcohol (0.4356 g, 1.5 equiv.) in DMF (20.0 mL) and the reaction mixture was stirred at 50 °C for 5 h. After concentration and purification by flash chromatography on silica gel (Eluent: 3% EtOAc /97% hexane), the product **1d** was obtained as colorless liquid.  $^1\text{H}$  NMR (400 MHz, CDCl<sub>3</sub>):  $\delta$  9.77 (s, 1H), 7.11 (d,  $J$  = 8.6 Hz, 2H), 6.83 (d,  $J$  = 8.6 Hz, 2H), 3.76 (s, 3H), 2.90 (t,  $J$  = 7.5 Hz, 2H), 2.74 (t,  $J$  = 7.5 Hz, 2H);  $^{13}\text{C}$  NMR (100 MHz, CDCl<sub>3</sub>):  $\delta$  201.8, 158.1, 132.4, 129.3, 113.9, 55.2, 45.5 and 27.3

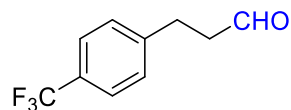

**1e**

**3-(4-(trifluoromethyl)phenyl)propanal (1e)<sup>1a</sup>:** This substrate was prepared using the *general procedure (A)*. The Schlenk tube was charged with 1-iodo-4-(trifluoromethyl)benzene (1.3600 g, 5 mmol), Pd(OAc)<sub>2</sub> (0.0113 g, 0.1 mmol, 1 mol%), benzyltriethylammonium chloride (1.1389 g, 1.0 equiv.), NaHCO<sub>3</sub> (1.050 g, 2.5 equiv.) and allyl alcohol (0.4356 g, 1.5 equiv.) in DMF (20.0 mL) and the reaction mixture was stirred at 50°C for 5 h. After concentration and purification by flash chromatography on silica gel (Eluent: 2% EtOAc /98% hexane), the product **1e** was obtained as colorless viscous oil. <sup>1</sup>H NMR (400 MHz, Acetone-d<sub>6</sub>): δ 9.80 (s, 1H), 7.64 (*J* = 8.1 Hz, 2H), 7.50 (d, *J* = 8.1 Hz, 2H), 3.04 (t, *J* = 7.4 Hz, 2H), 2.88 (t, *J* = 7.4 Hz, 2H); <sup>13</sup>C NMR (100 MHz, Acetone-d<sub>6</sub>): δ 200.7, 145.9, 129.1, 127.9 (d, *J*<sub>C-F</sub> = 32.4 Hz), 125.9 (d, *J*<sub>C-F</sub> = 271.3 Hz), 125.2 (q, *J*<sub>C-F</sub> = 3.8 Hz), 44.4 and 27.5; <sup>19</sup>F NMR (377 MHz, Acetone-d<sub>6</sub>): δ -62.8

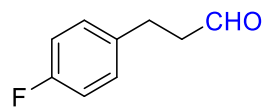

**1f**

**3-(4-fluorophenyl)propanal (1f)<sup>1a</sup>:** This substrate was prepared using the *general procedure (A)*. The Schlenk tube was charged with 1-fluoro-4-iodobenzene (1.1100 g, 5 mmol), Pd(OAc)<sub>2</sub> (0.0113 g, 0.1 mmol, 1 mol%), benzyltriethylammonium chloride (1.1389 g, 1.0 equiv.), NaHCO<sub>3</sub> (1.050 g, 2.5 equiv.) and allyl alcohol (0.4356 g, 1.5 equiv.) in DMF (20.0 mL) and the reaction mixture was stirred at 50 °C for 5 h. After concentration and purification by flash chromatography on silica gel (Eluent: 2% EtOAc /98% hexane), the product **1f** was obtained as colorless viscous oil. <sup>1</sup>H NMR (400 MHz, Acetone-d<sub>6</sub>): δ 9.77 (s, 1H), 7.30-7.25 (m, 2H), 7.06 (d, *J* = 8.7 Hz, 2H), 2.94 (t, *J* = 7.5 Hz, 2H), 2.80 (t, *J* = 7.5 Hz, 2H); <sup>13</sup>C NMR (100 MHz, Acetone-d<sub>6</sub>): δ 201.1, 162.5 (d, *J*<sub>C-F</sub> = 242.6 Hz), 137.1 (d, *J*<sub>C-F</sub> = 3.1 Hz), 130.1 (d, *J*<sub>C-F</sub> = 7.8 Hz), 115.0 (d, *J*<sub>C-F</sub> = 21.2 Hz), 44.9, 26.9; <sup>19</sup>F NMR (377 MHz, Acetone-d<sub>6</sub>): δ -118.8

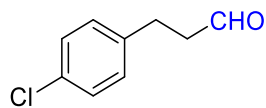

**1g**

**3-(4-chlorophenyl)propanal (1g)<sup>1a</sup>:** This substrate was prepared using the *general procedure (A)*. The Schlenk tube was charged with 1-chloro-4-iodobenzene (1.1923 g, 5 mmol), Pd(OAc)<sub>2</sub> (0.0113 g, 0.1 mmol, 1 mol%), benzyltriethylammonium chloride (1.1389 g, 1.0 equiv.), NaHCO<sub>3</sub> (1.050 g, 2.5 equiv.) and allyl alcohol (0.4356 g, 1.5 equiv.) in DMF (20.0 mL) and the reaction mixture was stirred at 50 °C for 5 h. After concentration and purification by flash chromatography on silica gel (Eluent: 2% EtOAc /98% hexane), the product **1g** was obtained as colorless viscous oil. <sup>1</sup>H NMR (400 MHz, CDCl<sub>3</sub>): δ 9.77 (s, 1H), 7.25 (*J* = 8.4 Hz, 2H), 7.13 (d, *J* = 8.4 Hz, 2H), 2.92 (t, *J* = 7.5 Hz, 2H), 2.77 (t, *J* = 7.5 Hz, 2H); <sup>13</sup>C NMR (100 MHz, CDCl<sub>3</sub>): δ 201.1, 138.9, 131.9, 129.9, 128.6, 45.1 and 27.4

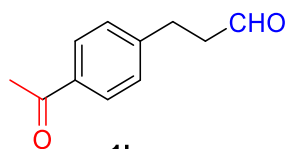

**1h**

**3-(4-acetylphenyl)propanal (1h)<sup>1a</sup>:** This substrate was prepared using the *general procedure (A)*. The Schlenk tube was charged with 1-(4-iodophenyl)ethan-1-one (1.2302 g, 5 mmol), Pd(OAc)<sub>2</sub> (0.0113 g, 0.1 mmol, 1 mol%), benzyltriethylammonium chloride (1.1389 g, 1.0 equiv.), NaHCO<sub>3</sub> (1.050 g, 2.5 equiv.) and allyl alcohol (0.4356 g, 1.5 equiv.) in DMF (20.0 mL) and the reaction mixture was stirred at 50 °C for 10 h. After concentration and purification by flash chromatography on silica gel (Eluent: 5% EtOAc /95% hexane), the product **1h** was obtained as colorless viscous oil. <sup>1</sup>H NMR (400 MHz, CDCl<sub>3</sub>): δ 9.81 (s, 1H), 7.90 (*J* = 8.5 Hz, 2H), 7.30 (d, *J* = 8.5 Hz, 2H), 3.02 (t, *J* = 7.5 Hz, 2H), 2.84 (t, *J* = 7.5 Hz, 2H), 2.57 (s, 3H); <sup>13</sup>C NMR (100 MHz, CDCl<sub>3</sub>): δ 200.9, 197.7, 146.2, 135.3, 128.7, 128.6, 44.7, 27.9 and 26.5

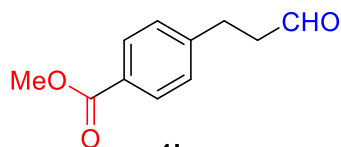

**1i**

**methyl 4-(3-oxopropyl)benzoate (1i)<sup>1a</sup>:** This substrate was prepared using the *general procedure* (A). The Schlenk tube was charged with methyl 4-iodobenzoate (1.3102 g, 5 mmol), Pd(OAc)<sub>2</sub> (0.0113 g, 0.1 mmol, 1 mol%), benzyltriethylammonium chloride (1.1389 g, 1.0 equiv.), NaHCO<sub>3</sub> (1.050 g, 2.5 equiv.) and allyl alcohol (0.4356 g, 1.5 equiv.) in DMF (20.0 mL) and the reaction mixture was stirred at 50 °C for 10 h. After concentration and purification by flash chromatography on silica gel (Eluent: 8% EtOAc /92% hexane), the product **1i** was obtained as colorless viscous oil. <sup>1</sup>H NMR (400 MHz, CDCl<sub>3</sub>): δ 9.81 (s, 1H), 7.97 (*J* = 8.3 Hz, 2H), 7.27 (d, *J* = 8.5 Hz, 2H), 3.89 (s, 3H), 3.02 (t, *J* = 7.5 Hz, 2H), 2.83 (t, *J* = 7.5 Hz, 2H); <sup>13</sup>C NMR (100 MHz, CDCl<sub>3</sub>): δ 200.9, 166.9, 145.9, 129.9, 128.4, 128.3, 52.0, 44.8 and 27.9

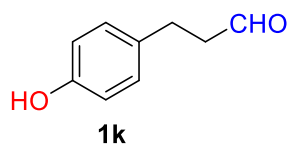

**3-(4-hydroxyphenyl)propanal (1k)<sup>1a</sup>:** This substrate was prepared using the *general procedure* (A). The Schlenk tube was charged with 4-iodophenol (1.1000 g, 5 mmol), Pd(OAc)<sub>2</sub> (0.0113 g, 0.1 mmol, 1 mol%), benzyltriethylammonium chloride (1.1389 g, 1.0 equiv.), NaHCO<sub>3</sub> (1.050 g, 2.5 equiv.) and allyl alcohol (0.4356 g, 1.5 equiv.) in DMF (20.0 mL) and the reaction mixture was stirred at 50 °C for 5 h. After concentration and purification by flash chromatography on silica gel (Eluent: 2% EtOAc /98% hexane), the product **1k** was obtained as pale-yellow liquid. <sup>1</sup>H NMR (400 MHz, CDCl<sub>3</sub>): δ 9.77 (s, 1H), 7.03 (*J* = 8.5 Hz, 2H), 6.77 (d, *J* = 8.5 Hz, 2H), 6.18 (br, 1H), 2.89 (t, *J* = 7.5 Hz, 2H), 2.76 (t, *J* = 7.5 Hz, 2H); <sup>13</sup>C NMR (100 MHz, CDCl<sub>3</sub>): δ 203.2, 154.2, 132.1, 129.4, 115.5, 45.5 and 27.3

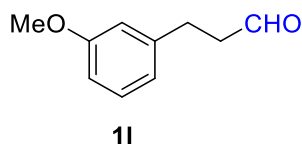

**3-(3-methoxyphenyl)propanal (1l)<sup>1a</sup>:** This substrate was prepared using the *general procedure* (A). The Schlenk tube was charged with 3-iodoanisole (1.1702 g, 5 mmol), Pd(OAc)<sub>2</sub> (0.0113 g, 0.1 mmol, 1 mol%), benzyltriethylammonium chloride (1.1389g, 1.0 equiv.), NaHCO<sub>3</sub> (1.050 g, 2.5 equiv) and allyl alcohol (0.4356 g, 1.5 equiv.) in DMF (20.0 mL) and the reaction mixture was stirred at 50 °C for 5 h. After concentration and purification by flash chromatography on silica gel

(Eluent: (3% EtOAc /97% hexane), the product **1l** was obtained as colorless liquid.  $^1\text{H NMR}$  (400 MHz,  $\text{CDCl}_3$ ):  $\delta$  9.84 (s, 1H), 7.26 (t,  $J = 8.7$  Hz, 1H), 6.82 (m, 3H), 3.82 (s, 3H), 2.98 (t,  $J = 7.5$  Hz, 2H), 2.82 (t,  $J = 7.5$  Hz, 2H);  $^{13}\text{C NMR}$  (100 MHz,  $\text{CDCl}_3$ ):  $\delta$  201.6, 159.8, 141.9, 129.6, 120.6, 114.2, 111.5, 55.2, 45.2, 28.2

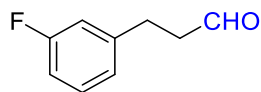

**1m**

**3-(3-fluorophenyl)propanal (1m)<sup>1a</sup>**: This substrate was prepared using the *general procedure* (A). The Schlenk tube was charged with 1-fluoro-3-iodobenzene (1.1100 g, 5 mmol),  $\text{Pd}(\text{OAc})_2$  (0.0113 g, 0.1 mmol, 1 mol%), benzyltriethylammonium chloride (1.1389 g, 1.0 equiv.),  $\text{NaHCO}_3$  (1.050 g, 2.5 equiv.) and allyl alcohol (0.4356 g, 1.5 equiv) in DMF (20.0 mL) and the reaction mixture was stirred at 50 °C for 5 h. After concentration and purification by flash chromatography on silica gel (Eluent: 2% EtOAc /98% hexane), the product **1m** was obtained as colorless viscous oil.  $^1\text{H NMR}$  (400 MHz,  $\text{CDCl}_3$ ):  $\delta$  9.83 (s, 1H), 7.30-7.24 (m, 1H), 7.00 (d,  $J = 7.5$  Hz, 1H), 6.98 (d,  $J = 9.4$  Hz, 2H), 2.99 (t,  $J = 7.5$  Hz, 2H), 2.82 (t,  $J = 7.5$  Hz, 2H);  $^{13}\text{C NMR}$  (100 MHz,  $\text{CDCl}_3$ ):  $\delta$  201.0, 164.1 (d,  $J_{\text{C-F}} = 245.4$  Hz), 142.9 (d,  $J_{\text{C-F}} = 7.3$  Hz), 130.1 (d,  $J_{\text{C-F}} = 8.7$  Hz), 124.0 (d,  $J_{\text{C-F}} = 2.8$  Hz), 115.3 (d,  $J_{\text{C-F}} = 21.8$  Hz), 113.3 (d,  $J_{\text{C-F}} = 20.9$  Hz), 44.9, 27.8 (d,  $J_{\text{C-F}} = 1.7$  Hz);  $^{19}\text{F NMR}$  (377 MHz,  $\text{CDCl}_3$ ):  $\delta$  -113.3

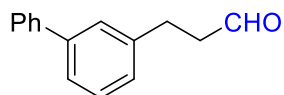

**1n**

**3-([1,1'-biphenyl]-3-yl)propanal (1n)<sup>1a</sup>**: This substrate was prepared using the *general procedure* (A). The Schlenk tube was charged with 3-iodo-1,1'-biphenyl (1.40 g, 5 mmol),  $\text{Pd}(\text{OAc})_2$  (0.0113 g, 0.1 mmol, 1 mol%), benzyltriethylammonium chloride (1.1389 g, 1.0 equiv.),  $\text{NaHCO}_3$  (1.050 g, 2.5 equiv.) and allyl alcohol (0.4356 g, 1.5 equiv) in DMF (20.0 mL) and the reaction mixture was stirred at 50 °C for 5 h. After concentration and purification by flash chromatography on silica gel (Eluent: 1% EtOAc /99% hexane), the product **1n** was obtained as colorless viscous oil.  $^1\text{H NMR}$  (400 MHz,  $\text{CDCl}_3$ ):  $\delta$  9.74 (s, 1H), 7.55 – 7.53 (m, 2H), 7.41 – 7.37 (m, 4H), 7.33-7.28 (m, 2H), 7.16 – 7.08 (m, 1H), 2.95 (t,  $J = 7.5$  Hz, 2H), 2.73 (td,  $J = 7.6, 1.3$  Hz, 2H);  $^{13}\text{C NMR}$  (100



MHz, CDCl<sub>3</sub>):  $\delta$  201.4, 141.4, 140.9, 140.8, 128.9, 128.7, 127.2, 127.1, 127.1, 127.0, 125.1, 45.1, 28.0.

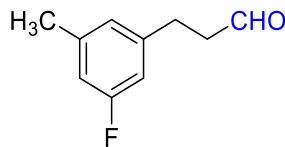

**1p**

**3-(3-fluoro-5-methylphenyl)propanal (1p)<sup>1a</sup>:** This substrate was prepared using the *general procedure (A)*. The Schlenk tube was charged with 1-fluoro-3-iodo-5-methylbenzene (1.1801 g, 5 mmol), Pd(OAc)<sub>2</sub> (0.0113 g, 0.1 mmol, 1 mol%), benzyltriethylammonium chloride (1.1389g, 1.0 equiv.), NaHCO<sub>3</sub> (1.050 g, 2.5 equiv.) and allyl alcohol (0.4356 g, 1.5 equiv.) in DMF (20.0 mL) and the reaction mixture was stirred at 50 °C for 10 h. After concentration and purification by flash chromatography on silica gel (Eluent: 2% EtOAc /98% hexane), the product **1p** was obtained as colorless viscous oil. <sup>1</sup>H NMR (400 MHz, CDCl<sub>3</sub>):  $\delta$  9.82 (s, 1H), 6.80 (s, 1H), 6.74 (t, *J* = 8.8 Hz, 2H), 2.94 (t, *J* = 7.5 Hz, 2H), 2.80 (t, *J* = 7.5 Hz, 2H), 2.33 (s, 3H); <sup>13</sup>C NMR (100 MHz, CDCl<sub>3</sub>):  $\delta$  201.2, 164.1 (d, *J*<sub>C-F</sub> = 242.6 Hz), 142.5 (d, *J*<sub>C-F</sub> = 7.8 Hz), 140.5 (d, *J*<sub>C-F</sub> = 8.1 Hz), 124.8 (d, *J*<sub>C-F</sub> = 2.4 Hz), 113.9 (d, *J*<sub>C-F</sub> = 20.7 Hz), 112.2 (d, *J*<sub>C-F</sub> = 21.3 Hz), 44.9, 27.7 and 21.3; <sup>19</sup>F NMR (377 MHz, CDCl<sub>3</sub>):  $\delta$  -114.5

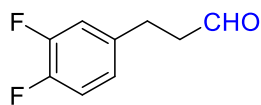

**1q**

**3-(3,4-difluorophenyl)propanal (1q)<sup>1a</sup>:** This substrate was prepared using the *general procedure (A)*. The Schlenk tube was charged with 1,2-difluoro-4-iodobenzene (1.1999 g, 5 mmol), Pd(OAc)<sub>2</sub> (0.0113 g, 0.1 mmol, 1 mol%), benzyltriethylammonium chloride (1.1389 g, 1.0 equiv.), NaHCO<sub>3</sub> (1.050 g, 2.5 equiv.) and allyl alcohol (0.4356 g, 1.5 equiv.) in DMF (20.0 mL) and the reaction mixture was stirred at 50 °C for 5 h. After concentration and purification by flash chromatography on silica gel (Eluent: 2% EtOAc /98% hexane), the product **1q** was obtained as colorless viscous oil. <sup>1</sup>H NMR (400 MHz, CDCl<sub>3</sub>):  $\delta$  9.81 (s, 1H), 7.10-6.98 (m, 2H), 6.93-6.90 (m, 1H), 2.94 (t, *J* = 7.5 Hz, 2H), 2.80 (t, *J* = 7.5 Hz, 2H); <sup>13</sup>C NMR (100 MHz, CDCl<sub>3</sub>):  $\delta$  200.7, 151.5 (dd, *J*<sub>1C-F</sub> = 247.7 Hz, *J*<sub>2C-F</sub> = 12.8 Hz), 150.2 (dd, *J*<sub>1C-F</sub> = 247.6 Hz, *J*<sub>2C-F</sub> = 12.7 Hz), 137.5 (dd, *J*<sub>1C-F</sub> = 5.6 Hz,

$J_{2C-F} = 3.9$  Hz), 124.3 (dd,  $J_{1C-F} = 6.1$  Hz,  $J_{2C-F} = 3.6$  Hz), 117.3 (dd,  $J_{1C-F} = 17.0$  Hz,  $J_{2C-F} = 5.0$  Hz), 44.9, 27.2 ;  $^{19}\text{F}$  NMR (377 MHz,  $\text{CDCl}_3$ ):  $\delta$  -137.9 (d,  $J_{C-F} = 21.6$ ), -141.6 (d,  $J_{C-F} = 21.6$ )

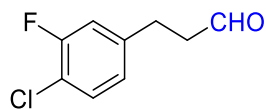

**1r**

**3-(4-chloro-3-fluorophenyl)propanal (1r)<sup>1a</sup>:** This substrate was prepared using the *general procedure (A)*. The Schlenk tube was charged with 1-chloro-2-fluoro-4-iodobenzene (0.933 g, 5 mmol),  $\text{Pd}(\text{OAc})_2$  (0.0113g, 0.1 mmol, 1 mol%), benzyltriethylammonium chloride (1.1389g, 1.0 equiv.),  $\text{NaHCO}_3$  (1.050 g, 2.5 equiv.) and allyl alcohol (0.4356 g, 1.5 equiv.) in DMF (20.0 mL) and the reaction mixture was stirred at 50 °C for 10 h. After concentration and purification by flash chromatography on silica gel (Eluent: 2% EtOAc /98% hexane), the product **1r** was obtained as colorless viscous oil.  $^1\text{H}$  NMR (400 MHz,  $\text{CDCl}_3$ ):  $\delta$  9.79 (s, 1H), 7.28 (t,  $J = 8.0$  Hz, 1H), 6.98 (dd,  $J = 10.0, 1.9$  Hz, 1H), 6.93 (d,  $J = 8.3$  Hz, 1H), 2.92 (d,  $J = 8.3$  Hz, 2H), 2.78 (d,  $J = 8.3$  Hz, 2H);  $^{13}\text{C}$  NMR (100 MHz,  $\text{CDCl}_3$ ):  $\delta$  201.5, 159.0 (d,  $J_{C-F} = 248.1$  Hz), 141.4 (d,  $J_{C-F} = 6.5$  Hz), 130.3, 124.7 (d,  $J_{C-F} = 3.6$  Hz), 118.4 (d,  $J_{C-F} = 18.4$  Hz), 116.5 (d,  $J_{C-F} = 19.6$  Hz), 44.5 and 27.1;  $^{19}\text{F}$  NMR (377 MHz,  $\text{CDCl}_3$ ):  $\delta$  -115.7

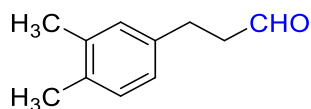

**1s**

**3-(3,4-dimethylphenyl)propanal (1s)<sup>1a</sup>:** This substrate was prepared using the *general procedure (A)*. The Schlenk tube was charged with 4-iodo-1,2-dimethylbenzene (1.1603 g, 5 mmol),  $\text{Pd}(\text{OAc})_2$  (0.0113 g, 0.1 mmol, 1 mol%), benzyltriethylammonium chloride (1.1389 g, 1.0 equiv.),  $\text{NaHCO}_3$  (1.050 g, 2.5 equiv.) and allyl alcohol (0.4356 g, 1.5 equiv.) in DMF (20.0 mL) and the reaction mixture was stirred at 50 °C for 5 h. After concentration and purification by flash chromatography on silica gel (Eluent: 2% EtOAc /98% hexane), the product **1s** was obtained as colorless viscous oil.  $^1\text{H}$  NMR (400 MHz,  $\text{CDCl}_3$ ):  $\delta$  9.78 (s, 1H), 7.05 (d,  $J = 7.8$  Hz, 1H), 6.95 (s, 1H), 6.92 (d,  $J = 7.8$  Hz, 1H), 2.89 (t,  $J = 7.5$  Hz, 2H), 2.74 (t,  $J = 7.5$  Hz, 2H), 2.22 (s, 3H), 2.21 (s, 3H);  $^{13}\text{C}$  NMR (100 MHz,  $\text{CDCl}_3$ ):  $\delta$  202.0, 137.8, 136.8, 134.5, 129.9, 129.7, 125.7, 45.5, 27.7, 19.8 and 19.4

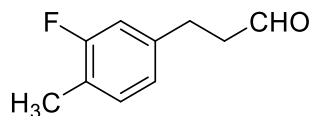

**1t**

**3-(3-fluoro-4-methylphenyl)propanal (1t)<sup>1a</sup>:** This substrate was prepared using the *general procedure (A)*. The Schlenk tube was charged with 2-fluoro-4-iodo-1-methylbenzene (1.1801 g, 5 mmol), Pd(OAc)<sub>2</sub> (0.0113 g, 0.1 mmol, 1 mol%), benzyltriethylammonium chloride (1.1389 g, 1.0 equiv), NaHCO<sub>3</sub> (1.050 g, 2.5 equiv.) and allyl alcohol (0.4356 g, 1.5 equiv.) in DMF (20.0 mL) and the reaction mixture was stirred at 50 °C for 10 h. After concentration and purification by flash chromatography on silica gel (Eluent: 3% EtOAc /97% hexane), the product **1t** was obtained as colorless viscous oil. <sup>1</sup>H NMR (400 MHz, CDCl<sub>3</sub>): δ 9.83 (s, 1H), 7.13 (t, *J* = 8.3 Hz, 1H), 6.89 (t, *J* = 7.1 Hz, 2H), 2.95 (t, *J* = 7.5 Hz, 2H), 2.80 (t, *J* = 7.5 Hz, 2H), 2.25 (s, 3H); <sup>13</sup>C NMR (100 MHz, CDCl<sub>3</sub>): δ 201.2, 162.5 (d, *J*<sub>C-F</sub> = 244.1 Hz), 140.0 (d, *J*<sub>C-F</sub> = 7.5 Hz), 131.5 (d, *J*<sub>C-F</sub> = 5.7 Hz), 123.7 (d, *J*<sub>C-F</sub> = 3.1 Hz), 122.7 (d, *J*<sub>C-F</sub> = 17.0 Hz), 114.9 (d, *J*<sub>C-F</sub> = 22.1 Hz), 45.1, 27.5 (d, *J*<sub>C-F</sub> = 1.4 Hz), 14.2 (d, *J*<sub>C-F</sub> = 3.4 Hz); <sup>19</sup>F NMR (377 MHz, CDCl<sub>3</sub>): δ -117.6

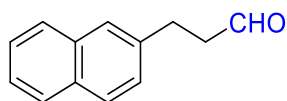

**1v**

**3-(naphthalen-2-yl)propanal (1v)<sup>1a</sup>:** This substrate was prepared using the *general procedure (A)*. The Schlenk tube was charged with 2-iodonaphthalene (1.2703 g, 5 mmol), Pd(OAc)<sub>2</sub> (0.0113 g, 0.1 mmol, 1 mol%), benzyltriethylammonium chloride (1.1389 g, 1.0 equiv), NaHCO<sub>3</sub> (1.050 g, 2.5 equiv.) and allyl alcohol (0.4356 g, 1.5 equiv.) in DMF (20.0 mL) and the reaction mixture was stirred at 50 °C for 10 h. After concentration and purification by flash chromatography on silica gel (Eluent: 2% EtOAc /98% hexane), the product **1v** was obtained as pale-yellow viscous oil. <sup>1</sup>H NMR (400 MHz, CDCl<sub>3</sub>): δ 9.72 (s, 1H), 7.77-7.71 (m, 3H), 7.55 (s, 1H), 7.43-7.37 (m, 2H), 7.26 (dd, *J* = 8.4, 1.7, 1H), 3.04 (t, *J* = 7.6 Hz, 2H), 3.04 (dt, *J* = 7.6, 1.2 Hz, 2H), <sup>13</sup>C NMR (100 MHz, CDCl<sub>3</sub>): δ 201.6, 137.9, 133.7, 132.2, 128.3, 127.7, 127.6, 127.0, 126.5, 126.2, 125.6, 45.2 and 28.3

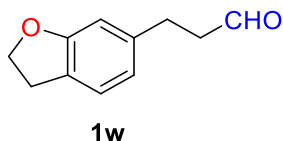

**3-(2,3-dihydrobenzofuran-6-yl)propanal (1w)<sup>1a</sup>:** This substrate was prepared using the *general procedure (A)*. The Schlenk tube was charged with 5-iodo-2,3-dihydro-1-benzofuran (1.2302 g, 5 mmol), Pd(OAc)<sub>2</sub> (0.0113 g, 0.1 mmol, 1 mol%), benzyltriethylammonium chloride (1.1389 g, 1.0 equiv.), NaHCO<sub>3</sub> (1.050 g, 2.5 equiv.) and allyl alcohol (0.4356 g, 1.5 equiv.) in DMF (20.0 mL) and the reaction mixture was stirred at 50 °C for 5 h. After concentration and purification by flash chromatography on silica gel (Eluent: 3% EtOAc /97% hexane), the product **1w** was obtained as colorless liquid. <sup>1</sup>H NMR (400 MHz, CDCl<sub>3</sub>): δ 9.83 (s, 1H), 7.05 (s, 1H), 6.95 (d, *J* = 8.1 Hz, 1H), 6.74 (d, *J* = 8.1 Hz, 1H), 4.59 (t, *J* = 8.7 Hz, 2H), 3.22 (t, *J* = 8.6 Hz, 2H), 2.92 (t, *J* = 7.5 Hz, 2H), 2.78 (t, *J* = 7.5 Hz, 2H); <sup>13</sup>C NMR (100 MHz, CDCl<sub>3</sub>): δ 201.9, 128.6, 132.2, 127.7, 127.3, 124.9, 109.2, 71.2, 45.8, 29.8 and 27.6

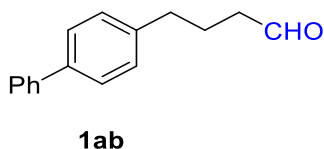

**4-([1,1'-biphenyl]-4-yl)butanal (1ab)<sup>1a</sup>:** This substrate was prepared using the *general procedure (A)*. The Schlenk tube was charged with 4-iodo-1,1'-biphenyl (1.4006 g, 5 mmol), Pd(OAc)<sub>2</sub> (0.0113 g, 0.1 mmol, 1 mol%), benzyltriethylammonium chloride (1.1389 g, 1.0 equiv.), NaHCO<sub>3</sub> (1.050 g, 2.5 equiv.) and butan-1-ol (0.585 g, 1.5 equiv) in DMF (20.0 mL) and the reaction mixture was stirred at 50 °C for 5 h. After concentration and purification by flash chromatography on silica gel (Eluent: 2% EtOAc /97% hexane), the product **1ab** was obtained as colorless liquid. <sup>1</sup>H NMR (400 MHz, CDCl<sub>3</sub>): δ 9.76 (s, 1H), 7.57 (d, *J* = 7.3 Hz, 2H), 7.52 (d, *J* = 8.1 Hz, 2H), 7.42 (t, *J* = 7.6 Hz, 2H), 7.32 (t, *J* = 7.4 Hz, 1H), 7.24 (d, *J* = 8.1 Hz, 2H), 2.69 (t, *J* = 7.6 Hz, 2H), 2.47 (td, *J* = 7.3, 1.5 Hz, 2H), 1.99 (p, *J* = 7.4 Hz, 2H); <sup>13</sup>C NMR (100 MHz, CDCl<sub>3</sub>): δ 202.2, 140.9, 140.3, 139.0, 128.8, 128.7, 127.1, 127.1, 126.9, 43.1, 34.6, 23.6. The observed <sup>1</sup>H and <sup>13</sup>C NMR values were in consistent with previously reported literature<sup>1b</sup>.

### Synthesis of 4-(3-oxopropyl)phenyl acetate (**1j**)<sup>2a</sup>

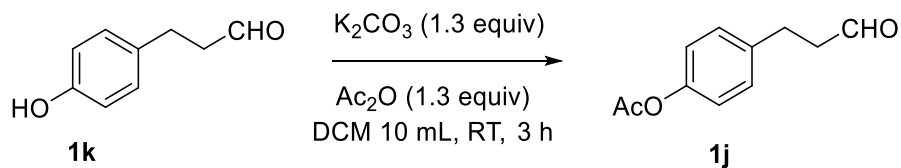

In a 50 mL round bottom flask, 3-(4-hydroxyphenyl)propanal (1.023 g, 3 mmol), potassium carbonate (1.3 equiv.) and 10 mL of DCM was added, and then allow the reaction mixture to stir at room temperature for 10 min, thereafter acetic anhydride (1.3 equiv.) was added drop wise and then stir the reaction mixture reaction mixture at room temperature for 3 h. The course of reaction mixture was monitor by TLC (thin layer chromatography). After the completion of reaction potassium carbonate was removed by filtration. After concentration and purification by flash chromatography on silica gel (Eluent: 7% EtOAc /93% hexane), the product **1j** was obtained in a yield of 87% as pale-yellow liquid.  $^1H$  NMR (400 MHz,  $CDCl_3$ ):  $\delta$  9.74 (s, 1H), 7.17 ( $J = 8.5$  Hz, 2H), 6.70 (d,  $J = 8.5$  Hz, 2H), 2.91 (t,  $J = 7.5$  Hz, 2H), 2.73 (t,  $J = 7.5$  Hz, 2H), 2.24 (s, 3H);  $^{13}C$  NMR (100 MHz,  $CDCl_3$ ):  $\delta$  201.4, 169.6, 149.1, 138.0, 129.3, 121.6, 45.1, 27.4 and 21.0. The observed  $^1H$  and  $^{13}C$  NMR values were in consistent with previously reported literature<sup>2b</sup>.

### Synthesis of 4-phenylpropanal derivatives<sup>3</sup>

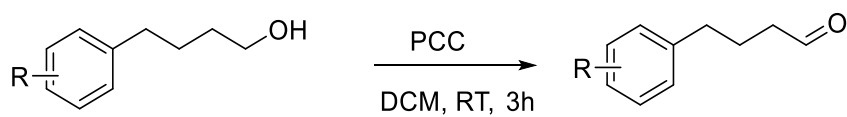

**General procedure (B):** To a well-stirred solution of substituted 4-phenyl-1-butanol (5 mmol) in dry dichloromethane (15.0 mL) in a 25 mL reaction tube was added Celite (Celite : alcohol = 1:1, wt/wt) and PCC (pyridinium chlorochromate, 2.6945g, 2.5 equiv), and then the reaction mixture was stirred at room temperature for 3 h. After the reaction was finished, the mixture was filtered through a pad of silica gel and washed with 50.0 mL of ethyl acetate. The solvent was removed under reduced pressure, and the residue was purified by flash chromatography on silica gel to provide the corresponding product in 60-65 % yields.

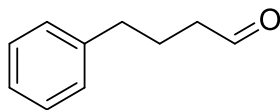

**1z**

**Synthesis of 4-phenylbutanal (1z)<sup>3</sup>:** This substrate was prepared using the *general procedure (B)* from 4-phenyl-1-butanol (0.8213 g, 5 mmol). After workup and purification of reaction mixture using flash chromatography on silica gel (Eluent: 3% EtOAc /97% hexane) provided **1z** in 64% yield as colorless viscous oil. <sup>1</sup>H NMR (400 MHz, CDCl<sub>3</sub>): δ 9.72 (s, 1H), 7.29 (t, *J* = 7.1 Hz, 2H), 7.20-7.15 (m, 3H), 2.65 (t, *J* = 7.5 Hz, 2H), 2.44 (td, *J* = 7.3, 1.5 Hz, 2H), 1.98 (quint, *J* = 7.7 Hz, 2H); <sup>13</sup>C NMR (100 MHz, CDCl<sub>3</sub>): δ 202.3, 141.3, 128.51, 128.50, 126.1, 43.2, 35.0 and 23.7

**Synthesis of 4-(4-methylphenyl)butan-1-ol (1aa):**

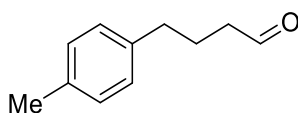

**1z**

**Synthesis of 4-phenylbutanal (1aa)<sup>3</sup>:** This substrate was prepared using the *general procedure (B)* from 4-(p-tolyl)butan-1-ol (0.8213 g, 5 mmol). After workup and purification of reaction mixture using flash chromatography on silica gel (Eluent: 2% EtOAc /98% hexane) provided **1aa** in 67% yield as colorless viscous oil. <sup>1</sup>H NMR (400 MHz, CDCl<sub>3</sub>): δ 9.79 (s, 1H), 7.20-7.14 (m, 4H), 2.71 (t, *J* = 7.3 Hz, 2H), 2.51 (td, *J* = 7.3, 1.8 Hz, 2H), 2.41 (s, 3H), 2.04 (quint, *J* = 7.7 Hz, 2H); <sup>13</sup>C NMR (100 MHz, CDCl<sub>3</sub>): δ 202.5, 138.2, 135.6, 129.2, 128.4, 43.2, 34.6, 23.8 and 21.1

**Synthesis of 3-(3-fluoro-5-methoxyphenyl)propanal (1o)<sup>4</sup>**

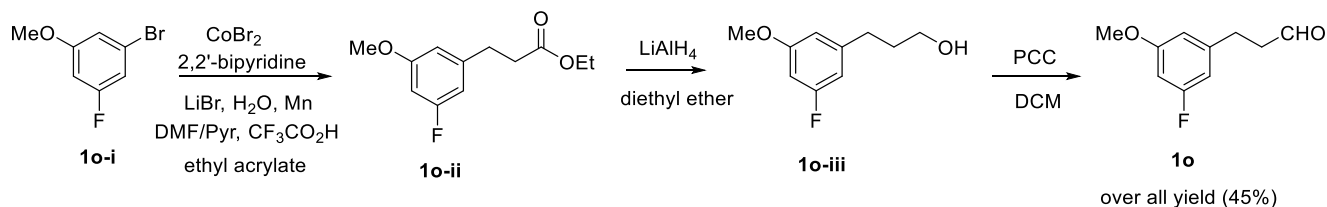

A 50 mL of Schlenk tube was charged with CoBr<sub>2</sub> (109 mg, 10 mol %), 2,2'-bipyridine (78 mg, 10 mol%), LiBr (434 mg, 5 mmol, 1 equiv.), manganese powder (550 mg, 10 mmol, 2 equiv.) and DMF (9 mL) and pyridine (1 mL). Mn powder was activated with traces of trifluoroacetic acid

(TFA, 100  $\mu$ L) and water (135  $\mu$ L) before addition to reaction mixture. Thereafter 1-bromo-3-fluoro-5-methoxybenzene (1.0251g, 5 mmol), ethyl acrylate (0.6674 g, 6 mmol, 1.2 equiv) was added to the reaction mixture stirred at 80 °C until 1-bromo-3-fluoro-5-methoxybenzene was consumed. After the completion of reaction, reaction mixture is poured into a solution of 2N HCl and extracted with DCM. The organic layer is washed with brine and dried over MgSO<sub>4</sub>. After concentration and purification by flash chromatography on silica gel (Eluent: 6% EtOAc /94% hexane), the product ethyl 3-(3-fluoro-5-methoxyphenyl)propanoate was obtained in (0.791 g, 70%) yield as a viscous oil. <sup>1</sup>H NMR (400 MHz, CDCl<sub>3</sub>):  $\delta$  6.54-6.44 (m, 3H), 4.16 (q,  $J$  = 7.1 Hz, 2H), 3.8 (s, 3H), 2.92 (t,  $J$  = 7.8 Hz, 2H), 2.62 (t,  $J$  = 7.8 Hz, 2H), 1.26 (t,  $J$  = 7.1 Hz, 3H); <sup>13</sup>C NMR (100 MHz, CDCl<sub>3</sub>):  $\delta$  172.6, 164.8 (d,  $J_{C-F}$  = 245.3 Hz), 160.8 (d,  $J_{C-F}$  = 11.4 Hz), 143.6 (d,  $J_{C-F}$  = 9.4 Hz), 109.9 (d,  $J_{C-F}$  = 2.9 Hz), 107.5 (d,  $J_{C-F}$  = 21.6 Hz), 99.5 (d,  $J_{C-F}$  = 26.1 Hz), 60.5, 55.4, 35.4, 30.8 (d,  $J_{C-F}$  = 2.4 Hz), 14.2; <sup>19</sup>F NMR (377 MHz, CDCl<sub>3</sub>):  $\delta$  -112.1

In second next step, 3-(3-fluoro-5-methoxyphenyl)propanoate (0.791 g, 3.5 mmol) was dissolved in diethyl ether (20 mL) and cool down to 0 °C and then NaBH<sub>4</sub> (132 mg, 1.2 equiv.) was added in portion wise, After being stirred at 0 °C for 10 min, the reaction was further stirred at room temperature for 4 h. After the completion of reaction (monitor by TCL), reaction mixture was quenched with saturated aqueous NH<sub>4</sub>Cl (20 mL). The aqueous and organic layer were separated by extraction of aqueous layer with DCM (2 x 10 mL). The DCM layer was passed over small pad of silica gel, and then organic extracts were dried over anhydrous Na<sub>2</sub>SO<sub>4</sub> and concentrate under reduced pressure. The crude product 3-(3-fluoro-5-methoxyphenyl)propan-1-ol was obtained in color less liquid. In final step crude 3-(3-fluoro-5-methoxyphenyl)propan-1-ol compound was oxidized to desired product (**1o**) following *general procedure (B)* with PCC. After concentration and purification by flash chromatography on silica gel (Eluent: 4% EtOAc /96% hexane), the product **1o** was obtained as viscous oil in overall 45% yield. <sup>1</sup>H NMR (400 MHz, CDCl<sub>3</sub>):  $\delta$  9.80 (s, 1H), 6.53-6.45 (m, 3H), 3.77 (s, 3H), 2.92 (t,  $J$  = 7.5 Hz, 2H), 2.79 (t,  $J$  = 7.5 Hz, 2H); <sup>13</sup>C NMR (100 MHz, CDCl<sub>3</sub>):  $\delta$  201.1, 164.9 (d,  $J_{C-F}$  = 244.3 Hz), 161.0 (d,  $J_{C-F}$  = 11.7 Hz), 143.5 (d,  $J_{C-F}$  = 9.4 Hz), 110.1 (d,  $J_{C-F}$  = 2.7 Hz), 107.5 (d,  $J_{C-F}$  = 21.6 Hz), 99.5 (d,  $J_{C-F}$  = 25.5 Hz), 55.5, 44.8, 28.8 (d,  $J_{C-F}$  = 2.5 Hz); <sup>19</sup>F NMR (377 MHz, CDCl<sub>3</sub>):  $\delta$  -111.9; HRMS (ESI) Calcd for C<sub>10</sub>H<sub>11</sub>FO<sub>2</sub> [M + H]<sup>+</sup> 183.0743, found 183.0663.

## Synthesis of 3-phenylpropanal derivatives from bromoarenes<sup>5</sup>

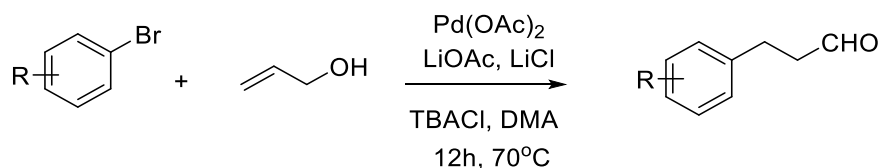

**General procedure (C):** In a glove box, a 100 mL of Schlenk tube equipped with magnetic stirring bar was charged with bromoarenes derivatives (5 mmol), Pd(OAc)<sub>2</sub> (0.1123g, 10 mol%), lithium acetate (0.8248 g, 12.5 mmol, 2.5 equiv.), lithium chloride (0.2073 g, 5 mmol, 1equiv.), tetrabutylammonium chloride (2.7792 g, 10 mmol, 2 equiv.). The tube was fitted with a rubber septum and moved out of the glove box. Then allyl alcohol (0.726 mL, 2.0 equiv.) and DMA (20.0 mL) were added in Schlenk tube through the rubber septum using syringes, and then the septum was replaced with a Teflon screwcap under nitrogen flow. The reaction mixture was stirred at 70 °C for 12 h. Upon cooling to room temperature, the reaction mixture was filtrated through a pad of silica gel, washed with 50 mL of ethyl acetate. The organic layer was dried over anhydrous Na<sub>2</sub>SO<sub>4</sub> and concentrated under reduced pressure. The residue was purified by flash chromatography on silica gel to provide the corresponding product in 50-60 % yields.

## Synthesis of 3-(4-chloro-3-methoxyphenyl)propanal (**1u**)<sup>5</sup>

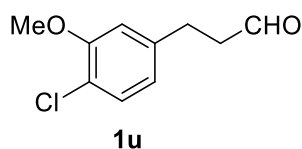

This substrate was prepared using the *general procedure (C)* with 4-bromo-1-chloro-2-methoxybenzene (1.1074 g, 5 mmol). After workup and purification of reaction mixture using flash chromatography on silica gel (Eluent: 2% EtOAc /98% hexane), provide the corresponding product (**1u**) in 51 % yield as viscous oil. <sup>1</sup>H NMR (400 MHz, CDCl<sub>3</sub>): δ 9.81 (s, 1H), 7.26 (d, *J* = 8.0 Hz, 1H), δ 6.77 (d, *J* = 1.5 Hz, 1H), 6.72 (dd, *J* = 8.0, 1.5 Hz, 1H), 3.88 (s, 3H), 2.93 (t, *J* = 7.5 Hz, 2H), 2.78 (t, *J* = 7.5 Hz, 2H); <sup>13</sup>C NMR (100 MHz, CDCl<sub>3</sub>): δ 201.0, 154.8, 140.5, 130.1, 120.9, 120.2, 112.3, 55.9, 45.1 and 27.8. HRMS (ESI) Calcd for C<sub>10</sub>H<sub>11</sub>ClO<sub>2</sub> [M + H]<sup>+</sup> 199.0457, found 199.0456.

## Synthesis of 3-(1-oxo-2,3-dihydro-1H-inden-5-yl)propanal (**1y**):



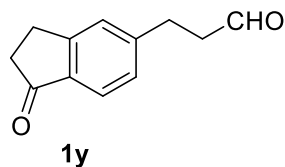

This substrate was prepared using the *general procedure (C)* with 5-bromo-2,3-dihydro-1H-inden-1-one (1.0553 g, 5 mmol). After workup and purification of reaction mixture using flash chromatography on silica gel (Eluent: 15% EtOAc /85% hexane), provide the corresponding product (**1y**) in 53 % yield as white solid, m.p. 42-44 °C;  $^1\text{H NMR}$  (400 MHz,  $\text{CDCl}_3$ ):  $\delta$  9.85 (s, 1H), 7.71 (d,  $J = 7.8$  Hz, 1H), 7.33 (s, 1H), 7.23 (d,  $J = 7.9$  Hz, 1H), 3.14 (t,  $J = 6.1$  Hz, 2H), 3.07 (t,  $J = 7.4$  Hz, 2H), 2.88 (t,  $J = 7.5$  Hz, 2H), 2.72 (t,  $J = 7.5$  Hz, 2H);  $^{13}\text{C NMR}$  (100 MHz,  $\text{CDCl}_3$ ):  $\delta$  206.5, 200.7, 155.9, 148.0, 135.6, 127.8, 126.5, 123.9, 44.9, 36.4, 28.4, 25.7. The observed  $^1\text{H}$  and  $^{13}\text{C}$  NMR values were in consistent with previously reported literature<sup>5b</sup>.

### Synthesis of 3-(benzo[d][1,3]dioxol-5-yl)propanal (**1x**)<sup>6</sup>

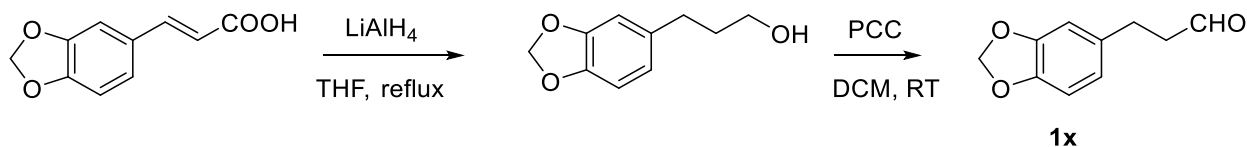

A 150 mL of two neck round bottom flask was charged with  $\text{LiAlH}_4$  (0.4744g, 12.5 mmol, 2.5 equiv) and 20 mL of THF. The solution was warmed to 50 °C and then (E)-3-(benzo[d][1,3]dioxol-5-yl)acrylic acid (0.9609 g, 5 mmol) dissolved in 20 mL of THF was slowly with the help of dropping funnel over the time period of 20 min., thereafter reaction mixture was reflux for 2-3 h. The completion of reaction was monitor by TLC. After completion, reaction mixture was poured to ice cold water and then 5% HCl solution (10 mL) was added and extract with 50 mL of EtOAc. The combined organic layer was washed with saturated solution of  $\text{NaHCO}_3$  (20 mL) and brine 15 mL. The organic layer was dried over anhydrous  $\text{Na}_2\text{SO}_4$  and concentrated under reduced pressure. The crude residual of 3-(benzo[d][1,3]dioxol-5-yl)propan-1-ol was used as such for next step. In next step crude 3-(benzo[d][1,3]dioxol-5-yl)propan-1-ol compound was oxidized to desired product (**1x**) following *general procedure (B)* with PCC. After concentration and purification by flash chromatography on silica gel (Eluent: 6% EtOAc /94% hexane), the product **1x** was obtained in (35%) yield as a viscous oil.  $^1\text{H NMR}$  (400 MHz,  $\text{CDCl}_3$ ):  $\delta$  9.82 (s, 1H), 6.76 (d,  $J = 7.8$  Hz, 1H), 6.70 (s, 1H), 6.67 (d,  $J = 7.8$  Hz, 1H), 5.90 (s, 2H), 2.92 (t,  $J = 7.5$  Hz, 2H), 2.77 (t,  $J = 7.5$

Hz, 2H);  $^{13}\text{C}$  NMR (100 MHz,  $\text{CDCl}_3$ ):  $\delta$  201.6, 147.7, 145.9, 134.1, 121.1, 108.8, 108.3, 100.9, 45.6, 27.9. The observed  $^1\text{H}$  and  $^{13}\text{C}$  NMR values were in consistent with previously reported literature<sup>6b</sup>.

### Synthesis of 5-phenylpentanal (**1ac**)<sup>7</sup>

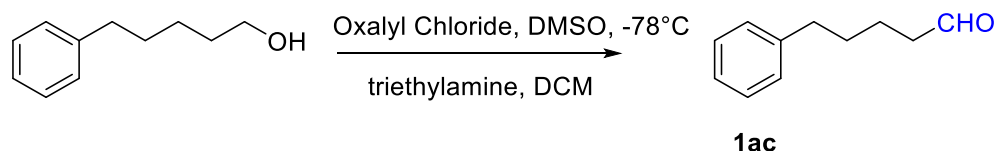

Under nitrogen atmosphere, a 150 mL of round bottom flask equipped with stirring bar was cooled down to  $-78^\circ\text{C}$ , thereafter solution of oxalyl chloride (0.6 mL, 7.13 mmol) in dry DCM (70 mL) was added, and then DMSO (0.47 mL, 6.59 mmol) was added dropwise. After stirring the solution at  $-78^\circ\text{C}$  for 30 minutes, 5-phenyl-pentanol (0.9 g, 5.49 mmol) in dry DCM (10 mL) was added dropwise. Thereafter reaction mixture was stirred at  $-78^\circ\text{C}$  for 1 h, and then triethyl amine ( $\text{Et}_3\text{N}$ ) was added dropwise. The reaction mixture was warmed up to room temperature then concentrated to dryness. The crude product was extracted with 100 mL of diethyl ether (100 mL) and washed with sat.  $\text{NH}_4\text{Cl}$  solution (100 mL). The organic layer was dried over sodium sulfate, filtered and concentrated to dryness. The organic layer was concentrated in rotary evaporator *vacuo* and purified via using flash chromatography; Eluent: (1% EtOAc /99% hexane); Appearance: viscous oil; overall isolated yield: 76%.  $^1\text{H}$  NMR (400 MHz,  $\text{CDCl}_3$ ):  $\delta$  9.74 (s, 1H), 7.28 (ddt,  $J = 7.7, 6.4, 1.0$  Hz, 2H), 7.21 – 7.14 (m, 3H), 2.65 – 2.61 (m, 2H), 2.46– 2.42 (m, 2H), 1.68 – 1.64 (m, 4H) ;  $^{13}\text{C}$  NMR (100 MHz,  $\text{CDCl}_3$ ):  $\delta$  202.6, 141.9, 128.3, 128.3, 125.8, 43.7, 35.6, 30.8, and 21.6 ; HRMS (ESI) Calcd for  $\text{C}_{11}\text{H}_{14}\text{O}$  [ $\text{M} + \text{H}$ ]<sup>+</sup> 163.1042, found 163.1039; The observed  $^1\text{H}$  and  $^{13}\text{C}$  NMR values were in consistent with previously reported literature.<sup>7</sup>

### Synthesis of 6-phenylhexanal<sup>8</sup>

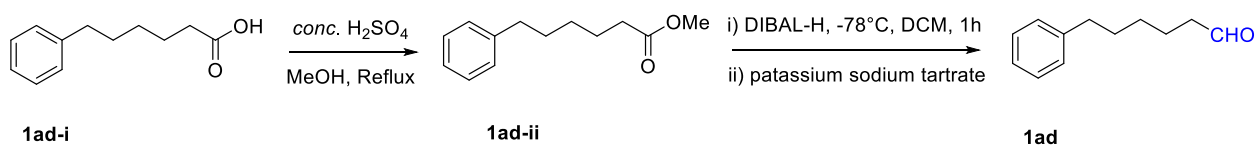

A 150 mL of round bottom flask equipped with stirring bar and condenser was charged with 6-phenylhexanoic acid (2.7 g, 14.0 mmol), MeOH (70 mL) and catalytic amount of *conc.* H<sub>2</sub>SO<sub>4</sub> were refluxed for 5 h. After the completion of reaction, solvent was evaporated and extracted with EtOAc, washed with brine and dry over Na<sub>2</sub>SO<sub>4</sub>. The organic layer was concentrated in rotary evaporator *vacuo*. Light brownish liquid was obtained in 87% yield which was used without any purification for next step. **<sup>1</sup>H NMR** (400 MHz, CDCl<sub>3</sub>): δ 7.29 – 7.25 (m, 2H), 7.19 – 7.15 (m, 3H), 3.66 (s, 3H), 2.61 (7.5 Hz, 2H), 2.30 (t, *J* = 7.5 Hz, 2H), 1.80 – 1.54 (m, 4H), 1.48 – 1.30 (m, 2H); **<sup>13</sup>C NMR** (100 MHz, CDCl<sub>3</sub>): δ 174.2, 142.5, 128.3, 128.2, 125.6, 51.4, 35.7, 33.9, 31.1, 28.7 and 24.8; **HRMS** (ESI) Calcd for C<sub>13</sub>H<sub>18</sub>O<sub>2</sub> [M + H]<sup>+</sup> 207.1370, found 207.1360; The observed <sup>1</sup>H and <sup>13</sup>C NMR values were in consistent with previously reported literature.<sup>8</sup>

In next the solution of methyl 6-phenylhexanoate (1.5 g, 7.3 mmol) in anhydrous DCM (30 mL) was cooled down to -78 °C and then DIBAL-H (9 mL, 1M in Hexane, 1.1 equiv.) was added drop wise. The resulting solution was stirred at -78 °C for 2h and quenched with MeOH (10 mL). The reaction mixture was then poured in DCM and potassium sodium tartrate aqueous and stirred vigorously for 4 h. The reaction mixture was extracted with DCM, washed with brine, dried over Na<sub>2</sub>SO<sub>4</sub>. The organic layer was concentrated in rotary evaporator *vacuo* and purified *via* using flash chromatography; Eluent: (1% EtOAc /99% hexane); Appearance: viscous oil; overall isolated yield: 71%. **<sup>1</sup>H NMR** (400 MHz, CDCl<sub>3</sub>): δ 9.74 (s, 1H), 7.29 – 7.25 (m, 2H), 7.17 (td, *J* = 6.7, 1.7 Hz, 3H), 2.61 (t, *J* = 7.4 Hz, 2H), 2.41 (td, *J* = 7.4, 1.8 Hz, 2H), 1.69–1.60 (m, 4H), 1.40 – 1.32 (m, 2H); **<sup>13</sup>C NMR** (100 MHz, CDCl<sub>3</sub>): δ 202.7, 142.3, 128.3, 128.2, 125.7, 43.8, 35.6, 31.1, 28.7 and 21.9; **HRMS** (ESI) Calcd for C<sub>12</sub>H<sub>16</sub>O [M + H]<sup>+</sup> 177.1230, found 177.1229. The observed <sup>1</sup>H and <sup>13</sup>C NMR values were in consistent with previously reported literature.<sup>8</sup>

### Synthesis of 2-methyl-3-phenylpropanal<sup>9</sup>

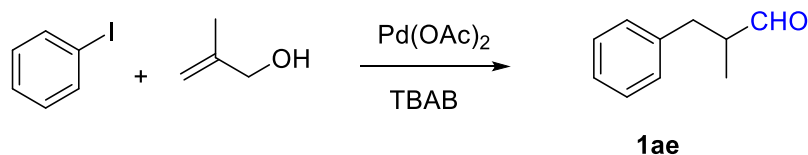

A 100 mL Schlenk tube equipped with a stir bar was charged with iodobenzene (0.6 mL, 5.0 mmol), 2-methylallyl alcohol (1.4 mL, 15 mmol), Pd(OAc)<sub>2</sub> (56 mg, 5 mol%), TBAB (1.0 equiv.) and NaHCO<sub>3</sub> (1.0 equiv.). The reaction mixture was stirred at 120 °C for 24 h. Upon cooling to

room temperature, the reaction mixture was filtrated through a pad of silica gel, washed with 50 mL of ethyl acetate and washed twice with water (20.0 mL). The organic layer was dried over anhydrous  $\text{Na}_2\text{SO}_4$  and concentrated under reduced pressure and purified *via* using flash chromatography; Eluent: (1% EtOAc /99% hexane); Appearance: viscous oil; overall isolated yield: 65%.  $^1\text{H NMR}$  (400 MHz,  $\text{CDCl}_3$ ):  $\delta$  9.71 (d,  $J = 1.5$  Hz, 1H), 7.31 – 7.27 (m, 2H), 7.23 – 7.15 (m, 3H), 3.08 (dd,  $J = 13.3, 5.6$  Hz, 1H), 2.70 – 2.57 (m, 2H), 1.08 (d,  $J = 6.8$  Hz, 3H);  $^{13}\text{C NMR}$  (100 MHz,  $\text{CDCl}_3$ ):  $\delta$  204.4, 138.8, 128.9, 128.5, 126.4, 47.9, 36.6 and 13.1. The observed  $^1\text{H}$  and  $^{13}\text{C}$  NMR values were in consistent with previously reported literature.<sup>9</sup>

### Preparation and characterization of acrylates used as starting material (2i-2n, 2j)<sup>10-12</sup>

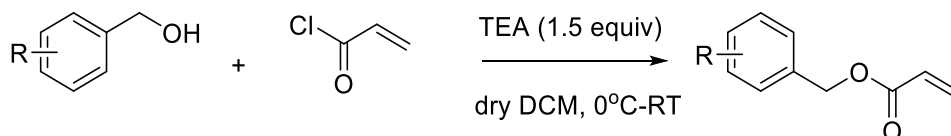

**General procedure (D):** To a stirred solution of substituted benzyl chloride (10 mmol) and triethyl amine (TEA) (15 mmol, 1.5 equiv) in dry DCM (15 mL) was added acryloyl chloride (10 mmol) dropwise under nitrogen atmosphere at 0 °C. After being stirred at 0 °C for 30 min., the reaction was further stirred at room temperature till the consumption of starting material (monitored by thin layer chromatography (TLC)). After the completion of reaction, the reaction mixture was quenched with  $\text{H}_2\text{O}$  (30 mL) and ammonium chloride ( $\text{NH}_4\text{Cl}$ ) aqueous (30 mL). The solvent was dried over anhydrous  $\text{Na}_2\text{SO}_4$  and concentration under reduced pressure. The residue was purified by flash chromatography on silica gel (Eluent: EtOAc/hexane) to provide the corresponding product in 70-80 % yields.

### Synthesis of 4-methylbenzyl acrylate (2i):

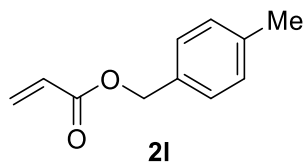

This substrate was prepared using the *general procedure (D)*. To a solution of 4-methylbenzyl alcohol (1.221 g, 10 mmol), and triethyl amine (TEA) (1.897 mL, 15 mmol, 1.5 equiv) in dry DCM (15 mL) was added acryloyl chloride (0.8228 mL, 10 mmol, 1 equiv.) dropwise under nitrogen

atmosphere at 0 °C. After being stirred at 0 °C for 30 min, the reaction was further stirred at room temperature for 10 h. After the completion of reaction, followed by workup and purification by flash chromatography on silica gel (Eluent: 3% EtOAc /97% hexane), the product **2l** was obtained as transparent viscous liquid.  $^1\text{H NMR}$  (400 MHz,  $\text{CDCl}_3$ ):  $\delta$  7.36 (d,  $J = 8.0$  Hz, 2H), 7.25 (d,  $J = 8.0$  Hz, 2H), 6.54 (dd,  $J = 15.9, 1.5$  Hz, 1H), 6.26 (dd,  $J = 17.3, 10.3$  Hz, 1H), 5.88 (dd,  $J = 8.9, 1.5$  Hz, 1H), 5.25 (s, 2H), 2.41 (s, 3H);  $^{13}\text{C NMR}$  (100 MHz,  $\text{CDCl}_3$ ):  $\delta$  165.9, 138.1, 133.0, 130.9, 129.3, 128.5, 66.3 and 21.2

#### Synthesis of 4-fluorobenzyl acrylate (**2m**):

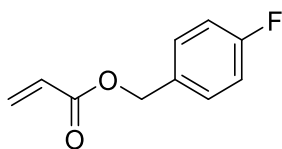

This substrate was prepared using the *general procedure (D)*. To a solution of 4-fluorobenzyl alcohol (1.261 g, 10 mmol), and triethyl (TEA) (1.897 mL, 15 mmol, 1.5 equiv) in dry DCM (15 mL) was added acryloyl chloride (0.8228 mL, 10 mmol, 1 equiv.) dropwise under nitrogen atmosphere at 0 °C. After being stirred at 0 °C for 30 min, the reaction was further stirred at room temperature for 10 h. After the completion of reaction, followed by workup and purification by flash chromatography on silica gel (Eluent: 5% EtOAc /95% hexane), the product **2m** was obtained as transparent viscous liquid.  $^1\text{H NMR}$  (400 MHz,  $\text{CDCl}_3$ ):  $\delta$  7.37-7.34 (m, 2H), 7.06 (t,  $J = 8.7$  Hz, 2H), 6.64 (dd,  $J = 15.9, 1.4$  Hz, 1H), 6.18 (dd,  $J = 17.4, 10.4$  Hz, 1H), 5.86 (dd,  $J = 10.4, 1.4$  Hz, 1H), 5.15 (s, 2H);  $^{13}\text{C NMR}$  (100 MHz,  $\text{CDCl}_3$ ):  $\delta$  165.9, 163.9 (d,  $J_{\text{C-F}} = 247.5$  Hz), 131.7 (d,  $J_{\text{C-F}} = 3.3$  Hz), 131.3, 130.3 (d,  $J_{\text{C-F}} = 8.4$  Hz), 128.2, 115.6 (d,  $J_{\text{C-F}} = 21.5$  Hz) and 65.6;  $^{19}\text{F NMR}$  (377 MHz,  $\text{CDCl}_3$ ):  $\delta$  -113.6

#### Synthesis of 3,4-difluorobenzyl acrylate (**2n**):

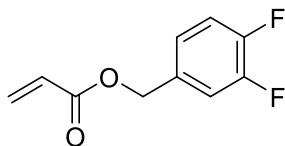

This substrate was prepared using the *general procedure (D)*. To a solution of 3,4-difluorobenzyl alcohol (1.441 g, 10 mmol), and triethyl (TEA) (1.897 mL, 15 mmol, 1.5 equiv.) in dry DCM (15

mL) was added acryloyl chloride (0.8228 mL, 10 mmol, 1 equiv) dropwise under nitrogen atmosphere at 0 °C. After being stirred at 0 °C for 30 min, the reaction was further stirred at room temperature for 10 h. After the completion of reaction, followed by workup and purification by flash chromatography on silica gel (Eluent: 5% EtOAc /95% hexane), the product **2n** was obtained as transparent viscous liquid. **<sup>1</sup>H NMR** (400 MHz, CDCl<sub>3</sub>): δ 7.28-7.09 (m, 3H), 6.48 (d, *J* = 17.4 Hz, 1H), 6.20 (dd, *J* = 17.4, 10.4 Hz, 1H), 5.89 (d, *J* = 10.4 Hz, 1H), 5.14 (s, 2H); **<sup>13</sup>C NMR** (100 MHz, CDCl<sub>3</sub>): δ 165.7, 151.5 (dd, *J*<sub>IC-F</sub> = 248.3 Hz, *J*<sub>2C-F</sub> = 7.4 Hz), 151.4 (dd, *J*<sub>IC-F</sub> = 248.7 Hz, *J*<sub>2C-F</sub> = 7.1 Hz), 133.0 (dd, *J*<sub>IC-F</sub> = 3.9 Hz, *J*<sub>2C-F</sub> = 5.6 Hz), 131.5, 124.4 (dd, *J*<sub>IC-F</sub> = 6.5 Hz, *J*<sub>2C-F</sub> = 3.7 Hz), 124.4 (dd, *J*<sub>IC-F</sub> = 6.5 Hz, *J*<sub>2C-F</sub> = 3.7 Hz), 117.4 (dd, *J*<sub>IC-F</sub> = 17.6 Hz, *J*<sub>2C-F</sub> = 9.4 Hz), 64.9; **<sup>19</sup>F NMR** (377 MHz, CDCl<sub>3</sub>): δ -137.2 (d, *J*<sub>C-F</sub> = 21.4), -138.2 (d, *J*<sub>C-F</sub> = 21.4); **HRMS** (ESI) Calcd for C<sub>10</sub>H<sub>8</sub>F<sub>2</sub>O<sub>2</sub> [M + H]<sup>+</sup> 199.0565, found 199.0566

#### Synthesis of (tetrahydro-2H-pyran-2-yl)methyl acrylate (**2j**):

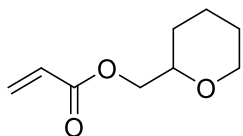

This substrate was prepared using the *general procedure (D)*. To a solution of (tetrahydro-2H-pyran-2-yl)methanol (1.1616 g, 10 mmol), and triethyl (TEA) (1.897 mL, 15 mmol, 1.5 equiv.) in dry DCM (15 mL) was added acryloyl chloride (0.8228 mL, 10 mmol, 1 equiv.) dropwise under nitrogen atmosphere at 0 °C. After being stirred at 0 °C for 30 min., the reaction was further stirred at room temperature for 10 h. After the completion of reaction, followed by workup and purification by flash chromatography on silica gel (Eluent: 2% EtOAc /98% hexane), the product **2j** was obtained as transparent viscous liquid. **<sup>1</sup>H NMR** (400 MHz, CDCl<sub>3</sub>): δ 6.30 (dd, *J* = 15.8, 1.5 Hz, 1H), 6.05 (dd, *J* = 17.3, 10.3 Hz, 1H), 5.70 (dd, *J* = 10.5, 1.6 Hz, 1H), 4.01-3.93 (m, 2H), 3.87-3.83 (m, 1H), 3.46-3.40 (m, 1H), 3.32 (td, *J* = 11.3, 2.6 Hz, 1H), 1.74-1.71 (m, 1H), 1.46-1.32 (m, 4H), 1.24-1.15 (m, 1H); **<sup>13</sup>C NMR** (100 MHz, CDCl<sub>3</sub>): δ 165.8, 130.7, 128.2, 75.2, 68.2, 67.3, 27.7, 25.6, 22.8

#### Preparation and characterization of starting materials derived from natural products and drug molecules (**5a-11a**)

**Synthesis of 3-((8*R*,9*S*,13*S*,14*S*)-13-methyl-17-oxo-7,8,9,11,12,13,14,15,16,17-decahydro-6*H*-cyclopenta[*a*]phenanthren-3-yl)propanal (6a):**

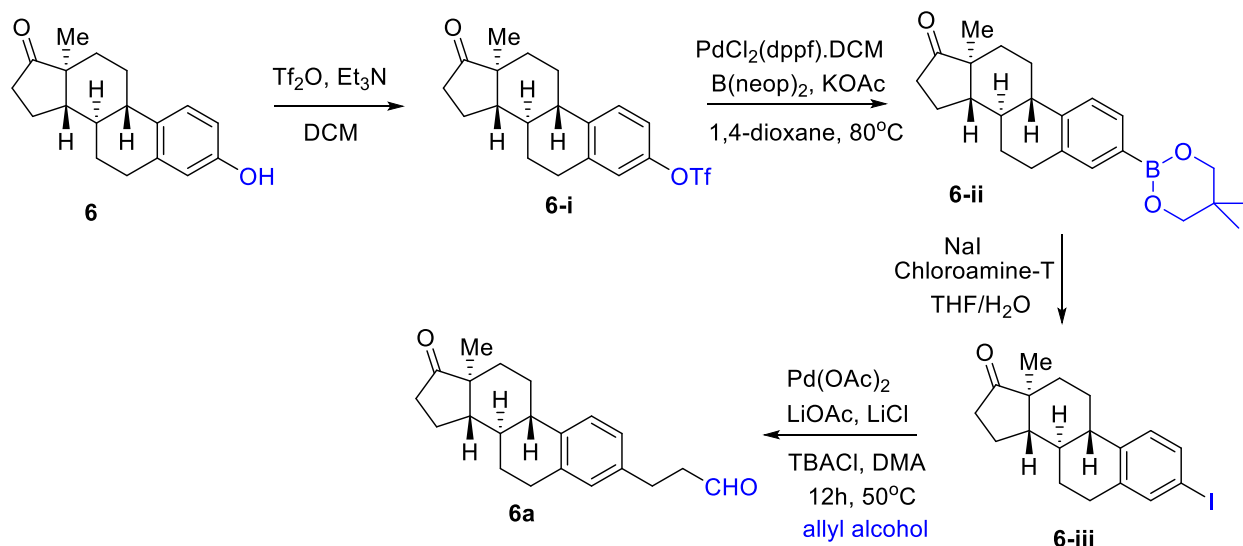

**Step 1: Synthesis of (8*R*,9*S*,13*S*,14*S*)-13-methyl-17-oxo-7,8,9,11,12,13,14,15,16,17-decahydro-6*H*-cyclopenta[*a*]phenanthren-3-yl trifluoromethanesulfonate <sup>13</sup>**

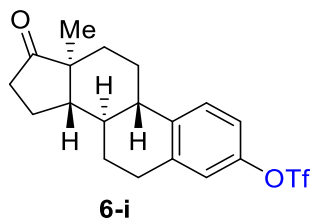

A 150 mL round bottom flask equipped with stirring bar was charged with estrone (1.3519 g, 5 mmol), trifluoromethanesulfonic anhydride (1.5001 g, 5 mmol, 1.2 equiv.) and DCM (30 mL). The solution was cooled down to  $0^\circ\text{C}$  and then triethylamine (1.265 mL, 10 mmol, 2 equiv.) dissolved in 15 mL of DCM was added dropwise to the reaction mixture over a time period of 20 min. The solution was stirred for 50 min. at  $0^\circ\text{C}$  followed by room temperature stirred till the consumption of starting material (monitor by TLC). Thereafter,  $\text{NaHCO}_3$  (35 mL) was added to reaction mixture. The phases were separated and aqueous layer was extracted with DCM (2x20mL). The combine organic layers were washed with brine and dried over anhydrous  $\text{Na}_2\text{SO}_4$ . The organic layer was concentrated in *vacuo* and purified by flash column chromatography using silica gel; Eluent: (3%  $\text{EtOAc}$  /97% hexane); Appearance: colorless oil; isolated yield: (1.87 g,

93%).  $^1\text{H NMR}$  (400 MHz,  $\text{CDCl}_3$ ): 7.34 (d,  $J = 8.6$  Hz, 1H), 7.04 (dd,  $J = 8.7, 2.5$  Hz, 1H), 7.00 (d,  $J = 2.5$  Hz, 1H), 2.97-2.92 (m, 2H), 2.51 (dd,  $J = 19.2, 9.8$  Hz, 1H), 2.43-2.38 (m, 1H), 2.33-2.27 (m, 1H), 2.20-1.96 (m, 4H), 1.68-1.41 (m, 6H), 0.92 (s, 3H);  $^{13}\text{C NMR}$  (100 MHz,  $\text{CDCl}_3$ ):  $\delta$  220.4, 147.5, 140.2, 139.2, 127.1, 121.1, 118.2, 50.3, 47.8, 44.0, 37.6, 35.7, 31.4, 29.3, 26.0, 25.6, 21.5, 13.8;  $^{19}\text{F NMR}$  (377 MHz,  $\text{CDCl}_3$ ):  $\delta$  -72.95 Hz, The observed  $^1\text{H}$  and  $^{13}\text{C}$  NMR values were in consistent with previously reported literature.<sup>13</sup>

**Step 2: Synthesis of (8*R*,9*S*,13*S*,14*S*)-3-(5,5-dimethyl-1,3,2-dioxaborinan-2-yl)-13-methyl-6,7,8,9,11,12,13,14,15,16-decahydro-17*H*-cyclopenta[*a*]phenanthren-17-one<sup>14</sup>**

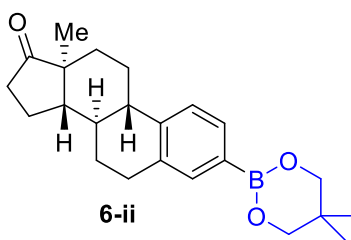

A 150 mL Schlenk tube equipped with stirring bar was charged with triflate (**6-i**) (1.81 g, 4.5 mmol), bis(neopentyl glycolato)diboron (1.524 g, 6.75 mmol, 1.5 equiv),  $\text{PdCl}_2(\text{dppf})\cdot\text{DCM}$  (186 mg, 5 mol%), KOAc (1.324 g, 13.5 mmol, 3 equiv.), and 1,4-dioxane (30 mL). The solution was stirred at 80 °C for 18 h. The reaction mixture was cooled down to room temperature and filtrated through Celite, washed with EtOAc (100 mL) and then concentrated under reduced pressure. The crude reaction mixture was purified by flash column chromatography using silica gel; Eluent: (7% EtOAc /93% hexane); Appearance: white solid; isolated yield: (0.842 g, 51%), m.p. 228-230 °C;  $^1\text{H NMR}$  (400 MHz,  $\text{CDCl}_3$ ): 7.59 (d,  $J = 7.9$  Hz, 1H), 7.54 (s, 1H), 7.30 (d,  $J = 7.9$  Hz, 1H), 3.76 (s, 4H), 2.95-2.93 (m, 2H), 2.54-2.43 (m, 2H), 2.35-2.30 (m, 1H), 2.19-1.94 (m, 4H), 1.66-1.42 (m, 6H), 1.01 (s, 6H), 0.91 (s, 3H);  $^{13}\text{C NMR}$  (100 MHz,  $\text{CDCl}_3$ ):  $\delta$  220.9, 142.4, 135.5, 134.7, 131.3, 124.6, 72.3, 50.6, 48.0, 44.7, 38.0, 35.8, 31.9, 29.2, 26.5, 25.6, 21.8, 21.6, 13.8; The observed  $^1\text{H}$  and  $^{13}\text{C}$  NMR values were in consistent with previously reported literature<sup>14</sup>.

**Step 3: Synthesis of (8*R*,9*S*,13*S*,14*S*)-3-iodo-13-methyl-6,7,8,9,11,12,13,14,15,16-decahydro-17*H*-cyclopenta[*a*]phenanthren-17-one<sup>14</sup>**



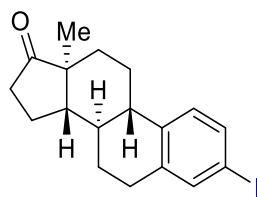

**6-iii**

To a stirred solution of dioxaborinane derivative (**6-ii**) (0.84 g, 2 mmol) in 1:1 THF:H<sub>2</sub>O (10 mL) at 0 °C was added solution of NaI (0.449 g, 3 mmol, 1.5 equiv.) in H<sub>2</sub>O (10 mL). Thereafter, Chloroamine-T.3H<sub>2</sub>O (1.4 g, 5 mmol, 2.5 equiv.) dissolved in 1:1 THF:H<sub>2</sub>O (15 mL) was added dropwise over a time period of 20 min (using dropping funnel) to stirred reaction mixture at 0°C. After stirred the reaction mixture at 25 °C for 36 h, saturated aqueous Na<sub>2</sub>S<sub>2</sub>O<sub>3</sub> (50 mL) was added and reaction mixture was extracted with EtOAc (2x100 mL). The combine organic layers were washed with brine and dried over anhydrous Na<sub>2</sub>SO<sub>4</sub>. The organic layer was concentrated in *vacuo* and purified by flash column chromatography using silica gel; Eluent: (6% EtOAc /94% hexane); Appearance: white solid; isolated yield: (0.487 g, 64%), m.p. 224-227 °C; <sup>1</sup>H NMR (400 MHz, CDCl<sub>3</sub>): 7.46-7.45 (m, 2H), 7.02 (d, *J* = 8.3 Hz, 1H), 2.89-2.85 (m, 2H), 2.53 (dd, *J* = 18.4, 8.9 Hz, 1H), 2.40-2.35 (m, 1H), 2.27-2.22 (m, 1H), 2.19-1.95 (m, 4H), 1.68-1.37 (m, 6H), 0.90 (s, 3H); <sup>13</sup>C NMR (100 MHz, CDCl<sub>3</sub>): δ 220.7, 139.5, 139.2, 137.7, 134.7, 127.4, 91.2, 50.4, 47.9, 44.1, 37.9, 35.8, 31.5, 28.9, 26.2, 25.6, 21.6, 13.8; The observed <sup>1</sup>H and <sup>13</sup>C NMR values were in consistent with previously reported literature<sup>14</sup>.

**Step 4: Synthesis of 3-((8*R*,9*S*,13*S*,14*S*)-13-methyl-17-oxo-7,8,9,11,12,13,14,15,16,17-decahydro-6*H*-cyclopenta[*a*]phenanthren-3-yl)propanal**

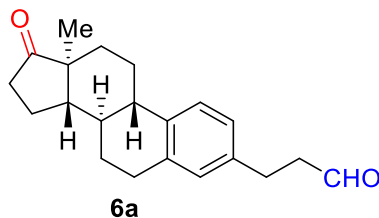

**6a**

Substrate (**6a**) was prepared using the *general procedure (C)*. The 50 mL Schlenk tube was charged with compound (**6-iii**) (0.456 g, 1.2 mmol), Pd(OAc)<sub>2</sub> (27 mg, 10 mol%), lithium acetate (198 mg, 2.5 equiv.), lithium chloride (50 mg, 1equiv.), tetrabutylammonium chloride (667 mg, 2 equiv.), allyl alcohol (174 μL, 2.0 equiv), DMA (10 mL) and then reaction mixture was stirred at 50 °C

for 5 h. After workup, concentration and purification by flash chromatography on silica gel: (Eluent: 15% EtOAc /85% hexane), Appearance: white solid; isolated yield: (0.238 g, 63%), m.p. 127-129 °C; **<sup>1</sup>H NMR** (400 MHz, CDCl<sub>3</sub>): 9.82 (s, 1H), 7.23 (*J* = 8.0 Hz, 1H), 6.99 (*J* = 8.2 Hz, 1H), 6.94 (s, 1H), 2.92-2.89 (m, 4H), 2.77 (t, *J* = 7.3 Hz, 2H), 2.50 (dd, *J* = 18.4, 8.9 Hz, 1H), 2.44-2.39 (m, 1H), 2.30-2.25 (m, 1H), 2.19-1.94 (m, 4H), 1.68-1.41(m, 6H), 0.90 (s, 3H); **<sup>13</sup>C NMR** (100 MHz, CDCl<sub>3</sub>): δ 220.8, 201.7, 137.7, 136.6, 128.9, 125.6, 125.5, 50.4, 47.9, 45.2, 44.2, 38.1, 35.8, 31.5, 29.3, 27.5, 26.4, 25.6, 21.5, 13.8; **HRMS** (ESI) Calcd for C<sub>21</sub>H<sub>26</sub>O<sub>2</sub> [M + H]<sup>+</sup> 331.2006, found 331.2005

### Synthesis of 3-(4-(4-oxochroman-2-yl)phenyl)propanal (5a):

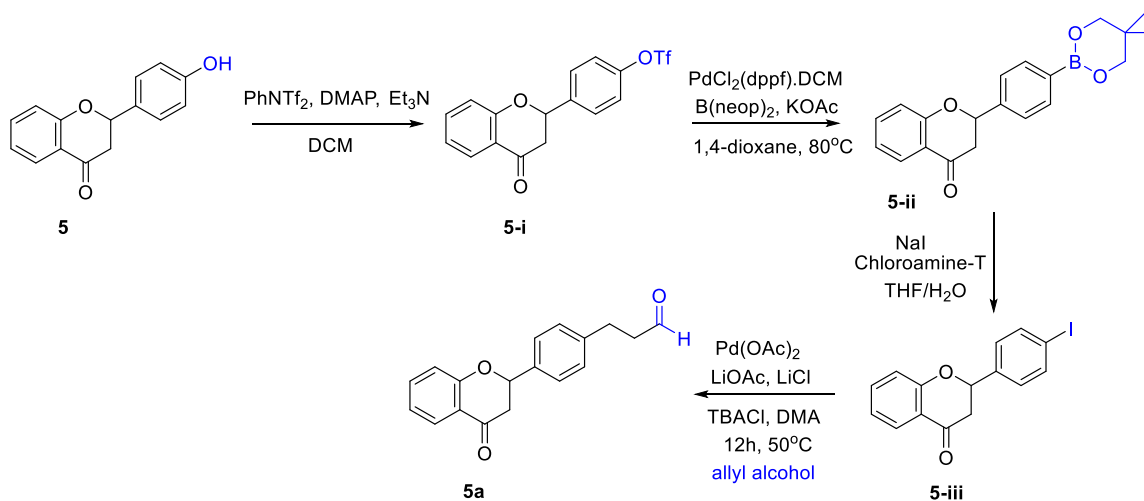

### Step 1: Synthesis of 4-(4-oxochroman-2-yl)phenyl trifluoromethanesulfonate<sup>15</sup>

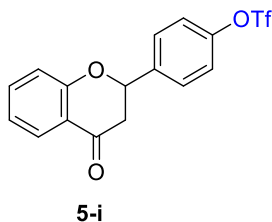

To a stirred solution of 2-(4-hydroxyphenyl)chroman-4-one (1.442 g, 6 mmol) in DCM (20 mL) at 23 °C was added triethylamine (2.28 mL, 3 equiv), 4-(dimethylamino)pyridine (74 mg, 0.10 equiv) and *N*-phenylbis(trifluoromethanesulfonimide) (2.87 g, 1.2 equiv) and reaction mixture was

stirred at 23 °C for 4 h and concentrated under reduced pressure. The residual was purification by flash chromatography on silica gel: (Eluent: 2% EtOAc /98% hexane), Appearance: white solid; isolated yield: (2.010 g, 90%). **<sup>1</sup>H NMR** (400 MHz, CDCl<sub>3</sub>) δ 7.94 (dd, *J* = 7.8, 1.6 Hz, 1H), 7.60 (d, *J* = 8.7 Hz, 2H), 7.54 (td, *J* = 7.5, 1.8 Hz, 1H), 7.38-7.34 (m, 2H), 7.11-7.05 (m, 2H), 5.53 (dd, *J* = 13.1, 3.1 Hz, 1H), 3.03 (dd, *J* = 16.8, 13.1 Hz, 1H), 2.92 (dd, *J* = 16.8, 3.2 Hz, 1H); **<sup>13</sup>C NMR** (100 MHz, CDCl<sub>3</sub>): δ 191.1, 161.1, 149.4, 139.3, 136.4, 128.0, 127.1, 122.0, 121.8, 120.9, 118.0, 78.4, 44.7.

**Step 2: Synthesis of 2-(4-(5,5-dimethyl-1,3,2-dioxaborinan-2-yl)phenyl)chroman-4-one:**

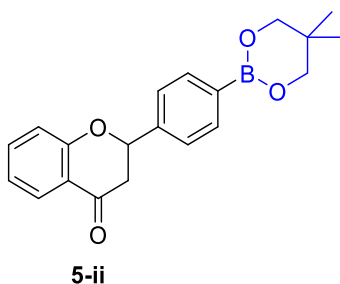

For the synthesis of compound of (**5-ii**), *same procedure was applied as adopted for conversion of (6-i) to (6-ii) with flavanone triflate (5-i)* (1.675 g, 4.5 mmol), bis(neopentyl glycolato)diboron (1.524 g, 6.75 mmol, 1.5 equiv), PdCl<sub>2</sub>(dppf).DCM (186 mg, 5 mol%), KOAc (1.324g, 13.5 mmol, 3 equiv.), and 1,4-dioxane (30 mL). The solution was stirred at 80 °C for 18 h. After workup and concentration of organic layer under reduced pressure, residual was purified by flash chromatography on silica gel: (Eluent: 6% EtOAc /94% hexane), Appearance: white solid; isolated yield: (1.120 g, 74%), m.p. 135-137 °C; **<sup>1</sup>H NMR** (400 MHz, CDCl<sub>3</sub>): 7.93 (dd, *J* = 7.6, 1.7 Hz, 1H), 7.87 (d, *J* = 8.1 Hz, 2H), 7.53-7.46 (m, 3H), 7.06 (t, *J* = 8.0 Hz, 2H), 5.50 (dd, *J* = 13.4, 2.8 Hz, 1H), 3.78 (s, 4H), 3.08 (dd, *J* = 16.8, 13.3 Hz, 1H), 2.89 (dd, *J* = 16.9, 3.0 Hz, 1H), 1.03 (s, 6H); **<sup>13</sup>C NMR** (100 MHz, CDCl<sub>3</sub>): δ 192.0, 161.6, 141.0, 136.2, 134.4, 127.0, 125.2, 121.6, 120.9, 118.2, 79.6, 72.3, 44.7, 31.9, 21.9; **HRMS** (ESI) Calcd for C<sub>20</sub>H<sub>21</sub>BO<sub>4</sub> [M + H]<sup>+</sup> 337.1642, found 337.1622

**Step 3: Synthesis of 2-(4-iodophenyl)chroman-4-one:**

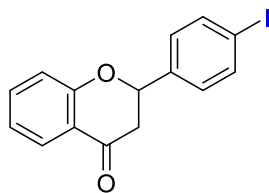

**5-iii**

The synthesis of 2-(4-iodophenyl)chroman-4-one (**5-iii**) was carried out using *same procedure was applied as adopted for conversion of (6-ii) to (6-iii) with flavanone borane derivative (5-ii)* ( 1.009 g, 3 mmol) in 1:1 THF: H<sub>2</sub>O (15 mL), NaI (0.675 g, 4.5 mmol, 1.5 equiv) in H<sub>2</sub>O (15 mL), Chloroamine-T.3H<sub>2</sub>O (2.113 g, 7.5 mmol, 2.5 equiv) dissolved in 1:1 THF: H<sub>2</sub>O (20 mL). The reaction mixture was stirred at 25 °C for 36 h. After workup and concentration of organic layer under reduced pressure, residual was purified by flash chromatography on silica gel: (Eluent: 4% EtOAc /96% hexane), Appearance: light yellow solid; isolated yield: (0.315 g, 30%), m.p. 116-118 °C; <sup>1</sup>H NMR (400 MHz, CDCl<sub>3</sub>): 7.93 (dd, *J* = 7.8, 1.6 Hz, 1H), 7.77 (dd, *J* = 9.0, 2.2 Hz, 2H), 7.52 (td, *J* = 7.4, 2.0 Hz, 1H), 7.24 (d, *J* = 8.3 Hz, 2H), 7.01-7.04 (m, 2H), 5.44 (dd, *J* = 13.0, 3.0 Hz, 1H), 3.03 (dd, *J* = 16.8, 13.1 Hz, 1H), 2.88 (dd, *J* = 16.8, 3.0 Hz, 1H); <sup>13</sup>C NMR (100 MHz, CDCl<sub>3</sub>): δ 191.5, 161.2, 138.4, 138.0, 136.3, 127.9, 127.1, 121.8, 120.8, 118.1, 94.4, 78.9, 44.5; HRMS (ESI) Calcd for C<sub>15</sub>H<sub>11</sub>IO<sub>2</sub> [M + H]<sup>+</sup> 350.9876, found 350.9876

#### Step 4: Synthesis of 3-(4-(4-oxochroman-2-yl)phenyl)propanal

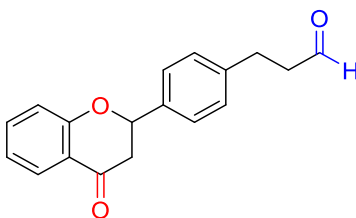

**5a**

Substrate (**5a**) was prepared using the *general procedure (C)* with compound **5-iii** (0.315 g, 0.9 mmol), Pd(OAc)<sub>2</sub> (20 mg, 10 mol%), lithium acetate (148 mg, 2.5 equiv.), lithium chloride (37 mg, 1equiv.), tetrabutylammonium chloride (0.500 g, 2 equiv.), allyl alcohol (131 μL, 2.0 equiv), DMA (5 mL) and then reaction mixture was stirred at 50 °C for 5 h. After workup, concentration and purification by flash chromatography on silica gel: (Eluent: 12% EtOAc /88% hexane), Appearance: yellow solid; isolated yield: (0.100 mg, 40%), m.p. 105-107°C; <sup>1</sup>H NMR (400 MHz,

CDCl<sub>3</sub>): 9.83 (s, 1H), 7.93 (dd, *J* = 8.1, 1.5 Hz, 1H), 7.51 (td, *J* = 7.9, 2.0 Hz, 1H), 7.45 (d, *J* = 8.1 Hz, 2H), 7.27 (d, *J* = 8.1 Hz, 2H), 7.06 (t, *J* = 8.1 Hz, 2H), 5.46 (dd, *J* = 13.3, 2.8 Hz, 1H), 3.09 (dd, *J* = 16.8, 13.2 Hz, 1H), 2.99 (t, *J* = 7.6 Hz, 2H), 2.88 (dd, *J* = 16.7, 2.9 Hz, 1H), 2.81 (t, *J* = 7.5 Hz, 2H); <sup>13</sup>C NMR (100 MHz, CDCl<sub>3</sub>): δ 201.2, 191.9, 161.5, 141.1, 136.7, 136.2, 128.9, 128.8, 127.0, 126.5, 121.6, 120.9, 118.1, 79.4, 45.1, 44.5, 27.7; HRMS (ESI) Calcd for C<sub>18</sub>H<sub>16</sub>O<sub>3</sub>[M + H]<sup>+</sup> 281.1173, found 281.1172.

### Synthesis of 3-(4-((4-methyl-2-oxo-2H-chromen-7-yl)oxy)phenyl)propanal (7a)

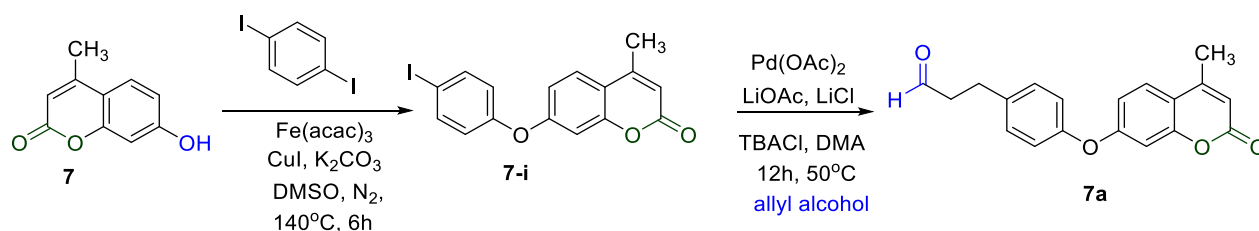

#### Step 1: Synthesis of 7-(4-iodophenoxy)-4-methyl-2H-chromen-2-one (7-i)<sup>16</sup>

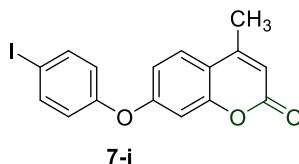

A mixture of 1,4-diiodobenzene (1.64 g, 5 mmol), coumarin 7 (1.057 g, 6 mmol), Fe(acac)<sub>3</sub> (353 mg, 20 mol %), CuI (190 mg, 20 mol %), K<sub>2</sub>CO<sub>3</sub> (1.38 g, 2 equiv.), and DMSO (20 mL) in a Schlenk tube was stirred under nitrogen atmosphere at 120 °C for 6 h. After the completion of reaction, the mixture was poured into ethyl acetate, then washed with water, extracted with additional ethyl acetate, dried over anhydrous Na<sub>2</sub>SO<sub>4</sub>, then filtered and evaporated under vacuum, the residue was purified by flash column chromatography on silica gel: (Eluent: 11% EtOAc /89% hexane), Appearance: light yellow solid; isolated yield: (1.039 g, 55%), m.p. 126-128 °C; <sup>1</sup>H NMR (400 MHz, CDCl<sub>3</sub>): <sup>1</sup>H NMR (400 MHz, CDCl<sub>3</sub>): δ 7.68 (d, *J* = 8.7 Hz, 2H), 7.55 (d, *J* = 8.7 Hz, 1H), 6.92 (dd, *J* = 8.7, 2.4 Hz, 1H), 6.84 (dd, *J* = 5.7, 3.1 Hz, 3H), 6.17 (s, 1H), 2.41 (s, 1H); <sup>13</sup>C NMR (100 MHz, CDCl<sub>3</sub>): δ 160.4, 160.0, 155.2, 154.7, 152.0, 138.9, 125.9, 121.9, 115.4, 114.2, 113.0, 105.6, 88.0 and 18.6; HRMS (ESI) Calcd for C<sub>16</sub>H<sub>11</sub>IO<sub>3</sub> [M + H]<sup>+</sup> 378.9826, found 378.9827.

## Step 2: Synthesis of 3-(4-((4-methyl-2-oxo-2H-chromen-7-yl)oxy)phenyl)propanal (7a):

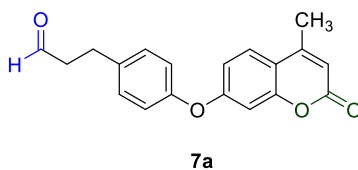

Substrate (**7a**) was prepared using the *general procedure (C)*. The 150 mL Schlenk tube was charged with compound **7-i** (0.378 g, 1.0 mmol), Pd(OAc)<sub>2</sub> (23 mg, 10 mol%), lithium acetate (165 mg, 2.5 equiv.), lithium chloride (42 mg, 1 equiv.), tetrabutylammonium chloride (559 mg, 2 equiv.), allyl alcohol (145 μL, 2.0 equiv.), DMA (15 mL) and then reaction mixture was stirred at 50 °C for 5 h. After workup, concentration and purification by flash chromatography on silica gel: (Eluent: 14% EtOAc /86% hexane), Appearance: viscous oil; isolated yield: (0.157 g, 51%); m.p. 98-100 °C; <sup>1</sup>H NMR (400 MHz, CDCl<sub>3</sub>): δ 9.85 (s, 1H), 7.53 (d, *J* = 8.8 Hz, 1H), 7.24 (d, *J* = 8.5 Hz, 2H), 7.01 (d, *J* = 8.5 Hz, 2H), 6.93 (dd, *J* = 8.8, 2.4 Hz, 1H), 6.82 (d, *J* = 2.4 Hz, 1H), 6.18 (s, 1H), 2.98 (t, *J* = 7.4 Hz, 2H), 2.82 (t, *J* = 7.4 Hz, 2H), 2.41 (d, *J* = 1.1 Hz, 3H); <sup>13</sup>C NMR (100 MHz, CDCl<sub>3</sub>): δ 201.2, 161.2, 160.9, 155.0, 153.5, 152.2, 137.2, 130.0, 125.8, 120.4, 115.0, 114.1, 112.8, 105.1, 45.3, 27.4 and 18.7; HRMS (ESI) Calcd for C<sub>19</sub>H<sub>16</sub>O<sub>4</sub> [M + H]<sup>+</sup> 309.1121, found 309.1122

## Synthesis of (8R,9S,10S,13R,14S,17R)-10,13-dimethyl-17-((R)-6-methylheptan-2-yl)hexadecahydro-1H-cyclopenta[a]phenanthren-3-yl 4-(3-oxopropyl)benzoate (**9a**)

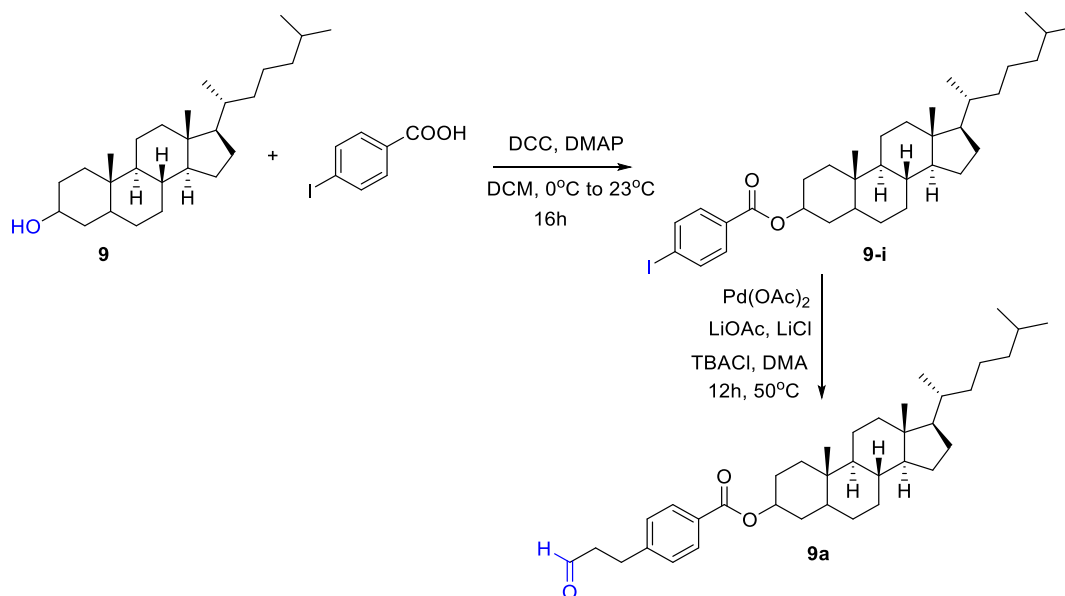

**Step 1: Synthesis of (8R,9S,10S,13R,14S,17R)-10,13-dimethyl-17-((R)-6-methylheptan-2-yl)hexadecahydro-1H-cyclopenta[a]phenanthren-3-yl 4-iodobenzoate (9-i)<sup>17a</sup>**

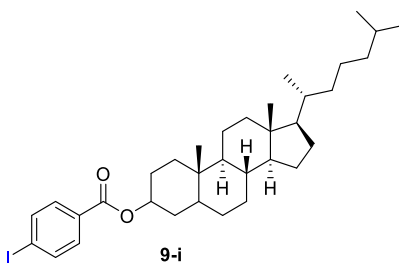

To a stirred solution of  $\beta$ -Cholesterol (1.16 g, 3 mmol) and 4-iodobenzoic acid (1.860 g, 2.5 equiv.) in DCM (20 mL) at 0 °C were added DCC (1.547 g, 2.5 equiv.) and DMAP (0.183 g, 0.5 equiv.) sequentially. After 30 minutes, the ice-cold water-cooling bath was removed and the resulting suspension was stirred vigorously at room temperature for 16 h. Then, reaction mixture was concentration in *vacuo*. The reaction mixture was purification by flash chromatography on silica gel: (Eluent: 1% EtOAc /99% hexane), Appearance: white solid; isolated yield: (0.650 g, 35%), m.p. 183-185 °C; <sup>1</sup>H NMR (400 MHz, CDCl<sub>3</sub>): 7.78 (d, *J* = 8.5 Hz, 2H), 7.73 (d, *J* = 8.5 Hz, 2H), 4.96-4.88 (m, 1H), 1.99-1.91 (m, 2H), 1.84-1.75 (m, 2H), 1.73-1.61 (m, 3H), 1.58-1.48 (m, 4H), 1.38-1.22 (m, 10H), 1.15-1.07 (m, 6H), 1.04-0.97 (m, 3H), 0.91-0.85 (m, 13H), 0.65 (s, 3H); <sup>13</sup>C NMR (100 MHz, CDCl<sub>3</sub>):  $\delta$  165.6, 137.5, 130.9, 130.4, 100.3, 74.7, 56.4, 56.23, 54.23, 44.7, 42.6, 39.9, 39.5, 36.7, 36.1, 35.8, 35.5, 35.4, 34.0, 31.9, 28.6, 28.2, 27.9, 27.5, 24.2, 23.8, 22.8, 22.5, 21.2, 18.6, 12.3, 12.1; HRMS (ESI) Calcd for C<sub>34</sub>H<sub>51</sub>IO<sub>2</sub> [M + H]<sup>+</sup> 619.2935, found 619.2940

**Step 2: Synthesis of (8R,9S,10S,13R,14S,17R)-10,13-dimethyl-17-((R)-6-methylheptan-2-yl)hexadecahydro-1H-cyclopenta[a]phenanthren-3-yl 4-(3-oxopropyl)benzoate (9a)**

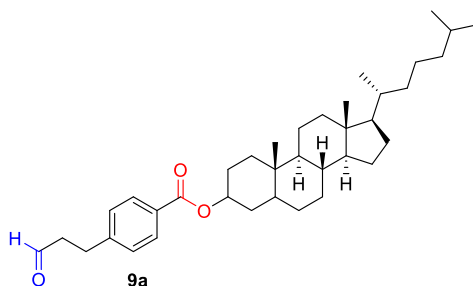

Substrate (**9a**) was prepared using the *general procedure (C)*. The 150 mL Schlenk tube was charged with compound **9-i** (0.619 g, 1.0 mmol), Pd(OAc)<sub>2</sub> (23 mg, 10 mol%), lithium acetate (165 mg, 2.5 equiv.), lithium chloride (42 mg, 1equiv.), tetrabutylammonium chloride (559 mg, 2

equiv.), allyl alcohol (145  $\mu$ L, 2.0 equiv.), DMA (15 mL) and then reaction mixture was stirred at 50  $^{\circ}$ C for 5 h. After workup, concentration and purification by flash chromatography on silica gel: (Eluent: 2% EtOAc /98% hexane), Appearance: white solid; isolated yield: (0.313 g, 57%), m.p. 120-123  $^{\circ}$ C;  $^1\text{H NMR}$  (400 MHz,  $\text{CDCl}_3$ ): 9.82 (s, 1H), 7.96 (d,  $J = 8.3$  Hz, 2H), 7.25 (d,  $J = 8.3$  Hz, 2H), 4.97-4.88 (m, 1H), 3.00 (t,  $J = 7.4$  Hz, 2H), 2.81 (t,  $J = 7.4$  Hz, 2H), 1.98-1.92 (m, 2H), 1.82-1.64 (m, 5H), 1.61-1.48 (m, 4H), 1.37-1.26 (m, 10H), 1.15-0.98 (m, 9H), 0.91-0.85 (m, 13H), 0.66 (s, 3H);  $^{13}\text{C NMR}$  (100 MHz,  $\text{CDCl}_3$ ):  $\delta$  200.8, 166.0, 145.5, 129.9, 129.1, 128.2, 74.3, 56.4, 56.23, 54.20, 44.9, 44.7, 42.6, 39.9, 39.5, 36.8, 36.1, 35.8, 35.5, 35.4, 34.1, 31.9, 28.6, 28.2, 27.9, 27.5, 24.2, 23.8, 22.8, 22.6, 22.5, 21.2, 18.6, 12.3, 12.1; **HRMS** (ESI) Calcd for  $\text{C}_{37}\text{H}_{56}\text{O}_3$  [ $\text{M} + \text{H}$ ] $^+$  549.4203, found 549.4205

**Synthesis of (8R,9S,10S,13S,14S)-10,13-dimethyl-17-oxohexadecahydro-1H-cyclopenta[a]phenanthren-3-yl 4-(3-oxopropyl)benzoate (10a)**

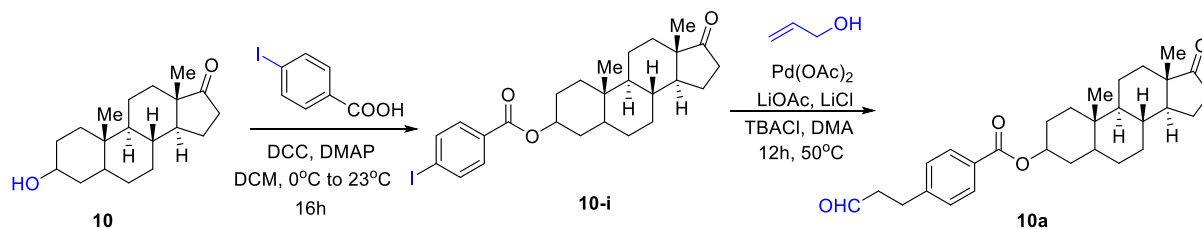

**Step 1: Synthesis of (8R,9S,10S,13S,14S)-10,13-dimethyl-17-oxohexadecahydro-1H-cyclopenta[a]phenanthren-3-yl 4-iodobenzoate (10-i):**

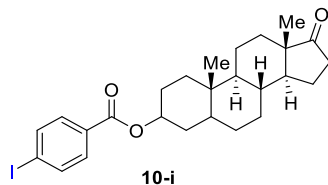

The synthesis of compound (10-i) was carried out *with androsterone* (10) (0.871 g, 3 mmol) and 4-iodobenzoic acid (0.620 g, 2.5 mmol) using *same procedure as adopted for conversion of (9) to (9-i)*. After the completion of reaction followed by workup and purification by flash chromatography on silica gel: (Eluent: 10% EtOAc /90% hexane), provided 10-i as a gummy viscous oil in (0.780 g, 50%) yield.  $^1\text{H NMR}$  (400 MHz,  $\text{CDCl}_3$ ):  $\delta$  7.81 (d,  $J = 8.5$  Hz, 2H), 7.75 (d,  $J = 8.5$  Hz, 2H), 5.27 (s, 1H), 2.45 (dd,  $J = 19.3, 8.6$  Hz, 1H), 2.12-2.02 (m, 1H), 1.97-1.75 (m,



5H), 1.71-1.67 (m, 1H), 1.63-1.48 (m, 6H), 1.38-1.23 (m, 7H), 1.08-0.98 (m, 1H), 0.88 (s, 3H), 0.87 (s, 3H);  $^{13}\text{C}$  NMR (100 MHz,  $\text{CDCl}_3$ ):  $\delta$  221.2, 165.3, 137.7, 131.0, 130.5, 100.4, 70.9, 54.4, 51.4, 47.8, 40.5, 36.0, 35.8, 35.0, 33.1, 32.8, 31.5, 30.7, 28.0, 26.2, 21.7, 20.1, 13.8, 11.4; **HRMS** (ESI) Calcd for  $\text{C}_{26}\text{H}_{33}\text{IO}_3$   $[\text{M} + \text{H}]^+$  521.1434, found 521.1433

**Synthesis of (8R,9S,10S,13S,14S)-10,13-dimethyl-17-oxohexadecahydro-1H-cyclopenta[a]phenanthren-3-yl 4-(3-oxopropyl)benzoate (10a)**

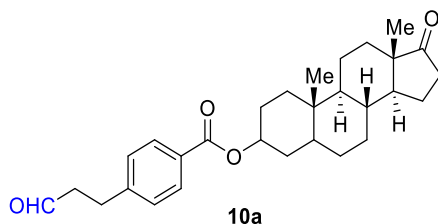

Substrate (**10a**) was prepared using the *general procedure (C)*. The 50 mL Schlenk tube was charged with compound **10-i** (0.625 g, 1.2 mmol),  $\text{Pd}(\text{OAc})_2$  (27 mg, 10 mol%), lithium acetate (198 mg, 2.5 equiv.), lithium chloride (50 mg, 1equiv.), tetrabutylammonium chloride (667 mg, 2 equiv.), allyl alcohol (174  $\mu\text{L}$ , 2.0 equiv.), DMA (10 mL) and then reaction mixture was stirred at  $50^\circ\text{C}$  for 5 h. After workup, concentration and purification by flash chromatography on silica gel: (Eluent: 13% EtOAc /87% hexane), Appearance: viscous oil; (0.243g, 45%) isolated yield;  $^1\text{H}$  NMR (400 MHz,  $\text{CDCl}_3$ ):  $\delta$  9.83 (s, 1H), 7.98 (d,  $J = 8.2$  Hz, 2H), 7.28 (d,  $J = 8.2$  Hz, 2H), 5.27 (s, 1H), 3.02 (t,  $J = 7.5$  Hz, 2H), 2.82 (t,  $J = 7.5$  Hz, 2H), 2.46 (dd,  $J = 19.3, 8.6$  Hz, 1H), 2.12-2.03 (m, 1H), 1.98-1.78 (m, 4H), 1.77-1.71 (m, 2H), 1.64 -1.47 (m, 6H), 1.41-1.23 (m, 7H), 1.09-0.98 (m, 1H), 0.88 (d,  $J = 2.4$  Hz, 6H);  $^{13}\text{C}$  NMR (100 MHz,  $\text{CDCl}_3$ ):  $\delta$  221.3, 200.8, 165.7, 145.6, 129.8, 129.2, 128.3, 70.4, 54.4, 51.4, 47.8, 40.4, 36.0, 35.8, 35.0, 33.1, 32.9, 31.5, 30.7, 28.0, 26.2, 21.7, 20.1, 13.8 and 11.4; **HRMS** (ESI) Calcd for  $\text{C}_{29}\text{H}_{38}\text{O}_4$   $[\text{M} + \text{H}]^+$  451.2843, found 451.2843

**Synthesis of 4-(3-oxopropyl)phenyl 2-(4-(4-chlorobenzoyl)phenoxy)-2-methylpropanoate (11a):**

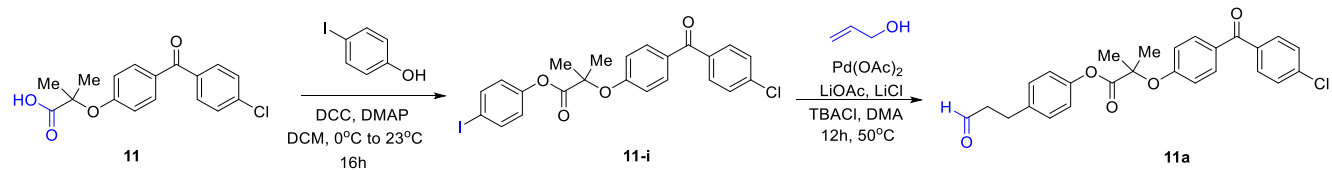

### Step 1: Synthesis of 4-iodophenyl 2-(4-(4-chlorobenzoyl)phenoxy)-2-methylpropanoate (**11-i**)

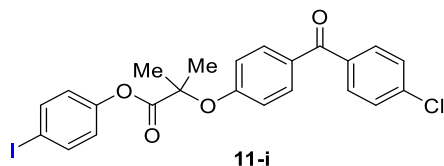

The synthesis of compound (**11-i**) was carried with and 4-iodophenol (0.660 g, 3 mmol) and fenofibric acid (**11**) (0.797 g, 2.5 mmol) using *same procedure as adopted for conversion of (9) to (9-i)*. After the completion of reaction followed by workup and purification by flash chromatography on silica gel: (Eluent: 5% EtOAc /95% hexane), provided **11-i** as a white solid in (1.0154 g, 65%) yield, m.p. 151-153 °C; <sup>1</sup>H NMR (400 MHz, CDCl<sub>3</sub>): δ 7.79 (d, *J* = 8.8 Hz, 2H), 7.71 (d, *J* = 8.5 Hz, 2H), 7.66 (d, *J* = 8.8 Hz, 2H), 7.45 (d, *J* = 8.8 Hz, 2H), 6.97 (d, *J* = 8.8 Hz, 2H), 6.76 (d, *J* = 8.8 Hz, 2H), 1.81 (s, 6H); <sup>13</sup>C NMR (100 MHz, CDCl<sub>3</sub>): δ 194.1, 172.1, 159.3, 150.2, 138.6, 138.4, 136.2, 132.1 131.1, 130.7, 128.5, 123.3, 117.2, 90.3, 79.4 and 25.4; HRMS (ESI) Calcd for C<sub>23</sub>H<sub>18</sub>ClIO<sub>4</sub> [M + H]<sup>+</sup> 521.0011, found 521.0011

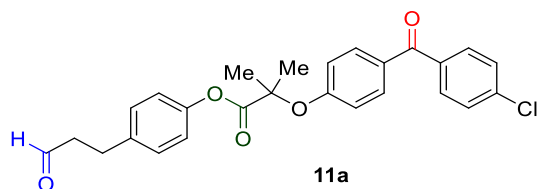

Substrate (**11a**) was prepared using the *general procedure (C)*. The 50 mL Schlenk tube was charged with compound **11-i** (0.625 g, 1.2 mmol), Pd(OAc)<sub>2</sub> (27 mg, 10 mol%), lithium acetate (198 mg, 2.5 equiv.), lithium chloride (50 mg, 1equiv.), tetrabutylammonium chloride (667 mg, 2 equiv.), allyl alcohol (174 μL, 2.0 equiv.), DMA (10 mL) and then reaction mixture was stirred at 50 °C for 5 h. After workup, concentration and purification by flash chromatography on silica gel: (Eluent: 8% EtOAc /92% hexane), Appearance: white solid; (0.276 g, 51%) isolated yield; m.p. 99-101 °C; <sup>1</sup>H NMR (400 MHz, CDCl<sub>3</sub>): δ 9.79 (s, 1H), 7.79 (d, *J* = 8.5 Hz, 2H), 7.72 (d, *J* = 8.5

Hz, 2H), 7.45 (d,  $J = 8.5$  Hz, 2H), 7.18 (d,  $J = 8.5$  Hz, 2H), 6.99 (d,  $J = 8.8$  Hz, 2H), 6.91 (d,  $J = 8.5$  Hz, 2H), 2.93 (t,  $J = 7.3$  Hz, 2H), 2.76 (t,  $J = 7.5$  Hz, 2H), 1.82 (s, 6H);  $^{13}\text{C NMR}$  (100 MHz,  $\text{CDCl}_3$ ):  $\delta$  201.0, 194.1, 172.4, 159.5, 148.7, 138.42, 138.37, 136.2, 132.1, 131.1, 130.6, 129.3, 128.5, 121.1, 117.3, 79.4, 45.1, 27.3 and 25.4; **HRMS** (ESI) Calcd for  $\text{C}_{26}\text{H}_{23}\text{ClO}_5$   $[\text{M} + \text{H}]^+$  451.1307, found 451.1306

### Synthesis of (E)-3-(4-(3-(4-methoxyphenyl)-3-oxoprop-1-en-1-yl)phenyl)propanal (**8a**):

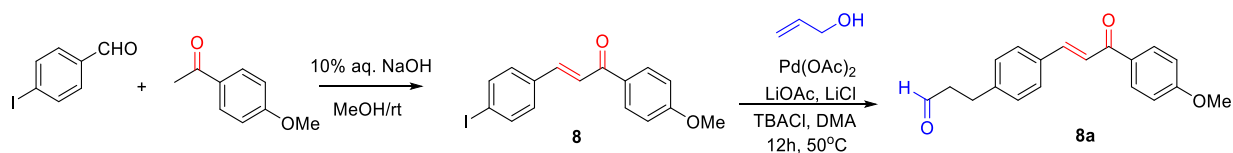

Substrate (**8a**) was prepared using the *general procedure (C)*. The 50 mL Schlenk tube was charged with compound **8** (0.437 g, 1.2 mmol), Pd(OAc)<sub>2</sub> (27 mg, 10 mol%), lithium acetate (198 mg, 2.5 equiv.), lithium chloride (50 mg, 1equiv.), tetrabutylammonium chloride (667 mg, 2 equiv.), allyl alcohol (174  $\mu\text{L}$ , 2.0 equiv.), DMA (10 mL) and then reaction mixture was stirred at 50 °C for 5 h. After workup, concentration and purification by flash chromatography on silica gel: (Eluent: 15% EtOAc /85% hexane), Appearance: light yellow solid; (0.201g, 57%) isolated yield; m.p. 88-91 °C;  $^1\text{H NMR}$  (400 MHz,  $\text{CDCl}_3$ ):  $\delta$  9.83 (s, 1H), 8.03 (d,  $J = 9.0$  Hz, 2H), 7.77 (d,  $J = 15.6$  Hz, 1H), 7.57 (d,  $J = 8.2$  Hz, 2H), 7.51 (d,  $J = 15.6$  Hz, 1H), 7.25 (d,  $J = 8.1$  Hz, 2H), 6.98 (d,  $J = 8.9$  Hz, 2H), 3.89 (s, 3H), 2.99 (t,  $J = 7.5$  Hz, 2H), 2.85 – 2.76 (7.5, 2H);  $^{13}\text{C NMR}$  (100 MHz,  $\text{CDCl}_3$ ):  $\delta$  201.0, 188.7, 163.4, 143.6, 143.0, 133.2, 131.1, 130.8, 128.9, 128.6, 121.4, 113.8, 55.5, 44.9, 27.9; **HRMS** (ESI) Calcd for  $\text{C}_{19}\text{H}_{18}\text{O}_3$   $[\text{M} + \text{H}]^+$  295.3501, found 295.3500

## Selected results from optimization studies of the olefination of dual remote C-H bonds of $\beta$ -phenyl propionaldehyde **1a** with ethyl acrylates **2a**

**Table S1: Selected optimization studies**<sup>a</sup>

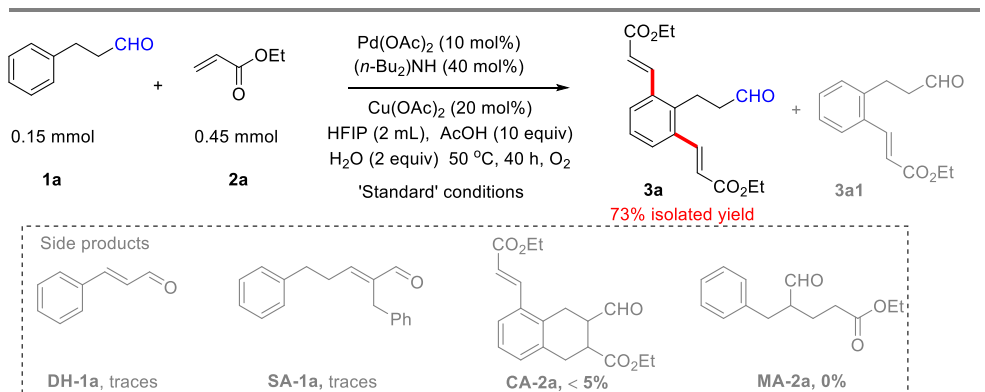

| Entry | Deviation from 'standard' conditions                                                               | Yield [%] of 3a and 3a' (Di : Mono) <sup>b</sup> |
|-------|----------------------------------------------------------------------------------------------------|--------------------------------------------------|
| 1     | none                                                                                               | 79% (19:1)                                       |
| 2     | without Pd(OAc) <sub>2</sub>                                                                       | 0                                                |
| 3     | without (n-Bu) <sub>2</sub> NH                                                                     | 0                                                |
| 4     | without Cu(OAc) <sub>2</sub>                                                                       | 5                                                |
| 5     | under N <sub>2</sub> atm                                                                           | 26                                               |
| 6     | under open air                                                                                     | 54 (2:1)                                         |
| 7     | without AcOH                                                                                       | 10                                               |
| 8     | without H <sub>2</sub> O                                                                           | 71 (12:1)                                        |
| 9     | Pd(OAc) <sub>2</sub> / AgOAc instead of Pd(OAc) <sub>2</sub> / Cu(OAc) <sub>2</sub>                | 14 <sup>c,d</sup>                                |
| 10    | Pd(TFA) <sub>2</sub> / Cu(OAc) <sub>2</sub> instead of Pd(OAc) <sub>2</sub> / Cu(OAc) <sub>2</sub> | 54 (5:1)                                         |
| 11    | Cu(OAc) <sub>2</sub> 50 mol% instead of 20 mol%                                                    | 61 (14:1)                                        |
| 12    | 40 °C                                                                                              | 76 (15:1) <sup>e</sup>                           |
| 13    | 70 °C                                                                                              | 20 <sup>f</sup>                                  |
| 14    | 40 mol% amine <b>A1-A15</b> was used                                                               | listed below                                     |
| 15    | <b>S1-S6</b> solvents instead of HFIP(2 mL)                                                        | listed below                                     |
| 16    | 10 equiv of acid <b>B1-B4</b> instead of AcOH                                                      | listed below                                     |

  

|                                                         |                           |                         |                        |                                |                                 |
|---------------------------------------------------------|---------------------------|-------------------------|------------------------|--------------------------------|---------------------------------|
|                                                         |                           |                         |                        |                                |                                 |
| R = C <sub>2</sub> H <sub>5</sub> <b>A1</b> , 48% (2:1) | <b>A7</b> , 0%            | <b>A8</b> , 0%          | <b>A9</b> , 0%         | <b>A10</b> , 11%               | <b>A11</b> , 56% (2:1)          |
| R = C <sub>3</sub> H <sub>7</sub> <b>A2</b> , 75% (8:1) |                           |                         |                        |                                |                                 |
| R = isobutyl <b>A3</b> , 64% (5:1)                      |                           |                         |                        |                                |                                 |
| R = isopentyl <b>A4</b> , 75% (12:1)                    |                           |                         |                        |                                |                                 |
| R = Cy <b>A5</b> , 12%                                  | R = benzyl <b>A6</b> , 0% | <b>A12</b> , 72% (18:1) | <b>A13</b> , 50% (7:1) | <b>A14</b> , 9%                | <b>A15</b> , 8%                 |
| AcOH                                                    | TFE                       | HFIP:DCE                | DCE                    | <i>t</i> -amyl-OH <sup>g</sup> | Ph-CF <sub>3</sub> <sup>h</sup> |
| <b>S1</b> , 0%                                          | <b>S2</b> , 30%           | <b>S3</b> , 33%         | <b>S4</b> , 0%         | <b>S5</b> , 0%                 | <b>S6</b> , 0%                  |
| TFA                                                     | PivOH                     | propionic acid          | isobutyric acid        |                                |                                 |
| <b>B1</b> , 0%                                          | <b>B2</b> , 0%            | <b>B3</b> , 60% (9:1)   | <b>B4</b> , 30%        |                                |                                 |

<sup>a</sup> Unless otherwise noted, all reactions were run with **1a** (0.15 mmol) and **2a** (0.45 mmol) in 2 mL solvent for 40 h.

<sup>b</sup> Yields & ratio were determined by <sup>1</sup>H NMR spectroscopy using CH<sub>2</sub>Br<sub>2</sub> as an internal standard, <sup>c</sup> 2 equiv. AgOAc,

<sup>d</sup> DH-1a was observed in 5% yield, <sup>e</sup> 72 h, <sup>f</sup> CA-2a was observed in 15% yield, <sup>g</sup> SA-1a was observed in 18% yield.

<sup>h</sup> DH-1a was observed in 30% yield, abbreviation: DH = dehydrogenation product, SA = self Aldol product, CA = cyclic aldehyde product, MA = Michael addition product

## General procedure for olefination of dual remote C-H bonds

**General procedure (E):** In glove box, a 37 mL Schlenk tube was equipped with a magnetic stir bar was charged with  $\beta$ -aryl saturated aldehyde derivative (0.15 mmol), Pd(OAc)<sub>2</sub> (3.5 mg, 10 mol%), Cu(OAc)<sub>2</sub> (5.5 mg, 20 mol%). The tube was fitted with a rubber septum and moved out of the glove box. Then acrylate derivative (0.45 mmol, 3 equiv.), HFIP (2 mL), AcOH (80  $\mu$ L, 10 equiv.), H<sub>2</sub>O (5.5  $\mu$ L, 2 equiv.) and dibutylamine (*n*-Bu)<sub>2</sub>NH (10  $\mu$ L, 40 mol %) or (*n*-Pr)<sub>2</sub>NH (9  $\mu$ L, 40 mol %, see tables 3) were added to the Schlenk tube through the rubber septum using syringes. The tube was evacuated and filled with O<sub>2</sub> with three times and then the septum was replaced with a Teflon screwcap under O<sub>2</sub> flow. The reaction mixture was stirred at room temperature for 10 min., then at 50 °C for 40 h (or at 40 °C for 72 h, see tables 2 and 3). After cooling to ambient temperature, the reaction mixture was diluted with 10 mL of DCM and filtered through a pad of silica gel and washed with additional 10 mL of ethyl acetate. The organic layer was concentrated in *vacuo* and purified by flash column chromatography using silica gel; Eluent: (EtOAc /hexane). The ratio of di and mono (D:M) olefinated product were determined by <sup>1</sup>H NMR of the crude reaction mixture using dibromometanne as internal standard with respect to benzylic methylene proton signals, which appear as triplet (approximately 3.10 to 3.30 ppm, respectively).

## Experimental data for evaluating substrate scope for dual olefination of remote C-H bonds

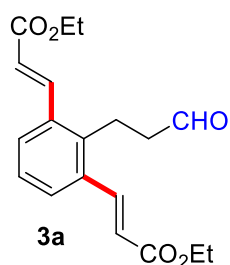

**diethyl 3,3'-(2-(3-oxopropyl)-1,3-phenylene)(2E,2'E)-diacrylate (**3a**):** Olefination was done by *general procedure (E)* with 3-phenylpropanal (0.0201 g, 0.15 mmol) as the substrate and ethyl acrylate (50  $\mu$ L, 3 equiv., 0.45 mmol) as olefin partner. The crude product was purified via using flash chromatography; Eluent: (15% EtOAc /75% hexane); Appearance: off white solid; isolated yield: 73%; m.p. 87-89 °C; <sup>1</sup>H NMR (400 MHz, CDCl<sub>3</sub>):  $\delta$  9.80 (s, 1H), 7.98 (d, *J* = 15.7 Hz, 2H), 7.56 (d, *J* = 7.8 Hz, 2H), 7.28 (t, *J* = 7.7 Hz, 1H), 6.35 (d, *J* = 15.7 Hz, 2H), 4.28 (q, *J* = 7.2 Hz, 4H), 3.21 (t, *J* = 8.2 Hz, 2H), 2.66 (t, *J* = 8.2 Hz, 2H), 1.35 (t, *J* = 7.2 Hz, 6H); <sup>13</sup>C NMR (100

MHz, CDCl<sub>3</sub>):  $\delta$  199.9, 166.4, 141.4, 138.7, 134.5, 128.7, 127.2, 121.8, 60.7, 44.6, 21.3, 14.3; **IR** (KBr): 2985, 1714, 1627, 1477, 1177, 1026, 985, 970, 792 cm<sup>-1</sup>; **HRMS** (ESI) Calcd for C<sub>19</sub>H<sub>22</sub>O<sub>5</sub> [M + H]<sup>+</sup> 331.1540, found 331.1536

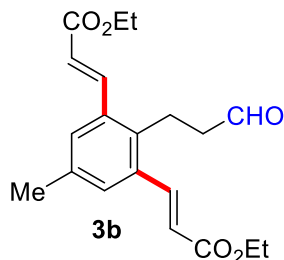

**diethyl 3,3'-(5-methyl-2-(3-oxopropyl)-1,3-phenylene)(2E,2'E)-diacrylate (3b):** Olefination was done by *general procedure (E)* with 3-(p-tolyl)propanal (0.0222g, 0.15 mmol) as the substrate and ethyl acrylate (50  $\mu$ L, 3 equiv., 0.45 mmol) as olefin partner. The crude product was purified via using flash chromatography; Eluent: (10% EtOAc /80% hexane); Appearance: off white solid; isolated yield: 68%; m.p. 145-146 °C; **<sup>1</sup>H NMR** (400 MHz, CDCl<sub>3</sub>):  $\delta$  9.79 (s, 1H), 7.96 (d,  $J$  = 15.7 Hz, 2H), 7.39 (s, 2H), 6.34 (d,  $J$  = 15.7 Hz, 2H), 4.27 (q,  $J$  = 7.1 Hz, 4H), 3.17 (t,  $J$  = 8.2 Hz, 2H), 2.63 (t,  $J$  = 8.2 Hz, 2H), 2.35 (s, 3H), 1.34 (t,  $J$  = 7.2 Hz, 6H); **<sup>13</sup>C NMR** (100 MHz, CDCl<sub>3</sub>):  $\delta$  200.0, 166.4, 141.5, 136.7, 135.9, 134.2, 129.3, 121.4, 60.6, 44.7, 20.86, 20.83, 14.2; **IR** (KBr): 2982, 1714, 1630, 1477, 1182, 1036, 976, 857 cm<sup>-1</sup>; **HRMS** (ESI) Calcd for C<sub>20</sub>H<sub>24</sub>O<sub>5</sub> [M + H]<sup>+</sup> 345.1697, found 345.1692

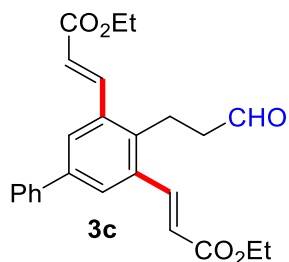

**diethyl 3,3'-(4-(3-oxopropyl)-[1,1'-biphenyl]-3,5-diyl)(2E,2'E)-diacrylate (3c):** Olefination was done by *general procedure (E)* with 3-([1,1'-biphenyl]-4-yl)propanal (0.0315 g, 0.15 mmol) as the substrate and ethyl acrylate (50  $\mu$ L, 3 equiv., 0.45 mmol) as olefin partner. The crude product was purified via using flash chromatography; Eluent: (12% EtOAc /86% hexane); Appearance: off white solid; isolated yield: 70%; m.p. 136-138 °C; **<sup>1</sup>H NMR** (400 MHz, CDCl<sub>3</sub>):  $\delta$  9.82 (s, 1H), 8.04 (d,  $J$  = 15.7 Hz, 2H), 7.76 (s, 2H), 7.60 (d,  $J$  = 7.3 Hz, 2H), 7.49 (t,  $J$  = 7.2

Hz, 2H), 7.41 (d,  $J = 7.3$  Hz, 1H), 6.43 (d,  $J = 15.7$  Hz, 2H), 4.28 (q,  $J = 7.1$  Hz, 4H), 3.24 (t,  $J = 8.2$  Hz, 2H), 2.70 (t,  $J = 8.2$  Hz, 2H), 1.35 (t,  $J = 7.2$  Hz, 6H);  $^{13}\text{C NMR}$  (100 MHz,  $\text{CDCl}_3$ ):  $\delta$  199.9, 166.4, 141.5, 140.2, 139.5, 137.6, 135.0, 128.9, 128.0, 127.3, 127.0, 122.1, 60.7, 44.6, 21.1, 14.3; **IR** (KBr): 2978, 2931, 1709, 1632, 1447, 1366, 1280, 1179, 1034, 976, 858, 765, 699  $\text{cm}^{-1}$ ; **HRMS** (ESI) Calcd for  $\text{C}_{25}\text{H}_{26}\text{O}_5$   $[\text{M} + \text{H}]^+$  407.1853, found 407.1850

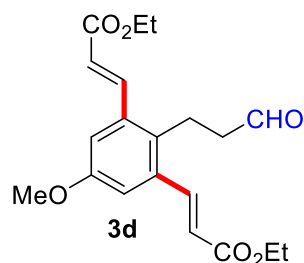

**Diethyl 3,3'-(5-methoxy-2-(3-oxopropyl)-1,3-phenylene)(2E,2'E)-diacrylate (3d):** Olefination was done by *general procedure (E)* with 3-(4-methoxyphenyl)propanal (0.0246 g, 0.15 mmol) as the substrate and ethyl acrylate (50  $\mu\text{L}$ , 3 equiv., 0.45 mmol) as olefin partner. The crude product was purified via using flash chromatography; Eluent: (16% EtOAc /84% hexane); Appearance: off white solid; isolated yield: 61%; m.p. 134-136  $^{\circ}\text{C}$ ;  $^1\text{H NMR}$  (400 MHz,  $\text{CDCl}_3$ ):  $\delta$  9.79 (s, 1H), 7.95 (d,  $J = 15.7$  Hz, 2H), 7.09 (s, 2H), 6.34 (d,  $J = 15.7$  Hz, 2H), 4.28 (q,  $J = 7.1$  Hz, 4H), 3.84 (s, 3H), 3.14 (t,  $J = 8.2$  Hz, 2H), 2.62 (t,  $J = 8.2$  Hz, 2H), 1.35 (t,  $J = 7.2$  Hz, 6H);  $^{13}\text{C NMR}$  (100 MHz,  $\text{CDCl}_3$ ):  $\delta$  200.1, 166.3, 158.1, 141.5, 135.5, 131.2, 121.8, 113.9, 60.7, 55.3, 44.9, 20.6, 14.2; **IR** (KBr): 2982, 1714, 1630, 1458, 1285, 1272, 1180, 1035, 975, 869, 842  $\text{cm}^{-1}$ ; **HRMS** (ESI) Calcd for  $\text{C}_{20}\text{H}_{24}\text{O}_6$   $[\text{M} + \text{H}]^+$  361.1646, found 361.1643

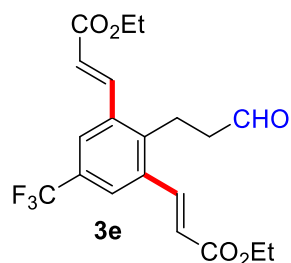

**diethyl 3,3'-(2-(3-oxopropyl)-5-(trifluoromethyl)-1,3-phenylene)(2E,2'E)-diacrylate (3e):** Olefination was done by *general procedure (E)* with 3-(4-(trifluoromethyl)phenyl)propanal (0.0303 g, 0.15 mmol) as the substrate and ethyl acrylate (50  $\mu\text{L}$ , 3 equiv., 0.45 mmol) as olefin partner. The crude product was purified via using flash chromatography; Eluent: (18% EtOAc

/80% hexane); Appearance: off white solid; isolated yield: 55%; m.p. 115-118 °C; **<sup>1</sup>H NMR** (400 MHz, CDCl<sub>3</sub>): δ 9.82 (s, 1H), 7.98 (d, *J* = 15.7 Hz, 2H), 7.78 (s, 2H), 6.43 (d, *J* = 15.7 Hz, 2H), 4.31 (q, *J* = 7.1 Hz, 4H), 3.25 (t, *J* = 8.2 Hz, 2H), 2.70 (t, *J* = 8.2 Hz, 2H), 1.37 (t, *J* = 7.2 Hz, 6H); **<sup>13</sup>C NMR** (100 MHz, CDCl<sub>3</sub>): δ 199.2, 166.0, 142.2, 140.2, 135.5, 129.8 (d, *J*<sub>C-F</sub> = 32.6 Hz), 124.9 (d, *J*<sub>C-F</sub> = 3.5 Hz), 123.6, 122.1, 61.0, 44.0, 21.5, 14.2; **<sup>19</sup>F NMR** (377 MHz, CDCl<sub>3</sub>): δ -62.9; **IR** (KBr): 2979, 2837, 2865, 1726, 1631, 1182, 1120, 976, 861 cm<sup>-1</sup>; **HRMS** (ESI) Calcd for C<sub>20</sub>H<sub>21</sub>F<sub>3</sub>O<sub>5</sub> [M + H]<sup>+</sup> 399.1414, found 399.1410

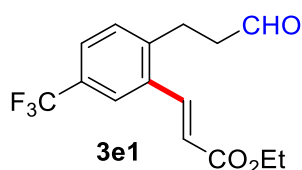

**ethyl (E)-3-(2-(3-oxopropyl)-5-(trifluoromethyl)phenyl)acrylate (3e1)**: The crude product was purified via using flash chromatography; Eluent: (9% EtOAc /92% hexane); Appearance: light yellow viscous oil; isolated yield: 28%. **<sup>1</sup>H NMR** (400 MHz, CDCl<sub>3</sub>): δ 9.81 (s, 1H), 7.94 (d, *J* = 15.7 Hz, 1H), 7.79 (s, 1H), 7.56 (dd, *J* = 8.0, 1.1 Hz, 1H), 7.37 (d, *J* = 8.0 Hz, 1H), 6.45 (d, *J* = 15.7 Hz, 1H), 4.29 (q, *J* = 7.1 Hz, 2H), 3.14 (t, *J* = 8.2 Hz, 2H), 2.79 (t, *J* = 8.2 Hz, 2H), 1.35 (t, *J* = 7.2 Hz, 3H); **<sup>13</sup>C NMR** (100 MHz, CDCl<sub>3</sub>): δ 199.9, 166.3, 143.6, 139.9, 133.9, 130.5, 130.0 (q, *J*<sub>C-F</sub> = 32.6 Hz), 126.4 (q, *J*<sub>C-F</sub> = 3.5 Hz), 125.1 (d, *J*<sub>C-F</sub> = 273 Hz), 123.7 (q, *J*<sub>C-F</sub> = 3.5 Hz), 122.4, 60.8, 44.4, 25.2, 14.2; **<sup>19</sup>F NMR** (377 MHz, CDCl<sub>3</sub>): δ -62.7; **IR** (KBr): 2980, 2837, 1725, 1630, 1441, 978, 863 cm<sup>-1</sup>; **HRMS** (ESI) Calcd for C<sub>15</sub>H<sub>15</sub>F<sub>3</sub>O<sub>3</sub> [M + H]<sup>+</sup> 301.1046, found 301.1043

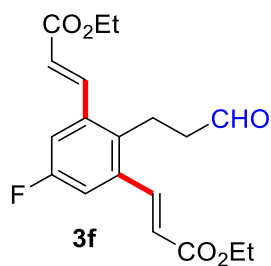

**diethyl 3,3'-(5-fluoro-2-(3-oxopropyl)-1,3-phenylene)(2E,2'E)-diacrylate (3f)**: Olefination was done by *general procedure (E)* with 3-(4-fluorophenyl)propanal (0.0228 g, 0.15 mmol) as the substrate and ethyl acrylate (50 μL, 3 equiv., 0.45 mmol) as olefin partner. The crude product was purified via using flash chromatography; Eluent: (18% EtOAc /82% hexane); Appearance: off white solid; isolated yield: 56%; m.p. 75-77 °C; **<sup>1</sup>H NMR** (400 MHz, CDCl<sub>3</sub>): δ 9.79 (s, 1H), 7.93



(d,  $J = 15.7$  Hz, 2H), 7.26 (d,  $J = 9.1$  Hz, 2H), 6.34 (d,  $J = 15.7$  Hz, 2H), 4.28 (q,  $J = 7.1$  Hz, 4H), 3.16 (t,  $J = 8.2$  Hz, 2H), 2.65 (t,  $J = 8.2$  Hz, 2H), 1.35 (t,  $J = 7.2$  Hz, 6H);  $^{13}\text{C}$  NMR (100 MHz,  $\text{CDCl}_3$ ):  $\delta$  199.7, 166.1, 161.3 (d,  $J_{\text{C-F}} = 246.7$  Hz), 140.3 (d,  $J_{\text{C-F}} = 2.2$  Hz), 136.4 (d,  $J_{\text{C-F}} = 7.8$  Hz), 134.7 (d,  $J_{\text{C-F}} = 3.2$  Hz), 122.8, 115.1 (d,  $J_{\text{C-F}} = 22.1$  Hz), 60.8, 44.6, 20.8, 14.2;  $^{19}\text{F}$  NMR (377 MHz,  $\text{CDCl}_3$ ):  $\delta$  -114.7; IR (KBr): 2981, 2731, 1714, 1633, 1180, 975, 857  $\text{cm}^{-1}$ ; HRMS (ESI) Calcd for  $\text{C}_{19}\text{H}_{21}\text{FO}_5$  [ $\text{M} + \text{H}$ ] $^+$  349.1446, found 349.1442

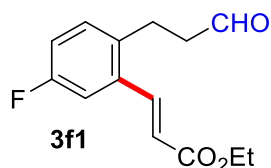

**ethyl (E)-3-(5-fluoro-2-(3-oxopropyl)phenyl)acrylate (3f1):** The crude product was purified via using flash chromatography; Eluent: (9% EtOAc /91% hexane); Appearance: light yellow viscous oil; isolated yield: 19%.  $^1\text{H}$  NMR (400 MHz,  $\text{CDCl}_3$ ):  $\delta$  9.80 (s, 1H), 7.88 (dd,  $J = 15.8, 1.6$  Hz, 1H), 7.26-7.18 (m, 2H), 7.01 (td,  $J = 8.3, 2.7$  Hz, 1H), 6.36 (d,  $J = 15.7$  Hz, 1H), 4.28 (q,  $J = 7.1$  Hz, 2H), 3.06 (t,  $J = 7.5$  Hz, 2H), 2.73 (td,  $J = 7.6, 1.2$  Hz, 2H), 1.35 (t,  $J = 7.1$  Hz, 3H);  $^{13}\text{C}$  NMR (100 MHz,  $\text{CDCl}_3$ ):  $\delta$  200.5, 166.4, 161.5 (d,  $J_{\text{C-F}} = 245.6$  Hz), 140.2 (d,  $J_{\text{C-F}} = 2.5$  Hz), 135.6 (d,  $J_{\text{C-F}} = 3.1$  Hz), 134.8 (d,  $J_{\text{C-F}} = 7.4$  Hz), 131.5 (d,  $J_{\text{C-F}} = 8.0$  Hz), 121.4, 117.0 (d,  $J_{\text{C-F}} = 21.4$  Hz), 113.2 (d,  $J = 22.1$  Hz), 60.7, 45.0, 24.7, 14.2;  $^{19}\text{F}$  NMR (377 MHz,  $\text{CDCl}_3$ ):  $\delta$  -115.5; IR (KBr): 2982, 2939, 1714, 1634, 1442, 978, 864  $\text{cm}^{-1}$ ; HRMS (ESI) Calcd for  $\text{C}_{14}\text{H}_{15}\text{FO}_3$  [ $\text{M} + \text{H}$ ] $^+$  251.1078, found 251.1078

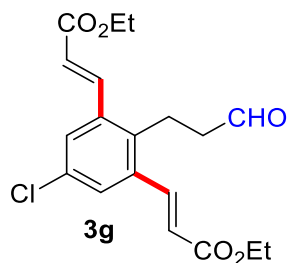

**diethyl 3,3'-(5-chloro-2-(3-oxopropyl)-1,3-phenylene)(2E,2'E)-diacrylate (3g):** Olefination was done by *general procedure (E)* with 3-(4-chlorophenyl)propanal (0.0253 g, 0.15 mmol) as the substrate and ethyl acrylate (50  $\mu\text{L}$ , 3 equiv., 0.45 mmol) as olefin partner. The crude product was purified via using flash chromatography; Eluent: (17% EtOAc /83% hexane); Appearance: off

white solid; isolated yield: 40%; m.p. 122-124 °C;  $^1\text{H NMR}$  (400 MHz,  $\text{CDCl}_3$ ):  $\delta$  9.79 (s, 1H), 7.90 (d,  $J = 15.7$  Hz, 2H), 7.52 (s, 2H), 6.34 (d,  $J = 15.7$  Hz, 2H), 4.28 (q,  $J = 7.1$  Hz, 4H), 3.15 (t,  $J = 8.2$  Hz, 2H), 2.64 (t,  $J = 8.2$  Hz, 2H), 1.34 (t,  $J = 7.2$  Hz, 6H);  $^{13}\text{C NMR}$  (100 MHz,  $\text{CDCl}_3$ ):  $\delta$  199.5, 166.1, 140.2, 137.1, 136.2, 133.1, 128.2, 123.0, 60.9, 44.3, 20.9, 14.2; **IR** (KBr): 2983, 2736, 1714, 1635, 1182, 976, 853  $\text{cm}^{-1}$ ; **HRMS** (ESI) Calcd for  $\text{C}_{19}\text{H}_{21}\text{ClO}_5$   $[\text{M} + \text{H}]^+$  365.1150, found 365.1152

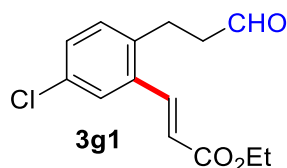

**ethyl (E)-3-(5-chloro-2-(3-oxopropyl)phenyl)acrylate (3g1)**: The crude product was purified via using flash chromatography; Eluent: (9% EtOAc /91% hexane); Appearance: light yellow viscous oil; isolated yield: 20%.  $^1\text{H NMR}$  (400 MHz,  $\text{CDCl}_3$ ):  $\delta$  9.80 (s, 1H), 7.86 (d,  $J = 15.7$  Hz, 1H), 7.53 (d,  $J = 2.2$  Hz, 1H), 7.28 (dd,  $J = 8.3, 2.2$  Hz, 1H), 7.18 (d,  $J = 8.3$  Hz, 1H), 6.37 (d,  $J = 15.7$  Hz, 1H), 4.28 (q,  $J = 7.1$  Hz, 2H), 3.05 (t,  $J = 8.2$  Hz, 2H), 2.74 (t,  $J = 8.2$  Hz, 2H), 1.34 (t,  $J = 7.2$  Hz, 3H);  $^{13}\text{C NMR}$  (100 MHz,  $\text{CDCl}_3$ ):  $\delta$  200.3, 166.4, 140.0, 138.2, 134.8, 132.8, 131.3, 130.0, 126.7, 121.6, 60.8, 44.7, 24.8, 14.3; **HRMS** (ESI) Calcd for  $\text{C}_{14}\text{H}_{15}\text{ClO}_3$   $[\text{M} + \text{H}]^+$  267.0782, found 267.0784

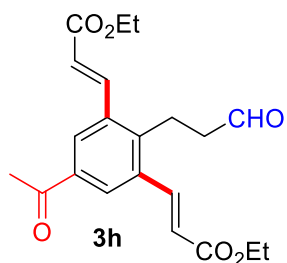

**diethyl 3,3'-(5-acetyl-2-(3-oxopropyl)-1,3-phenylene)(2E,2'E)-diacrylate (3h)**: Olefination was done by *general procedure (E)* with 3-(4-acetylphenyl)propanal (0.0264 g, 0.15 mmol) as the substrate and ethyl acrylate (50  $\mu\text{L}$ , 3 equiv., 0.45 mmol) as olefin partner. The crude product was purified via using flash chromatography; Eluent: (20% EtOAc /75% hexane); Appearance: off white solid; isolated yield: 49%; m.p. 110-112 °C;  $^1\text{H NMR}$  (400 MHz,  $\text{CDCl}_3$ ):  $\delta$  9.81 (s, 1H), 8.11 (s, 2H), 8.00 (d,  $J = 15.7$  Hz, 2H), 6.45 (d,  $J = 15.7$  Hz, 2H), 4.29 (q,  $J = 7.1$  Hz, 4H), 3.24 (t,  $J = 8.2$  Hz, 2H), 2.70 (t,  $J = 8.2$  Hz, 2H), 2.64 (s, 3H), 1.36 (t,  $J = 7.2$  Hz, 6H);  $^{13}\text{C NMR}$  (100

MHz, CDCl<sub>3</sub>):  $\delta$  199.3, 196.6, 166.1, 143.5, 140.6, 135.9, 135.1, 128.0, 123.1, 60.9, 43.9, 26.5, 21.6, 14.2; **IR** (KBr): 2980, 2778, 1720, 1636, 1603, 1360, 1186, 1040, 980, 868, 844 cm<sup>-1</sup>; **HRMS** (ESI) Calcd for C<sub>21</sub>H<sub>24</sub>O<sub>6</sub> [M + H]<sup>+</sup> 373.1646, found 373.1642

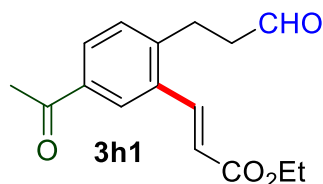

**ethyl (E)-3-(5-acetyl-2-(3-oxopropyl)phenyl)acrylate (3h1):** The crude product was purified via using flash chromatography; Eluent: (10% EtOAc /85% hexane); Appearance: light yellow viscous oil; isolated yield: 24%. **<sup>1</sup>H NMR** (400 MHz, CDCl<sub>3</sub>):  $\delta$  9.81 (s, 1H), 8.14 (d, *J* = 1.8 Hz, 1H), 7.94 (d, *J* = 15.7 Hz, 1H), 7.90 (dd, *J* = 8.0, 1.8 Hz, 1H), 7.35 (d, *J* = 8.0 Hz, 1H), 6.49 (d, *J* = 15.7 Hz, 1H), 4.29 (q, *J* = 7.1 Hz, 2H), 3.14 (t, *J* = 8.2 Hz, 2H), 2.79 (t, *J* = 8.2 Hz, 2H), 2.61 (s, 3H), 1.36 (t, *J* = 7.2 Hz, 3H); **<sup>13</sup>C NMR** (100 MHz, CDCl<sub>3</sub>):  $\delta$  200.0, 197.1, 166.4, 144.9, 140.4, 135.9, 133.6, 130.2, 129.6, 126.8, 121.7, 60.7, 44.3, 26.5, 25.4, 14.2; **IR** (KBr): 2977, 1731, 1637, 1603, 1360, 1183, 1035, 975, 865, 840 cm<sup>-1</sup>; **HRMS** (ESI) Calcd for C<sub>16</sub>H<sub>18</sub>O<sub>4</sub> [M + H]<sup>+</sup> 275.1278, found 275.1275

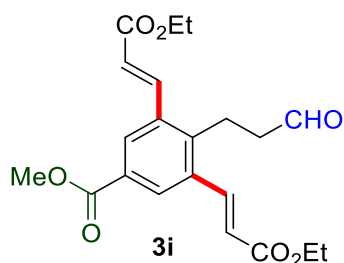

**Diethyl 3,3'-(5-(methoxycarbonyl)-2-(3-oxopropyl)-1,3-phenylene)(2E,2'E)-diacrylate (3i):** Olefination was done by *general procedure (E)* with methyl 4-(3-oxopropyl)benzoate (0.0288g, 0.15 mmol) as the substrate and ethyl acrylate (50  $\mu$ L, 3 equiv., 0.45 mmol) as olefin partner. The crude product was purified via using flash chromatography; Eluent: (22% EtOAc /78% hexane); Appearance: off white solid; isolated yield: 45%; m.p. 98-100 °C; **<sup>1</sup>H NMR** (400 MHz, CDCl<sub>3</sub>):  $\delta$  9.80 (s, 1H), 8.21 (s, 2H), 7.96 (d, *J* = 15.7 Hz, 2H), 6.46 (d, *J* = 15.7 Hz, 2H), 4.29 (q, *J* = 7.1 Hz, 4H), 3.95 (s, 3H), 3.24 (t, *J* = 8.2 Hz, 2H), 2.68 (t, *J* = 8.2 Hz, 2H), 1.35 (t, *J* = 7.2 Hz, 6H); **<sup>13</sup>C NMR** (100 MHz, CDCl<sub>3</sub>):  $\delta$  199.3, 166.2, 165.9, 143.3, 140.5, 134.9, 129.3, 129.3, 123.0,

60.9, 52.4, 44.0, 21.5, 14.2; **IR** (KBr): 2983, 1725, 1631, 1601, 1278, 1183, 1033, 979, 868, 770  $\text{cm}^{-1}$ ; **HRMS** (ESI) Calcd for  $\text{C}_{21}\text{H}_{24}\text{O}_7$   $[\text{M} + \text{H}]^+$  389.1595, found 389.1591

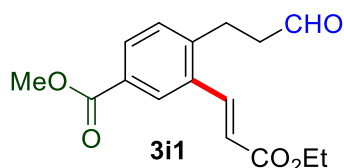

**Diethyl 3,3'-(5-(methoxycarbonyl)-2-(3-oxopropyl)-1,3-phenylene)(2E,2'E)-diacrylate (3i1):**

The crude product was purified via using flash chromatography; Eluent: (12% EtOAc /88% hexane); Appearance: light yellow viscous oil; isolated yield: 23%.  **$^1\text{H}$  NMR** (400 MHz,  $\text{CDCl}_3$ ):  $\delta$  9.82 (s, 1H), 8.25 (d,  $J = 1.6$  Hz, 1H), 7.98-7.95 (m, 2H), 7.32 (d,  $J = 8.0$  Hz, 1H), 6.50 (d,  $J = 15.7$  Hz, 1H), 4.29 (q,  $J = 7.1$  Hz, 2H), 3.93 (s, 3H), 3.14 (t,  $J = 8.2$  Hz, 2H), 2.79 (t,  $J = 8.2$  Hz, 2H), 1.36 (t,  $J = 7.2$  Hz, 3H);  **$^{13}\text{C}$  NMR** (100 MHz,  $\text{CDCl}_3$ ):  $\delta$  200.1, 166.5, 166.4, 144.7, 140.3, 133.4, 130.8, 130.1, 129.0, 128.1, 121.6, 60.7, 52.2, 44.4, 25.4, 14.2; **IR** (KBr): 2984, 1726, 1632, 1604, 1282, 1042, 979, 871, 772  $\text{cm}^{-1}$ ; **HRMS** (ESI) Calcd for  $\text{C}_{16}\text{H}_{18}\text{O}_5$   $[\text{M} + \text{H}]^+$  291.1227, found 291.1223

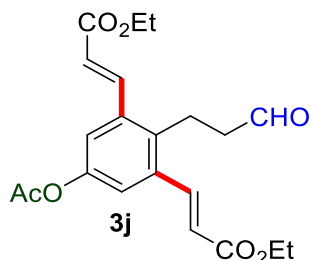

**diethyl 3,3'-(5-acetoxy-2-(3-oxopropyl)-1,3-phenylene)(2E,2'E)-diacrylate (3j):**

Olefination was done by *general procedure (E)* with methyl 4-(3-oxopropyl)phenyl acetate (0.0288g, 0.15 mmol) as the substrate and ethyl acrylate (50  $\mu\text{L}$ , 3 equiv., 0.45 mmol) as olefin partner. The crude product was purified via using flash chromatography; Eluent: (25% EtOAc /75% hexane); Appearance: off white solid; isolated yield: 53%; m.p. 135-137  $^\circ\text{C}$ ;  **$^1\text{H}$  NMR** (400 MHz,  $\text{CDCl}_3$ ):  $\delta$  9.81 (s, 1H), 7.94 (d,  $J = 15.7$  Hz, 2H), 7.29 (s, 2H), 6.34 (d,  $J = 15.7$  Hz, 2H), 4.28 (q,  $J = 7.1$  Hz, 4H), 3.18 (t,  $J = 8.2$  Hz, 2H), 2.67 (t,  $J = 8.2$  Hz, 2H), 2.33 (s, 3H), 1.34 (t,  $J = 7.2$  Hz, 6H);  **$^{13}\text{C}$  NMR** (100 MHz,  $\text{CDCl}_3$ ):  $\delta$  199.7, 169.2, 166.2, 149.3, 140.5, 136.3, 135.9, 122.6, 121.6, 60.7, 44.4, 21.0, 20.9, 14.2; **IR** (KBr): 2982, 1763, 1713, 1629, 1213, 1179, 1031, 981, 868  $\text{cm}^{-1}$ ; **HRMS** (ESI) Calcd for  $\text{C}_{21}\text{H}_{24}\text{O}_7$   $[\text{M} + \text{H}]^+$  389.1595, found 389.1592

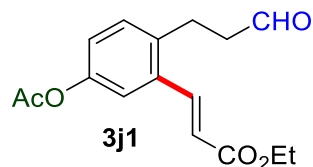

**ethyl (E)-3-(5-acetoxy-2-(3-oxopropyl)phenyl)acrylate (3j1):** The crude product was purified via using flash chromatography; Eluent: (14% EtOAc /86% hexane); Appearance: light yellow viscous oil; isolated yield: 27%. **<sup>1</sup>H NMR** (400 MHz, CDCl<sub>3</sub>): δ 9.82 (s, 1H), 7.91 (d, *J* = 15.7 Hz, 1H), 7.29 (d, *J* = 2.2 Hz, 1H), 7.26 (d, *J* = 8.4 Hz, 1H), 7.06 (dd, *J* = 8.4, 2.4 Hz, 1H), 6.37 (d, *J* = 15.7 Hz, 1H), 4.29 (q, *J* = 7.1 Hz, 2H), 3.09 (t, *J* = 8.2 Hz, 2H), 2.76 (t, *J* = 8.2 Hz, 2H), 2.32 (s, 3H), 1.35 (t, *J* = 7.2 Hz, 3H); **<sup>13</sup>C NMR** (100 MHz, CDCl<sub>3</sub>): δ 200.5, 169.4, 166.5, 149.4, 140.4, 137.3, 134.3, 131.0, 123.3, 121.2, 119.7, 60.7, 44.9, 24.8, 21.0, 14.2; **HRMS** (ESI) Calcd for C<sub>16</sub>H<sub>18</sub>O<sub>5</sub> [M + H]<sup>+</sup> 291.1256, found 291.1252

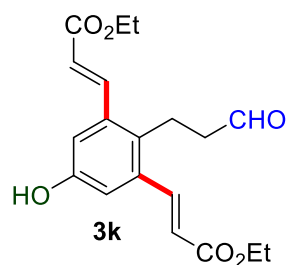

**diethyl 3,3'-(5-hydroxy-2-(3-oxopropyl)-1,3-phenylene)(2E,2'E)-diacrylate (3k):** Olefination was done by *general procedure (E)* with 3-(4-hydroxyphenyl)propanal (0.0225g, 0.15 mmol) as the substrate and ethyl acrylate (50 μL, 3 equiv., 0.45 mmol) as olefin partner. The crude product was purified via using flash chromatography; Eluent: (30% EtOAc /50% hexane); Appearance: off white solid; isolated yield: 55%; m.p. 154-156 °C; **<sup>1</sup>H NMR** (400 MHz, CDCl<sub>3</sub>): δ 9.75 (s, 1H), 7.93 (d, *J* = 15.7 Hz, 2H), 7.08 (s, 2H), 6.29 (d, *J* = 15.7 Hz, 2H), 4.28 (q, *J* = 7.1 Hz, 4H), 3.11 (t, *J* = 8.2 Hz, 2H), 2.61 (t, *J* = 8.2 Hz, 2H), 1.34 (t, *J* = 7.2 Hz, 6H); **<sup>13</sup>C NMR** (100 MHz, CDCl<sub>3</sub>): δ 200.6, 166.9, 154.9, 141.7, 135.5, 131.0, 121.5, 115.7, 61.0, 45.0, 20.6, 14.2; **IR** (KBr): 3296, 2980, 1714, 1680, 1627, 1317, 1190, 1031, 974, 868 cm<sup>-1</sup>; **HRMS** (ESI) Calcd for C<sub>19</sub>H<sub>22</sub>O<sub>6</sub> [M + H]<sup>+</sup> 347.1489, found 347.1487

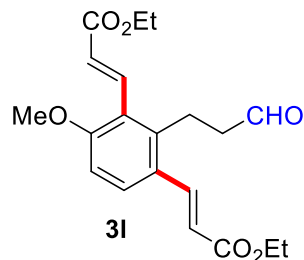

**diethyl 3,3'-(4-methoxy-2-(3-oxopropyl)-1,3-phenylene)(2E,2'E)-diacrylate (3l):** Olefination was done by *general procedure (E)* with 3-(3-methoxyphenyl)propanal (0.0246g, 0.15 mmol) as the substrate and ethyl acrylate (50  $\mu$ L, 3 equiv., 0.45 mmol) as olefin partner. The crude product was purified via using flash chromatography; Eluent: (17% EtOAc /83% hexane); Appearance: off white solid; isolated yield: 67%; m.p. 96-98  $^{\circ}$ C;  $^1\text{H NMR}$  (400 MHz,  $\text{CDCl}_3$ ):  $\delta$  9.81 (s, 1H), 7.94 (d,  $J = 15.7$  Hz, 1H), 7.77 (d,  $J = 15.7$  Hz, 1H), 7.56 (d,  $J = 8.8$  Hz, 1H), 6.87 (d,  $J = 8.8$  Hz, 1H), 6.55 (d,  $J = 15.7$  Hz, 1H), 6.28 (d,  $J = 15.7$  Hz, 1H), 4.28 (q,  $J = 7.1$  Hz, 4H), 3.90 (s, 3H), 3.21 (t,  $J = 8.2$  Hz, 2H), 2.67 (t,  $J = 8.2$  Hz, 2H), 1.35 (t,  $J = 7.2$  Hz, 6H);  $^{13}\text{C NMR}$  (100 MHz,  $\text{CDCl}_3$ ):  $\delta$  199.9, 167.2, 166.8, 159.8, 141.4, 140.8, 137.6, 129.1, 126.5, 124.7, 123.0, 119.4, 109.7, 60.5, 55.7, 44.5, 21.7, 14.3; **IR** (KBr):2982, 1704, 1627, 1583, 1479, 1272, 1168, 1036, 976, 818  $\text{cm}^{-1}$ ; **HRMS** (ESI) Calcd for  $\text{C}_{20}\text{H}_{24}\text{O}_6$   $[\text{M} + \text{H}]^+$  361.1646, found 361.1639

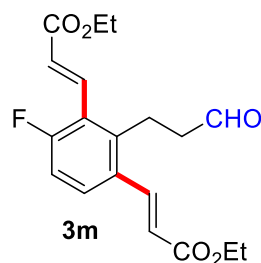

**diethyl 3,3'-(4-fluoro-2-(3-oxopropyl)-1,3-phenylene)(2E,2'E)-diacrylate (3m):** Olefination was done by *general procedure (E)* with 3-(3-fluorophenyl)propanal (0.0228g, 0.15 mmol) as the substrate and ethyl acrylate (50  $\mu$ L, 3 equiv., 0.45 mmol) as olefin partner. The crude product was purified via using flash chromatography; Eluent: (16% EtOAc /84% hexane); Appearance: off white solid; isolated yield: 65%; m.p. 98-99  $^{\circ}$ C;  $^1\text{H NMR}$  (400 MHz,  $\text{CDCl}_3$ ):  $\delta$  9.79 (s, 1H), 7.91 (d,  $J = 15.7$  Hz, 1H), 7.68 (d,  $J = 15.7$  Hz, 1H), 7.52 (dd,  $J = 5.5, 3.2$  Hz, 1H), 7.04 (dd,  $J = 8.8, 1.2$  Hz, 1H), 6.51 (dd,  $J = 15.7, 1.7$  Hz, 1H), 6.30 (d,  $J = 15.7$  Hz, 1H), 4.30-4.25 (m, 4H), 3.19 (t,  $J = 8.2$  Hz, 2H), 2.67 (t,  $J = 8.2$  Hz, 2H), 1.36-1.32 (m, 6H);  $^{13}\text{C NMR}$  (100 MHz,  $\text{CDCl}_3$ ):  $\delta$  199.4,

166.5, 166.3, 161.9 (d,  $J_{C-F} = 256.5$  Hz), 141.3 (d,  $J_{C-F} = 2.3$  Hz), 140.6, 134.7, 130.4 (d,  $J_{C-F} = 3.6$  Hz), 129.4 (d,  $J_{C-F} = 10.1$  Hz), 126.1 (d,  $J_{C-F} = 12.2$  Hz), 122.3 (d,  $J_{C-F} = 12.1$  Hz), 121.5, 114.9 (d,  $J_{C-F} = 23.9$  Hz), 60.8, 60.7, 44.1, 21.7, 14.19, 14.18;  **$^{19}\text{F}$  NMR** (377 MHz,  $\text{CDCl}_3$ ):  $\delta$  -107.8; **IR** (KBr): 2982, 1715, 1624, 1268, 1159, 1023, 977, 816  $\text{cm}^{-1}$ ; **HRMS** (ESI) Calcd for  $\text{C}_{19}\text{H}_{21}\text{FO}_5$   $[\text{M} + \text{H}]^+$  349.1446, found 349.1442

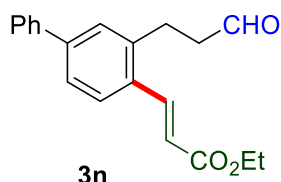

**ethyl (E)-3-(3-(3-oxopropyl)-[1,1'-biphenyl]-4-yl)acrylate:** The crude product was purified via using flash chromatography; Eluent: (10% EtOAc /90% hexane); Appearance: light yellow viscous oil; isolated yield: 62%.  **$^1\text{H}$  NMR** (400 MHz,  $\text{CDCl}_3$ ):  $\delta$  9.82 (s, 1H), 7.97 (d,  $J = 15.8$  Hz, 1H), 7.64 (d,  $J = 8.0$  Hz, 1H), 7.60 – 7.56 (m, 2H), 7.49 – 7.42 (m, 4H), 7.38 – 7.34 (m, 1H), 6.42 (d,  $J = 15.7$  Hz, 1H), 4.28 (q,  $J = 7.1$  Hz, 2H), 3.15 (t,  $J = 7.6$  Hz, 2H), 2.79 (td,  $J = 7.6, 1.2$  Hz, 2H), 1.35 (t,  $J = 7.1$  Hz, 3H);  **$^{13}\text{C}$  NMR** (100 MHz,  $\text{CDCl}_3$ ):  $\delta$  200.7, 166.8, 142.9, 140.8, 140.3, 139.9, 131.8, 128.8, 128.5, 127.8, 127.3, 126.9, 125.6, 119.9, 60.6, 44.9, 25.5, 14.3; **IR** (KBr): 2981, 1710, 1634, 1444, 1364, 1282, 1182, 1036, 978, 859  $\text{cm}^{-1}$ ; **HRMS** (ESI) Calcd for  $\text{C}_{20}\text{H}_{20}\text{O}_3$   $[\text{M} + \text{H}]^+$  309.1412, found 309.1409. *The appearance of doublet due to one proton at  $\delta$  7.64 signify the olefination at position C-6 rather than at C-2.*

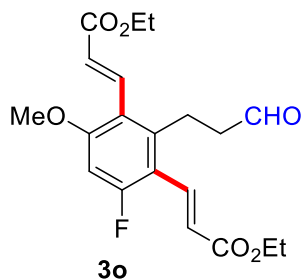

**diethyl 3,3'-(4-fluoro-6-methoxy-2-(3-oxopropyl)-1,3-phenylene)(2E,2'E)-diacrylate (3o):** Olefination was done by *general procedure (E)* with 3-(3-fluoro-5-methoxyphenyl)propanal (0.0273 g, 0.15 mmol) as the substrate and ethyl acrylate (50  $\mu\text{L}$ , 3 equiv., 0.45 mmol) as olefin partner. The crude product was purified via using flash chromatography; Eluent: (19% EtOAc /81% hexane); Appearance: viscous oil; isolated yield: 63%.  **$^1\text{H}$  NMR** (400 MHz,  $\text{CDCl}_3$ ):  $\delta$  9.79 (s, 1H), 7.69 (d,  $J = 16.1$  Hz, 1H), 7.64 (d,  $J = 16.1$  Hz, 1H), 6.64 (d,  $J = 12.8$  Hz, 1H), 6.51-6.45

(m, 2H), 4.26 (q,  $J = 7.1$  Hz, 4H), 3.88 (s, 3H), 3.19 (t,  $J = 8.2$  Hz, 2H), 2.66 (t,  $J = 8.2$  Hz, 2H), 1.34 (t,  $J = 7.2$  Hz, 6H);  $^{13}\text{C}$  NMR (100 MHz,  $\text{CDCl}_3$ ):  $\delta$  199.5, 167.1, 167.0, 161.4, 160.2 (d,  $J_{\text{C-F}} = 11.6$  Hz), 142.9, 136.9, 134.9, 124.5, 123.8 (d,  $J_{\text{C-F}} = 13.3$  Hz), 119.4, 114.5, 98.4 (d,  $J_{\text{C-F}} = 27.9$  Hz), 60.6 (d,  $J_{\text{C-F}} = 3.7$  Hz), 55.9, 44.1, 22.2, 14.3;  $^{19}\text{F}$  NMR (377 MHz,  $\text{CDCl}_3$ ):  $\delta$  -104.5; IR (KBr): 2982, 1721, 1626, 1310, 1170, 1098, 1031, 978, 857  $\text{cm}^{-1}$ ; HRMS (ESI) Calcd for  $\text{C}_{20}\text{H}_{23}\text{FO}_6$   $[\text{M} + \text{H}]^+$  379.1551, found 379.1548

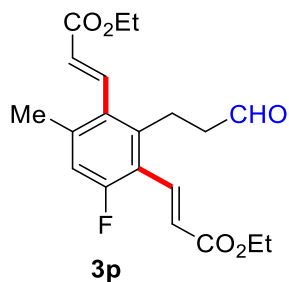

**diethyl 3,3'-(4-fluoro-6-methyl-2-(3-oxopropyl)-1,3-phenylene)(2E,2'E)-diacrylate (3p):**

Olefination was done by *general procedure (E)* with 3-(3-fluoro-5-methylphenyl)propanal (0.0249 g, 0.15 mmol) as the substrate and ethyl acrylate (50  $\mu\text{L}$ , 3 equiv., 0.45 mmol) as olefin partner. The crude product was purified *via* using flash chromatography; Eluent: (17 % EtOAc /83% hexane); Appearance: light yellow viscous oil; isolated yield: 40%.  $^1\text{H}$  NMR (400 MHz,  $\text{CDCl}_3$ ):  $\delta$  9.78 (s, 1H), 7.75 (d,  $J = 16.3$  Hz, 1H), 7.65 (d,  $J = 16.3$  Hz, 1H), 6.93 (d,  $J = 11.8$  Hz, 1H), 6.55 (dd,  $J = 16.3, 1.4$  Hz, 1H), 5.98 (d,  $J = 16.3$  Hz, 1H), 4.32-4.26 (m, 4H), 3.10 (t,  $J = 8.2$  Hz, 2H), 2.63 (t,  $J = 8.2$  Hz, 2H), 2.32 (s, 3H), 1.38-1.34 (m, 6H);  $^{13}\text{C}$  NMR (100 MHz,  $\text{CDCl}_3$ ):  $\delta$  199.7, 166.9, 165.8, 160.8 (d,  $J_{\text{C-F}} = 254.2$  Hz), 142.2, 140.4 (d,  $J_{\text{C-F}} = 2.8$  Hz), 139.8 (d,  $J_{\text{C-F}} = 9.6$  Hz), 134.9, 131.3 (d,  $J_{\text{C-F}} = 3.5$  Hz), 126.1, 124.9 (d,  $J_{\text{C-F}} = 13.2$  Hz), 119.4 (d,  $J_{\text{C-F}} = 11.6$  Hz), 116.4 (d,  $J_{\text{C-F}} = 23.3$  Hz), 60.8, 60.7, 44.0, 22.7, 21.3, 14.24, 14.21;  $^{19}\text{F}$  NMR (377 MHz,  $\text{CDCl}_3$ ):  $\delta$  -110.9; IR (KBr): 2984, 1718, 1627, 1600, 1306, 1174, 1095, 1033, 977, 855  $\text{cm}^{-1}$ ; HRMS (ESI) Calcd for  $\text{C}_{20}\text{H}_{23}\text{FO}_5$   $[\text{M} + \text{H}]^+$  363.1602, found 363.1595

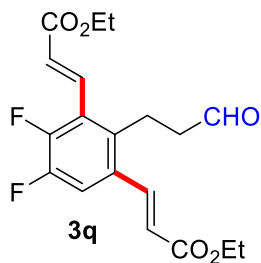



**diethyl 3,3'-(4,5-difluoro-2-(3-oxopropyl)-1,3-phenylene)(2E,2'E)-diacrylate (3q):**

Olefination was done by *general procedure (E)* with 3-(3,4-difluorophenyl)propanal (0.0255 g, 0.15 mmol) as the substrate and ethyl acrylate (50  $\mu$ L, 3 equiv., 0.45 mmol) as olefin partner. The crude product was purified via using flash chromatography; Eluent: (18 % EtOAc /82% hexane); Appearance: off white solid; isolated yield: 55%; m.p. 70-73  $^{\circ}$ C;  $^1\text{H NMR}$  (400 MHz,  $\text{CDCl}_3$ ):  $\delta$  9.79 (s, 1H), 7.87 (d,  $J = 15.6$  Hz, 1H), 7.64 (d,  $J = 16.2$  Hz, 1H), 7.35 (dd,  $J = 7.9, 2.7$  Hz, 1H), 6.52 (dd,  $J = 16.2, 1.6$  Hz, 1H), 6.29 (d,  $J = 15.6$  Hz, 1H), 4.32-4.25 (m, 4H), 3.14 (t,  $J = 8.2$  Hz, 2H), 2.66 (t,  $J = 8.2$  Hz, 2H), 1.37-1.33 (m, 6H);  $^{13}\text{C NMR}$  (100 MHz,  $\text{CDCl}_3$ ):  $\delta$  199.3, 166.1, 166.0, 151.1 (dd,  $J_{\text{C-F}} = 258.0$  Hz,  $J_{2\text{C-F}} = 14.1$ ), 150.6 (dd,  $J_{\text{C-F}} = 248.3$  Hz,  $J_{2\text{C-F}} = 13.9$ ), 139.6, 136.1 (d,  $J_{\text{C-F}} = 3.5$  Hz), 134.0, 130.5 (dd,  $J_{1,\text{C-F}} = 5.6$  Hz,  $J_{2,\text{C-F}} = 4.6$  Hz), 127.1 (d,  $J_{\text{C-F}} = 11.5$  Hz), 124.4 (d,  $J_{\text{C-F}} = 8.9$  Hz), 122.5, 116.0 (d,  $J_{\text{C-F}} = 17.7$  Hz), 61.0, 60.8, 44.1, 21.3, 14.18, 14.17;  $^{19}\text{F NMR}$  (377 MHz,  $\text{CDCl}_3$ ):  $\delta$  -133.6 (d,  $J_{\text{C-F}} = 21.2$  Hz),  $\delta$  -138.2 (d,  $J_{\text{C-F}} = 20.8$  Hz); **IR** (KBr): 2984, 1720, 1627, 1476, 1313, 1181, 1032, 979, 856  $\text{cm}^{-1}$ ; **HRMS** (ESI) Calcd for  $\text{C}_{19}\text{H}_{20}\text{F}_2\text{O}_5$  [ $\text{M} + \text{H}$ ] $^+$  367.1352, found 367.1350

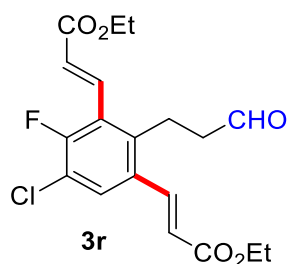

**diethyl 3,3'-(5-chloro-4-fluoro-2-(3-oxopropyl)-1,3-phenylene)(2E,2'E)-diacrylate (3r):**

Olefination was done by *general procedure (E)* with 3-(4-chloro-3-fluorophenyl)propanal (0.02799 g, 0.15 mmol) as the substrate and ethyl acrylate (50  $\mu$ L, 3 equiv., 0.45 mmol) as olefin partner. The crude product was purified via using flash chromatography; Eluent: (12 % EtOAc /88% hexane); Appearance: off white solid; isolated yield: 56%; m.p. 105-108  $^{\circ}$ C;  $^1\text{H NMR}$  (400 MHz,  $\text{CDCl}_3$ ):  $\delta$  9.78 (s, 1H), 7.85 (d,  $J = 15.7$  Hz, 1H), 7.64 (d,  $J = 16.2$  Hz, 1H), 7.56 (d,  $J = 7.3$  Hz, 1H), 6.50 (dd,  $J = 16.2, 1.9$  Hz, 1H), 6.31 (d,  $J = 15.7$  Hz, 1H), 4.28 (qd,  $J = 7.1, 5.0$  Hz, 4H), 3.14 (m, 2H), 2.66 (m, 2H), 1.34 (td,  $J = 7.1, 3.2$  Hz, 6H);  $^{13}\text{C NMR}$  (100 MHz,  $\text{CDCl}_3$ ):  $\delta$  199.2, 166.1 (d,  $J_{\text{C-F}} = 17.1$  Hz), 156.8 (d,  $J_{\text{C-F}} = 257.4$  Hz), 139.6 (d,  $J_{\text{C-F}} = 10.5$  Hz), 134.1, 131.1 (d,  $J_{\text{C-F}} = 4.5$  Hz), 129.3, 127.1 (d,  $J_{\text{C-F}} = 11.5$  Hz), 123.9 (d,  $J_{\text{C-F}} = 12.1$  Hz), 122.6, 120.7 (d,  $J_{\text{C-F}} = 19.8$  Hz), 60.98, 60.89, 43.9, 21.6, 14.2;  $^{19}\text{F NMR}$  (377 MHz,  $\text{CDCl}_3$ ):  $\delta$  -110.3; **IR** (KBr): 2981,

1720, 1627, 1456, 1309, 1181, 1035, 981, 858  $\text{cm}^{-1}$ ; **HRMS** (ESI) Calcd for  $\text{C}_{19}\text{H}_{20}\text{ClFO}_5$  [ $\text{M} + \text{H}$ ] $^+$  383.1056, found 383.1057

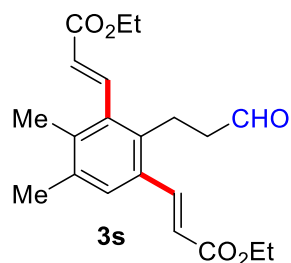

**diethyl 3,3'-(4,5-dimethyl-2-(3-oxopropyl)-1,3-phenylene)(2E,2'E)-diacrylate (3s):**

Olefination was done by *general procedure (E)* with 3-(3,4-dimethylphenyl)propanal (0.0243 g, 0.15 mmol) as the substrate and ethyl acrylate (50  $\mu\text{L}$ , 3 equiv., 0.45 mmol) as olefin partner. The crude product was purified via using flash chromatography; Eluent: (13 % EtOAc /82% hexane); Appearance: viscous oil; isolated yield: 40%.  **$^1\text{H NMR}$**  (400 MHz,  $\text{CDCl}_3$ ):  $\delta$  9.78 (s, 1H), 7.92 (d,  $J = 15.7$  Hz, 1H), 7.85 (d,  $J = 15.7$  Hz, 1H), 7.37 (s, 1H), 6.36 (d,  $J = 15.7$  Hz, 1H), 5.94 (d,  $J = 15.7$  Hz, 1H), 4.32-4.25 (m, 4H), 3.07 (t,  $J = 8.2$  Hz, 2H), 2.59 (t,  $J = 8.2$  Hz, 2H), 2.31 (s, 3H), 2.22 (s, 3H), 1.38-1.34 (m, 6H);  **$^{13}\text{C NMR}$**  (100 MHz,  $\text{CDCl}_3$ ):  $\delta$  201.3, 166.7, 166.0, 144.0, 141.7, 137.0, 135.8, 135.7, 135.1, 130.8, 128.1, 125.8, 120.2, 60.8, 60.5, 44.6, 22.1, 20.4, 17.5, 14.3, 14.2; **IR** (KBr): 2980, 1709, 1630, 1307, 1270, 1178, 1032, 979, 863  $\text{cm}^{-1}$ ; **HRMS** (ESI) Calcd for  $\text{C}_{21}\text{H}_{26}\text{O}_5$  [ $\text{M} + \text{H}$ ] $^+$  359.1853, found 359.1849

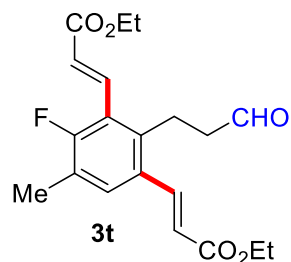

**diethyl 3,3'-(4-fluoro-5-methyl-2-(3-oxopropyl)-1,3-phenylene)(2E,2'E)-diacrylate (3t):**

Olefination was done by *general procedure (E)* with 3-(3-fluoro-4-methylphenyl)propanal (0.0249 g, 0.15 mmol) as the substrate and ethyl acrylate (50  $\mu\text{L}$ , 3 equiv., 0.45 mmol) as olefin partner. The crude product was purified via using flash chromatography; Eluent: (15 % EtOAc /85% hexane); Appearance: off white solid; isolated yield: 59%; m.p. 127-130  $^{\circ}\text{C}$ ;  **$^1\text{H NMR}$**  (400 MHz,  $\text{CDCl}_3$ ):  $\delta$  9.79 (s, 1H), 7.89 (d,  $J = 15.7$  Hz, 1H), 7.68 (d,  $J = 15.7$  Hz, 1H), 7.38 (d,  $J = 7.5$  Hz,

1H), 6.50 (dd,  $J = 16.0, 1.3$  Hz, 1H), 6.29 (d,  $J = 15.7$  Hz, 1H), 4.31-4.24 (m, 4H), 3.15 (t,  $J = 8.2$  Hz, 2H), 2.66 (t,  $J = 8.2$  Hz, 2H), 2.28 (s, 3H), 1.34 (td,  $J = 7.2, 2.0$  Hz, 6H);  $^{13}\text{C}$  NMR (100 MHz,  $\text{CDCl}_3$ ):  $\delta$  199.7, 166.6, 166.4, 160.5 (d,  $J_{\text{C-F}} = 255.3$  Hz), 140.8, 138.7 (d,  $J_{\text{C-F}} = 2.2$  Hz), 135.2, 130.8 (d,  $J_{\text{C-F}} = 6.7$  Hz), 129.7 (d,  $J_{\text{C-F}} = 4.2$  Hz), 125.8 (d,  $J_{\text{C-F}} = 12.5$  Hz), 124.3 (d,  $J_{\text{C-F}} = 20.0$  Hz), 121.9 (d,  $J_{\text{C-F}} = 1$  Hz), 121.1, 60.7, 60.6, 44.4, 21.5, 14.51, 14.47;  $^{19}\text{F}$  NMR (377 MHz,  $\text{CDCl}_3$ ):  $\delta$  -111.5; IR (KBr): 2983, 1716, 1627, 1316, 1187, 1080, 1035, 979, 869  $\text{cm}^{-1}$ ; HRMS (ESI) Calcd for  $\text{C}_{20}\text{H}_{23}\text{FO}_5$   $[\text{M} + \text{H}]^+$  363.1602, found 363.1597

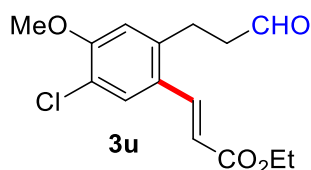

**ethyl (E)-3-(5-chloro-4-methoxy-2-(3-oxopropyl)phenyl)acrylate (3u):** Olefination was done by *general procedure (E)* with 3-(4-chloro-3-methoxyphenyl)propanal (0.02930 g, 0.15 mmol) as the substrate and ethyl acrylate (50  $\mu\text{L}$ , 3 equiv., 0.45 mmol) as olefin partner. The crude product was purified via using flash chromatography; Eluent: (13 % EtOAc /87% hexane); Appearance: off white solid; isolated yield: 71%; m.p. 59-61  $^\circ\text{C}$ ;  $^1\text{H}$  NMR (400 MHz,  $\text{CDCl}_3$ ):  $\delta$  9.80 (s, 1H), 7.80 (d,  $J = 15.7$  Hz, 1H), 7.60 (s, 1H), 7.79 (s, 1H), 6.30 (d,  $J = 15.7$  Hz, 1H), 4.26 (q,  $J = 7.2$  Hz, 2H), 3.92 (s, 3H), 3.07 (t,  $J = 7.5$  Hz, 2H), 2.76 (t,  $J = 7.5$  Hz, 2H), 1.34 (t,  $J = 7.2$  Hz, 3H);  $^{13}\text{C}$  NMR (100 MHz,  $\text{CDCl}_3$ ):  $\delta$  200.2, 166.8, 156.1, 140.4, 139.5, 128.4, 126.1, 121.3, 118.9, 113.4, 60.6, 56.2, 45.0, 25.4 and 14.3; IR (KBr): 2982, 1706, 1628, 1180, 1040, 976, 860  $\text{cm}^{-1}$ ; HRMS (ESI) Calcd for  $\text{C}_{15}\text{H}_{17}\text{ClO}_4$   $[\text{M} + \text{H}]^+$  297.0888, found 297.0888

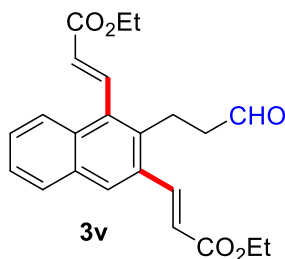

**diethyl 3,3'-(2-(3-oxopropyl)naphthalene-1,3-diyl)(2E,2'E)-diacrylate (3v):** Olefination was done by *general procedure (E)* with 3-(naphthalen-2-yl)propanal (0.0276 g, 0.15 mmol) as the substrate and ethyl acrylate (50  $\mu\text{L}$ , 3 equiv., 0.45 mmol) as olefin partner. The crude product was purified via using flash chromatography; Eluent: (16 % EtOAc /84% hexane); Appearance: light

yellow viscous oil; isolated yield: 40 %. **<sup>1</sup>H NMR** (400 MHz, CDCl<sub>3</sub>): δ 9.80 (s, 1H), 8.14 (d, *J* = 15.7 Hz, 1H), 8.05 (d, *J* = 15.7 Hz, 1H), 8.03 (s, 1H), 7.97-7.94 (m, 1H), 7.85-7.83 (m, 1H), 7.52-7.49 (m, 2H), 6.50 (d, *J* = 15.7 Hz, 1H), 6.17 (d, *J* = 15.7 Hz, 1H), 4.36-4.27 (m, 4H), 3.25 (t, *J* = 8.2 Hz, 2H), 2.68 (t, *J* = 8.2 Hz, 2H), 1.40-1.35 (m, 6H); **<sup>13</sup>C NMR** (100 MHz, CDCl<sub>3</sub>): δ 200.0, 166.4, 165.9, 142.1, 141.9, 134.4, 132.6, 132.0, 131.9, 131.8, 128.7, 127.7, 127.6, 127.2, 126.4, 125.2, 121.9, 60.9, 60.7, 44.3, 22.7, 14.27, 14.25; **HRMS** (ESI) Calcd for C<sub>23</sub>H<sub>24</sub>O<sub>5</sub> [M + H]<sup>+</sup> 381.1697, found 381.1692

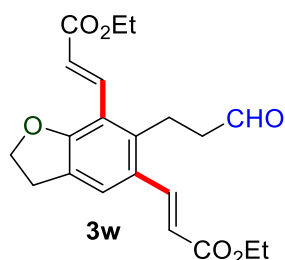

**Diethyl 3,3'-(6-(3-oxopropyl)-2,3-dihydrobenzofuran-5,7-diyl)(2E,2'E)-diacrylate (3w):**

Olefination was done by *general procedure (E)* with 3-(2,3-dihydrobenzofuran-6-yl)propanal (0.0264g, 0.15 mmol) as the substrate and ethyl acrylate (50 μL, 3 equiv., 0.45 mmol) as olefin partner. The crude product was purified via using flash chromatography; Eluent: (18 % EtOAc /82% hexane); Appearance: off white solid; isolated yield: 61 %; m.p. 140-143 °C; **<sup>1</sup>H NMR** (400 MHz, CDCl<sub>3</sub>): δ 9.81 (s, 1H), 7.96-7.92 (m, 2H)\*, 7.0 (s, 1H), 6.32 (d, *J* = 15.7 Hz, 1H), 6.17 (d, *J* = 15.7 Hz, 1H), 4.61 (t, *J* = 8.6 Hz, 2H), 4.32-4.26 (m, 4H), 3.32 (t, *J* = 8.4 Hz, 2H), 3.13 (t, *J* = 8.4 Hz, 2H), 2.63 (t, *J* = 7.6 Hz, 2H), 1.38-1.34 (m, 6H); **<sup>13</sup>C NMR** (100 MHz, CDCl<sub>3</sub>): δ 200.2, 166.5, 166.3, 159.2, 141.5, 141.0, 134.0, 131.6, 131.3, 128.6, 124.0, 121.0, 108.2, 71.2, 60.8, 60.6, 44.9, 30.9, 21.3, 14.23, 14.21; **IR** (KBr): 2981, 1713, 1627, 1600, 1306, 1178, 1035, 978, 868 cm<sup>-1</sup>; **HRMS** (ESI) Calcd for C<sub>21</sub>H<sub>24</sub>O<sub>6</sub> [M + H]<sup>+</sup> 373.1646, found 373.1642. \* = at δ 7.96 two alkene proton merged.

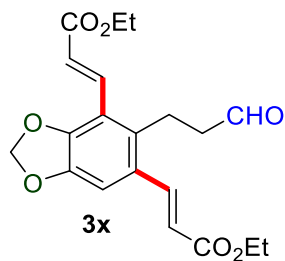

**diethyl 3,3'-(5-(3-oxopropyl)benzo[d][1,3]dioxole-4,6-diyl)(2E,2'E)-diacrylate (3x):**

Olefination was done by *general procedure (E)* with 3-(benzo[d][1,3]dioxol-5-yl)propanal (0.0267 g, 0.15 mmol) as the substrate and ethyl acrylate (50  $\mu$ L, 3 equiv., 0.45 mmol) as olefin partner. The crude product was purified via using flash chromatography; Eluent: (30 % EtOAc /70% hexane); Appearance: off white solid; isolated yield: 83%; m.p. 175-177  $^{\circ}$ C;  $^1\text{H NMR}$  (400 MHz,  $\text{CDCl}_3$ ):  $\delta$  9.80 (s, 1H), 7.92 (d,  $J = 15.7$  Hz, 1H), 7.73 (d,  $J = 15.7$  Hz, 1H), 7.04 (s, 1H), 6.78 (d,  $J = 15.7$  Hz, 1H), 6.23 (d,  $J = 15.7$  Hz, 1H), 6.09 (s, 2H), 4.30-4.23 (m, 4H), 3.19 (t,  $J = 8.2$  Hz, 2H), 2.65 (t,  $J = 8.2$  Hz, 2H), 1.35-1.32 (m, 6H);  $^{13}\text{C NMR}$  (100 MHz,  $\text{CDCl}_3$ ):  $\delta$  199.9, 167.0, 166.7, 148.7, 146.8, 141.1, 135.4, 133.9, 127.5, 124.2, 119.7, 116.3, 107.4, 101.8, 60.7, 60.6, 45.0, 20.9, 14.3; **IR** (KBr): 2986, 2900, 1711, 1625, 1466, 1312, 1185, 1077, 1036, 977, 867  $\text{cm}^{-1}$ ; **HRMS** (ESI) Calcd for  $\text{C}_{20}\text{H}_{22}\text{O}_7$  [ $\text{M} + \text{H}$ ] $^{+}$  375.1438, found 375.1437.

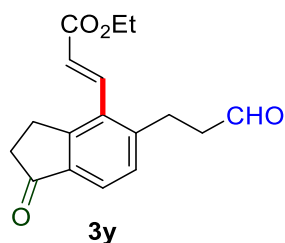

**ethyl (E)-3-(1-oxo-5-(3-oxopropyl)-2,3-dihydro-1H-inden-4-yl)acrylate (3y):** Olefination was done by *general procedure (E)* with 3-(1-oxo-2,3-dihydro-1H-inden-5-yl)propanal (0.0282 g, 0.15 mmol) as the substrate and ethyl acrylate (50  $\mu$ L, 3 equiv., 0.45 mmol) as olefin partner. The crude product was purified via using flash chromatography; Eluent: (16% EtOAc /84% hexane); Appearance: off white solid; isolated yield: 31%; m.p. 127-130  $^{\circ}$ C;  $^1\text{H NMR}$  (400 MHz,  $\text{CDCl}_3$ ):  $\delta$  9.84 (s, 1H), 7.91 (d,  $J = 16.4$  Hz, 1H), 7.72 (d,  $J = 7.9$  Hz, 1H), 7.32 (d,  $J = 7.9$  Hz, 1H), 6.33 (d,  $J = 16.4$  Hz, 1H), 4.32 (q,  $J = 7.1$  Hz, 2H), 3.21 (t,  $J = 5.7$  Hz, 2H), 3.17 (t,  $J = 7.5$  Hz, 2H), 2.81 (t,  $J = 7.5$  Hz, 2H), 2.75-2.72 (m, 2H), 1.38 (t,  $J = 7.2$  Hz, 3H);  $^{13}\text{C NMR}$  (100 MHz,  $\text{CDCl}_3$ ):  $\delta$  205.9, 200.0, 166.3, 154.3, 146.8, 139.5, 136.4, 132.0, 129.5, 124.6, 124.5, 60.9, 44.4, 36.4, 26.6, 26.1, 14.3; **IR** (KBr): 2834, 2733, 1710, 1695, 1606, 1120, 978, 864  $\text{cm}^{-1}$ ; **HRMS** (ESI) Calcd for  $\text{C}_{17}\text{H}_{18}\text{O}_4$  [ $\text{M} + \text{H}$ ] $^{+}$  287.1278, found 287.1275. *We were unable to isolate di product due to low yield and very close Rf with its side product i.e. cyclic aldehyde (CA).*

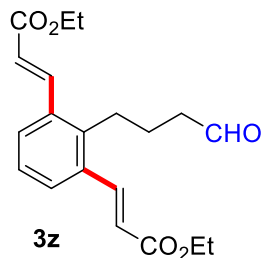

**diethyl 3,3'-(2-(4-oxobutyl)-1,3-phenylene)(2E,2'E)-diacrylate (3z):** Olefination was done by *general procedure (E)* with 4-phenylbutanal (0.0222 g, 0.15 mmol) as the substrate and ethyl acrylate (50  $\mu$ L, 3 equiv., 0.45 mmol) as olefin partner. The crude product was purified via using flash chromatography; Eluent: (14 % EtOAc /86% hexane); Appearance: colorless viscous oil; isolated yield: 19%. **<sup>1</sup>H NMR** (400 MHz, CDCl<sub>3</sub>):  $\delta$  9.79 (s, 1H), 8.05 (d,  $J$  = 15.7 Hz, 2H), 7.57 (d,  $J$  = 7.8 Hz, 2H), 7.28 (t,  $J$  = 7.8 Hz, 1H), 6.36 (d,  $J$  = 15.7 Hz, 2H), 4.29 (q,  $J$  = 7.1 Hz, 4H), 2.92-2.89 (m, 2H), 2.55 (dd,  $J$  = 7.1, 1.1 Hz, 2H), 1.87-1.80 (m, 2H), 1.36 (t,  $J$  = 7.2 Hz, 6H); **<sup>13</sup>C NMR** (100 MHz, CDCl<sub>3</sub>):  $\delta$  201.3, 166.7, 141.9, 140.1, 134.4, 128.5, 127.0, 121.4, 60.7, 43.2, 28.1, 23.4, 14.3; **IR** (KBr): 2986, 1714, 1626, 1474, 1170, 1031, 986, 977, 765, 701  $\text{cm}^{-1}$ ; **HRMS** (ESI) Calcd for C<sub>20</sub>H<sub>24</sub>O<sub>5</sub> [M + H]<sup>+</sup> 345.1697, found 345.1692

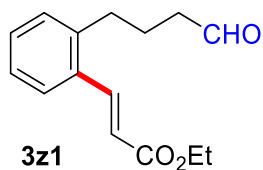

**ethyl (E)-3-(2-(4-oxobutyl)phenyl)acrylate (3z1):** The crude product was purified via using flash chromatography; Eluent: (9% EtOAc /91% hexane); Appearance: viscous oil; isolated yield: 23%. **<sup>1</sup>H NMR** (400 MHz, CDCl<sub>3</sub>):  $\delta$  9.77 (s, 1H), 8.00 (d,  $J$  = 15.8 Hz, 1H), 7.57 (d,  $J$  = 7.7 Hz, 1H), 7.31 (t,  $J$  = 7.4 Hz, 1H), 7.27 – 7.24 (m, 1H), 7.20 (t,  $J$  = 6.8 Hz, 1H), 6.38 (d,  $J$  = 15.8 Hz, 1H), 4.28 (q,  $J$  = 7.1 Hz, 2H), 2.80 (t,  $J$  = 7.2 Hz, 2H), 2.49 (t,  $J$  = 7.2 Hz, 2H), 1.95 – 1.88 (m, 2H), 1.35 (t,  $J$  = 7.1 Hz, 3H); **<sup>13</sup>C NMR** (100 MHz, CDCl<sub>3</sub>):  $\delta$  201.9, 167.1, 141.8, 141.0, 133.2, 130.2, 126.9, 126.8, 120.0, 60.7, 43.2, 32.4, 23.8, 14.4; **HRMS** (ESI) Calcd for C<sub>15</sub>H<sub>18</sub>O<sub>3</sub> [M + H]<sup>+</sup> 247.1254, found 247.1255

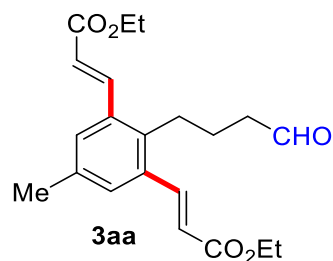

**diethyl 3,3'-(5-methyl-2-(4-oxobutyl)-1,3-phenylene)(2E,2'E)-diacrylate (3aa):** Olefination was done by *general procedure (E)* with 4-(p-tolyl)butanal (0.0243g, 0.15 mmol) as the substrate and ethyl acrylate (50 $\mu$ L, 3 equiv., 0.45 mmol) as olefin partner. The crude product was purified via using flash chromatography; Eluent: (17 % EtOAc /88% hexane); Appearance: light yellow viscous oil; isolated yield: 17%. **<sup>1</sup>H NMR** (400 MHz, CDCl<sub>3</sub>):  $\delta$  9.78 (s, 1H), 8.03 (d,  $J$  = 15.7 Hz, 2H), 7.40 (s, 2H), 6.35 (d,  $J$  = 15.7 Hz, 2H), 4.29 (q,  $J$  = 7.1 Hz, 4H), 2.87 (t,  $J$  = 8.2 Hz, 2H), 2.51 (dd,  $J$  = 6.3, 1.1 Hz, 2H), 2.35 (s, 3H), 1.84-1.77 (m, 2H), 1.35 (t,  $J$  = 7.2 Hz, 6H); **<sup>13</sup>C NMR** (100 MHz, CDCl<sub>3</sub>):  $\delta$  201.4, 166.7, 142.0, 137.3, 136.5, 134.3, 129.3, 121.1, 60.6, 43.2, 27.7, 23.6, 20.9, 14.3; **IR** (KBr): 2982, 1718, 1620, 1477, 1182, 1035, 976, 760, cm<sup>-1</sup>; **HRMS** (ESI) Calcd for C<sub>21</sub>H<sub>26</sub>O<sub>5</sub> [M + H]<sup>+</sup> 359.1853, found 359.1850

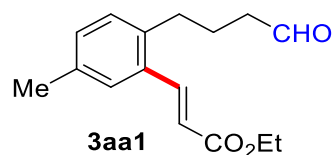

**ethyl (E)-3-(5-methyl-2-(4-oxobutyl)phenyl)acrylate (3aa1):** The crude product was purified via using flash chromatography; Eluent: (9% EtOAc /91% hexane); Appearance: light yellow viscous oil; isolated yield: 23%. **<sup>1</sup>H NMR** (400 MHz, CDCl<sub>3</sub>):  $\delta$  9.78 (s, 1H), 7.98 (d,  $J$  = 15.7 Hz, 1H), 7.41 (s, 1H), 7.16-7.09 (m, 2H), 6.39 (d,  $J$  = 15.7 Hz, 1H), 4.29 (q,  $J$  = 7.1 Hz, 2H), 2.78 (t,  $J$  = 7.5 Hz, 2H), 2.50 (dd,  $J$  = 7.3, 1.3 Hz, 2H), 2.36 (s, 3H), 1.94-1.87 (m, 2H), 1.37 (t,  $J$  = 7.2 Hz, 3H); **<sup>13</sup>C NMR** (100 MHz, CDCl<sub>3</sub>):  $\delta$  201.9, 167.0, 141.8, 137.9, 136.3, 132.8, 130.9, 130.0, 127.2, 119.5, 60.5, 43.1, 31.9, 23.8, 20.9, 14.3; **HRMS** (ESI) Calcd for C<sub>16</sub>H<sub>20</sub>O<sub>3</sub> [M + H]<sup>+</sup> 261.1320, found 261.1318

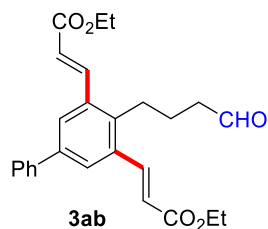

**diethyl 3,3'-(4-(4-oxobutyl)-[1,1'-biphenyl]-3,5-diyl)(2E,2'E)-diacrylate (3ab):** Olefination was done by *general procedure (E)* with 4-([1,1'-biphenyl]-4-yl)butanal (0.0336 g, 0.15 mmol) as the substrate and ethyl acrylate (50  $\mu$ L, 3 equiv., 0.45 mmol) as olefin partner. The crude product was purified via using flash chromatography; Eluent: (11 % EtOAc /89% hexane); Appearance: light yellow solid; isolated yield: 20%; m.p. 107-110  $^{\circ}$ C;  $^1\text{H NMR}$  (400 MHz,  $\text{CDCl}_3$ ):  $\delta$  9.81 (s, 1H), 8.10 (d,  $J = 15.7$  Hz, 2H), 7.78 (s, 2H), 7.59 (dt,  $J = 8.1, 1.9$  Hz, 2H), 7.46 (td,  $J = 6.7, 1.6$  Hz, 2H), 7.41-7.36 (m, 1H), 6.44 (d,  $J = 15.7$  Hz, 2H), 4.29 (t,  $J = 7.1$  Hz, 4H), 2.99-2.89 (m, 2H), 2.57 (t,  $J = 6.6$  Hz, 2H), 1.90-1.82 (m, 2H), 1.36 (t,  $J = 7.1$  Hz, 6H);  $^{13}\text{C NMR}$  (100 MHz,  $\text{CDCl}_3$ ):  $\delta$ ; 201.4, 166.6, 141.9, 139.9, 139.7, 139.0, 134.9, 128.9, 127.8, 127.1, 126.9, 121.6, 60.7, 43.2, 27.9, 23.4 and 14.3; **IR** (KBr): 2980, 1718, 1630, 1308, 1172, 1034, 974, 857, 765, 700  $\text{cm}^{-1}$ ; **HRMS** (ESI) Calcd for  $\text{C}_{26}\text{H}_{28}\text{O}_5$   $[\text{M} + \text{H}]^+$  421.2010, found 421.2009

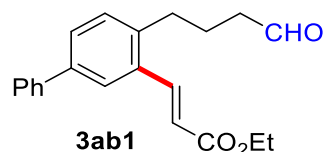

**ethyl (E)-3-(4-(4-oxobutyl)-[1,1'-biphenyl]-3-yl)acrylate (3ab1):** The crude product was purified via using flash chromatography; Eluent: (9% EtOAc /91% hexane); Appearance: light yellow viscous oil; isolated yield: 29%.  $^1\text{H NMR}$  (400 MHz,  $\text{CDCl}_3$ ):  $\delta$  9.79 (s, 1H), 8.04 (d,  $J = 15.8$  Hz, 1H), 7.79 (d,  $J = 2.0$  Hz, 1H), 7.60-7.57 (m, 2H), 7.54 (dd,  $J = 7.9, 2.0$  Hz, 1H), 7.47-7.42 (m, 2H), 7.38-7.33 (m, 1H), 7.27(d,  $J = 7.9$  Hz, 1H), 6.46 (d,  $J = 15.8$  Hz, 1H), 4.29 (q,  $J = 7.1$  Hz, 2H), 2.84 (dd,  $J = 8.6, 6.9$  Hz, 2H), 2.52 (td,  $J = 7.2, 1.5$  Hz, 2H), 1.99-1.91 (m, 2H), 1.36 (t,  $J = 7.1$  Hz, 3H);  $^{13}\text{C NMR}$  (100 MHz,  $\text{CDCl}_3$ ):  $\delta$  201.8, 166.9, 141.7, 140.3, 139.84, 139.82, 133.5, 130.6, 128.83, 128.75, 127.5, 127.0, 125.4, 120.2, 60.6, 43.1, 32.0, 23.6, 14.3; **HRMS** (ESI) Calcd for  $\text{C}_{21}\text{H}_{22}\text{O}_3$   $[\text{M} + \text{H}]^+$  323.1642, found 323.1642



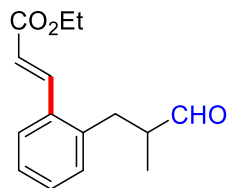

**3ae**

**ethyl (E)-3-(2-(2-methyl-3-oxopropyl)phenyl)acrylate** : The crude product was purified via using flash chromatography; Eluent: (4% EtOAc /96% hexane); Appearance: light yellow viscous oil; isolated yield: 12%.  $^1\text{H NMR}$  (400 MHz,  $\text{CDCl}_3$ ): 9.70 (s, 1H), 7.96 (d,  $J = 15.8$  Hz, 1H), 7.56 (d,  $J = 8.3$  Hz, 1H), 7.33 – 7.20 (m, 2H), 7.18 (d,  $J = 7.4$  Hz, 1H), 6.36 (d,  $J = 15.7$  Hz, 1H), 4.26 (q,  $J = 7.1$  Hz, 2H), 3.25 (dd,  $J = 14.0, 6.1$  Hz, 1H), 2.71 (dd,  $J = 13.9, 8.2$  Hz, 1H), 2.67–2.58 (m, 1H), 1.33 (t,  $J = 7.1$  Hz, 3H), 1.08 (d,  $J = 7.0$  Hz, 3H);  $^{13}\text{C NMR}$  (100 MHz,  $\text{CDCl}_3$ ):  $\delta$  203.6, 166.8, 141.5, 138.5, 133.4, 130.8, 130.0, 127.1, 126.9, 120.2, 60.6, 47.8, 33.6, 14.3, 13.3; **HRMS** (ESI) Calcd for  $\text{C}_{15}\text{H}_{18}\text{O}_3$   $[\text{M} + \text{H}]^+$  247.1256, found 247.1251 The observed  $^1\text{H}$  and  $^{13}\text{C}$  NMR values were in consistent with previously reported literature<sup>17b</sup>.

#### Experimental data for remote C-H di-olefination with acrylates:

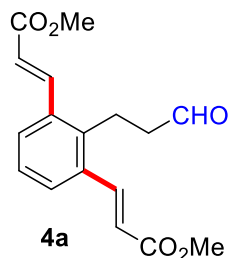

**4a**

**dimethyl 3,3'-(2-(3-oxopropyl)-1,3-phenylene)(2E,2'E)-diacrylate (4a)**: Olefination was done by *general procedure (E)* with 3-phenylpropanal (0.0201g, 0.15 mmol) as the substrate and methyl acrylate (43  $\mu\text{L}$ , 3 equiv., 0.45 mmol) as olefin partner. The crude product was purified via using flash chromatography; Eluent: (15% EtOAc /85% hexane); Appearance: off white solid; isolated yield: 66%; m.p. 65-67°C;  $^1\text{H NMR}$  (400 MHz,  $\text{CDCl}_3$ ):  $\delta$  9.81 (s, 1H), 8.00 (d,  $J = 15.7$  Hz, 2H), 7.57 (d,  $J = 7.8$  Hz, 2H), 7.31 (t,  $J = 7.7$  Hz, 1H), 6.36 (d,  $J = 15.7$  Hz, 2H), 3.83 (s, 6H), 3.21 (t,  $J = 8.2$  Hz, 2H), 2.67 (t,  $J = 8.2$  Hz, 2H);  $^{13}\text{C NMR}$  (100 MHz,  $\text{CDCl}_3$ ):  $\delta$  199.9, 166.8, 141.6, 138.8, 134.4, 128.7, 127.3, 121.4, 51.8, 44.5, 21.2; **IR** (KBr): 2963, 1716, 1630, 1474, 1170, 971, 867,  $\text{cm}^{-1}$ ; **HRMS** (ESI) Calcd for  $\text{C}_{17}\text{H}_{18}\text{O}_5$   $[\text{M} + \text{H}]^+$  303.1227, found 303.1223

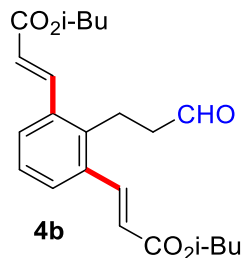

**diisobutyl 3,3'-(2-(3-oxopropyl)-1,3-phenylene)(2E,2'E)-diacrylate (4b):** Olefination was done by *general procedure (E)* with 3-phenylpropanal (0.0201 g, 0.15 mmol) as the substrate and isobutyl acrylate (65  $\mu$ L, 3 equiv., 0.45 mmol) as olefin partner. The crude product was purified via using flash chromatography; Eluent: (10% EtOAc /90% hexane); Appearance: off white solid; isolated yield: 71%; m.p. 59-61°C;  **$^1\text{H NMR}$**  (400 MHz,  $\text{CDCl}_3$ ):  $\delta$  9.82 (s, 1H), 8.02 (d,  $J = 15.7$  Hz, 2H), 7.59 (d,  $J = 7.8$  Hz, 2H), 7.32 (t,  $J = 7.7$  Hz, 1H), 6.39 (d,  $J = 15.7$  Hz, 2H), 4.02 (d,  $J = 6.7$  Hz, 4H), 3.23 (t,  $J = 8.2$  Hz, 2H), 2.68 (t,  $J = 8.2$  Hz, 2H), 2.09-1.98 (m, 2H), 1.00 (d,  $J = 6.7$  Hz, 12H);  **$^{13}\text{C NMR}$**  (100 MHz,  $\text{CDCl}_3$ ):  $\delta$  199.8, 166.5, 141.4, 138.7, 134.4, 128.7, 127.2, 121.8, 70.8, 44.6, 27.8, 21.2, 19.1; **IR** (KBr): 2959, 1714, 1628, 1472, 1314, 1171, 1011, 973, 865, 806  $\text{cm}^{-1}$ ; **HRMS** (ESI) Calcd for  $\text{C}_{23}\text{H}_{30}\text{O}_5$   $[\text{M} + \text{H}]^+$  387.2166, found 387.2160

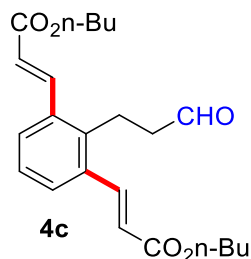

**dibutyl 3,3'-(2-(3-oxopropyl)-1,3-phenylene)(2E,2'E)-diacrylate (4c):** Olefination was done by *general procedure (E)* with 3-phenylpropanal (0.0201g, 0.15 mmol) as the substrate and n-butyl acrylate (65 $\mu$ L, 3 equiv., 0.45 mmol) as olefin partner. The crude product was purified via using flash chromatography; Eluent: (9% EtOAc /91% hexane); Appearance: light yellow viscous oil; isolated yield: 70%.  **$^1\text{H NMR}$**  (400 MHz,  $\text{CDCl}_3$ ):  $\delta$  9.81 (s, 1H), 7.99 (d,  $J = 15.7$  Hz, 2H), 7.58 (d,  $J = 7.8$  Hz, 2H), 7.31 (t,  $J = 7.7$  Hz, 1H), 6.37 (d,  $J = 15.7$  Hz, 2H), 4.23 (t,  $J = 6.7$  Hz, 4H), 3.22 (t,  $J = 8.2$  Hz, 2H), 2.67 (t,  $J = 8.2$  Hz, 2H), 1.74-1.67 (m, 4H), 1.50-1.40 (m, 4H), 0.98 (d,  $J = 7.4$  Hz, 6H);  **$^{13}\text{C NMR}$**  (100 MHz,  $\text{CDCl}_3$ ):  $\delta$  199.9, 166.6, 141.4, 138.8, 134.5, 128.7, 127.3, 121.8, 64.7, 44.6, 30.7, 21.3, 19.2, 13.7; **HRMS** (ESI) Calcd for  $\text{C}_{23}\text{H}_{30}\text{O}_5$   $[\text{M} + \text{H}]^+$  387.2153, found 387.2159

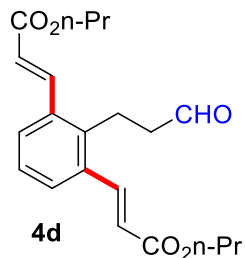

**dipropyl 3,3'-(2-(3-oxopropyl)-1,3-phenylene)(2E,2'E)-diacrylate (4d):** Olefination was done by *general procedure (E)* with 3-phenylpropanal (0.0201 g, 0.15 mmol) as the substrate and n-propyl acrylate (57  $\mu$ L, 3 equiv., 0.45 mmol) as olefin partner. The crude product was purified via using flash chromatography; Eluent: (10% EtOAc /90% hexane); Appearance: light yellow viscous oil; isolated yield: 63%. **<sup>1</sup>H NMR** (400 MHz, CDCl<sub>3</sub>):  $\delta$  9.81 (s, 1H), 7.99 (d,  $J$  = 15.7 Hz, 2H), 7.58 (d,  $J$  = 7.8 Hz, 2H), 7.30 (t,  $J$  = 7.7 Hz, 1H), 6.37 (d,  $J$  = 15.7 Hz, 2H), 4.19 (t,  $J$  = 6.7 Hz, 4H), 3.22 (t,  $J$  = 8.2 Hz, 2H), 2.67 (t,  $J$  = 8.2 Hz, 2H), 1.79-1.70 (m, 4H), 1.00 (d,  $J$  = 7.4 Hz, 6H); **<sup>13</sup>C NMR** (100 MHz, CDCl<sub>3</sub>):  $\delta$  199.8, 166.5, 141.4, 138.7, 134.4, 128.6, 127.2, 121.8, 66.3, 44.5, 22.0, 21.2, 10.4; **HRMS** (ESI) Calcd for C<sub>21</sub>H<sub>26</sub>O<sub>5</sub> [M + H]<sup>+</sup> 359.1853, found 359.1848

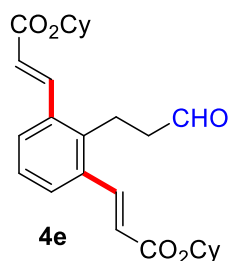

**dicyclohexyl 3,3'-(2-(3-oxopropyl)-1,3-phenylene)(2E,2'E)-diacrylate (4e):** Olefination was done by *general procedure (E)* with 3-phenylpropanal (0.0201 g, 0.15 mmol) as the substrate and cyclohexyl acrylate (71  $\mu$ L, 3 equiv., 0.45 mmol) as olefin partner. The crude product was purified via using flash chromatography; Eluent: (7% EtOAc /93% hexane); Appearance: light yellow viscous oil; isolated yield: 69%. **<sup>1</sup>H NMR** (400 MHz, CDCl<sub>3</sub>):  $\delta$  9.82 (s, 1H), 7.99 (d,  $J$  = 15.7 Hz, 2H), 7.58 (d,  $J$  = 7.8 Hz, 2H), 7.29 (t,  $J$  = 7.7 Hz, 1H), 6.37 (d,  $J$  = 15.7 Hz, 2H), 4.94-4.88 (m, 2H), 3.24 (t,  $J$  = 8.2 Hz, 2H), 2.68 (t,  $J$  = 8.2 Hz, 2H), 1.94-1.92 (m, 4H), 1.80-1.77 (m, 4H), 1.60-1.30 (m, 12H); **<sup>13</sup>C NMR** (100 MHz, CDCl<sub>3</sub>):  $\delta$  199.9, 166.9, 141.1, 138.7, 134.5, 128.6, 127.2, 122.3, 72.9, 44.6, 31.6, 25.4, 23.7, 21.2; **HRMS** (ESI) Calcd for C<sub>27</sub>H<sub>34</sub>O<sub>5</sub> [M + H]<sup>+</sup> 439.2479, found ]<sup>+</sup> 439.2473

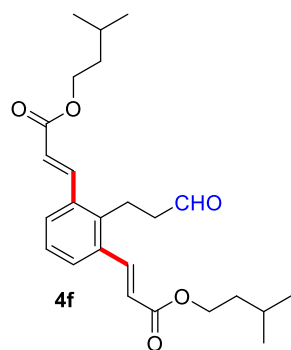

**diisopentyl 3,3'-(2-(3-oxopropyl)-1,3-phenylene)(2E,2'E)-diacrylate (4f):** Olefination was done by *general procedure (E)* with 3-phenylpropanal (0.0201 g, 0.15 mmol) as the substrate and isopentyl acrylate (72  $\mu$ L, 3 equiv., 0.45 mmol) as olefin partner. The crude product was purified via using flash chromatography; Eluent: (8% EtOAc /92% hexane); Appearance: light yellow viscous oil; isolated yield: 68%. **<sup>1</sup>H NMR** (400 MHz, CDCl<sub>3</sub>):  $\delta$  9.81 (s, 1H), 7.98 (d,  $J$  = 15.7 Hz, 2H), 7.57 (d,  $J$  = 7.8 Hz, 2H), 7.30 (t,  $J$  = 7.7 Hz, 1H), 6.35 (d,  $J$  = 15.7 Hz, 2H), 4.25 (t,  $J$  = 6.7 Hz, 4H), 3.20 (t,  $J$  = 8.2 Hz, 2H), 2.66 (t,  $J$  = 8.2 Hz, 2H), 1.80-1.70 (m, 2H), 1.64 (q,  $J$  = 6.9 Hz, 4H), 0.96 (d,  $J$  = 6.6 Hz, 12H); **<sup>13</sup>C NMR** (100 MHz, CDCl<sub>3</sub>):  $\delta$  199.7, 166.5, 141.3, 138.7, 134.4, 128.6, 127.2, 121.8, 63.4, 44.5, 37.3, 25.1, 22.4, 21.2; **HRMS** (ESI) Calcd for C<sub>25</sub>H<sub>34</sub>O<sub>5</sub> [M + H]<sup>+</sup> 415.2479, found 415.2474

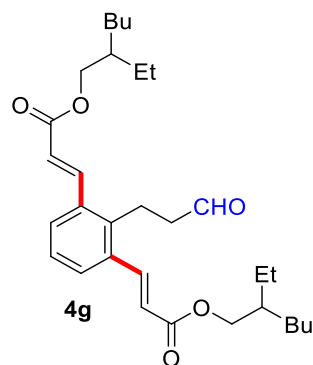

**bis(2-ethylhexyl) 3,3'-(2-(3-oxopropyl)-1,3-phenylene)(2E,2'E)-diacrylate (4g):** Olefination was done by *general procedure (E)* with 3-phenylpropanal (0.0201 g, 0.15 mmol) as the substrate and 2-ethylhexyl acrylate (92  $\mu$ L, 3 equiv., 0.45 mmol) as olefin partner. The crude product was purified via using flash chromatography; Eluent: (7% EtOAc /93% hexane); Appearance: light yellow viscous oil; isolated yield: 72% with amine A<sub>2</sub> or 40.0 % with amine A<sub>1</sub> **<sup>1</sup>H NMR** (400 MHz, C<sub>3</sub>D<sub>6</sub>O):  $\delta$  9.82 (s, 1H), 8.06 (d,  $J$  = 15.7 Hz, 2H), 7.77 (d,  $J$  = 7.8 Hz, 2H), 7.39 (t,  $J$  = 7.7

Hz, 1H), 6.47 (d,  $J = 15.7$  Hz, 2H), 4.17-4.09 (m, 4H), 3.24 (t,  $J = 7.6$  Hz, 2H), 2.76 (t,  $J = 7.6$  Hz, 2H), 1.70-1.64 (m, 2H), 1.48-1.34 (m, 16H), 0.96-0.90 (m, 12H);  $^{13}\text{C}$  NMR (100 MHz,  $\text{C}_3\text{D}_6\text{O}$ ):  $\delta$  199.8, 166.9, 141.3, 139.3, 134.4, 128.7, 127.3, 121.4, 66.3, 44.3, 38.9, 30.4, 28.8, 23.7, 22.8, 20.9, 13.5, 10.5; HRMS (ESI) Calcd for  $\text{C}_{31}\text{H}_{46}\text{O}_5$   $[\text{M} + \text{H}]^+$  499.3418, found 499.3409

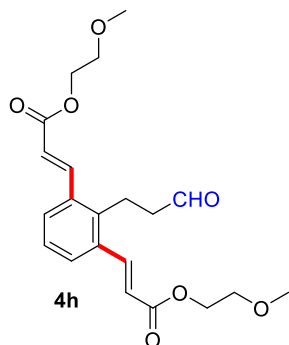

**bis(2-methoxyethyl) 3,3'-(2-(3-oxopropyl)-1,3-phenylene)(2E,2'E)-diacrylate (4h):**

Olefination was done by *general procedure (E)* with 3-phenylpropanal (0.0201 g, 0.15 mmol) as the substrate and 2-methoxyethyl acrylate (58  $\mu\text{L}$ , 3 equiv., 0.45 mmol) as olefin partner. The crude product was purified via using flash chromatography; Eluent: (47% EtOAc /53% hexane); Appearance: off white solid; isolated yield: 62%; m.p. 67-68 $^\circ\text{C}$ ;  $^1\text{H}$  NMR (400 MHz,  $\text{CDCl}_3$ ):  $\delta$  9.80 (s, 1H), 8.01 (d,  $J = 15.7$  Hz, 2H), 7.56 (d,  $J = 7.8$  Hz, 2H), 7.29 (t,  $J = 7.7$  Hz, 1H), 6.42 (d,  $J = 15.7$  Hz, 2H), 4.39-4.38 (m, 4H), 3.69-3.67 (d,  $J = 4.6$  Hz, 4H), 3.43 (s, 6H), 3.21 (t,  $J = 7.6$  Hz, 2H), 2.66 (t,  $J = 7.6$  Hz, 2H);  $^{13}\text{C}$  NMR (100 MHz,  $\text{CDCl}_3$ ):  $\delta$  199.8, 166.4, 141.9, 138.9, 134.3, 128.7, 127.2, 121.3, 70.4, 63.7, 59.0, 44.5, 21.2; HRMS (ESI) Calcd for  $\text{C}_{21}\text{H}_{26}\text{O}_7$   $[\text{M} + \text{H}]^+$  391.1751, found 391.1746

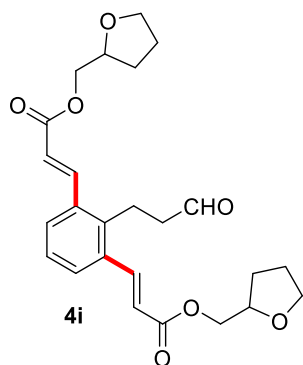

**bis((tetrahydrofuran-2-yl)methyl) 3,3'-(2-(3-oxopropyl)-1,3-phenylene)(2E,2'E)-diacrylate (4i):**

Olefination was done by *general procedure (E)* with 3-phenylpropanal (0.0201 g, 0.15 mmol)

as the substrate and tetrahydro-2-furanylmethyl acrylate (70  $\mu$ L, 3 equiv., 0.45 mmol) as olefin partner. The crude product was purified via using flash chromatography; Eluent: (45% EtOAc /55% hexane); Appearance: off white solid; isolated yield: 60%; m.p. 53-55°C;  **$^1\text{H NMR}$**  (400 MHz,  $\text{CDCl}_3$ ):  $\delta$  9.80 (s, 1H), 8.02 (d,  $J = 15.7$  Hz, 2H), 7.56(d,  $J = 7.8$  Hz, 2H), 7.30 (t,  $J = 7.7$  Hz, 1H), 6.41 (d,  $J = 15.7$  Hz, 2H), 4.31 (dd,  $J = 10.9, 2.9$  Hz, 2H), 4.24-4.12 (m, 4H), 3.95-3.90 (m, 2H), 3.86-3.80 (m, 2H), 3.20 (t,  $J = 7.6$  Hz, 2H), 2.66 (t,  $J = 7.6$  Hz, 2H), 2.09-2.01 (m, 2H), 1.99-1.89 (m, 4H), 1.71-1.62 (m, 2H);  **$^{13}\text{C NMR}$**  (100 MHz,  $\text{CDCl}_3$ ):  $\delta$  199.7, 166.3, 141.9, 138.8, 134.3, 128.7, 127.3, 121.3, 76.5, 68.4, 66.7, 44.5, 28.0, 25.6, 21.2; **HRMS** (ESI) Calcd for  $\text{C}_{25}\text{H}_{30}\text{O}_7$  [ $\text{M} + \text{H}$ ] $^+$  443.2064, found 443.2058

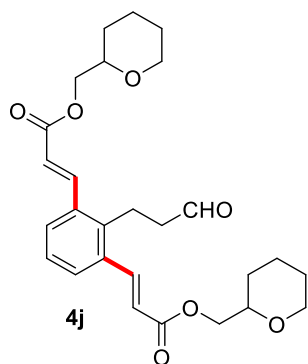

**bis((tetrahydro-2H-pyran-2-yl)methyl) 3,3'-(2-(3-oxopropyl)-1,3-phenylene)(2E,2'E)-diacrylate (4j)**: Olefination was done by *general procedure (E)* with 3-phenylpropanal (0.0201 g, 0.15 mmol) as the substrate and (tetrahydro-2H-pyran-2-yl)methyl acrylate (0.0766 g, 3 equiv., 0.45 mmol) as olefin partner. The crude product was purified via using flash chromatography; Eluent: (40% EtOAc /60% hexane); Appearance: colorless viscous oil; isolated yield: 70%.  **$^1\text{H NMR}$**  (400 MHz,  $\text{CDCl}_3$ ):  $\delta$  9.77 (s, 1H), 7.99 (d,  $J = 15.7$  Hz, 2H), 7.54 (d,  $J = 7.8$  Hz, 2H), 7.27 (t,  $J = 7.7$  Hz, 1H), 6.40 (d,  $J = 15.7$  Hz, 2H), 4.21 (dd,  $J = 3.3, 3.3$  Hz, 2H), 4.14 (dd,  $J = 6.8, 6.8$  Hz, 2H), 4.03-3.99 (m, 2H), 3.63-3.58 (m, 2H), 3.47-3.42 (m, 2H), 3.18 (t,  $J = 8.1$  Hz, 2H), 2.63 (t,  $J = 8.1$  Hz, 2H), 1.89-1.86 (m, 2H), 1.61-1.50 (m, 8H), 1.41-1.32 (m, 2H);  **$^{13}\text{C NMR}$**  (100 MHz,  $\text{CDCl}_3$ ):  $\delta$  199.7, 166.3, 141.7, 138.8, 134.2, 128.6, 127.1, 121.3, 75.3, 68.3, 67.5, 44.5, 27.7, 25.6, 22.8, 21.0; **HRMS** (ESI) Calcd for  $\text{C}_{27}\text{H}_{34}\text{O}_7$  [ $\text{M} + \text{H}$ ] $^+$  471.2377, found 471.2374

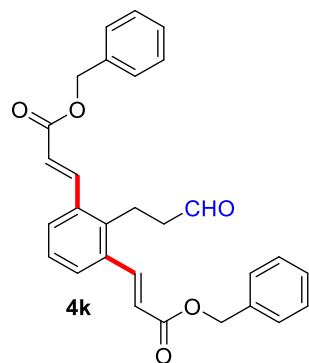

**dibenzyl 3,3'-(2-(3-oxopropyl)-1,3-phenylene)(2E,2'E)-diacrylate (4k):** Olefination was done by *general procedure (E)* with 3-phenylpropanal (0.0201 g, 0.15 mmol) as the substrate and benzyl acrylate (66  $\mu$ L, 3 equiv., 0.45 mmol) as olefin partner. The crude product was purified via using flash chromatography; Eluent: (17% EtOAc /83% hexane); Appearance: viscous oil; isolated yield: 54%.  $^1\text{H NMR}$  (400 MHz,  $\text{CDCl}_3$ ):  $\delta$  9.81 (s, 1H), 8.07 (d,  $J = 15.7$  Hz, 2H), 7.58 (d,  $J = 7.8$  Hz, 2H), 7.47-7.38 (m, 10H), 7.31 (t,  $J = 7.8$  Hz, 1H), 6.43 (d,  $J = 15.7$  Hz, 2H), 5.29 (s, 4H), 3.23 (t,  $J = 8.1$  Hz, 2H), 2.68 (t,  $J = 8.1$  Hz, 2H);  $^{13}\text{C NMR}$  (100 MHz,  $\text{CDCl}_3$ ):  $\delta$  199.8, 166.2, 142.0, 138.9, 135.8, 134.3, 128.8, 128.6, 128.3, 128.2, 127.3, 121.4, 66.5, 44.5, 21.2; **HRMS** (ESI) Calcd for  $\text{C}_{29}\text{H}_{26}\text{O}_5$   $[\text{M} + \text{H}]^+$  455.1853, found 455.1845

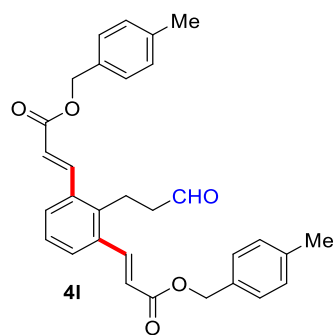

**bis(4-methylbenzyl) 3,3'-(2-(3-oxopropyl)-1,3-phenylene)(2E,2'E)-diacrylate (4l):** Olefination was done by *general procedure (E)* with 3-phenylpropanal (0.0201 g, 0.15 mmol) as the substrate and 4-methylbenzyl acrylate (0.0793 g, 3 equiv., 0.45 mmol) as olefin partner. The crude product was purified via using flash chromatography; Eluent: (15% EtOAc /75% hexane); Appearance: viscous oil; isolated yield: 59%.  $^1\text{H NMR}$  (400 MHz,  $\text{CDCl}_3$ ):  $\delta$  9.77 (s, 1H), 8.02 (d,  $J = 15.7$  Hz, 2H), 7.53 (d,  $J = 7.8$  Hz, 2H), 7.31 (d,  $J = 8.0$  Hz, 4H), 7.25 (t,  $J = 7.7$  Hz, 1H), 7.19 (d,  $J = 8.0$  Hz, 4H), 6.37 (d,  $J = 15.7$  Hz, 2H), 5.21 (s, 4H), 3.18 (t,  $J = 8.1$  Hz, 2H), 2.63 (t,  $J = 8.1$  Hz, 2H),

2.36 (s, 6H);  $^{13}\text{C}$  NMR (100 MHz,  $\text{CDCl}_3$ ):  $\delta$  199.8, 166.2, 141.8, 138.9, 138.2, 134.4, 132.8, 129.2, 128.8, 128.4, 127.2, 121.5, 66.4, 44.5, 21.22, 21.16; HRMS (ESI) Calcd for  $\text{C}_{31}\text{H}_{30}\text{O}_5$  [ $\text{M} + \text{Na}$ ] $^+$  505.1985, found 505.1980

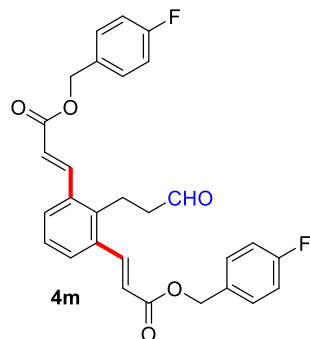

**bis(4-fluorobenzyl) 3,3'-(2-(3-oxopropyl)-1,3-phenylene)(2E,2'E)-diacrylate (4m):**

Olefination was done by *general procedure (E)* with 3-phenylpropanal (0.0201 g, 0.15 mmol) as the substrate and 4-fluorobenzyl acrylate (0.0811 g, 3 equiv., 0.45 mmol) as olefin partner. The crude product was purified via using flash chromatography; Eluent: (17% EtOAc /83% hexane); Appearance: off white solid; isolated yield: 48%; m.p. 93-95°C;  $^1\text{H}$  NMR (400 MHz,  $\text{CDCl}_3$ ):  $\delta$  9.78 (s, 1H), 8.03 (d,  $J = 15.5$  Hz, 2H), 7.55 (d,  $J = 7.6$  Hz, 2H), 7.40 (br, 4H), 7.28 (t,  $J = 7.6$  Hz, 1H), 7.07 (d,  $J = 8.3$  Hz, 4H), 6.38 (d,  $J = 15.5$  Hz, 2H), 5.21 (s, 4H), 3.19 (t,  $J = 8.1$  Hz, 2H), 2.65 (t,  $J = 8.1$  Hz, 2H);  $^{13}\text{C}$  NMR (100 MHz,  $\text{CDCl}_3$ ):  $\delta$  199.7, 166.1, 162.6 (d,  $J_{\text{C-F}} = 244.6$  Hz), 142.0, 139.0, 134.3, 131.7, 130.3 (d,  $J_{\text{C-F}} = 8.2$  Hz), 128.8, 127.3, 121.2, 115.5 (d,  $J_{\text{C-F}} = 21.6$  Hz), 65.8, 44.6, 21.2;  $^{19}\text{F}$  NMR (377 MHz,  $\text{CDCl}_3$ ):  $\delta$  -113.4; IR (KBr): 2957, 1711, 1623, 1603, 1510, 1223, 1152, 969, 829  $\text{cm}^{-1}$ ; HRMS (ESI) Calcd for  $\text{C}_{29}\text{H}_{24}\text{F}_2\text{O}_5$  [ $\text{M} + \text{H}$ ] $^+$  491.1665, found 491.1660

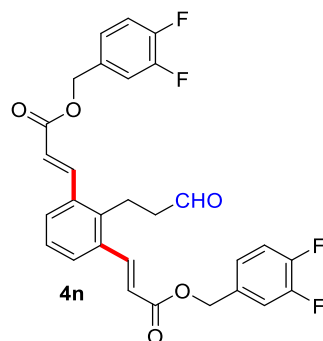

**bis(3,4-difluorobenzyl) 3,3'-(2-(3-oxopropyl)-1,3-phenylene)(2E,2'E)-diacrylate (4n):**

Olefination was done by *general procedure (E)* with 3-phenylpropanal (0.0201 g, 0.15 mmol) as the substrate and 3,4-difluorobenzyl acrylate (0.0892 g, 3 equiv., 0.45 mmol) as olefin partner. The



crude product was purified via using flash chromatography; Eluent: (19% EtOAc /81% hexane); Appearance: off white solid; isolated yield: 50%; m.p. 124-127°C;  $^1\text{H NMR}$  (400 MHz,  $\text{CDCl}_3$ ):  $\delta$  9.81 (s, 1H), 8.07 (d,  $J = 15.5$  Hz, 2H), 7.60 (d,  $J = 7.8$  Hz, 2H), 7.33-7.20 (m, 4H), 7.18-7.16 (m, 3H), 6.41 (d,  $J = 15.5$  Hz, 2H), 5.22 (s, 4H), 3.23 (t,  $J = 8.1$  Hz, 2H), 2.69 (t,  $J = 8.1$  Hz, 2H);  $^{13}\text{C NMR}$  (100 MHz,  $\text{CDCl}_3$ ):  $\delta$  199.7, 166.0, 151.6 (dd,  $J_{\text{C-F}} = 248.6$  Hz,  $J_{2\text{C-F}} = 5.1$ ), 151.5 (dd,  $J_{\text{C-F}} = 248.6$  Hz,  $J_{2\text{C-F}} = 5.1$ ), 142.4, 139.1, 134.3, 132.9 (dd,  $J_{\text{C-F}} = 5.6$  Hz,  $J_{2\text{C-F}} = 3.9$  Hz), 128.9, 127.3, 124.4 (dd,  $J_{\text{C-F}} = 6.5$  Hz,  $J_{2\text{C-F}} = 3.7$  Hz), 121.0, 117.4 (dd,  $J_{\text{C-F}} = 17.6$  Hz,  $J_{2\text{C-F}} = 8.9$  Hz), 65.2, 44.6, 21.2;  $^{19}\text{F NMR}$  (377 MHz,  $\text{CDCl}_3$ ):  $\delta$  -137.1 (d,  $J_{\text{C-F}} = 20.8$  Hz),  $\delta$  -138.1 (d,  $J_{\text{C-F}} = 20.5$  Hz); **IR** (KBr): 2921, 1715, 1625, 1609, 1519, 1318, 1277, 1172, 979, 821  $\text{cm}^{-1}$ ; **HRMS** (ESI) Calcd for  $\text{C}_{29}\text{H}_{22}\text{F}_4\text{O}_5$   $[\text{M} + \text{H}]^+$  527.1476, found 527.1472

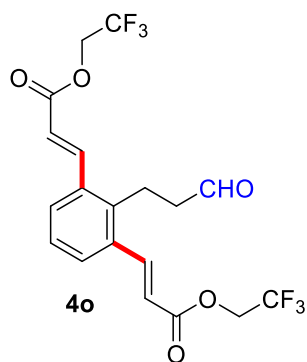

**bis(2,2,2-trifluoroethyl) 3,3'-(2-(3-oxopropyl)-1,3-phenylene)(2E,2'E)-diacrylate (4o):**

Olefination was done by *general procedure (E)* with 3-phenylpropanal (0.0201 g, 0.15 mmol) as the substrate and 2,2,2-trifluoroethyl acrylate (58  $\mu\text{L}$ , 3 equiv., 0.45 mmol) as olefin partner. The crude product was purified via using flash chromatography; Eluent: (13% EtOAc /87% hexane); Appearance: viscous oil; isolated yield: 40%.  $^1\text{H NMR}$  (400 MHz,  $\text{CDCl}_3$ ):  $\delta$  9.80 (s, 1H), 8.12 (d,  $J = 15.5$  Hz, 2H), 7.63 (d,  $J = 7.8$  Hz, 2H), 7.33 (t,  $J = 7.8$  Hz, 1H), 6.43 (d,  $J = 15.5$  Hz, 2H), 4.61 (q,  $J = 8.4$  Hz, 4H); 3.22 (t,  $J = 7.6$  Hz, 2H), 2.69 (t,  $J = 7.6$  Hz, 2H);  $^{13}\text{C NMR}$  (100 MHz,  $\text{CDCl}_3$ ):  $\delta$  199.5, 164.6, 143.8, 139.5, 134.0, 129.3, 127.5, 122.9 (d,  $J_{\text{C-F}} = 277.2$  Hz), 119.5, 60.5 (q,  $J_{\text{C-F}} = 37.0$  Hz), 44.6, 21.2;  $^{19}\text{F NMR}$  (377 MHz,  $\text{CDCl}_3$ ):  $\delta$  -73.7 Hz; **HRMS** (ESI) Calcd for  $\text{C}_{19}\text{H}_{16}\text{F}_6\text{O}_5$   $[\text{M} + \text{H}]^+$  439.0975, found 439.0977.

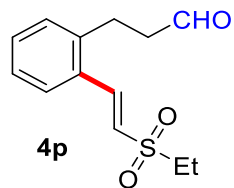

**(E)-3-(2-(2-(ethylsulfonyl)vinyl)phenyl)propanal (4p):** Olefination was done by *general procedure (E)* with 3-phenylpropanal (0.0201 g, 0.15 mmol) as the substrate and (ethylsulfonyl)ethene (47  $\mu$ L, 3 equiv., 0.45 mmol) as olefin partner. The crude product was purified via using flash chromatography; Eluent: (51% EtOAc /49% hexane); Appearance: brownish viscous oil; isolated yield: 42%.  $^1\text{H NMR}$  (400 MHz,  $\text{CDCl}_3$ ):  $\delta$  9.80 (s, 1H), 7.89 (d,  $J$  = 15.2 Hz, 1H), 7.52 (d,  $J$  = 7.8 Hz, 1H), 7.40 (dt,  $J$  = 7.5, 1.3 Hz, 1H), 7.30 (t,  $J$  = 7.5 Hz, 2H), 6.79 (d,  $J$  = 15.2 Hz, 1H), 3.15-3.08 (m, 4H), 2.78 (t,  $J$  = 7.6 Hz, 2H), 1.41 (t,  $J$  = 7.4 Hz, 3H);  $^{13}\text{C NMR}$  (100 MHz,  $\text{CDCl}_3$ ):  $\delta$  200.3, 142.1, 140.4, 131.3, 130.8, 130.1, 127.1, 125.8, 49.2, 44.7, 25.1, 7.2; **HRMS** (ESI) Calcd for  $\text{C}_{13}\text{H}_{16}\text{O}_3\text{S}$  [ $\text{M} + \text{H}$ ] $^+$  253.0893, found 253.0889

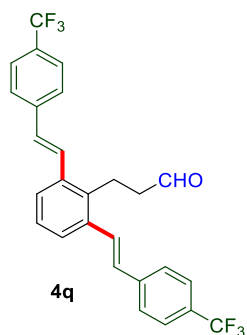

**3-(2,6-bis((E)-4-(trifluoromethyl)styryl)phenyl)propanal:** The crude product was purified *via* using flash chromatography; Eluent: (2% EtOAc /98% Hexane); Appearance: Light yellow solid; isolated yield: 63%; m.p. 173-175 $^\circ\text{C}$ ;  $^1\text{H NMR}$  (400 MHz,  $\text{CDCl}_3$ ): 9.82 (s, 1H), 7.63 – 7.53 (m, 10H), 7.48 (d,  $J$  = 16.0 Hz, 2H), 7.30 (t,  $J$  = 7.8 Hz, 1H), 7.00 (d,  $J$  = 16.0 Hz, 2H), 3.24 (t,  $J$  = 7.8 Hz, 2H), 2.73 (t,  $J$  = 7.8 Hz, 2H);  $^{13}\text{C NMR}$  (100 MHz,  $\text{CDCl}_3$ ):  $\delta$  200.7, 140.7, 136.6, 136.5, 130.5, 129.6 (q,  $J_{\text{C-F}}$  = 32.5 Hz), 128.6, 127.2, 126.7, 126.7, 125.7 (q,  $J_{\text{C-F}}$  = 3.9 Hz), 125.5, 122.8, 44.4, 21.2;  $^{19}\text{F NMR}$  (377 MHz,  $\text{CDCl}_3$ ):  $\delta$  -62.4; **IR** (KBr): 2841, 1721, 1610, 1323, 1168, 1126, 1067, 969, 831 $\text{cm}^{-1}$ ; **HRMS** (ESI) Calcd for  $\text{C}_{27}\text{H}_{20}\text{F}_6\text{O}$  [ $\text{M} + \text{H}$ ] $^+$  475.1417, found 474.1409

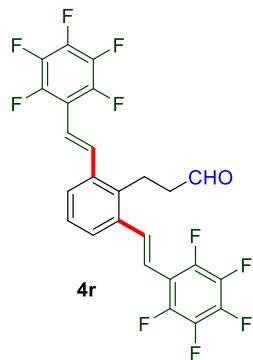

**3-(2,6-bis((E)-2-(perfluorophenyl)vinyl)phenyl)propanal:** The crude product was purified *via* using flash chromatography; Eluent: (1% EtOAc /99% Hexane); Appearance: off white solid; isolated yield: 21%; m.p. 163-165°C;  $^1\text{H NMR}$  (400 MHz,  $\text{CDCl}_3$ ):  $\delta$  9.83 (s, 1H), 7.71 (d,  $J = 16.4$  Hz, 2H), 7.58 (d,  $J = 7.8$  Hz, 2H), 7.35 (t,  $J = 7.8$  Hz, 1H), 6.86 (d,  $J = 16.4$  Hz, 2H), 3.23 – 3.11 (t,  $J = 7.8$  Hz, 2H), 2.71 (t,  $J = 7.8$  Hz, 2H);  $^{13}\text{C NMR}$  (100 MHz,  $\text{CDCl}_3$ ):  $\delta$  200.3, 146.1, 143.6, 141.3, 139.1, 136.9, 136.6, 134.8, 134.8 (t,  $J_{\text{C-F}} = 7.6$  Hz), 134.7, 127.4, 127.1, 116.0, 112.2, 44.2, 21.4;  $^{19}\text{F NMR}$  (377 MHz,  $\text{CDCl}_3$ ):  $\delta$  -142.6 (d,  $J_{\text{C-F}} = 24.4$  Hz), -155.5, -162.4; **IR** (KBr): 2922, 1726, 1520, 1494, 1002, 964  $\text{cm}^{-1}$ ; **HRMS** (ESI) Calcd for  $\text{C}_{25}\text{H}_{12}\text{F}_{10}\text{O}$  [ $\text{M} + \text{H}$ ] $^+$  519.0726, found 519.0721

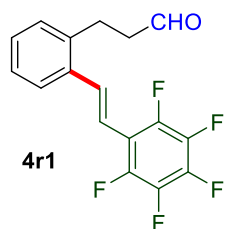

**(E)-3-(2-(2-(perfluorophenyl)vinyl)phenyl)propanal:** The crude product was purified *via* using flash chromatography; Eluent: (3% EtOAc /97% Hexane); Appearance: off white solid; isolated yield: 21%; m.p. 68-71°C;  $^1\text{H NMR}$  (400 MHz,  $\text{CDCl}_3$ ):  $\delta$  9.82 (s, 1H), 7.65 (d,  $J = 16.5$  Hz, 1H), 7.61 – 7.59 (m, 1H), 7.29 – 7.27 (m, 2H), 7.23 – 7.20 (m, 1H), 6.87 (d,  $J = 16.5$  Hz, 1H), 3.07 (dd,  $J = 8.1, 7.1$  Hz, 2H), 2.76 (td,  $J = 7.5, 1.0$  Hz, 2H);  $^{13}\text{C NMR}$  (100 MHz,  $\text{CDCl}_3$ ):  $\delta$  200.9, 146.1, 143.6, 138.7, 136.6, 135.3, 134.5 (t,  $J_{\text{C-F}} = 7.6$  Hz), 129.7, 129.1, 127.1, 126.0, 114.8, 114.8, 112.4 (t,  $J_{\text{C-F}} = 7.6$  Hz), 44.8, 25.6;  $^{19}\text{F NMR}$  (377 MHz,  $\text{CDCl}_3$ ):  $\delta$  -142.75 (d,  $J_{\text{C-F}} = 24.6$  Hz), -155.96, -162.55; **HRMS** (ESI) Calcd for  $\text{C}_{17}\text{H}_{11}\text{F}_5\text{O}$  [ $\text{M} + \text{H}$ ] $^+$  327.0730, found 327.0729

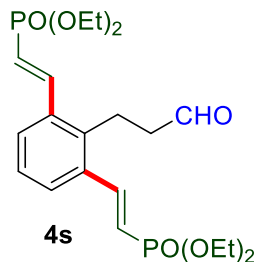

**tetraethyl ((1E,1'E)-(2-(3-oxopropyl)-1,3-phenylene)bis(ethene-2,1-diyl)bis(phosphonate):**

The crude product was purified via using flash chromatography; Eluent: (2% MeOH /98% DCM); Appearance: light yellow viscous oil; isolated yield: 48%. **<sup>1</sup>H NMR** (400 MHz, CDCl<sub>3</sub>): 9.79 (s, 1H), 7.78 (dd, *J* = 17.3 Hz, 2H), 7.54 (*d*, *J* = 8.0, 2H), 7.29 (t, *J* = 7.7 Hz, 1H), 6.21 (td, *J* = 18.0, 1.9 Hz, 2H), 4.20– 4.12 (m, 8H), 3.18 (t, *J* = 7.8 Hz, 2H), 2.67 (t, *J* = 7.8 Hz, 2H), 1.37 (t, *J* = 7.1 Hz, 12H); **<sup>13</sup>C NMR** (100 MHz, CDCl<sub>3</sub>): δ 199.8, 145.5, 145.4, 137.9, 135.2, 135.0, 128.4, 127.2, 119.3, 117.4, 62.0, 61.8, 44.4, 21.1, 16.4, 16.3; **HRMS** (ESI) Calcd for C<sub>21</sub>H<sub>32</sub>O<sub>7</sub>P<sub>2</sub> [M + H]<sup>+</sup> 459.1623, found 459.1620

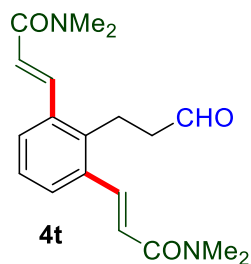

**(2E,2'E)-3,3'-(2-(3-oxopropyl)-1,3-phenylene)bis(N,N-dimethylacrylamide):** The crude product was purified *via* using flash chromatography; Eluent: (5% MeOH /95% DCM); Appearance: off white solid; isolated yield: 56%; m.p. 173-176°C; **<sup>1</sup>H NMR** (400 MHz, CDCl<sub>3</sub>): 9.77 (s, 1H), 7.93 (d, *J* = 15.2 Hz, 2H), 7.51 (d, *J* = 7.8 Hz, 2H), 7.26 (t, *J* = 7.8 Hz, 1H), 6.78 (d, *J* = 15.1 Hz, 2H), 3.33 – 3.18 (m, 8H), 3.07 (s, 6H), 2.65 (t, *J* = 7.9 Hz, 2H); **<sup>13</sup>C NMR** (100 MHz, CDCl<sub>3</sub>): δ 200.3, 166.1, 139.4, 138.1, 135.4, 127.9, 126.9, 121.1, 44.2, 37.3, 35.7, 21.5; **IR** (KBr): 2925, 1719, 1647, 1604, 1393, 1137, 978, 795 cm<sup>-1</sup>; **HRMS** (ESI) Calcd for C<sub>19</sub>H<sub>24</sub>N<sub>2</sub>O<sub>3</sub> [M + H]<sup>+</sup> 329.1787, found 329.1779

### General procedure for late-stage diversification of natural products and drug molecules:

**General procedure (F): General procedure for remote C-H olefination of natural products and drug molecules via palladium/enamine co-catalysis is as follows.** In glove box, a 37 mL Schlenk tube was equipped with a magnetic stir bar was charged with corresponding aldehyde derivative **5a-11a** (0.10 mmol), Pd(OAc)<sub>2</sub> (3.37 mg, 15 mol%), Cu(OAc)<sub>2</sub> (5.45 mg, 30 mol%). The tube was fitted with a rubber septum and moved out of the glove box. Then ethyl acrylate (45 μL, 0.40 mmol, 4 equiv.), HFIP (2 mL), AcOH (82 μL, 15 equiv.), H<sub>2</sub>O (7 μL, 4 equiv.) and dibutylamine (*n*-Bu)<sub>2</sub>NH (7 μL, 40 mol %) were added to the Schlenk tube through the rubber septum using syringes. The tube was evacuated and filled with O<sub>2</sub> with three times and then the septum was replaced with a Teflon screwcap under O<sub>2</sub> flow. The reaction mixture was stirred at room temperature for 10 min., then at 40 °C for 72 h. After cooling to ambient temperature, the reaction mixture was diluted with 10 mL of DCM and filtered through a pad of silica gel and washed with additional 10 mL of ethyl acetate. The organic layer was concentrated in *vacuo* and purified by flash column chromatography using silica gel; Eluent: (EtOAc /hexane). The ratio of di and mono (D:M) olefinated product were determined by <sup>1</sup>H NMR of the crude reaction mixture using dibromometanne as internal standard with respect to the alkene (CH=CH) proton in the product, which appear as doublet (approximately at 6.3 to 7.0 ppm, respectively).

### Experimental data of olefinated natural products and drug molecules:

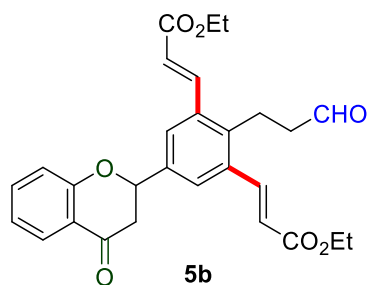

**Diethyl 3,3'-(5-(4-oxochroman-2-yl)-2-(3-oxopropyl)-1,3-phenylene)(2E,2'E)-diacrylate (5b):** Olefination was done by *general procedure (F)* with substrate **5a** (0.0280 g, 0.10 mmol) and ethyl acrylate (45 μL, 4 equiv., 0.40 mmol) as olefin partner. The crude product was purified via using flash chromatography; Eluent: (16% EtOAc /84% hexane); Appearance: light yellow solid;

isolated yield: 80%; m.p. 168-170°C;  $^1\text{H NMR}$  (400 MHz,  $\text{CDCl}_3$ ): 9.81 (s, 1H), 7.99 (d,  $J = 15.7$  Hz, 2H), 7.94 (dd,  $J = 8.1, 1.6$  Hz, 1H), 7.68 (s, 2H), 7.55 (td,  $J = 7.9, 2.0$  Hz, 1H), 7.11-7.07 (m, 2H), 6.40 (d,  $J = 15.7$  Hz, 2H), 5.50 (dd,  $J = 13.3, 2.8$  Hz, 1H), 4.28 (q,  $J = 7.2$  Hz, 4H), 3.23 (t,  $J = 8.1$  Hz, 2H), 3.08 (dd,  $J = 16.8, 13.2$  Hz, 1H), 2.91 (dd,  $J = 16.9, 2.9$  Hz, 1H), 2.69 (t,  $J = 8.1$  Hz, 2H), 1.35 (t,  $J = 7.2$  Hz, 6H);  $^{13}\text{C NMR}$  (100 MHz,  $\text{CDCl}_3$ ):  $\delta$  199.6, 191.2, 166.2, 161.1, 141.0, 139.2, 138.0, 136.3, 135.2, 127.1, 126.2, 122.5, 121.2, 120.8, 118.0, 78.8, 60.8, 44.5, 44.3, 21.2 and 14.2; **IR** (KBr): 2982, 2843, 1702, 1627, 1606, 1463, 1368, 1180, 1034, 975, 756  $\text{cm}^{-1}$  **HRMS** (ESI) Calcd for  $\text{C}_{28}\text{H}_{28}\text{O}_7$   $[\text{M} + \text{H}]^+$  477.1908, found 477.1908

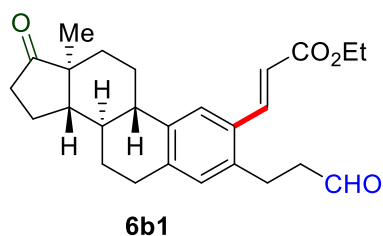

**ethyl (E)-3-((8R,9S,13S,14S)-13-methyl-17-oxo-3-(3-oxopropyl)-7,8,9,11,12,13,14,15,16,17-decahydro-6H-cyclopenta[a]phenanthren-2-yl)acrylate (6b1):** Olefination was done by *general procedure (F)* with substrate **6a** (0.0310 g, 0.10 mmol) and ethyl acrylate (45  $\mu\text{L}$ , 4 equiv., 0.40 mmol) as olefin partner. The crude product was purified *via* using flash chromatography; Eluent: (20% EtOAc /80% hexane); Appearance: viscous oil; isolated yield: 25% (31% brsm)  $^1\text{H NMR}$  (400 MHz,  $\text{CDCl}_3$ ): 9.81 (s, 1H), 7.92 (d,  $J = 15.8$  Hz, 1H), 7.51 (s, 1H), 6.96 (s, 1H), 6.34 (d,  $J = 15.8$  Hz, 1H), 4.27 (q,  $J = 7.2$  Hz, 2H), 3.05 (t,  $J = 7.4$  Hz, 2H), 2.91-2.87 (m, 2H), 2.73 (t,  $J = 7.4$  Hz, 2H), 2.55-2.48 (m, 2H), 2.31-2.25 (m, 1H), 2.18-2.0 (m, 4H), 1.61-1.46 (m, 6H), 1.36 (t,  $J = 7.1$  Hz, 3H), 0.92 (s, 3H);  $^{13}\text{C NMR}$  (100 MHz,  $\text{CDCl}_3$ ):  $\delta$  220.6, 200.9, 167.0, 141.6, 139.3, 138.6, 137.3, 130.49, 130.45, 123.8, 119.1, 60.5, 50.5, 47.9, 45.0, 44.1, 38.0, 35.8, 31.5, 29.2, 26.3, 25.7, 24.9, 21.6, 14.3, and 13.8; **HRMS** (ESI) Calcd for  $\text{C}_{26}\text{H}_{32}\text{O}_4$   $[\text{M} + \text{H}]^+$  409.2373, found 409.2373, brsm = based on recovered starting material.

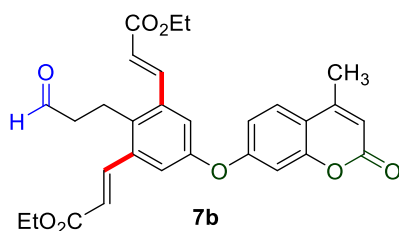

**diethyl 3,3'-(5-((4-methyl-2-oxo-2H-chromen-7-yl)oxy)-2-(3-oxopropyl)-1,3-phenylene)(2E,2'E)-diacrylate (7b):** Olefination was done by *general procedure (F)* with substrate **7a** ( 0.0308 g, 0.10 mmol) and ethyl acrylate (45  $\mu$ L, 4 equiv., 0.40 mmol) as olefin partner. The crude product was purified via using flash chromatography; Eluent: (25% EtOAc /75% hexane); Appearance: light yellow solid; isolated yield: 20% (24% brsm) m.p. 155-157°C; **<sup>1</sup>H NMR** (400 MHz, CDCl<sub>3</sub>):  $\delta$  9.83 (s, 1H), 7.95 (d,  $J$  = 15.7 Hz, 2H), 7.58 (d,  $J$  = 8.7 Hz, 1H), 7.26 (s, 2H), 6.96 (dd,  $J$  = 8.7, 2.5 Hz, 1H), 6.88 (d,  $J$  = 2.4 Hz, 1H), 6.28 (d,  $J$  = 15.7 Hz, 2H), 6.22 (d,  $J$  = 1.2 Hz, 1H), 4.26 (q,  $J$  = 7.1 Hz, 4H), 3.20 (t,  $J$  = 8.1 Hz, 2H), 2.70 (t,  $J$  = 8.1 Hz, 2H), 2.44 (d,  $J$  = 1.2 Hz, 3H), 1.33 (t,  $J$  = 7.1 Hz, 6H); **<sup>13</sup>C NMR** (100 MHz, CDCl<sub>3</sub>):  $\delta$  199.7, 166.1, 160.6, 160.1, 155.0, 154.3, 152.1, 140.5, 136.6, 135.3, 126.1, 122.8, 119.6, 115.8, 114.4, 113.3, 105.8, 60.8, 44.6, 20.9, 18.7 and 14.2; **IR** (KBr): 2974, 2922, 1718, 1615, 1441, 1417, 1398, 1311, 1272, 1164, 1018, 974, 861  $\text{cm}^{-1}$ ; **HRMS** (ESI) Calcd for C<sub>29</sub>H<sub>28</sub>O<sub>8</sub> [M + H]<sup>+</sup> 505.1857, found 505.1856; brsm = based on recovered starting material

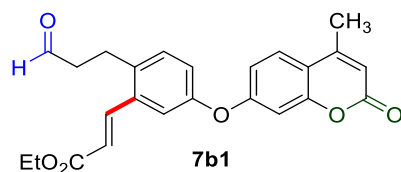

**ethyl (E)-3-(5-((4-methyl-2-oxo-2H-chromen-7-yl)oxy)-2-(3-oxopropyl)phenyl)acrylate (7b1):** The crude product was purified via using flash chromatography; Eluent: (20% EtOAc /80% hexane); Appearance: light yellow solid; isolated yield: 40% (47% brsm); m.p. 143-145°C; **<sup>1</sup>H NMR** (400 MHz, CDCl<sub>3</sub>):  $\delta$  9.84 (s, 1H), 7.91 (d,  $J$  = 15.8 Hz, 1H), 7.56 (d,  $J$  = 8.8 Hz, 1H), 7.34-7.23 (m, 2H), 7.04 (dd,  $J$  = 8.3, 2.5 Hz, 1H), 6.94 (dd,  $J$  = 8.7, 2.4 Hz, 1H), 6.84 (d,  $J$  = 2.4 Hz, 1H), 6.31 (d,  $J$  = 15.8 Hz, 1H), 6.20 (s, 1H), 4.26 (q,  $J$  = 7.1 Hz, 2H), 3.11 (t,  $J$  = 7.5 Hz, 2H), 2.79 (t,  $J$  = 7.5 Hz, 2H), 2.43 (s, 3H), 1.33 (t,  $J$  = 7.1 Hz, 3H); **<sup>13</sup>C NMR** (100 MHz, CDCl<sub>3</sub>):  $\delta$  200.5, 166.4, 160.7, 160.6, 154.9, 154.2, 152.1, 140.3, 136.4, 135.0, 131.8, 125.9, 121.8, 121.4, 118.1, 115.4, 114.3, 113.1, 105.5, 60.7, 45.0, 24.8, 18.7 and 14.2 ; **HRMS** (ESI) Calcd for C<sub>24</sub>H<sub>22</sub>O<sub>6</sub> [M + H]<sup>+</sup> 407.1489, found 407.1488; brsm = based on recovered starting material

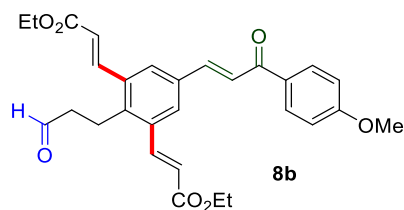

**diethyl 3,3'-(5-((E)-3-(4-methoxyphenyl)-3-oxoprop-1-en-1-yl)-2-(3-oxopropyl)-1,3-phenylene)(2E,2'E)-diacrylate (8b):** The crude product was purified via using flash chromatography; Eluent: (18% EtOAc /82% hexane); Appearance: light yellow solid; isolated yield: 39%; m.p. 137-140°C;  $^1\text{H NMR}$  (400 MHz,  $\text{CDCl}_3$ ):  $\delta$  9.81 (s, 1H), 8.07 (d,  $J = 8.9$  Hz, 2H), 7.99 (d,  $J = 15.7$  Hz, 2H), 7.76 (d,  $J = 15.3$  Hz, 3H)\*, 7.58 (d,  $J = 15.7$  Hz, 1H), 7.01 (d,  $J = 8.9$  Hz, 2H), 6.43 (d,  $J = 15.7$  Hz, 2H), 4.30 (q,  $J = 7.1$  Hz, 4H), 3.91 (s, 3H), 3.21 (dd,  $J = 8.8, 7.0$  Hz, 2H), 2.68 (d,  $J = 7.0$  Hz, 2H), 1.36 (t,  $J = 7.1$  Hz, 6H);  $^{13}\text{C NMR}$  (100 MHz,  $\text{CDCl}_3$ ):  $\delta$  199.6, 188.1, 166.2, 163.6, 142.1, 140.9, 140.6, 135.4, 134.2, 130.9, 130.8, 128.1, 122.8, 122.7, 113.9, 60.9, 55.5, 44.2, 21.5, 14.3; **HRMS** (ESI) Calcd for  $\text{C}_{29}\text{H}_{30}\text{O}_7$   $[\text{M} + \text{H}]^+$  491.1991, found 491.1990; \*mean aromatic and alkene peak merged at  $\delta$  7.76

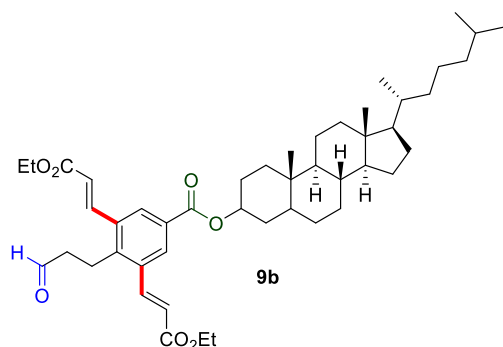

**(8R,9S,10S,13R,14S,17R)-10,13-dimethyl-17-((R)-6-methylheptan-2-yl)hexadecahydro-1H-cyclopenta[a]phenanthren-3-yl 3-((E)-3-ethoxy-3-oxoprop-1-en-1-yl)-5-((E)-4-ethoxy-4-oxobut-2-en-1-yl)-4-(3-oxopropyl)benzoate (9b):** Olefination was done by *general procedure (F)* with substrate **9a** (0.0548 g, 0.10 mmol) and ethyl acrylate (45  $\mu\text{L}$ , 4 equiv., 0.40 mmol) as olefin partner. The crude product was purified via using flash chromatography; Eluent: (22% EtOAc /78% hexane); Appearance: white solid; isolated yield: 11% (15% brsm); m.p. 123-125°C;  $^1\text{H NMR}$  (400 MHz,  $\text{CDCl}_3$ ):  $\delta$  9.78 (s, 1H), 8.16 (s, 2H), 7.94 (d,  $J = 15.7$  Hz, 2H), 6.44 (d,  $J = 15.7$  Hz, 2H), 4.99-4.91 (m, 1H), 4.27 (q,  $J = 7.1$  Hz, 4H), 3.21 (t,  $J = 7.5$  Hz, 2H), 2.65 (t,  $J = 7.5$  Hz, 2H), 1.98-1.90 (m, 2H), 1.82-1.79 (m, 2H), 1.71-1.67 (m, 3H),



1.57-1.47 (m, 4H), 1.35-1.28 (m, 15H), 1.15-0.98 (m, 9H), 0.90 – 0.83 (m, 14H), 0.64 (s, 3H);  $^{13}\text{C}$  NMR (100 MHz,  $\text{CDCl}_3$ ):  $\delta$  199.5, 166.3, 165.0, 143.1, 140.7, 134.8, 130.0, 129.3, 122.9, 60.9, 56.4, 56.2, 54.2, 44.7, 44.1, 42.6, 39.9, 39.5, 36.7, 36.1, 35.8, 35.5, 35.4, 34.1, 32.0, 31.4, 30.2, 30.1, 29.7, 29.3, 28.6, 28.2, 27.9, 27.5, 27.2, 24.2, 23.8, 22.8, 22.5, 21.5, 21.2, 18.6, 14.3, 12.3, 12.0; HRMS (ESI) Calcd for  $\text{C}_{47}\text{H}_{68}\text{O}_7$   $[\text{M} + \text{H}]^+$  745.5043, found 745.5033; brsm = based on recovered starting material.

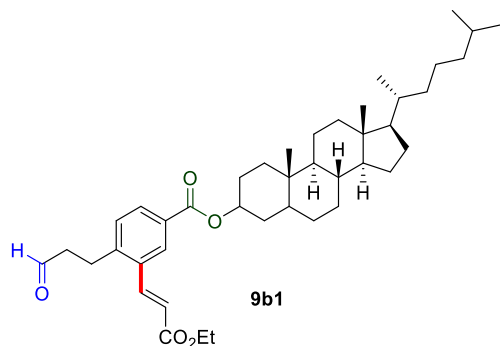

**(8R,9S,10S,13R,14S,17R)-10,13-dimethyl-17-((R)-6-methylheptan-2-yl)hexadecahydro-1H-cyclopenta[a]phenanthren-3-yl 3-((E)-3-ethoxy-3-oxoprop-1-en-1-yl)-4-(3-oxopropyl)benzoate (9b1):** The crude product was purified via using flash chromatography; Eluent: (14% EtOAc /86% hexane); Appearance: viscous oil; isolated yield: 24% (32% brsm).  $^1\text{H}$  NMR (400 MHz,  $\text{CDCl}_3$ ): 9.81 (s, 1H), 8.20 (d,  $J = 1.3$  Hz, 1H), 7.97-7.91 (m, 2H), 7.30 (d,  $J = 8.1$  Hz, 1H), 6.49 (d,  $J = 15.8$  Hz, 1H), 4.98-4.91 (m, 1H), 4.29 (q,  $J = 7.1$ Hz, 2H), 3.13 (t,  $J = 7.5$  Hz, 2H), 2.77 (t,  $J = 7.5$  Hz, 2H), 1.99-1.92 (m, 2H), 1.84-1.77 (m, 2H), 1.73-1.64 (m, 3H), 1.57-1.48 (m, 4H), 1.38-1.25 (m, 12H), 1.16-1.06 (m, 6H), 1.04-0.99 (m, 3H), 0.91-0.85 (m, 14H), 0.66 (s, 3H);  $^{13}\text{C}$  NMR (100 MHz,  $\text{CDCl}_3$ ):  $\delta$  200.1, 166.5, 165.4, 144.4, 140.4, 133.2, 130.9, 129.9, 129.8, 128.0, 121.5, 74.6, 60.7, 56.4, 56.2, 54.2, 44.7, 44.5, 42.5, 39.9, 39.5, 36.7, 36.1, 35.8, 35.5, 35.4, 34.1, 31.9, 28.6, 28.2, 27.9, 27.5, 25.4, 24.2, 23.8, 22.8, 22.5, 21.2, 18.6, 14.3, 12.3, 12.0; IR (KBr): 2934, 2866, 1716, 1636, 1258, 1178, 1119, 1003, 760  $\text{cm}^{-1}$ ; HRMS (ESI) Calcd for  $\text{C}_{42}\text{H}_{62}\text{O}_5\text{N}$   $[\text{M} + \text{NH}_4]^+$  664.4936, found 664.4933

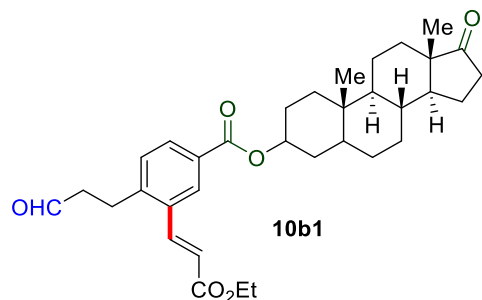

**(8R,9S,10S,13S,14S)-10,13-dimethyl-17-oxohexadecahydro-1H-cyclopenta[a]phenanthren-3-yl 3-((E)-3-ethoxy-3-oxoprop-1-en-1-yl)-4-(3-oxopropyl)benzoate (10b1):** Olefination was done by *general procedure (F)* with substrate **10a** (0.0450 g, 0.10 mmol) and ethyl acrylate (45  $\mu$ L, 4 equiv., 0.40 mmol) as olefin partner. The crude product was purified *via* using flash chromatography; Eluent: (18% EtOAc /82% hexane); Appearance: viscous oil; isolated yield: 33% (47% brsm);  $^1\text{H NMR}$  (400 MHz,  $\text{CDCl}_3$ ):  $\delta$  9.80 (s, 1H), 8.22 (s, 1H), 7.96-7.91 (m, 2H), 7.33-7.26 (m, 1H), 6.46 (d,  $J = 15.8$  Hz, 1H), 5.27 (s, 1H), 4.27 (q,  $J = 7.0$  Hz, 2H), 3.13 (t,  $J = 7.5$  Hz, 2H), 2.77 (t,  $J = 7.5$  Hz, 2H), 2.43 (dd,  $J = 19.2, 8.6$  Hz, 1H), 2.10 -2.01 (m, 1H), 1.97-1.67 (m, 6H), 1.66-1.47 (m, 6H), 1.35-1.23 (m, 10H), 1.08-0.99 (m, 1H), 0.87 (s, 6H);  $^{13}\text{C NMR}$  (100 MHz,  $\text{CDCl}_3$ ):  $\delta$  221.2, 200.1, 166.5, 165.2, 144.5, 140.5, 133.4, 130.6, 130.04, 130.02, 128.2, 121.6, 70.9, 60.7, 54.5, 51.4, 47.8, 44.4, 40.5, 36.0, 35.8, 35.0, 33.2, 32.9, 31.5, 30.7, 28.0, 26.2, 25.4, 21.7, 20.1, 14.3, 13.8 and 11.4; **HRMS** (ESI) Calcd for  $\text{C}_{34}\text{H}_{44}\text{O}_6$   $[\text{M} + \text{H}]^+$  549.3211, found 549.3210; brsm = based on recovered starting material.

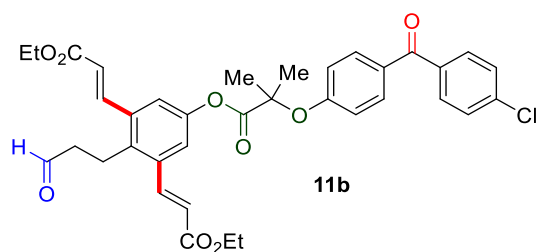

**diethyl 3,3'-(5-((2-(4-(4-chlorobenzoyl)phenoxy)-2-methylpropanoyl)oxy)-2-(3-oxopropyl)-1,3-phenylene)(2E,2'E)-diacrylate (11b):** Olefination was done by *general procedure (F)* with substrate **11a** (0.045 g, 0.10 mmol) and ethyl acrylate (45  $\mu$ L, 4 equiv., 0.40 mmol) as olefin partner. The crude product was purified *via* using flash chromatography; Eluent: (20% EtOAc /80% hexane); Appearance: light yellow viscous oil; isolated yield: 25% (29% brsm); m.p. 133-135 $^\circ\text{C}$ ;  $^1\text{H NMR}$  (400 MHz,  $\text{CDCl}_3$ ):  $\delta$  9.77 (s, 1H), 7.90 (d,  $J = 15.7$  Hz, 2H), 7.79 (d,  $J = 8.8$

Hz, 2H), 7.70 (d,  $J = 8.4$  Hz, 2H), 7.43 (d,  $J = 8.4$  Hz, 2H), 7.16 (s, 2H), 6.98 (d,  $J = 8.8$  Hz, 2H), 6.25 (d,  $J = 15.7$  Hz, 2H), 4.24 (q,  $J = 7.1$  Hz, 4H), 3.14 (t,  $J = 6.5$  Hz, 2H), 2.62 (t,  $J = 6.5$  Hz, 2H), 1.82 (s, 6H), 1.30 (t,  $J = 7.1$  Hz, 6H);  $^{13}\text{C NMR}$  (100 MHz,  $\text{CDCl}_3$ ):  $\delta$  199.6, 194.0, 172.2, 166.0, 159.4, 149.1, 140.4, 138.5, 136.8, 136.2, 136.1, 132.1, 131.2, 130.9, 128.6, 122.9, 121.0, 117.5, 79.5, 60.9, 44.4, 25.5, 21.0 and 14.2; **HRMS** (ESI) Calcd for  $\text{C}_{36}\text{H}_{35}\text{ClO}_9$   $[\text{M} + \text{H}]^+$  647.2042, found 647.2036; brsm = based on recovered starting material.

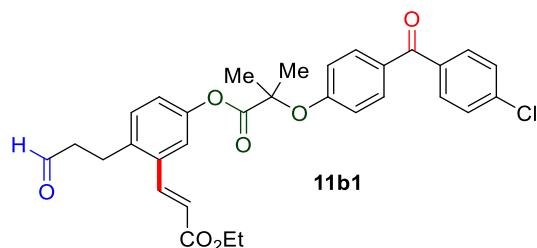

### ethyl(E)-3-(5-((2-(4-(4-chlorobenzoyl)phenoxy)-2-methylpropanoyl)oxy)-2-(3-oxopropyl)phenyl)acrylate (11b1):

The crude product was purified *via* using flash chromatography; Eluent: (12% EtOAc /88% hexane); Appearance: light yellow liquid; isolated yield: 35% (41% brsm); m.p. 118-120°C;  $^1\text{H NMR}$  (400 MHz,  $\text{CDCl}_3$ ):  $\delta$  9.79 (s, 1H), 7.88 (d,  $J = 15.8$  Hz, 1H), 7.80 (d,  $J = 8.8$  Hz, 2H), 7.72 (d,  $J = 8.4$  Hz, 2H), 7.45 (d,  $J = 8.4$  Hz, 2H), 7.23 (d,  $J = 8.4$  Hz, 1H), 7.18 (d,  $J = 2.4$  Hz, 1H), 6.99 (d,  $J = 8.8$  Hz, 2H), 6.94 (dd,  $J = 8.4, 2.4$  Hz, 1H), 6.30 (d,  $J = 15.7$  Hz, 1H), 4.26 (q,  $J = 7.1$  Hz, 2H), 3.07 (t,  $J = 7.5$  Hz, 2H), 2.73 (t,  $J = 7.5$  Hz, 2H), 1.83 (s, 6H), 1.32 (t,  $J = 7.1$  Hz, 3H);  $^{13}\text{C NMR}$  (100 MHz,  $\text{CDCl}_3$ ):  $\delta$  200.6, 194.1, 172.3, 166.3, 159.4, 149.1, 140.2, 138.4, 137.8, 136.2, 134.5, 132.1, 131.1, 131.1, 130.7, 128.5, 122.7, 121.5, 119.2, 117.3, 79.4, 60.7, 44.8, 25.4, 24.8 and 14.2; **HRMS** (ESI) Calcd for  $\text{C}_{31}\text{H}_{29}\text{ClO}_7$   $[\text{M} + \text{H}]^+$  549.1675, found 549.1669; brsm = based on recovered starting material.

### Synthetic procedures and experimental data for post-synthetic modification of compound (3a):

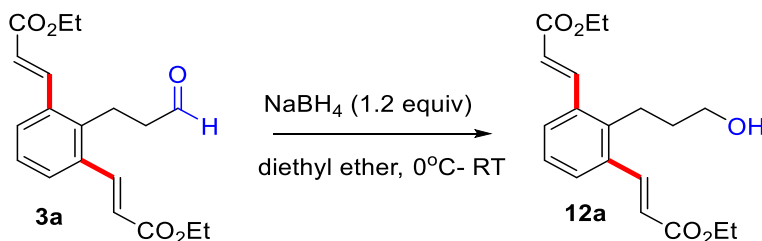

### Synthesis of diethyl 3,3'-(2-(3-hydroxypropyl)-1,3-phenylene)(2E,2'E)-diacrylate **12a**

(Figure 5, method a): To a stirred ice cold solution of diethyl 3,3'-(2-(3-oxopropyl)-1,3-phenylene)(2E,2'E)-diacrylate **3a** (66 mg, 0.2 mmol) in diethyl ether (10 mL) was added NaBH<sub>4</sub> (9 mg, 1.2 equiv.) in portion wise, After being stirred at 0 °C for 10 min, the reaction was further stirred at room temperature for 4 h. After the completion of reaction (monitor by TLC), reaction mixture was quenched with saturated aqueous NH<sub>4</sub>Cl (10 mL). The aqueous and organic layer were separated by extraction of aqueous layer with DCM (2 x 10 mL). The combined organic extracts were dried over anhydrous Na<sub>2</sub>SO<sub>4</sub> and concentrate under reduced pressure. The resulting crude product was purified via using flash chromatography; (Eluent: 30% EtOAc / 70% hexane); Appearance: colorless viscous oil; isolated yield: 89%; m.p. 56-57°C; <sup>1</sup>H NMR (400 MHz, CDCl<sub>3</sub>): 8.09 (d, *J* = 15.7 Hz, 2H), 7.57 (d, *J* = 7.8 Hz, 2H), 7.26 (t, *J* = 7.7 Hz, 1H), 6.35 (d, *J* = 15.7 Hz, 2H), 4.27 (q, *J* = 7.2 Hz, 4H), 3.70 (t, *J* = 6.2 Hz, 2H), 3.00 (t, *J* = 7.8 Hz, 2H), 2.43 (s, 1H), 1.82-1.75 (m, 2H), 1.34 (t, *J* = 7.2 Hz, 6H); <sup>13</sup>C NMR (100 MHz, CDCl<sub>3</sub>): δ 166.8, 142.2, 140.8, 134.3, 128.4, 126.6, 120.9, 61.6, 60.6, 34.0, 25.1, 14.2; IR (KBr): 3528, 3222, 2987, 2939, 2885, 1716, 1698, 1626, 1177, 984, 863 cm<sup>-1</sup>; HRMS (ESI) Calcd for C<sub>19</sub>H<sub>24</sub>O<sub>5</sub> [M + H]<sup>+</sup> 333.1697, found 333.1691

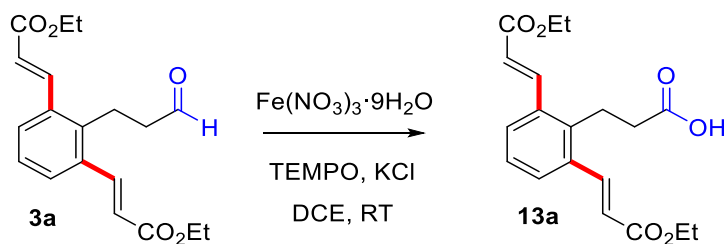

### Synthesis of 3-(2,6-bis((E)-3-ethoxy-3-oxoprop-1-en-1-yl)phenyl)propanoic acid **13a** (Figure 5, method b)<sup>18</sup>:

A 38 mL Schlenk tube was charged with diethyl 3,3'-(2-(3-oxopropyl)-1,3-phenylene)(2E,2'E)-diacrylate **3a** (66 mg, 0.2 mmol), Fe(NO<sub>3</sub>)<sub>3</sub>·9H<sub>2</sub>O (8 mg, 10 mol% ), TEMPO (6 mg, 20 mol%), KCl (4 mg, 20 mmol), and DCE (2 mL). The tube was evacuated and filled with O<sub>2</sub> with three times. The reaction mixture was stirred vigorously at room temperature for 24 h. After the completion of reaction, crude reaction mixture was filtered through a short pad of silica and eluted with additional 20 mL of EtOAc: MeOH (1:1) solvent. The filtrate was then concentrated in vacuo. The residual was purified via flash chromatography; Eluent: (40% EtOAc /60% hexane); Appearance: off white solid; isolated yield: 92%; m.p. 118-120 °C; <sup>1</sup>H NMR (400

MHz, CDCl<sub>3</sub>): 9.98 (s, 1H), 8.08 (d, *J* = 15.7 Hz, 2H), 7.57 (d, *J* = 7.8 Hz, 2H), 7.29 (t, *J* = 7.7 Hz, 1H), 6.36 (d, *J* = 15.7 Hz, 2H), 4.28(q, *J* = 7.2 Hz, 4H), 3.24 (t, *J* = 7.8 Hz, 2H), 2.54 (t, *J* = 7.8 Hz, 2H), 1.35 (t, *J* = 7.2 Hz, 6H); <sup>13</sup>C NMR (100 MHz, CDCl<sub>3</sub>): δ 177.2, 166.7, 141.8, 138.9, 134.5, 128.6, 127.2, 121.6, 60.7, 35.0, 24.0, 14.2; IR (KBr): 3239, 2984, 1740, 1708, 1685, 1627, 1327, 1149, 971, 806 cm<sup>-1</sup>; HRMS (ESI) Calcd for C<sub>19</sub>H<sub>22</sub>O<sub>6</sub> [M + H]<sup>+</sup> 347.1489, found 347.1483

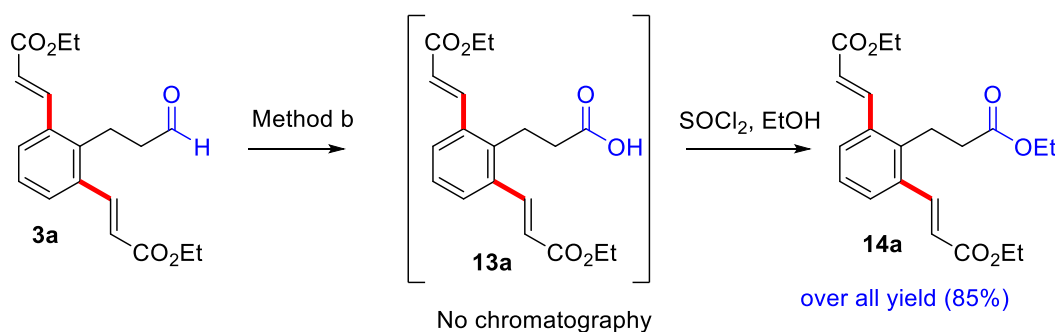

**Synthesis of diethyl 3,3'-(2-(3-ethoxy-3-oxopropyl)-1,3-phenylene)(2E,2'E)-diacrylate 14a (Figure 5, method c)** The crude diethyl 3-(2,6-bis((E)-3-ethoxy-3-oxoprop-1-en-1-yl)phenyl)propanoic acid (**13a**) obtained from corresponding aldehyde **3a** (66 mg, 0.2 mmol) using method (b) was dissolved in 5 mL of EtOH and cooled down to 0 °C, then thionyl chloride (60 μL, 5 equiv.) dissolved in 5 mL DCM was added dropwise. The reaction mixture was stirred at room temperature for 3 h. After the completion of reaction, reaction mixture was concentrated in vacuo and residual was purified via flash chromatography; Eluent: (25% EtOAc /75% hexane); Appearance: white solid; overall isolated yield: 85%; m.p. 82-84°C; <sup>1</sup>H NMR (400 MHz, CDCl<sub>3</sub>): 8.03 (d, *J* = 15.7 Hz, 2H), 7.56 (d, *J* = 7.8 Hz, 2H), 7.28 (t, *J* = 7.7 Hz, 1H), 6.35 (d, *J* = 15.7 Hz, 2H), 4.28(q, *J* = 7.2 Hz, 4H), 4.15 (q, *J* = 7.2 Hz, 2H), 3.22 (t, *J* = 8.4 Hz, 2H), 2.48 (t, *J* = 8.4 Hz, 2H), 1.35 (t, *J* = 7.2 Hz, 6H), 1.26 (t, *J* = 7.2 Hz, 3H); <sup>13</sup>C NMR (100 MHz, CDCl<sub>3</sub>): δ 177.8, 166.5, 141.7, 138.9, 134.6, 128.6, 127.2, 121.7, 60.7, 60.6, 35.1, 24.1, 14.3, 14.1; IR (KBr): 2984, 1725, 1708, 1622, 1316, 1187, 1160, 1042, 973, 860 cm<sup>-1</sup>; HRMS (ESI) Calcd for C<sub>21</sub>H<sub>26</sub>O<sub>6</sub> [M + H]<sup>+</sup> 375.1802, found 375.1797

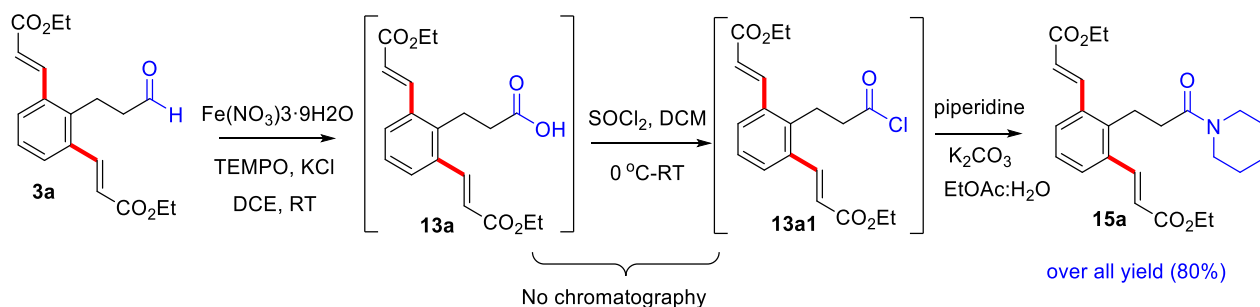

**Synthesis of diethyl 3,3'-(2-(3-oxo-3-(piperidin-1-yl)propyl)-1,3-phenylene)(2E,2'E)-diacrylate 15a (Figure 5, method d):** The crude diethyl 3-(2,6-bis((E)-3-ethoxy-3-oxoprop-1-en-1-yl)phenyl)propanoic acid (**13a**) obtained from corresponding aldehyde **3a** (66 mg, 0.2 mmol) using method (b) was dissolved in 5 mL of DCM and cooled down to 0 °C, then thionyl chloride (60  $\mu$ L, 5 equiv.) dissolved in 5 mL DCM was added dropwise. The reaction mixture was stirred at room temperature for 3 h. After the completion of reaction, reaction mixture was concentrated in vacuo and crude compound diethyl 3,3'-(2-(3-chloro-3-oxopropyl)-1,3-phenylene)(2E,2'E)-diacrylate (**13a1**) was used as such for next step. This crude compound (**13a1**) was dissolved in 5 mL of EtOAc and added dropwise to stirred biphasic ice-cold solution of piperidine (95  $\mu$ L, 5 equiv) dissolved 5 mL EtOAc and potassium carbonate (28 mg, 5 equiv) dissolved in 5 mL of water. The reaction mixture was stirred for 4 h at room temperature. After the completion of reaction, the aqueous and organic layers were separated by extraction of aqueous layer with EtOAc (2 x 10 mL). The combined organic extracts were dried over anhydrous  $\text{Na}_2\text{SO}_4$  and concentrate under reduced pressure. The resulting crude product was purified via using flash chromatography; Eluent: (45% EtOAc /65% hexane); Appearance: white solid; overall isolated yield: 80%; m.p. 87-89°C;  $^1\text{H NMR}$  (400 MHz,  $\text{CDCl}_3$ ): 8.03 (d,  $J = 15.7$  Hz, 2H), 7.56 (d,  $J = 7.8$  Hz, 2H), 7.27 (t,  $J = 7.7$  Hz, 1H), 6.34 (d,  $J = 15.7$  Hz, 2H), 4.28 (q,  $J = 7.2$  Hz, 4H), 3.53 (br, 2H), 3.31 (br, 2H), 3.22 (t,  $J = 8.4$  Hz, 2H), 2.46 (t,  $J = 8.4$  Hz, 2H), 1.62 (br, 2H), 1.51 (br, 4H), 1.34 (t,  $J = 7.2$  Hz, 6H);  $^{13}\text{C NMR}$  (100 MHz,  $\text{CDCl}_3$ ):  $\delta$  169.3, 166.4, 141.7, 139.7, 134.6, 128.6, 127.0, 121.6, 60.6, 46.5, 42.7, 34.0, 26.3, 25.4, 24.8, 24.4, 14.3; **IR** (KBr): 2981, 2935, 2856, 1706, 1642, 1620, 1316, 1163, 1041, 985, 793  $\text{cm}^{-1}$ ; **HRMS** (ESI) Calcd for  $\text{C}_{24}\text{H}_{31}\text{NO}_5$   $[\text{M} + \text{H}]^+$  414.2275, found 414.2270

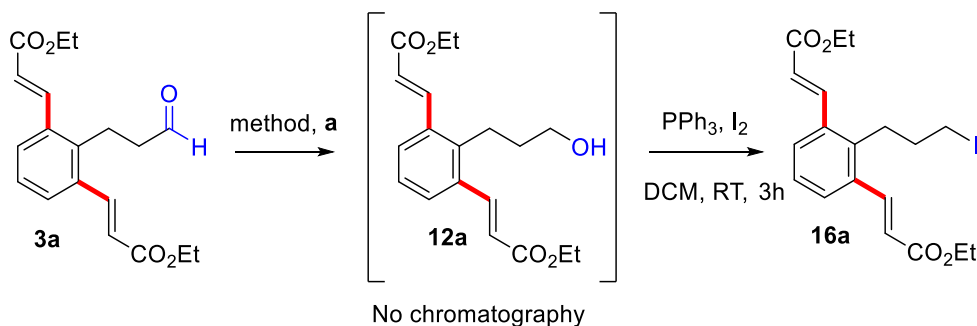

**diethyl 3,3'-(2-(3-iodopropyl)-1,3-phenylene)(2E,2'E)-diacrylate 17a (Figure 5 method e)<sup>19</sup>**

A 50 mL round bottom flask equipped with magnetic stirring bar was charged with triphenylphosphine (76 mg, 1.5 equiv.), I<sub>2</sub> (76 mg, 1.5 equiv.) and 5 mL of DCM was allowed to stir at room temperature for 10 min, thereafter imidazole (34 mg, 2.5 equiv.) was added and again stir the reaction mixture for another 15 min. Finally crude diethyl 3,3'-(2-(3-hydroxypropyl)-1,3-phenylene)(2E,2'E)-diacrylate (**12a**) obtained from corresponding aldehyde **3a** (66 mg, 0.2 mmol) using method (a) was dissolved in 5 mL of DCM and added slowly to the reaction mixture. After the completion of reaction (3 h), reaction mixture was quenched with saturated sodium metabisulfite (10 mL). This mixture was extracted with ethyl acetate (2 x 5 mL) and combine organic layer was dried over anhydrous Na<sub>2</sub>SO<sub>4</sub>. The organic layer was concentrated and purified via using flash chromatography; Eluent: (5% EtOAc /95% hexane); Appearance: viscous oil; overall isolated yield: 64%; <sup>1</sup>H NMR (400 MHz, CDCl<sub>3</sub>): 8.07 (d, *J* = 15.7 Hz, 2H), 7.59 (d, *J* = 7.8 Hz, 2H), 7.30 (t, *J* = 7.7 Hz, 1H), 6.37 (d, *J* = 15.7 Hz, 2H), 4.30 (q, *J* = 7.2 Hz, 4H), 3.28 (t, *J* = 6.7 Hz, 2H), 3.02 (t, *J* = 8.1 Hz, 2H), 2.06-1.99 (m, 2H), 1.37 (t, *J* = 7.2 Hz, 6H); <sup>13</sup>C NMR (100 MHz, CDCl<sub>3</sub>): δ 166.6, 141.7, 139.2, 134.6, 128.5, 127.1, 121.5, 60.7, 34.5, 29.9, 14.4, 5.5; IR (KBr): 2979, 1713, 1631, 1366, 1269, 1165, 1036, 981, 803 cm<sup>-1</sup>; HRMS (ESI) Calcd for C<sub>19</sub>H<sub>23</sub>IO<sub>4</sub> [M + H]<sup>+</sup> 443.0714, found 443.0713

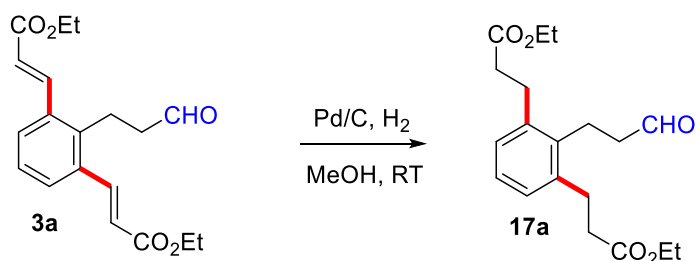

**diethyl 3,3'-(2-(3-oxopropyl)-1,3-phenylene)dipropionate 17a** (Figure 5, method f): A 50 mL round bottom flask containing stirring bar charged with diethyl 3,3'-(2-(3-oxopropyl)-1,3-phenylene)(2E,2'E)-diacrylate **3a** (66 mg, 0.2 mmol), Pd/C (10 mol%) and MeOH (5 mL). The flask was sealed with septum, and then evacuated and backfilled with hydrogen for three times. The reaction mixture was stirred at room temperature for 12 h. After the completion of reaction, crude reaction mixture was filtered through a short pad of silica and eluted with additional 20 mL of ethyl acetate. The filtrate was then concentrated in vacuo. The residual was purified via using flash chromatography; Eluent: (4% EtOAc /96% hexane); Appearance: viscous oil; isolated yield: 51%. **<sup>1</sup>H NMR** (400 MHz, CDCl<sub>3</sub>): 9.87 (s, 1H), 7.14-7.04 (m, 3H), 4.16 (q, *J* = 7.2 Hz, 4H), 3.00 (t, *J* = 7.5 Hz, 2H), 2.93 (t, *J* = 7.6 Hz, 4H), 2.70 (t, *J* = 7.5 Hz, 2H), 2.59 (t, *J* = 7.6 Hz, 4H), 1.24 (t, *J* = 7.2 Hz, 6H); **<sup>13</sup>C NMR** (100 MHz, CDCl<sub>3</sub>): δ 200.9, 172.7, 138.8, 136.3, 127.3, 126.7, 60.5, 44.6, 35.5, 27.8, 20.6, 14.1; **HRMS** (ESI) Calcd for C<sub>19</sub>H<sub>26</sub>O<sub>5</sub> [M + H]<sup>+</sup> 335.1853, found 335.1847

#### **Synthetic procedure for scale up reaction for synthesis of (3a):**

In glove box, a 150 mL Schlenk tube was equipped with a magnetic stir bar was charged with 3-phenylpropanal **1a** (0.335 mL, 2.5 mmol), Pd(OAc)<sub>2</sub> (58 mg, 10 mol%), Cu(OAc)<sub>2</sub> (136 mg, 20 mol%). The tube was fitted with a rubber septum and moved out of the glove box. Then ethyl acrylate (0.8 mL, 0.45 mmol, 3 equiv), HFIP (33 mL), AcOH (1.32 mL, 10 equiv), H<sub>2</sub>O (91 μL, 2 equiv) and dibutylamine (*n*-Bu)<sub>2</sub>NH (85 μL, 20 mol %) were added to the Schlenk tube through the rubber septum using syringes. The tube was evacuated and filled with O<sub>2</sub> with three times and then the septum was replaced with a Teflon screwcap under O<sub>2</sub> flow. The reaction mixture was stirred at room temperature for 10 min, then at 45 °C for 58 h. After cooling to ambient temperature, the reaction mixture was filtered through a pad of silica gel and washed with additional 30 mL of ethyl acetate. The organic layer was concentrated in *vacuo* and purified by flash column chromatography using silica gel; Eluent: (15% EtOAc /85% hexane); Appearance: off white solid; isolated yield: 62%, Di:Mono (6:1)



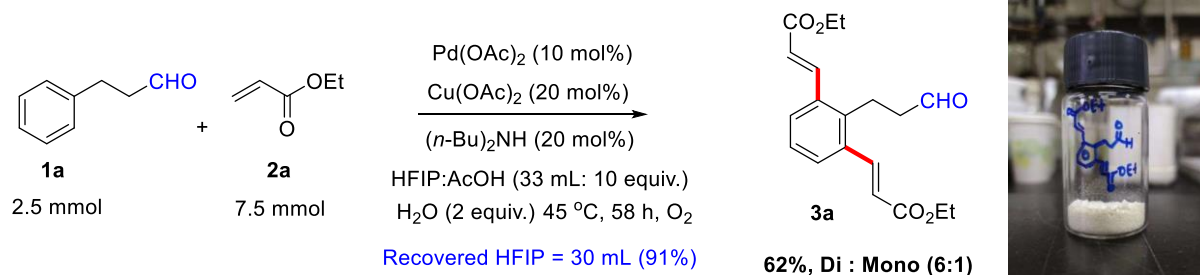

**Note:** Near about 30 mL (91%) HFIP solvent (out of 33 mL) was recovered after rotary evaporator vacuo.

### Reaction with recovered HFIP for synthesis of 3a:

To further demonstrate the practical utility of protocol, a reaction was performed under the developed reaction condition with recovered HFIP solvent. To our delight, an isolated yield of **3a** 70% was obtained with Di: Mono (10:1) selectivity.

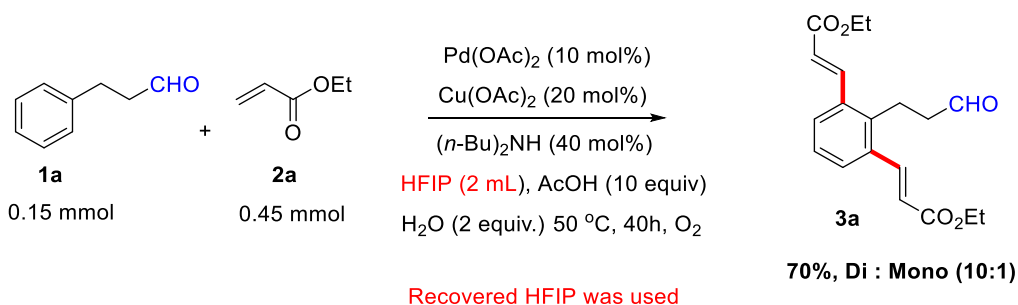

### Synthetic procedure for Synthesis of [<sup>2</sup>H<sub>5</sub>]Hydrocinnamaldehyde (**1a-D<sub>5</sub>**)<sup>20</sup>

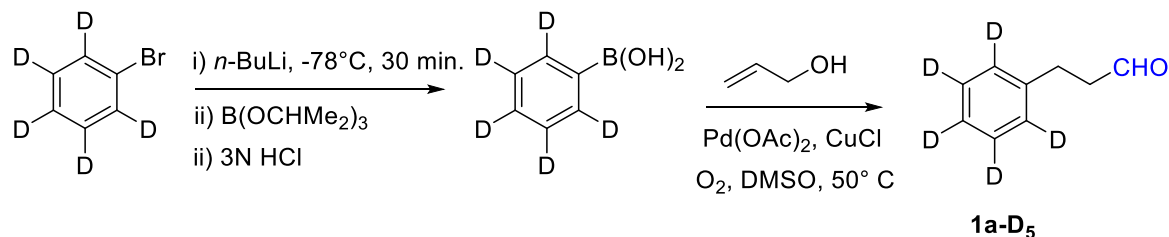

Under nitrogen atmosphere, a 250 mL of round bottom flask equipped with stirring bar was charged with bromobenzene-D<sub>5</sub> (2.9 mL 20 mmol), dry THF (40 mL) and cooled down to -78 °C. Thereafter, *n*-butyl lithium (12.5 mL, 2M, 25 mmol) was added dropwise and stirred the

reaction mixture for 30 min. at  $-78^{\circ}\text{C}$  and then tri-isopropyl borate (6.3 mL, 30 mmol) was added dropwise. The solution was allowed to warm at room temperature and stirred for 2 h. After that the reaction was quenched with dilute HCl (20%, 50 mL) and stirred the reaction mixture for another 3h at room temperature. The solution was extracted with diethyl ether (2 x 50 mL). The organic layer was washed twice with water followed by brine and concentrated over rotary evaporation. To the reaction mixture hexane was added and white solid D<sub>5</sub>-phenylboronic acid (2.0 g) compound was obtained in 75% yield which was used for further step without purification. In next step D<sub>5</sub>-phenylboronic acid (0.635 g, 5 mmol), Pd(OAc)<sub>2</sub> ( 56 mg, 5 mol%), CuCl (50 mg, 10 mol%) and allyl alcohol (0.6 mL, 8 mmol) were charged in dry 150 mL dry Schlenk tube containing 16 mL of dry solvent (DMSO/HOAc=1/1, v/v). The reaction mixture was stirred at  $50^{\circ}\text{C}$  for 30 h. After the reaction was completed, the reaction mixture was diluted with 20 mL of saturated NaCl solution. The mixture was extracted with Et<sub>2</sub>O (150 mL), washed with saturated NaHCO<sub>3</sub> (3 x 20 mL), saturated NaCl (3 x 20 mL) and dried over sodium sulfate. The solvent was removed, and the residue was purified by flash chromatography on silica gel: (Eluent: 1% EtOAc /99% hexane), provide the corresponding [<sup>2</sup>H<sub>5</sub>] Hydrocinnamaldehyde in 65 % yields as light-yellow viscous oil. <sup>1</sup>H NMR (400 MHz, CDCl<sub>3</sub>):  $\delta$  9.81 (s, 1H), 2.98 (t,  $J = 7.6$  Hz, 2H), 2.80 (t,  $J = 7.6$  Hz, 2H); <sup>13</sup>C NMR (100 MHz, CDCl<sub>3</sub>):  $\delta$  201.5, 140.1, 128.3, 128.0, 127.8, 127.6, 45.2, and 27.9 The observed <sup>1</sup>H and <sup>13</sup>C NMR values were in consistent with previously reported literature<sup>20</sup>

### Synthesis of deuterated di-butyl amine:

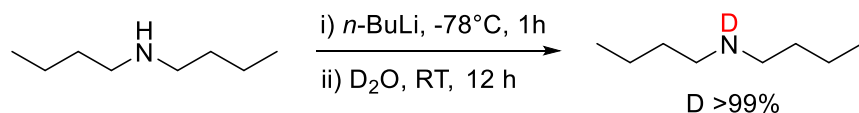

An oven-dried 100 mL round bottom flask was charged with di-butyl amine (3.23 mL, 20 mmol) and dry THF (30 mL) was cooled down at  $-78^{\circ}\text{C}$  and then *n*-butyl lithium (12.0 mL, 2.5M, 30 mmol) was added dropwise. The reaction mixture was stirred at  $-78^{\circ}\text{C}$  for 1h and then quenched with D<sub>2</sub>O (2 mL). Thereafter, reaction mixture was stirred at room temperature for 2 h. After completion of reaction, reaction mixture was extracted with EtOAc (100 mL), washed with saturated brine, dried over sodium sulfate. The solvent was removed under reduced pressure which

gave pure deuterated di-butyl amine (88%) yield with > 99% D. **<sup>1</sup>H NMR** (400 MHz, CDCl<sub>3</sub>): δ 2.59 (td, *J* = 7.2, 0.8 Hz, 4H), 1.55 – 1.41 (m, 4H), 1.40 – 1.25 (m, 4H), 0.92 (td, *J* = 7.2, 0.8 Hz, 6H); **HRMS** (ESI) Calcd for C<sub>8</sub>H<sub>18</sub>DN [M + H]<sup>+</sup> 131.1580, found 131.1570, We have also confirmed the incorporation of D by comparing <sup>1</sup>H NMR spectra of (*n*-Bu)<sub>2</sub>N-D spectra with (*n*-Bu)<sub>2</sub>N-H.

### General procedure for H/D Exchange experiments with aldehyde (1a):

**H/D Exchange experiments with Pd(OAc)<sub>2</sub> (Procedure 1):** In glove box, a 37 mL Schlenk tube was equipped with a magnetic stir bar was charged with 3-phenylpropanal **1a** (20.13 μL, 0.15 mmol), Pd(OAc)<sub>2</sub> (3.5 mg, 10 mol%), Cu(OAc)<sub>2</sub> (5.5 mg, 20 mol%). The tube was fitted with a rubber septum and moved out of the glove box. Then HFIP-*d*<sub>1</sub> (2 mL), CD<sub>3</sub>CO<sub>2</sub>D (80 μL, 10 equiv.), D<sub>2</sub>O (5.5 μL, 2 equiv.), and deuterated dibutylamine (*n*-Bu)<sub>2</sub>ND (10 μL, 40 mol %) were added to the Schlenk tube through the rubber septum using syringes. The tube was evacuated and filled with O<sub>2</sub> with three times and then the septum was replaced with a Teflon screwcap under O<sub>2</sub> flow. The reaction mixture was stirred at room temperature for 10 min, then at 50 °C for 40 h. After cooling to ambient temperature, the reaction mixture was diluted with 10 mL of DCM and filtered through a pad of silica gel and washed with additional 10 mL of ethyl acetate. The organic layer was concentrated in *vacuo* and analyzed by <sup>1</sup>H NMR to determine the H/D exchange.

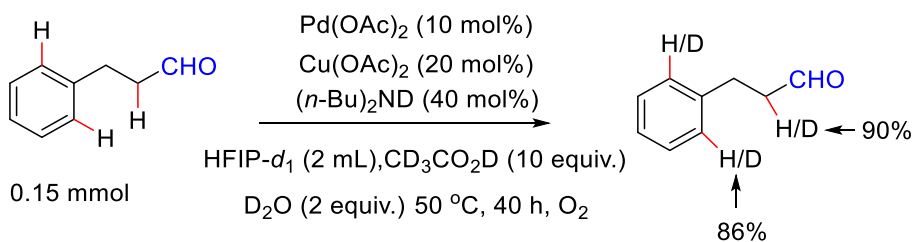

**Scheme S1** : H/D experiment with Pd(OAc)<sub>2</sub>

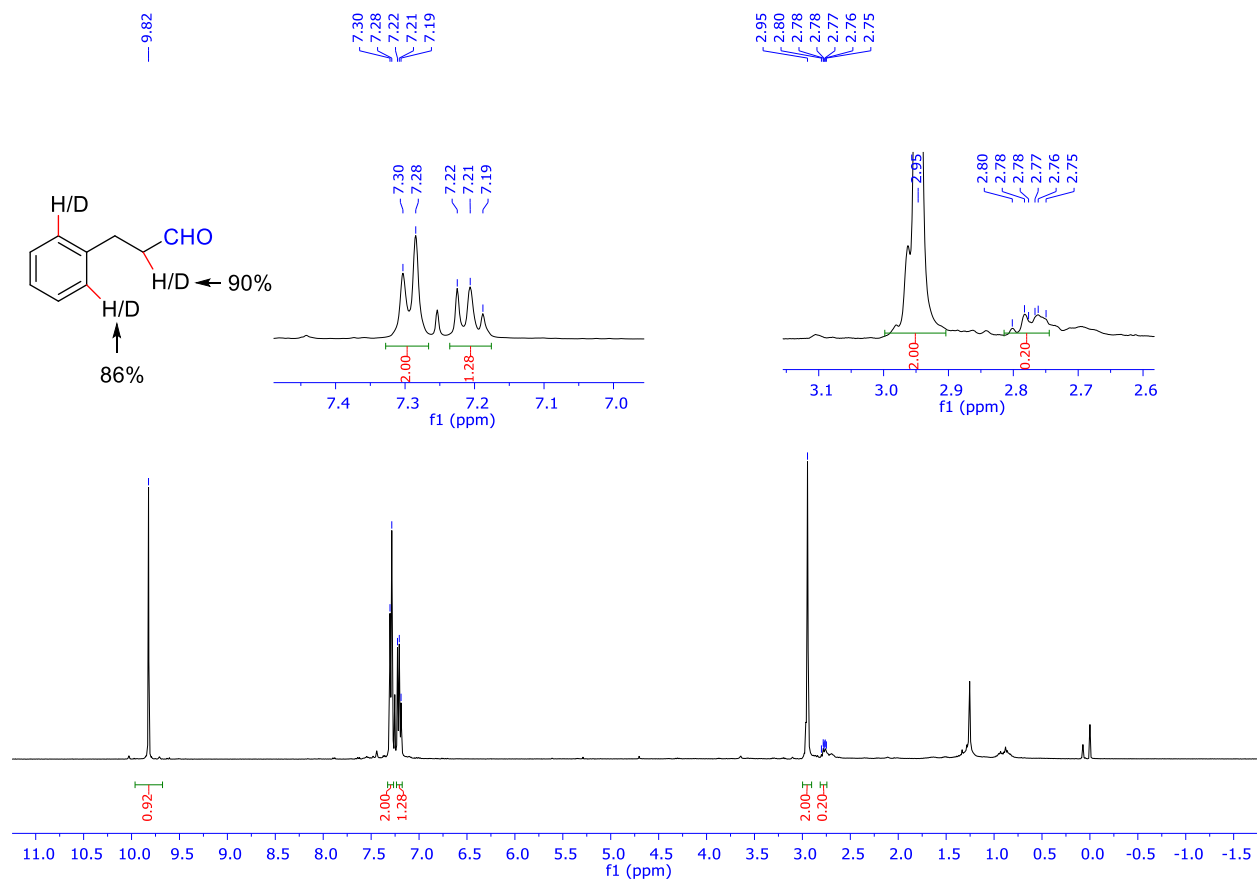

**Figure S1:** Crude <sup>1</sup>H NMR spectra of (*1a*) observed from H/D exchange experiment with Pd(OAc)<sub>2</sub>

**H/D Exchange experiments without Pd(OAc)<sub>2</sub>:** The above procedure (1) was followed without the addition of Pd(OAc)<sub>2</sub>

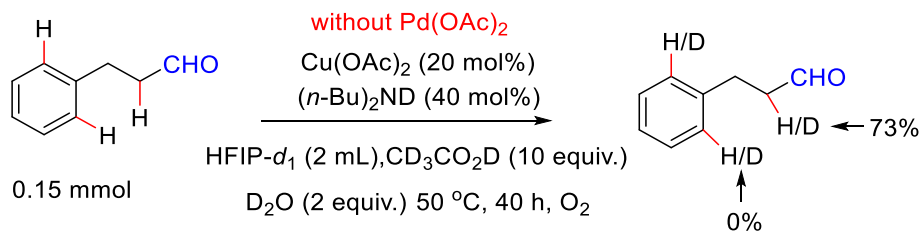

**Scheme S2 :** H/D experiment without Pd(OAc)<sub>2</sub>

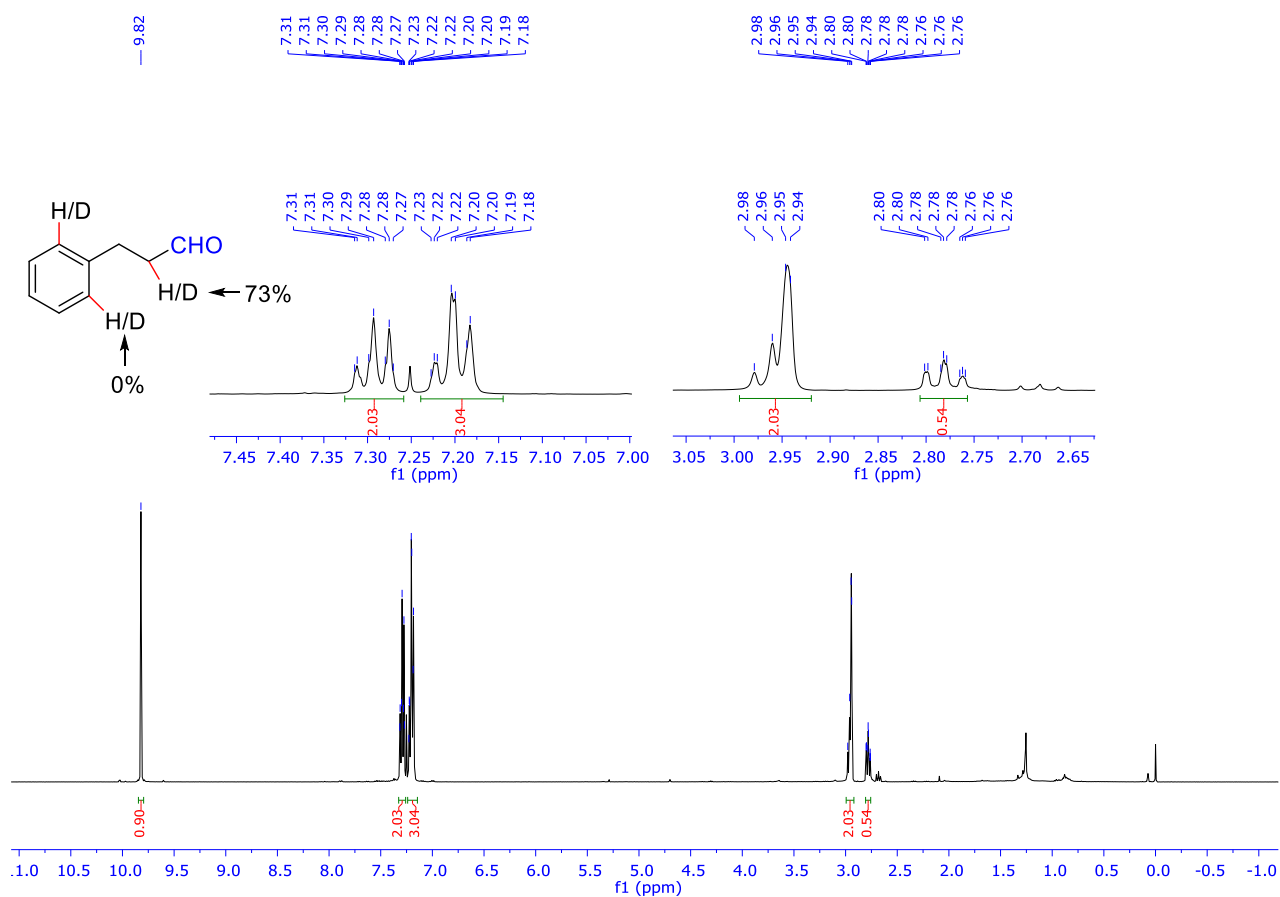

**Figure S2:** Crude <sup>1</sup>H NMR spectra of (*1a*) observed from H/D exchange experiment without Pd (OAc)<sub>2</sub>

**H/D Exchange experiments without amine:** The above procedure (1) was followed without the addition of  $(n\text{-Bu})_2\text{ND}$

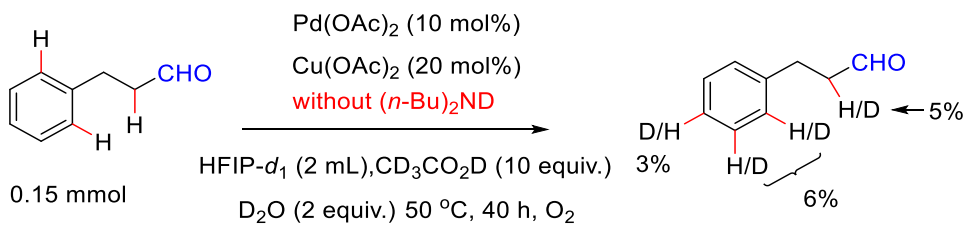

**Scheme S3 :** H/D experiment without amine

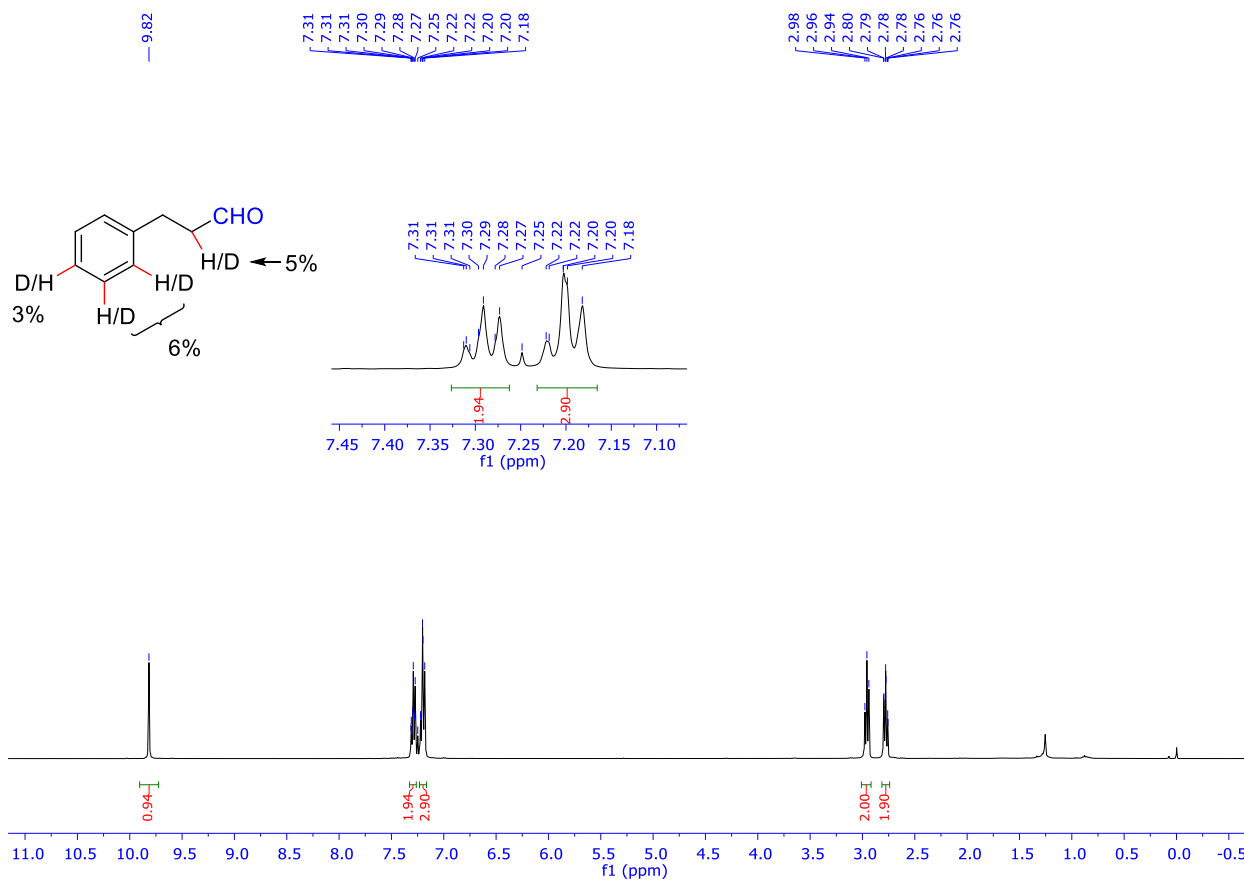

**Figure S3:** Crude <sup>1</sup>H NMR spectra of (*1a*) observed from H/D exchange experiment without amine

*Remark: ortho and meta proton difficult to distinguish*

## Experimental procedure for measurement of kinetic isotopic effect (KIE) values with **1a-D<sub>5</sub>**

### Intermolecular competition under standard reaction condition:

In glove box, a 37 mL Schlenk tube was equipped with a magnetic stir bar was charged with 3-phenylpropanal **1a** (10.6 mg, 0.075 mmol) and 3-phenylpropanal **1a-d<sub>5</sub>** (10.44 mg, 0.075 mmol), Pd(OAc)<sub>2</sub> (3.5 mg, 10 mol%), Cu(OAc)<sub>2</sub> (5.5 mg, 20 mol%). The tube was fitted with a rubber septum and moved out of the glove box. Then HFIP (2 mL), AcOH (80 μL, 10 equiv), H<sub>2</sub>O (5.5 μL, 2 equiv.) and dibutylamine (*n*-Bu)<sub>2</sub>NH (10 μL, 40 mol %) were added to the Schlenk tube through the rubber septum using syringes. The tube was evacuated and filled with O<sub>2</sub> with three times and then the septum was replaced with a Teflon screwcap under O<sub>2</sub> flow. The reaction mixture was stirred at room temperature for 10 min, then at 50 °C for 6 h. The reaction was cooled in an ice-bath and subsequently diluted with 10 mL of DCM and filtered through a pad of silica gel and washed with additional 10 mL of ethyl acetate. The organic layer was concentrated in *vacuo* and purified by flash column chromatography using silica gel (Eluent: 10% EtOAc /90% hexane) to afford **3a1/3a1-D<sub>4</sub>** (mono) and (Eluent: 15% EtOAc /85% hexane) **3a/3a-D<sub>3</sub>** (di) for which a deuterium content of 44.0% (for mono) and 27% (for di) was determined by <sup>1</sup>H NMR spectroscopy).  $k_H/k_D$  was calculated by considering both mono and di product which found to be 1.29.

### Kinetic Isotopic Effects:

### Intermolecular Reactions

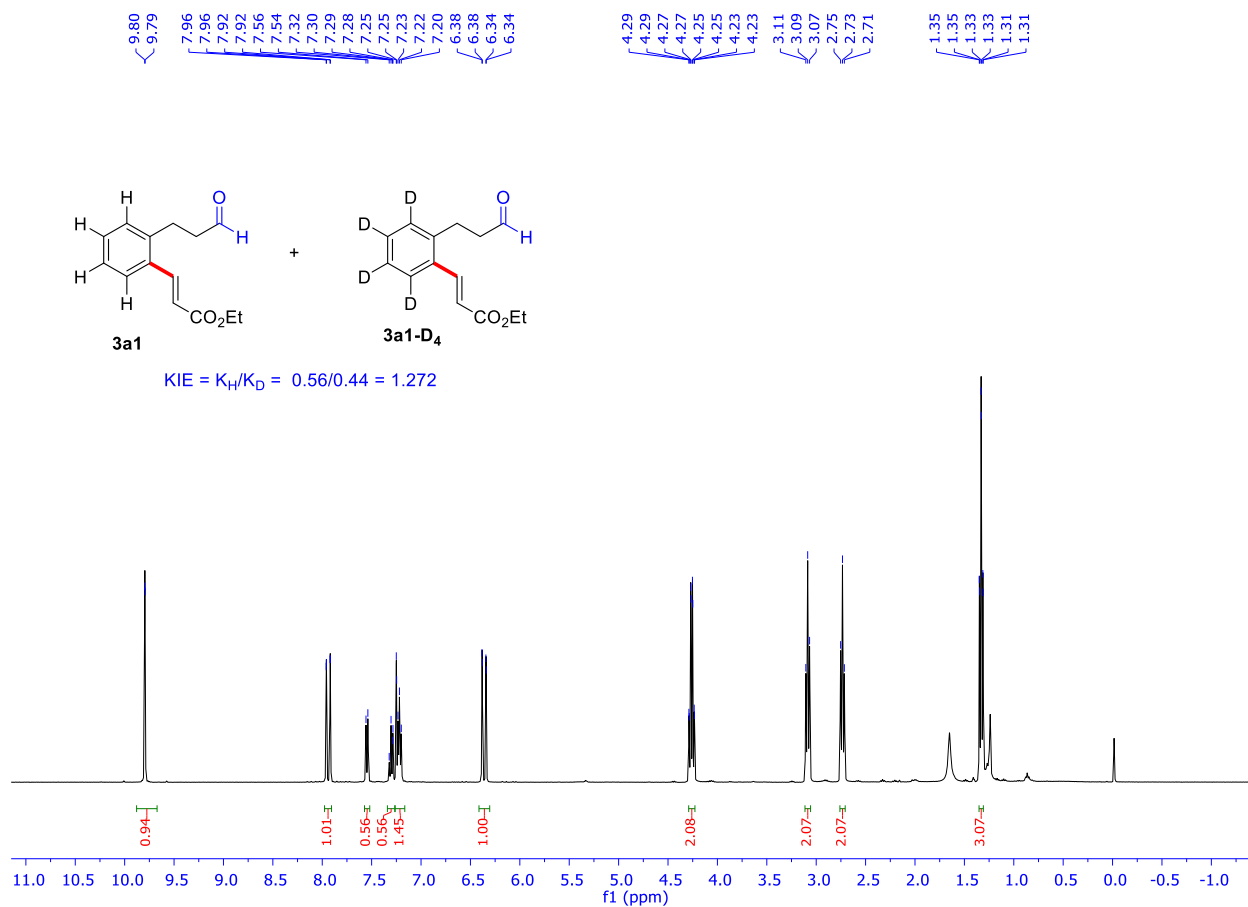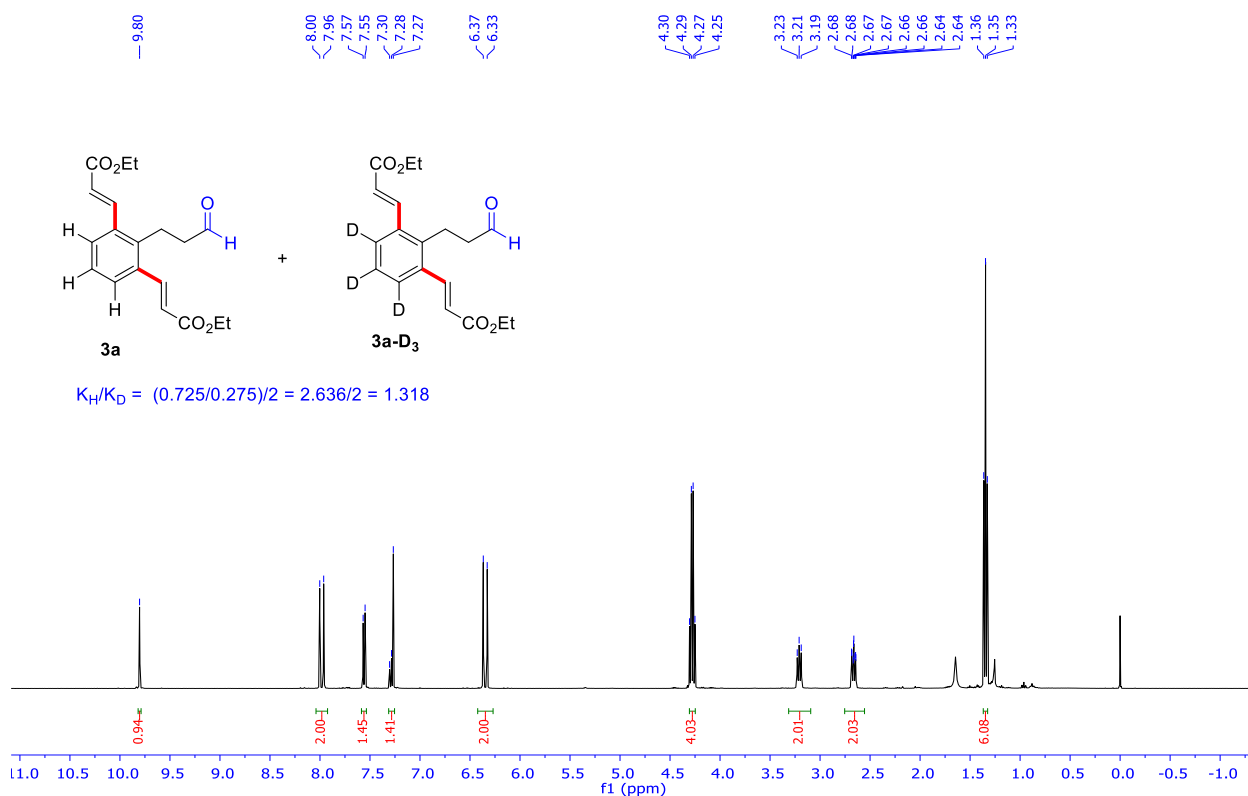



***KIE based on mono and di products:***

$$\text{KIE} = K_{\text{H/D (mono)}} + K_{\text{H/D (di)}} = 1.272 + 1.318$$

$$\text{KIE} = 2 K_{\text{H/D}} = 2.59$$

$$\text{KIE} = K_{\text{H/D}} = 2.59/2 = 1.295$$

$$\text{KIE} = \mathbf{K_{H/D} = 1.29}$$

**Intermolecular competition with all deuterated reagent:**

In glove box, a 37 mL Schlenk tube was equipped with a magnetic stir bar was charged with 3-phenylpropanal **1a** (10.6 mg, 0.075 mmol) and 3-phenylpropanal **1a-d5** (10.44 mg, 0.075 mmol), Pd(OAc)<sub>2</sub> (3.5 mg, 10 mol%), Cu(OAc)<sub>2</sub> (5.5 mg, 20 mol%). The tube was fitted with a rubber septum and moved out of the glove box. Then HFIP-*d*<sub>1</sub> (2 mL), CD<sub>3</sub>CO<sub>2</sub>D (80 μL, 10 equiv), D<sub>2</sub>O (5.5 μL, 2 equiv.) and deuterated dibutylamine (*n*-Bu)<sub>2</sub>ND (10 μL, 40 mol %) were added to the Schlenk tube through the rubber septum using syringes. The tube was evacuated and filled with O<sub>2</sub> with three times and then the septum was replaced with a Teflon screwcap under O<sub>2</sub> flow. The reaction mixture was stirred at room temperature for 10 min, then at 50 °C for 6 h. The reaction was cooled in an ice-bath and subsequently diluted with 10 mL of DCM and filtered through a pad of silica gel and washed with additional 10 mL of ethyl acetate. The organic layer was concentrated in *vacuo* and purified by flash column chromatography using silica gel (Eluent: 10% EtOAc /90% hexane) to afford **3a1/3a1-D<sub>6</sub>** (mono) and (Eluent: 15% EtOAc /85% hexane) **3a/3a-D<sub>5</sub>** (di) for which a deuterium content of 45.0% (for mono) and 27% (for di) was determined by <sup>1</sup>H NMR spectroscopy). *k<sub>H</sub>/k<sub>D</sub>* was calculated by considering both mono and di product which found to be 1.29.

**Kinetic Isotopic Effects:**

**Intermolecular Reactions**

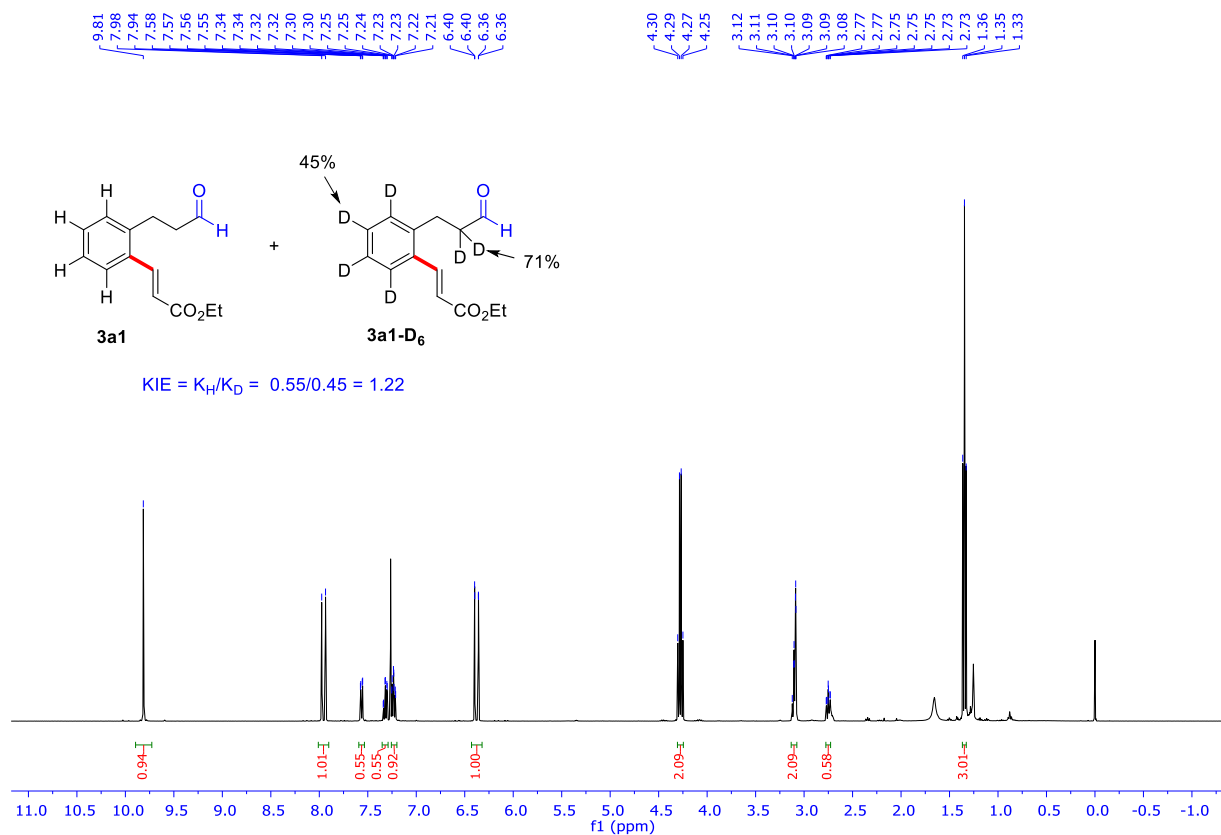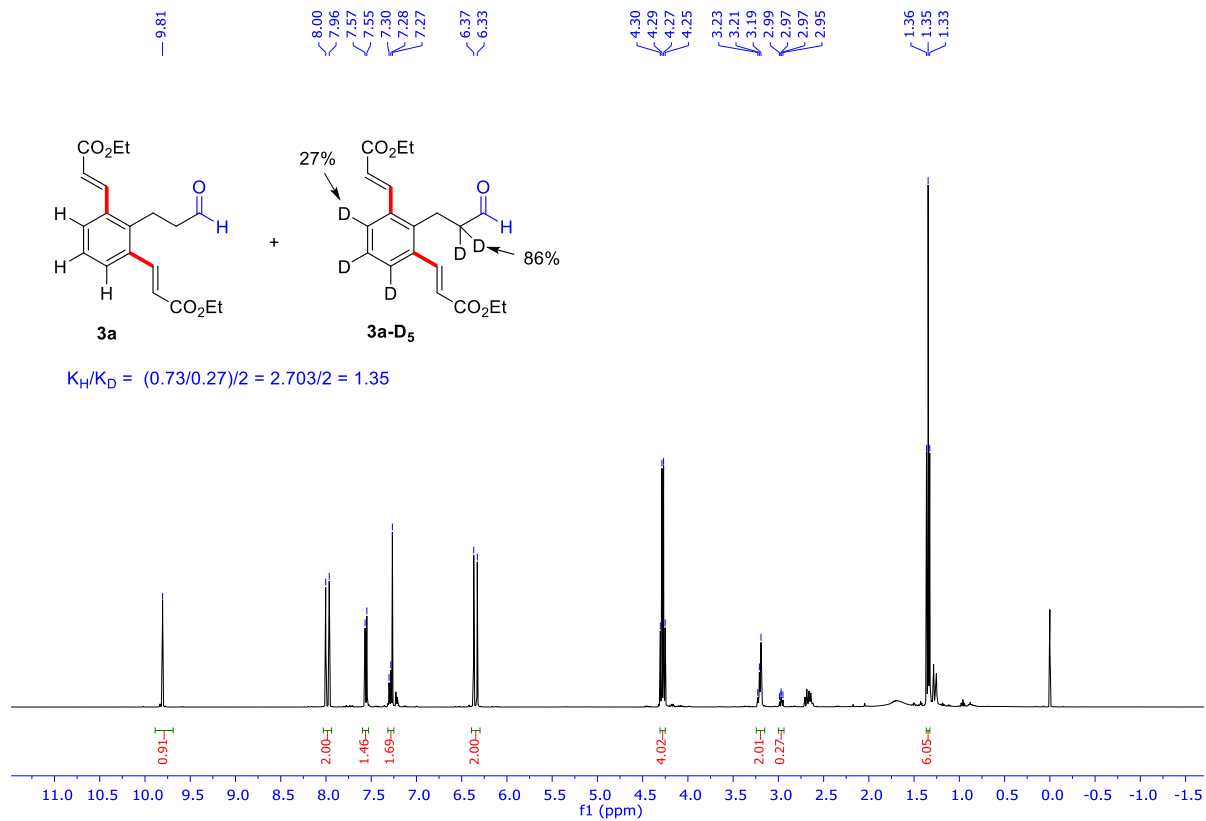

**KIE based on mono and di products under deuterated condition:**

$$\text{KIE} = \text{K}_{\text{H/D}} (\text{mono}) + \text{K}_{\text{H/D}} (\text{di}) = 1.22 + 1.35$$

$$\text{KIE} = 2 \text{K}_{\text{H/D}} = 2.57$$

$$\text{KIE} = \text{K}_{\text{H/D}} = 2.57/2 = 1.29$$

$$\text{KIE} = \mathbf{K}_{\text{H/D}} = \mathbf{1.29}$$

From the above *intermolecular competition* reactions, similar KIE value was observed under deuterated (1.29) and non-deuterated (1.29) reaction conditions.

**General procedure for the Parallel KIE experiments<sup>21</sup>**

In glove box, a 37 mL Schlenk tube was equipped with a magnetic stir bar was charged with 3-phenylpropanal **1a** (10.6 mg, 0.075 mmol), or 3-phenylpropanal **1a-d5** (10.44 mg, 0.075 mmol), Pd(OAc)<sub>2</sub> (3.5 mg, 10 mol%), Cu(OAc)<sub>2</sub> (5.5 mg, 20 mol%). The tube was fitted with a rubber septum and moved out of the glove box. Then HFIP (2 mL), AcOH (80 μL, 10 equiv), H<sub>2</sub>O (5.5 μL, 2 equiv) and dibutylamine (n-Bu)<sub>2</sub>NH (10 μL, 40 mol %) were added to the Schlenk tube through the rubber septum using syringes. The tube was evacuated and filled with O<sub>2</sub> with three times and then the septum was replaced with a Teflon screwcap under O<sub>2</sub> flow. The reaction mixture was stirred at room temperature for 10 min, then at 50 °C for the indicated time: 1 h, 2 h, 3 h, 4h, 5 h and 6h (six parallel runs). After cooling rapidly in ice cold water, the reaction mixture was diluted with 10 mL of DCM and passed through small pad of silica gel and washed with additional 10 mL of DCM. The solvents were removed under vacuum. The yield of the mono-olefinated and di-olefinated products was determined by <sup>1</sup>H NMR analysis of the crude using dibromomethane as internal standard by integration of the benzylic methylene proton signals which appear as triplet due to two protons (approximately 3.2 ppm, respectively). The resulting data was analyzed using Microsoft Excel. For (**3a1+3a**),  $y = 5.2286x + 7.5333$ ,  $R^2 = 0.9747$ , for (**3a1-d4 + 3a-d3**),  $y = 4.3143x + 0.7333$ ,  $R_2 = 0.967$ . KIE value (1.21) was determined by comparing the relative initial rates.

| Time (h) | Mono + Di                  |                                    |
|----------|----------------------------|------------------------------------|
|          | NMR Yield ( $3a_1 + 3a$ )% | NMR Yield ( $3a_1-d_4 + 3a-d_3$ )% |
| 1        | 11+1 = 12                  | 5+0 = 5                            |
| 2        | 14+3 = 17                  | 8+1 = 9                            |
| 3        | 17+7 = 24                  | 12+2 = 14                          |
| 4        | 20+11 = 31                 | 14+3 = 17                          |
| 5        | 20+12 = 34                 | 19+6 = 25                          |
| 6        | 21+16 = 37                 | 18+7 = 25                          |

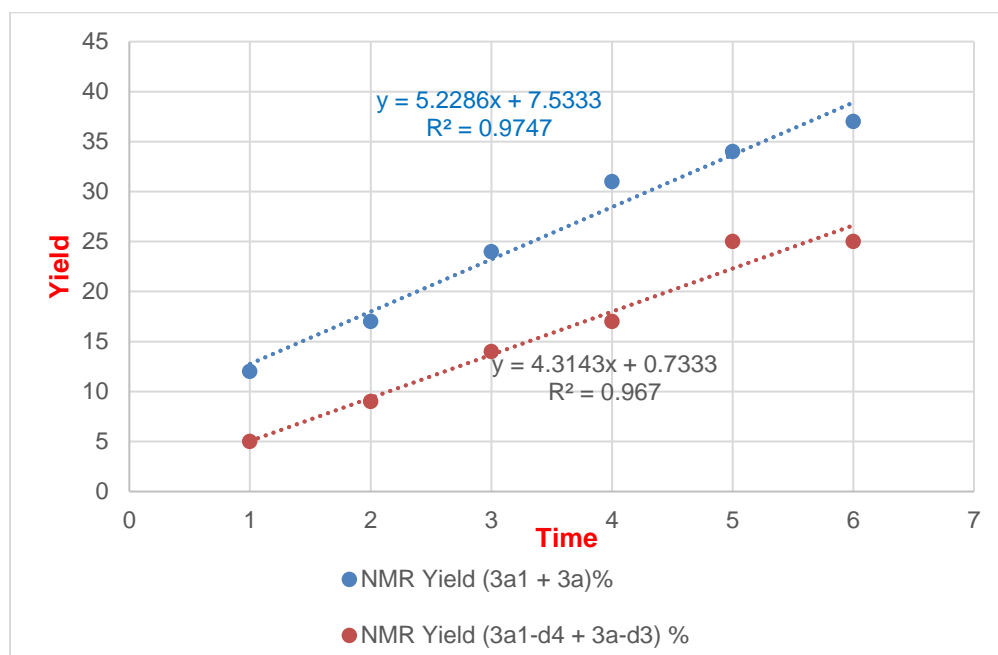

**Figure S4:** Initial rate data for the formation of (3a1+3a) and (3a1-d<sub>4</sub>+ 3a-d<sub>3</sub>)

**Intermolecular competition experiment between 3-(p-tolyl)propanal (**1b**) and methyl 4-(3-oxopropyl)benzoate (**1i**):**

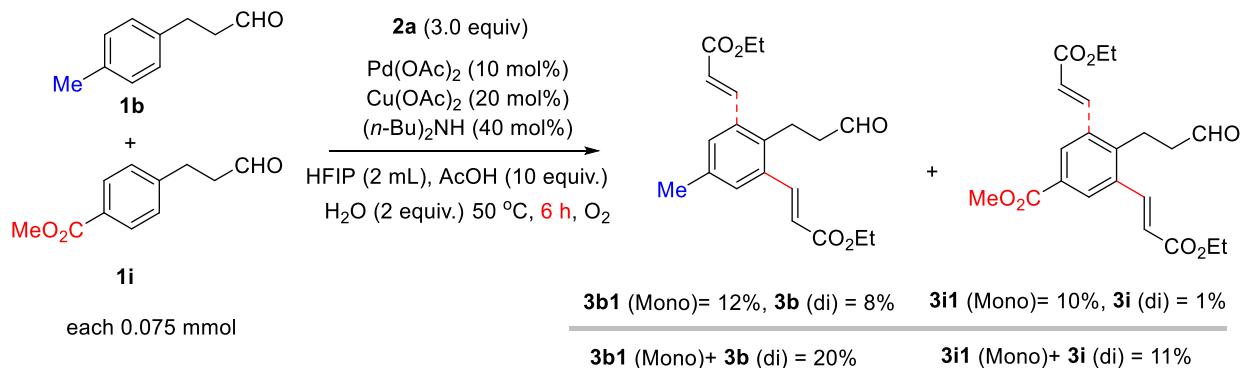

**Scheme S4:** Competitive reaction between electron rich and electron poor substrate

In glove box, a 37 mL Schlenk tube was equipped with a magnetic stir bar was charged with 3-(p-tolyl)propanal **1b** (11.16 mg, 0.075 mmol) and methyl 4-(3-oxopropyl)benzoate **1i** (14.42 mg, 0.075 mmol), Pd(OAc)<sub>2</sub> (3.5 mg, 10 mol%), Cu(OAc)<sub>2</sub> (5.5 mg, 20 mol%). The tube was fitted with a rubber septum and moved out of the glove box. Then HFIP (2 mL), AcOH (80 μL, 10 equiv), H<sub>2</sub>O (5.5 μL, 2 equiv.) and dibutylamine (*n*-Bu)<sub>2</sub>NH (10 μL, 40 mol %) were added to the Schlenk tube through the rubber septum using syringes. The tube was evacuated and filled with O<sub>2</sub> with three times and then the septum was replaced with a Teflon screwcap under O<sub>2</sub> flow. The reaction mixture was stirred at room temperature for 10 min, then at 50 °C for 6 h. The reaction was cooled in an ice-bath and subsequently diluted with 10 mL of DCM and filtered through a pad of silica gel and washed with additional 10 mL of ethyl acetate. The organic layer was concentrated in *vacuo*. The yield of the mono-olefinated and di-olefinated products were determined by <sup>1</sup>H NMR analysis of the crude using dibromomethane as internal standard by integration of the alkene proton signals which appear as doublet due to one protons (approximately 6.5 ppm, respectively).

|      | Me               | vs | CO <sub>2</sub> Me | Yield        |
|------|------------------|----|--------------------|--------------|
| Mono | <b>3b1</b> = 12% |    | <b>3i1</b> = 10%   | 12:10        |
| Di   | <b>3b</b> = 8%   |    | <b>3i</b> = 1%     | 8:1          |
|      |                  |    |                    | <b>20:11</b> |

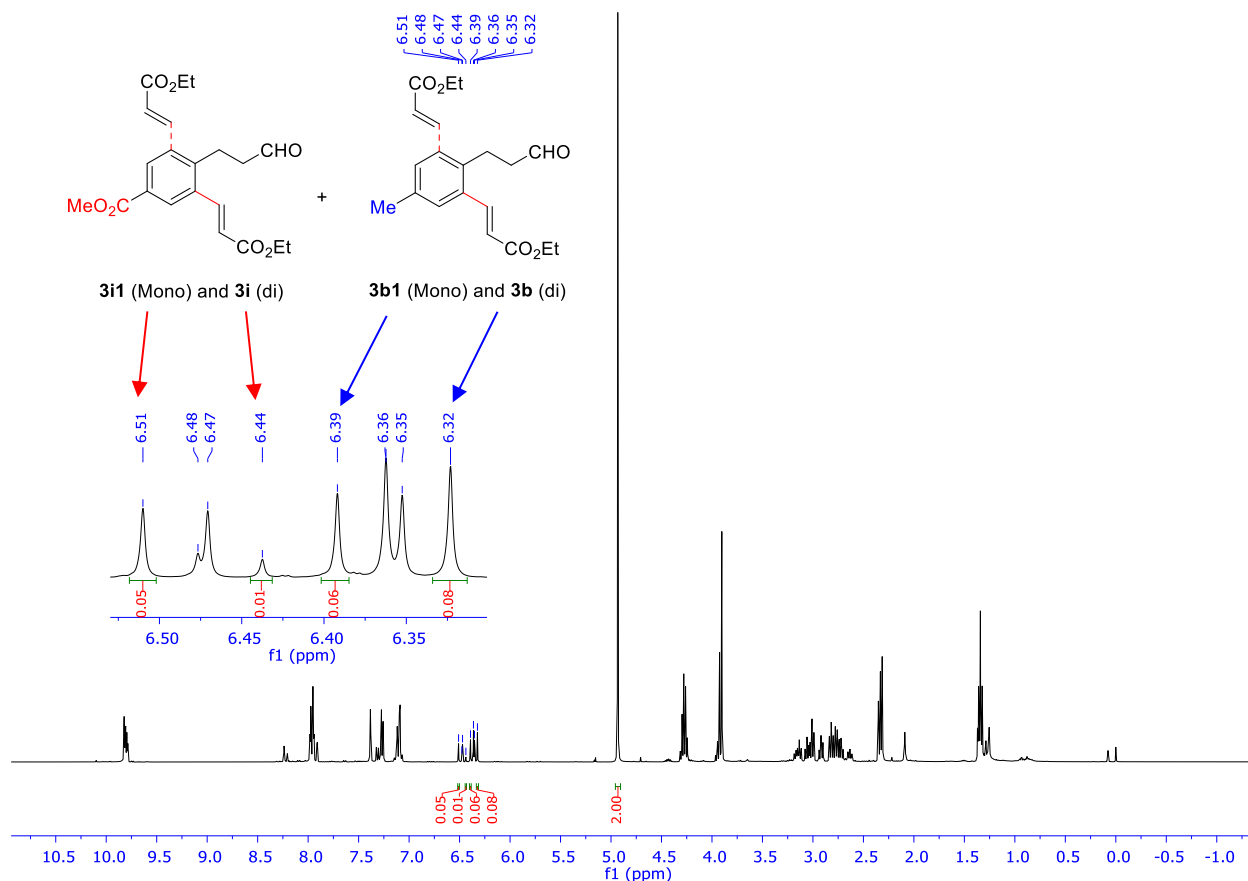

Figure S5: <sup>1</sup>H NMR spectra of crude reaction mixture after 6h

### Intermolecular competition experiment between 3-phenyl propanal (**1a**) and methyl 4-(3-oxopropyl)benzoate (**1i**):

Under similar reaction condition as mention above, a intermolecular competition experiment was carried out between 3-phenyl propanal **1a** (10.06 mg, 0.075 mmol) and methyl 4-(3-oxopropyl)benzoate **1i** (14.42 mg, 0.075 mmol).

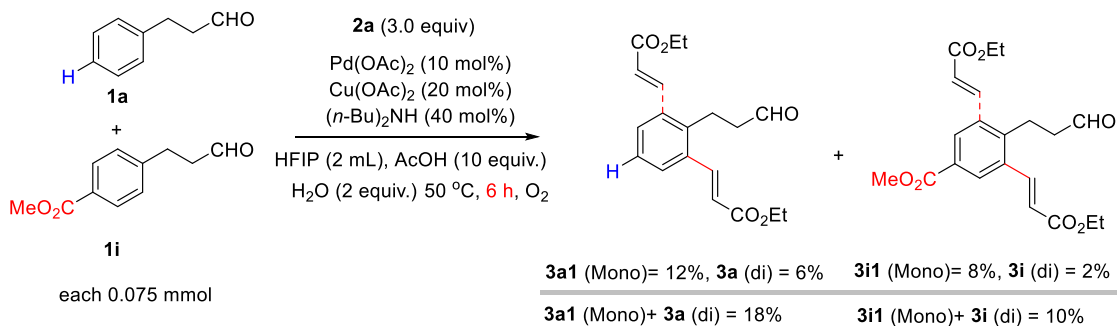

**Scheme S5:** Competitive reaction between electron neutral and electron poor substrate

|         | H                | vs | CO <sub>2</sub> Me | Yield |
|---------|------------------|----|--------------------|-------|
| Mono    | <b>3a1</b> = 12% |    | <b>3i1</b> = 8%    | 12:8  |
| Di      | <b>3a</b> = 6%   |    | <b>3i</b> = 2%     | 6:2   |
| Mono+Di |                  |    |                    | 18:10 |

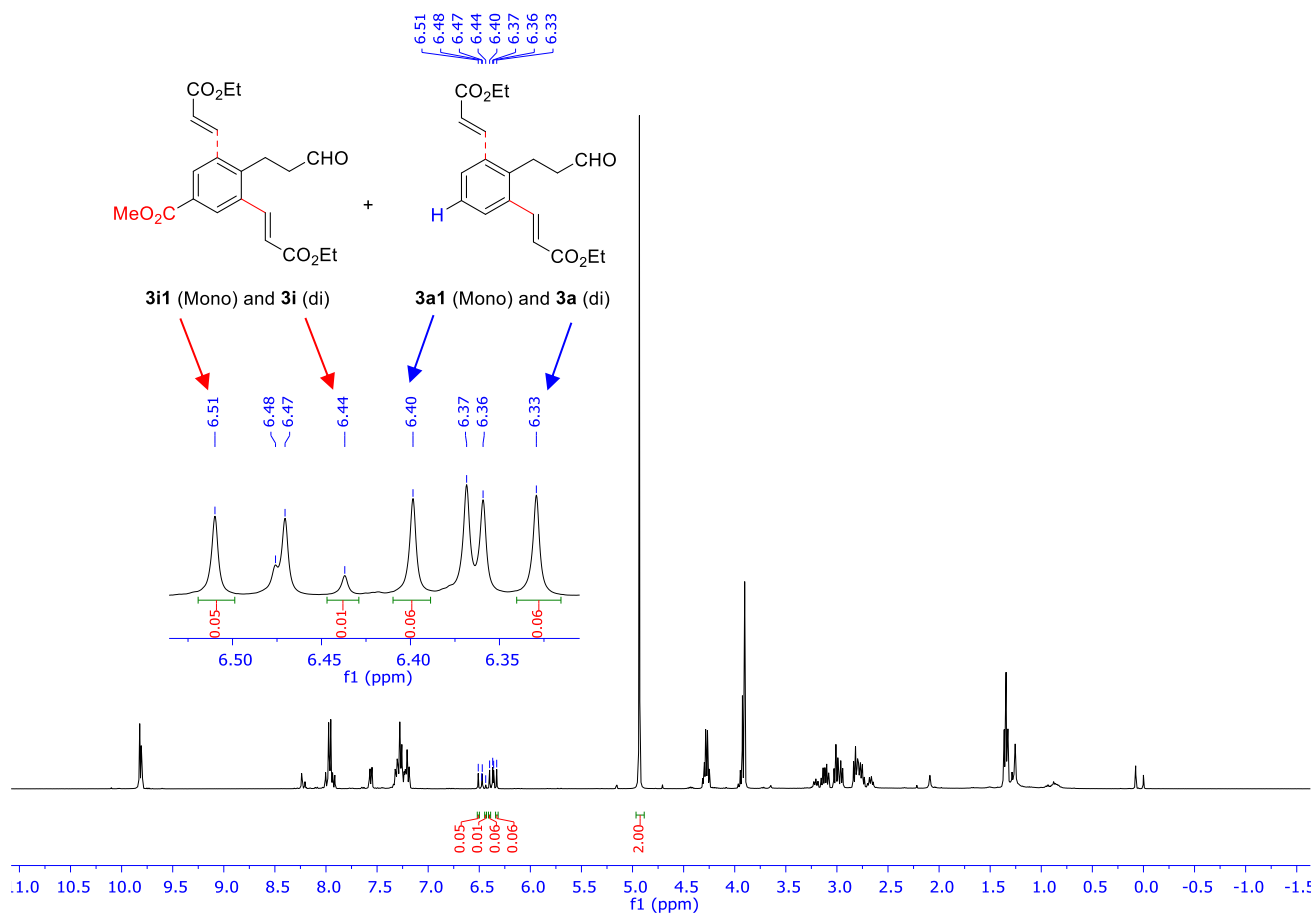

**Figure S6:** <sup>1</sup>H NMR spectra of crude reaction mixture after 6h

**Conclusion:** The intermolecular competition between electron rich or neutral and electron poor substrates suggests that substrates bearing electron donating group in *meta* position of the CH functionalization site are more reactive with respect to mono-product, di-products even combining both mono and di-product. These results could indicate that the C-H activation step might occur through an electrophilic type mechanism.

### Control Experiments:

To ascertain the role of electrophilic palladation some control experiment has been performed under standard reaction conditions. The reaction of 3-phenylpropanal **1a**, without ethyl acrylate (**2a**) showed the formation of dehydrogenated product (**1ag**) 8% yield with some unreacted starting material. This observation compliance with the previous report<sup>22</sup>, where electrophilic palladation of the nucleophilic enamine gave intermediate **I**, which undergoes  $\beta$ -hydride elimination followed by hydrolysis to give **1ag**. The control experiments without di-butyl amine (**A**) ruled out the possibility dehydrogenation *via* keto-Enol tautomerization pathway.<sup>23</sup> The reaction without Pd(OAc)<sub>2</sub> also diminished the involvement of palladium promoted dehydrogenation. These observations support the involvement of electrophilic palladation at the  $\alpha$  C atom.

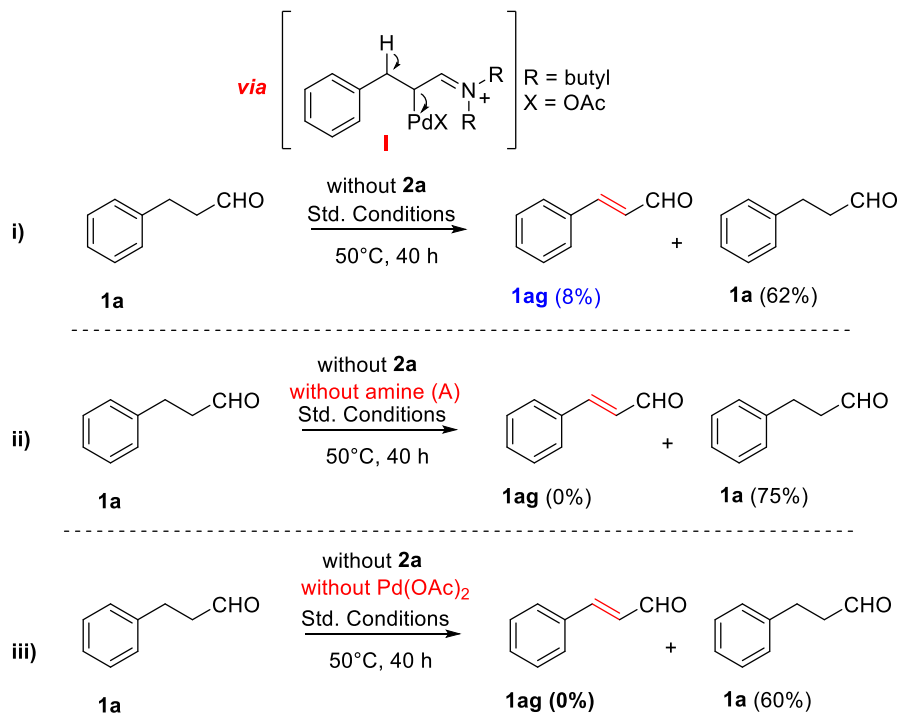

Figure S7: Control experiments under std. reaction condition



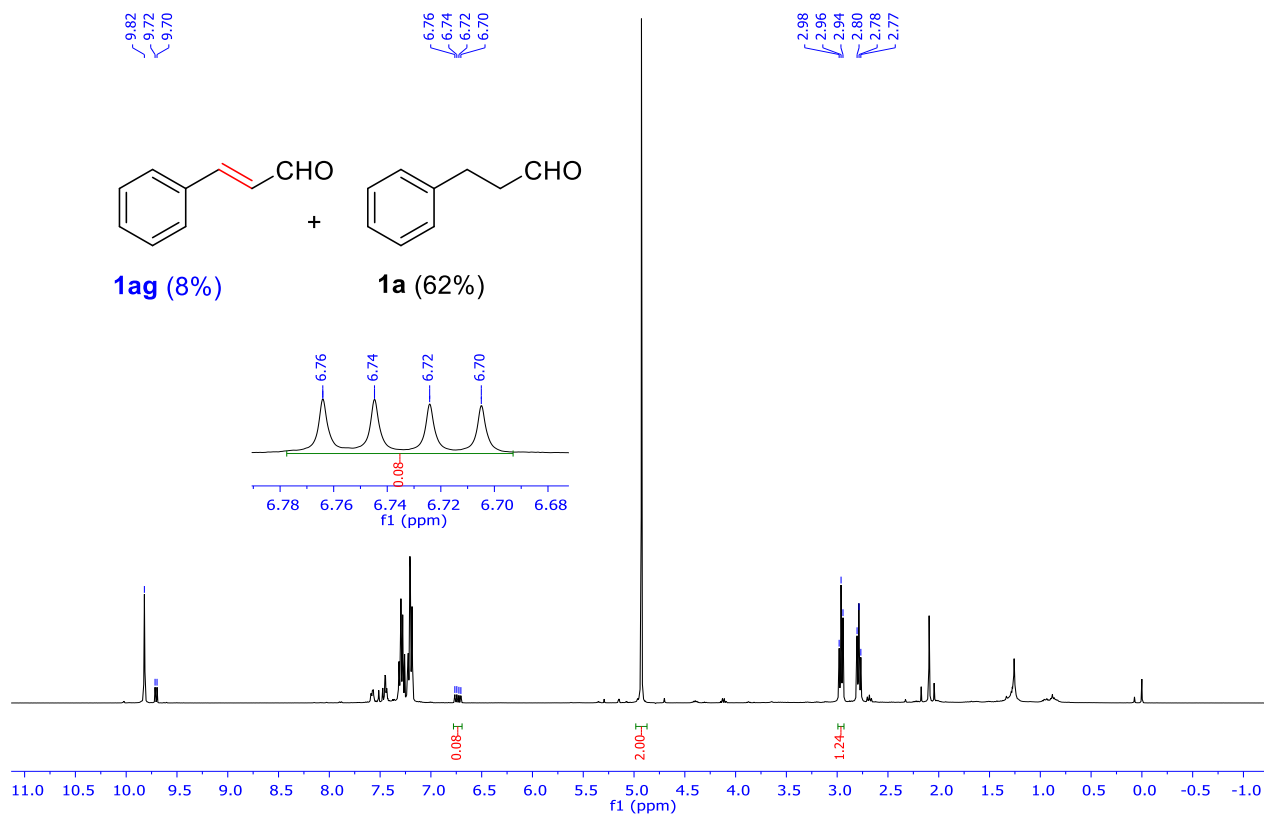

**Figure S8:** <sup>1</sup>H NMR spectra of crude reaction mixture under std. reaction condition without **2a**

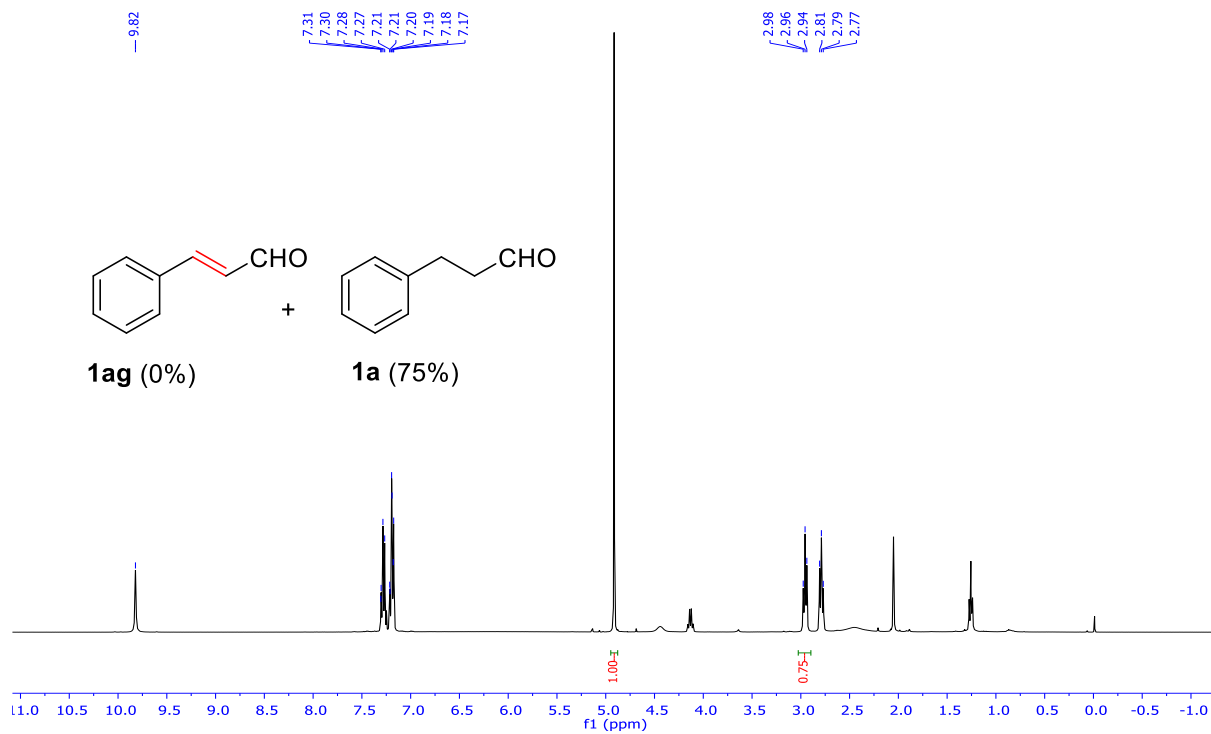

**Figure S9:** <sup>1</sup>H NMR spectra of crude reaction mixture under std. reaction condition without **2a** and **amine**.

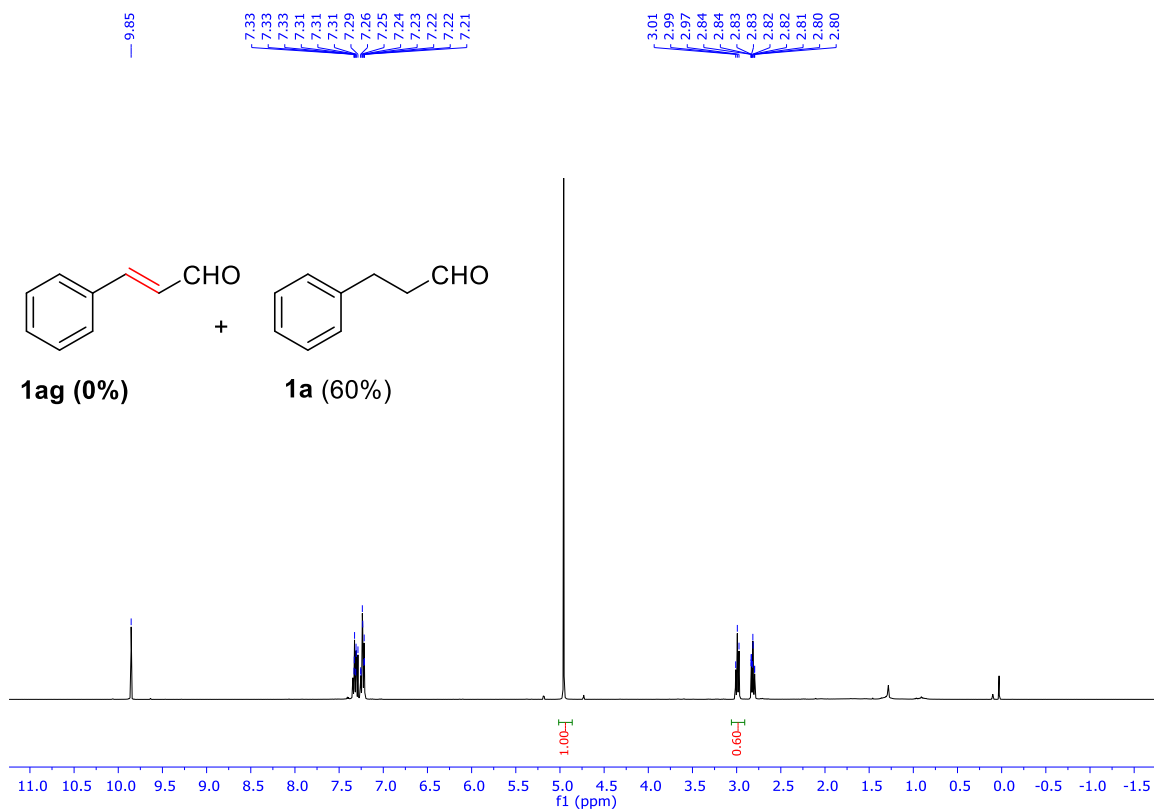

**Figure S10:**  $^1\text{H}$ NMR spectra of crude reaction mixture under std. reaction condition without **2a** and  $\text{Pd}(\text{OAc})_2$

**General procedure for synthesis of Enamine:**

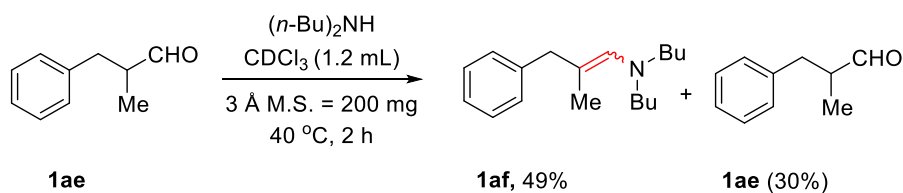

**Scheme S5a:** Synthesis of enamine **1af**

**Method g:** Molecular sieves (3 Å, 200 mg) were added to a solution of aldehyde (0.15 mmol) in  $\text{CDCl}_3$  (1.2 mL) at room temperature. The solution was cooled to  $0\text{ }^\circ\text{C}$ , then the secondary amine (1.2 equiv.) was added and the reaction mixture was stirred at  $40\text{ }^\circ\text{C}$  for 2-3 h. Conversion of the aldehyde to the enamine was checked by  $^1\text{H}$  NMR spectra of 0.6 mL aliquots sampled from the reaction mixture, filtered, and diluted with  $\text{CDCl}_3$  in an NMR tube. The internal standard dimromomethanewas added to check to calculate the yield.

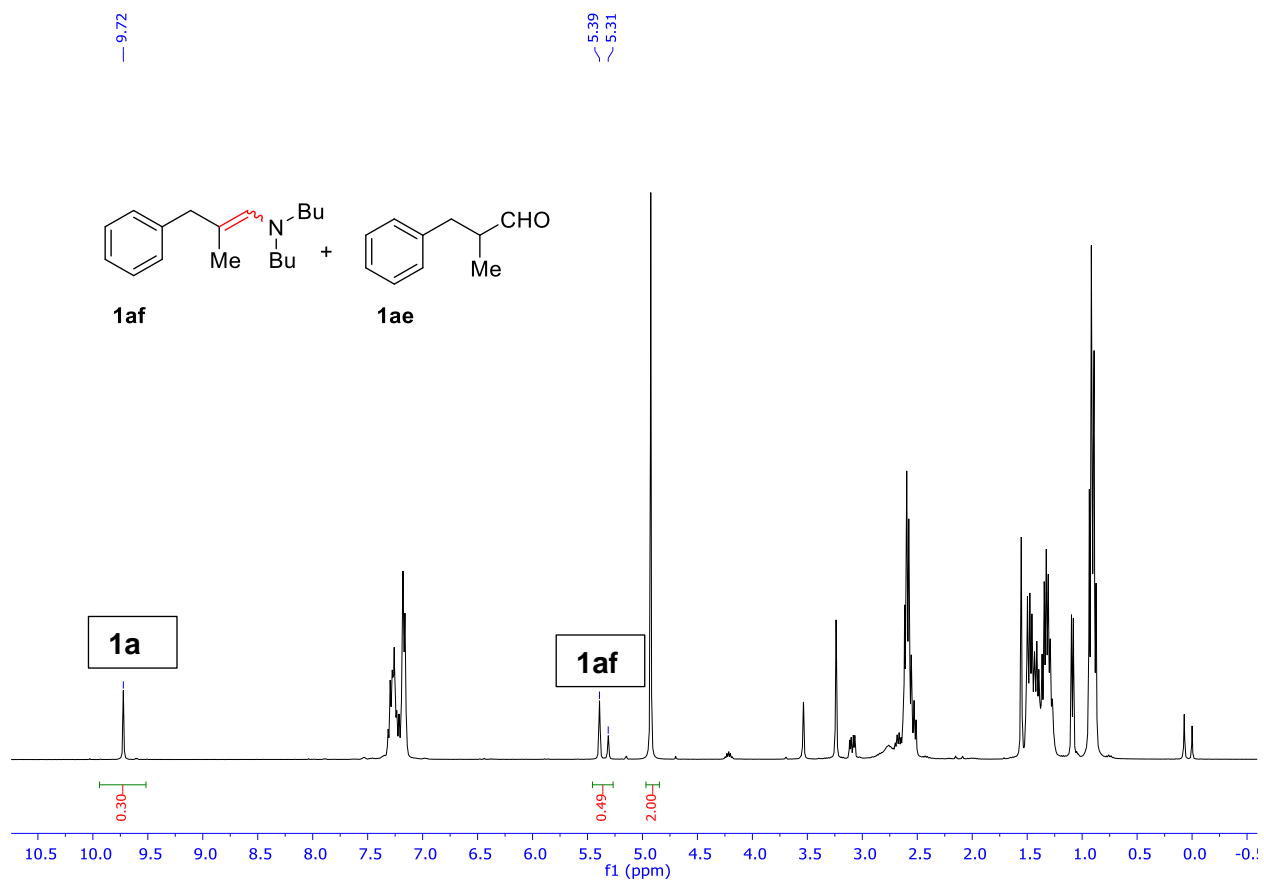

**Figure S11:**  $^1\text{H NMR}$  spectra of crude reaction mixture of reaction **1ae** and  $(n\text{-Bu})_2\text{NH}$  after 2h.

## Enamine formation under various reaction conditions:

Enamine formation in CDCl<sub>3</sub> solvent (without Pd, Cu(OAc)<sub>2</sub> and AcOH):

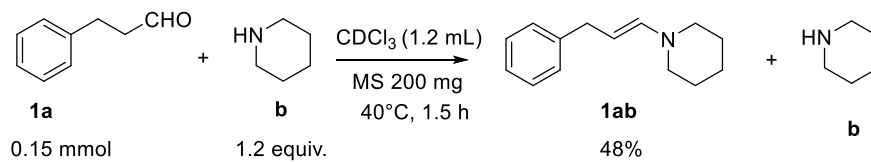

Scheme S6: Enamine formation of **1a** with **b** in CDCl<sub>3</sub> solvent

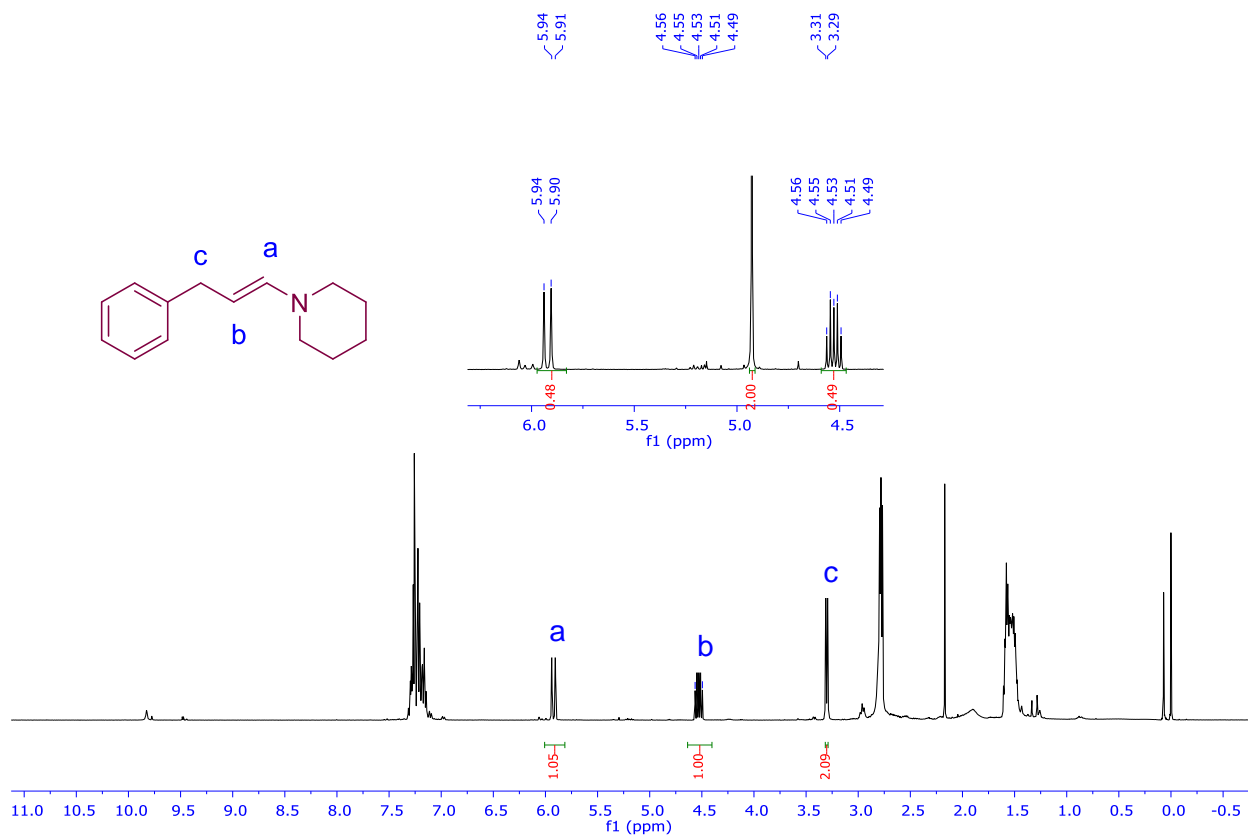

Figure S12: Crude <sup>1</sup>H NMR spectra of reaction **1a** and **b** in CDCl<sub>3</sub>

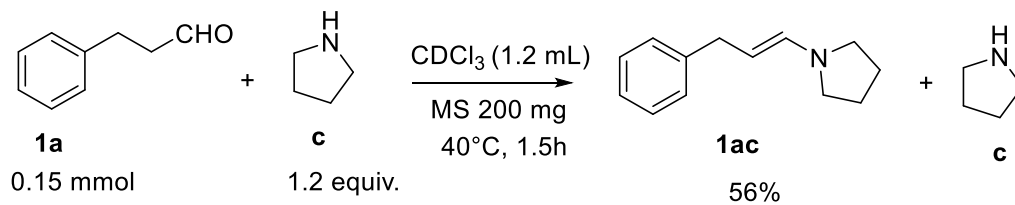

**Scheme S7:** Enamine formation of **1a** with **c** in  $\text{CDCl}_3$  solvent

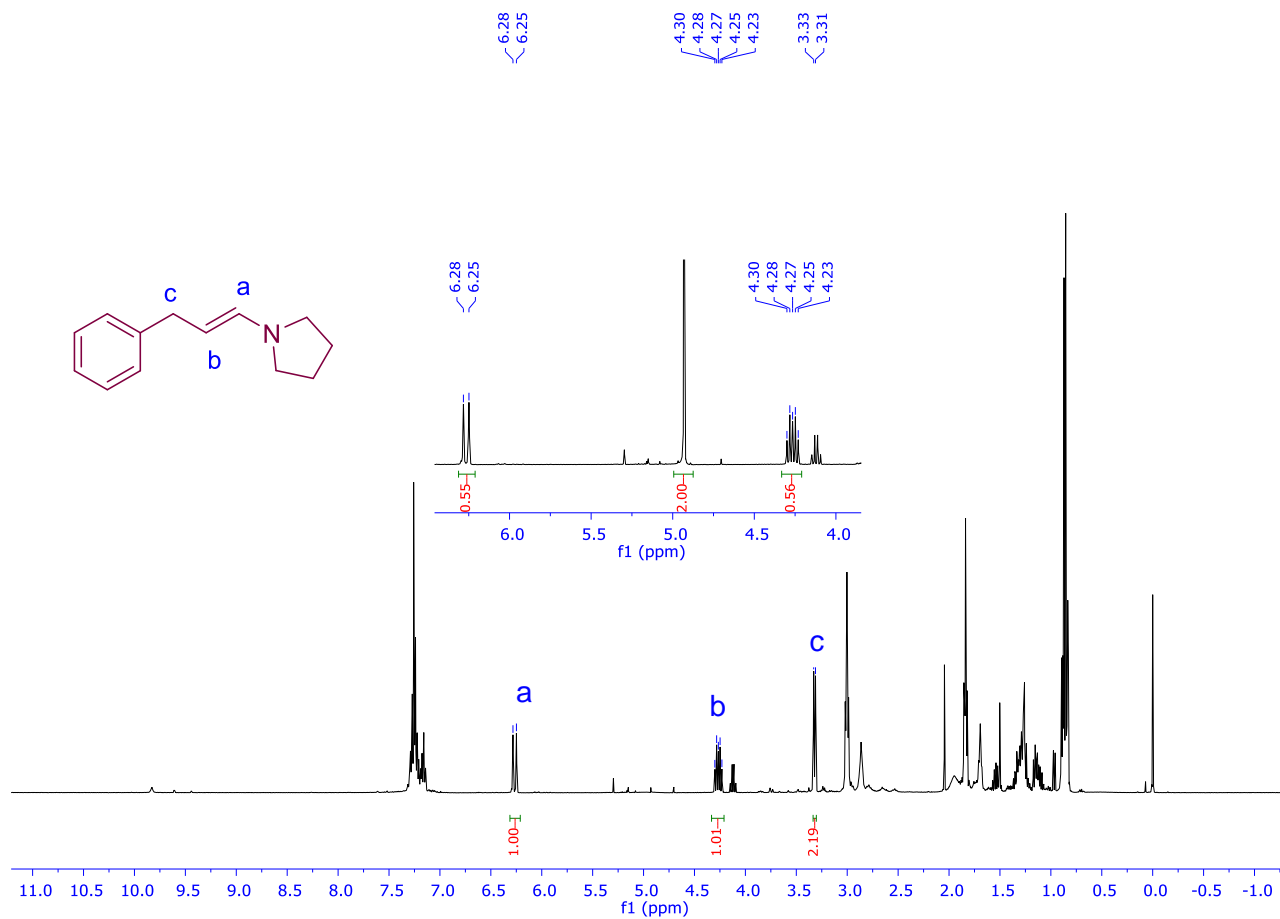

**Figure S13:** Crude  $^1\text{H}$  NMR spectra of reaction **1a** and **c** in  $\text{CDCl}_3$

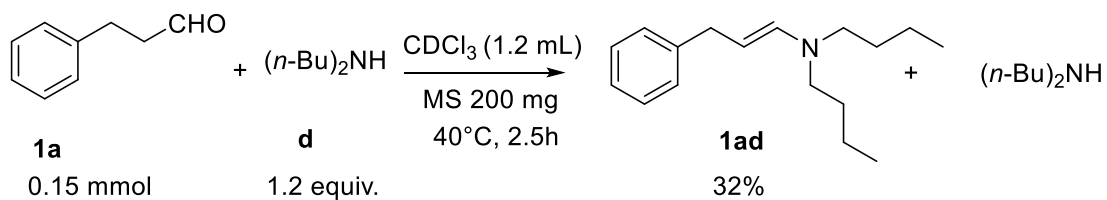

**Scheme S8:** Enamine formation of **1a** with **d** in  $\text{CDCl}_3$  solvent

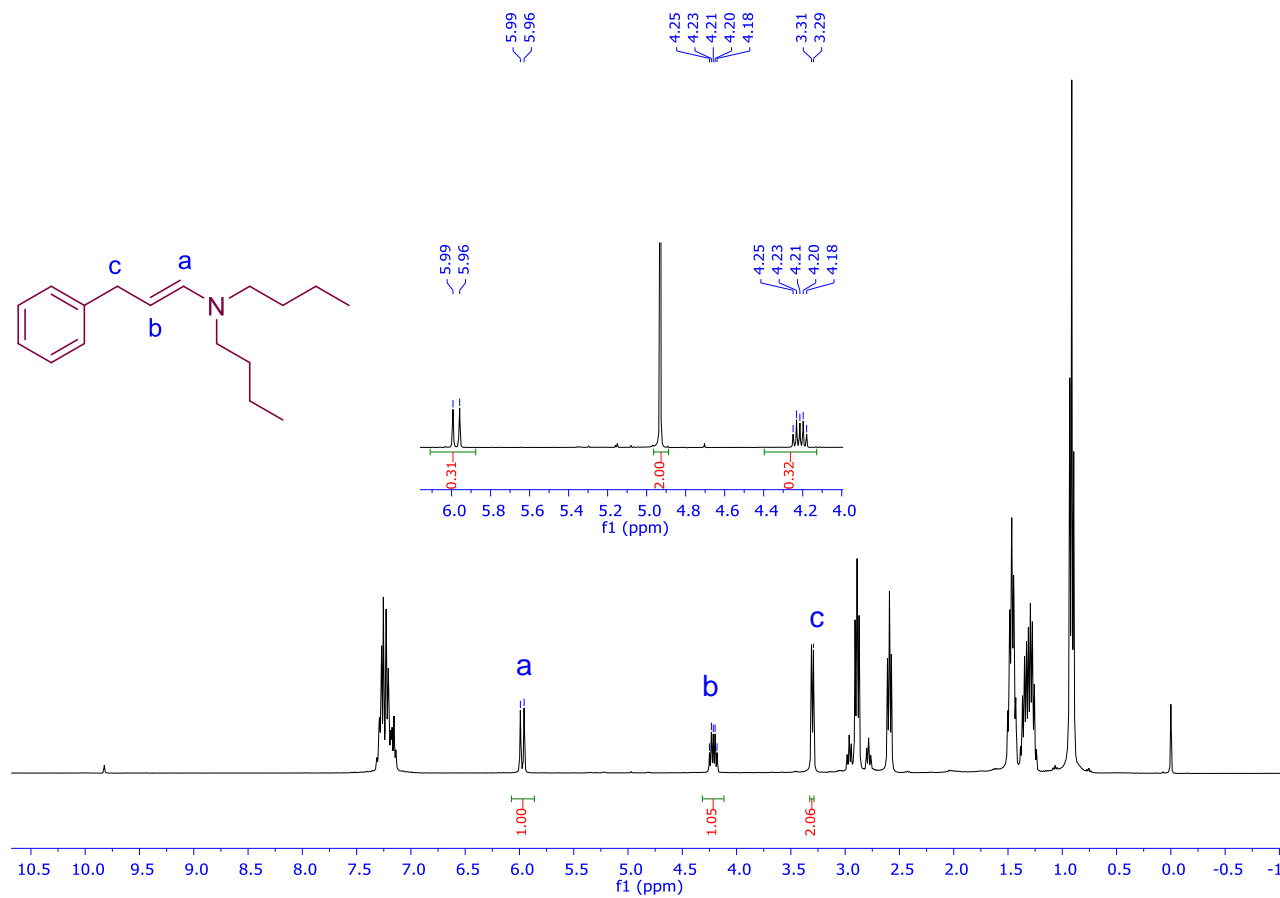

**Figure S14:** Crude  $^1\text{H}$  NMR spectra of reaction **1a** and **d** in  $\text{CDCl}_3$

From the above experiments (Scheme S6-S8) it can be concluded that enamine formation is not the problem associated with inactiveness of cyclic amine (A7, A8) compare to acyclic amine (A).

**Enamine formation in HFIP solvent (without Pd, Cu(OAc)<sub>2</sub>, AcOH):**

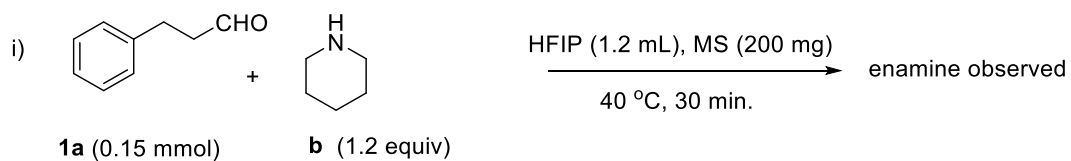

**Scheme S9:** Enamine formation of **1a** with **b** in HFIP solvent

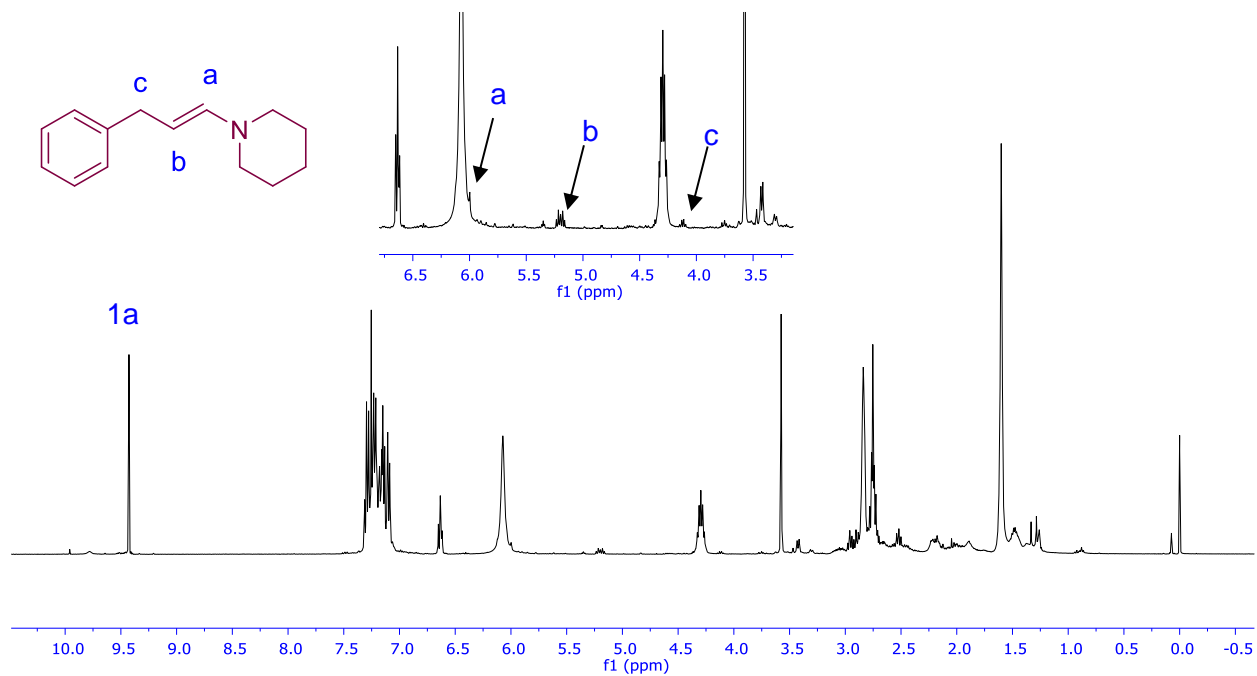

**Crude <sup>1</sup>H NMR spectra of reaction 1a and b in HFIP**





### <sup>1</sup>H NMR Interaction of amine and HFIP:

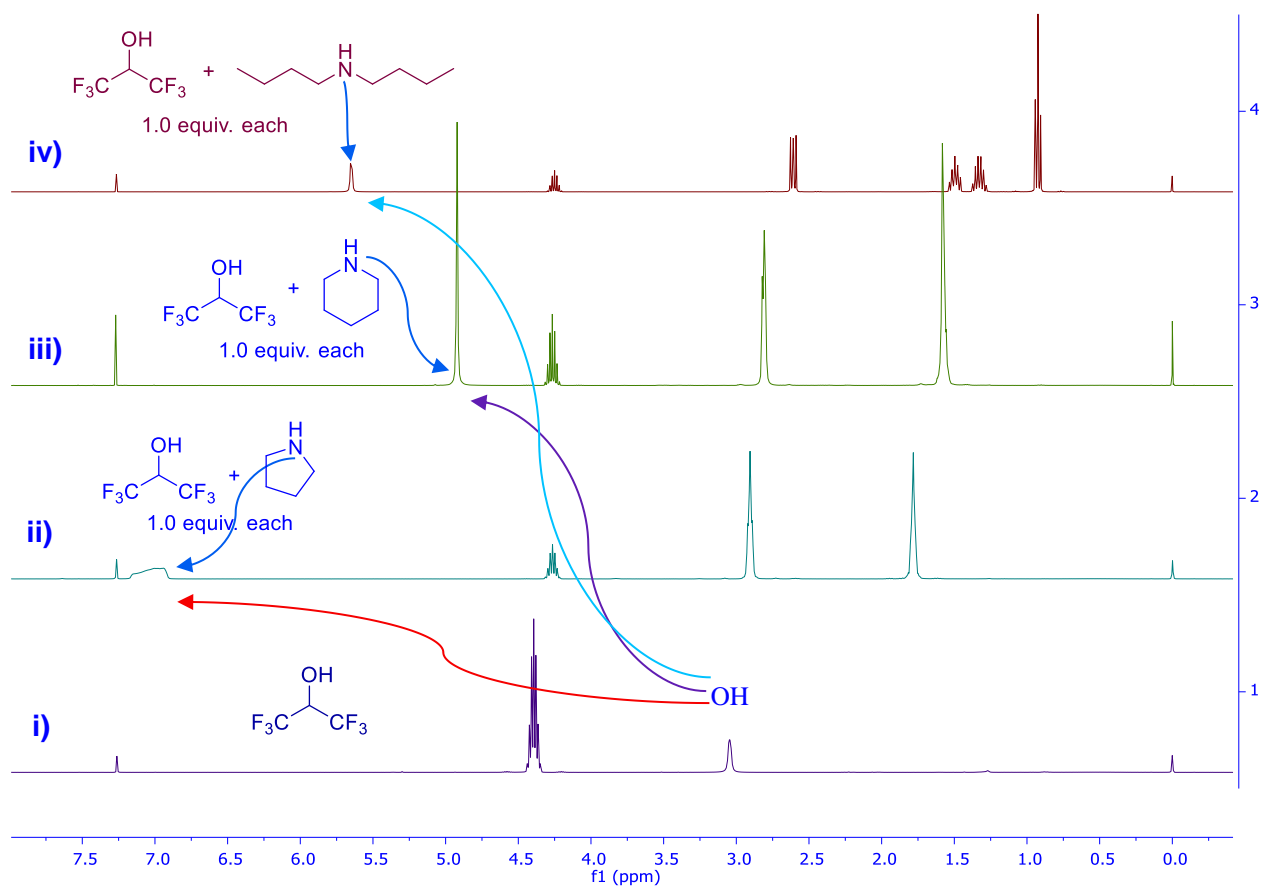

**Scheme S17:** <sup>1</sup>H-NMR of i) HFIP and mixtures of HFIP with different amine (ii) to (iv) in CDCl<sub>3</sub>

The shifting of OH and NH proton of HFIP and amine (scheme S17) towards downfield shift (deshielded) supporting the H-bonding between the basic amine moiety and the exceptionally good hydrogen bond donor HFIP.<sup>25</sup> This H-bonding interaction decrease the nucleophilicity of amine, that might be the reason associated with low detection of enamine in HFIP solvent (Scheme S9-S10). In other words, we can that this hydrogen bonding maintains the equilibrium between enamine formation and C-H activation step.

### Enamine formation under standard reaction condition in HFIP and CDCl<sub>3</sub> solvents

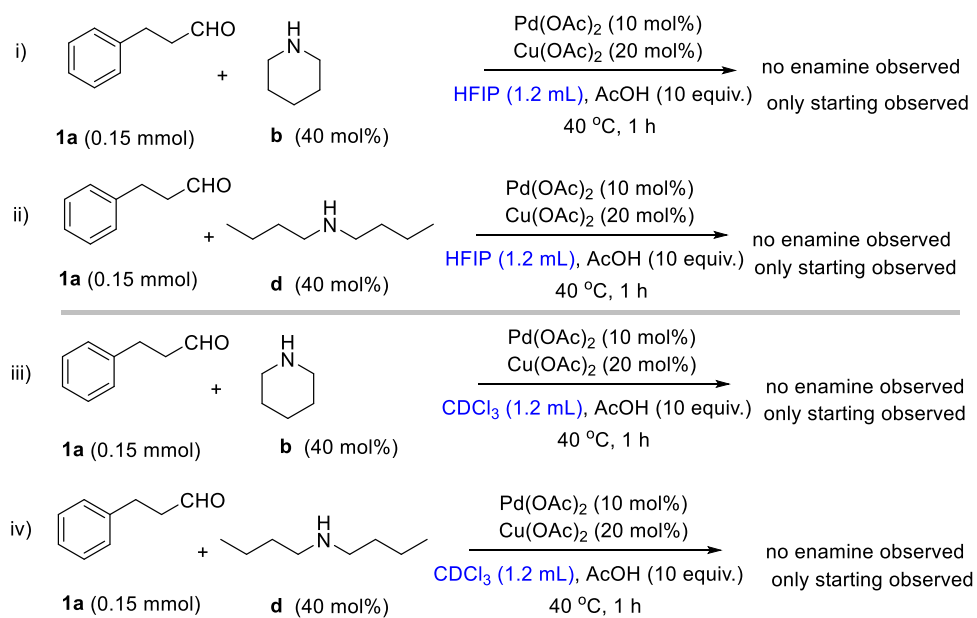

**Scheme S11:** Enamine formation of **1a** with different amine under various reaction condition

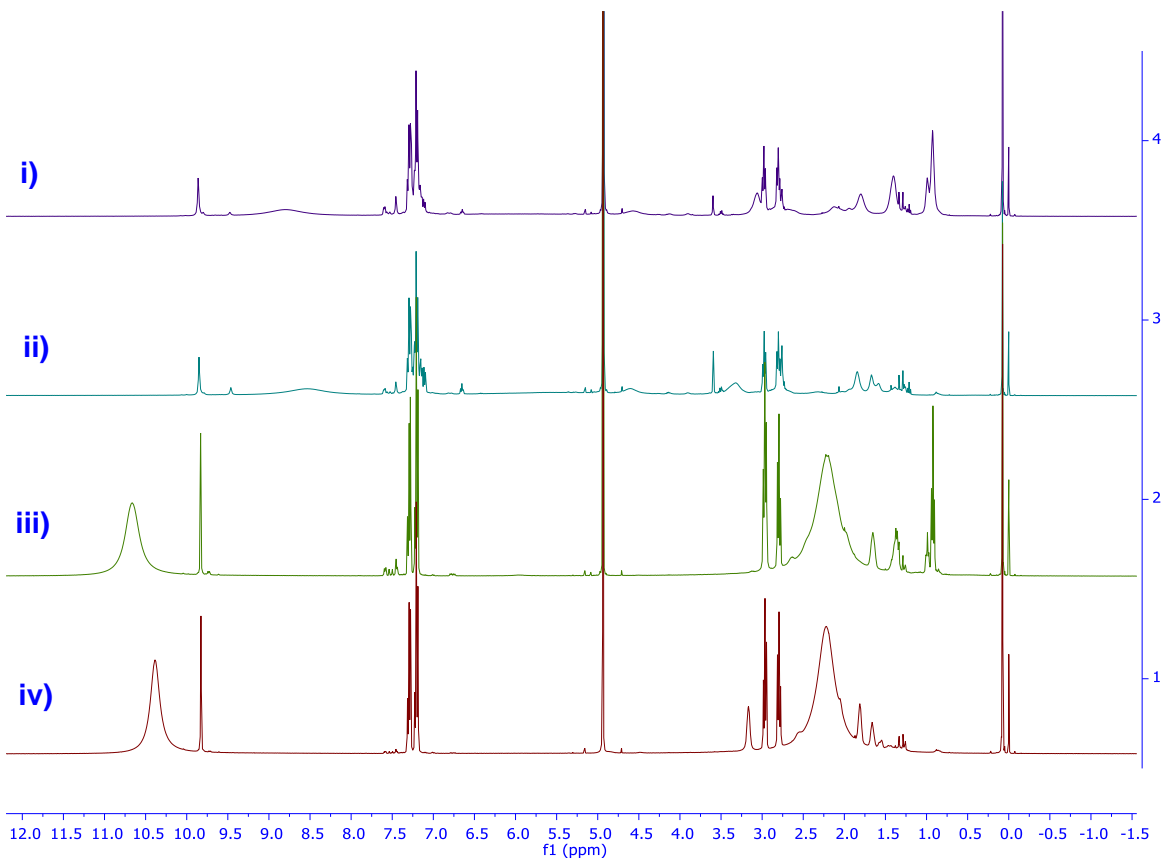

**Figure S18:** Crude <sup>1</sup>H NMR spectra of enamine formation of above reactions (i-iv)

No enamine formation has been detected under standard reaction condition in HFIP and  $\text{CDCl}_3$  solvent (Scheme S11, Figure 18) that mean enamine formation is highly reversible in nature.

### Intermolecular competition experiment between 3-phenyl propanal (**1a**), cyclic amine and acyclic amine:

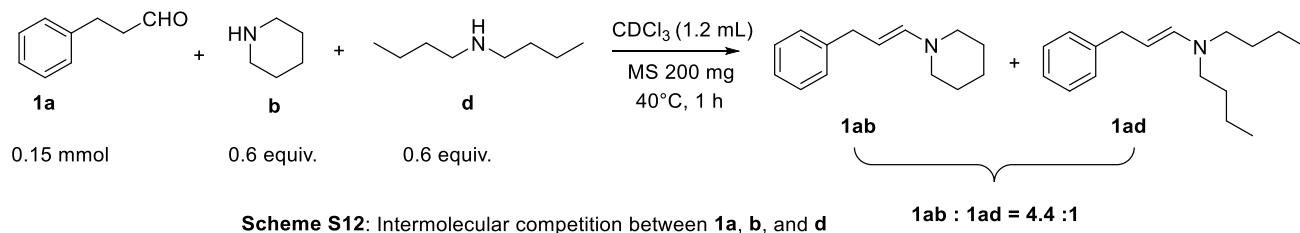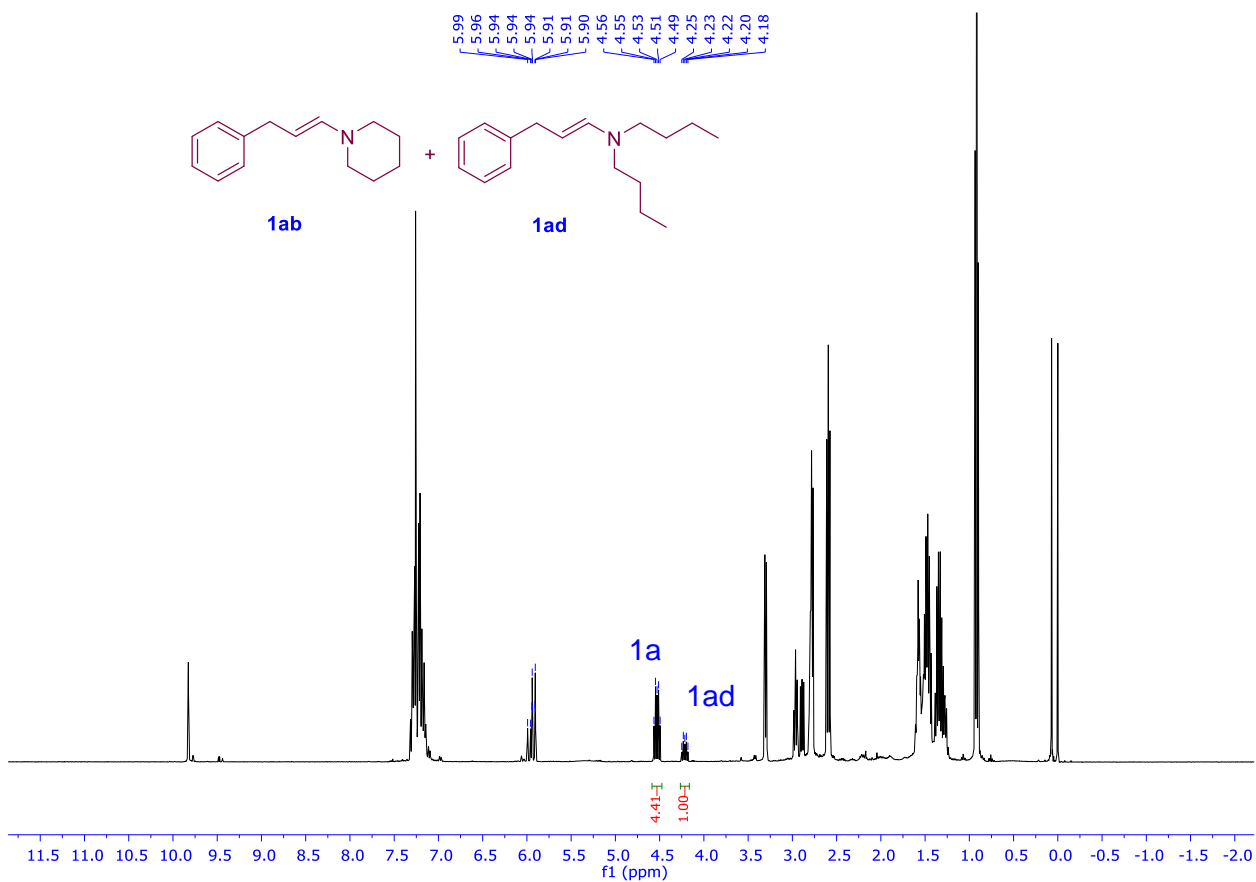

**Figure S19:** Crude  $^1\text{H}$  NMR spectra of reaction **1a**, **b** and **d**

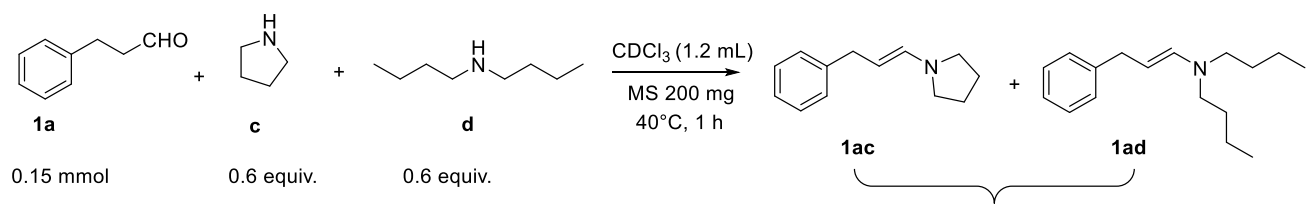

**Scheme S13:** Intermolecular competition between **1a**, **c**, and **d**

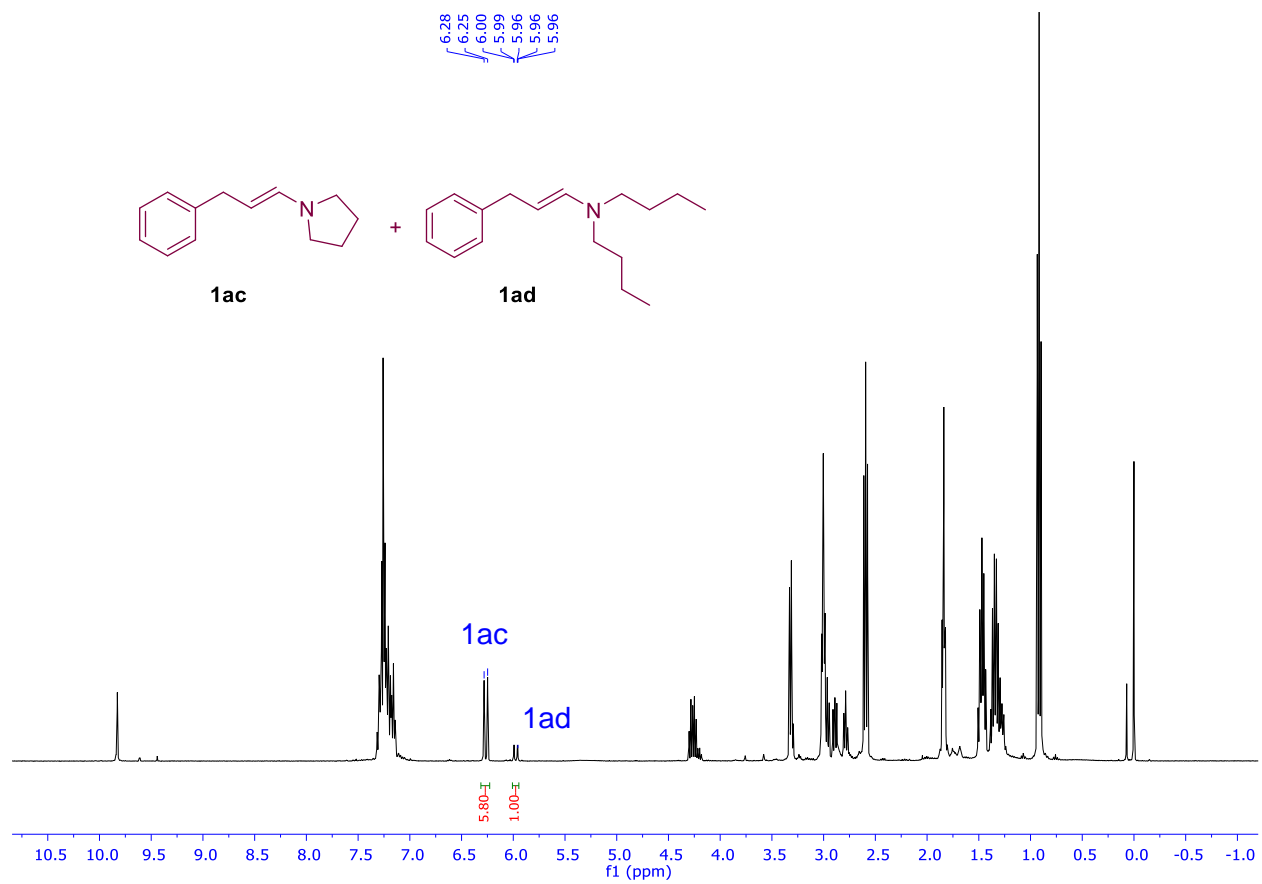

**Figure S20:** Crude  $^1\text{H}$  NMR spectra of reaction **1a**, **c** and **d**

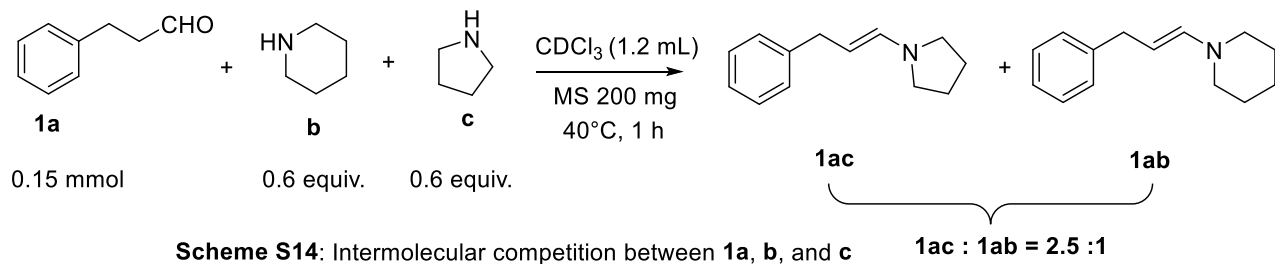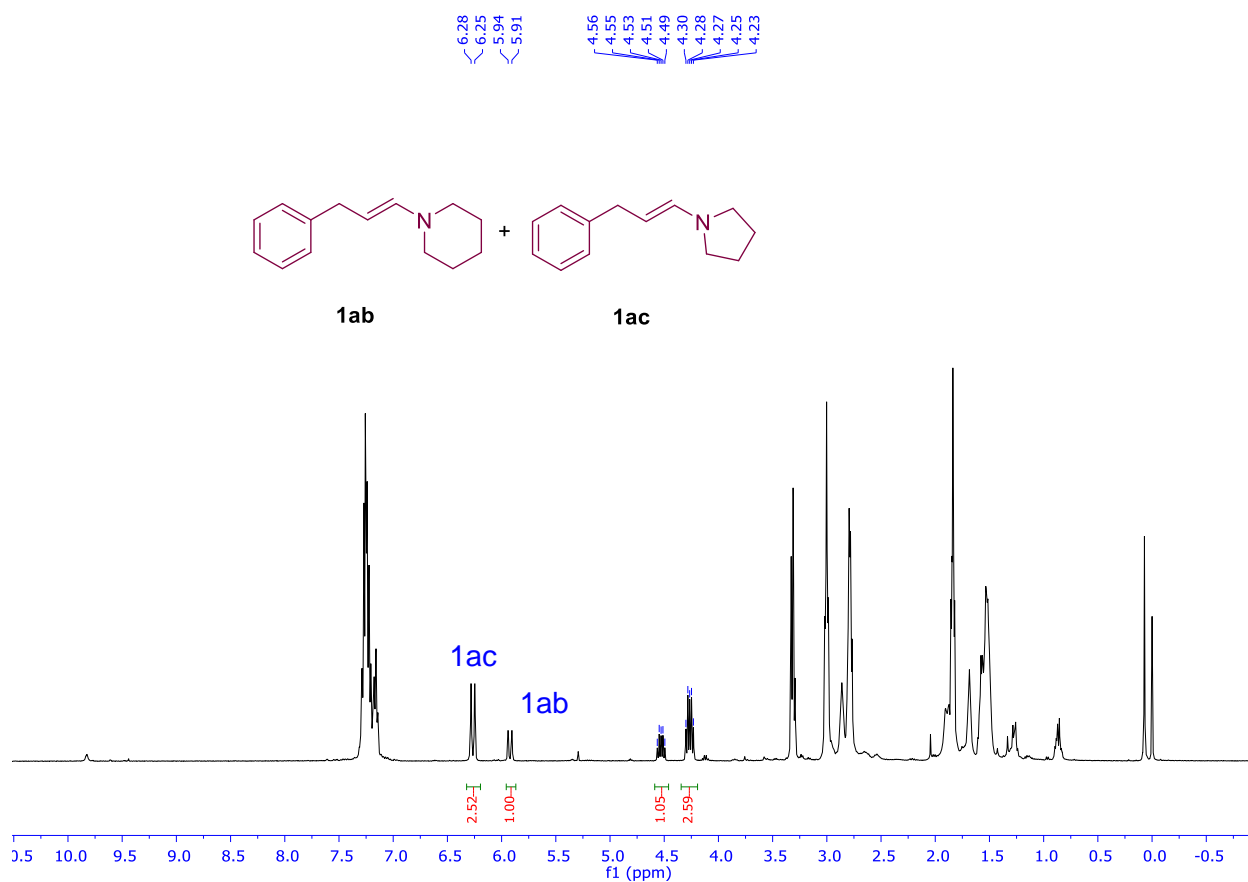

From the above competitive experiments (Scheme S12-S14), it can be concluded that cyclic amine (A7, A8) are more nucleophilic in nature and showed more enamine formation compared to acyclic amine (A) likely owing the less steric hindrance character.<sup>26</sup>

### Amine-enamine exchange experiments:

Amine-enamine exchange experiment was performed according to literature report.<sup>26</sup> The enamine (**1ac**, **1ab** and **1ad**) was synthesized according to above method **g** (Scheme **S5a**) and used as such for amine-enamine experiments.

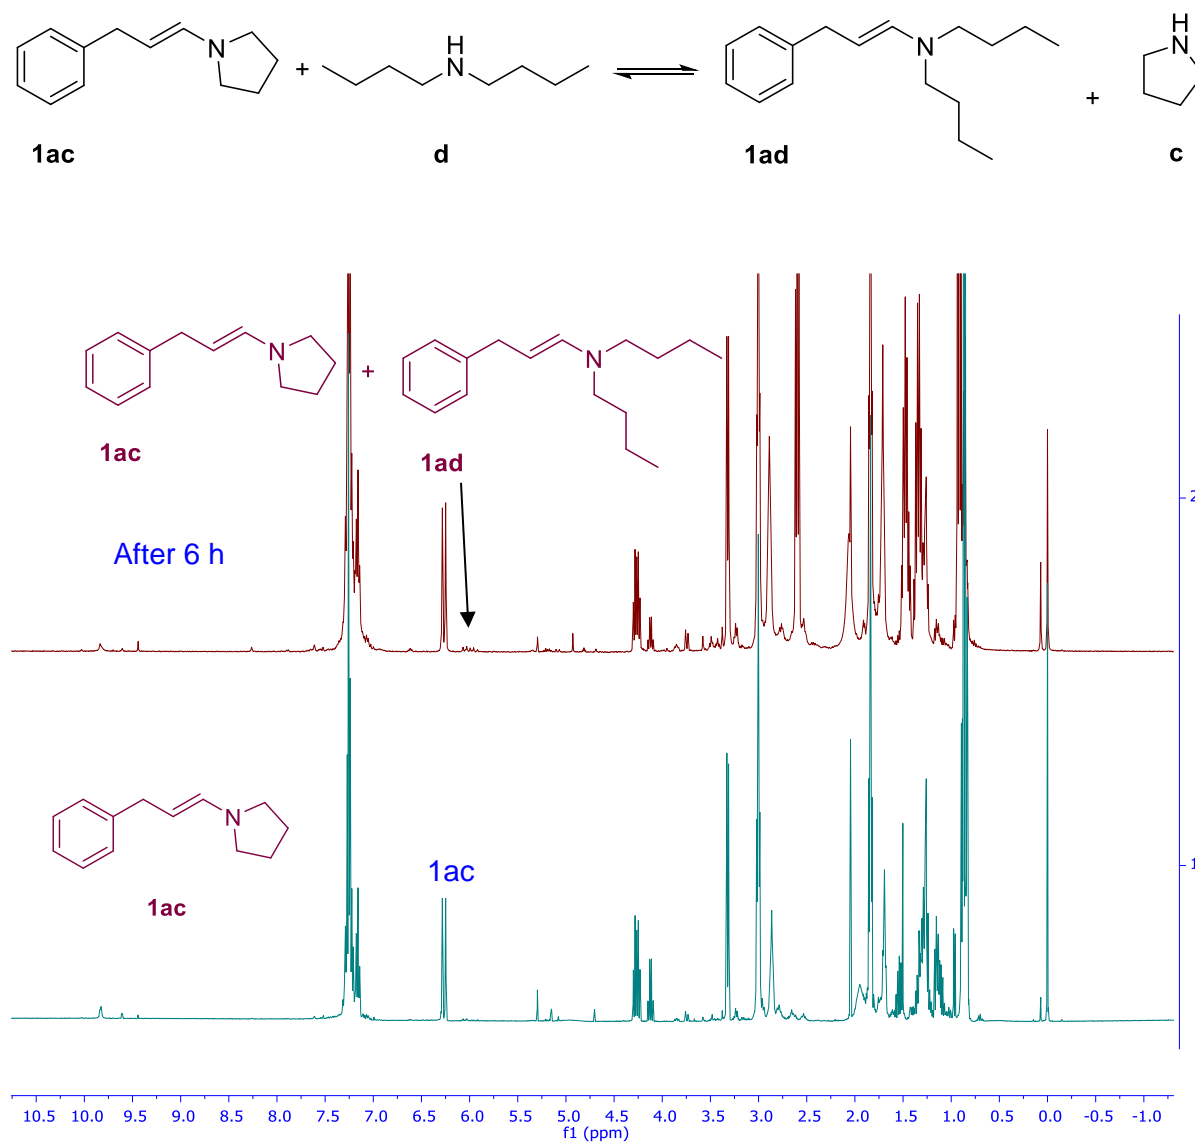

**Figure S22:** Crude <sup>1</sup>H NMR spectra of Amine-enamine exchange reaction with **1ac** and **d** after 6h

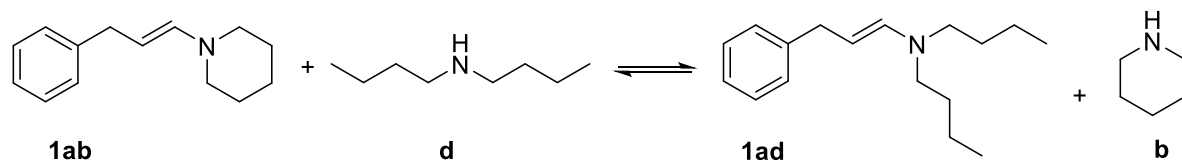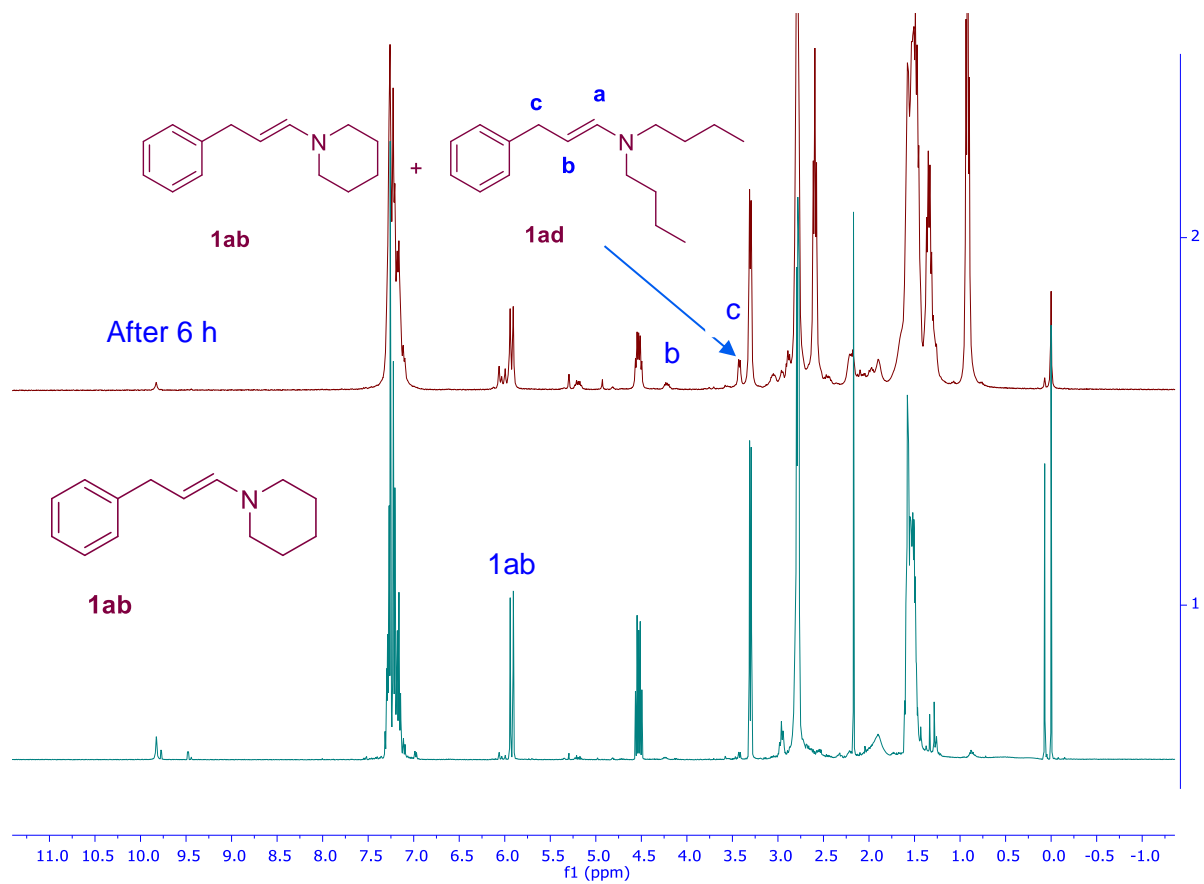

**Figure S23:** Crude  $^1\text{H}$  NMR spectra of Amine-enamine exchange reaction with **1ab** and **d** after 6h

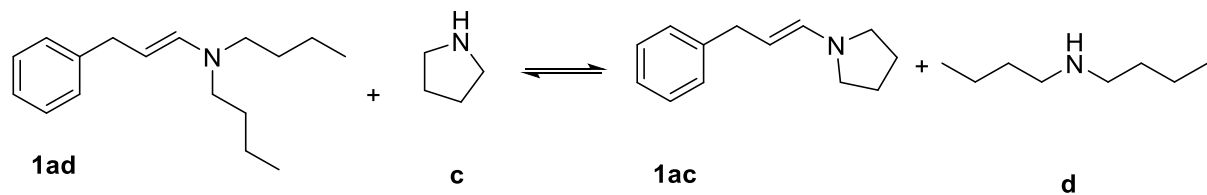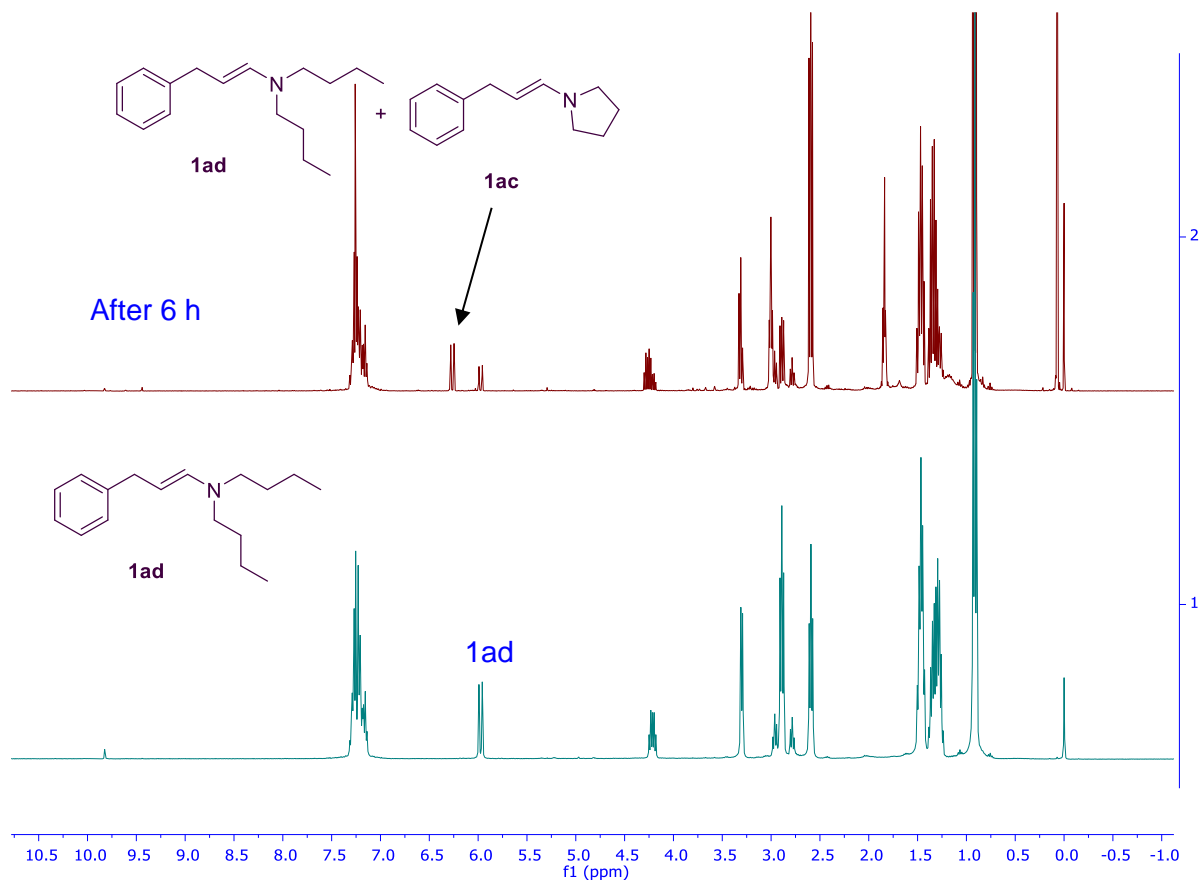

**Figure S24:** Crude  $^1\text{H}$  NMR spectra of Amine-enamine exchange reaction with **1ad** and **c** after 6h

The above results of amine-enamine exchange experiments compliance with the previous report<sup>26</sup>, where cyclic amine found to be more stable compare to acyclic amine. Overall cyclic amine (A7 and A8) are more nucleophilic and gave more stable enamine compare to acyclic amine (A) which effect the equilibrium between amine and enamine and might not give desired product (Table 1, entry 16).



## General depiction regarding effect of steric hindrance on olefin migratory insertion step

### Effect of steric hindrance in C-H insertion step

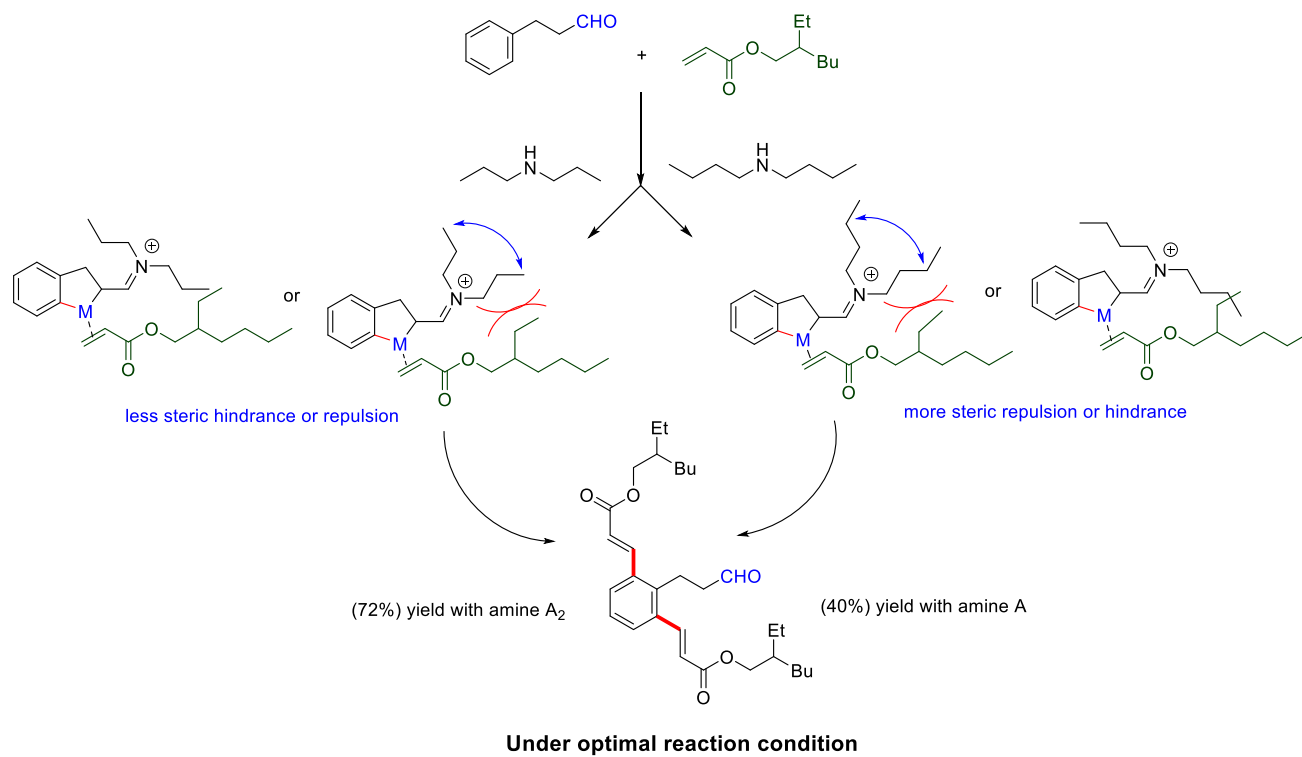

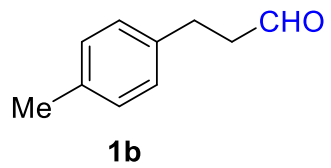

9.782

7.147  
7.132  
7.126  
7.114  
7.094

2.914  
2.896  
2.877  
2.775  
2.773  
2.772  
2.770  
2.754  
2.738  
2.735  
2.732  
2.290  
2.078  
2.073  
2.067  
2.062  
2.056

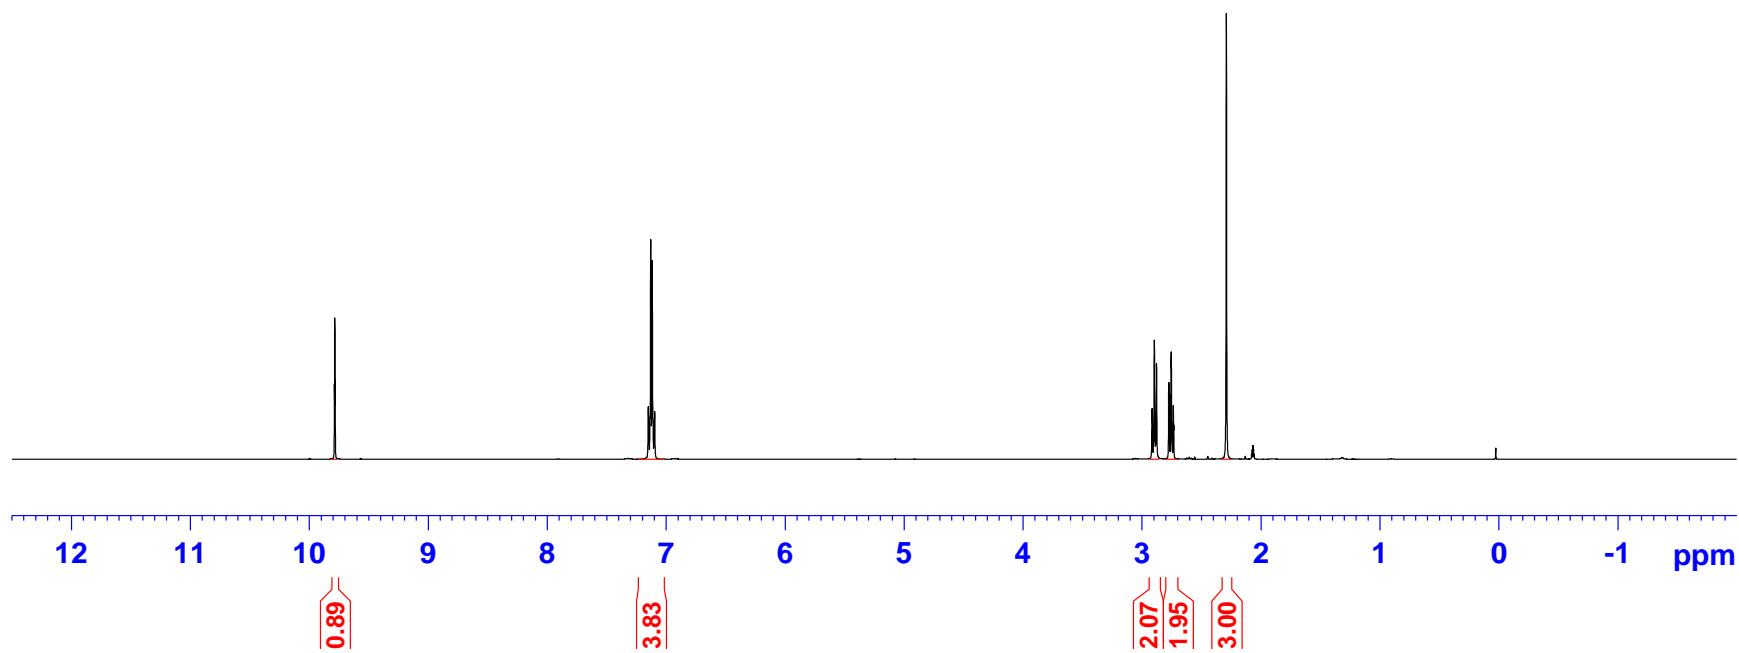

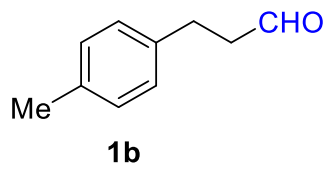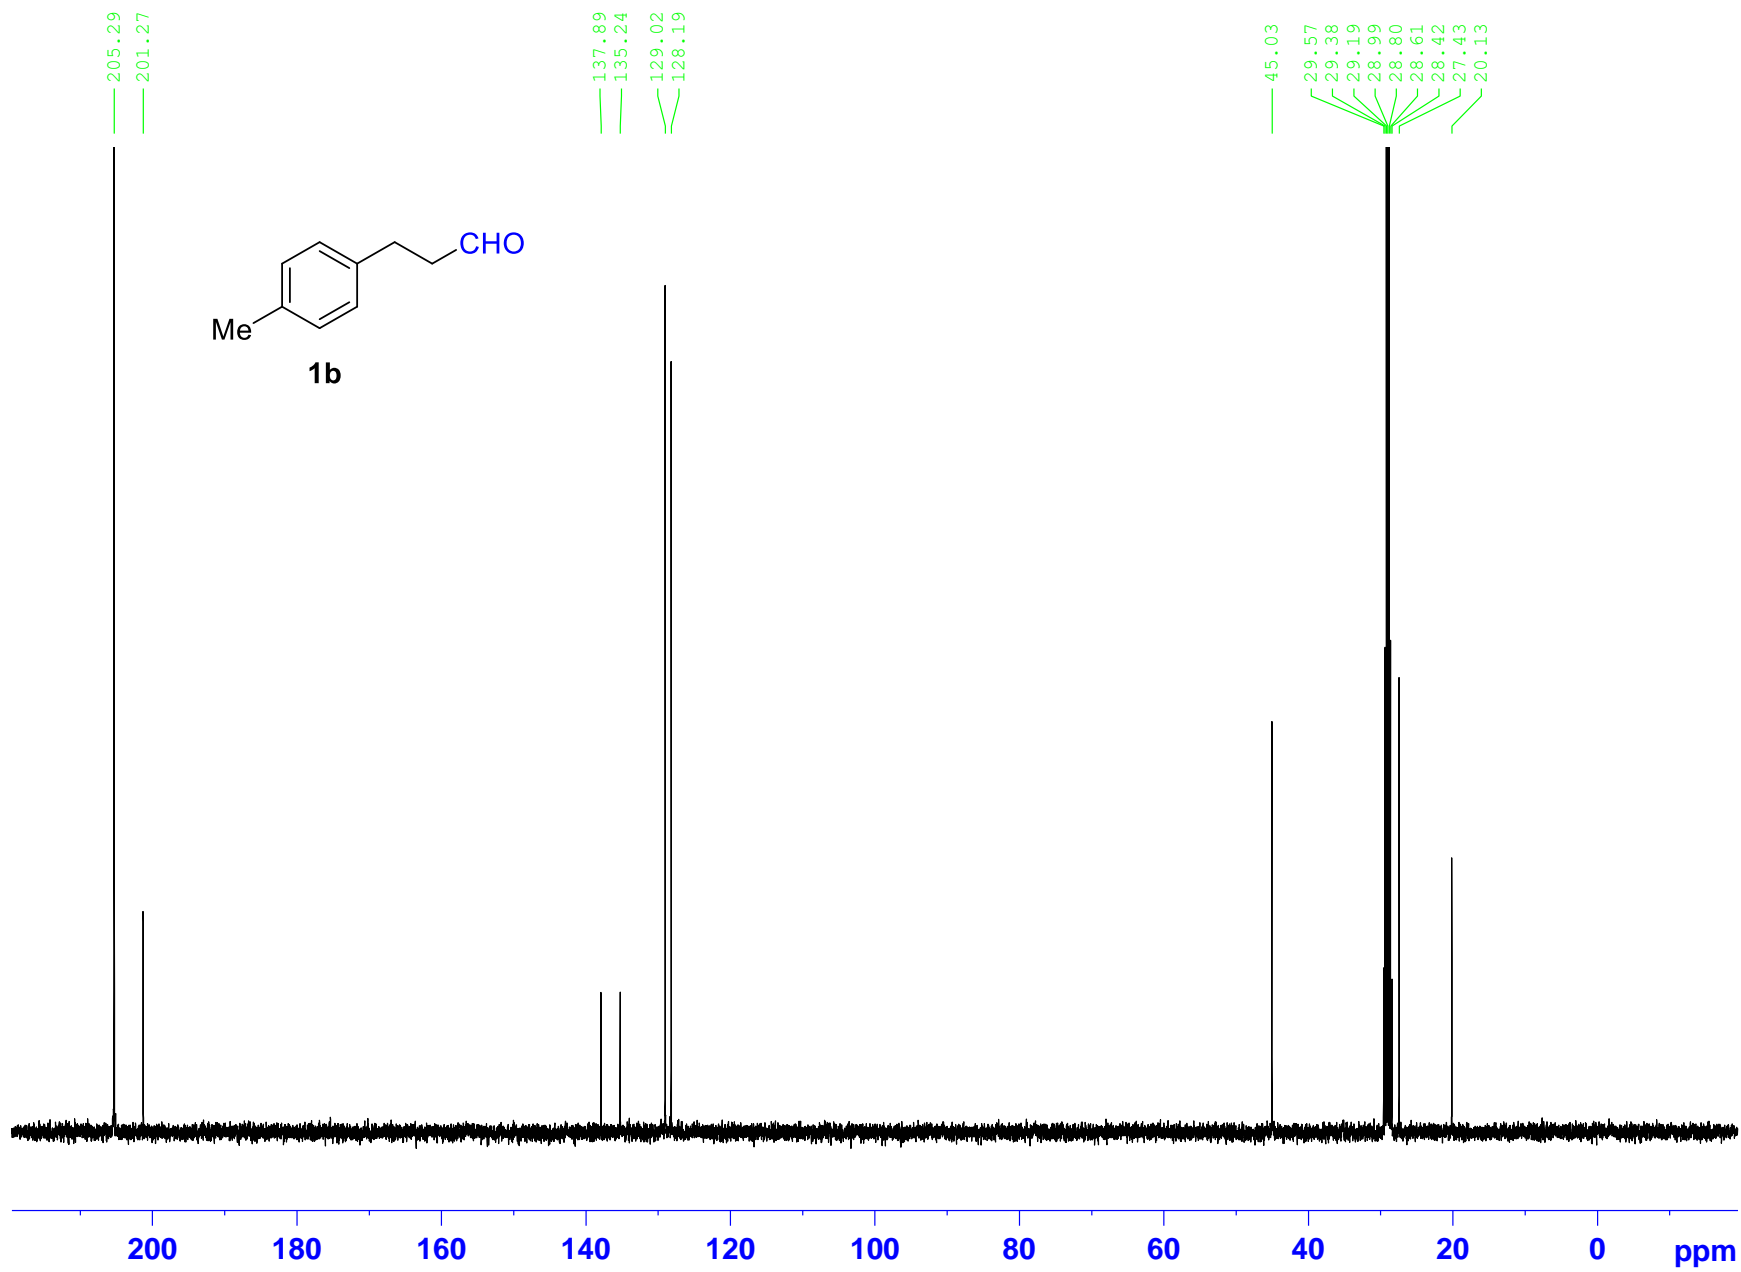

S115

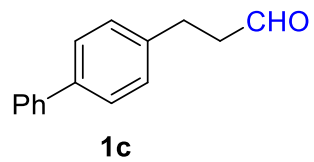

9.884

7.614  
7.596  
7.571  
7.551  
7.483  
7.465  
7.445  
7.386  
7.368  
7.349  
7.315  
7.294  
7.287

3.057  
3.039  
3.020  
2.878  
2.860  
2.841

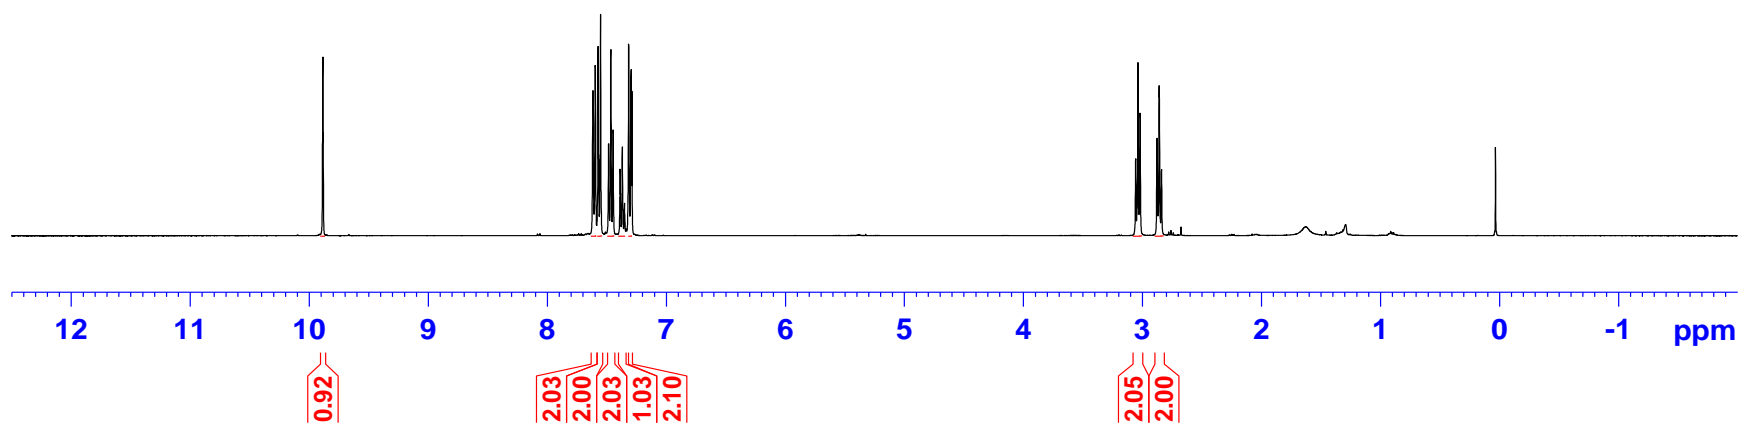

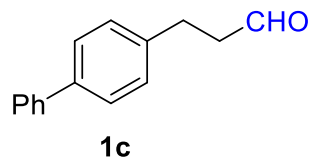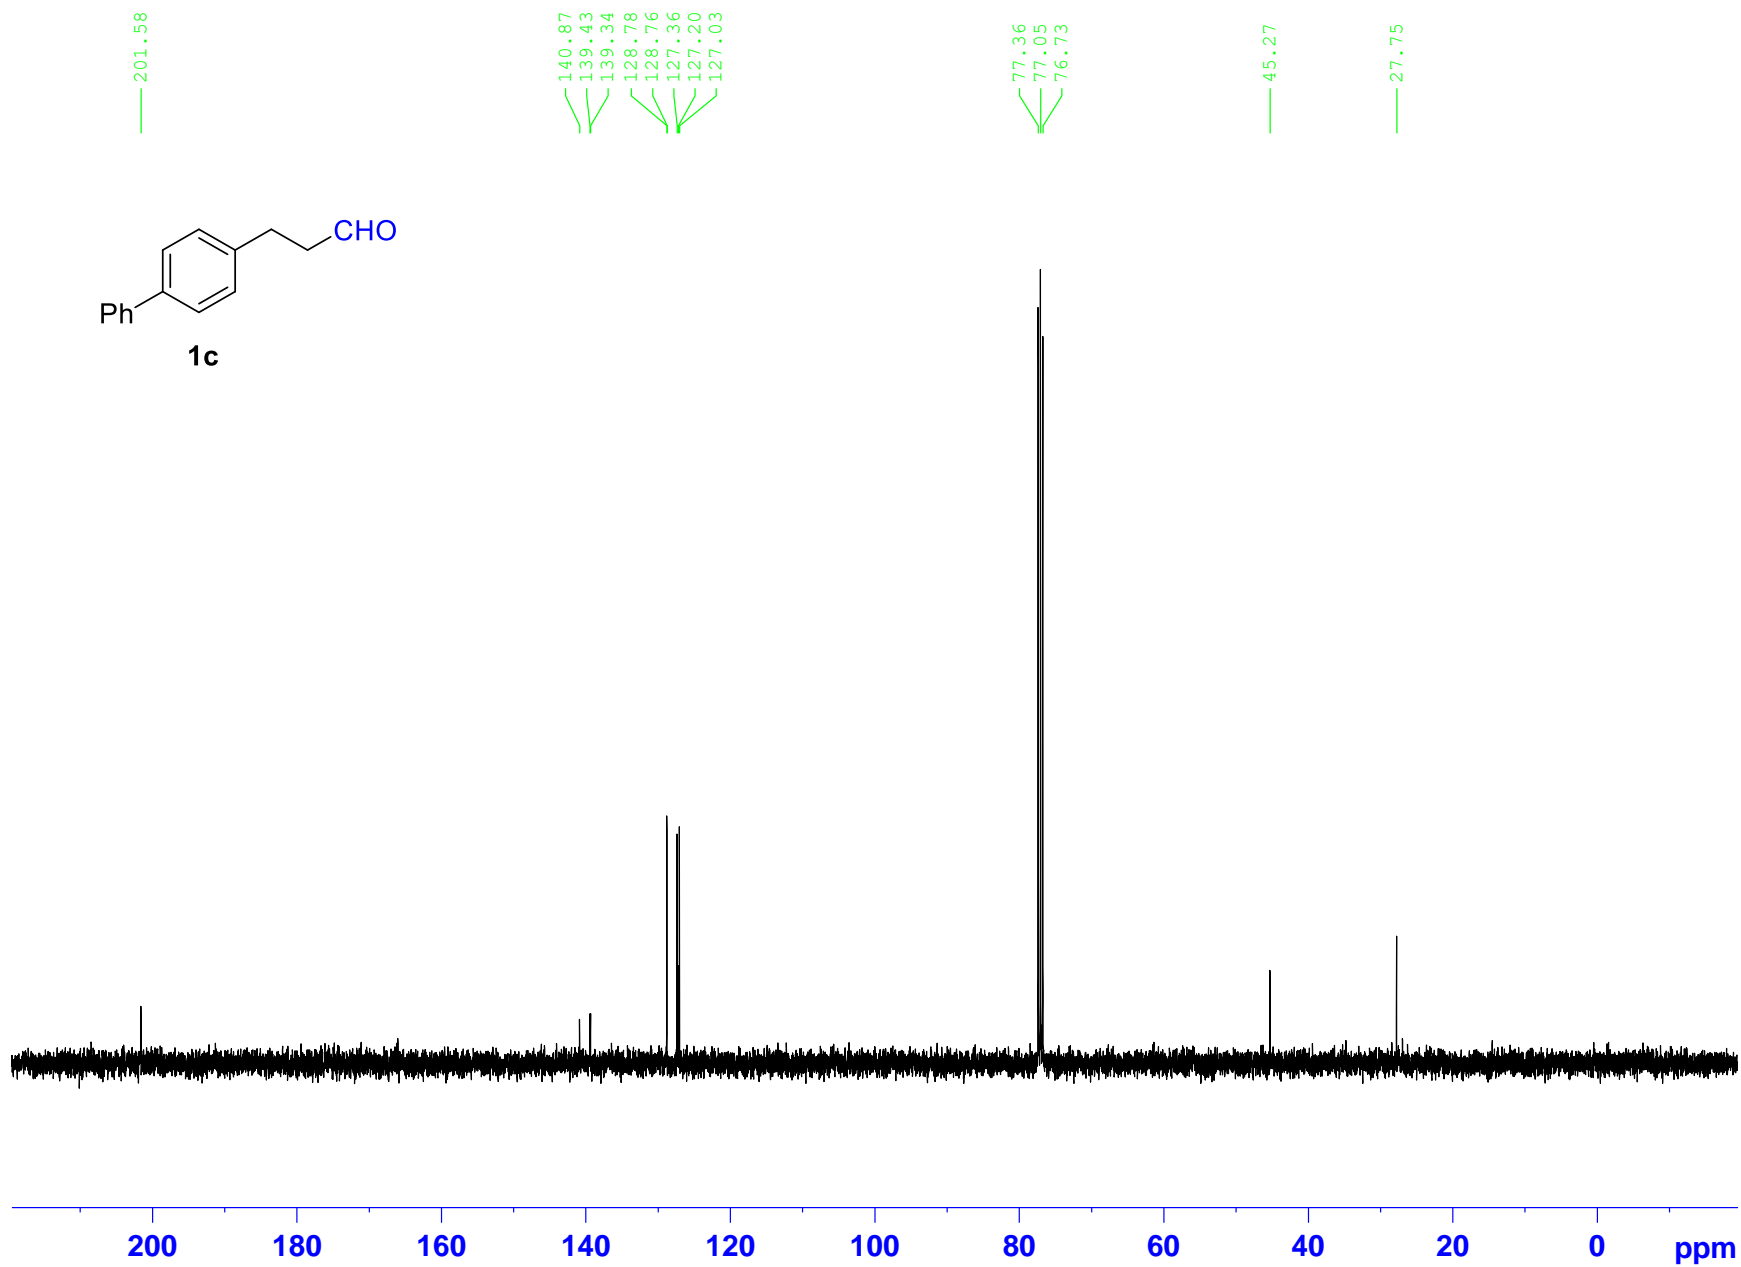

S117

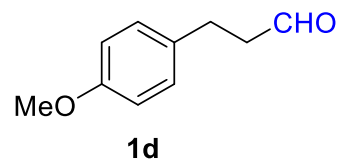

9.774

7.246  
7.106  
7.085  
6.833  
6.811

3.760  
2.900  
2.881  
2.863  
2.737  
2.735  
2.718  
2.699

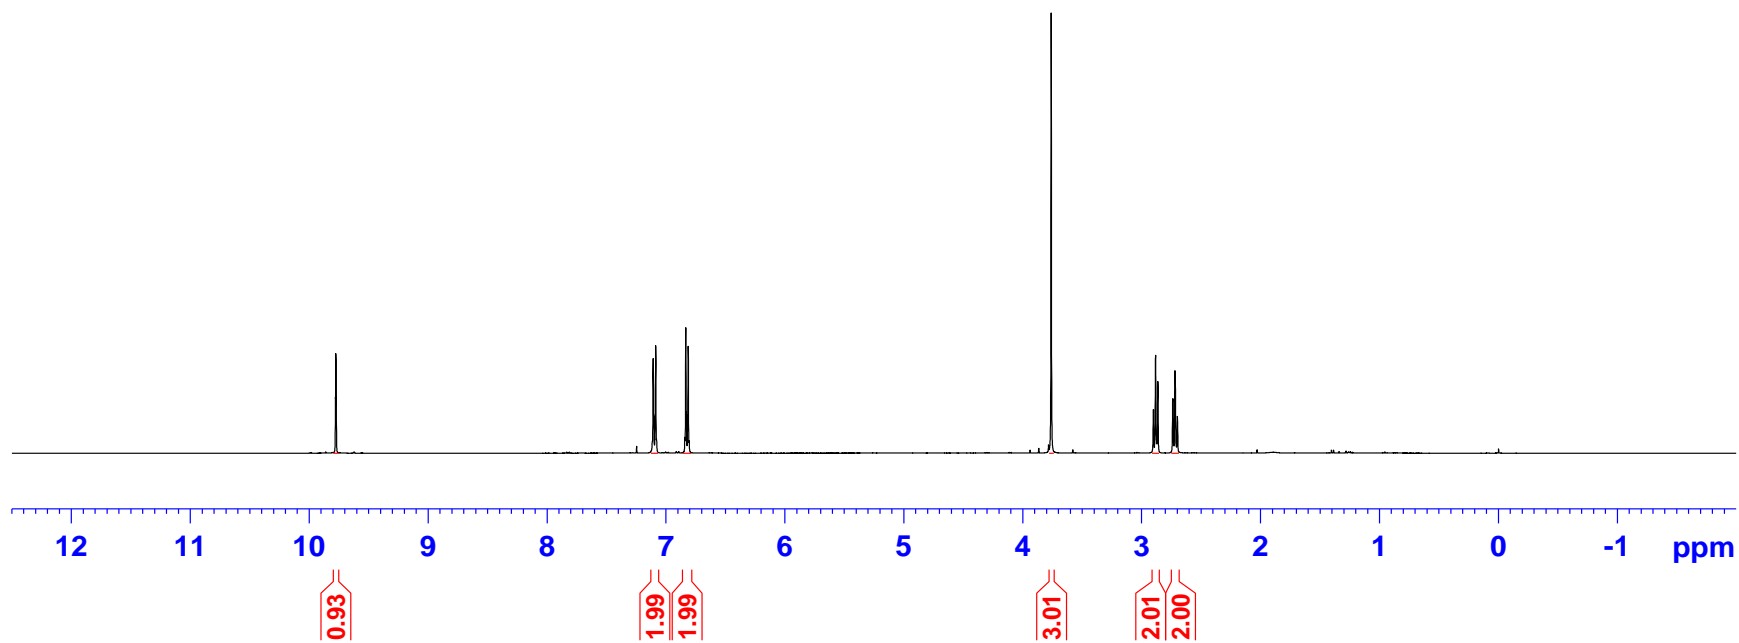

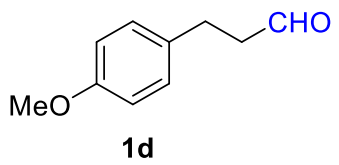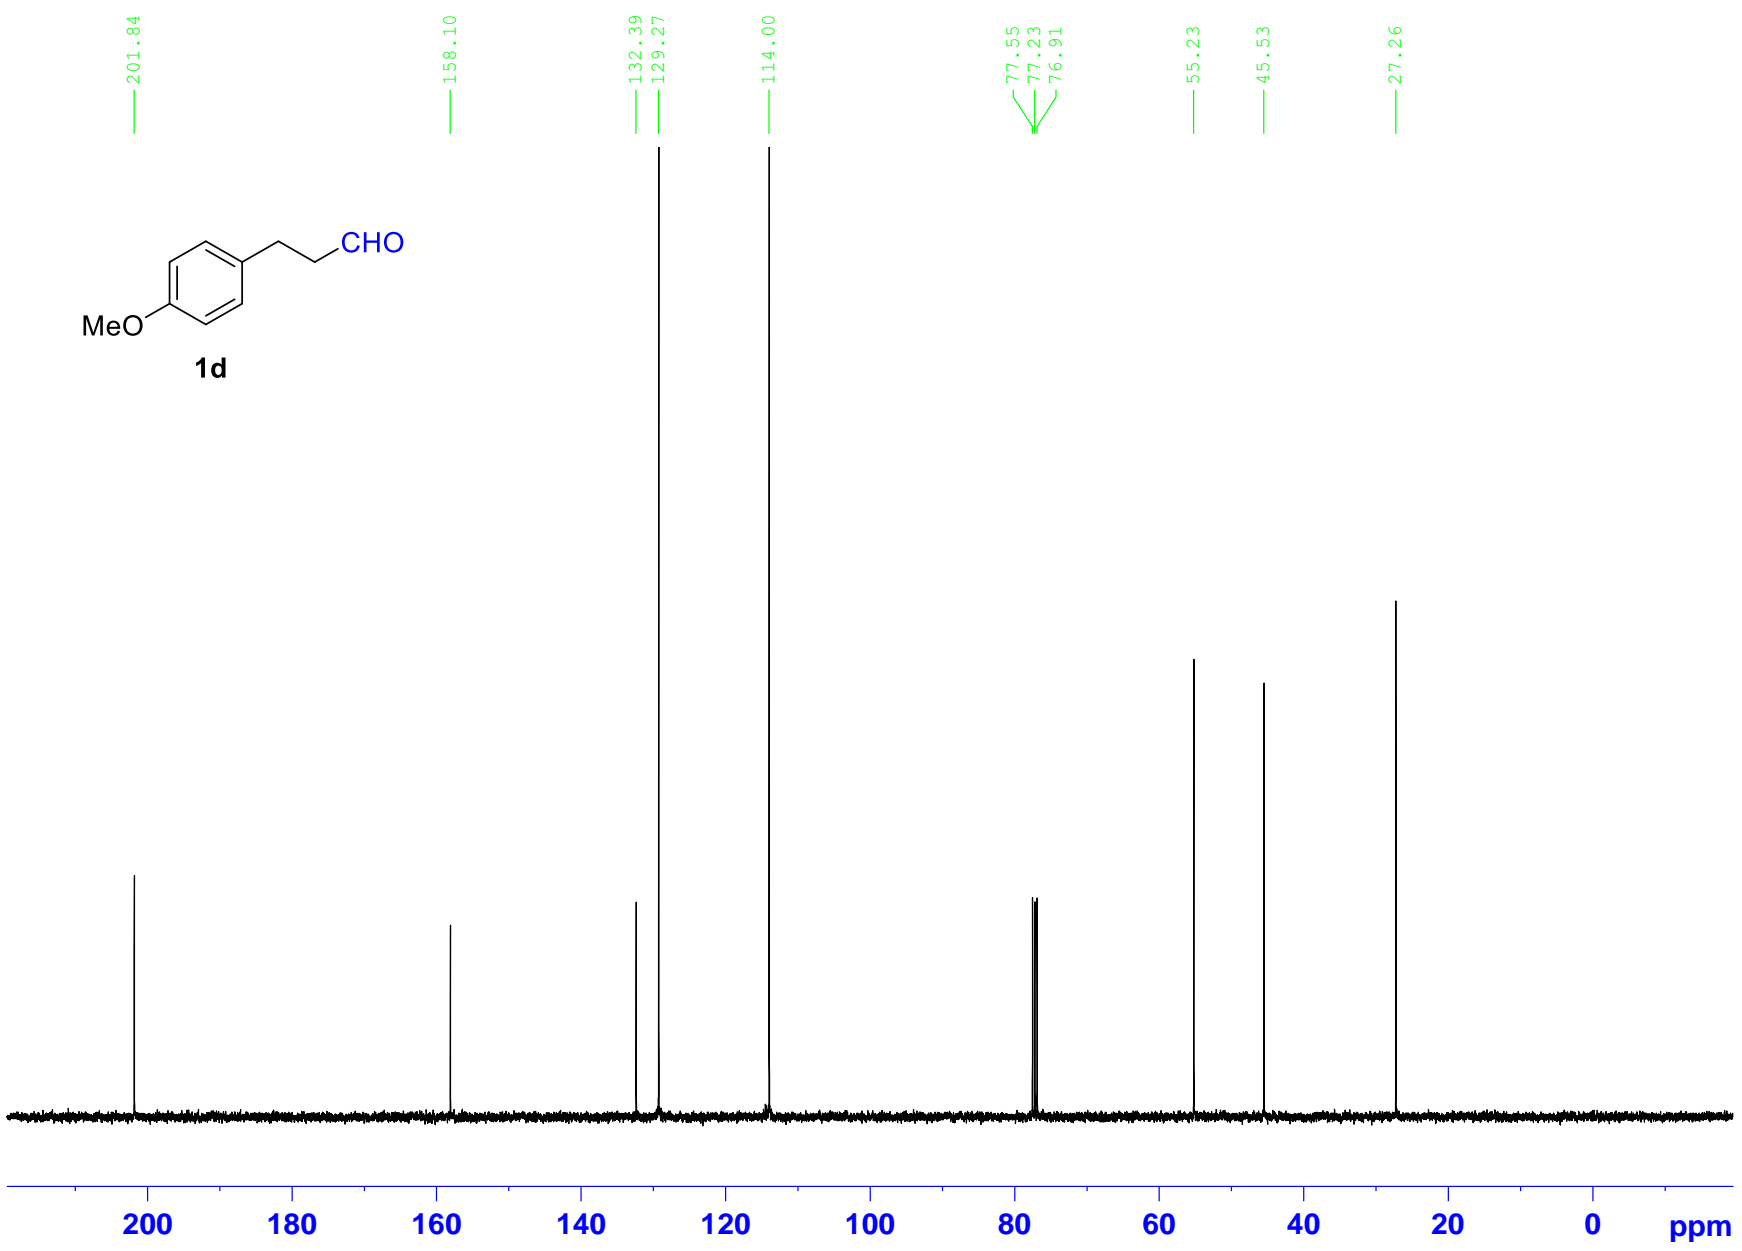

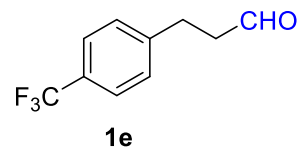

— 9.798

7.637  
7.616  
7.495  
7.475

3.046  
3.027  
3.009  
2.888  
2.886  
2.852  
2.849  
2.847  
2.063  
2.057  
2.052  
2.046  
2.041

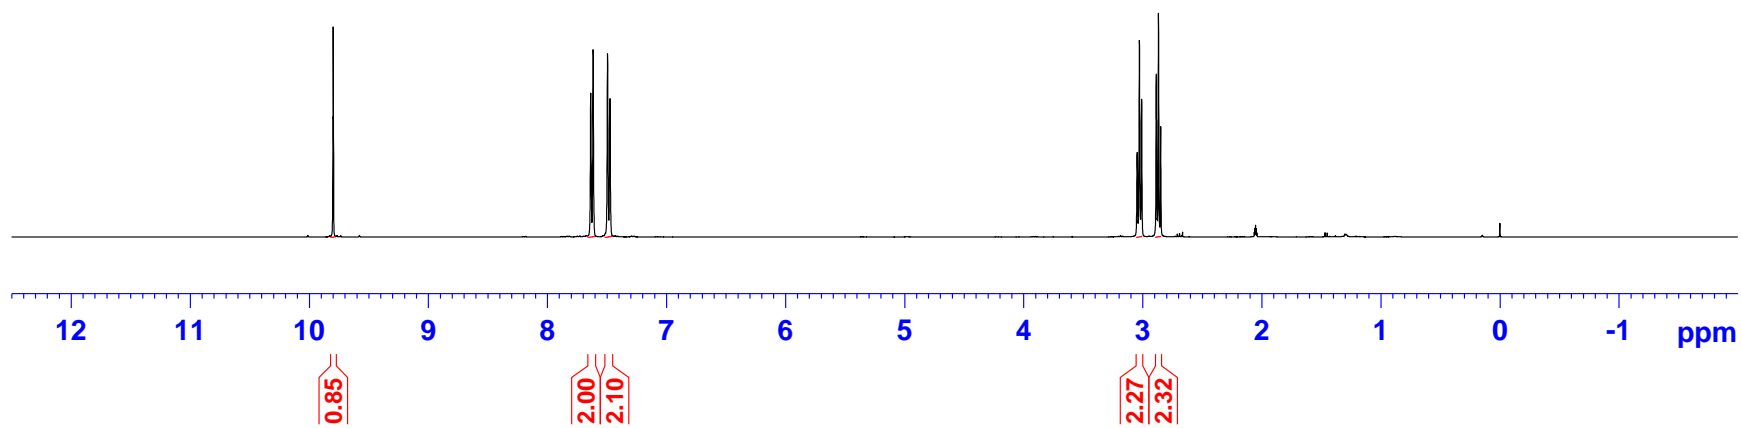



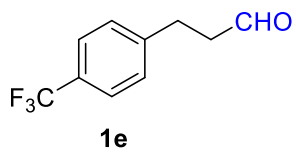

205.29  
200.68

145.98  
129.09  
127.95  
127.63  
125.96  
125.24  
125.20  
125.17  
125.13  
123.27

44.35  
29.52  
29.33  
29.13  
28.94  
28.75  
28.56  
28.36  
27.52

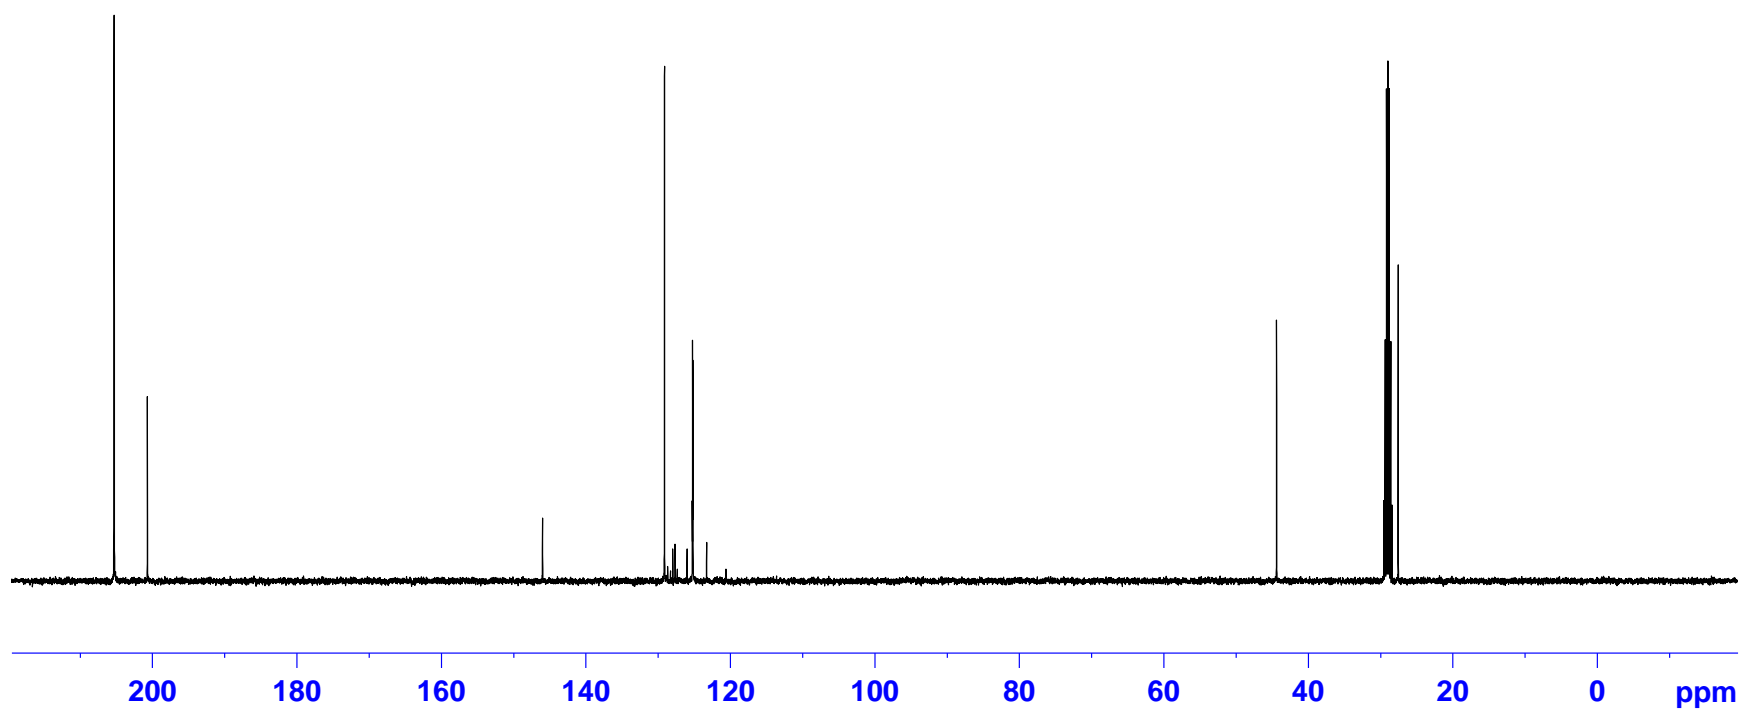

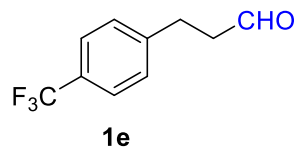

— -62.810

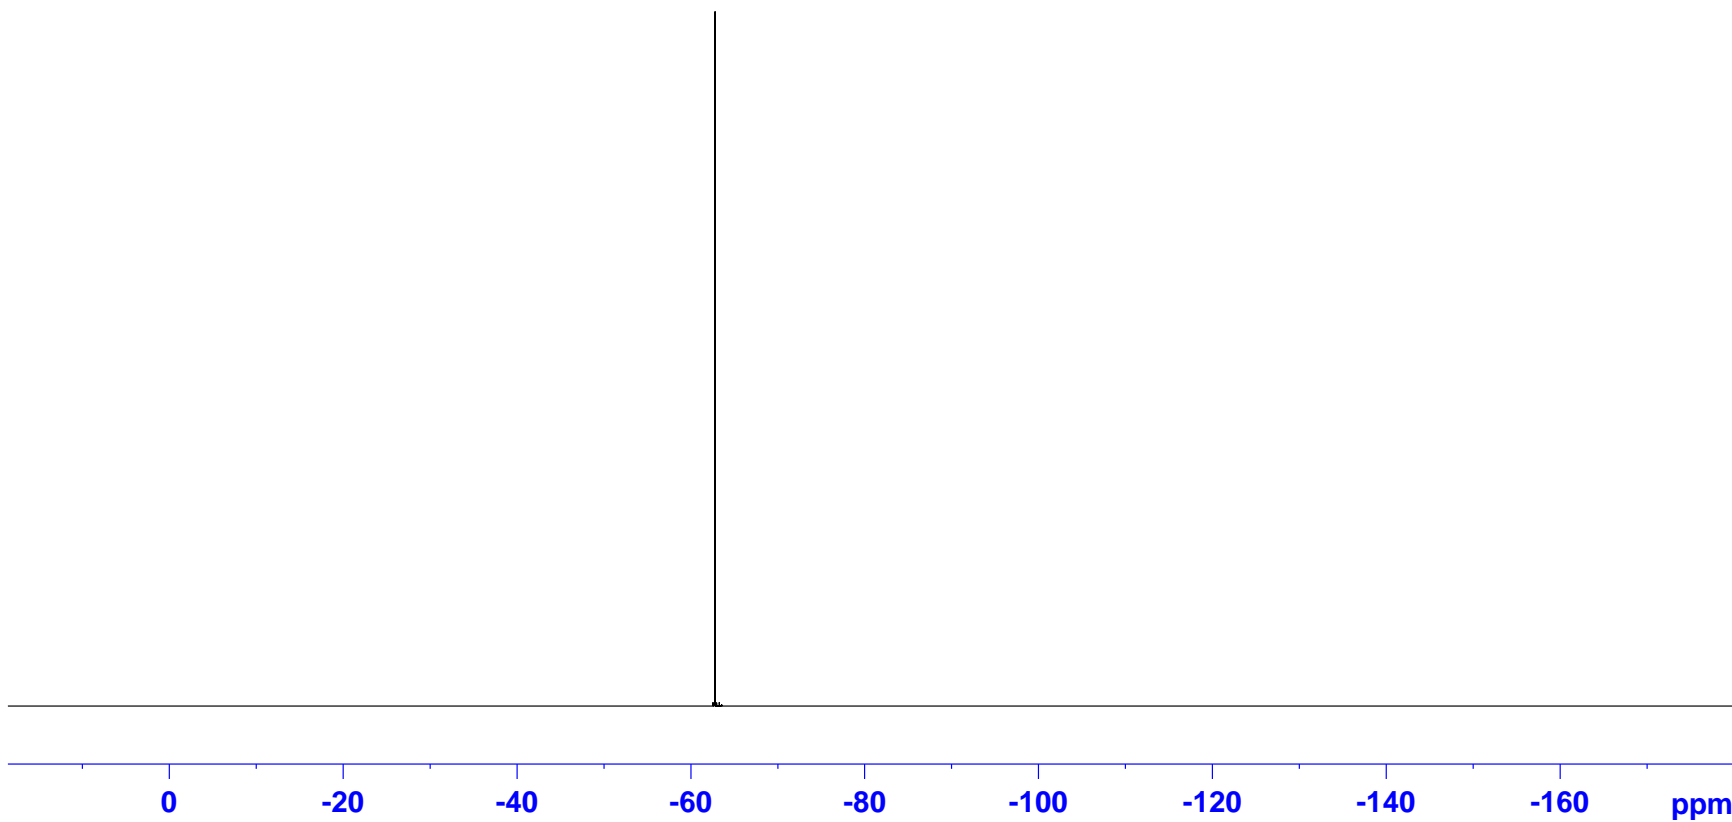

S122

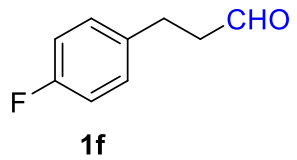

9.771

7.297  
7.290  
7.285  
7.276  
7.268  
7.260  
7.255  
7.247  
7.056  
7.034  
7.012

2.935  
2.917  
2.898  
2.798  
2.779  
2.763  
2.761  
2.758  
2.061  
2.055  
2.050  
2.045  
2.039

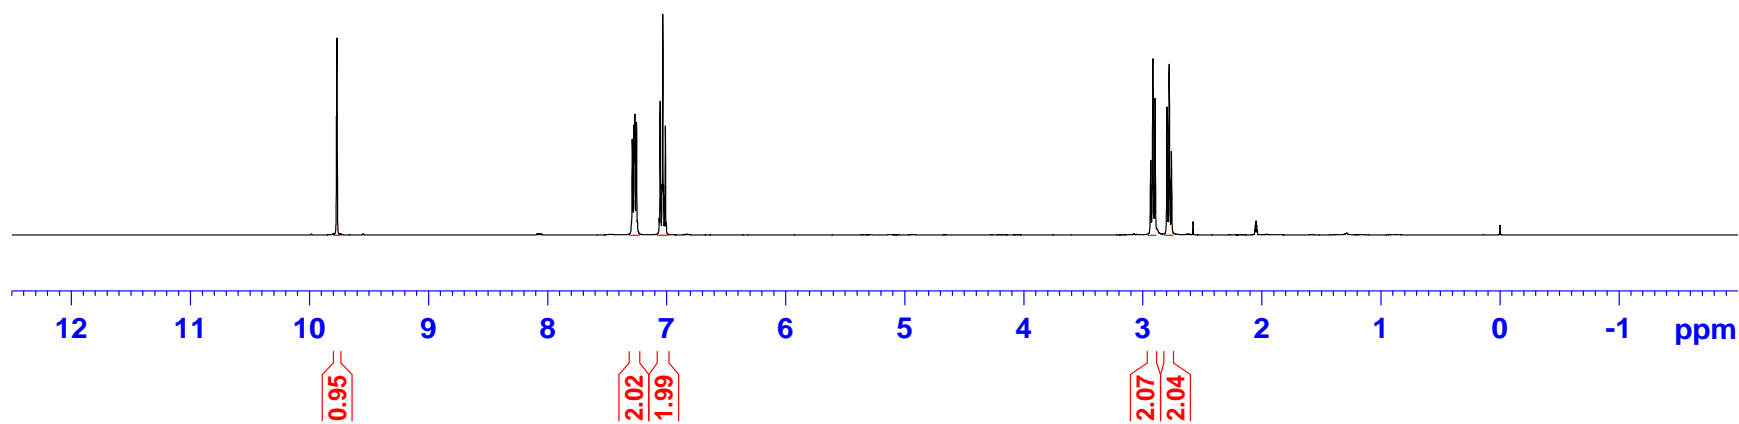

205.35  
201.05

162.53  
160.12

137.10  
137.06  
130.08  
130.00

115.04  
114.83

44.96  
29.57  
29.38  
29.18  
28.99  
28.80  
28.61  
28.41  
26.96

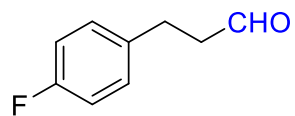

1f

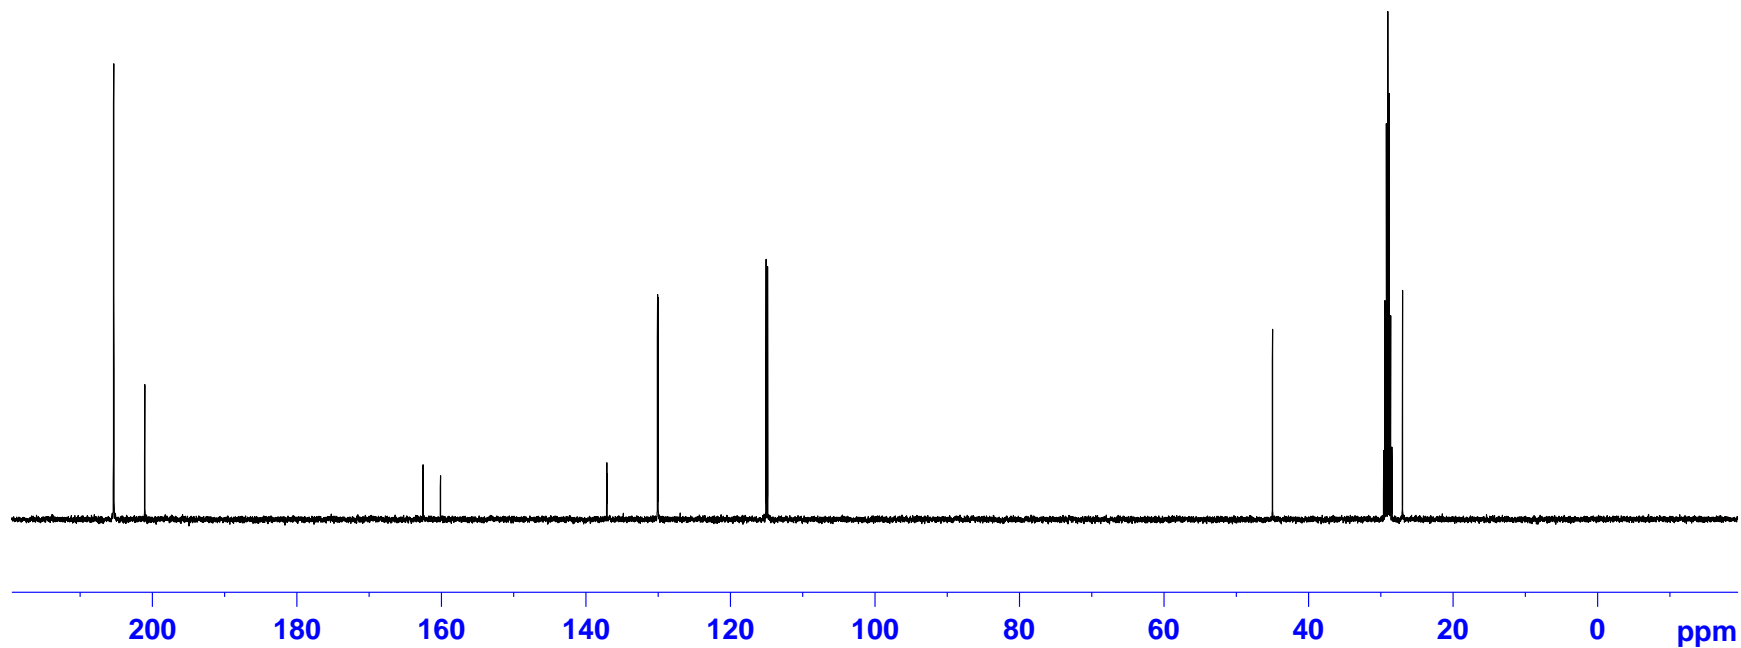

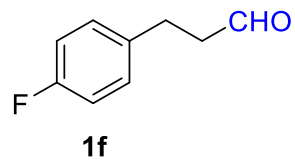

— -118.840

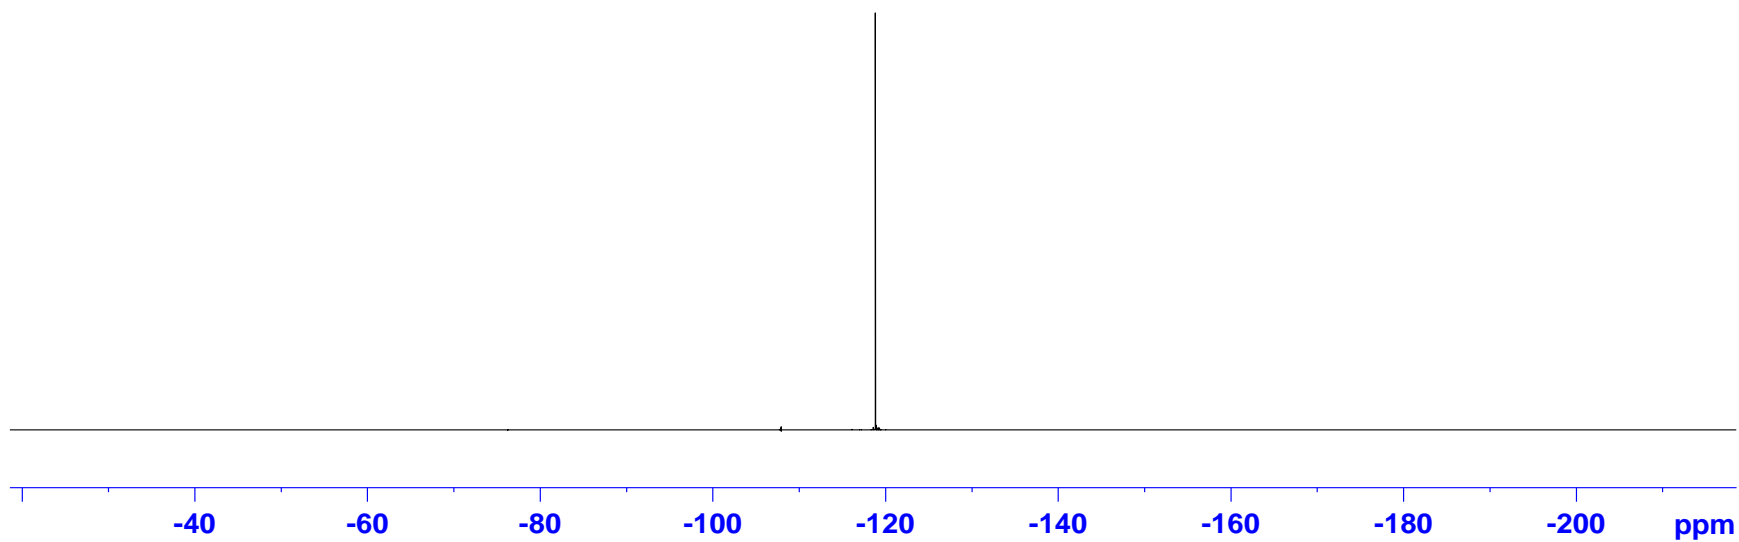

S125

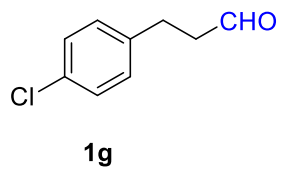

— 9.774

7.250  
7.229  
7.129  
7.108

2.923  
2.904  
2.886  
2.767  
2.748  
2.729

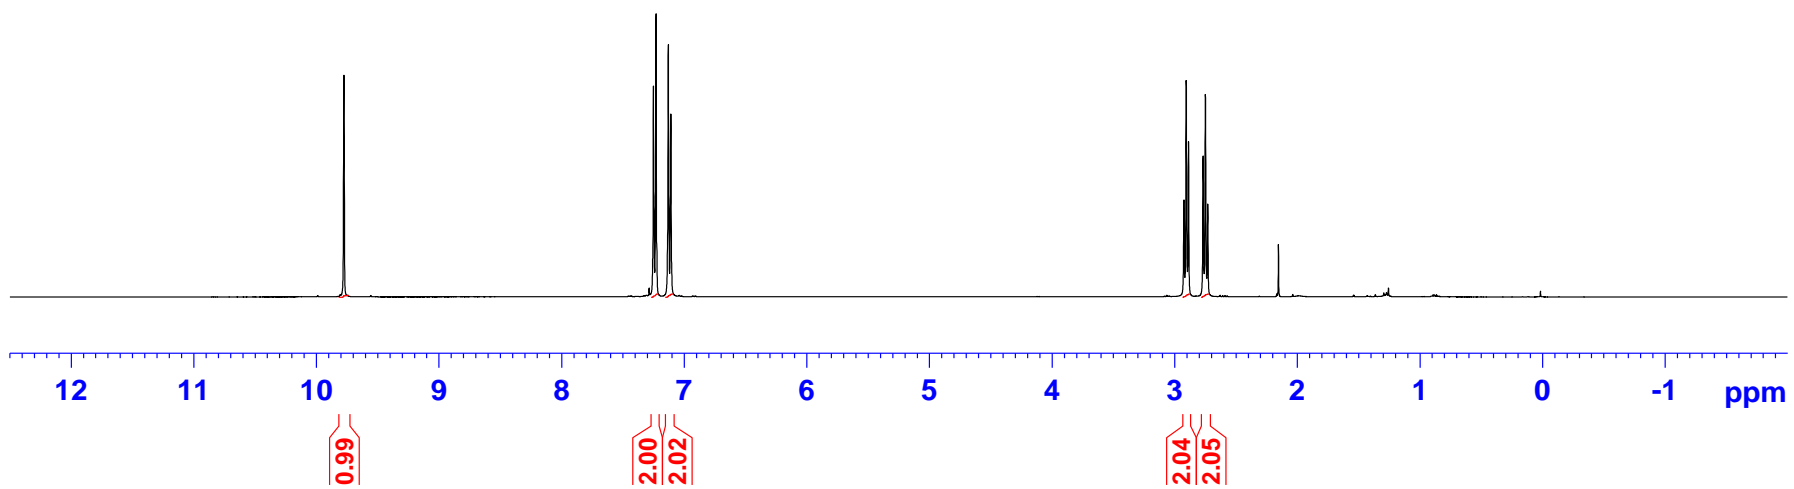

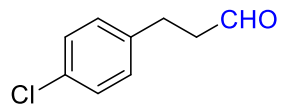

**1g**

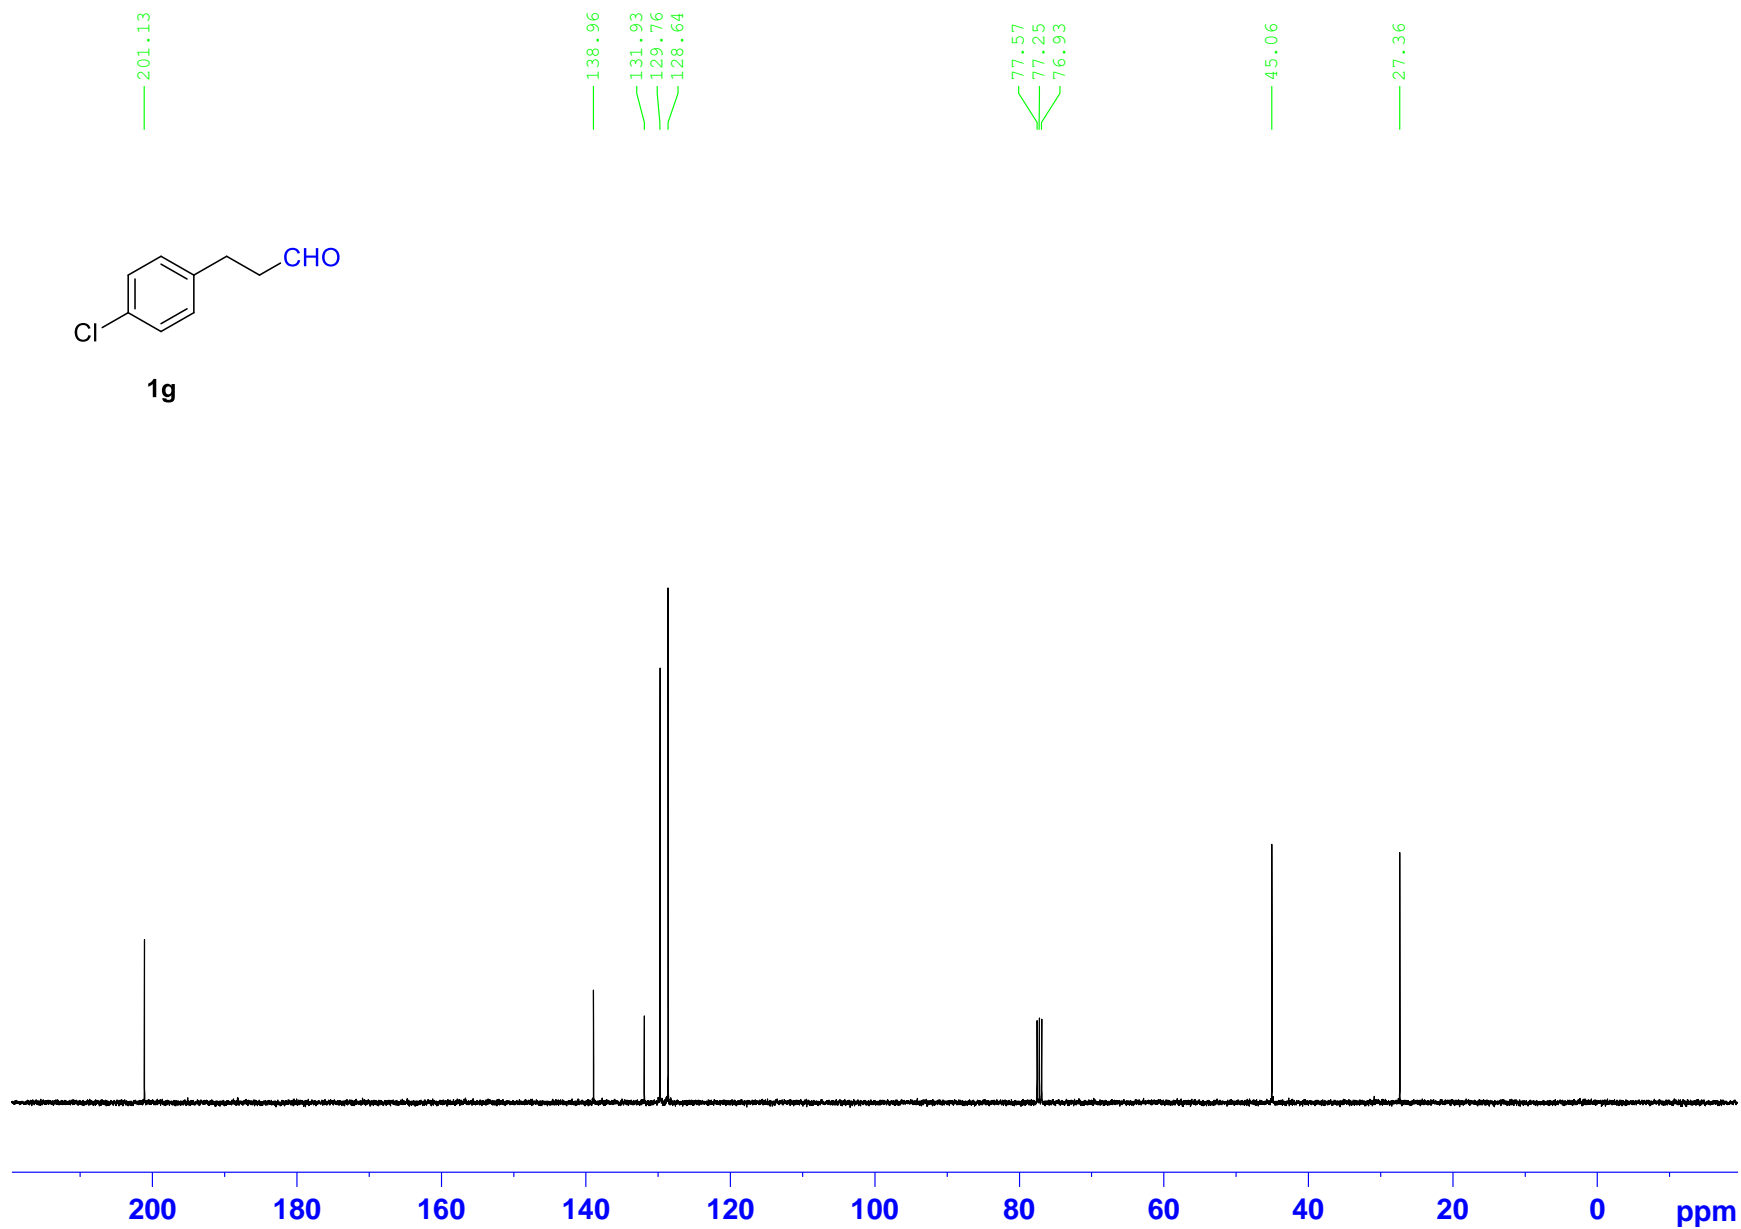

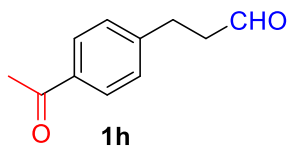

— 9.812

7.896  
7.875  
7.305  
7.284

3.024  
3.006  
2.987  
2.844  
2.826  
2.807  
2.571

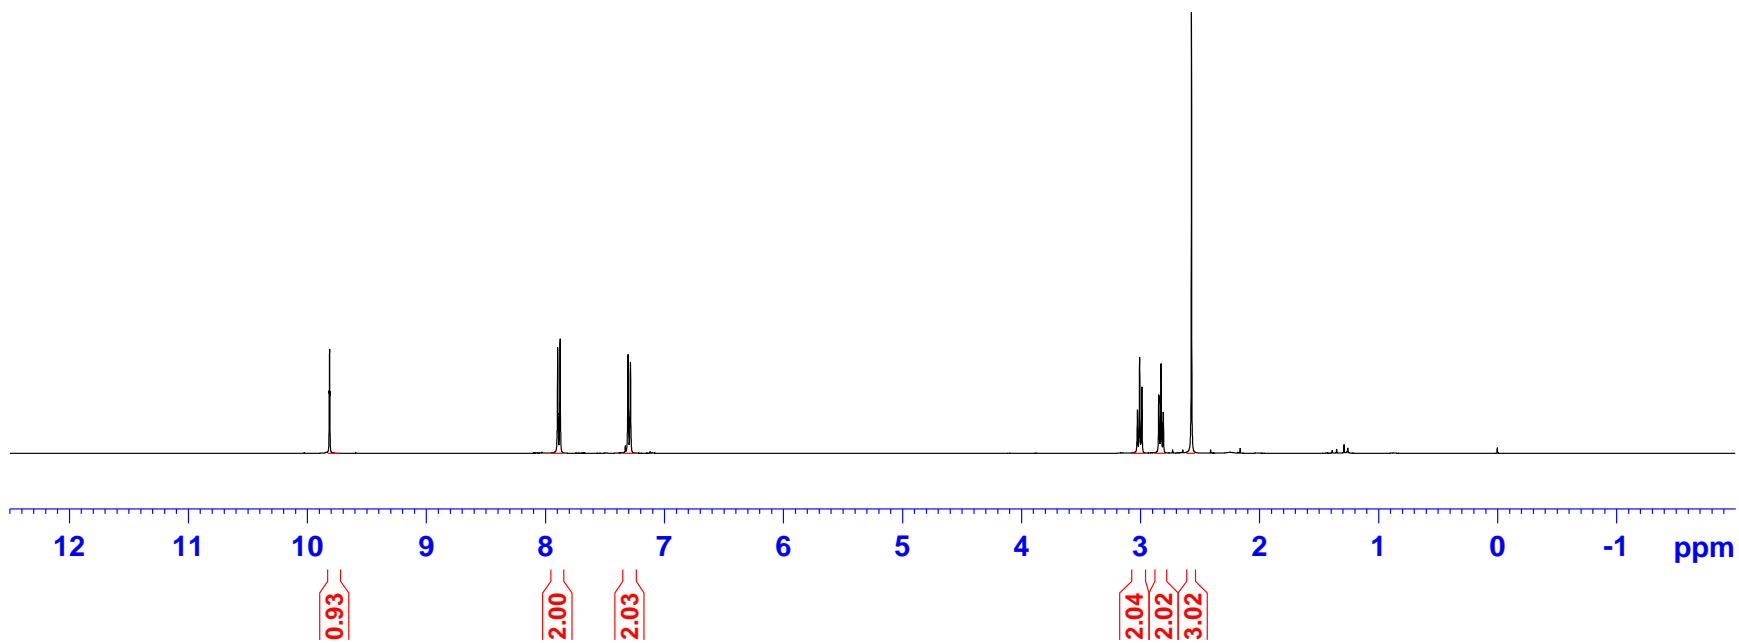



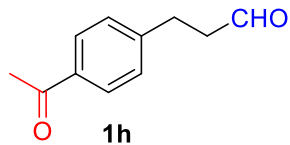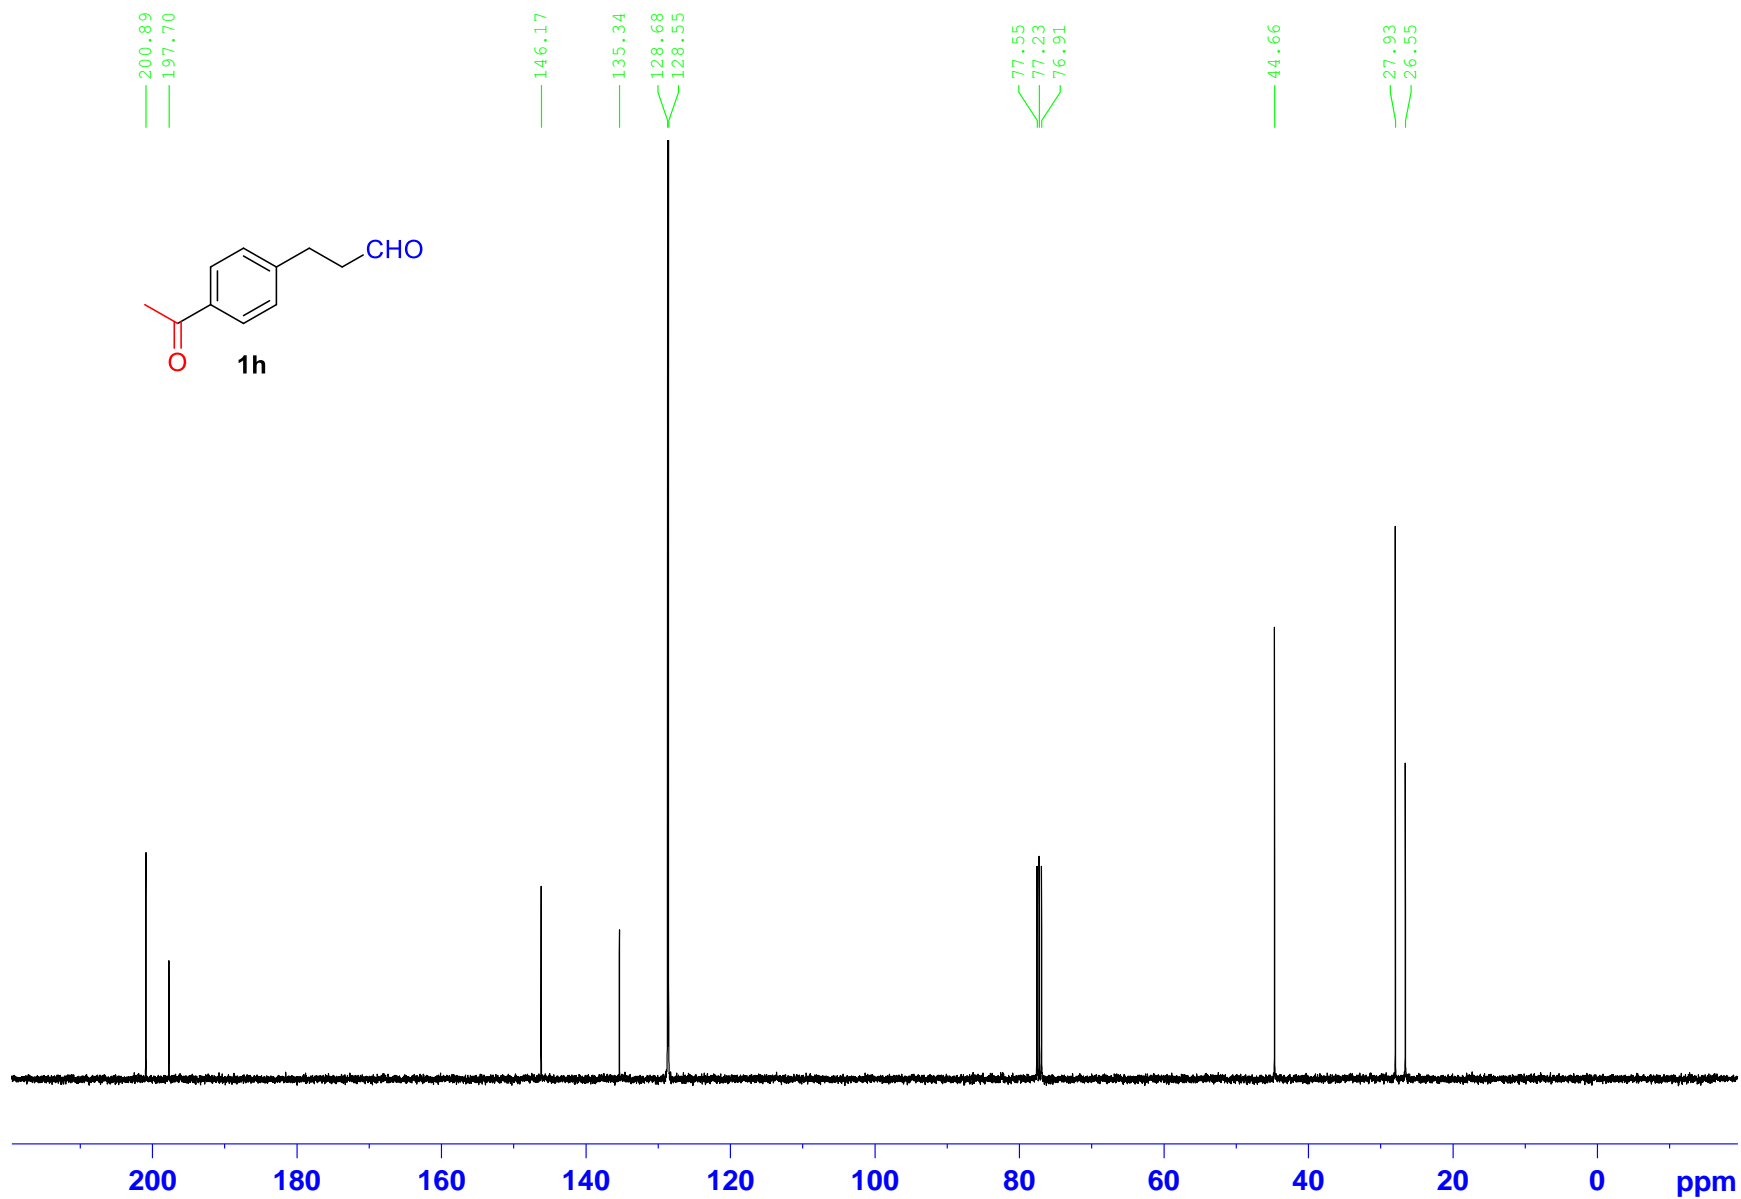

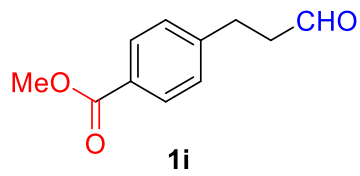

— 9.811

7.969  
7.949  
7.298  
7.274  
7.253

— 3.894  
3.017  
2.999  
2.980  
2.829  
2.811  
2.792

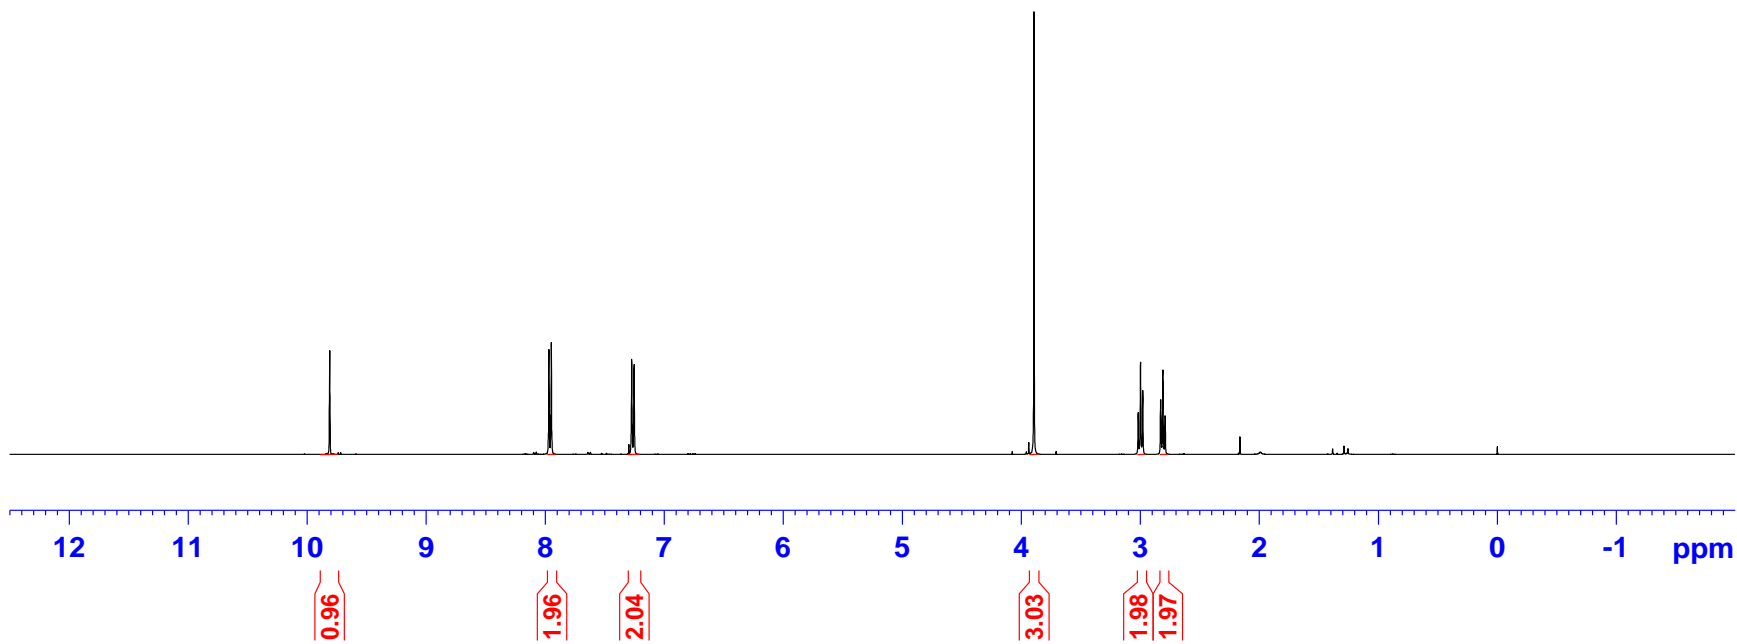

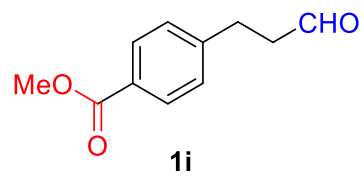

200.87

166.90

145.87

129.89  
128.37  
128.26

77.47  
77.15  
76.83

52.03

44.75

27.98

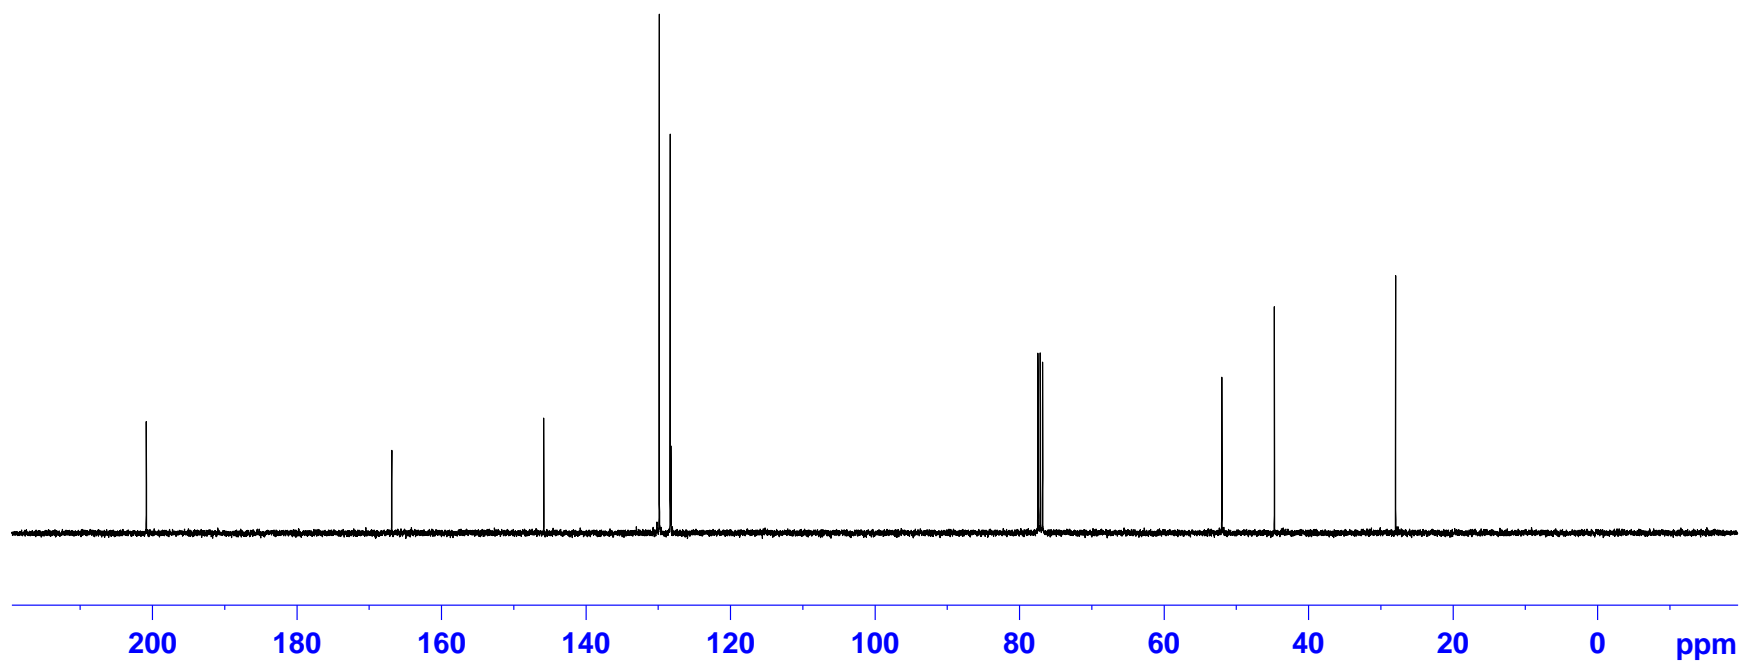

S131

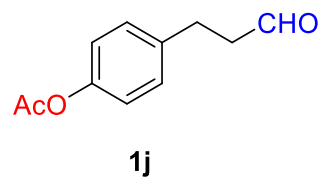

9.736

7.175  
7.154  
6.992  
6.971

2.912  
2.893  
2.874  
2.734  
2.715  
2.696  
2.241

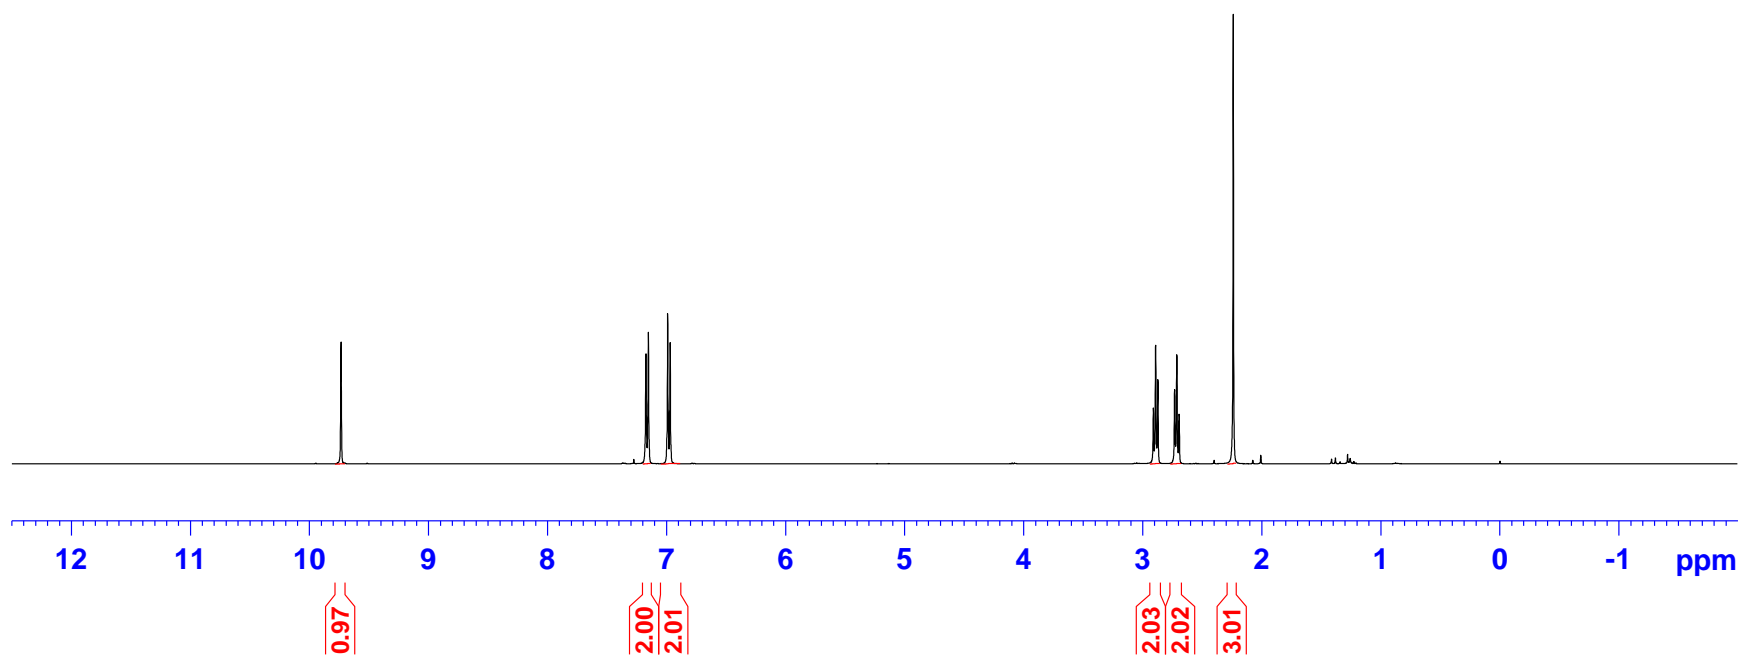

S132

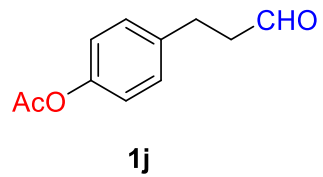

201.39

169.56

149.06

138.03

129.29

121.63

77.66

77.34

77.02

45.11

27.36

21.03

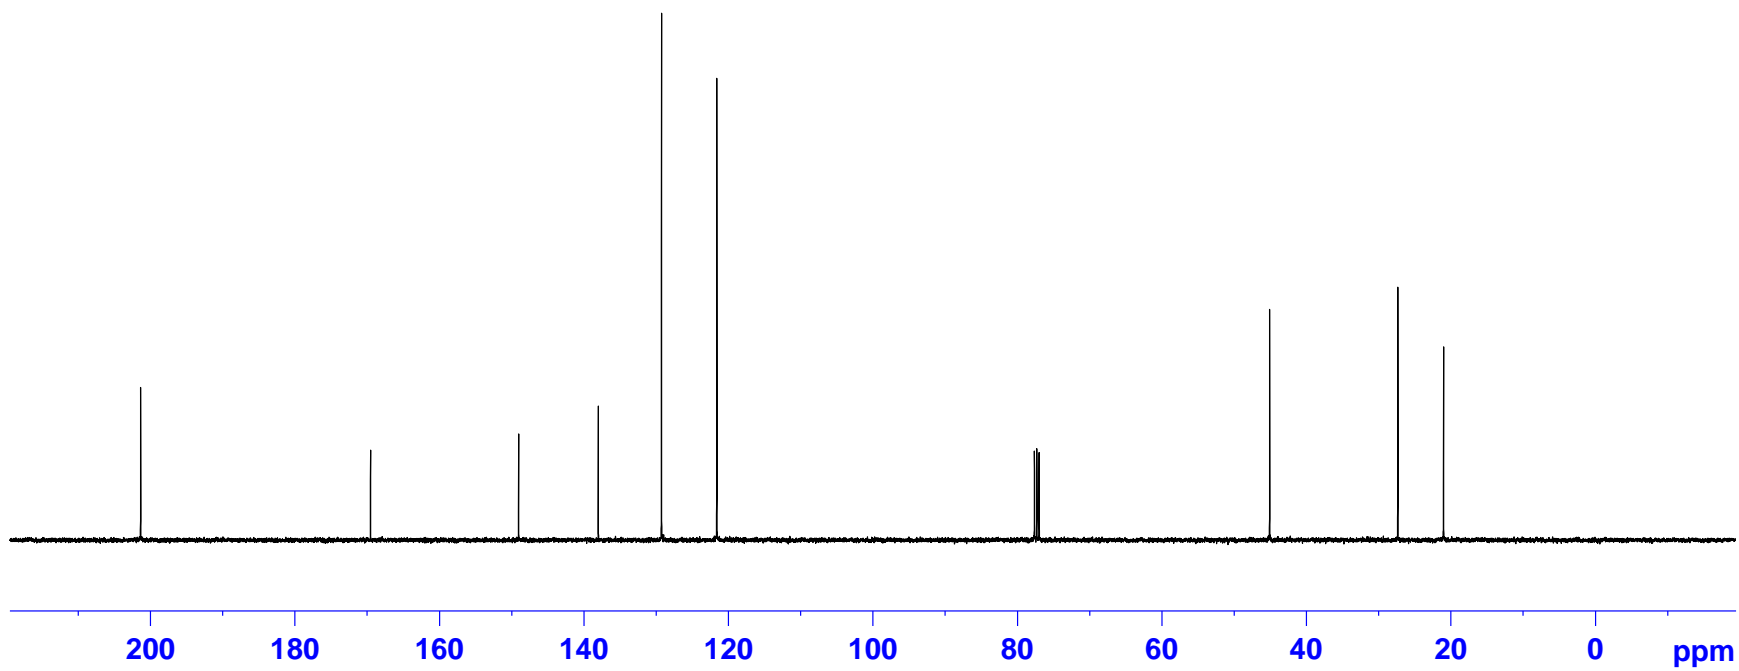

S133

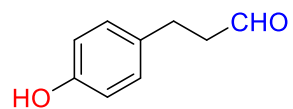

1k

9.773

7.252  
7.035  
7.013  
6.767  
6.745  
6.183

2.896  
2.877  
2.859  
2.761  
2.741  
2.723

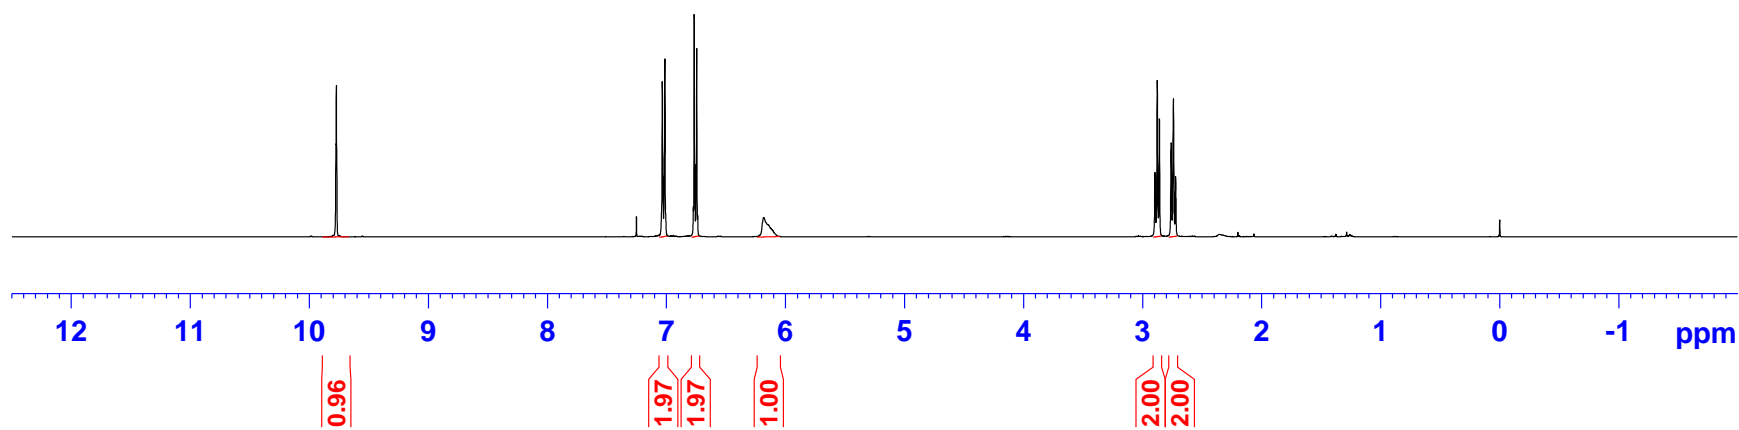

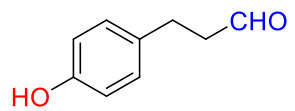

1k

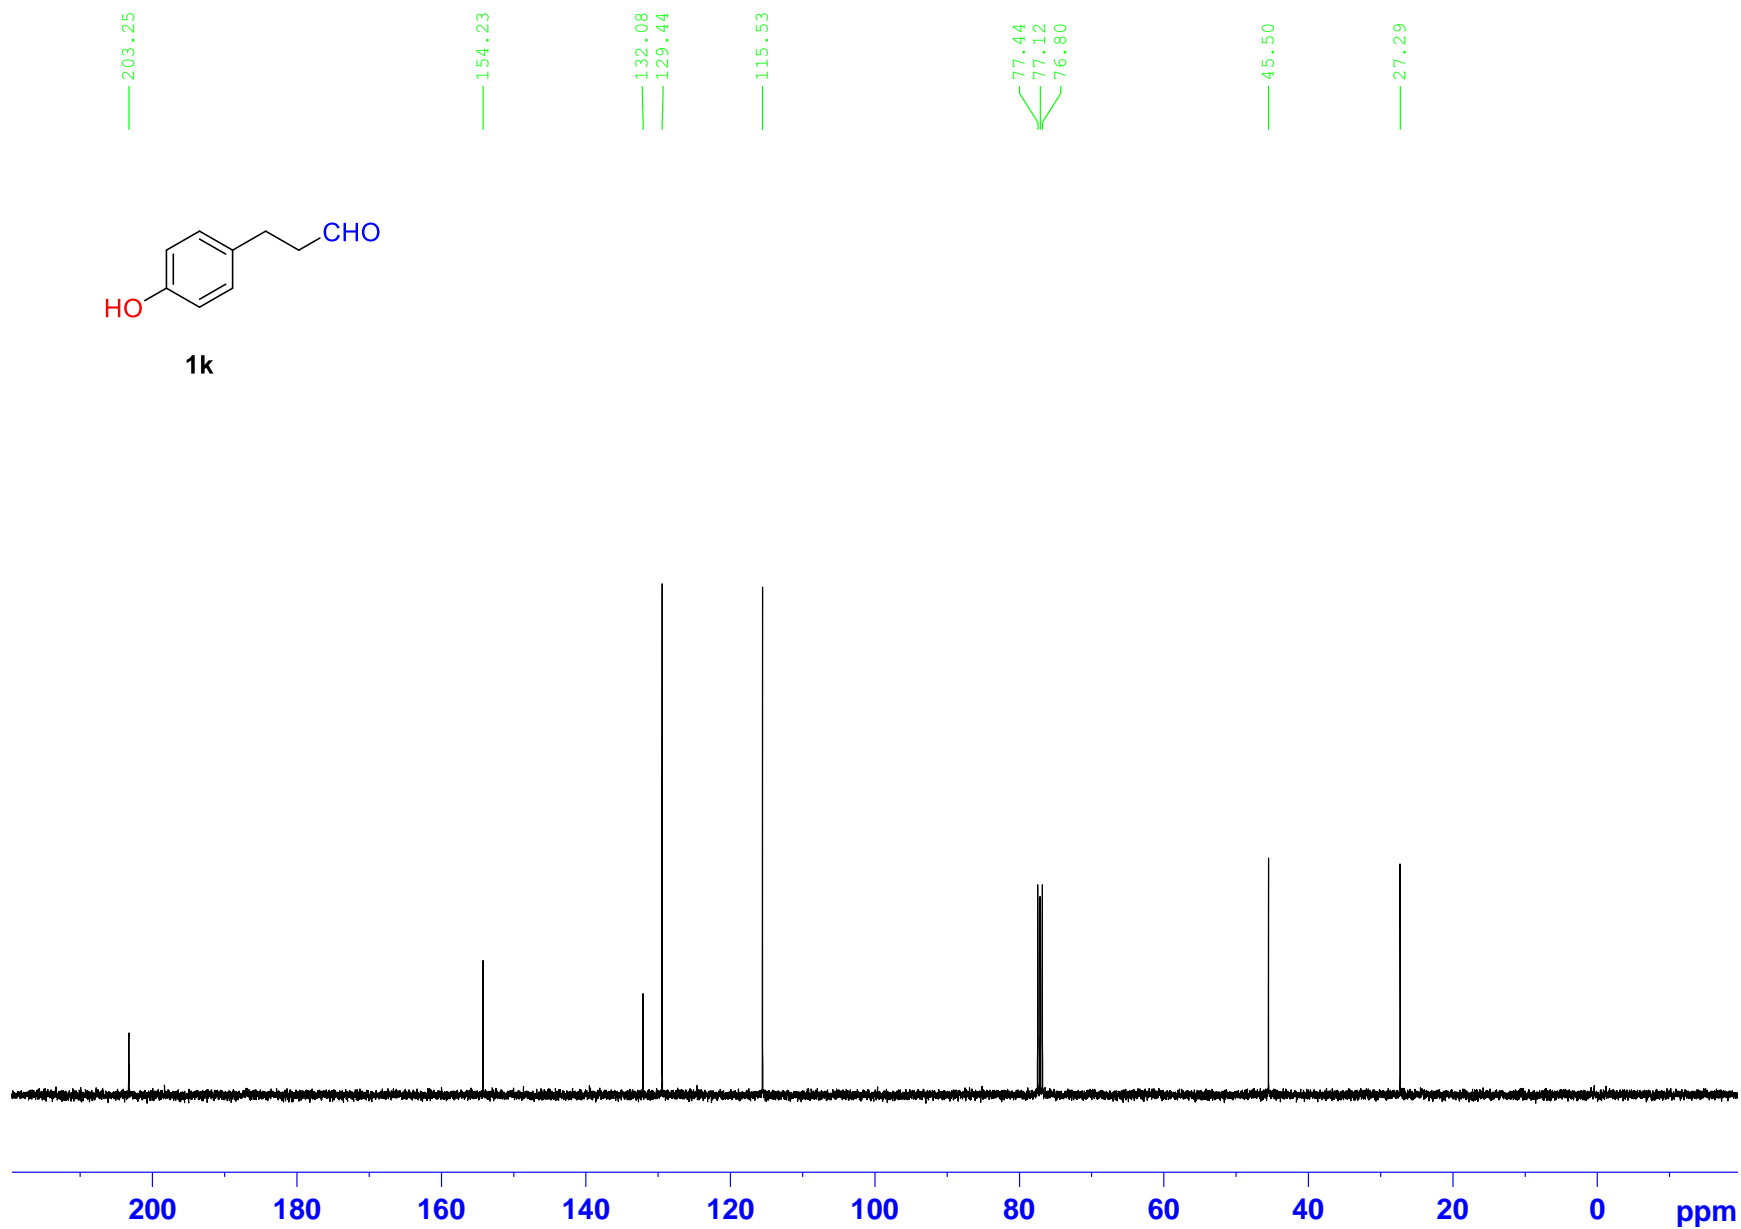

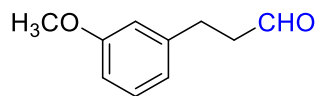

11

9.836

7.260  
7.238  
7.220  
6.821  
6.802  
6.799  
6.791  
6.773

3.818  
2.978  
2.960  
2.941  
2.817  
2.799  
2.779

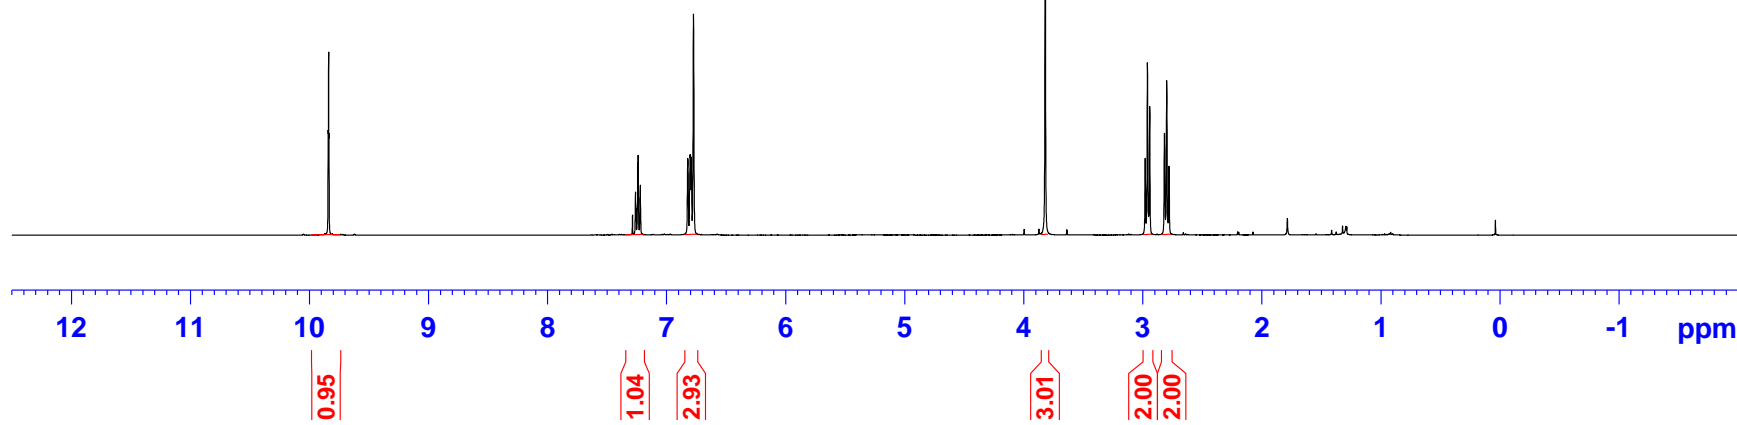



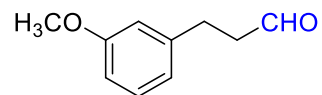

11

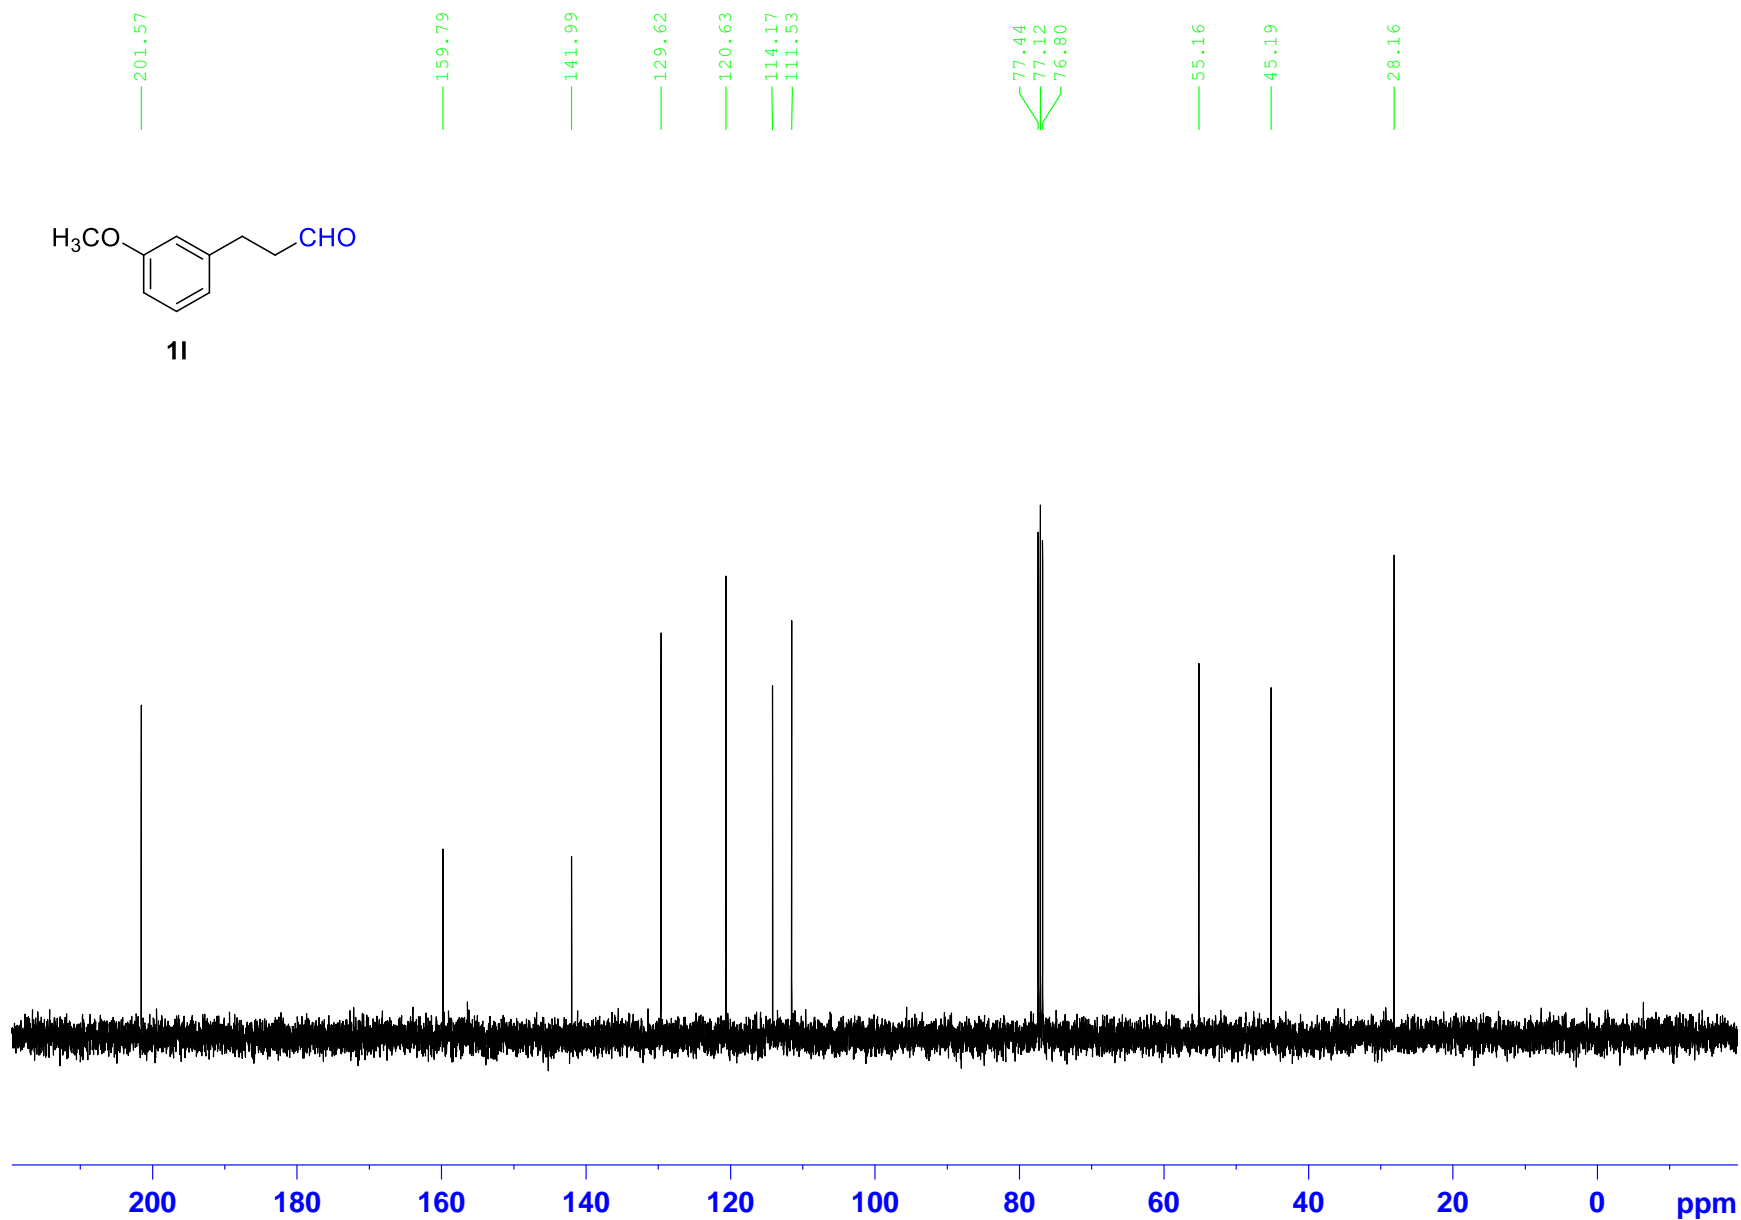

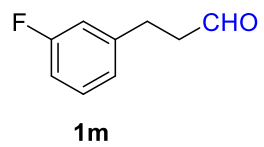

— 9.827

7.296  
7.287  
7.280  
7.276  
7.273  
7.261  
7.258  
7.254  
7.239  
7.001  
6.982  
6.935  
6.912  
6.908

2.989  
2.970  
2.951  
2.823  
2.804  
2.785

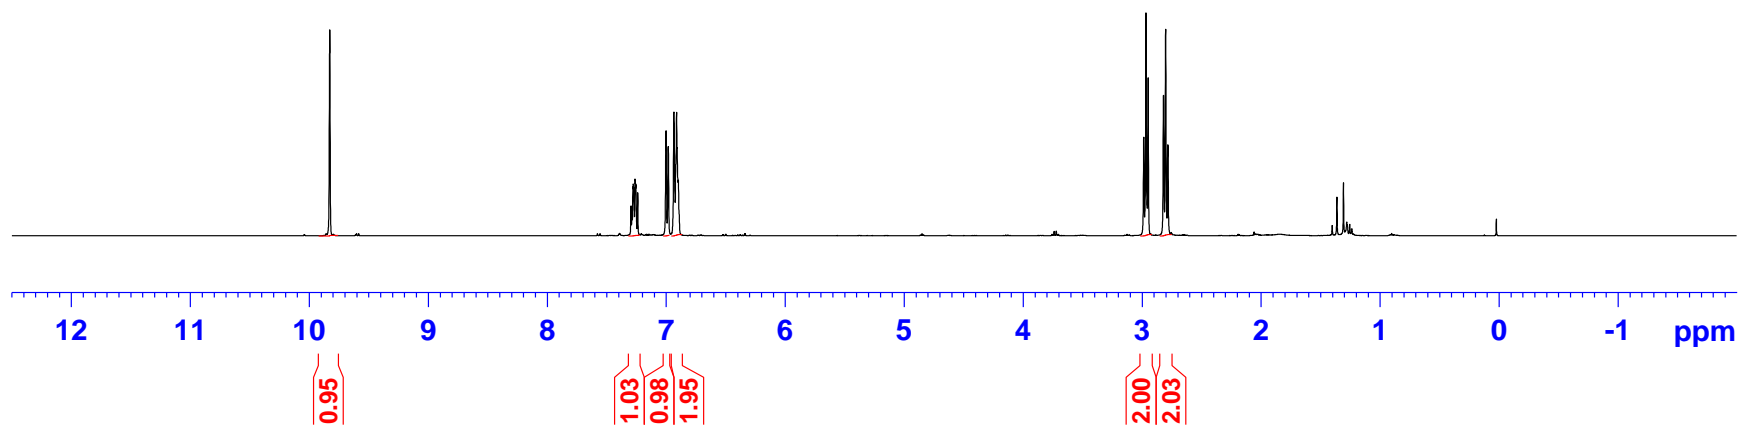

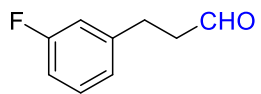

1m

201.03

164.15  
161.71

142.99  
142.91

130.10  
130.01  
124.00  
123.97

115.33  
115.11  
113.30  
113.09

77.41  
77.10  
76.78

44.91

27.75  
27.74

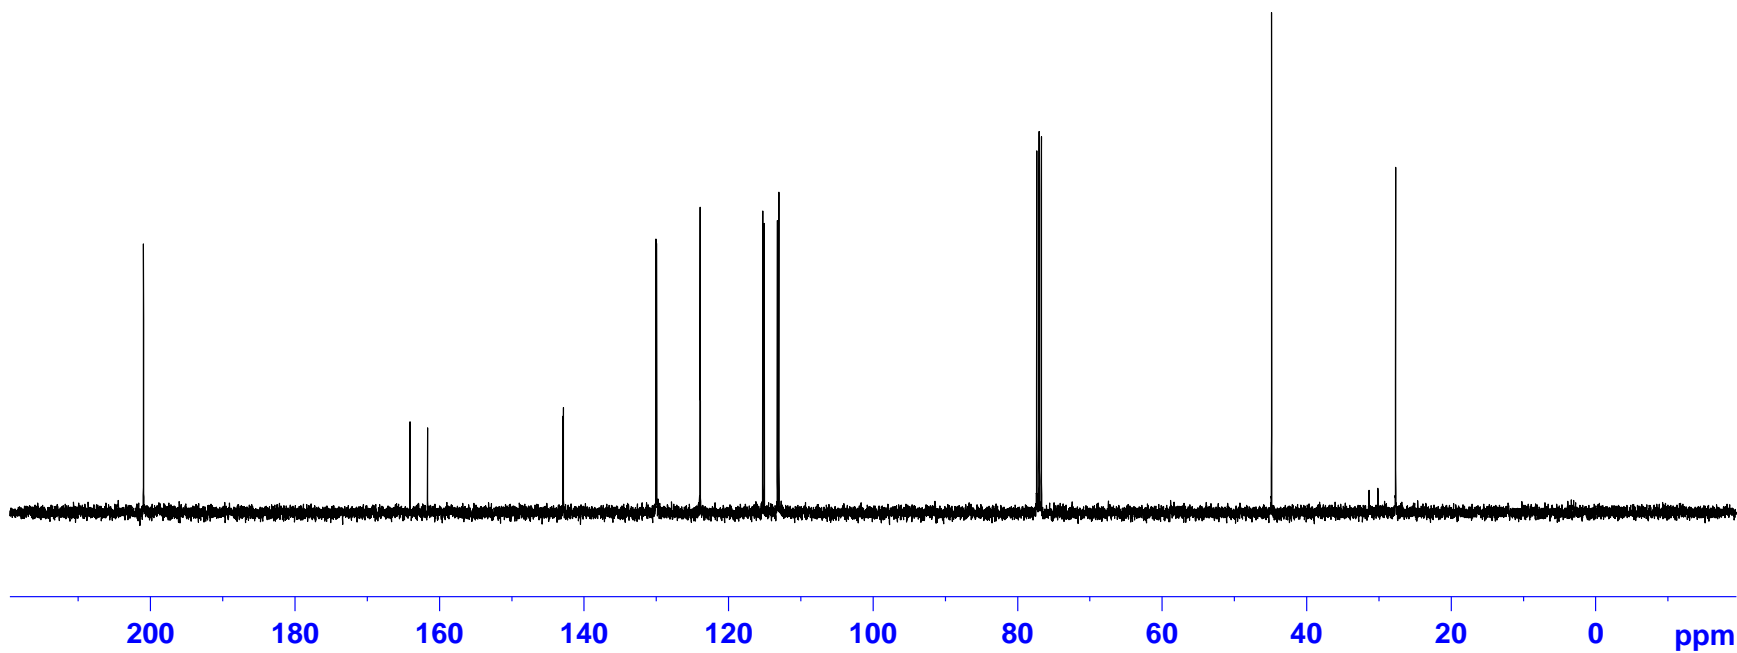

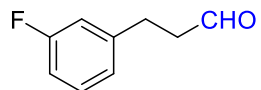

1m

— -113.285

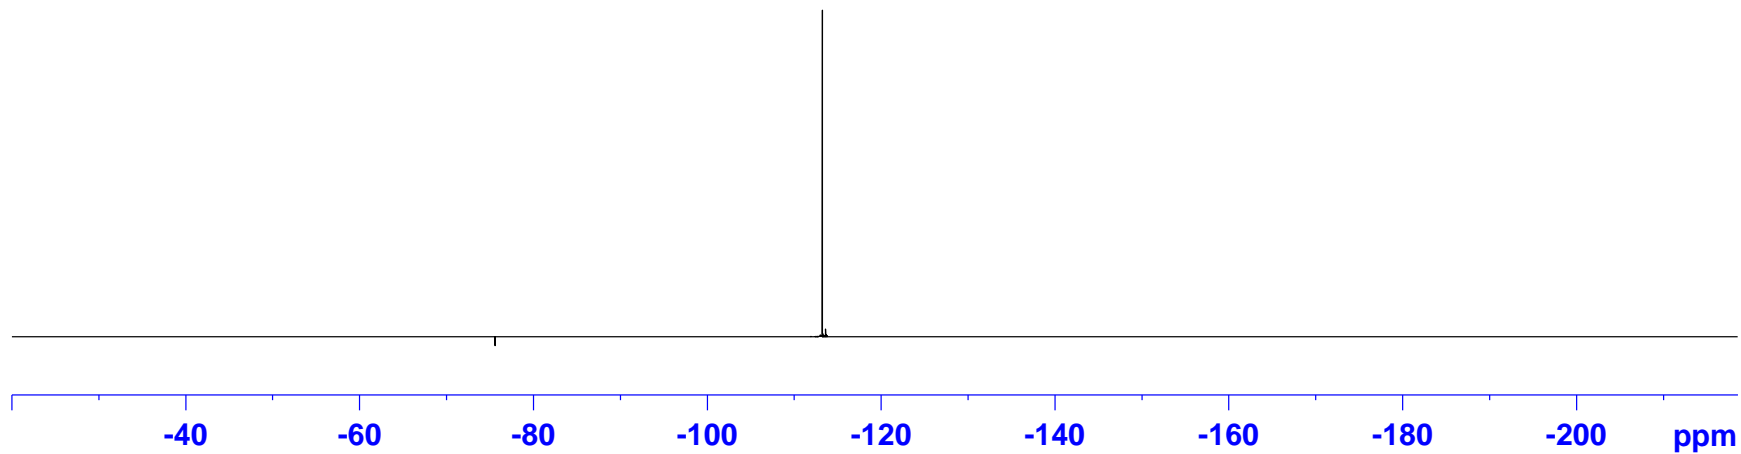

S140

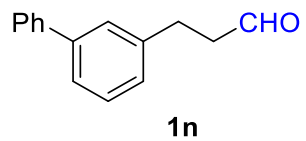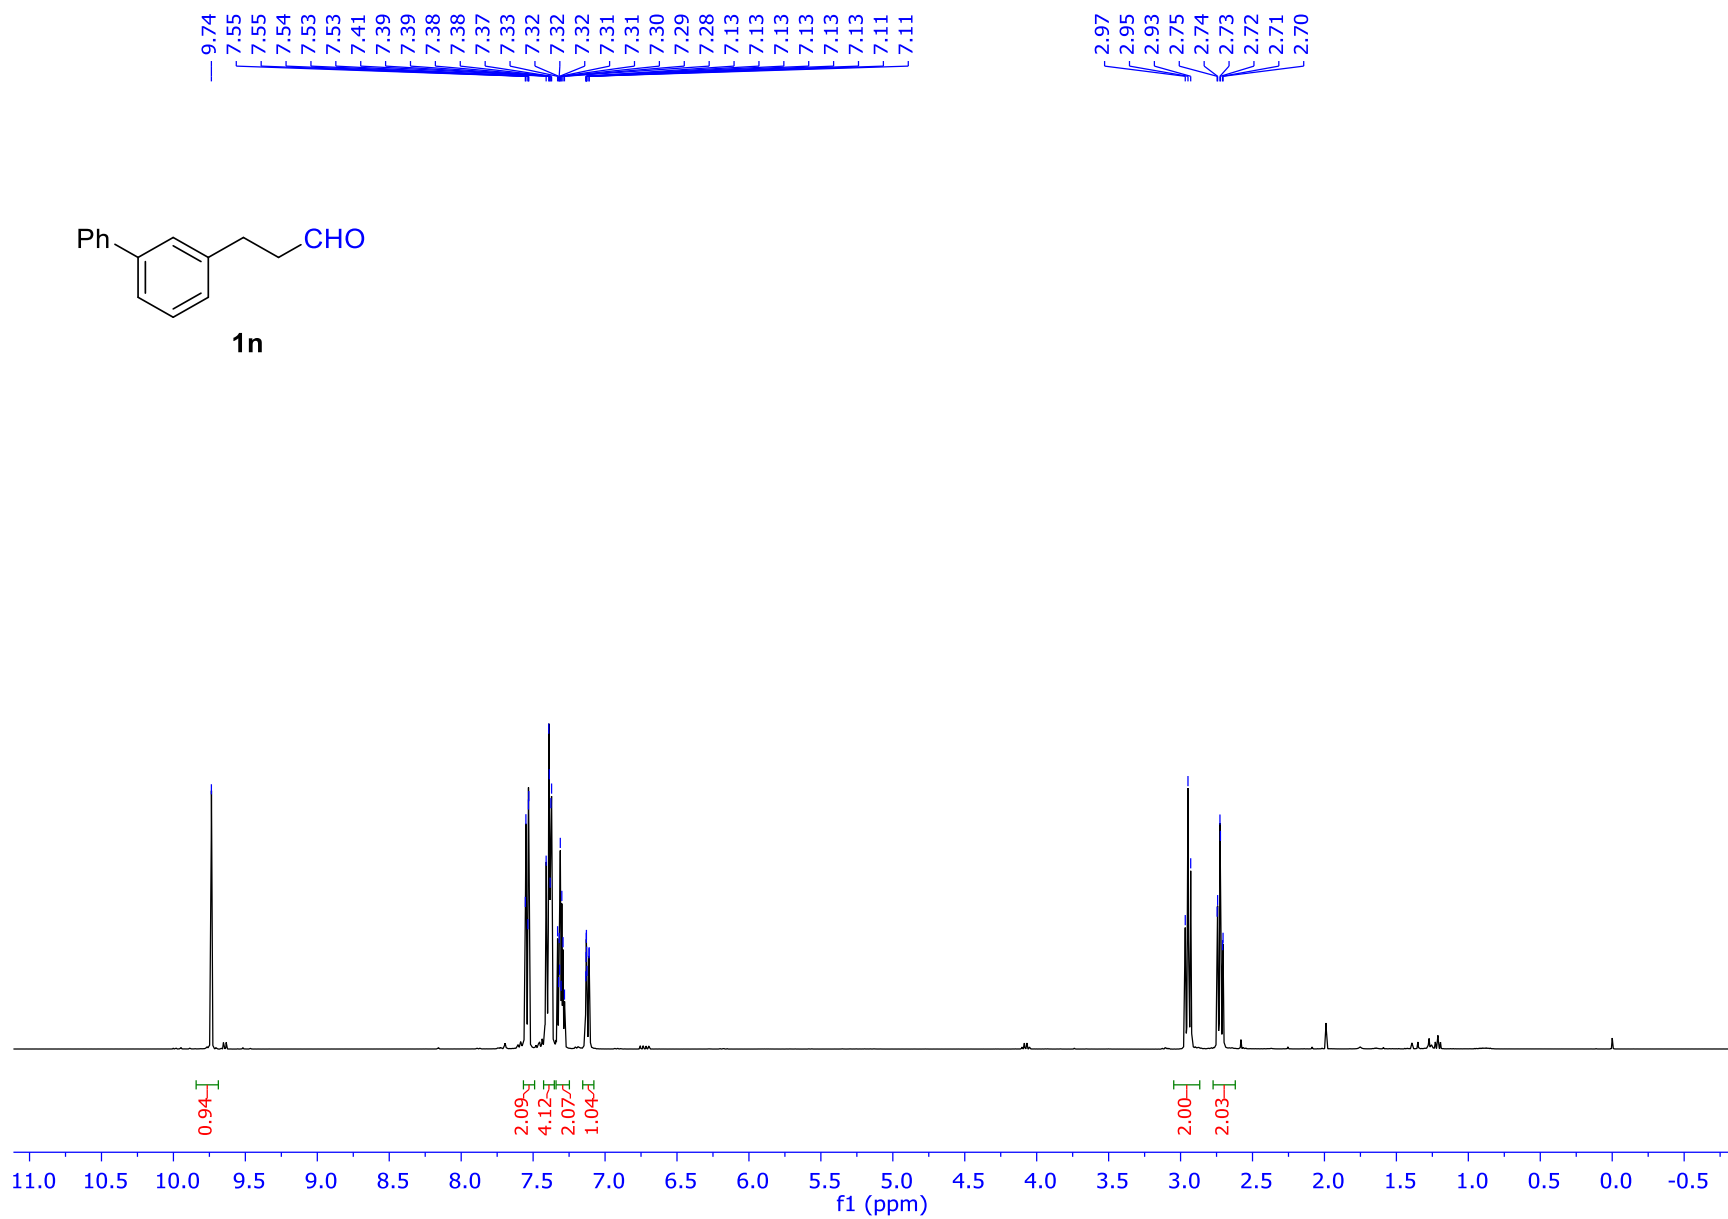

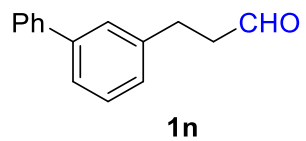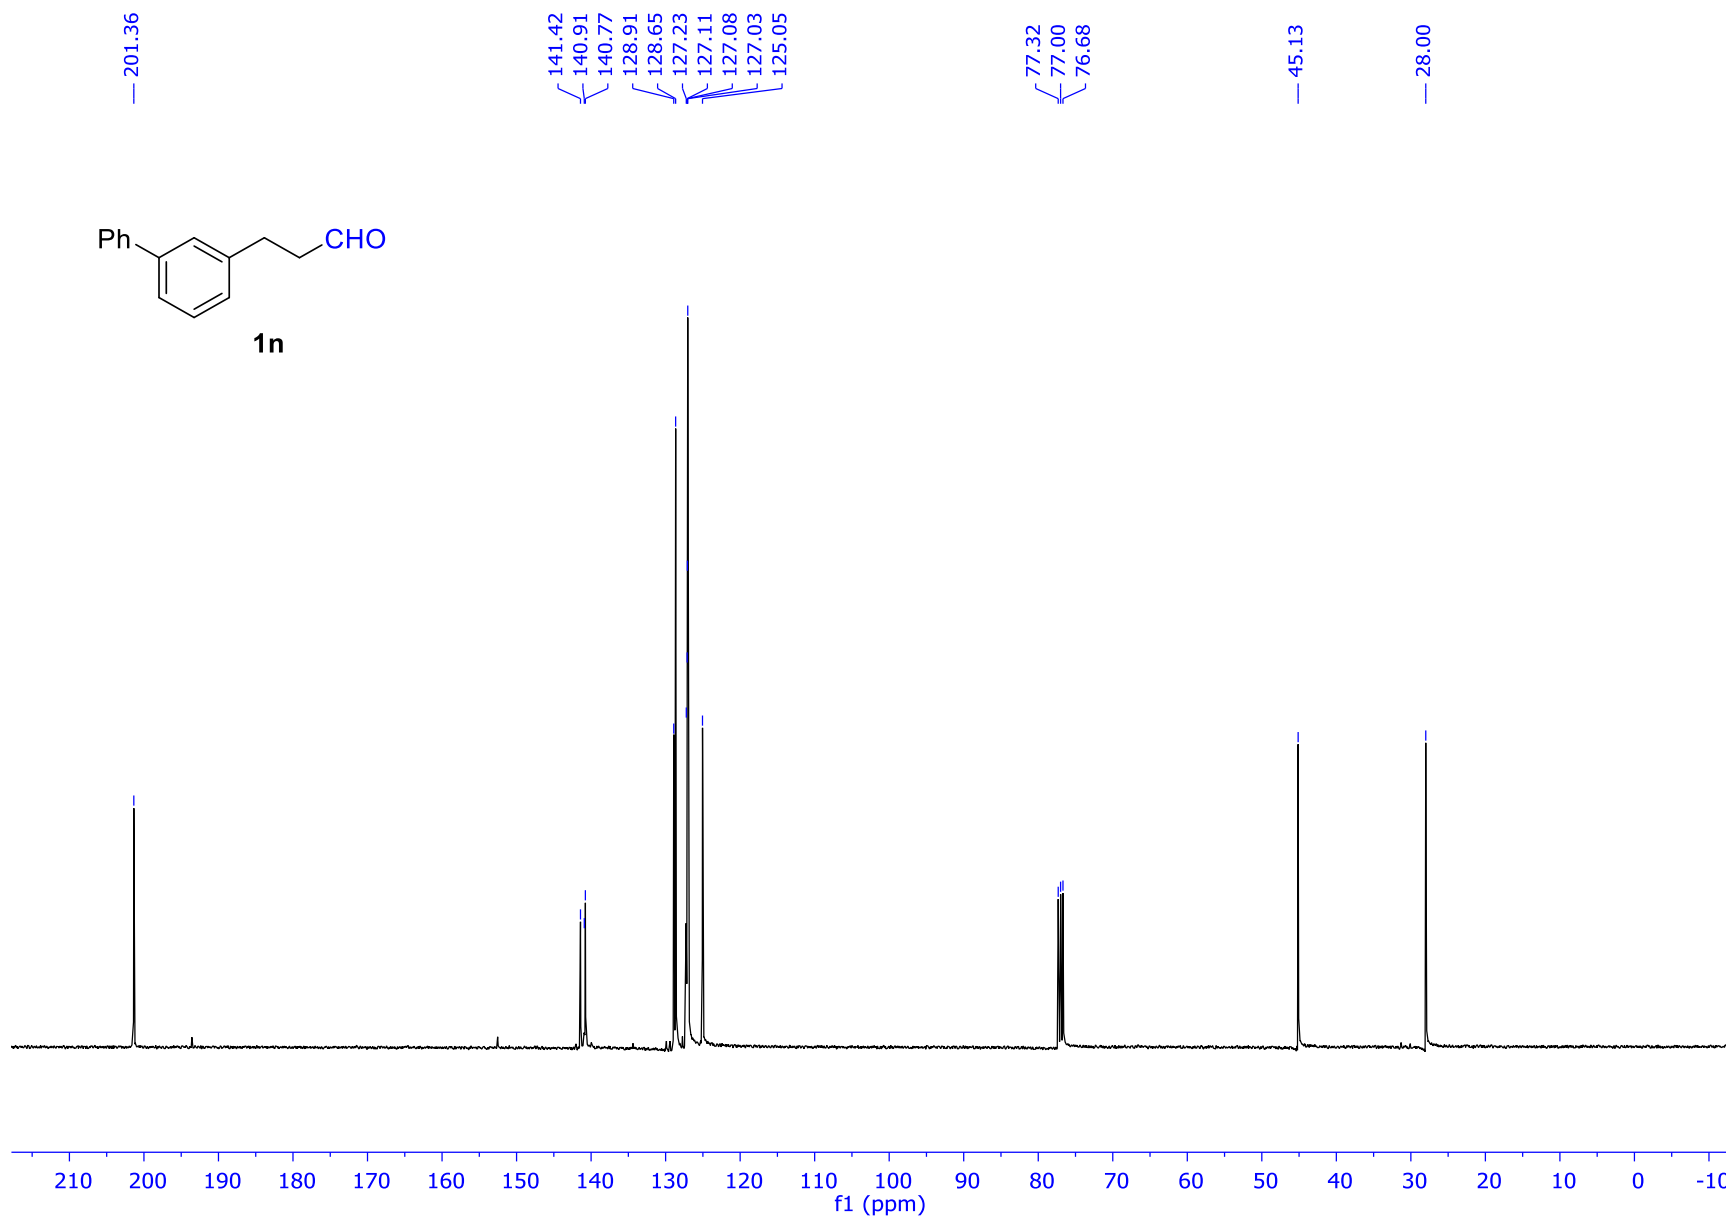

S142

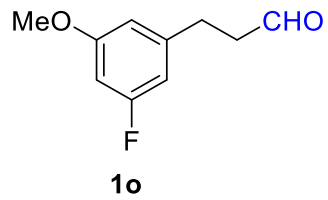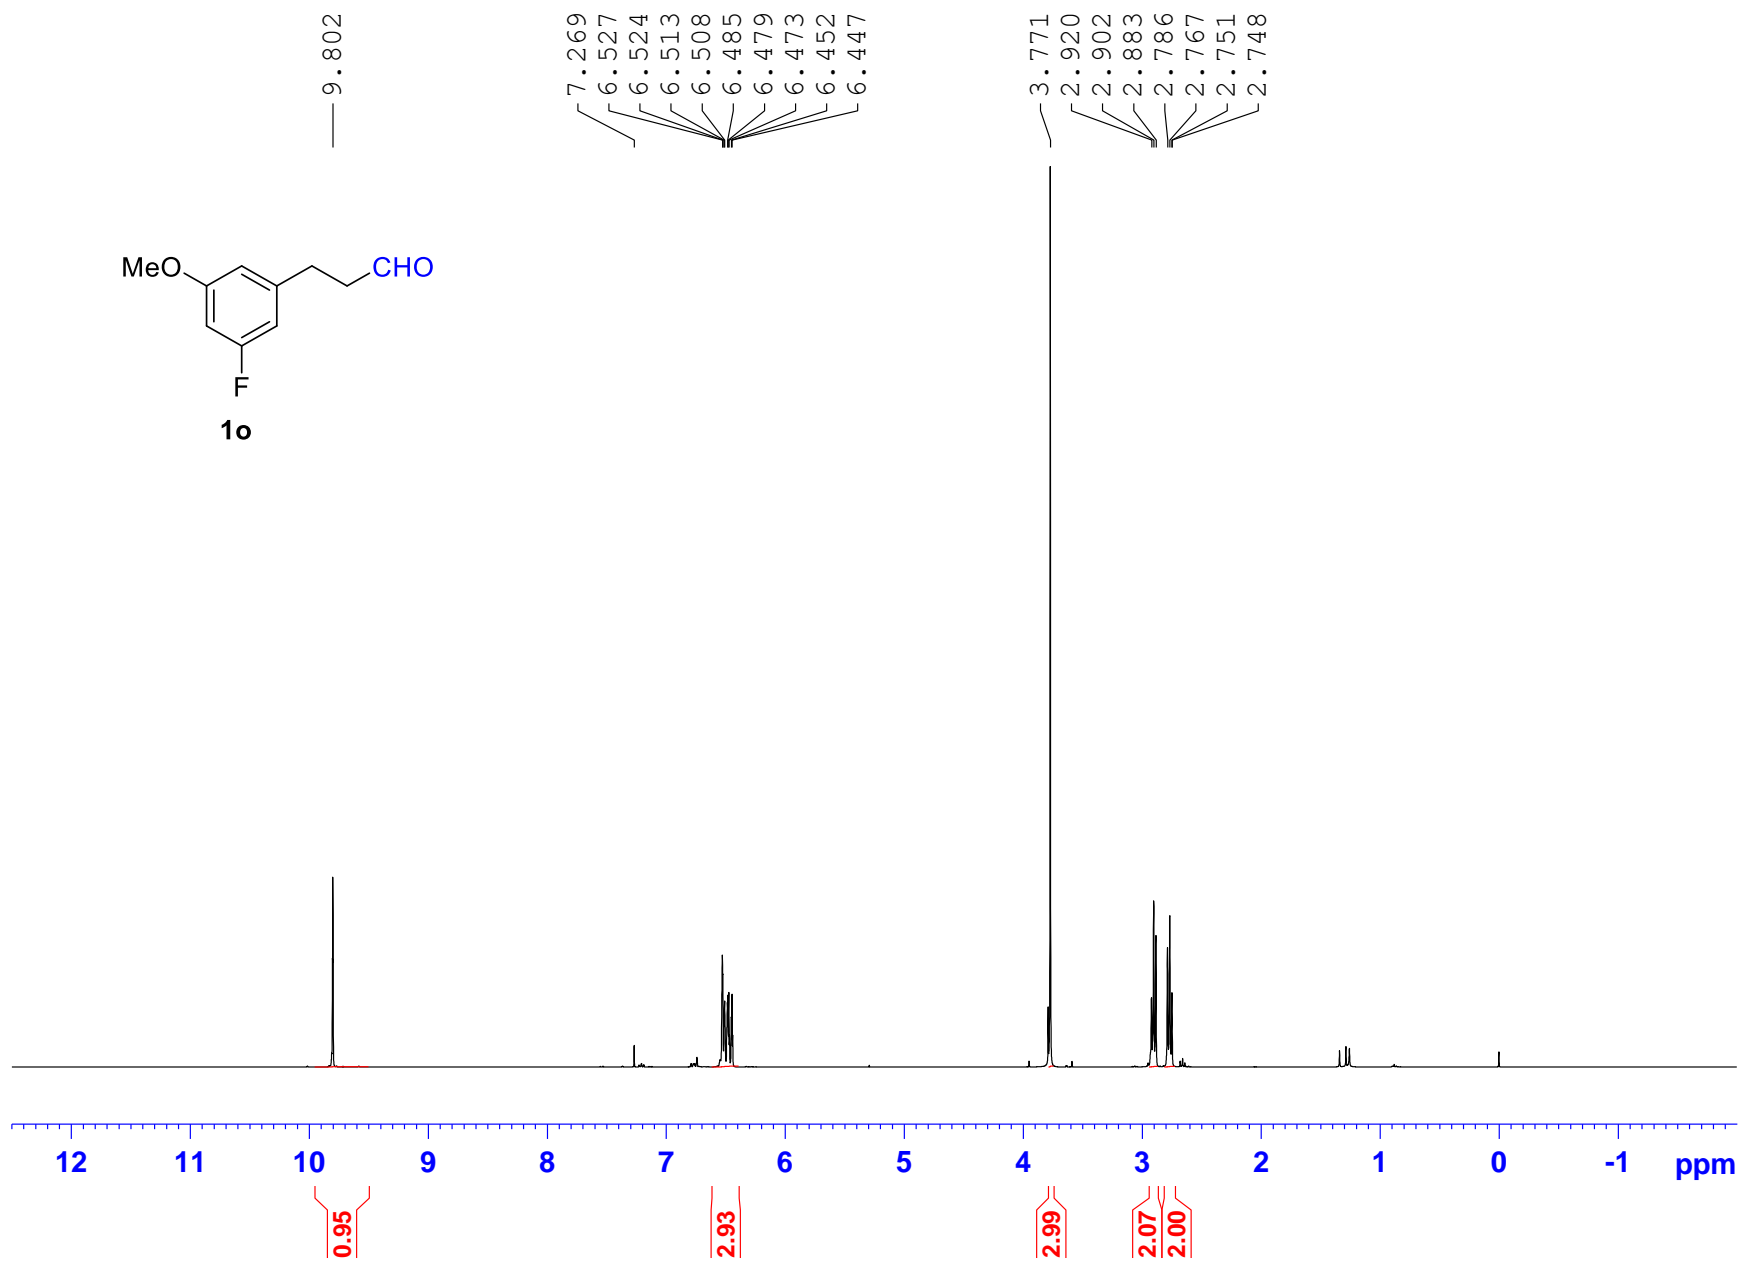

S143

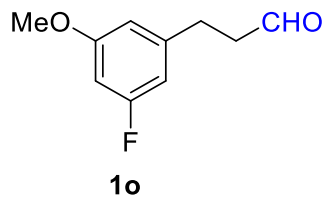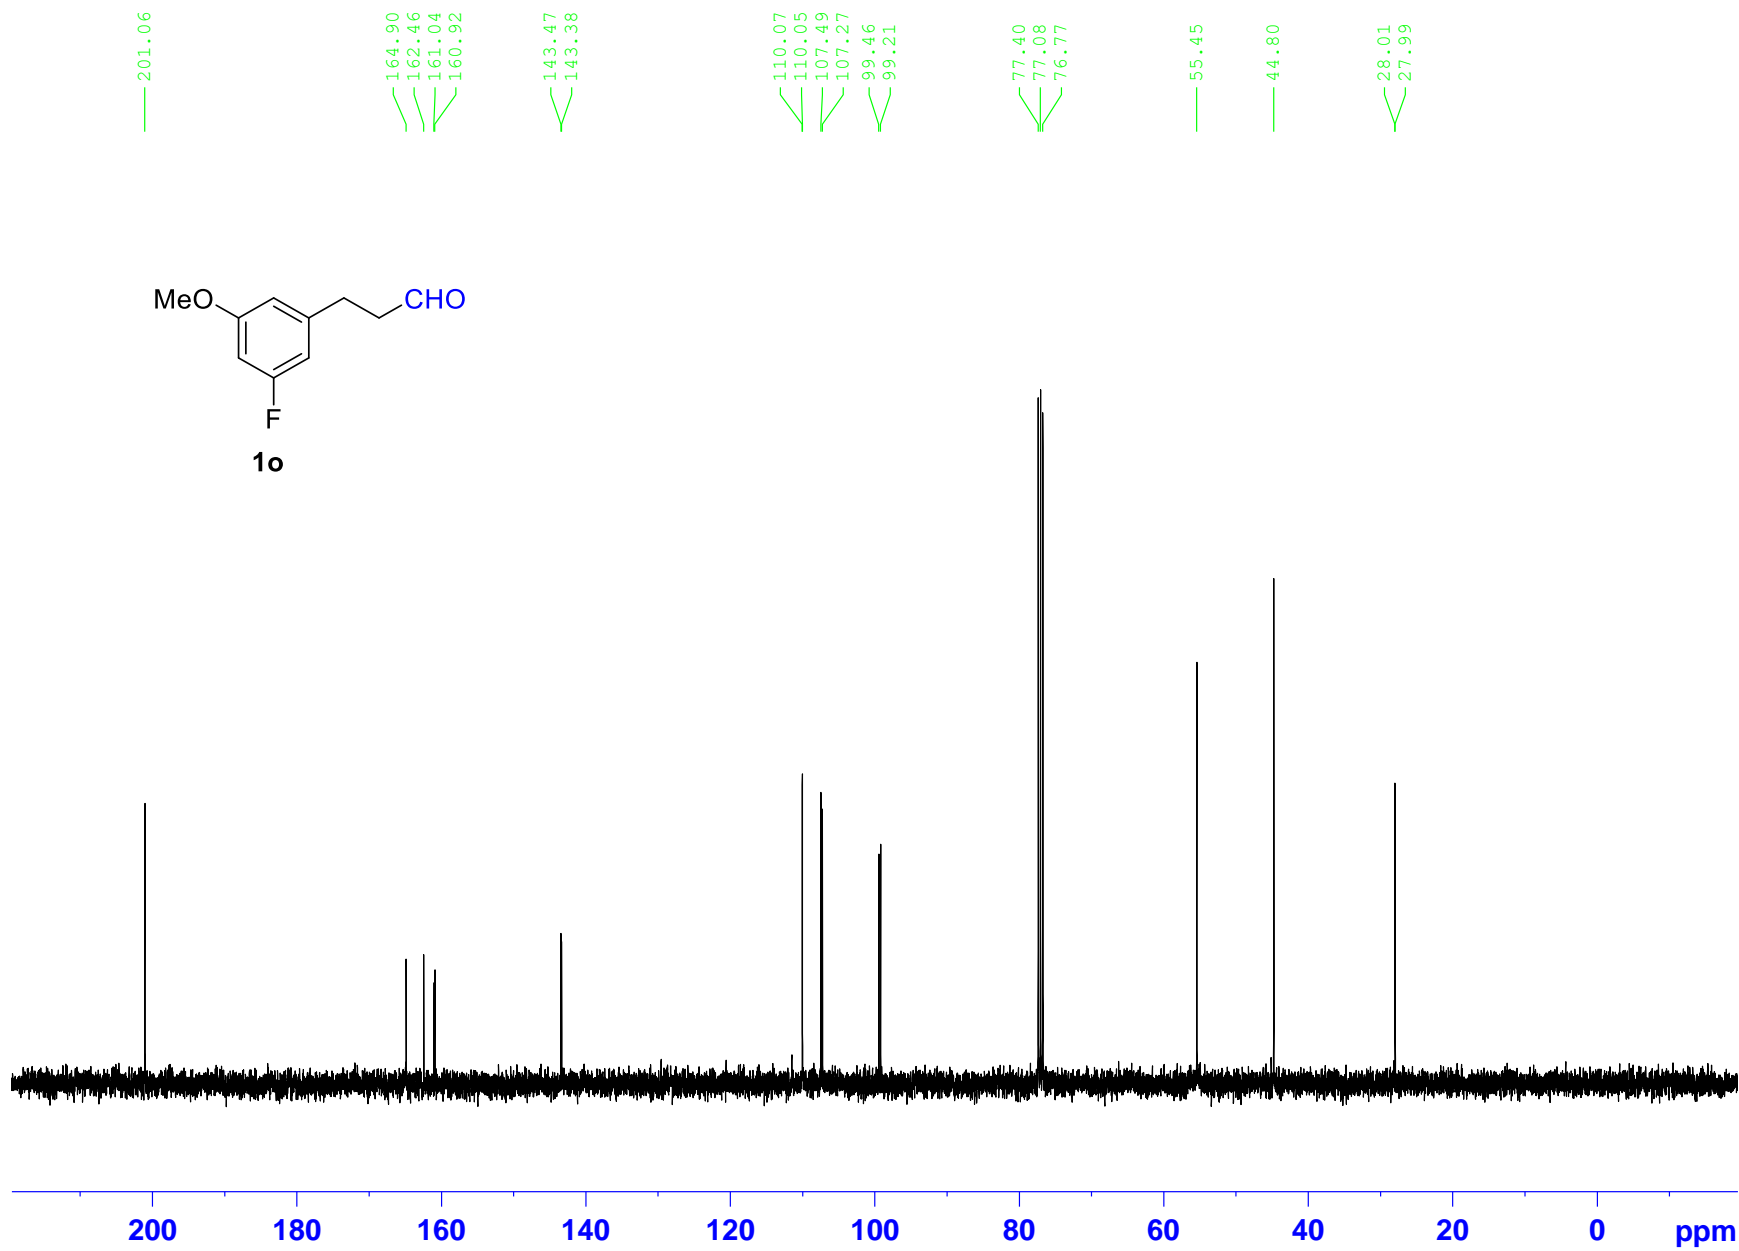

S144



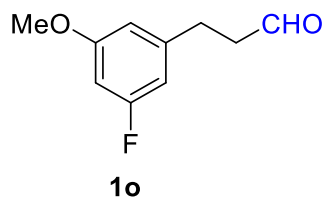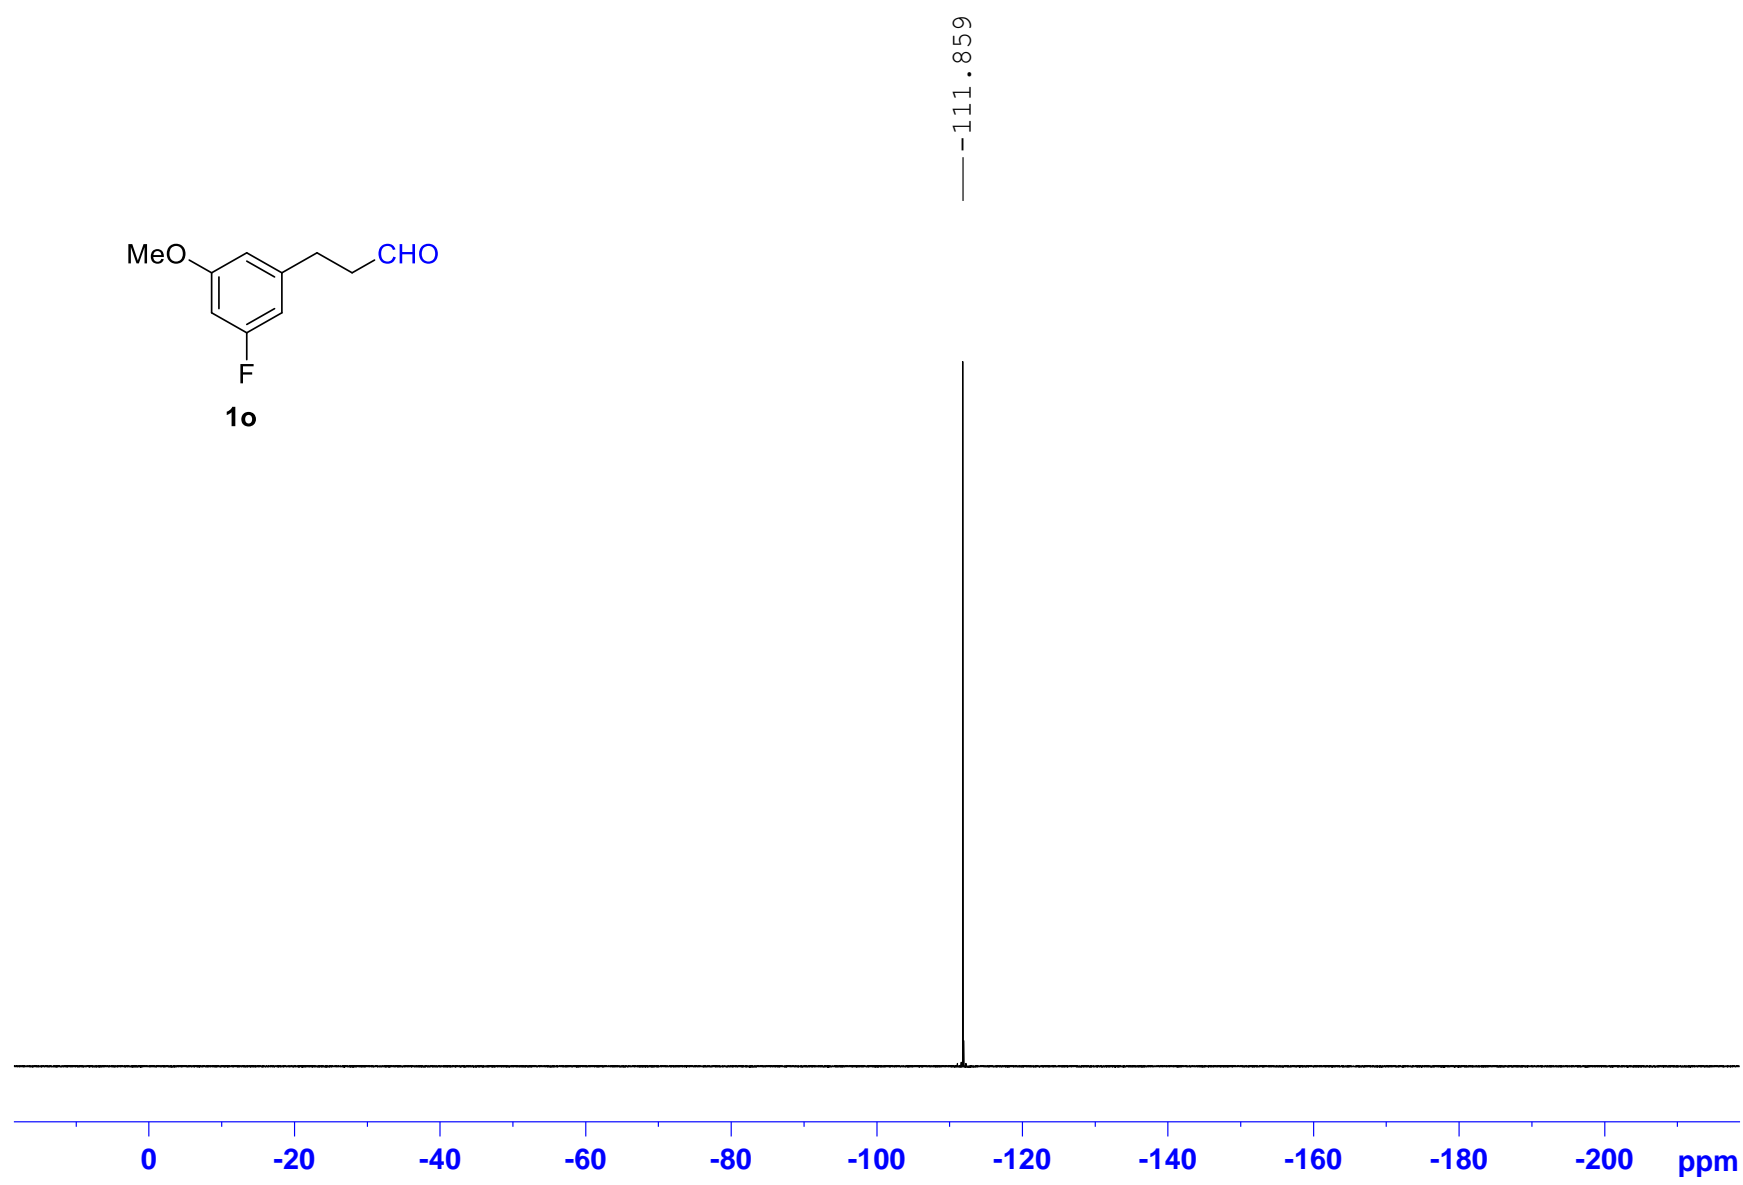

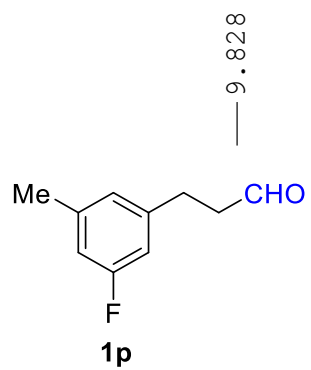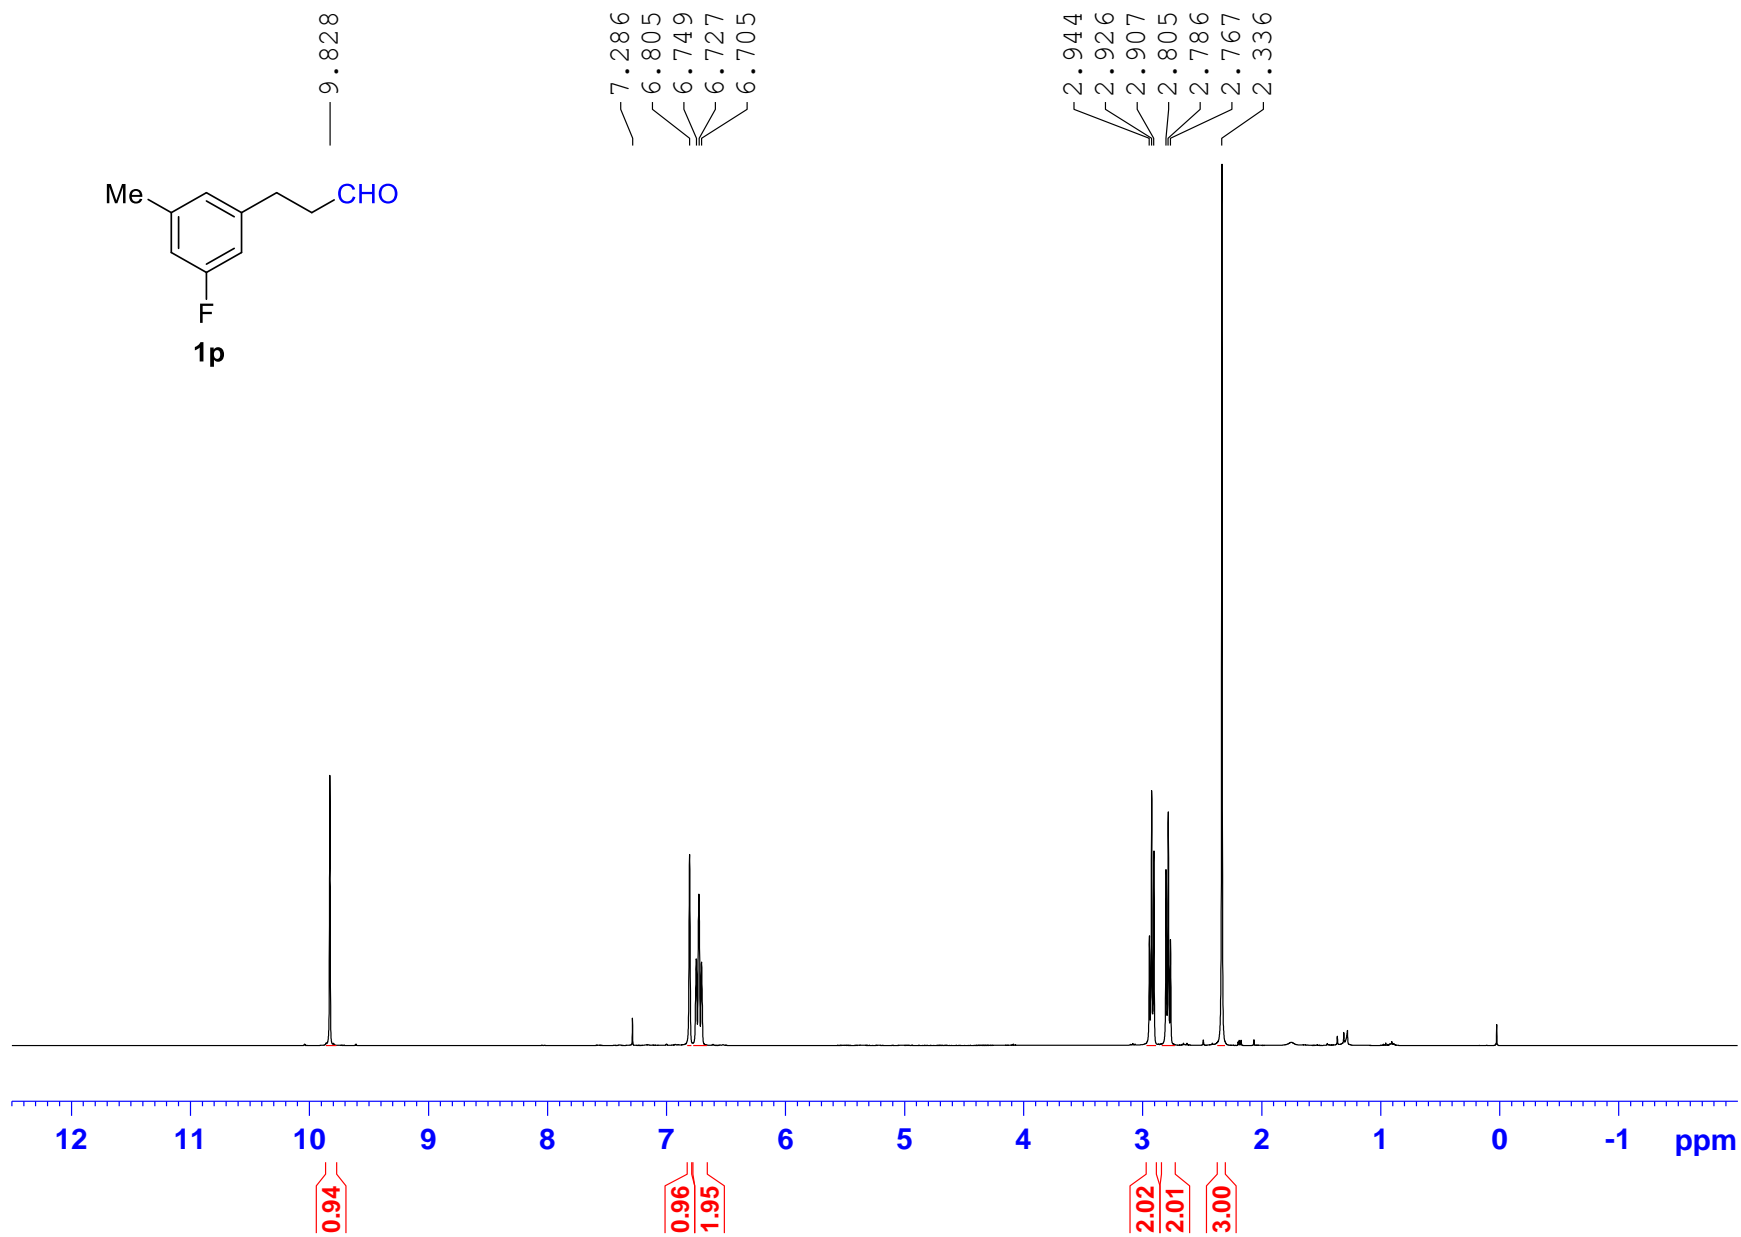

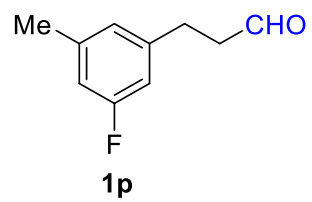

201.17

164.14  
161.71

142.54  
142.46  
140.54  
140.46

124.80  
124.77

113.93  
113.72  
112.25  
112.04

77.40  
77.08  
76.77

44.96

27.74  
21.28

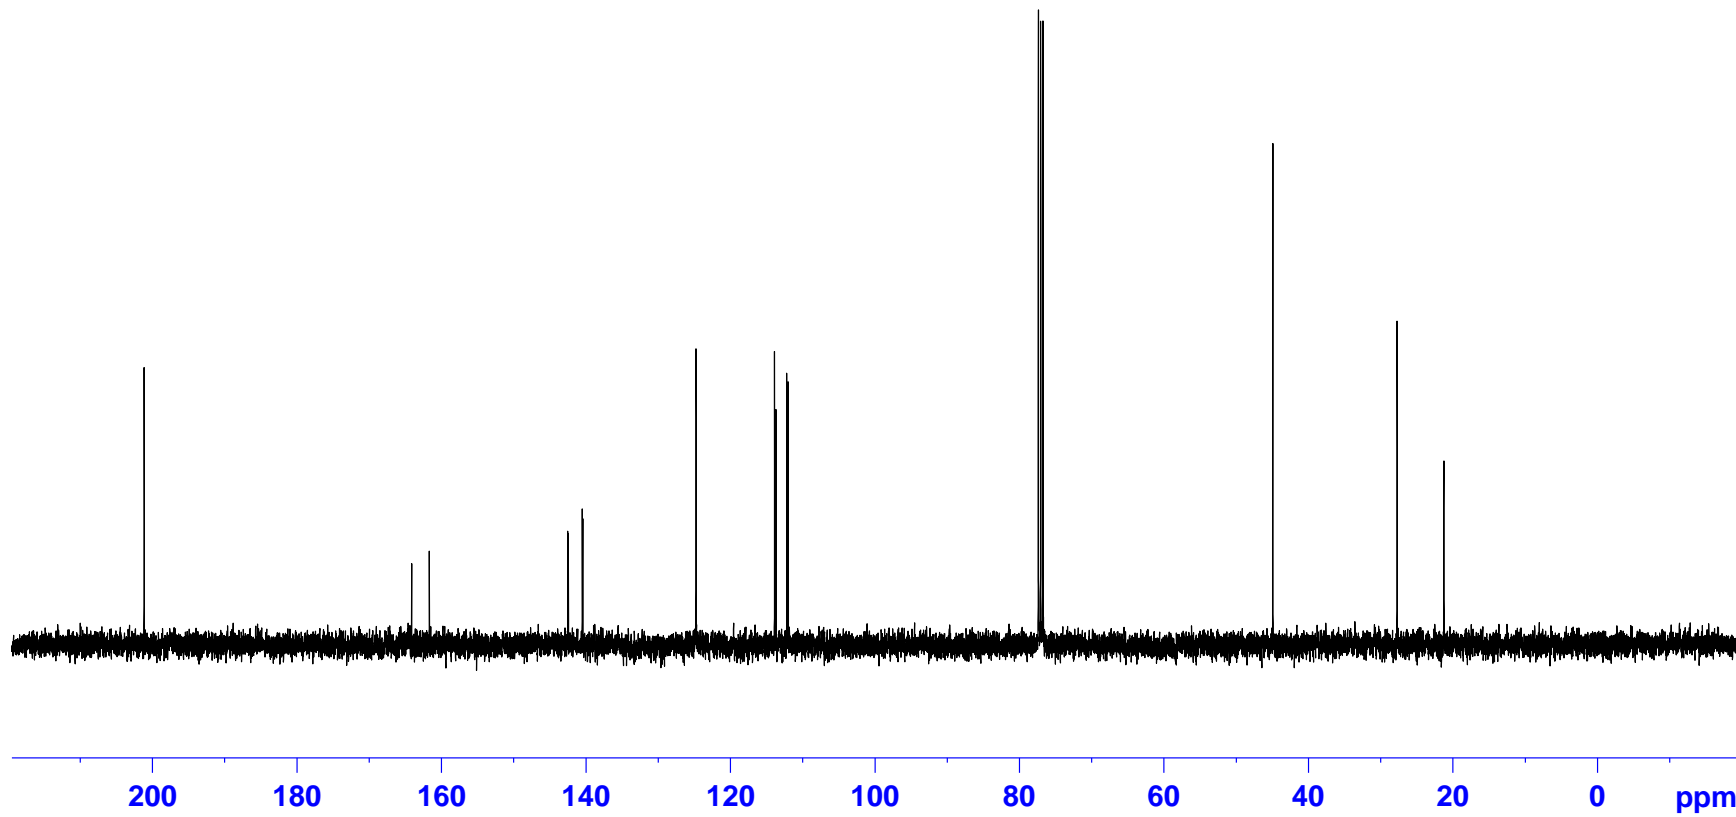

S147

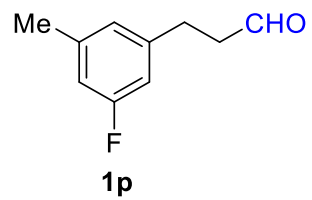

— -114.458

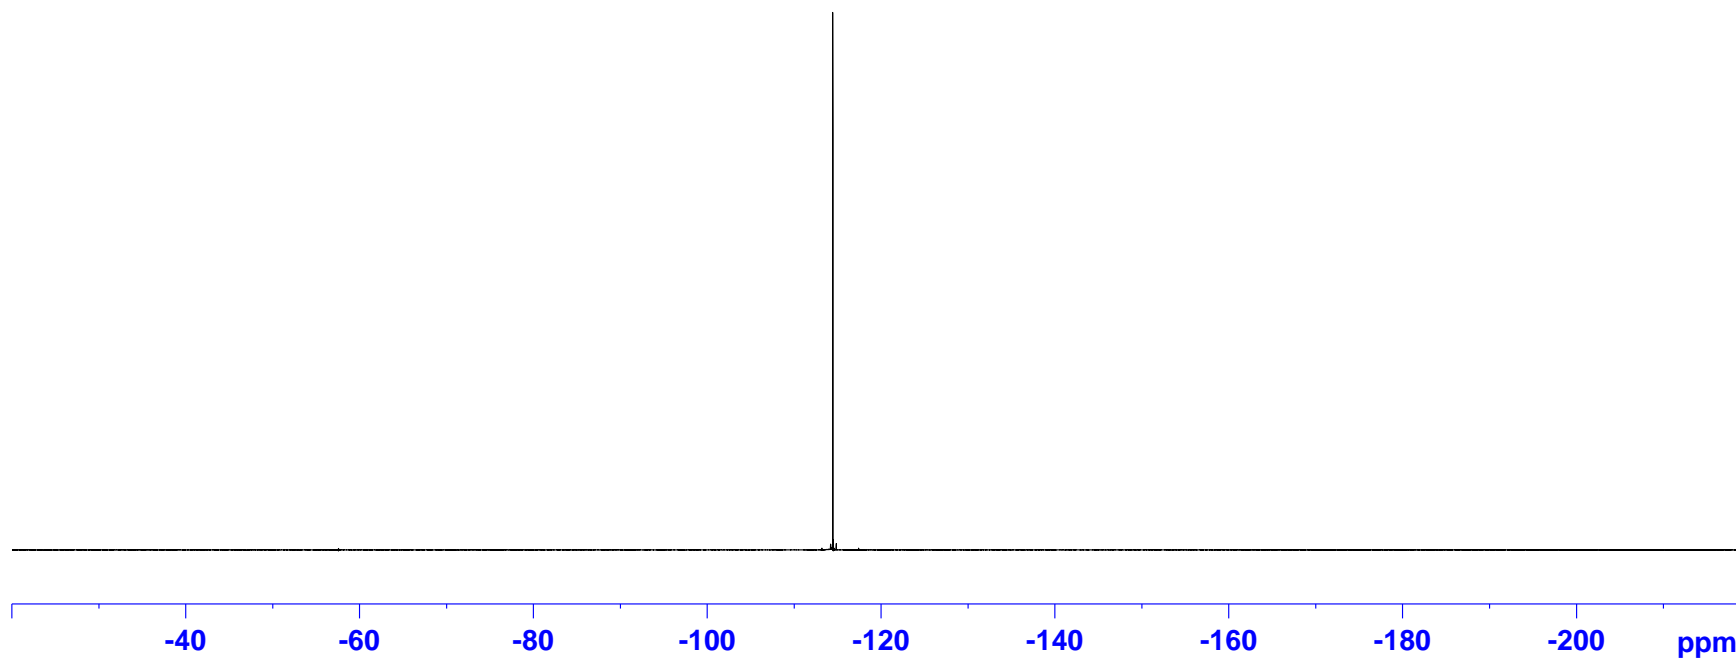

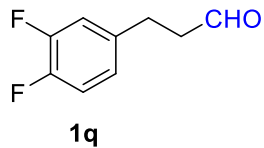

9.812  
7.286  
7.103  
7.082  
7.077  
7.061  
7.056  
7.036  
7.018  
7.012  
7.003  
6.990  
6.984  
6.931  
6.926  
6.921  
6.916  
6.910  
6.905  
6.900

2.942  
2.923  
2.905  
2.807  
2.788  
2.770

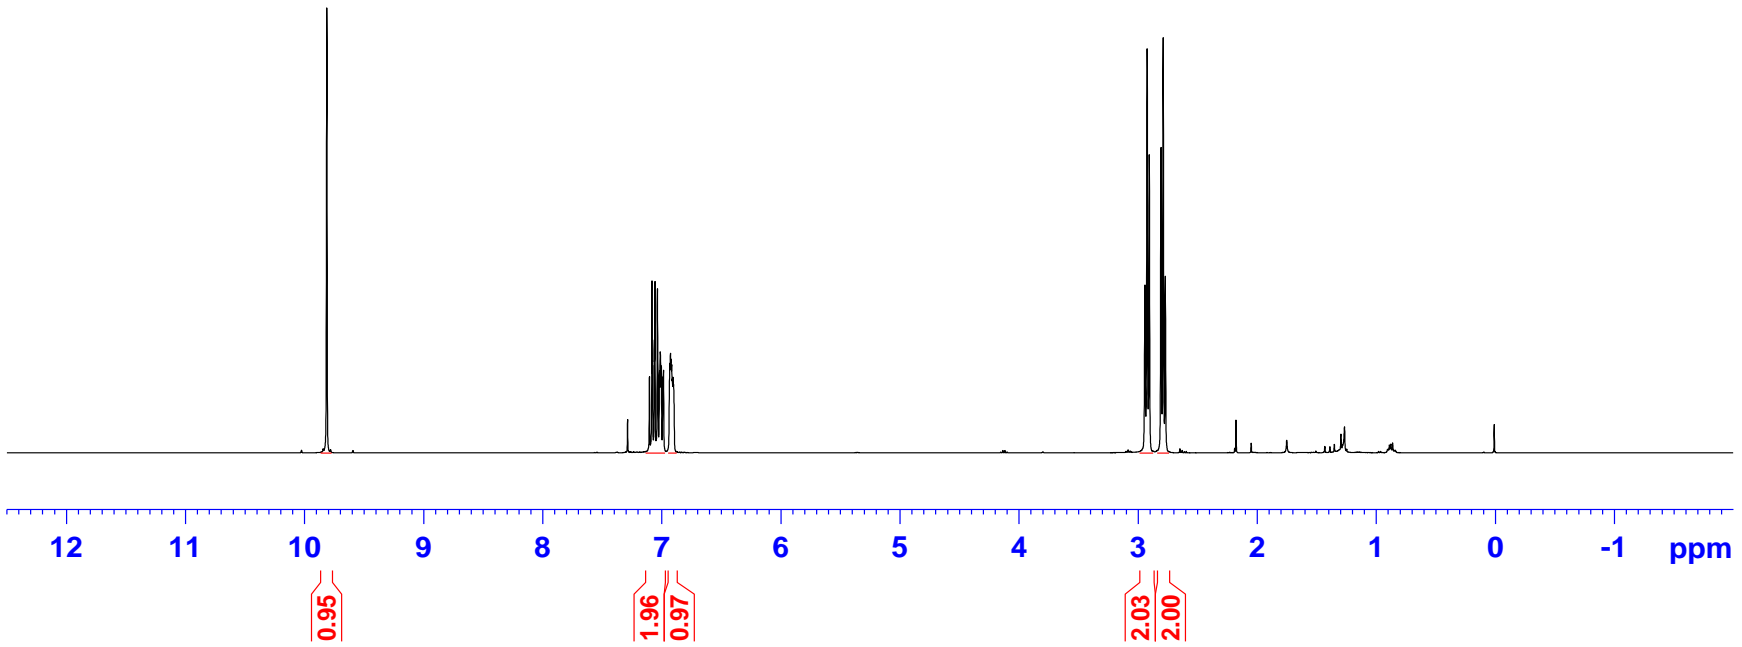

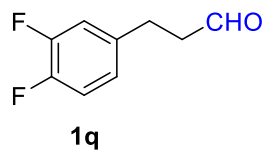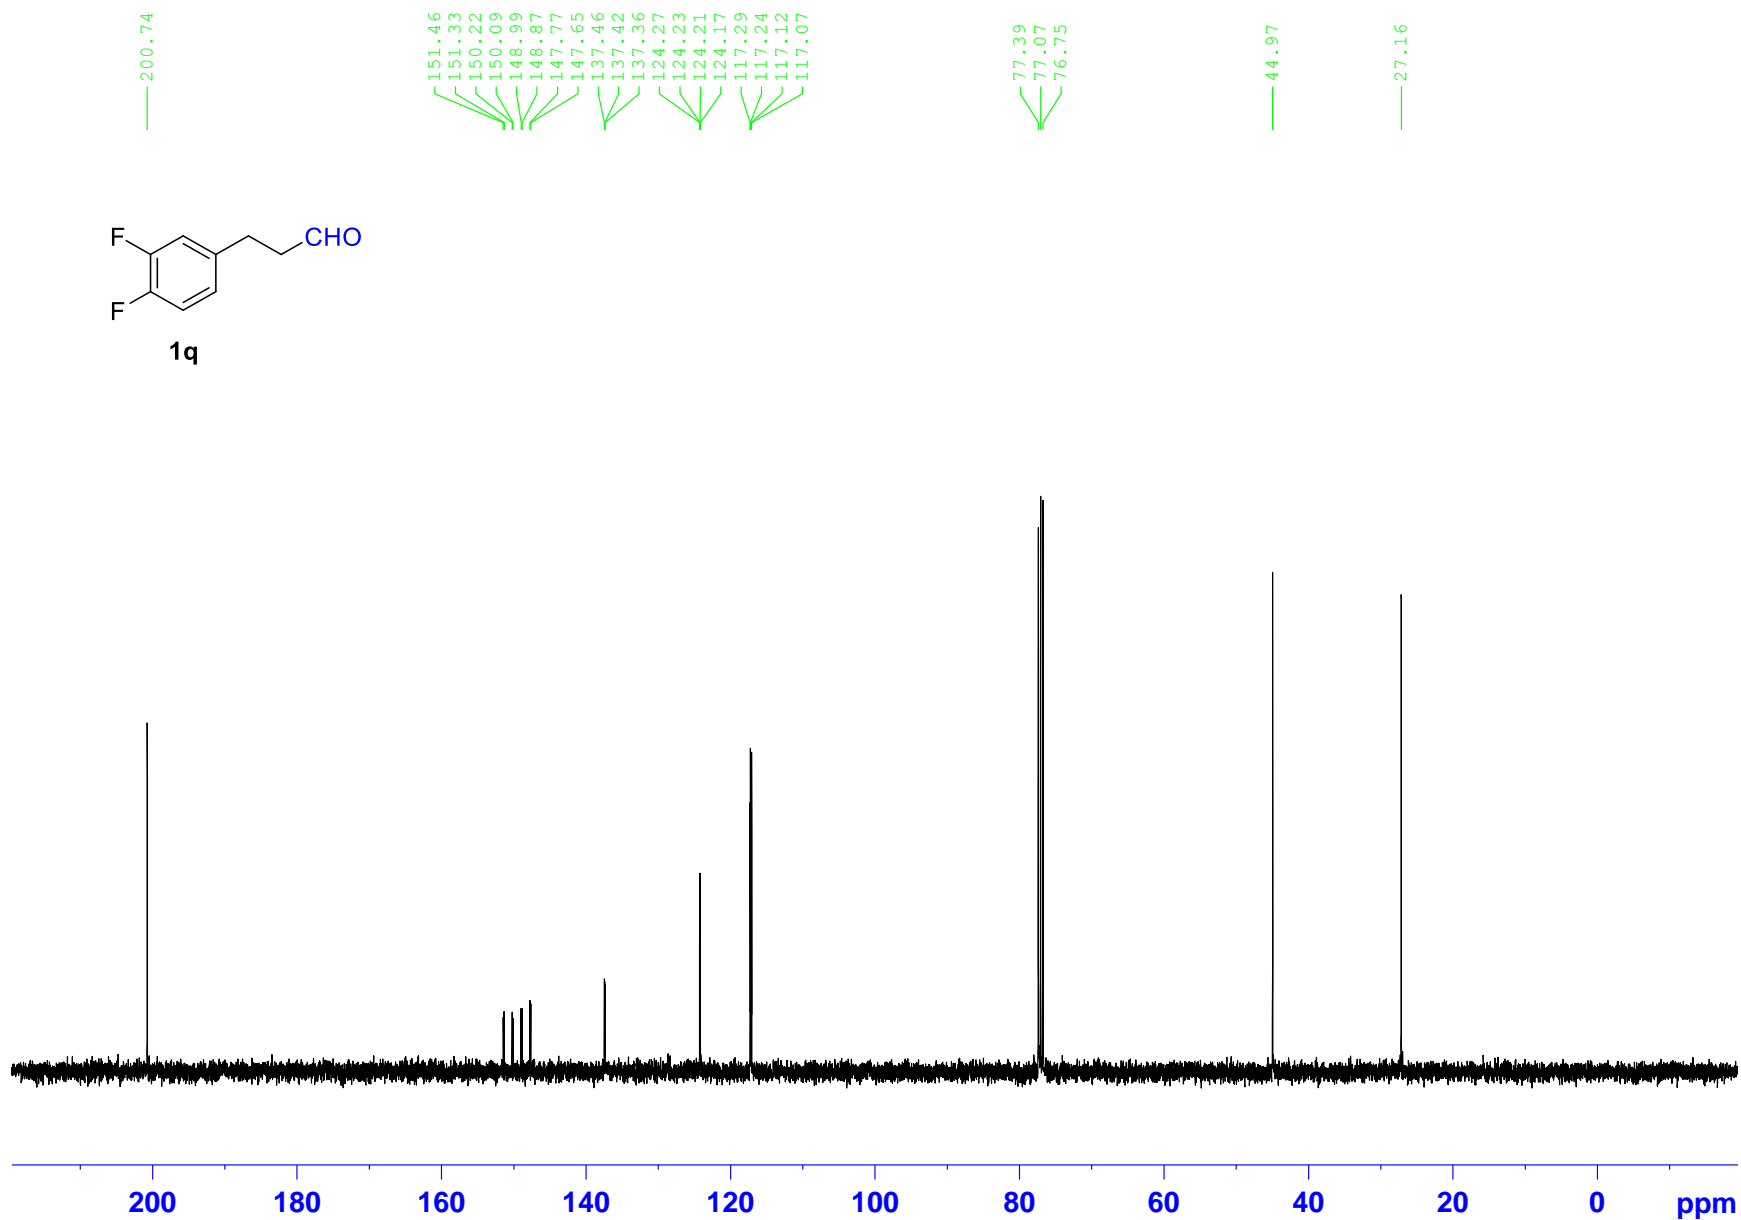

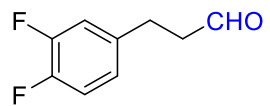

1q

-137.975  
-138.032  
-141.611  
-141.669

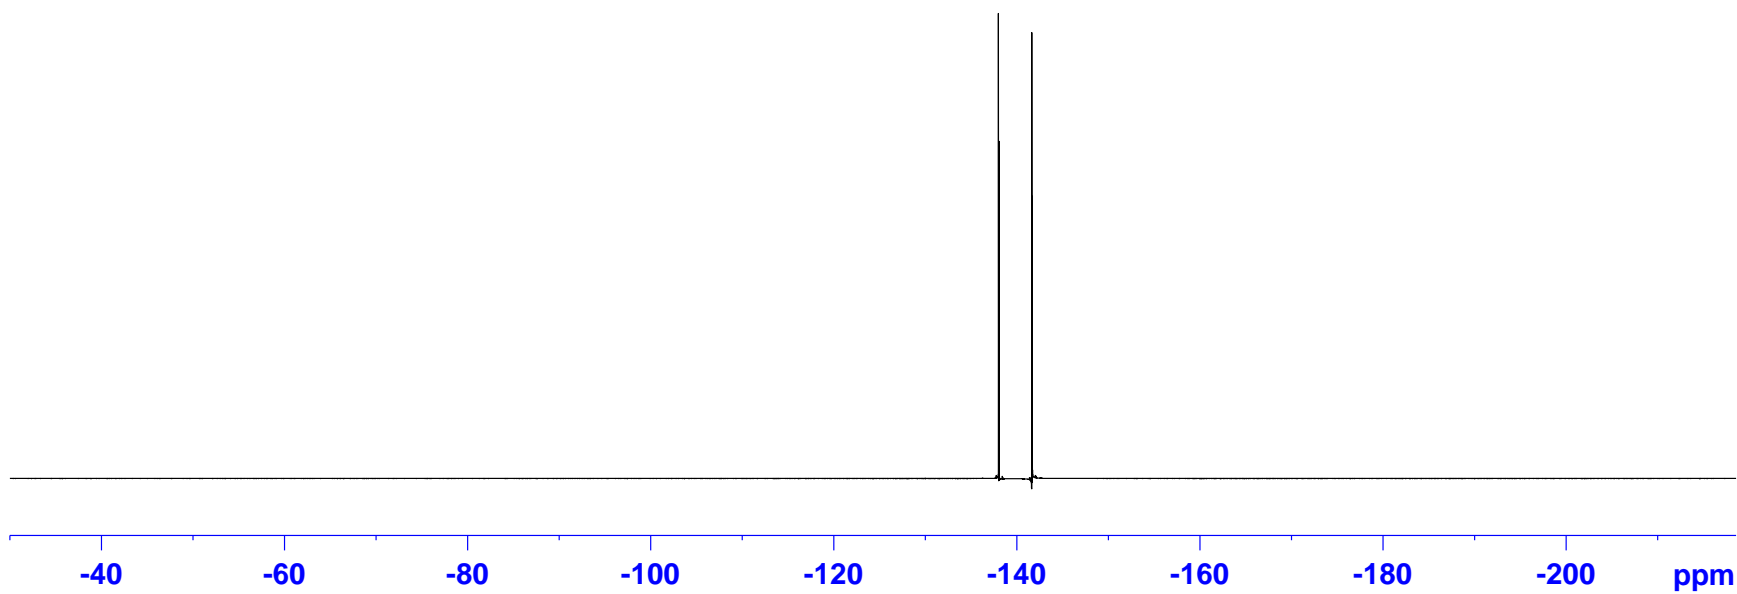

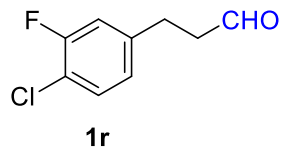

— 9.792

7.296  
7.276  
7.256  
6.996  
6.991  
6.971  
6.966  
6.939  
6.918  
6.915

2.936  
2.918  
2.899  
2.803  
2.784  
2.766

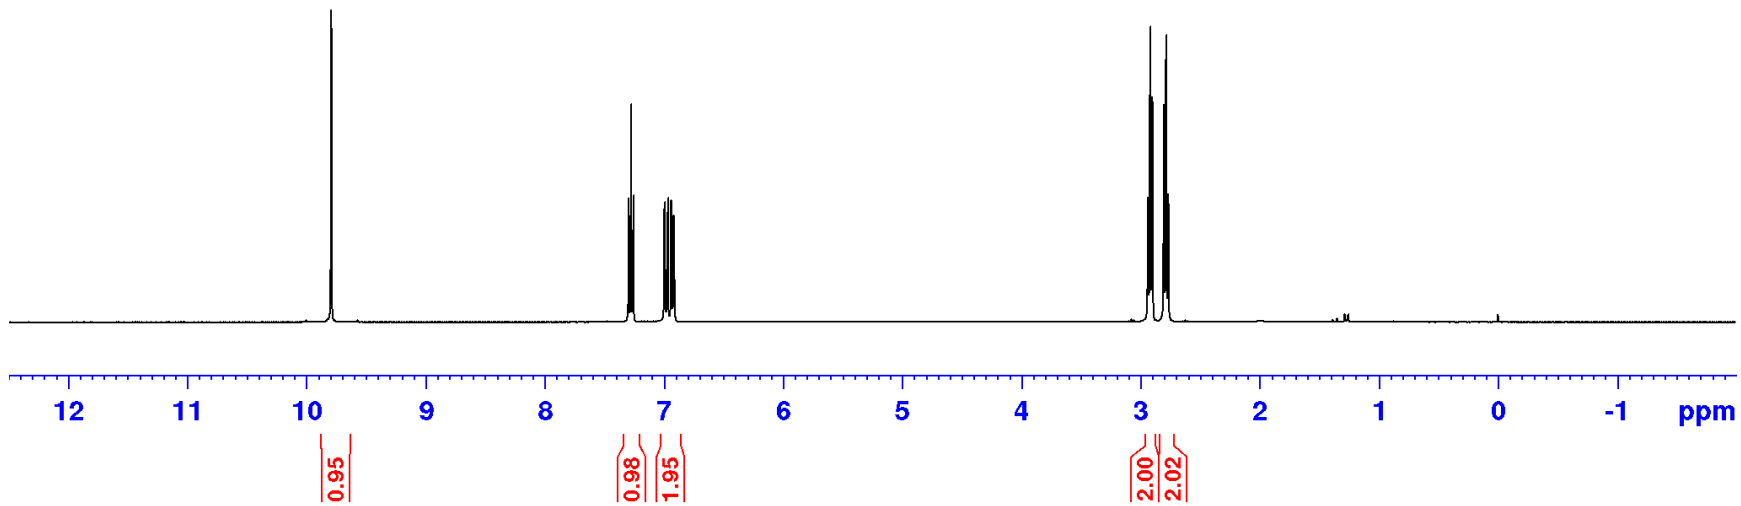



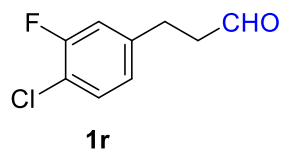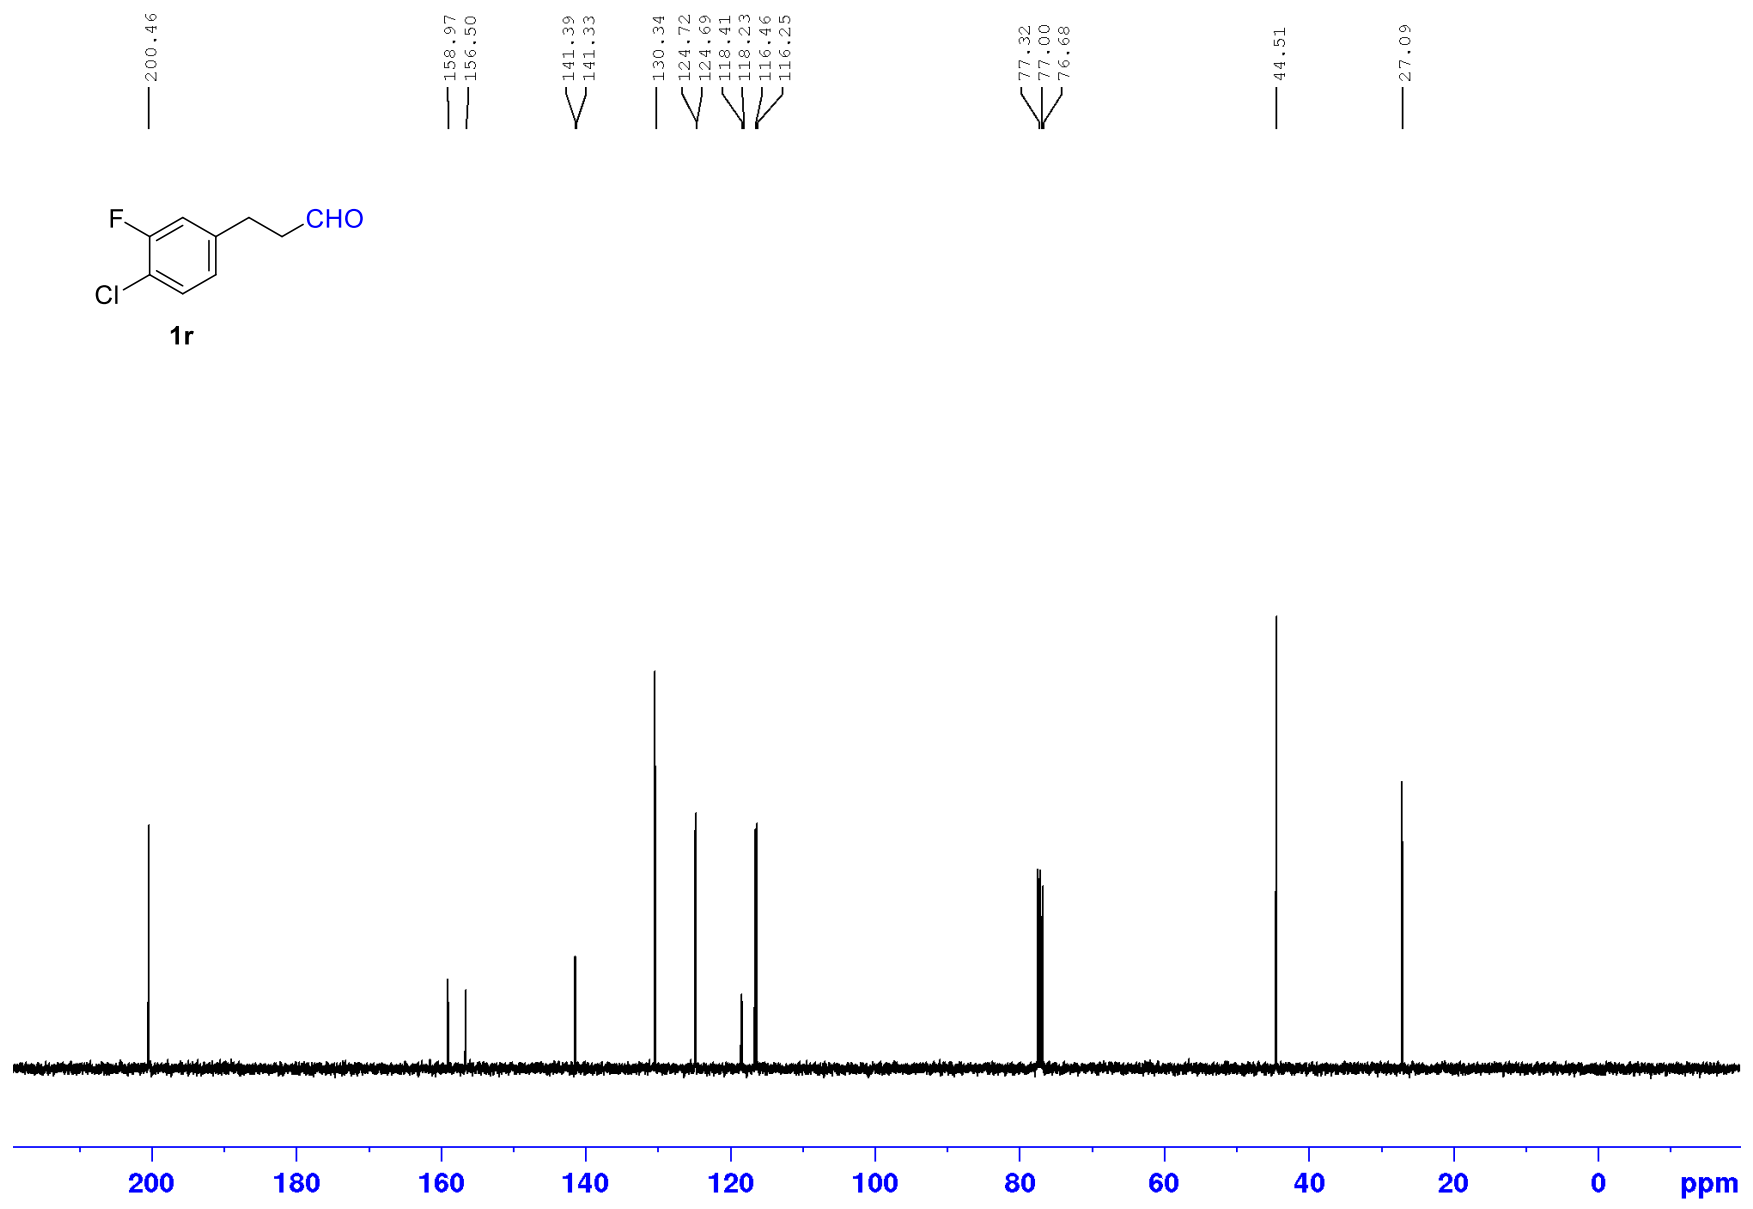

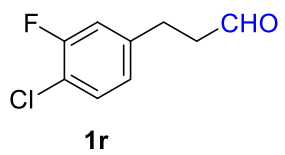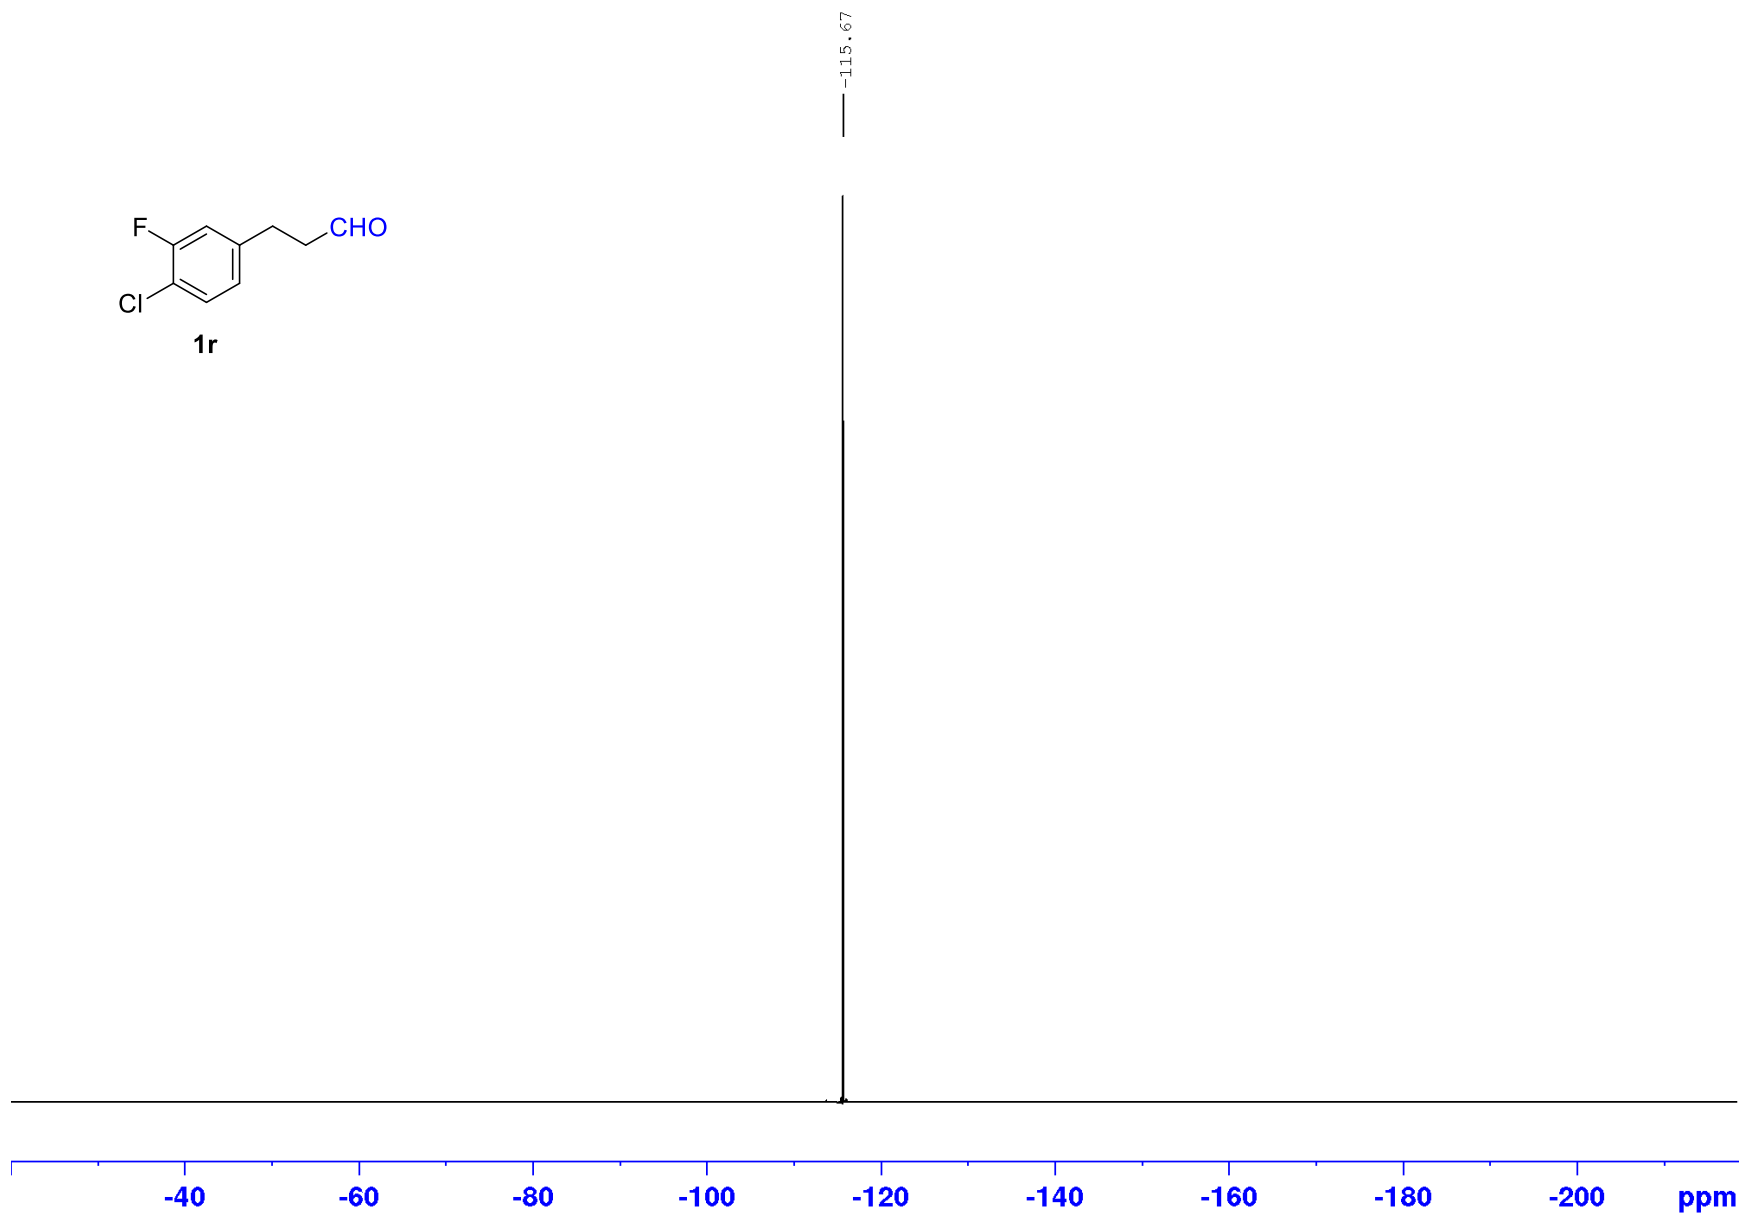

S154

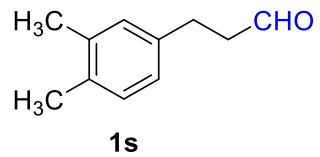

9.780

7.051  
7.032  
6.954  
6.921  
6.902

2.894  
2.875  
2.856  
2.743  
2.741  
2.724  
2.704  
2.225  
2.212

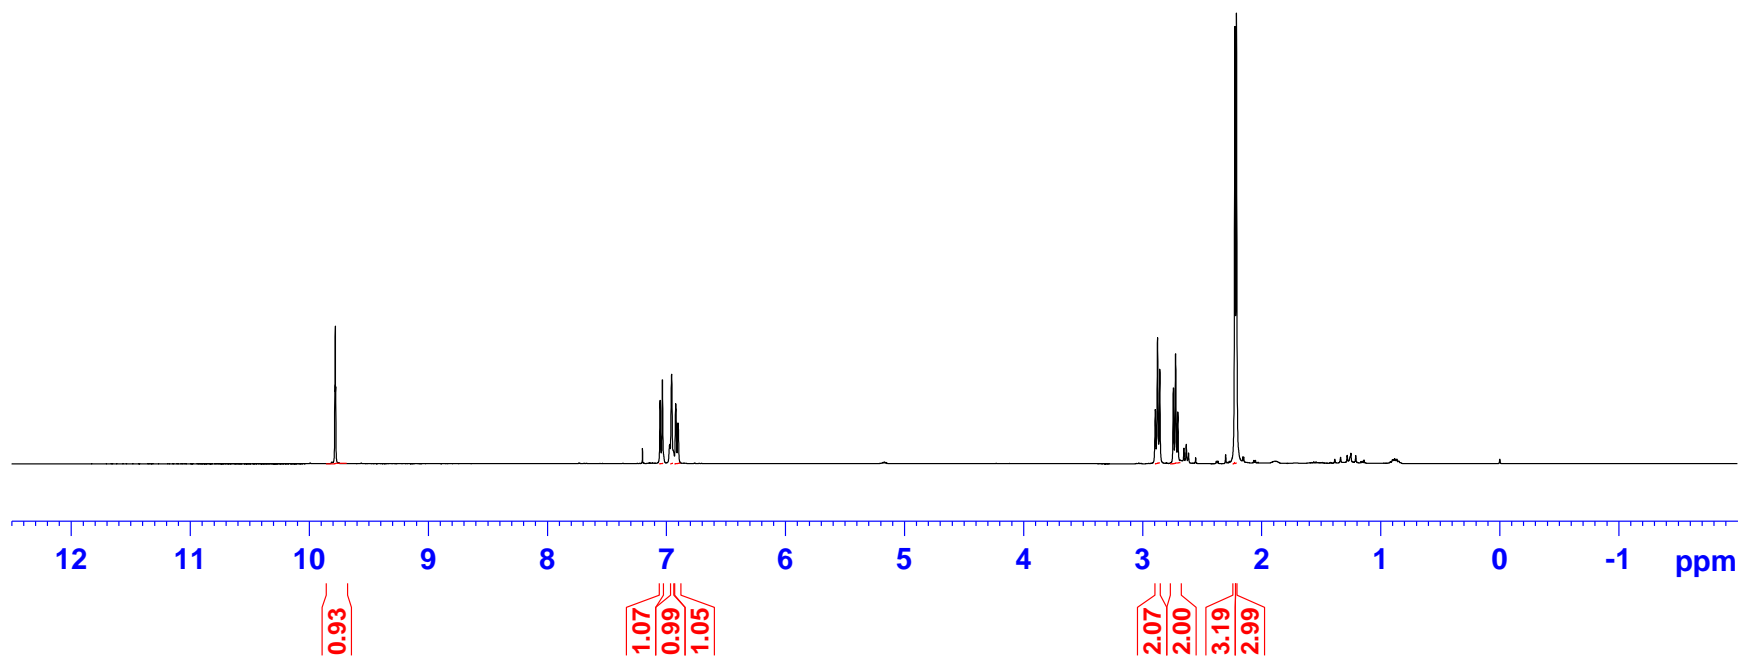

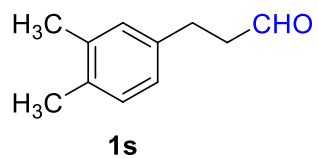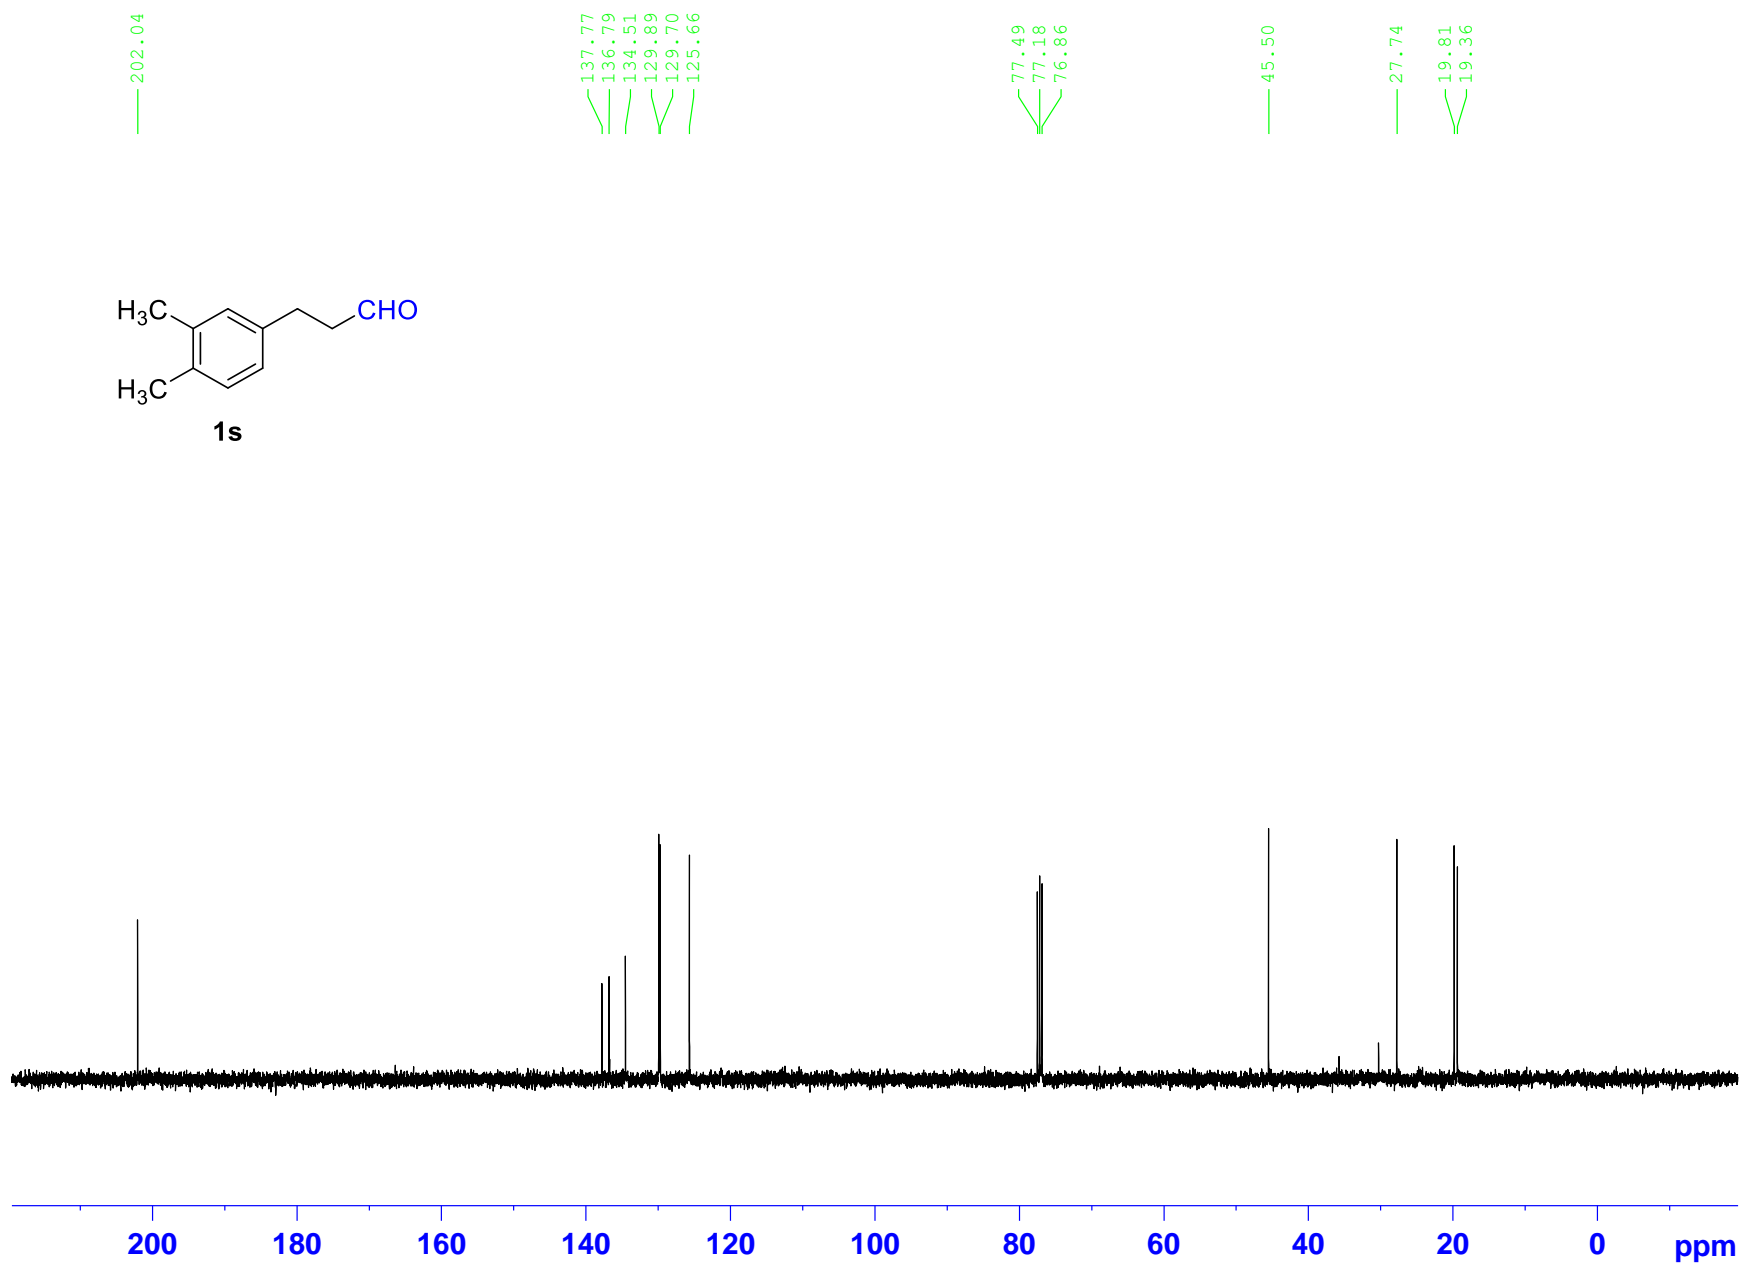

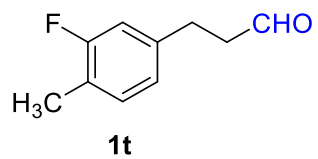

9.828

7.132  
7.111  
7.092  
6.894  
6.877  
6.854

2.955  
2.936  
2.917  
2.802  
2.783  
2.765  
2.257

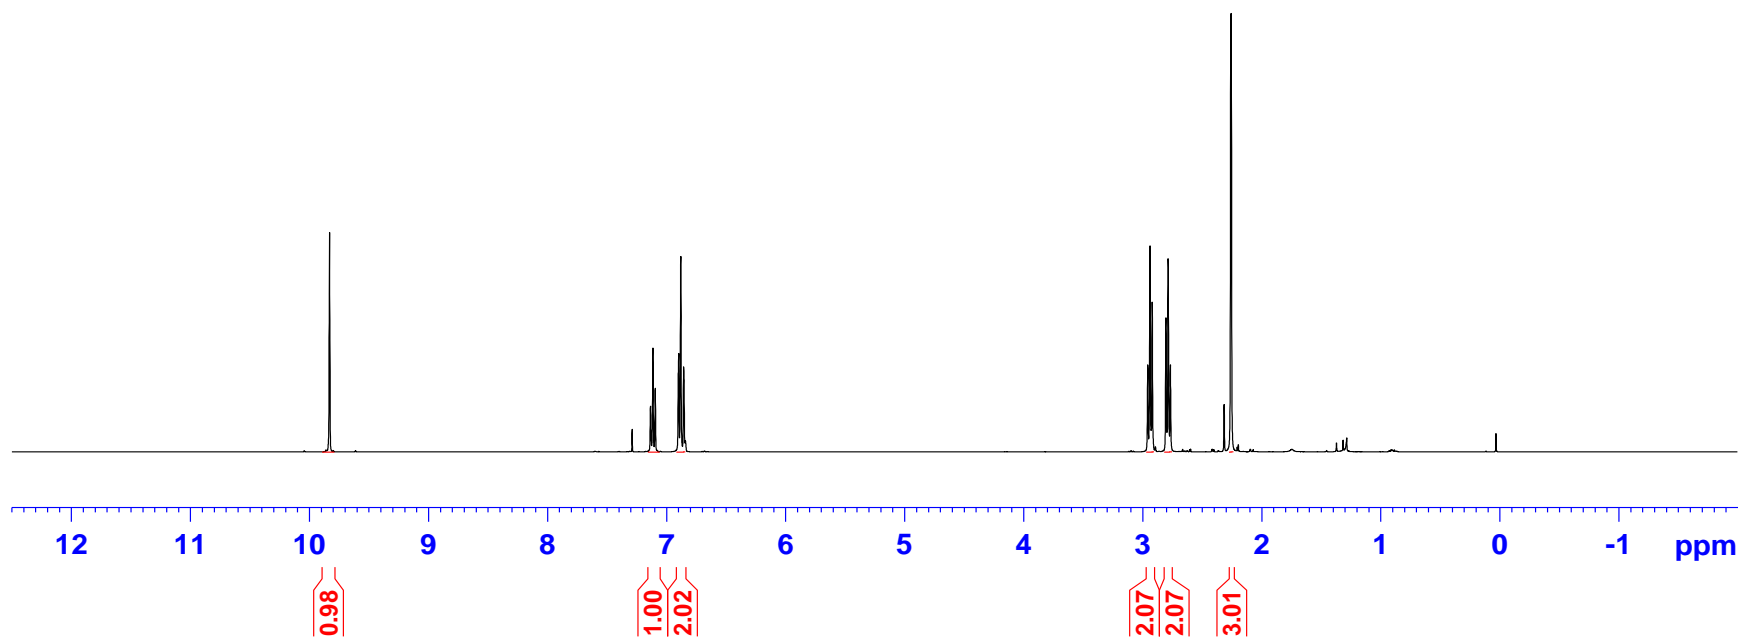

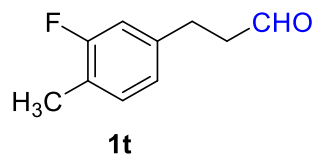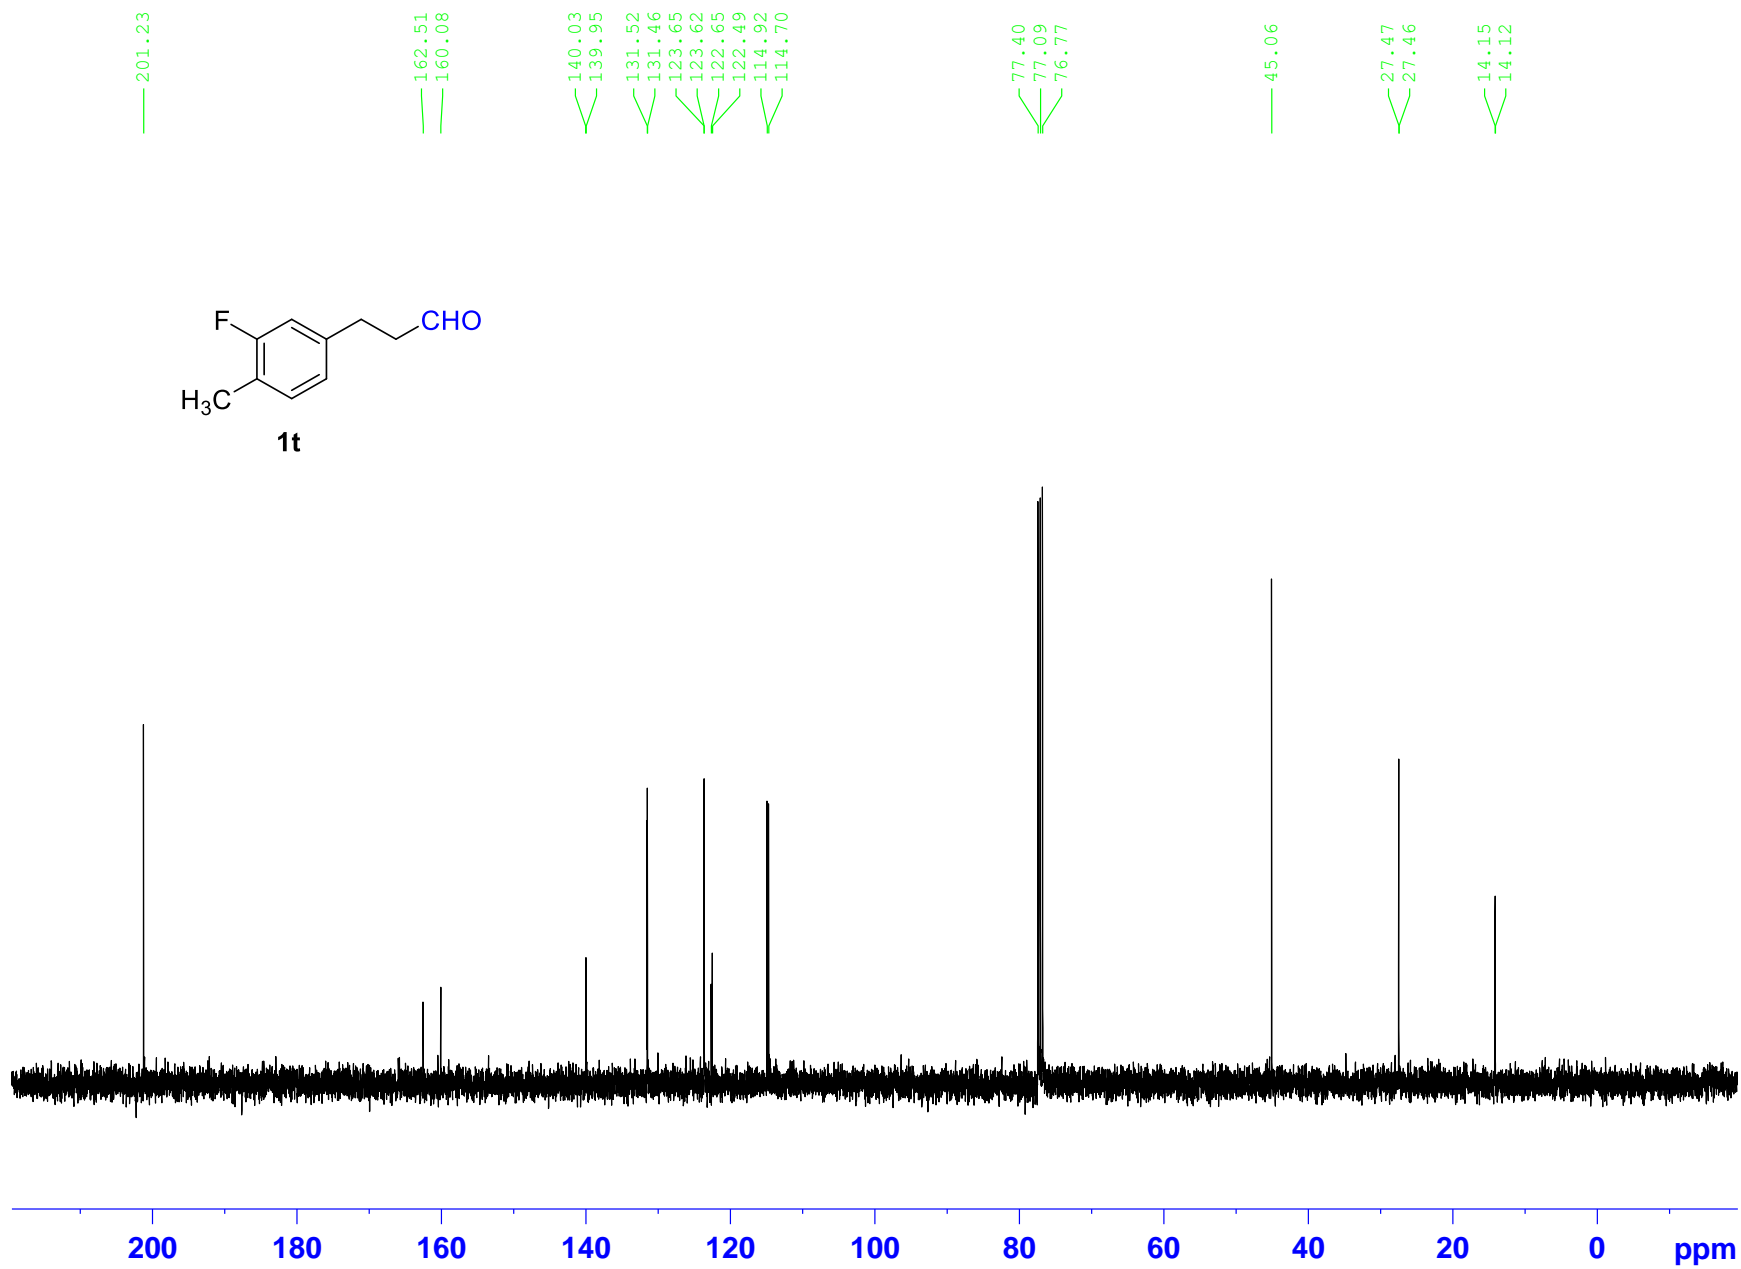

S158

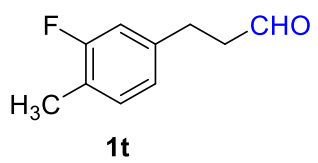

— -117.584

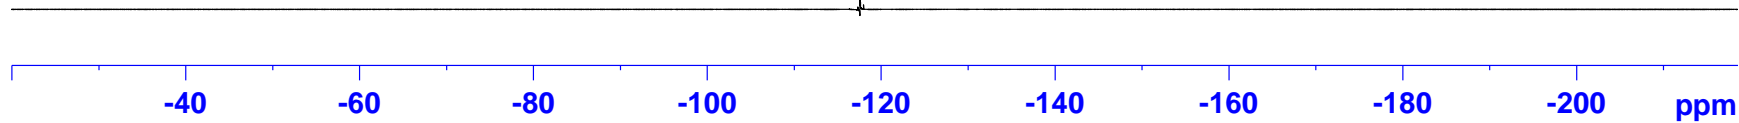

S159

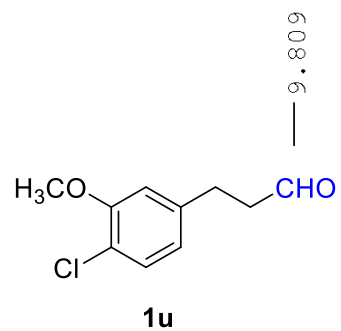

7.265  
7.245  
6.771  
6.767  
6.733  
6.729  
6.713  
6.709

3.883  
2.945  
2.927  
2.908  
2.803  
2.784  
2.766

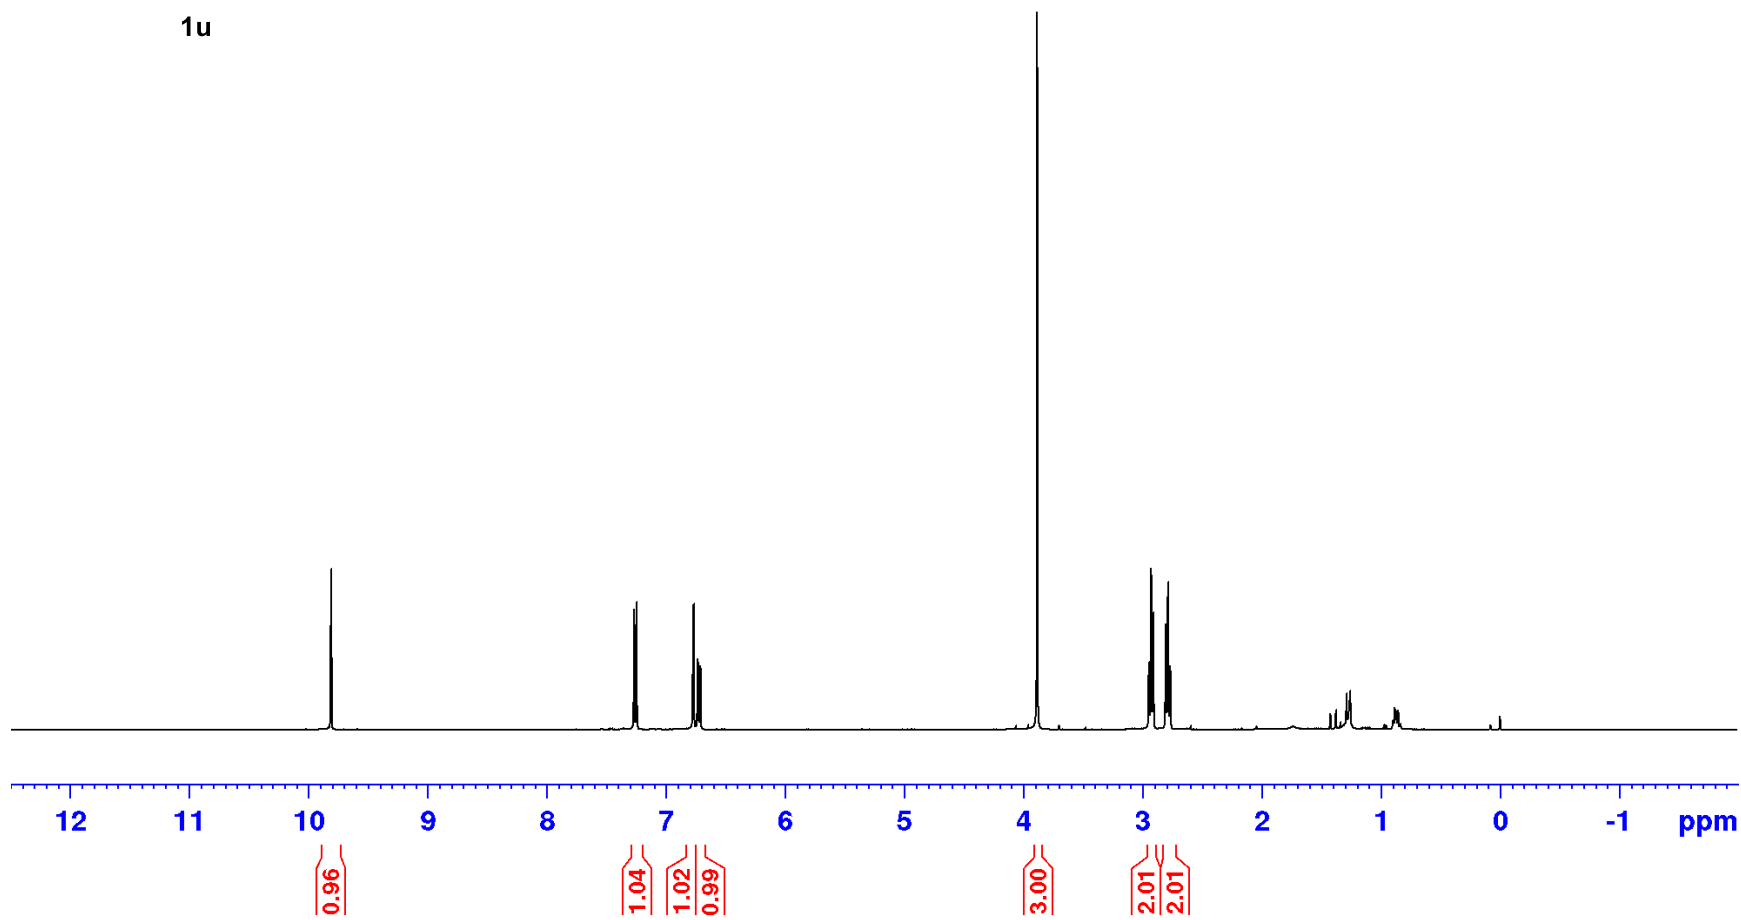



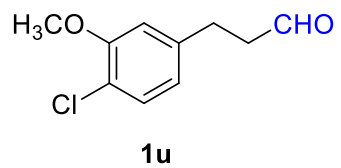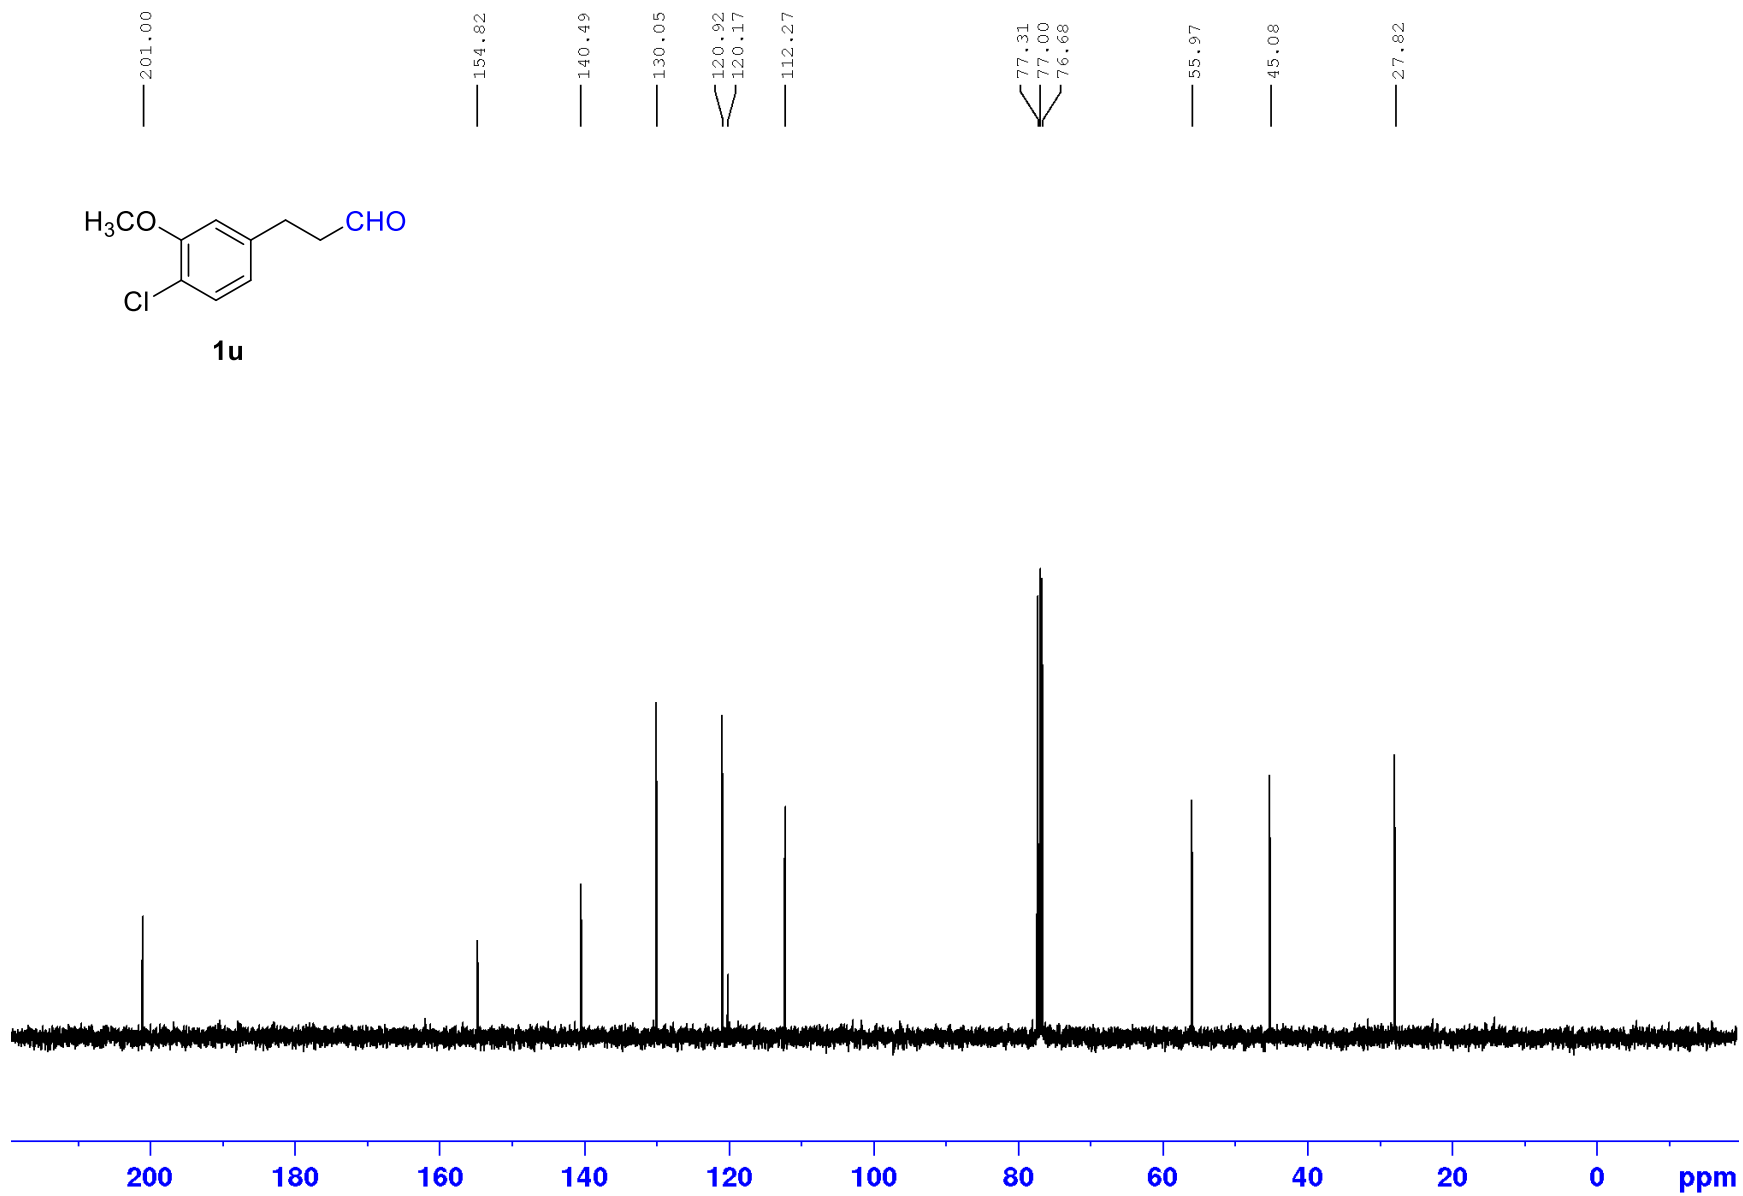

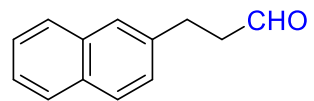

1v

9.724  
7.766  
7.747  
7.743  
7.734  
7.714  
7.551  
7.439  
7.436  
7.422  
7.419  
7.404  
7.401  
7.387  
7.383  
7.370  
7.366  
7.257  
7.253  
7.236  
7.232

3.035  
3.017  
2.998  
2.746  
2.744  
2.727  
2.724  
2.709  
2.706

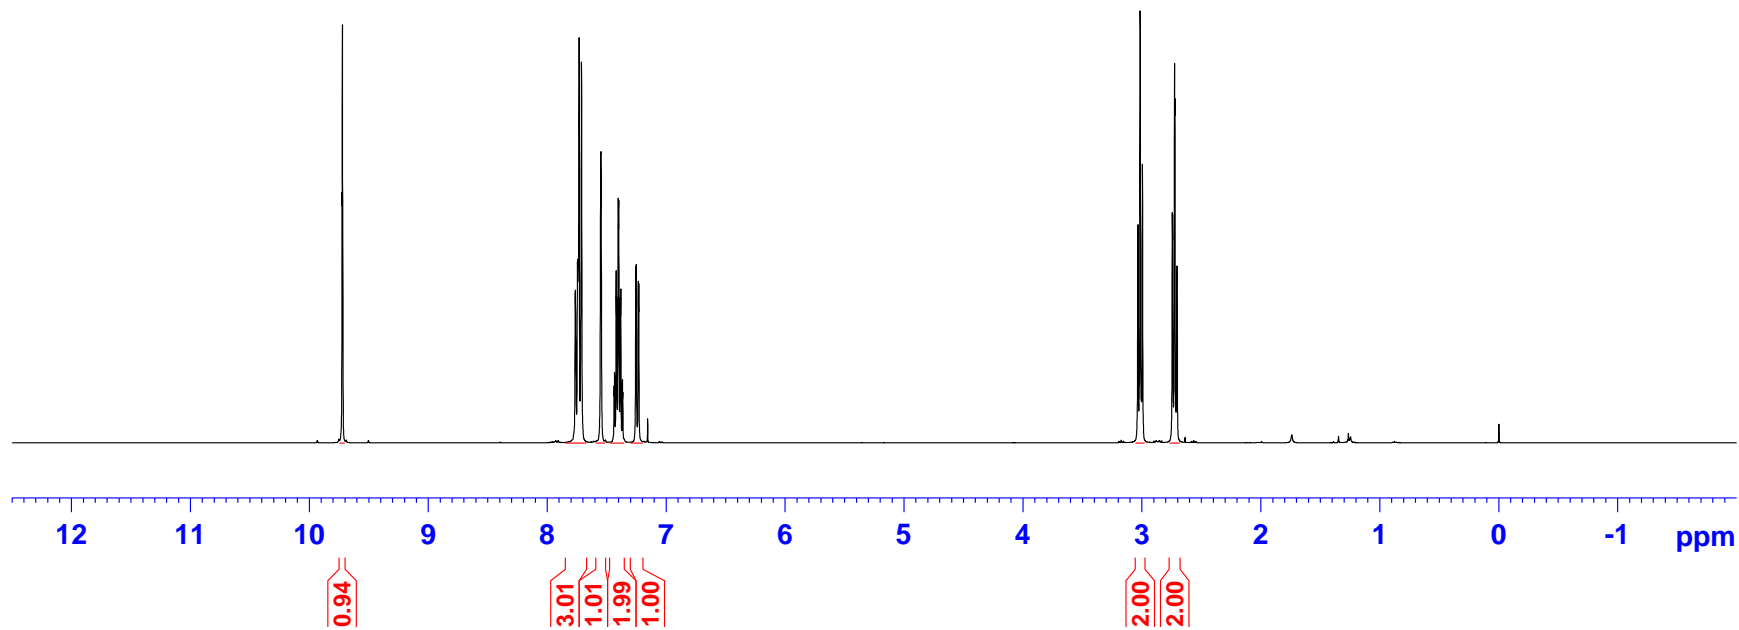

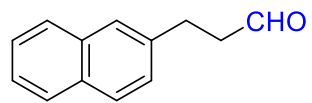

1v

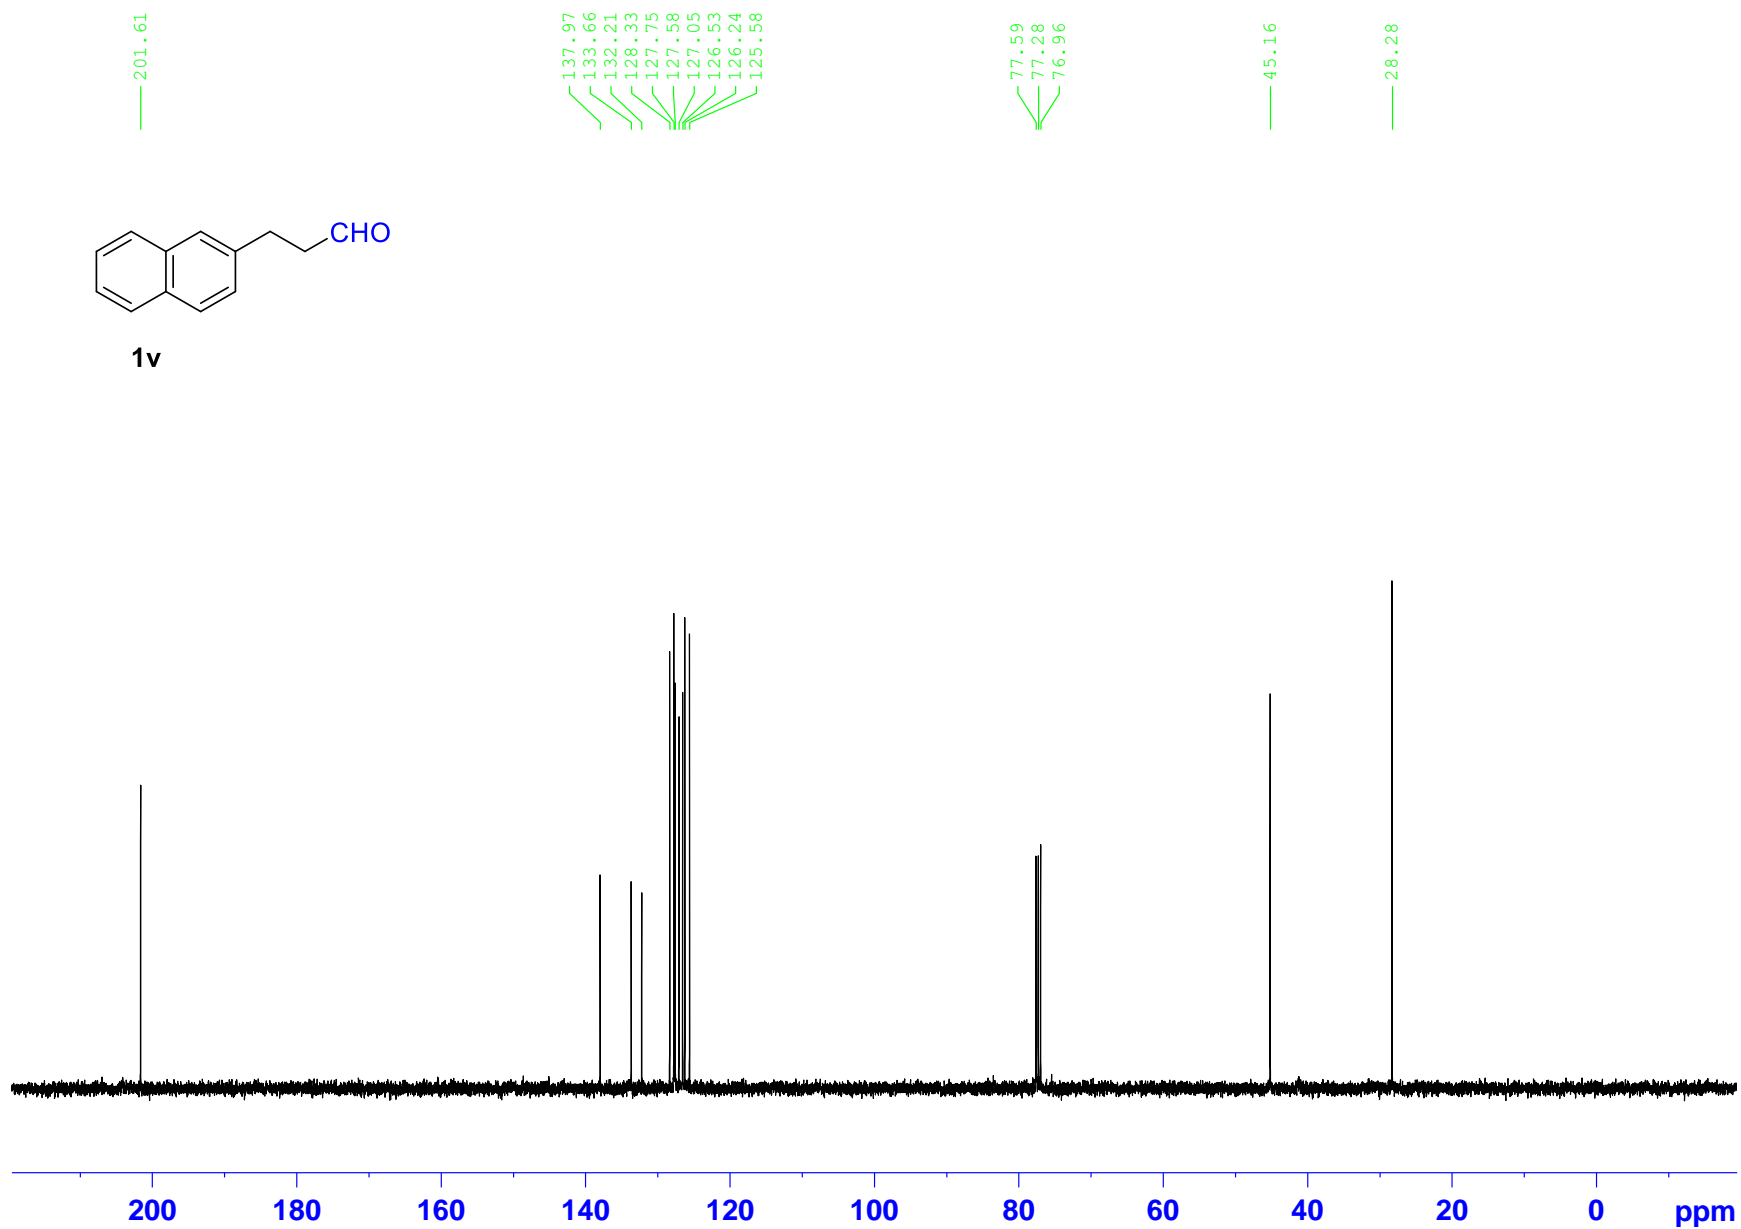

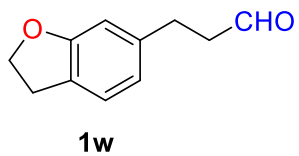

— 9.830

7.286  
7.051  
6.953  
6.933  
6.737  
6.716

4.587  
4.566  
4.544  
3.219  
3.198  
3.176  
2.930  
2.911  
2.893  
2.777  
2.758  
2.740

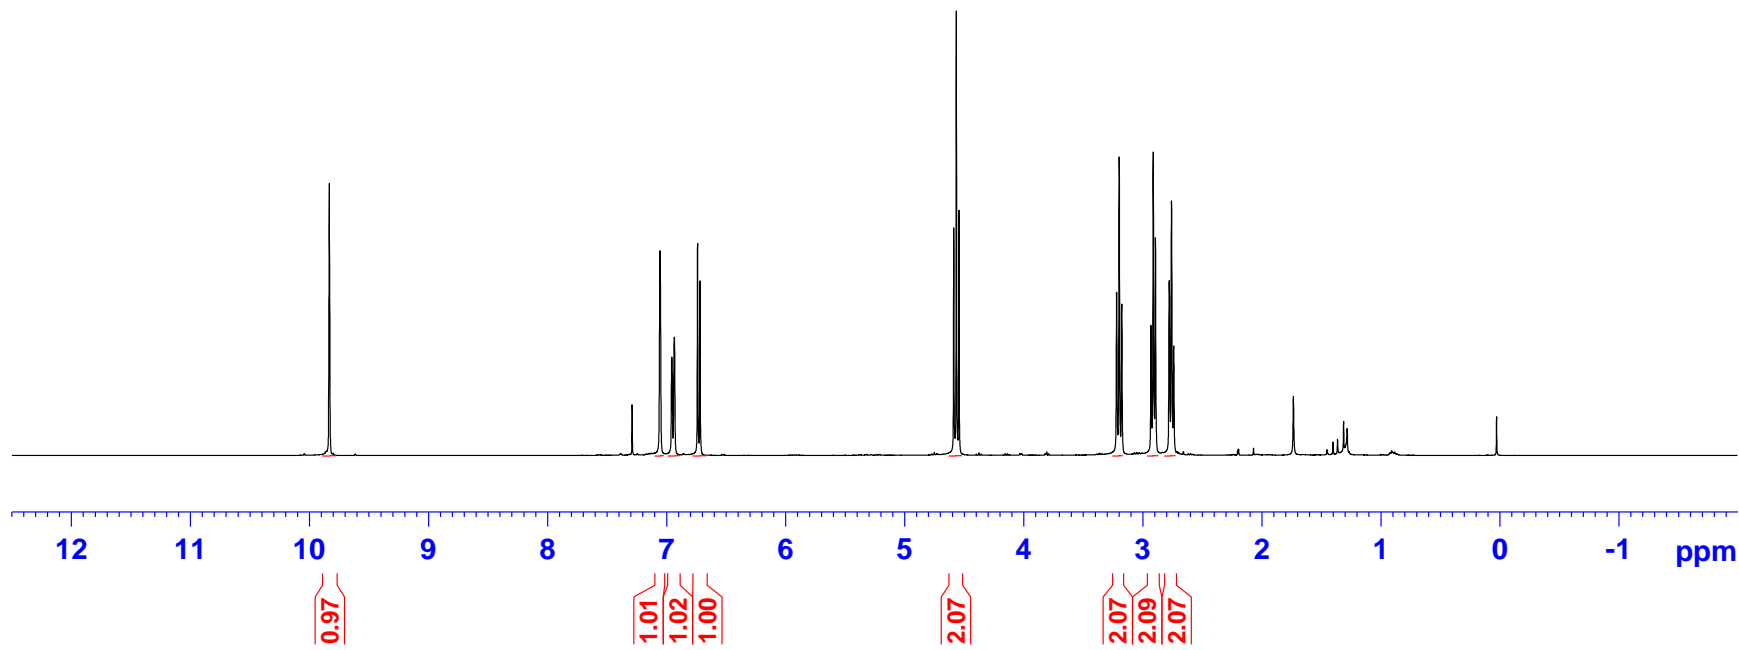

201.97

158.60

132.25

127.71

127.34

124.88

109.17

77.40

77.09

76.77

71.21

45.82

29.77

27.61

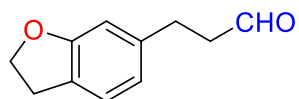

1w

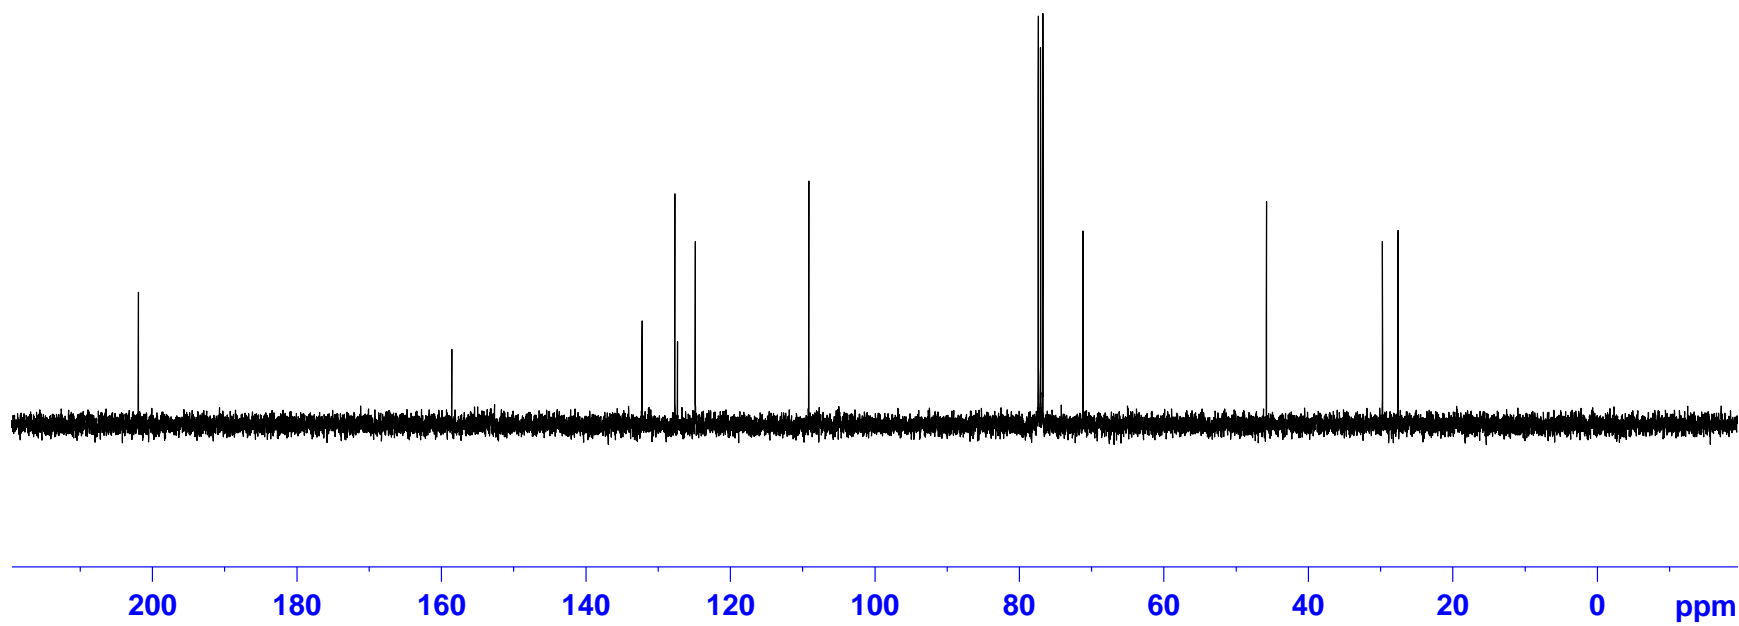

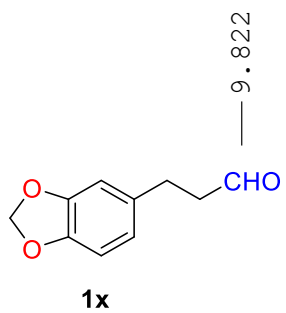

7.286  
6.760  
6.740  
6.698  
6.669  
6.650  
5.942

2.917  
2.898  
2.880  
2.773  
2.754  
2.736

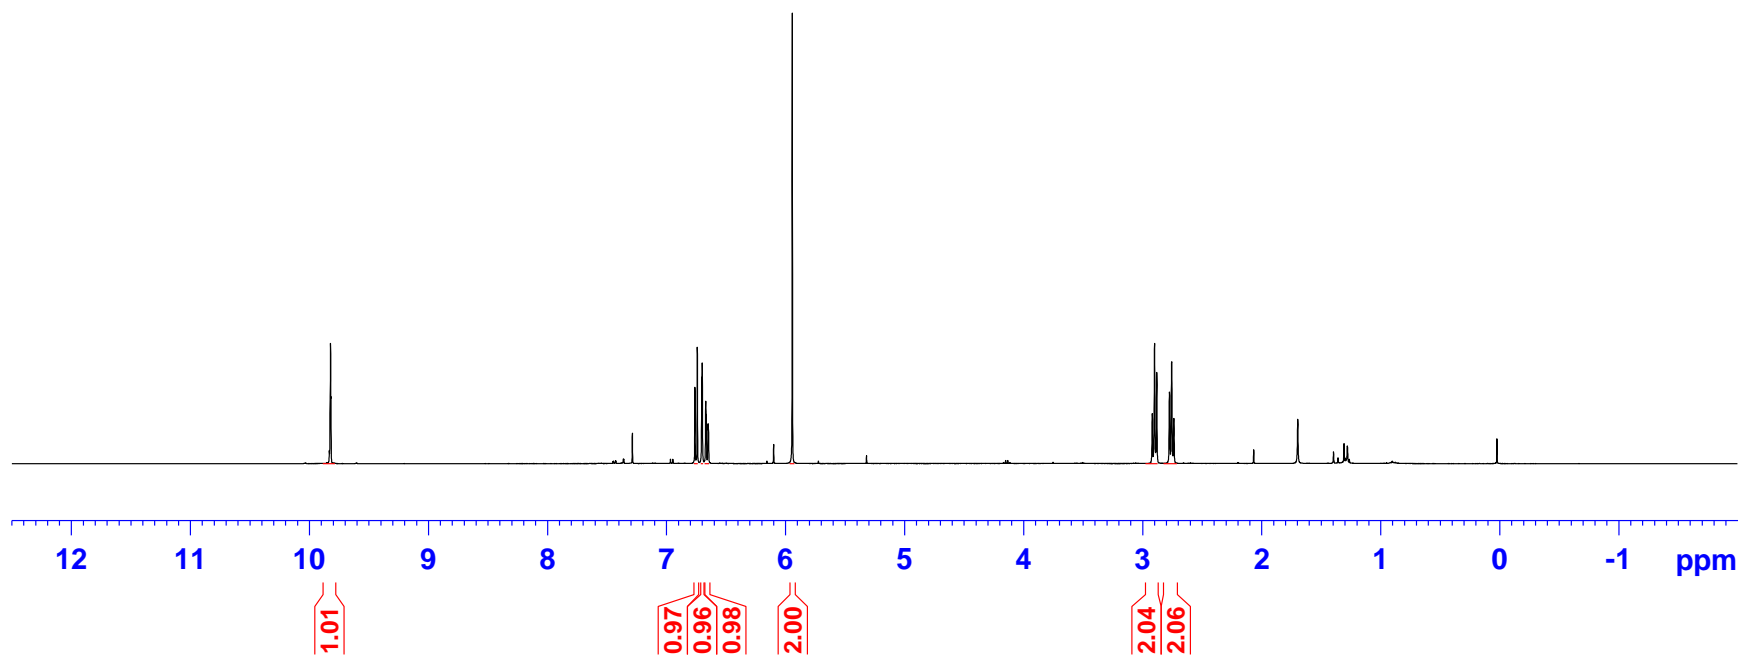

S166

201.60

147.75  
145.99

134.10

121.09

108.78  
108.33

100.90

77.38  
77.06  
76.74

45.55

27.89

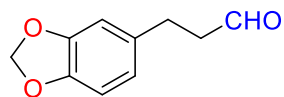

1x

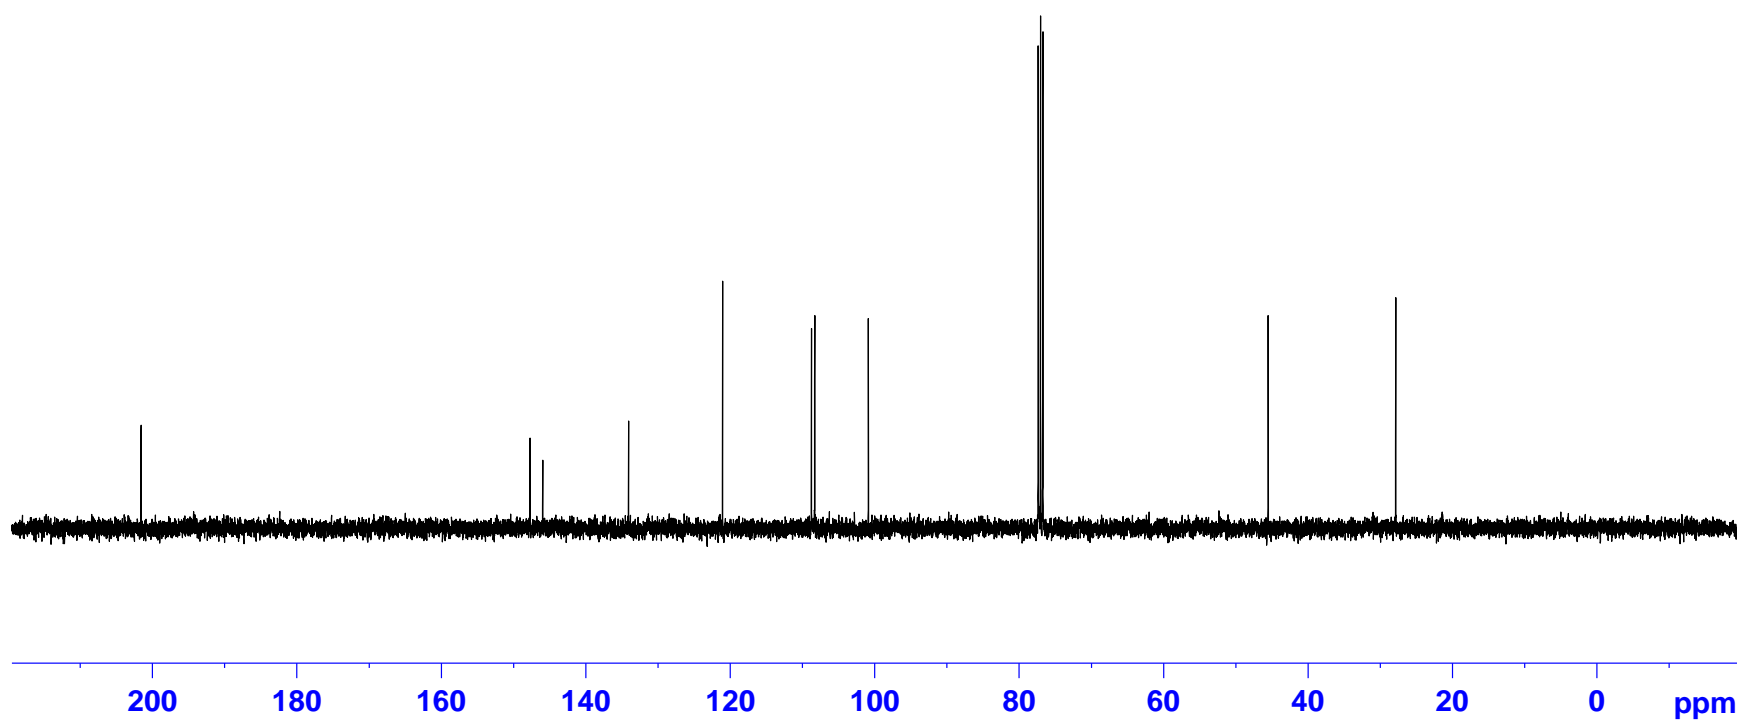

S167

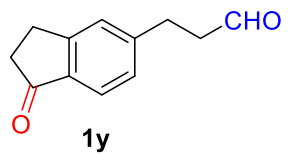

— 9.852

7.712  
7.693  
7.329  
7.286  
7.234  
7.215

3.142  
3.127  
3.112  
3.074  
3.056  
3.037  
2.877  
2.859  
2.840  
2.715  
2.700  
2.686

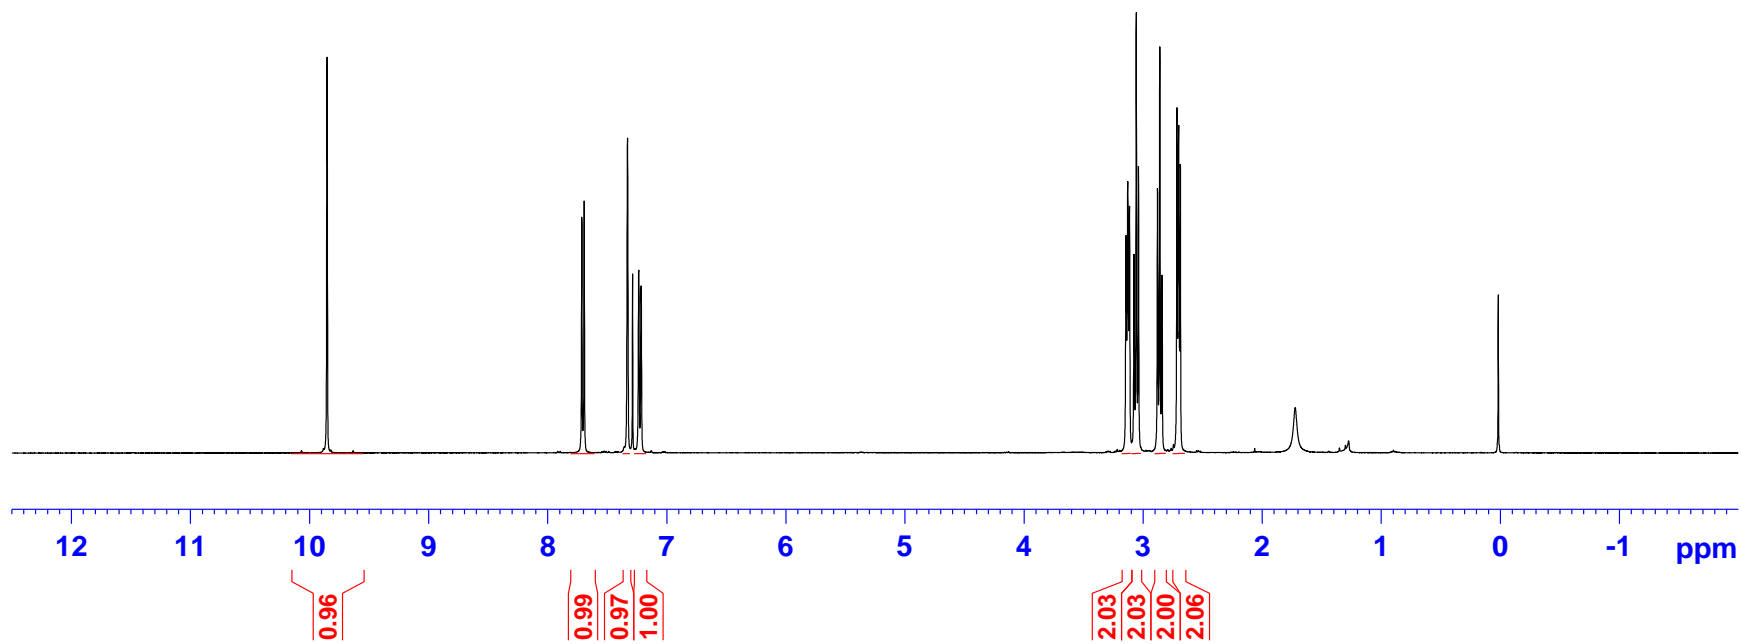



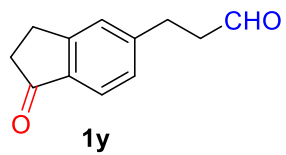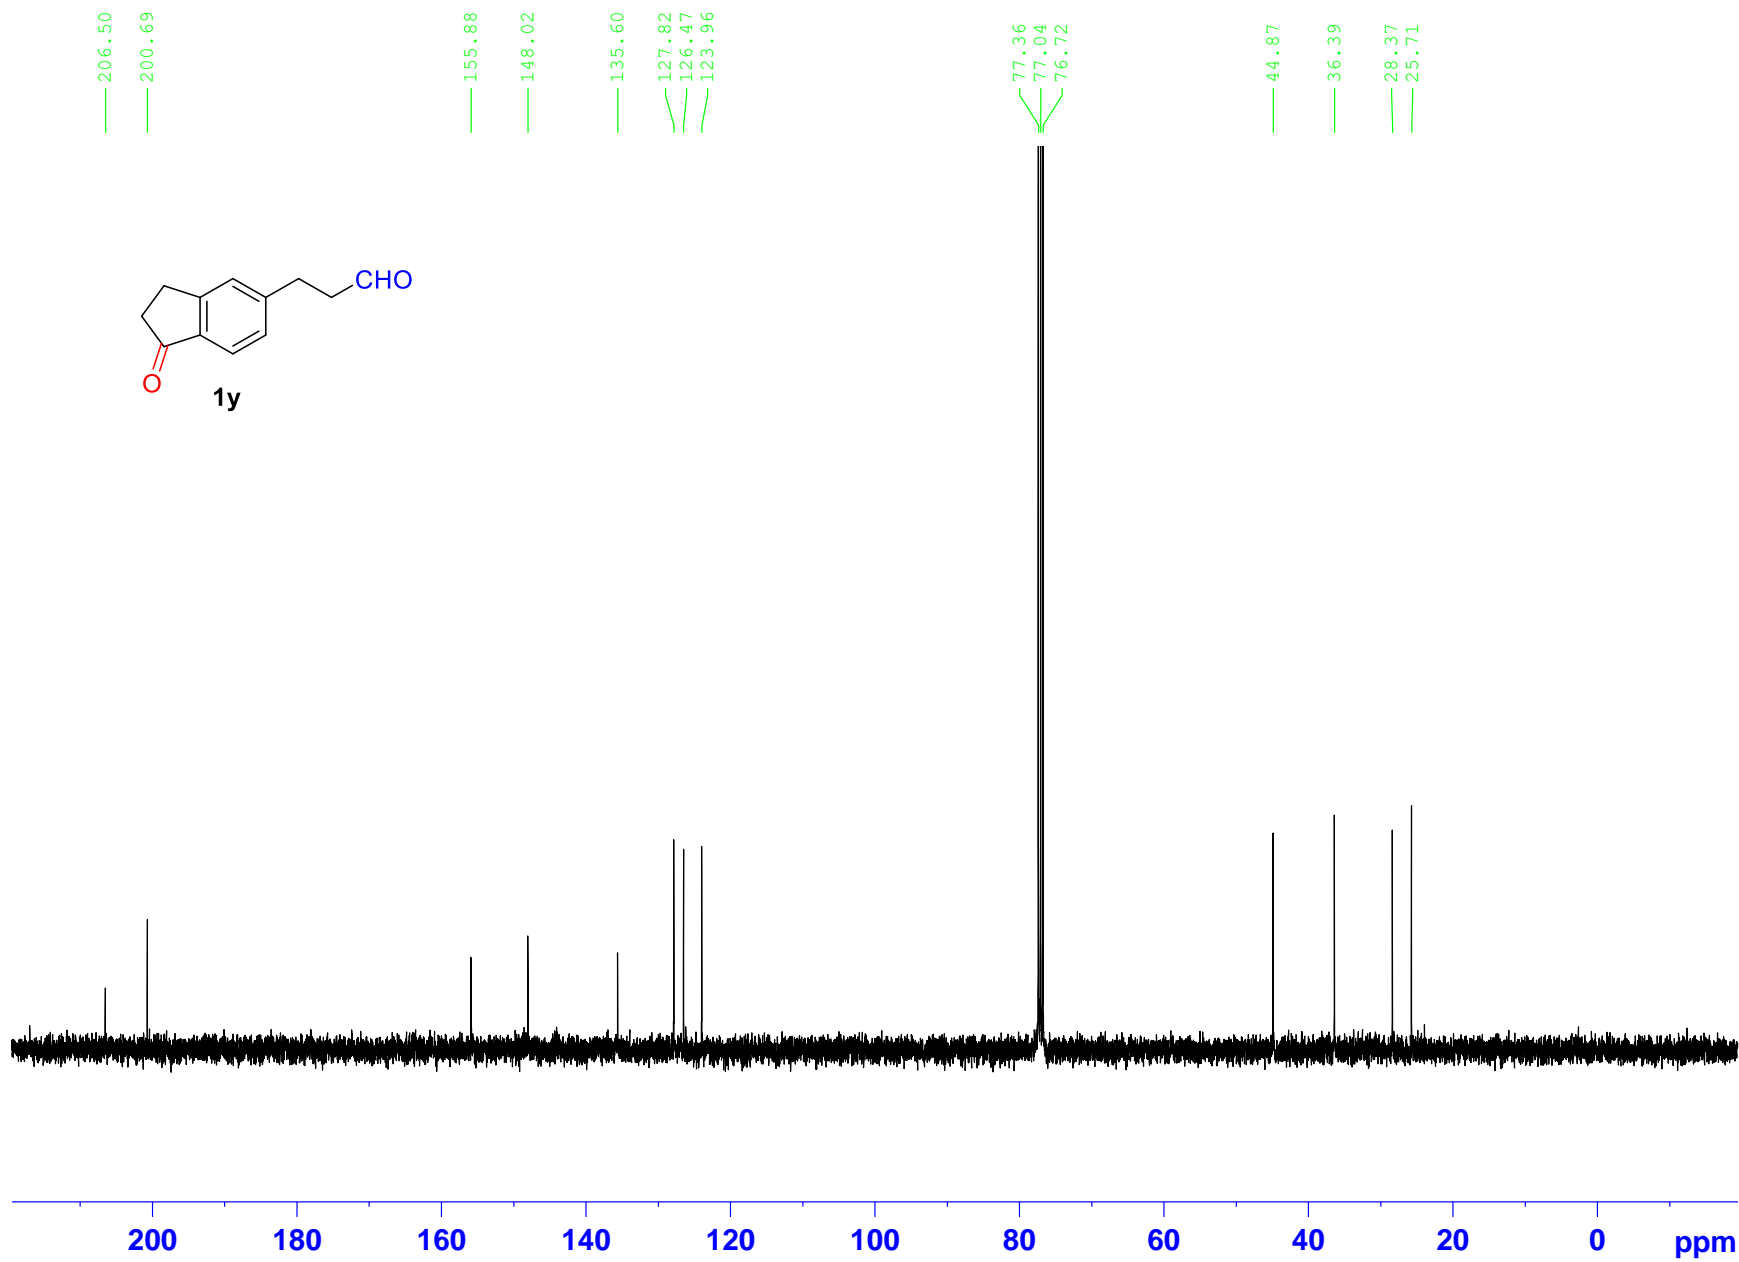

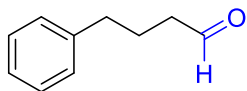

1z

— 9.720

7.294  
7.276  
7.257  
7.221  
7.202  
7.199  
7.184  
7.178  
7.168  
7.150

2.655  
2.636  
2.617  
2.441  
2.437  
2.423  
2.419  
2.404  
2.401  
1.976  
1.958  
1.939  
1.920  
1.902

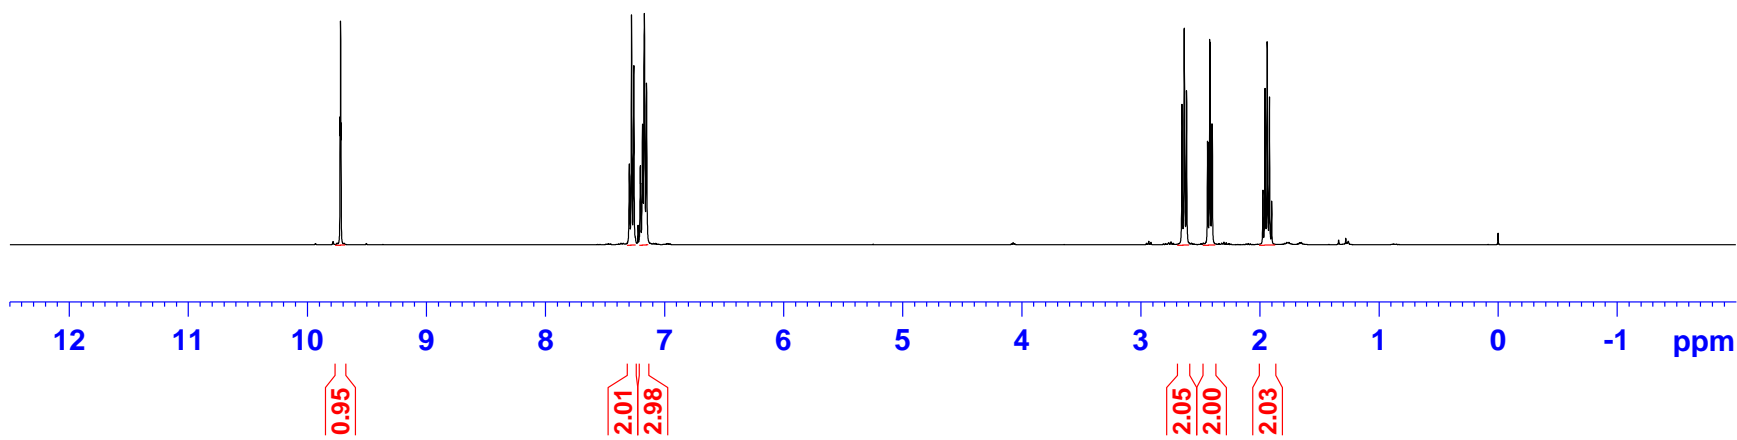

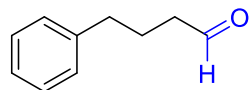

1z

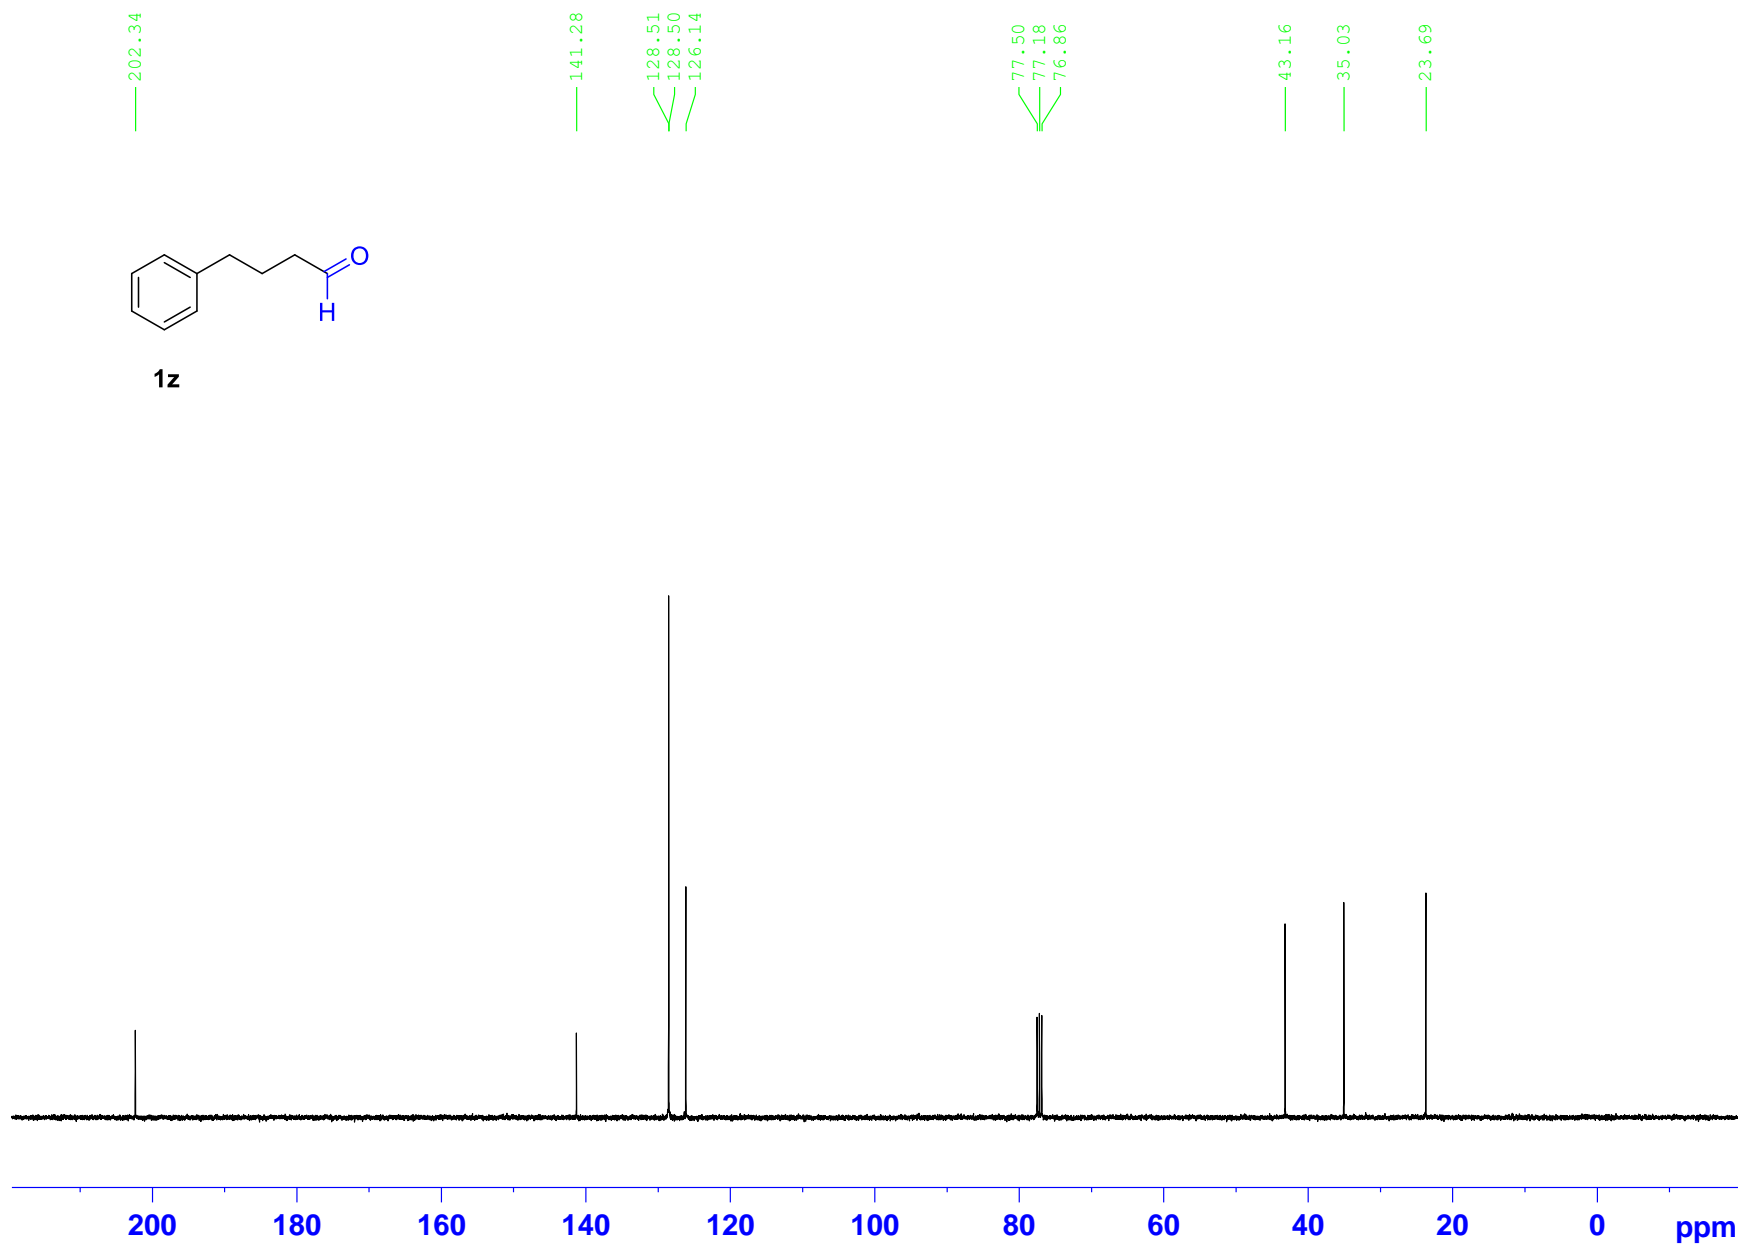

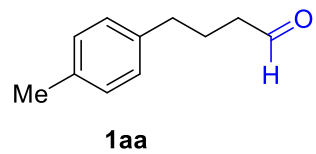

— 9.794

7.199  
7.179  
7.169  
7.159  
7.138

2.711  
2.692  
2.673  
2.515  
2.511  
2.497  
2.493  
2.478  
2.474  
2.408  
2.048  
2.029  
2.011  
1.992  
1.974

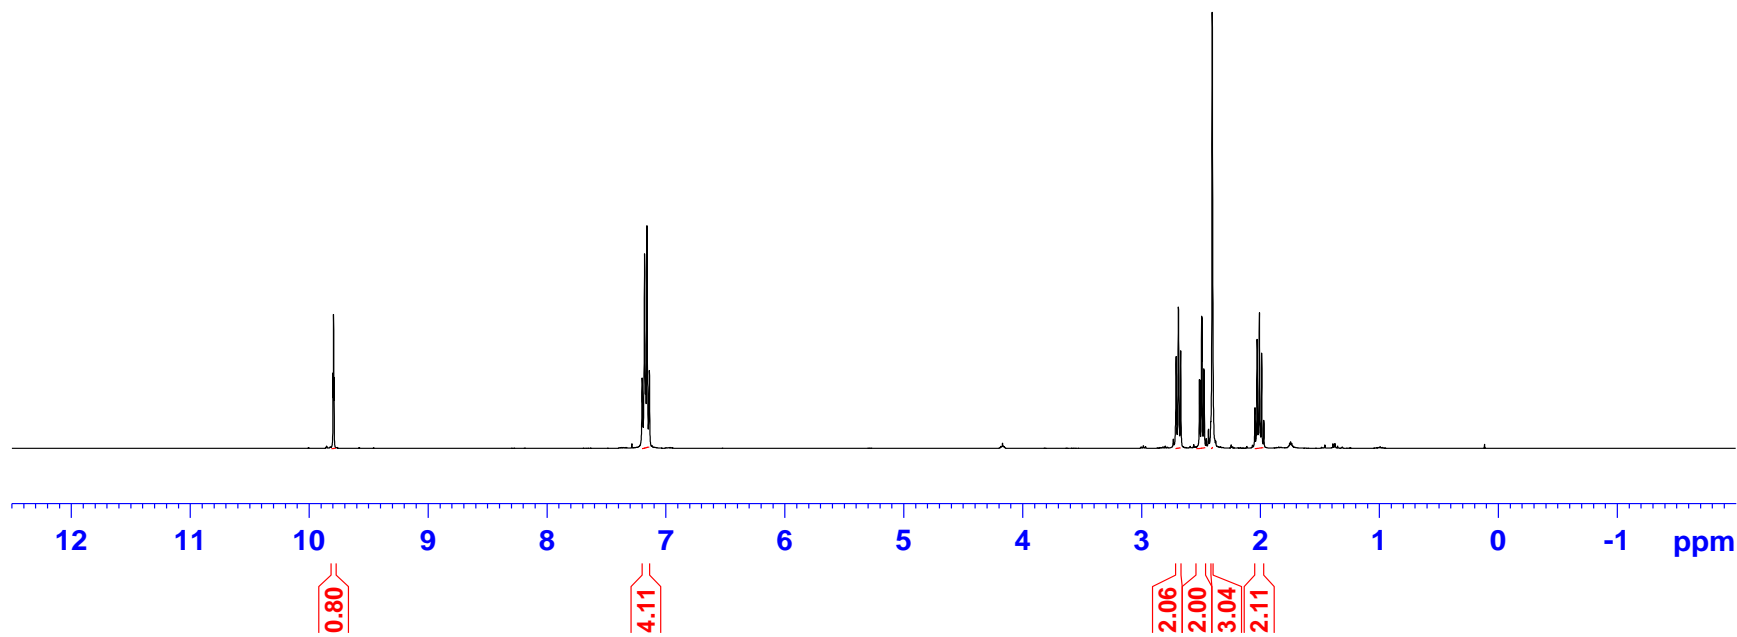

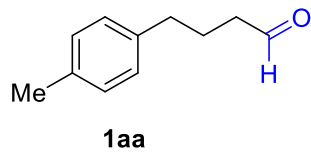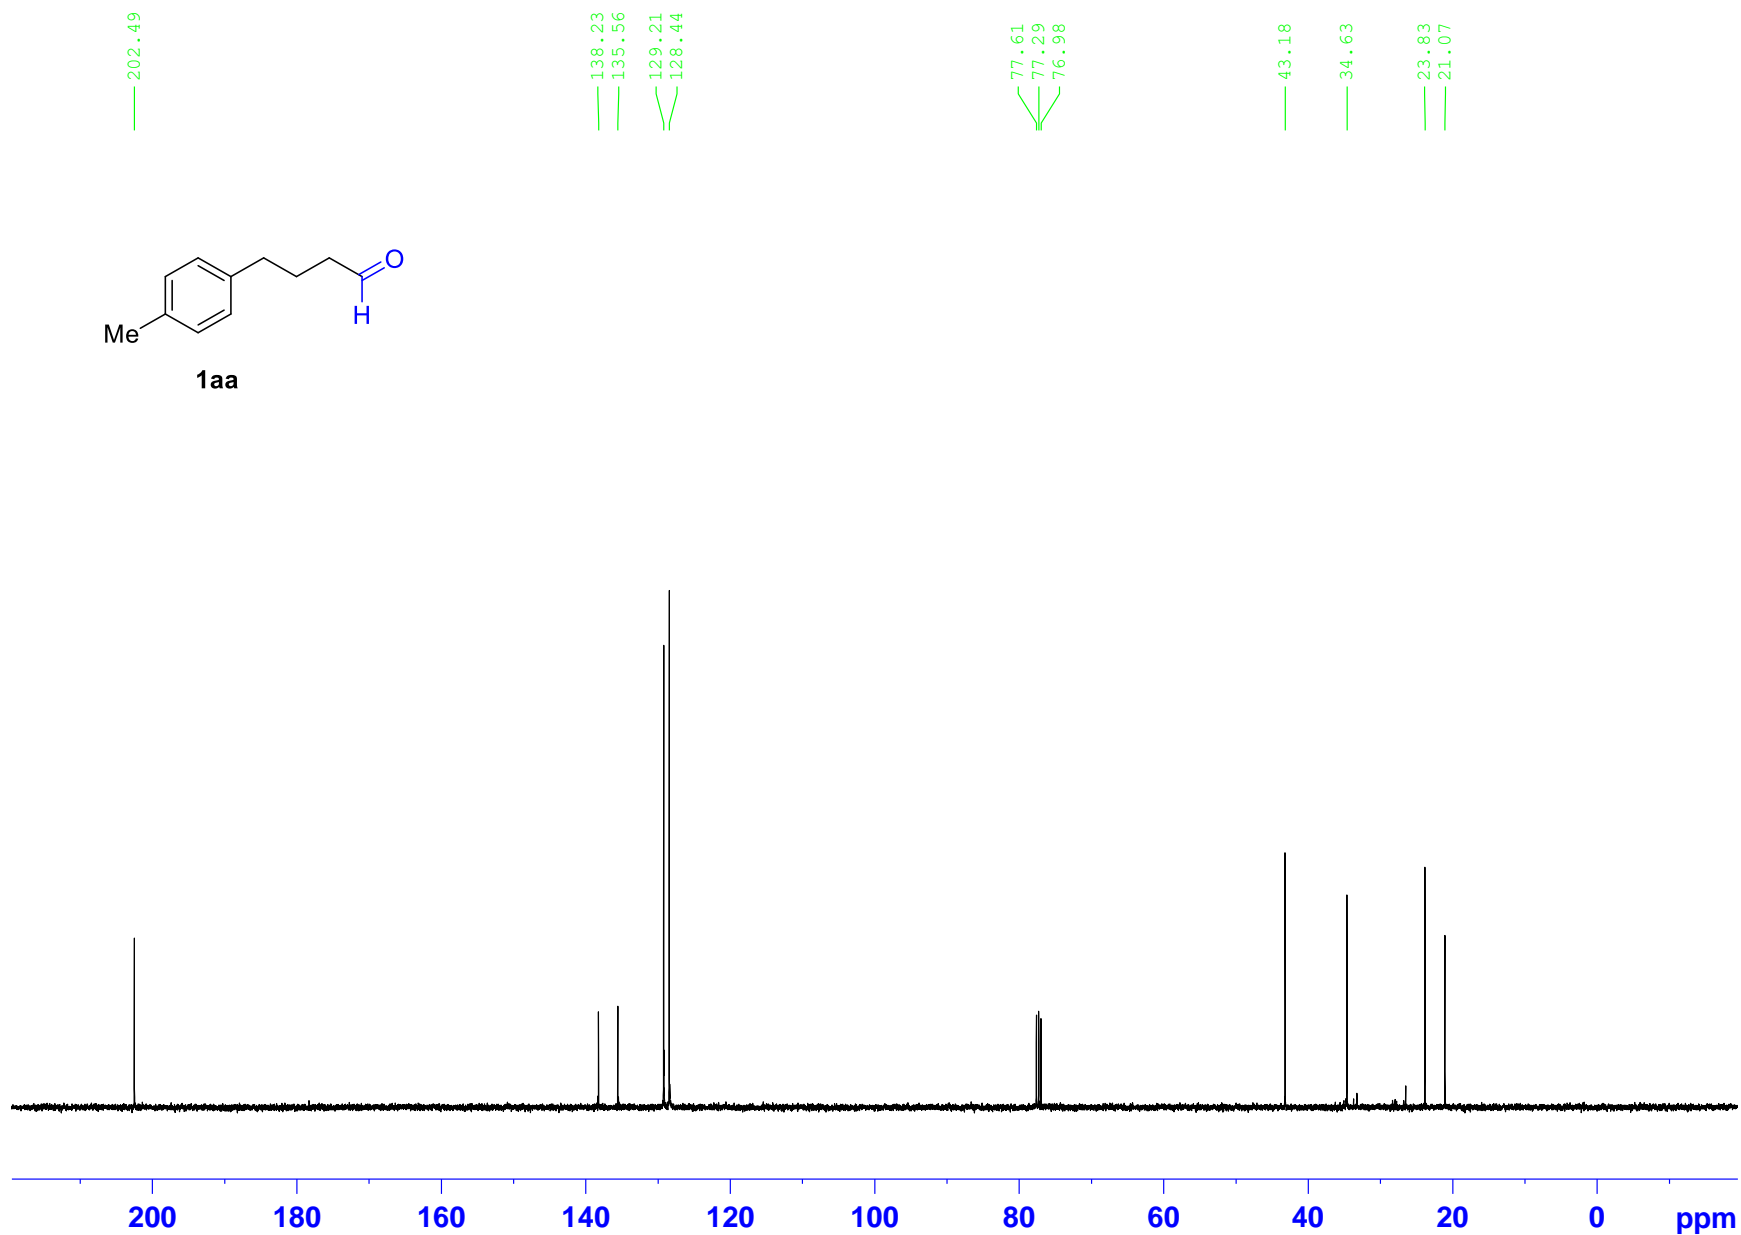

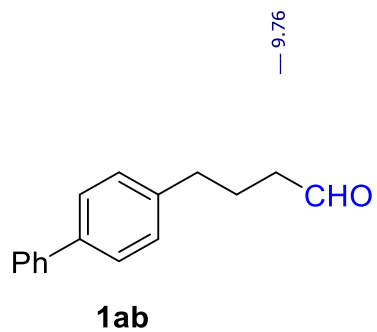

9.76

7.58  
7.56  
7.53  
7.51  
7.44  
7.42  
7.40  
7.34  
7.32  
7.30  
7.25  
7.23

2.71  
2.69  
2.67  
2.49  
2.49  
2.47  
2.47  
2.46  
2.45  
2.02  
2.01  
1.99  
1.97  
1.95

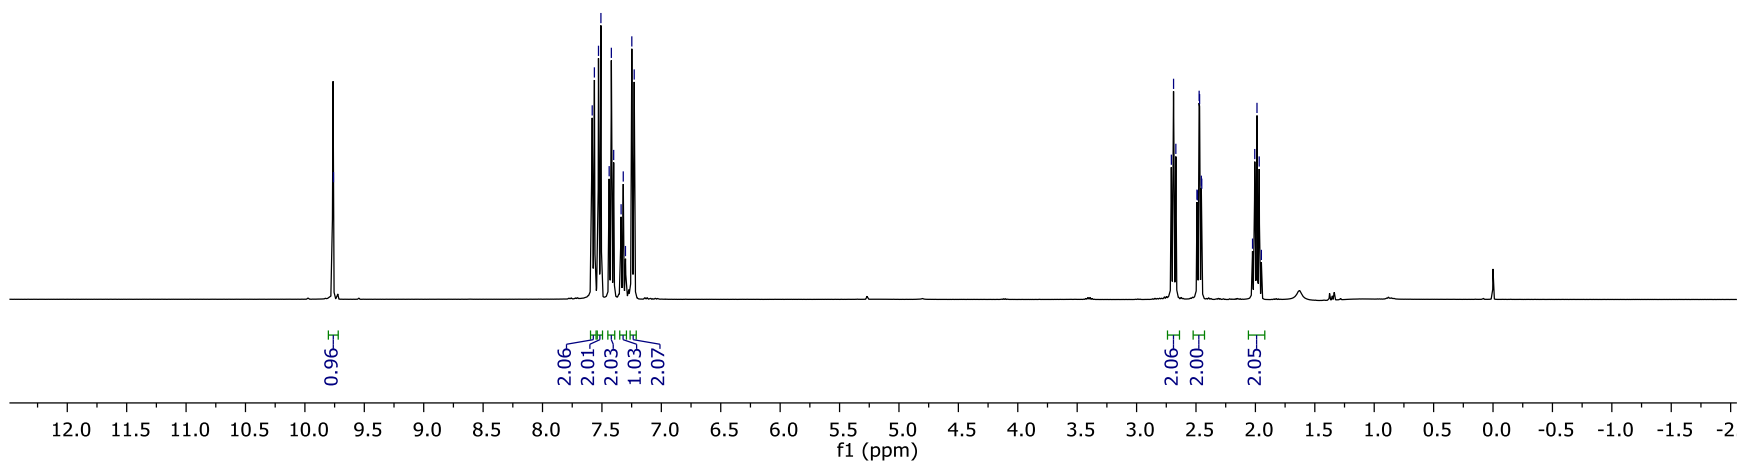

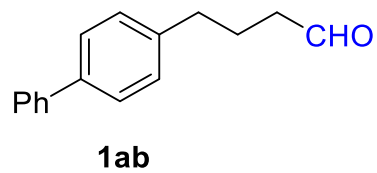

140.91  
140.28  
139.03  
128.84  
128.69  
127.14  
127.06  
126.94

77.32  
77.00  
76.68

— 43.10

— 34.57

— 23.55

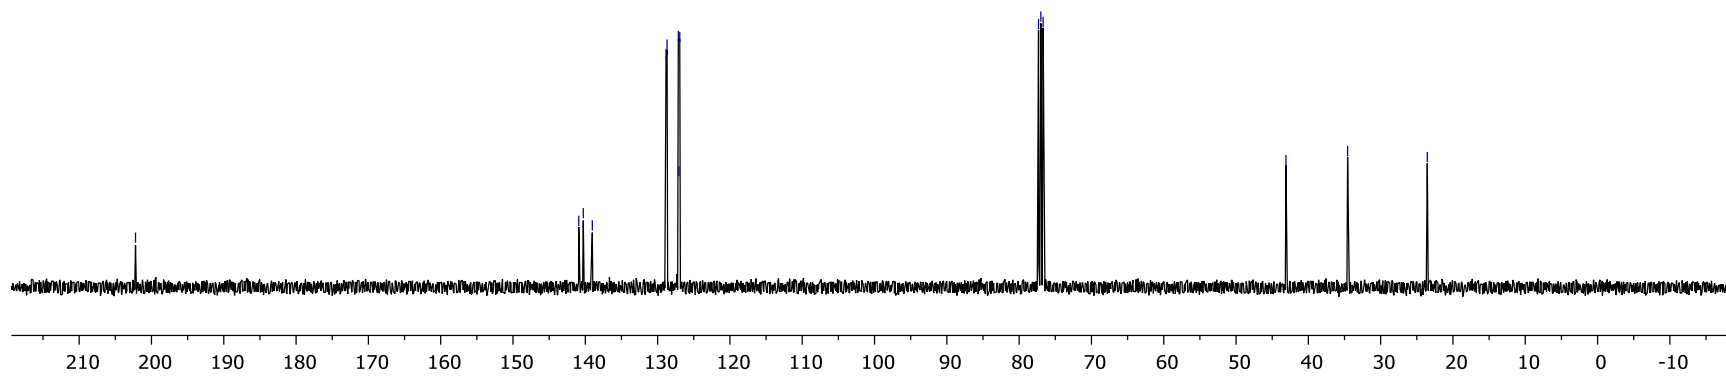

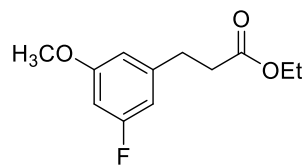

1o-ii

7.268  
6.537  
6.533  
6.523  
6.505  
6.500  
6.479  
6.473  
6.468  
6.452  
6.447  
6.441  
4.161  
4.143  
4.125  
4.107  
3.773  
2.921  
2.902  
2.882  
2.620  
2.600  
2.581  
1.261  
1.243  
1.225

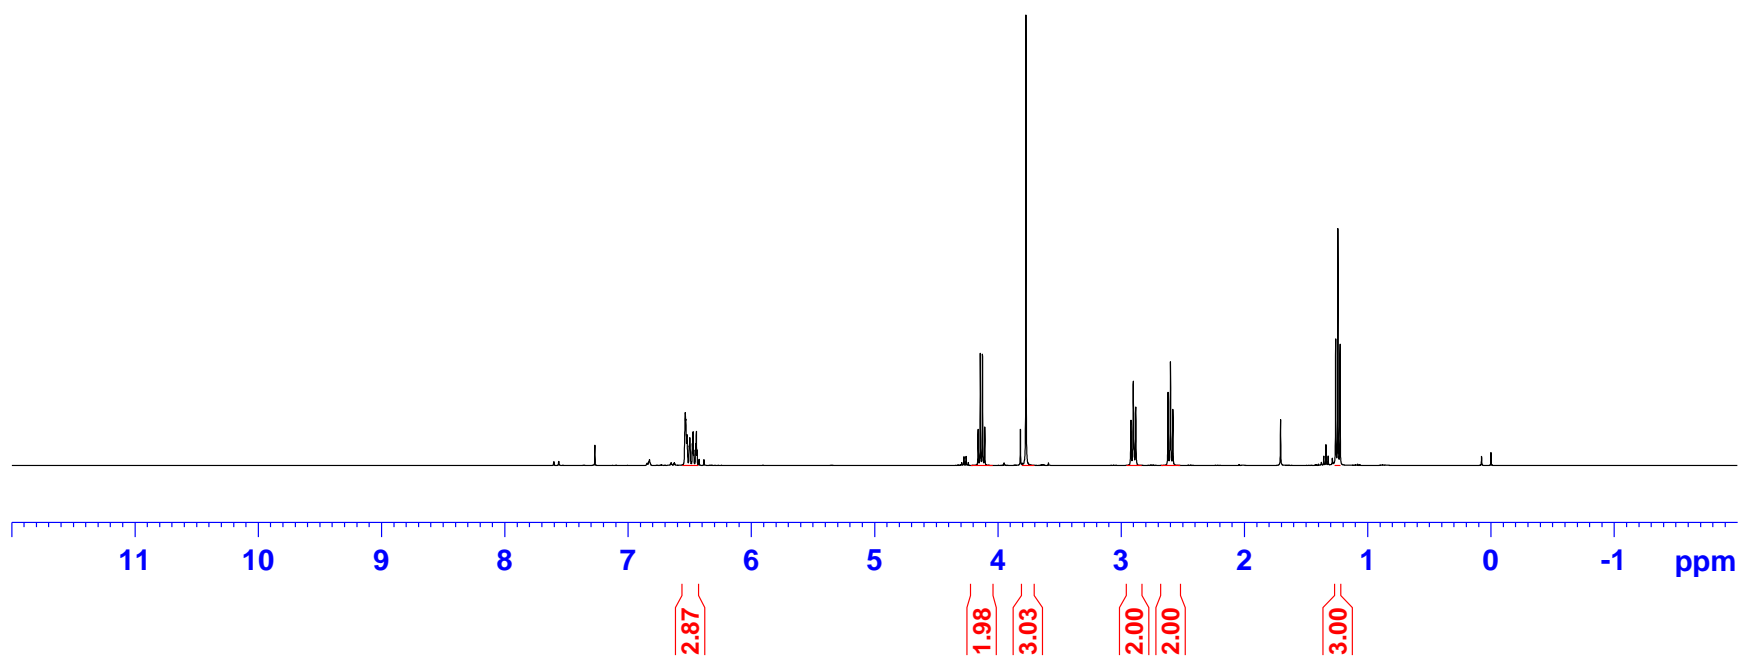



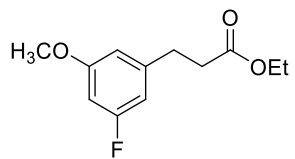

1o-ii

172.57  
164.79  
162.36  
160.88  
160.77  
143.59  
143.49

109.89  
109.87  
107.48  
107.26  
99.46  
99.21

77.32  
77.00  
76.68

60.50  
55.39

35.43  
30.85  
30.83

14.15

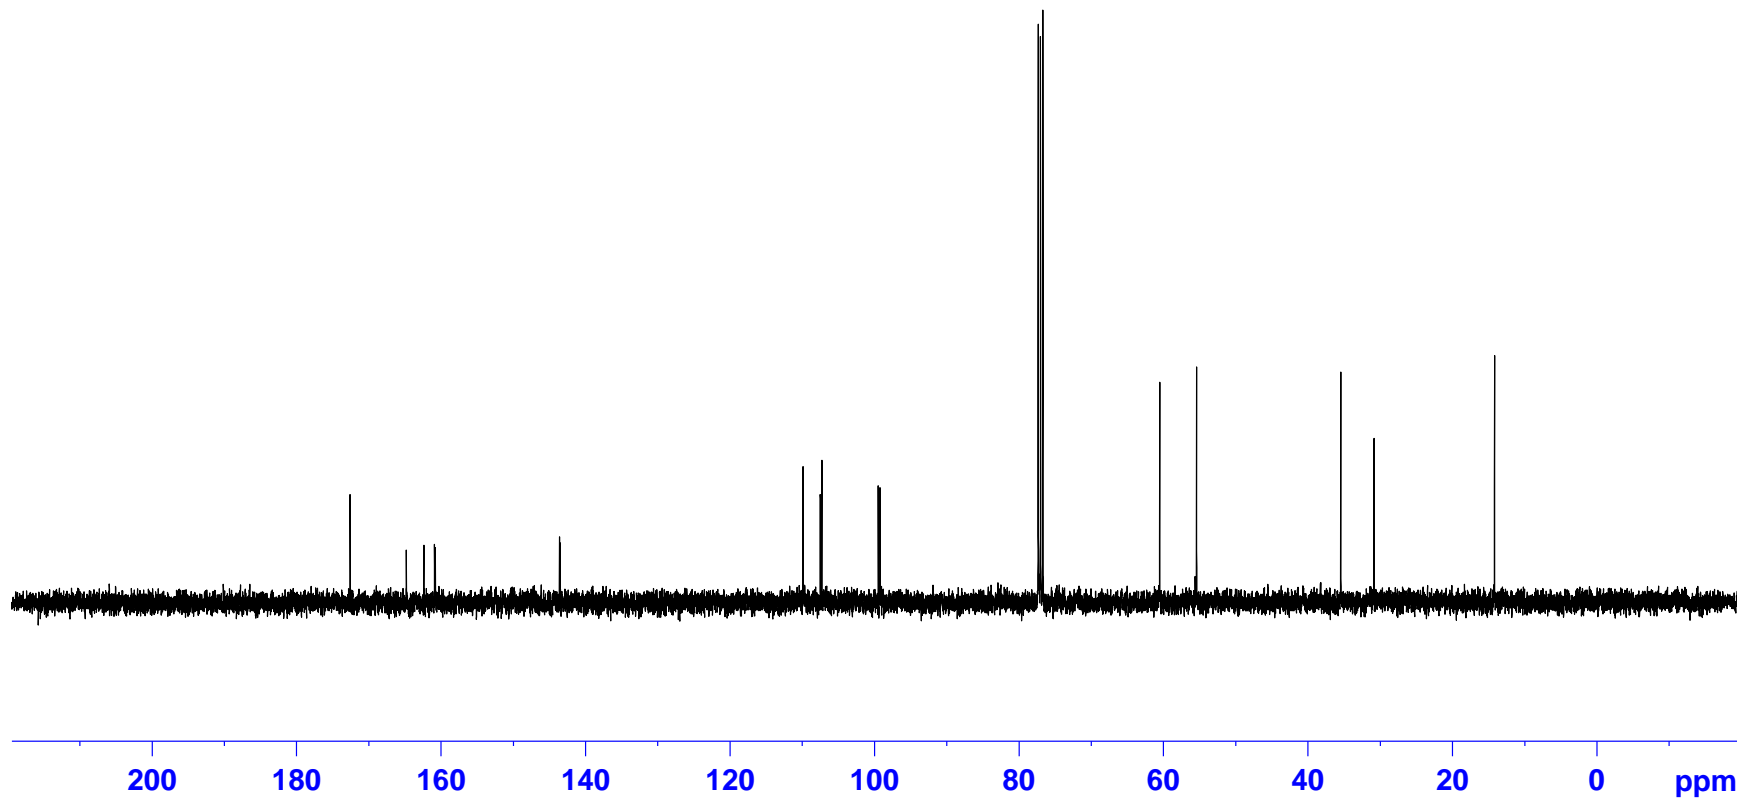

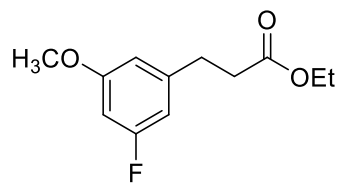

**1o-ii**

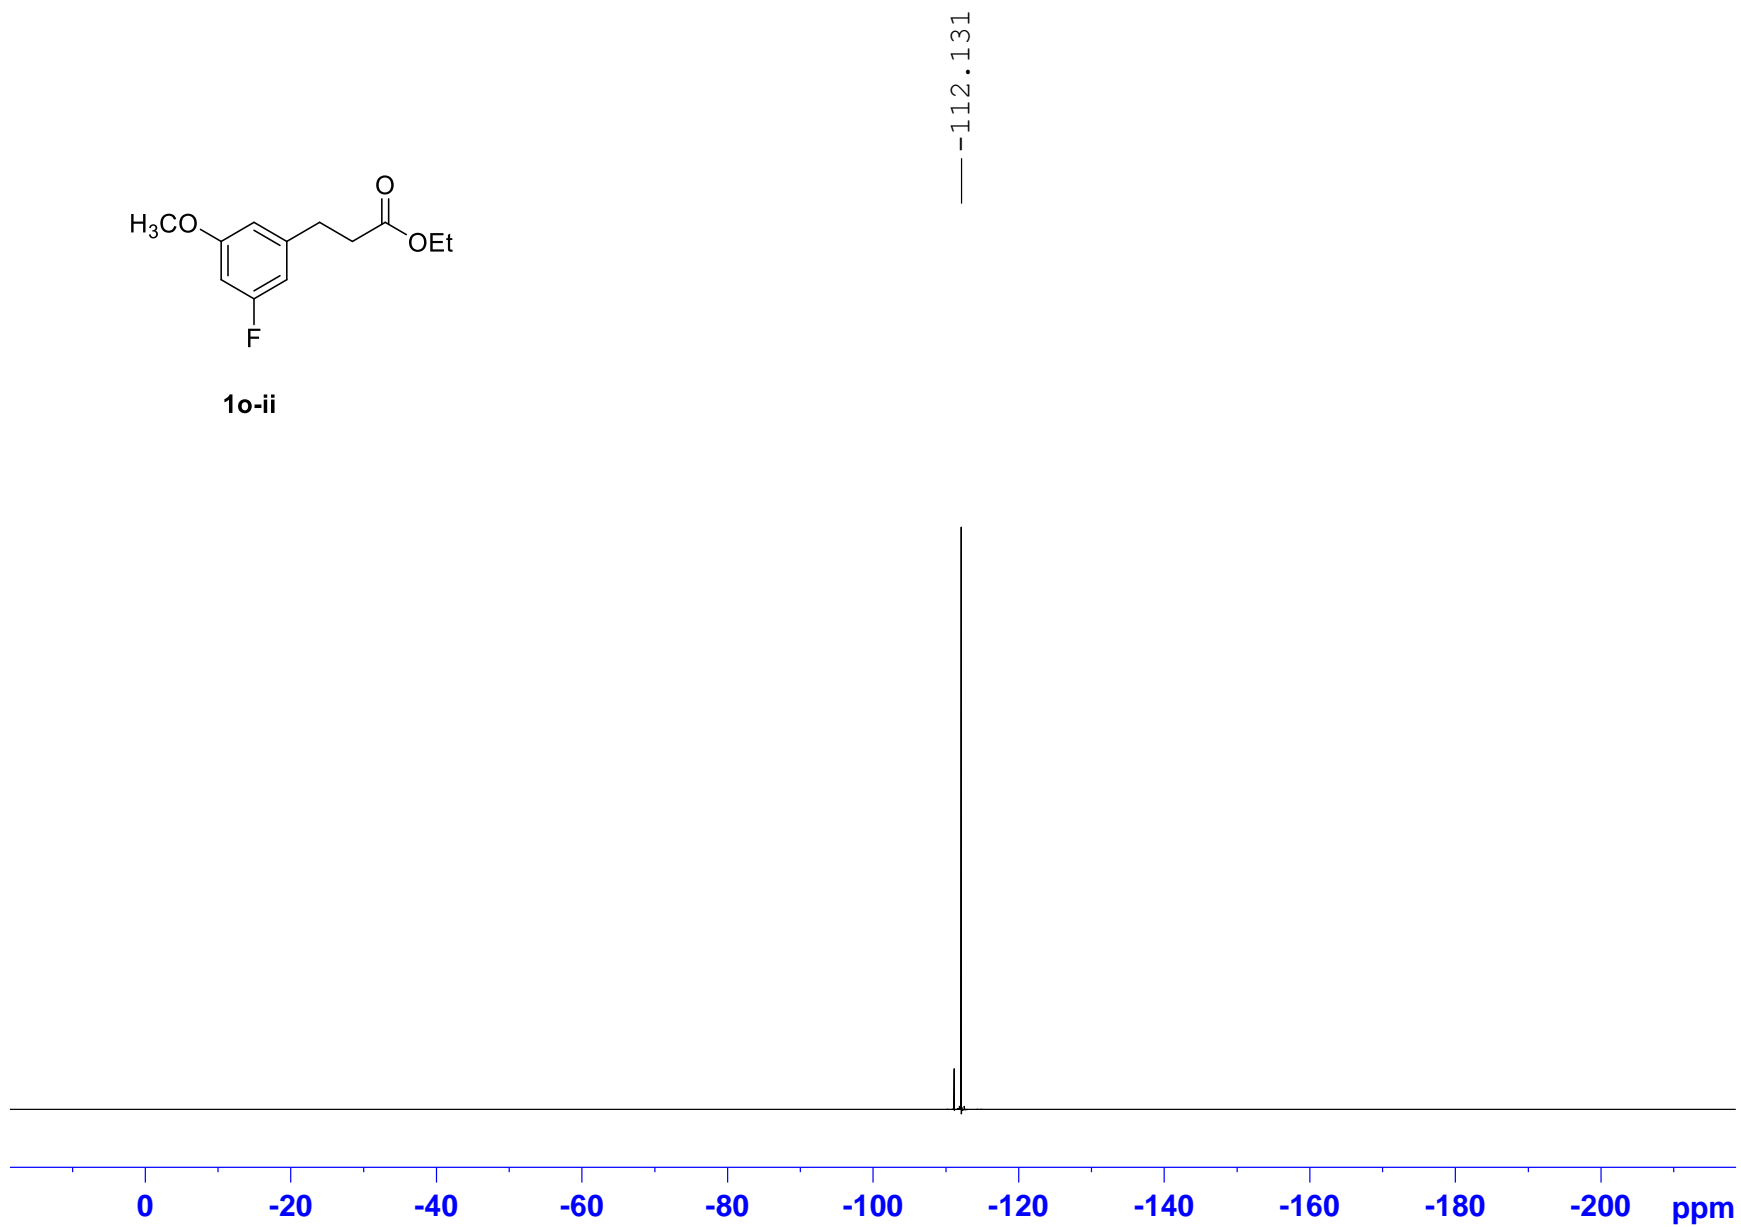

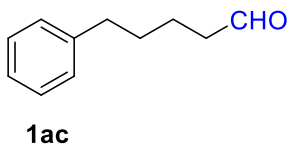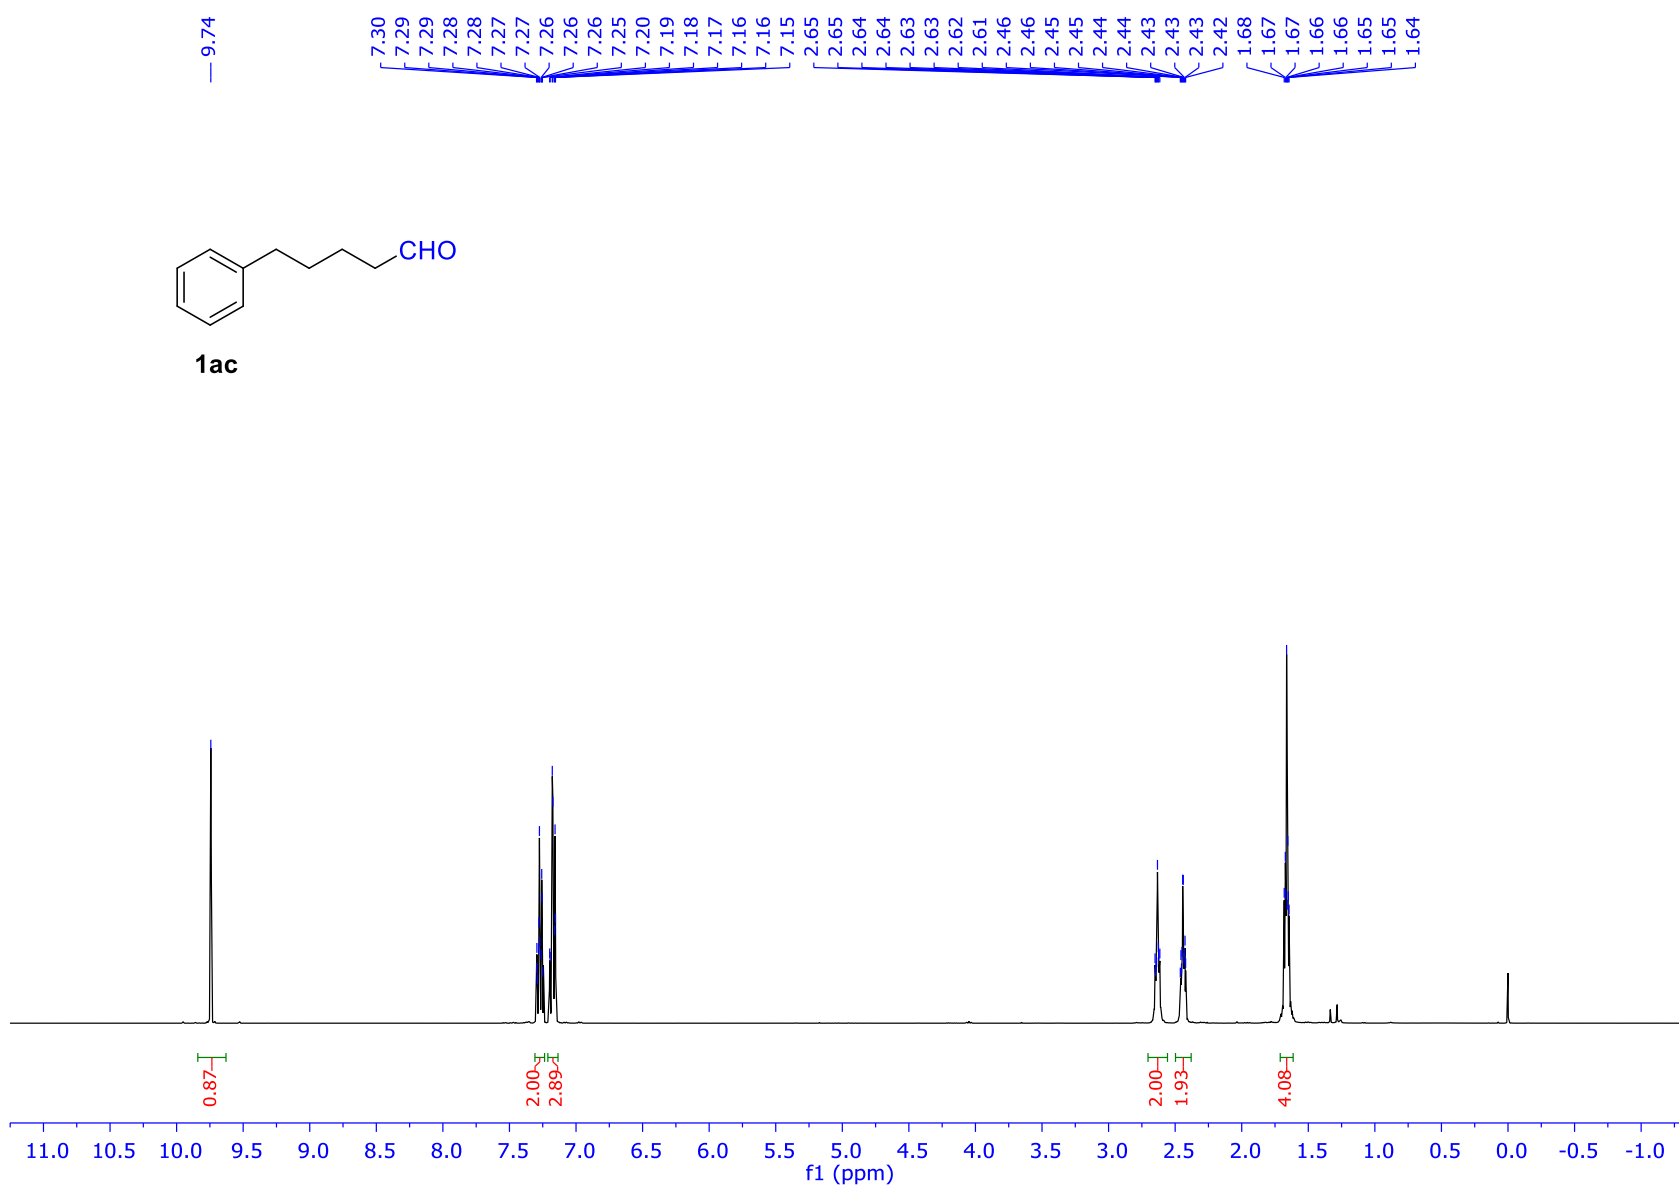

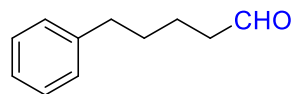

**1ac**

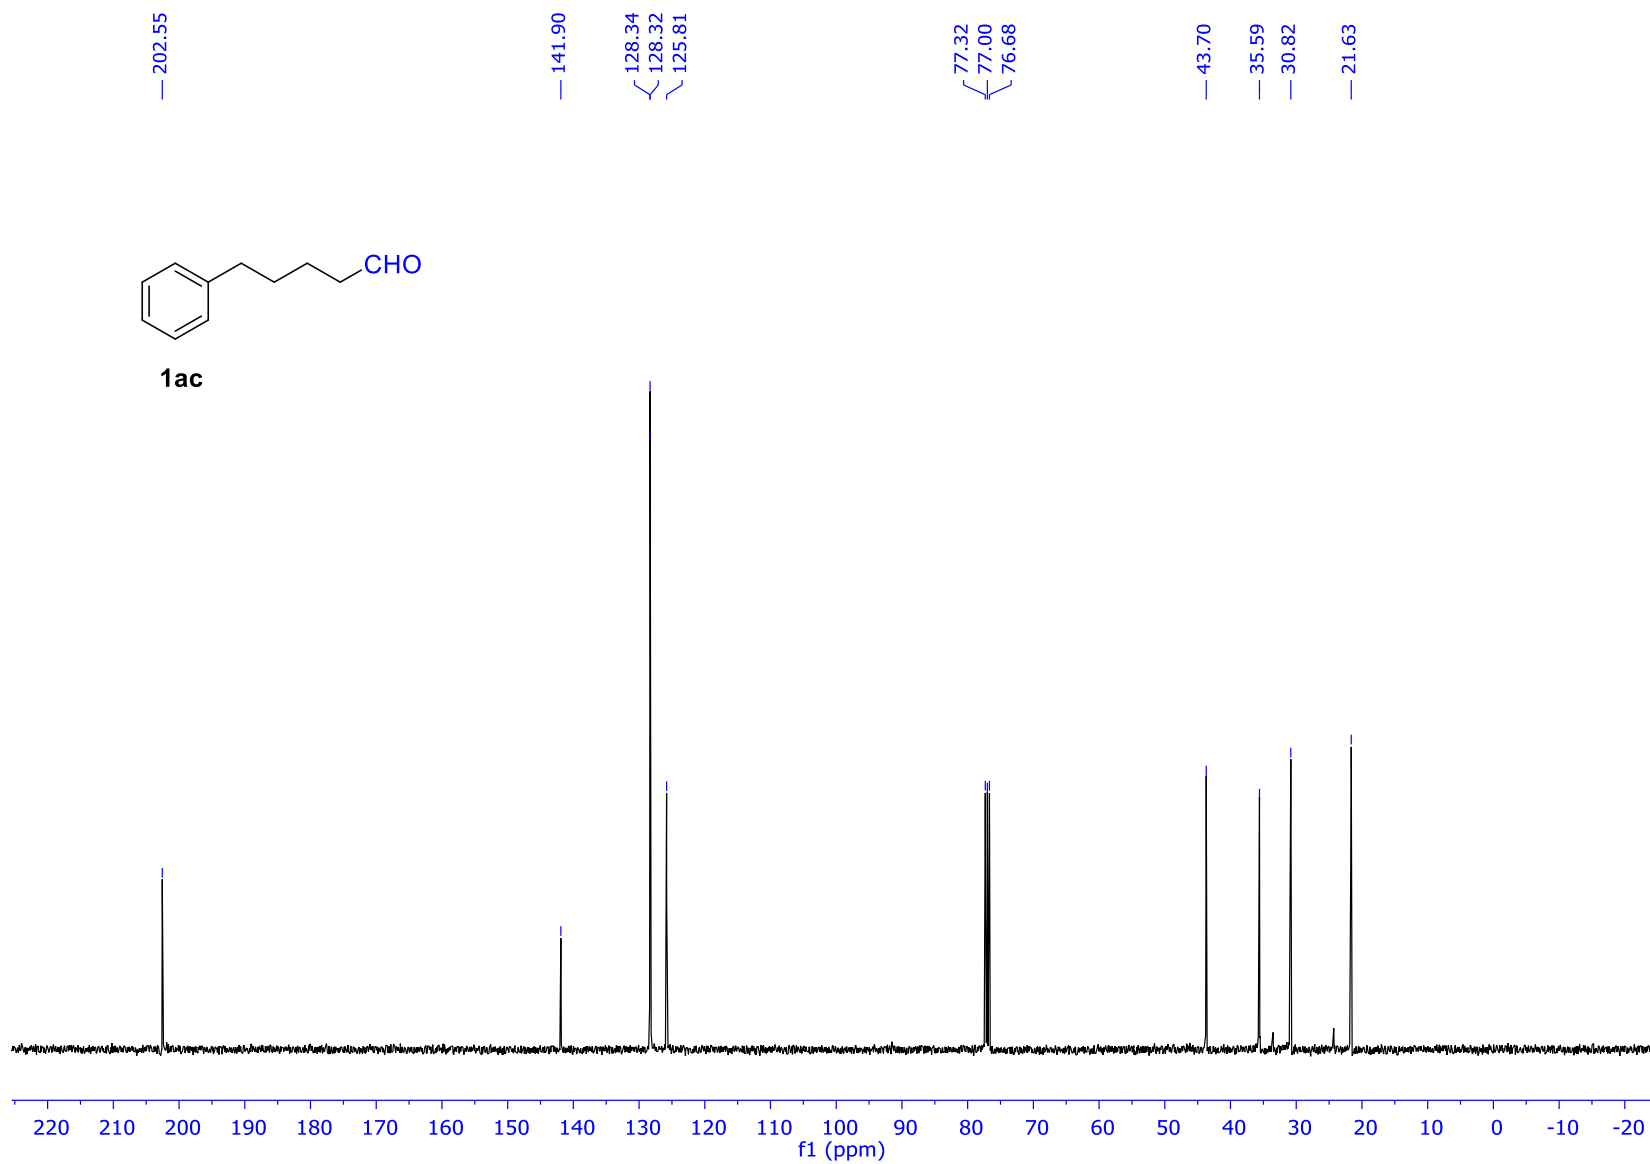

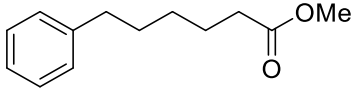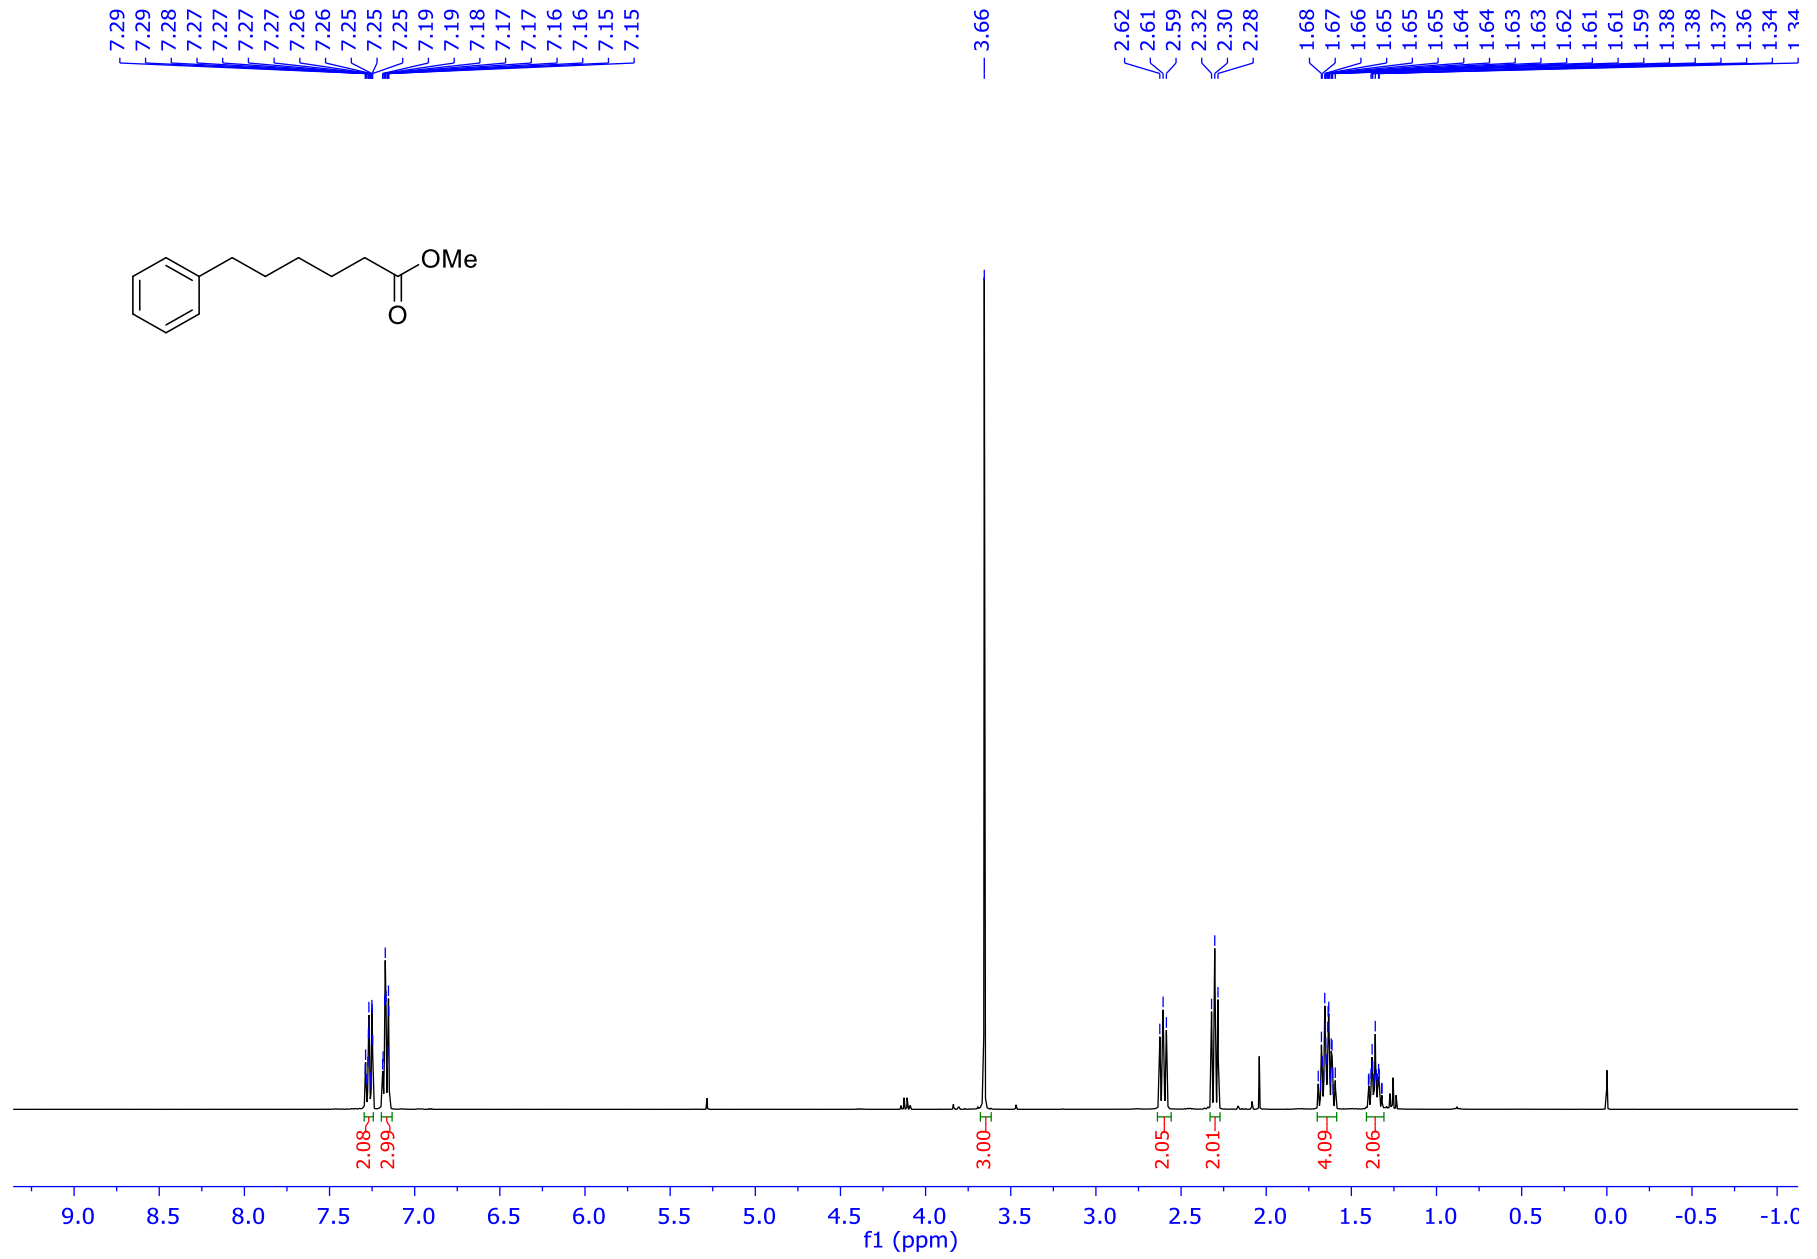

S181

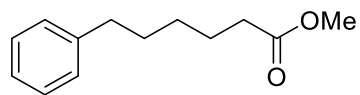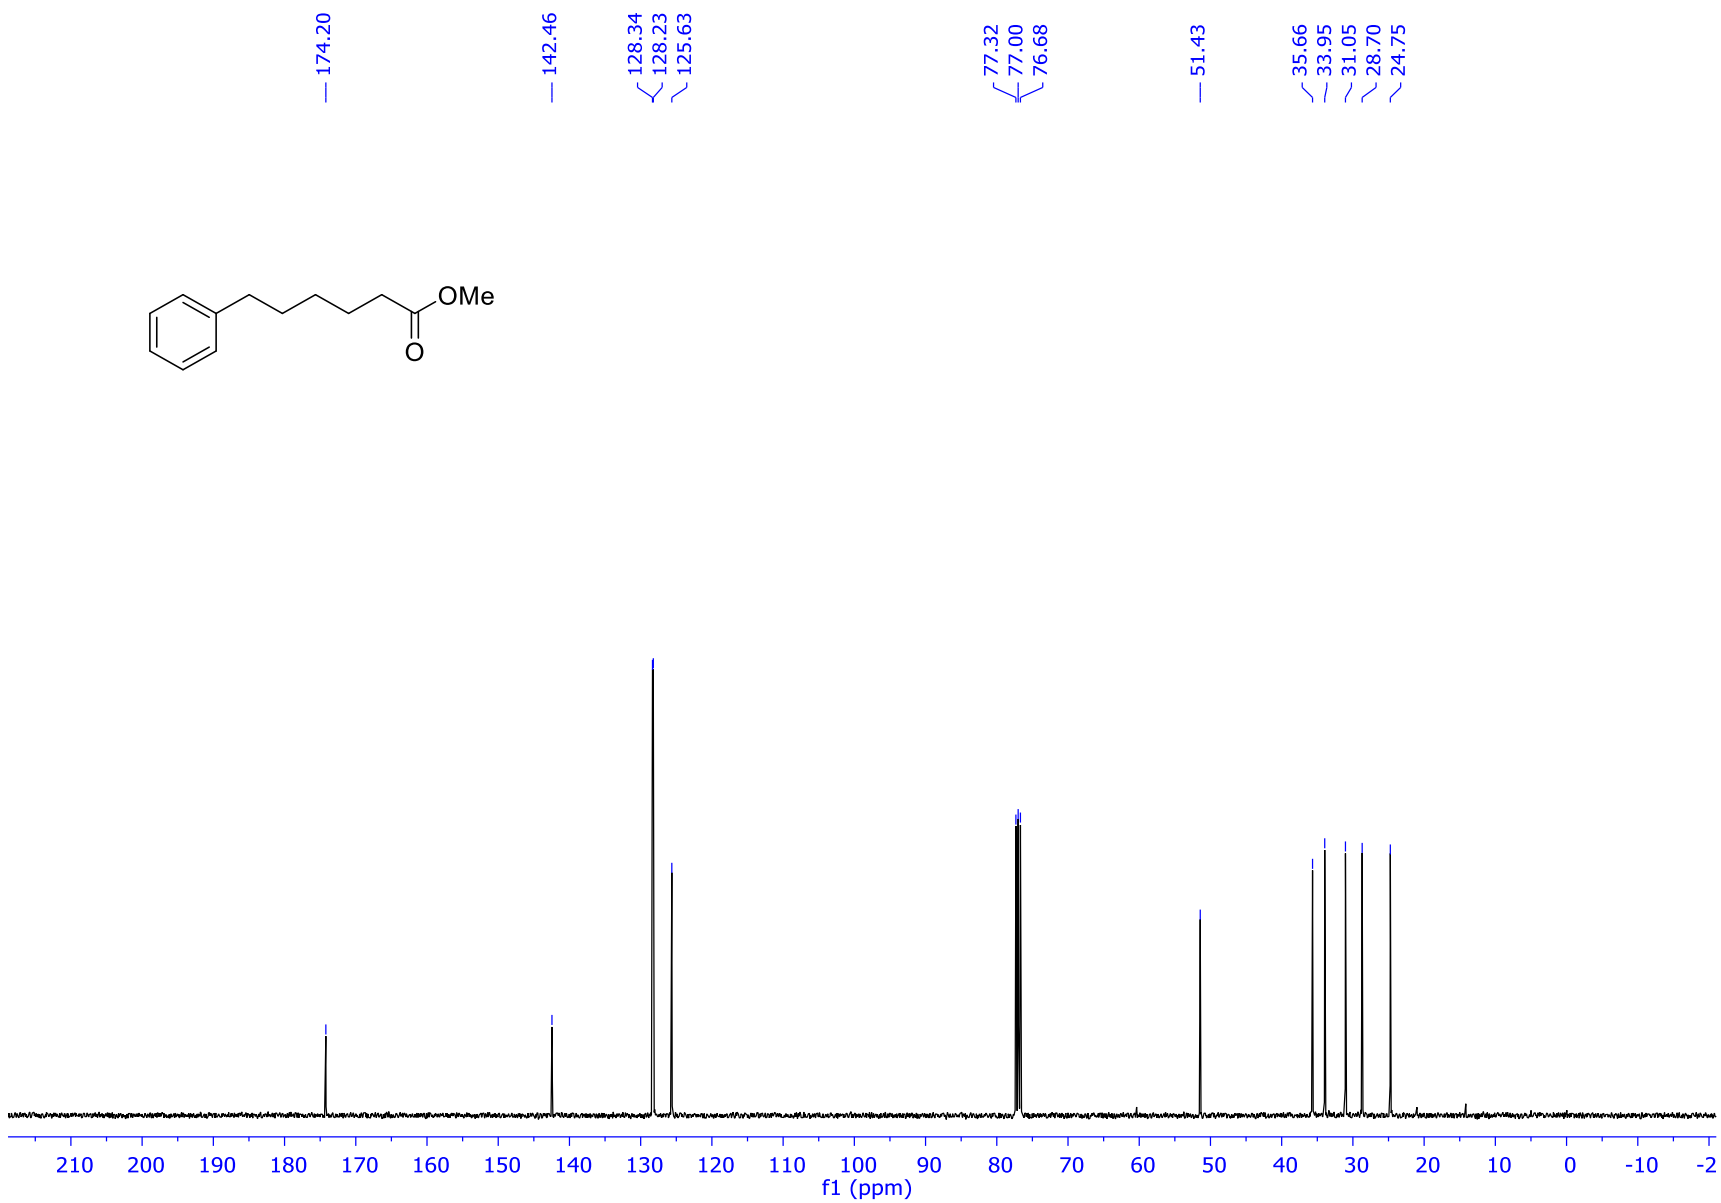

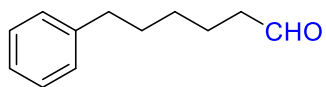

**1ad**

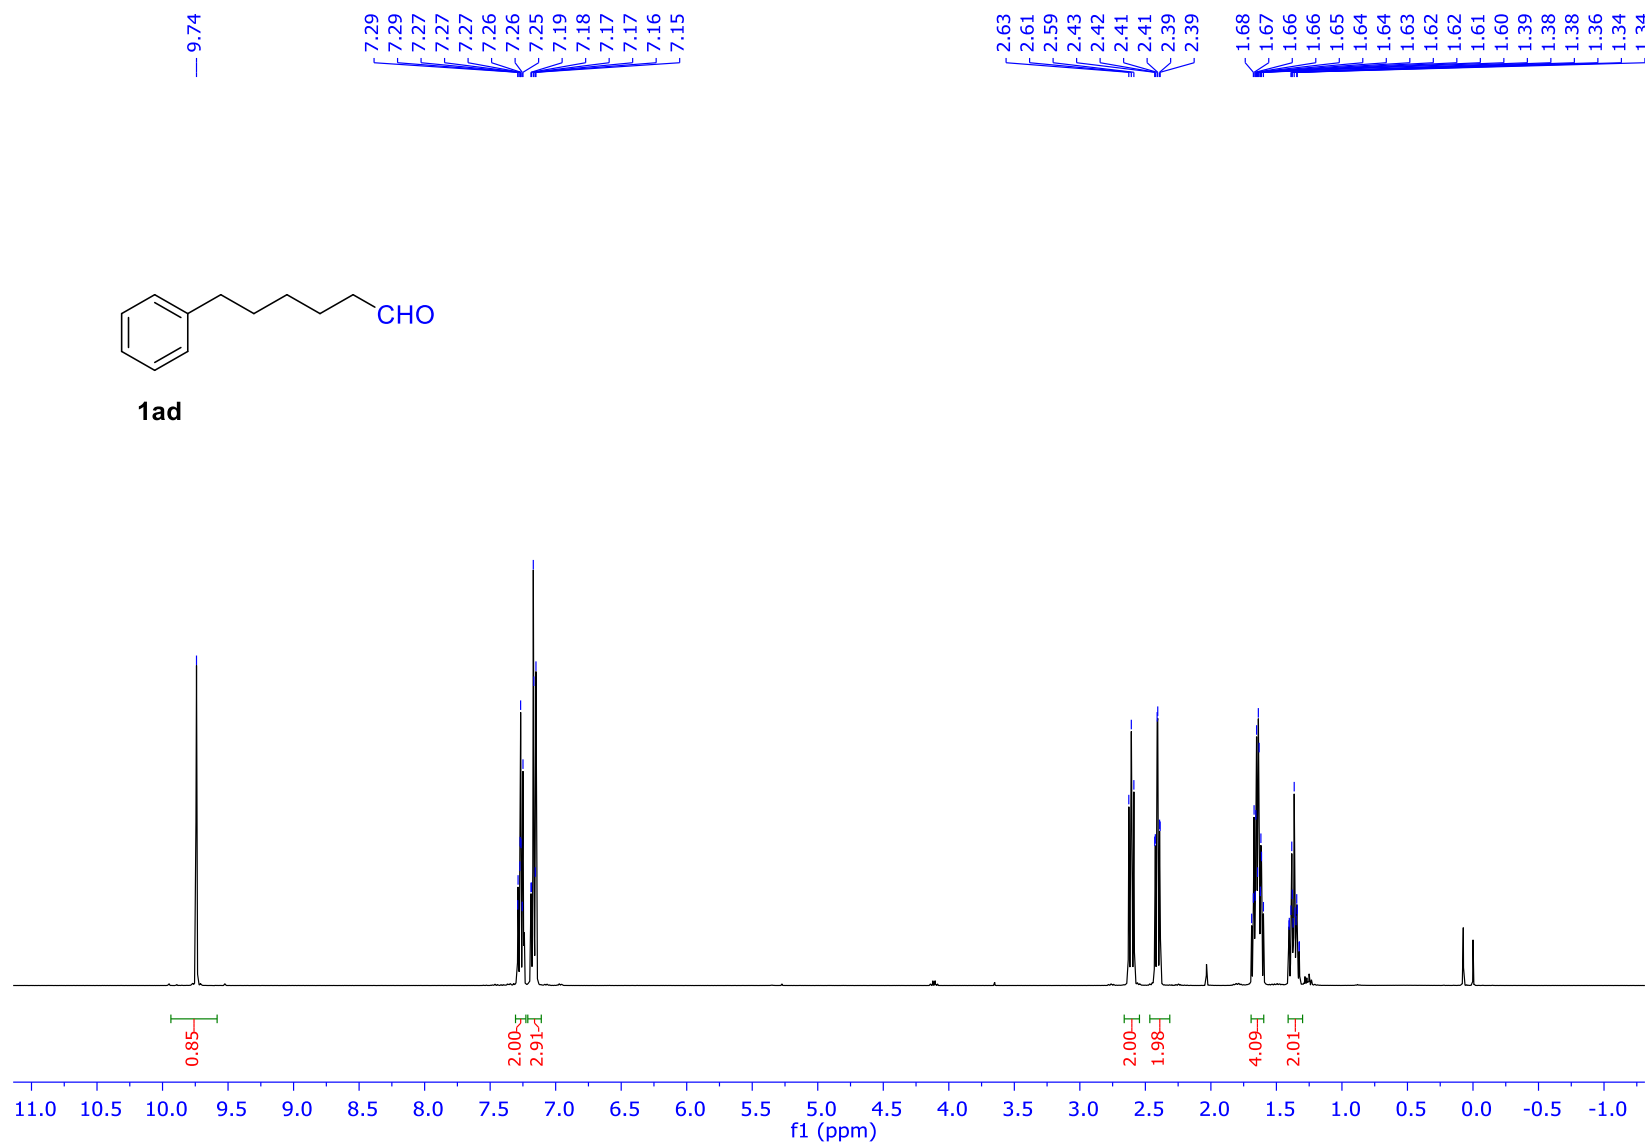

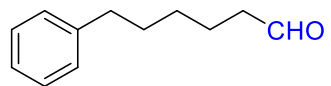

**1ad**

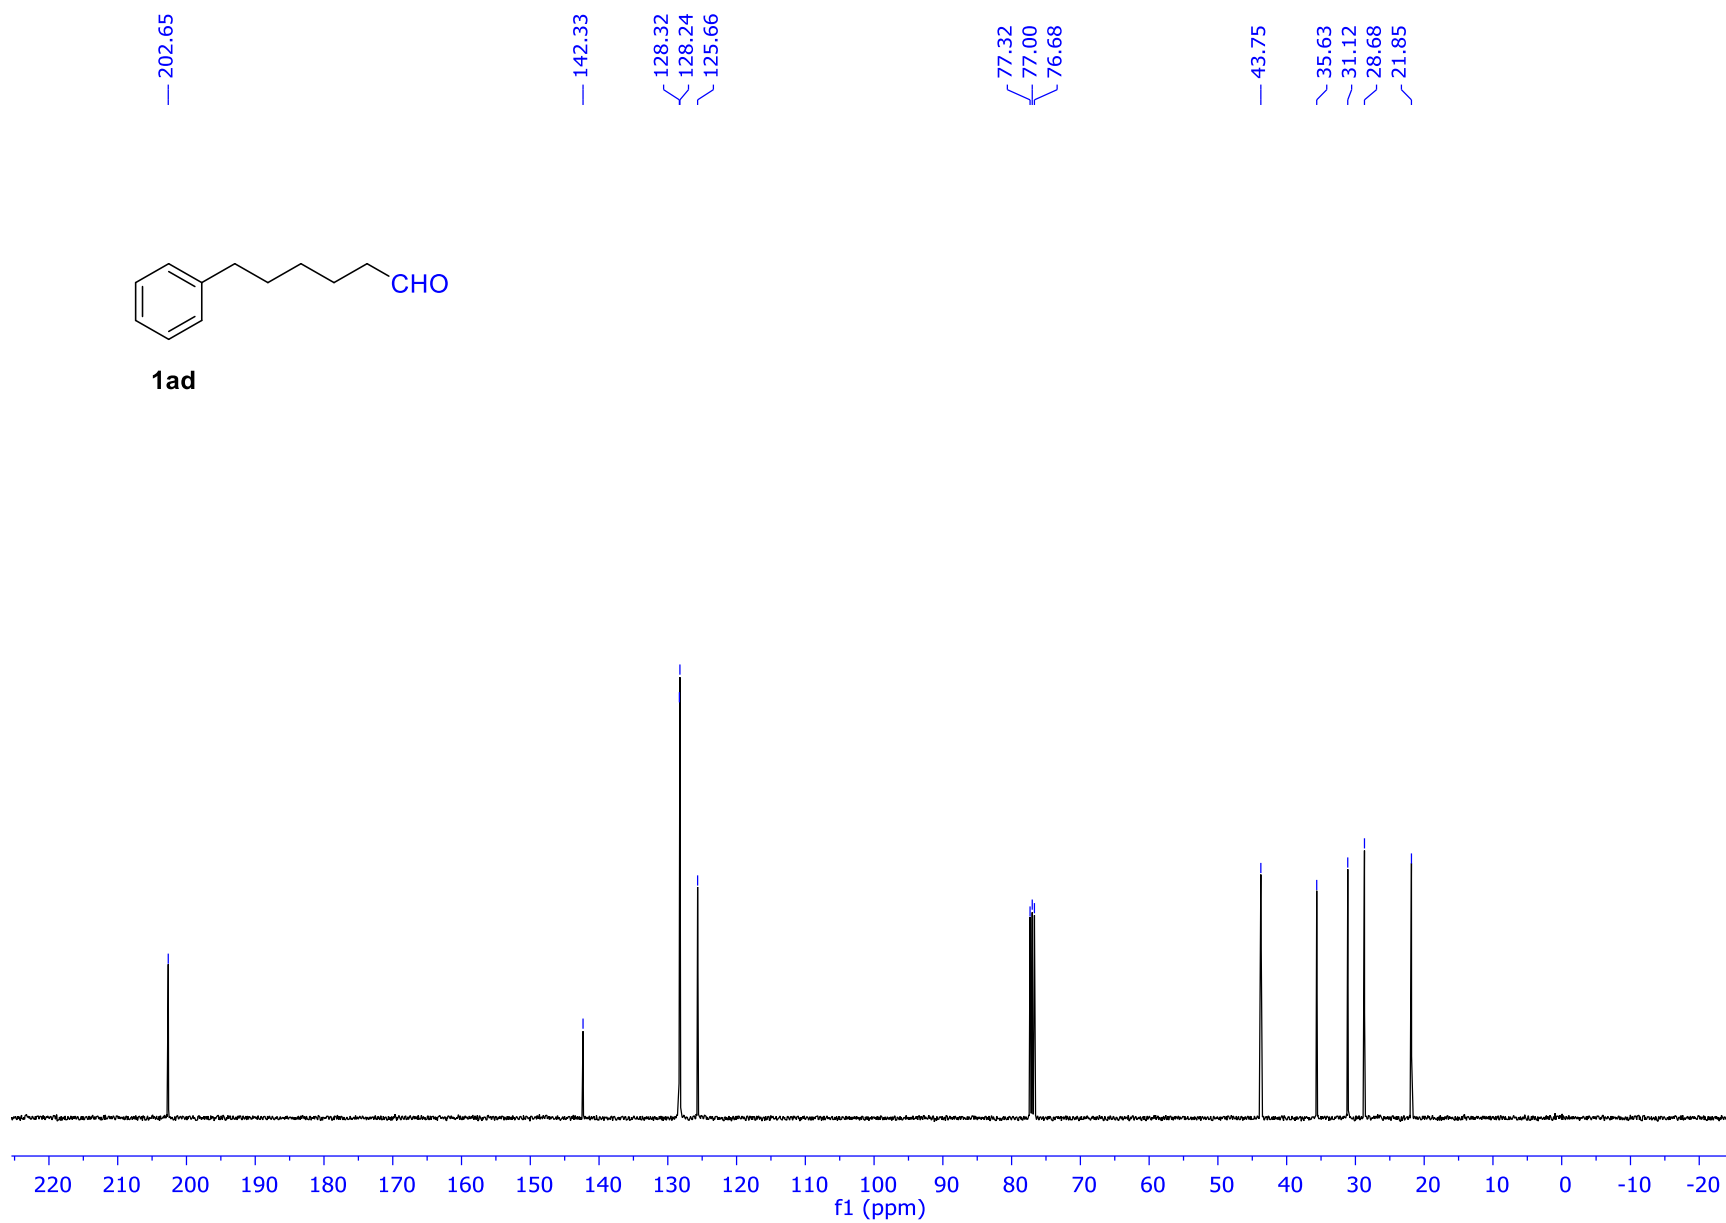



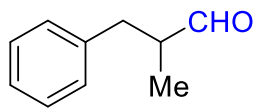

1ae

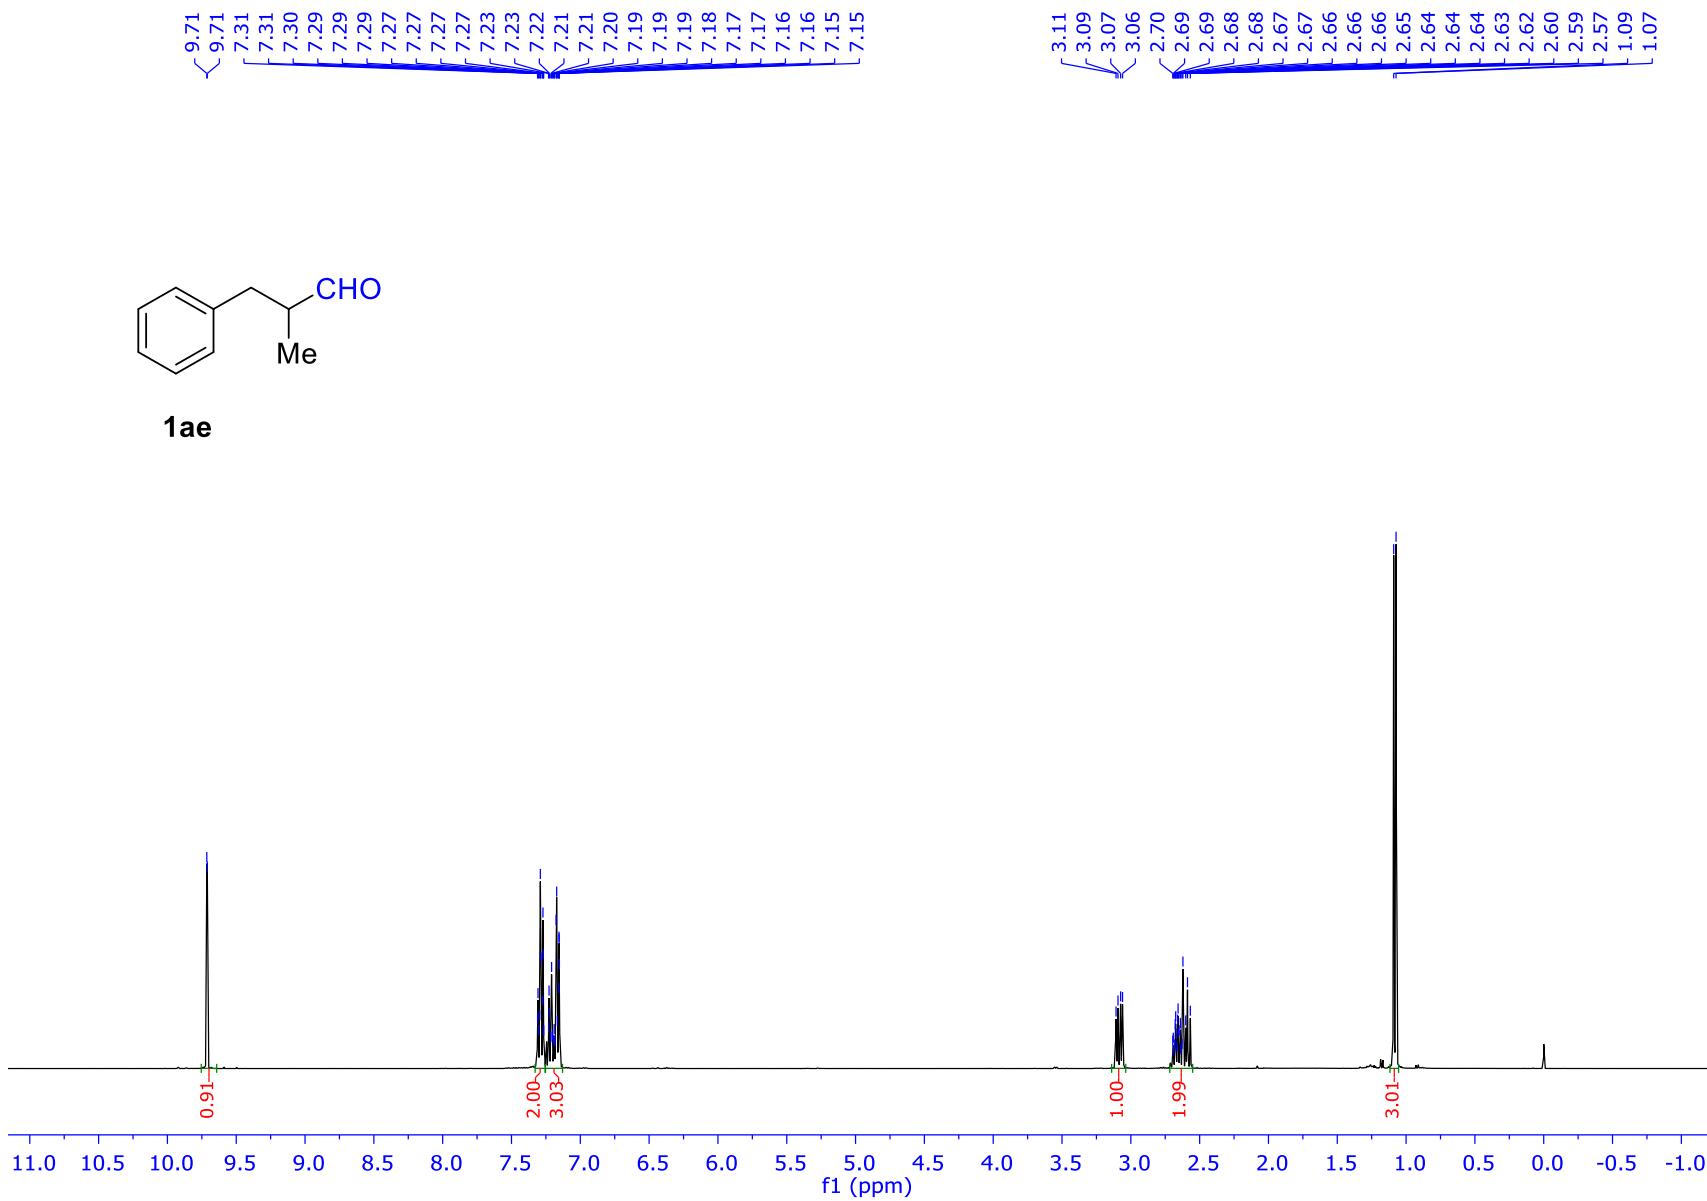

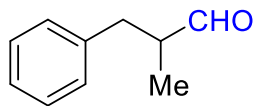

**1ae**

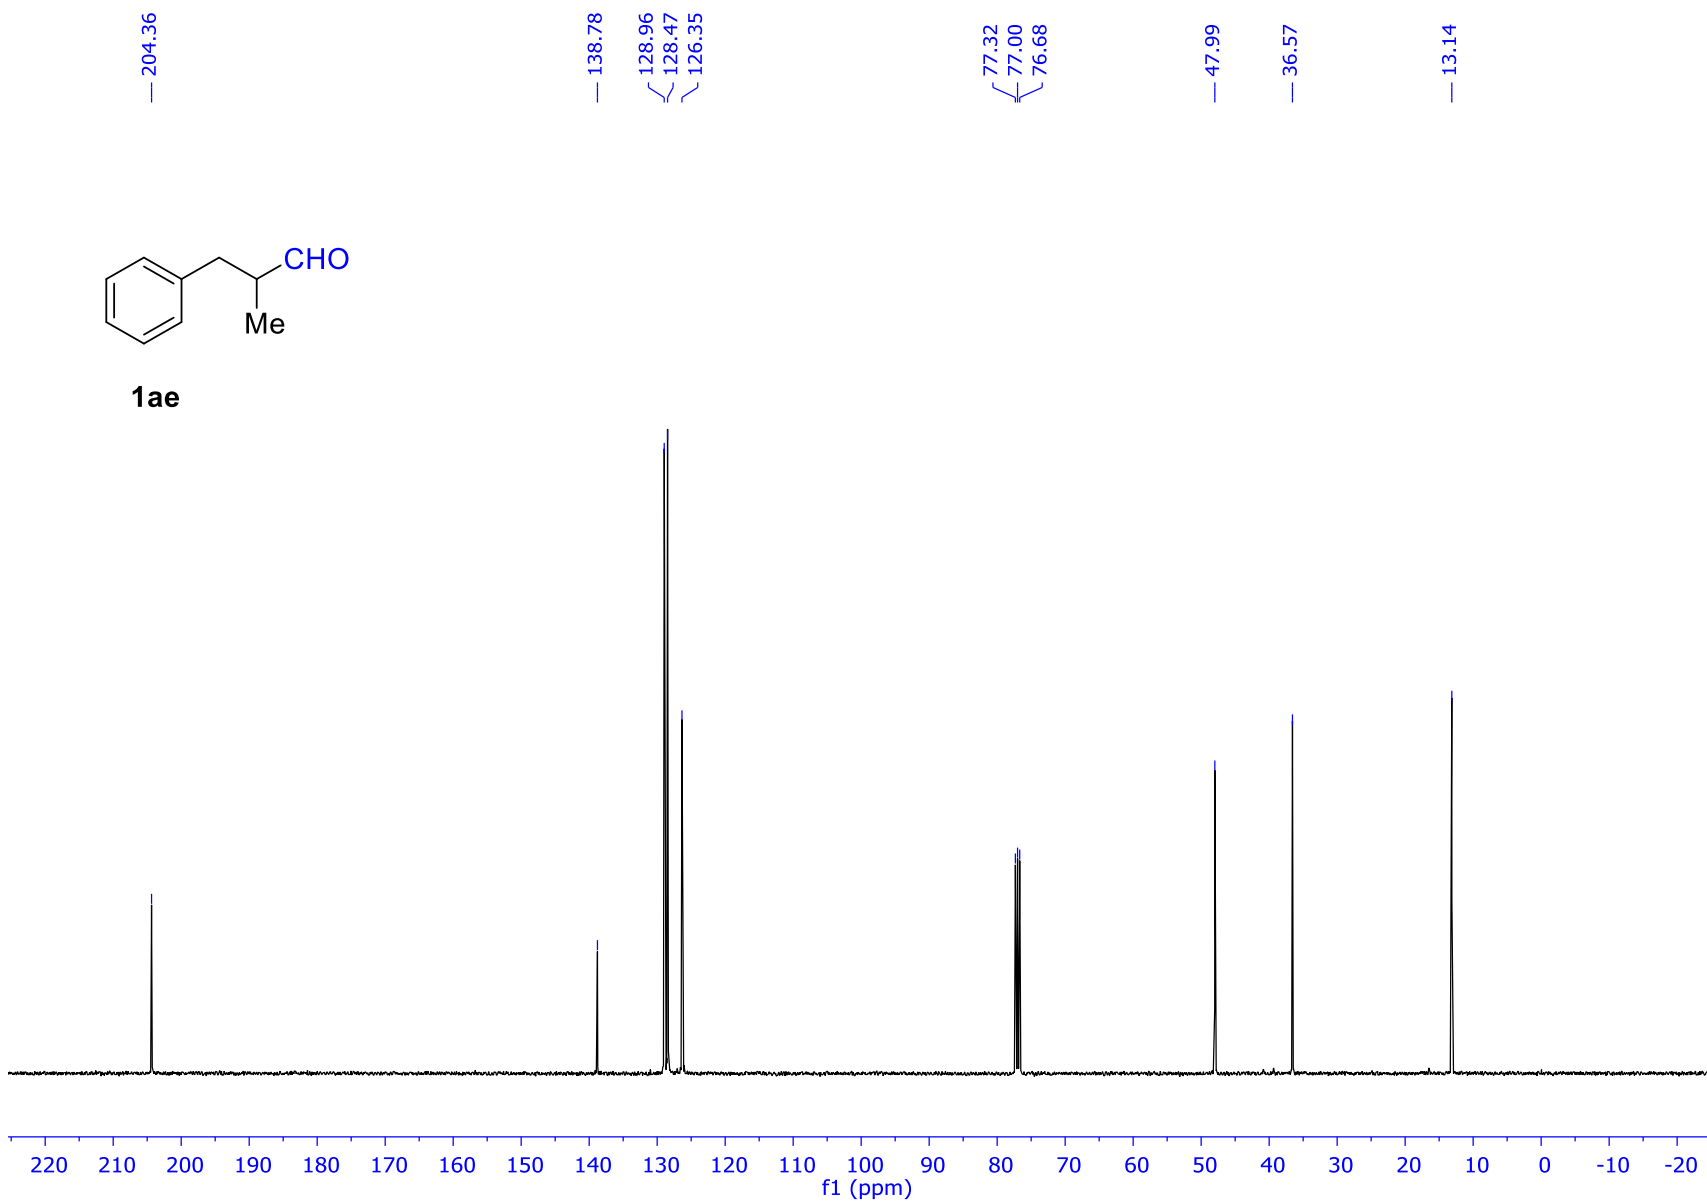

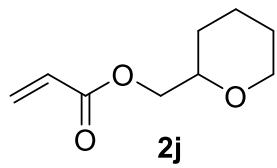

6.297  
6.293  
6.253  
6.250  
6.055  
6.029  
6.011  
5.986  
5.697  
5.694  
5.671  
5.668  
4.015  
4.006  
3.986  
3.977  
3.971  
3.955  
3.942  
3.926  
3.870  
3.865  
3.860  
3.842  
3.837  
3.832  
3.442  
3.430  
3.426  
3.414  
3.316  
3.295  
3.288  
3.266  
3.260  
1.744  
1.739  
1.733  
1.713  
1.707  
1.460  
1.452  
1.431  
1.428  
1.422  
1.417  
1.408  
1.404  
1.399  
1.389  
1.382  
1.375  
1.351  
1.216  
1.186

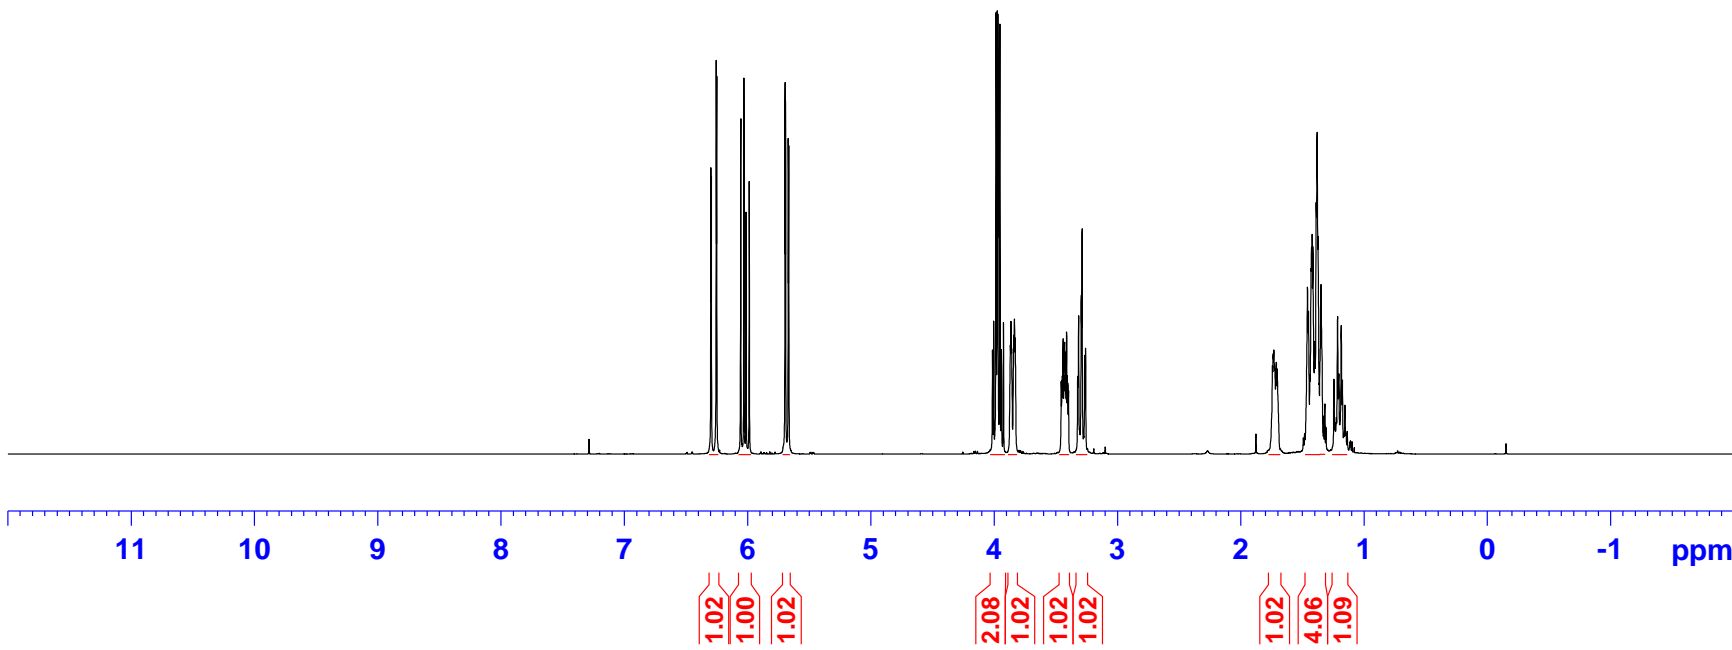

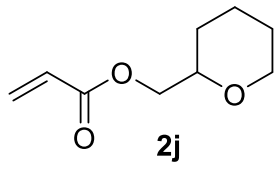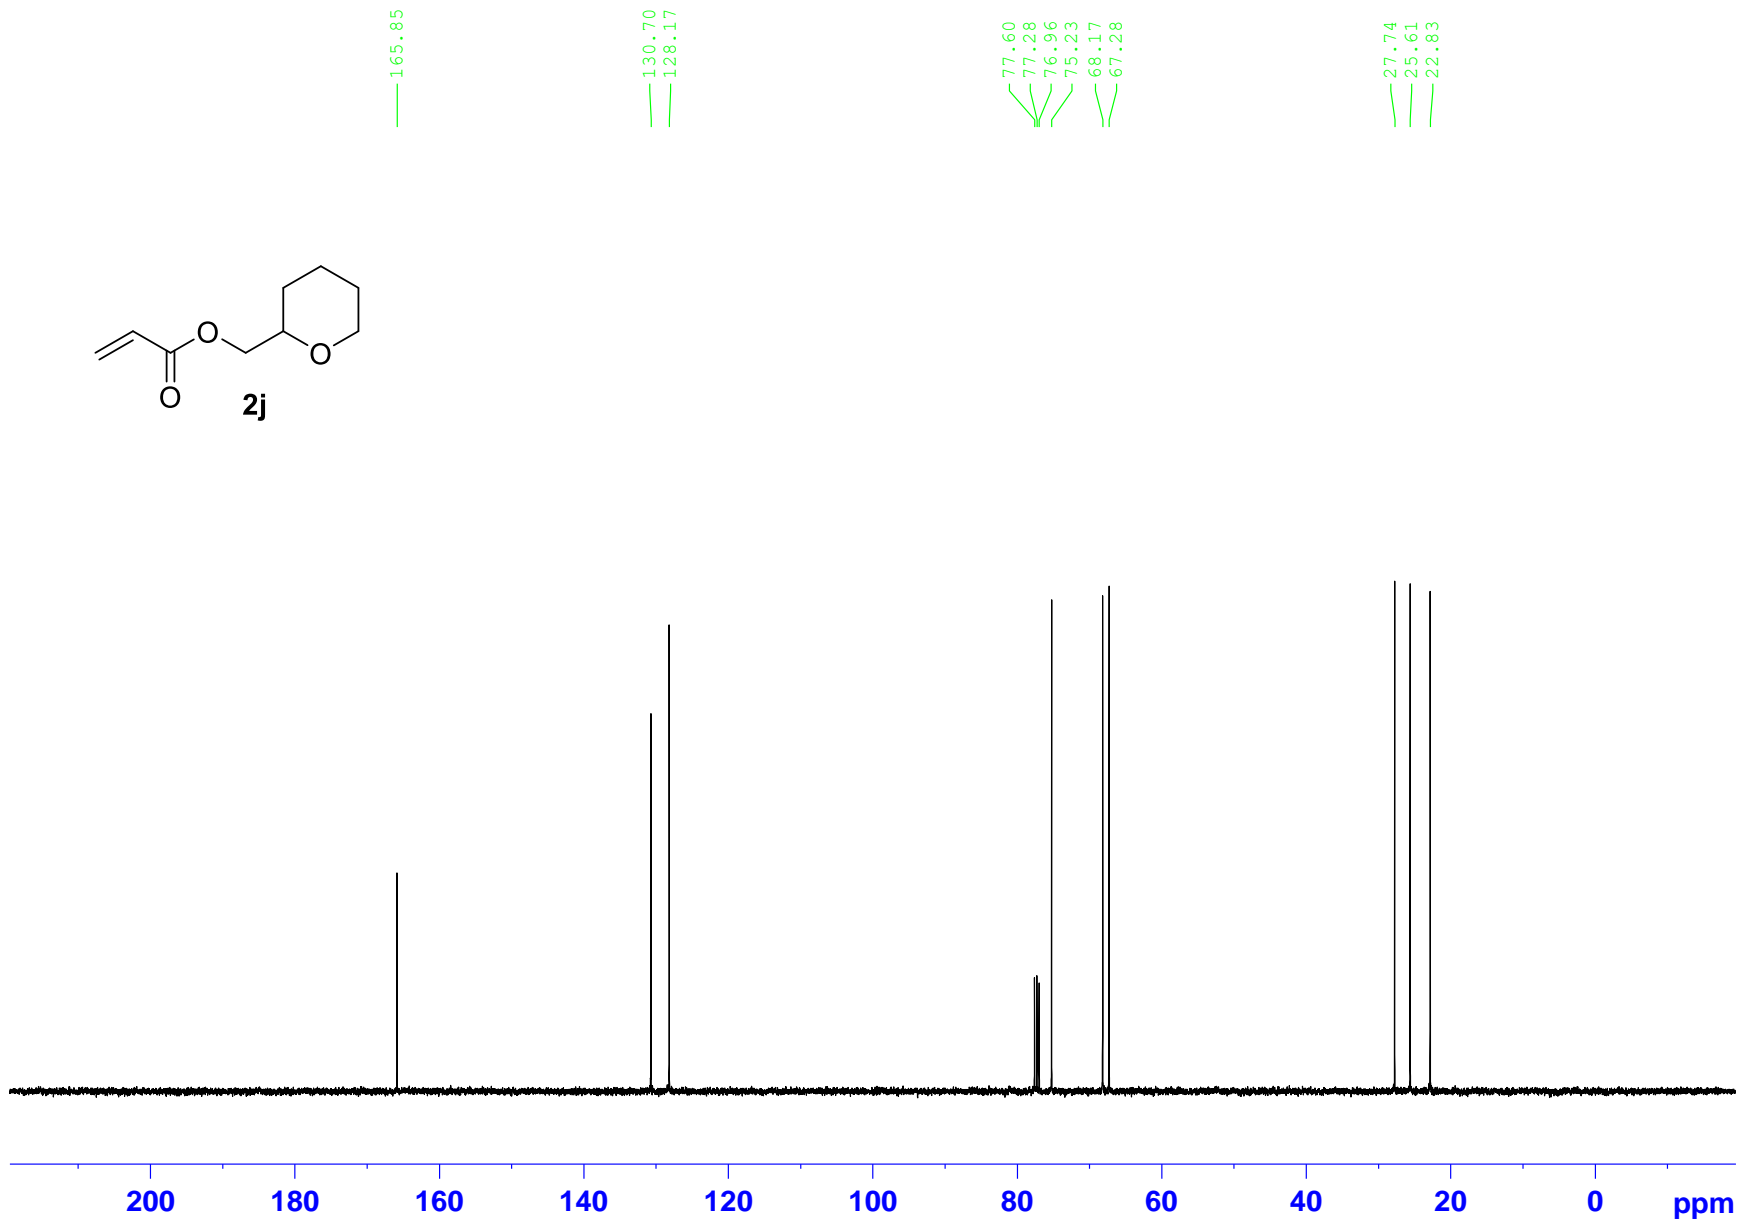

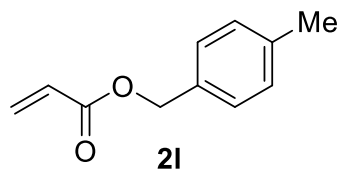

7.362  
7.341  
7.249  
7.229  
6.537  
6.533  
6.494  
6.490  
6.266  
6.239  
6.222  
6.196  
5.881  
5.877  
5.855  
5.851  
5.235

— 2.418

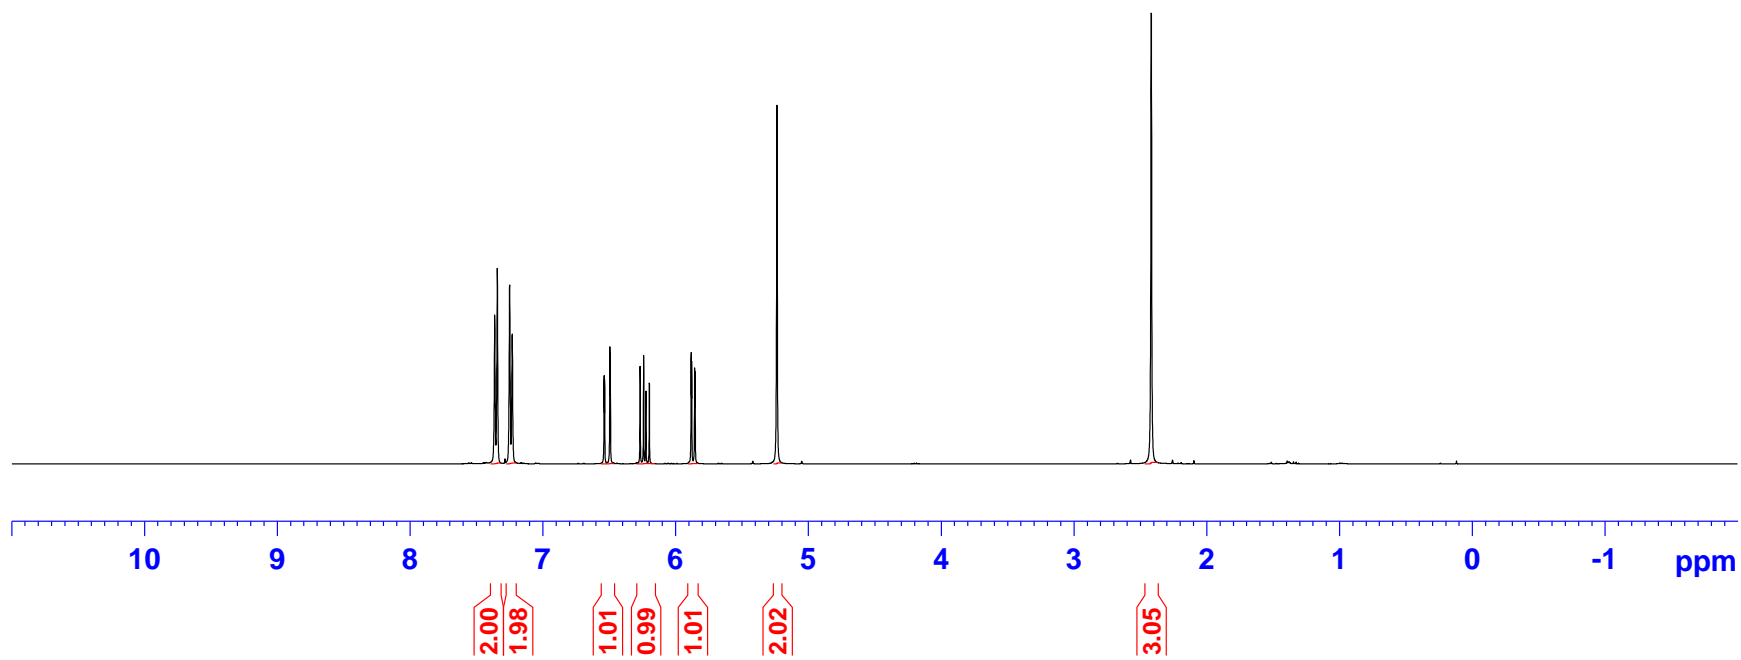

S189

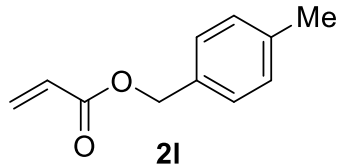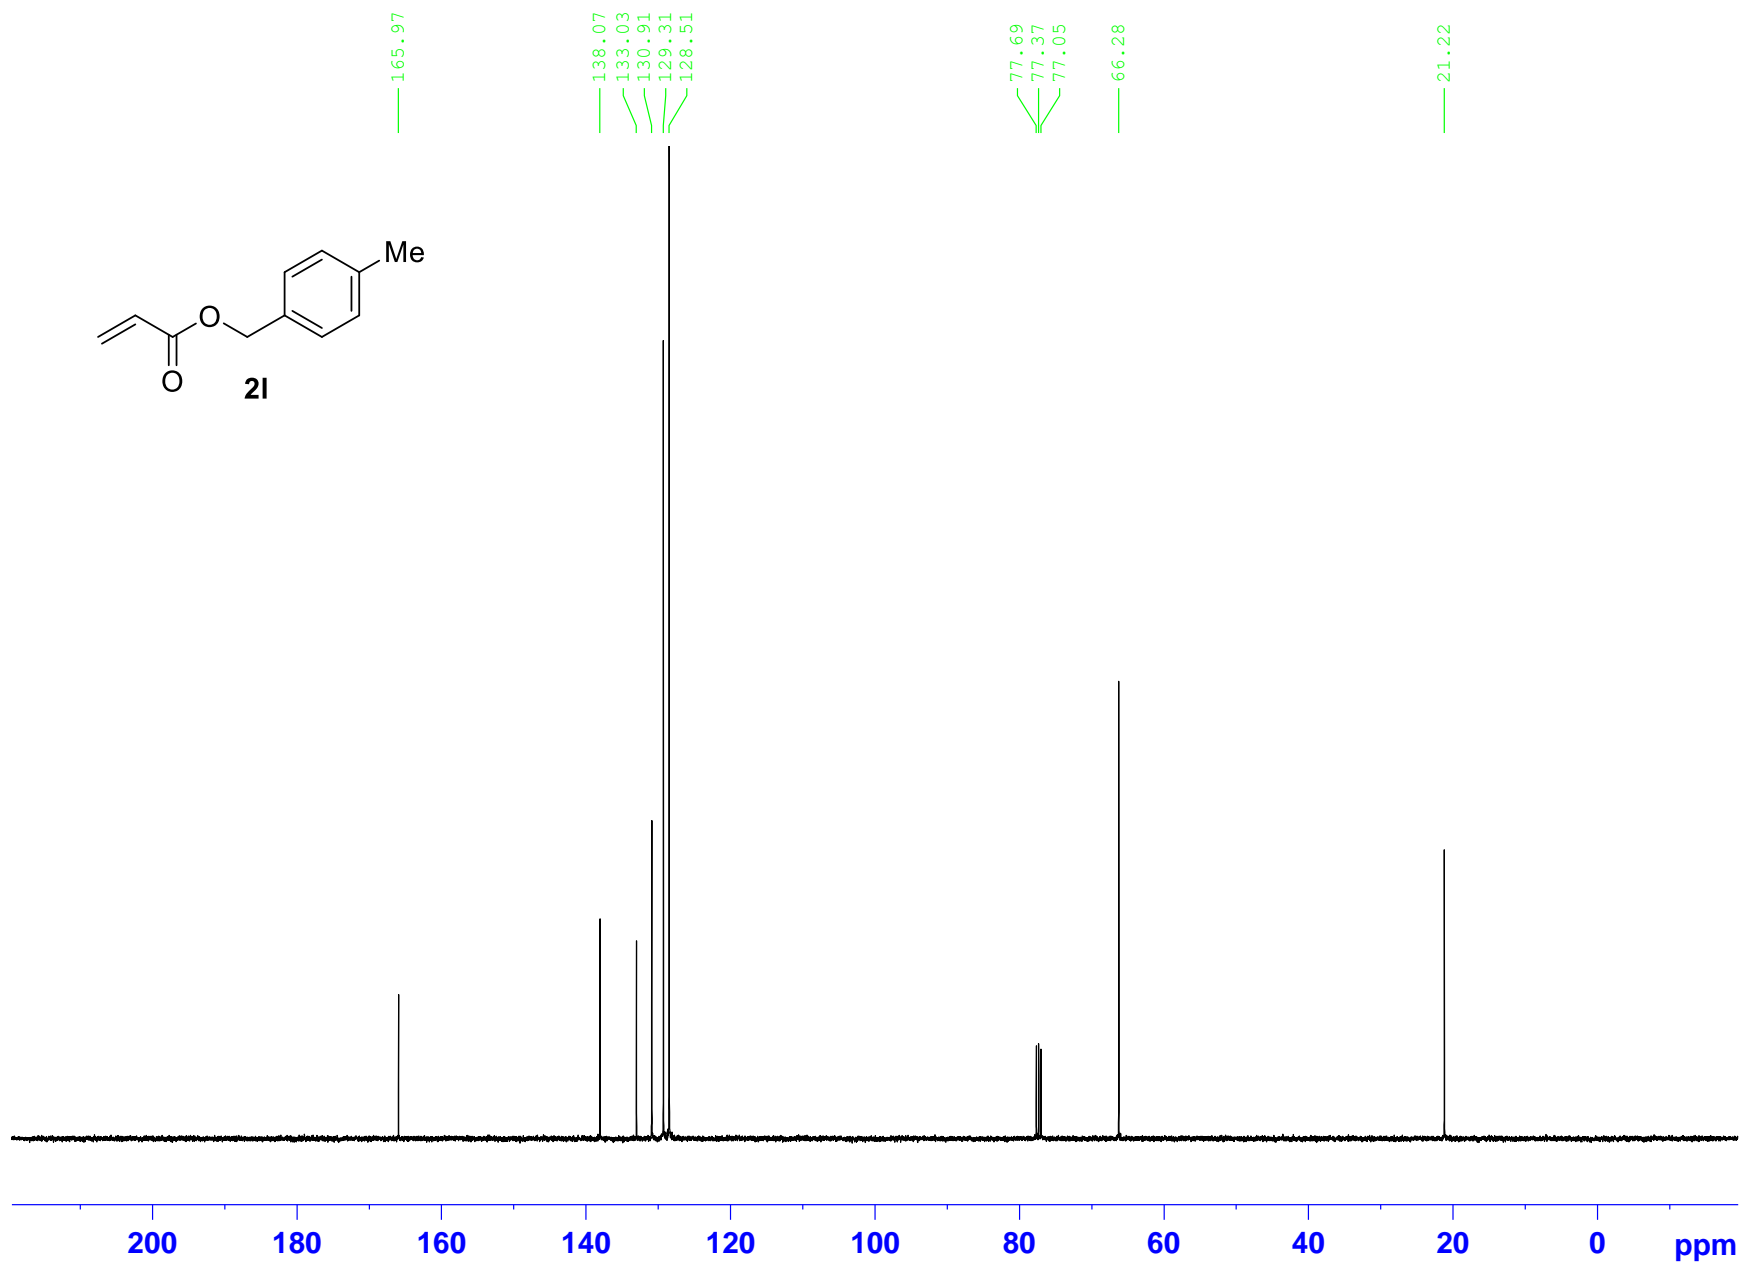

S190

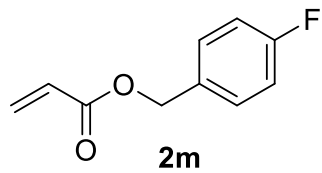

7.374  
7.369  
7.360  
7.352  
7.344  
7.339  
7.262  
7.064  
7.042  
7.020  
6.463  
6.460  
6.420  
6.417  
6.185  
6.159  
6.142  
6.116  
5.857  
5.854  
5.831  
5.828  
5.156

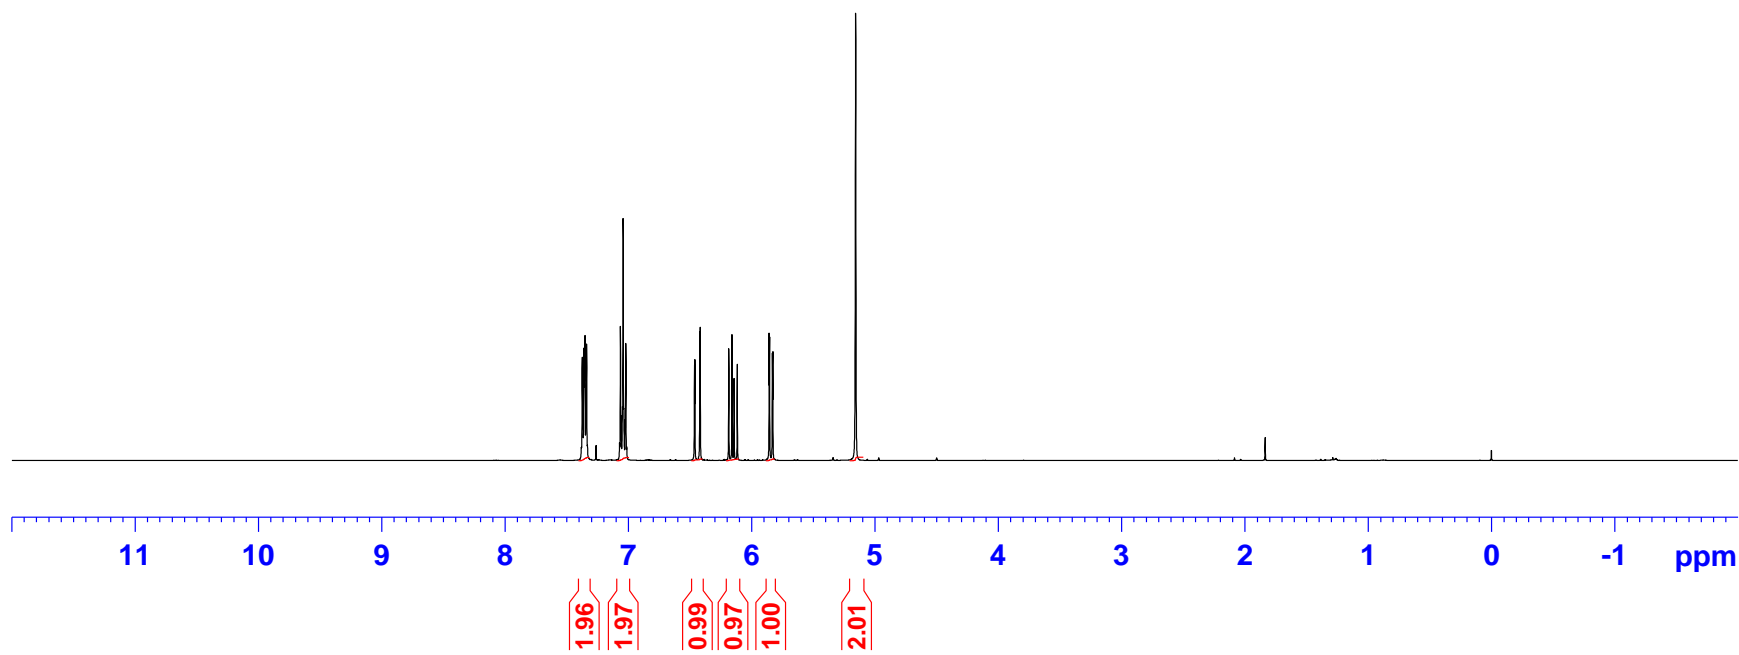

S191

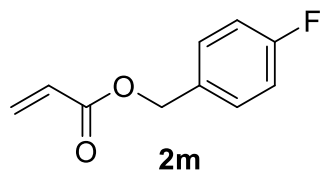

165.93  
163.89  
161.44

131.75  
131.72  
131.26  
130.32  
130.24  
128.20

115.60  
115.39

77.43  
77.11  
76.79

65.60

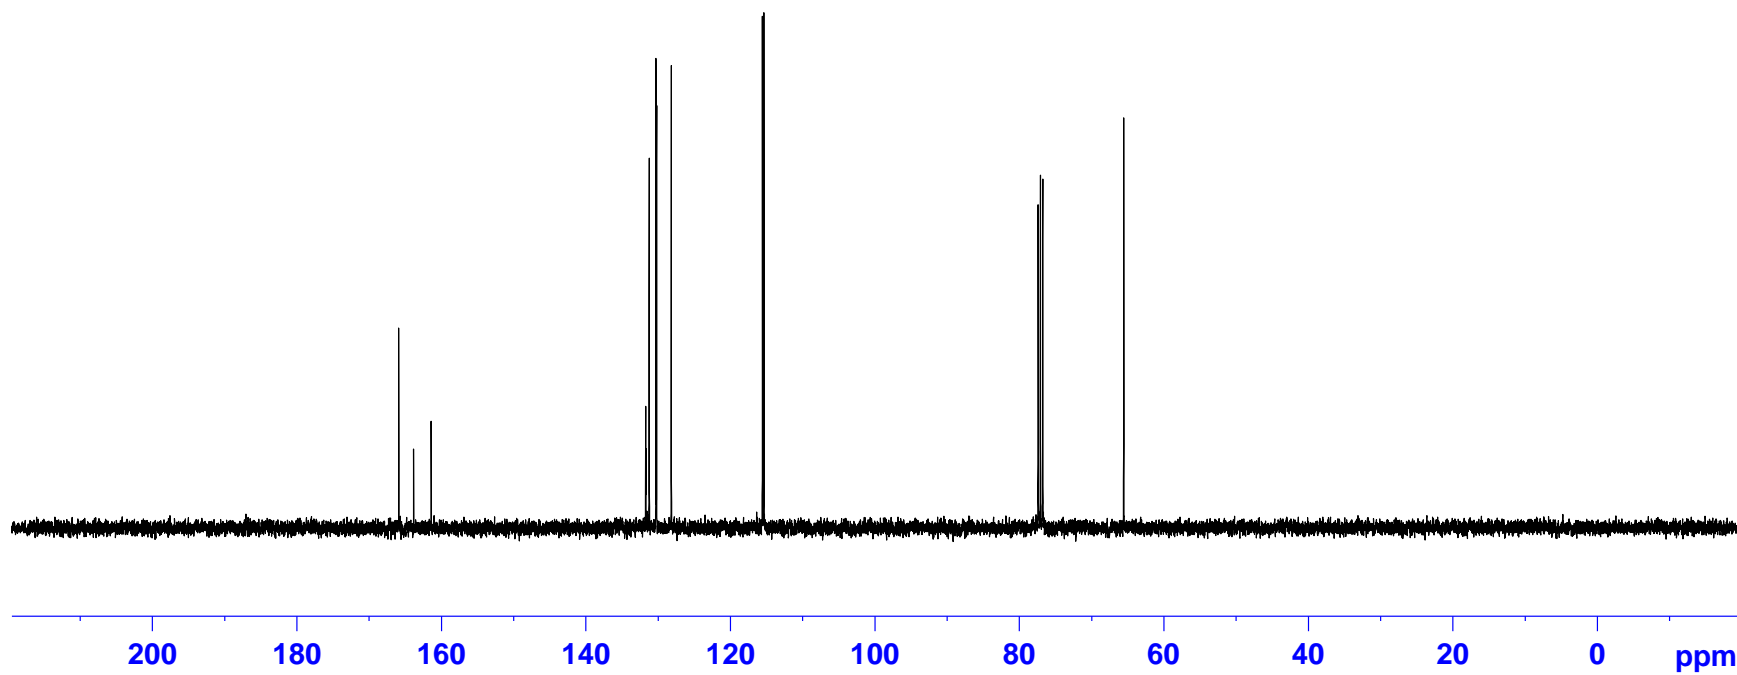



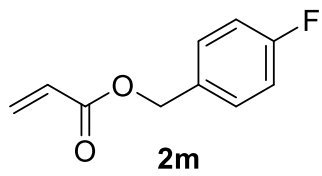

— -113.582

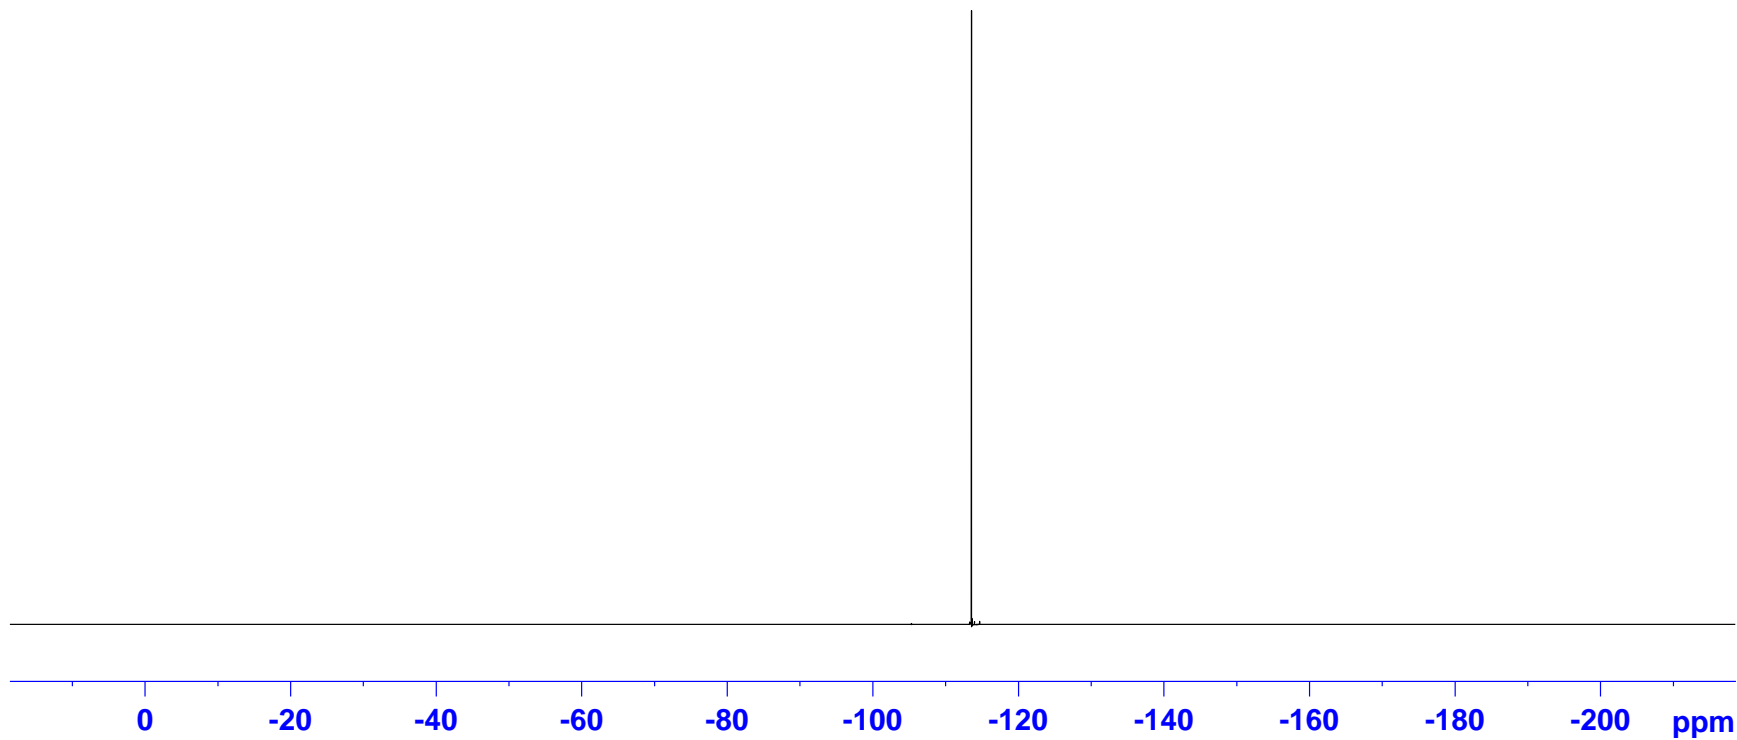

S193

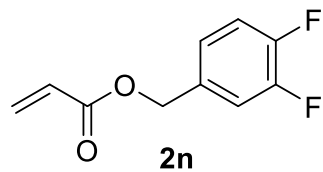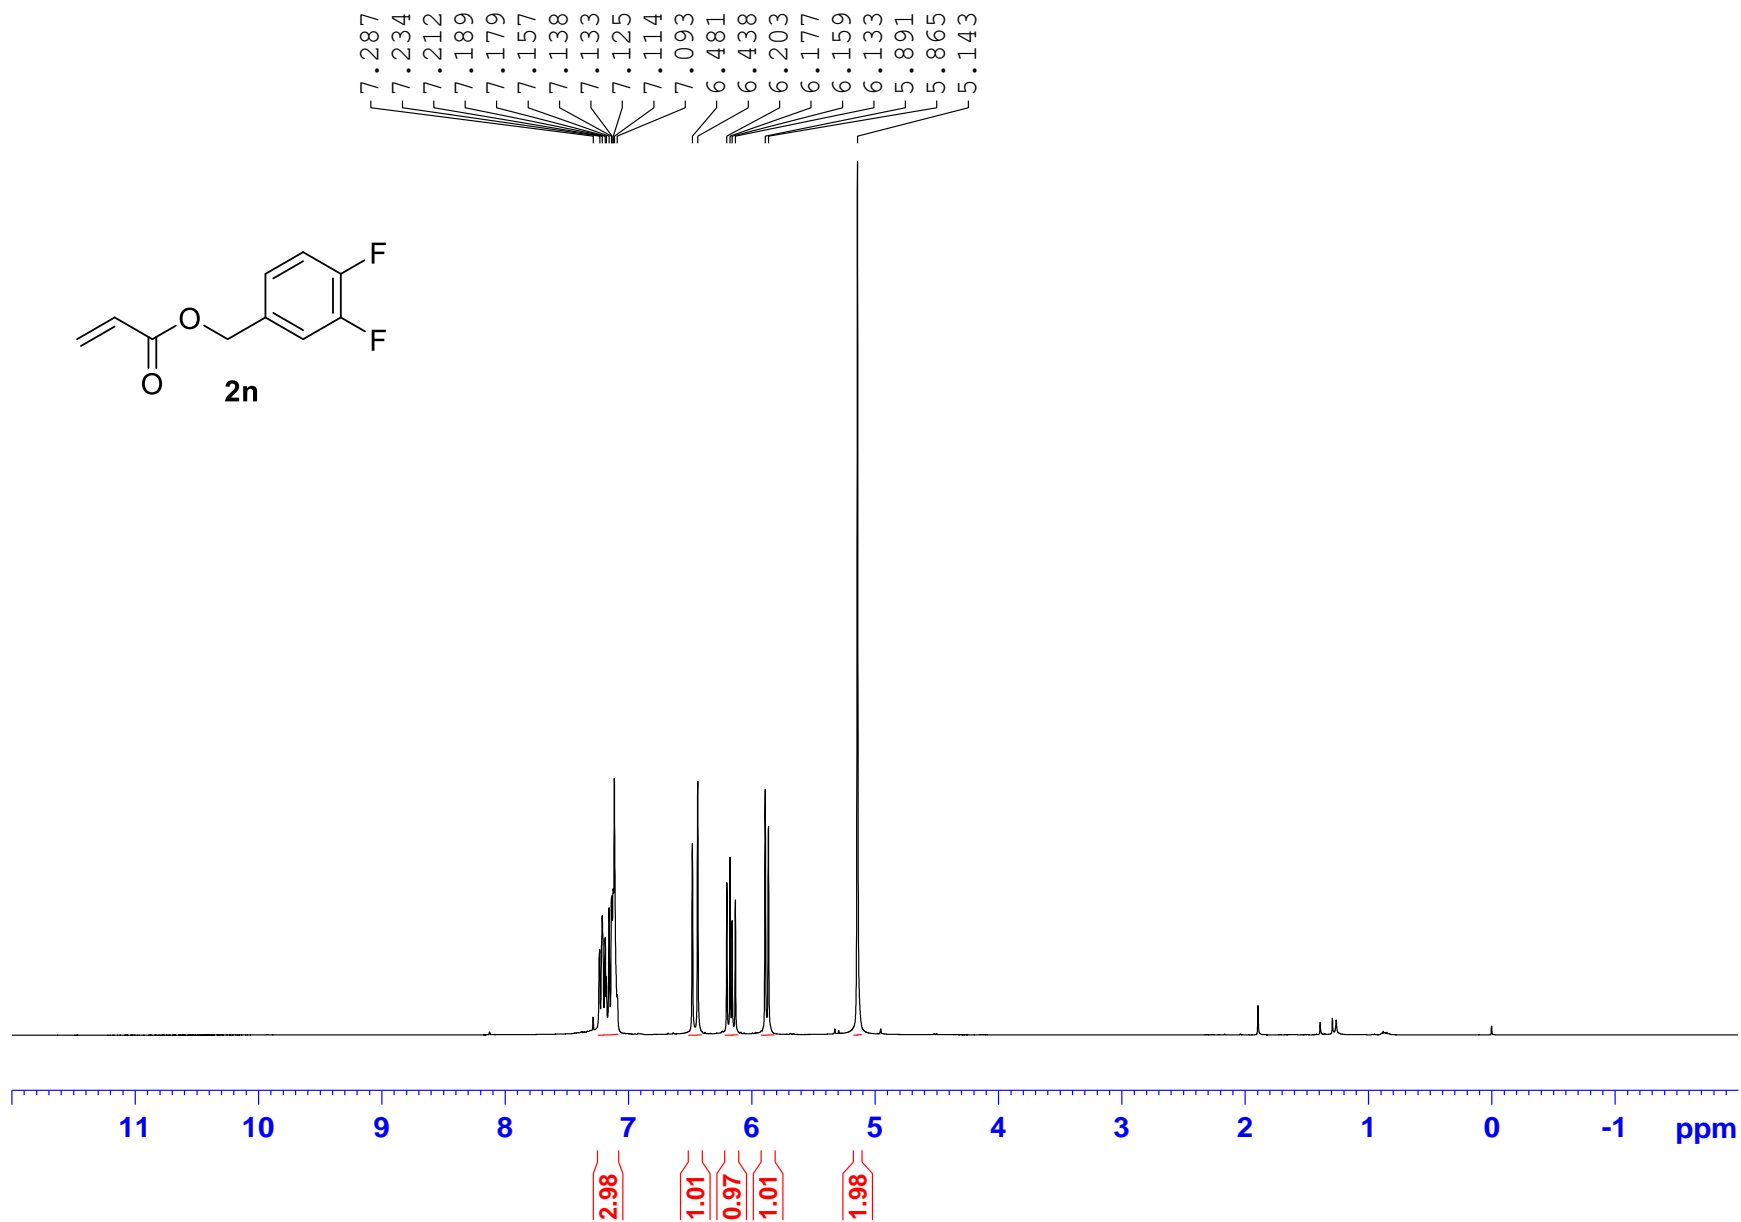

S194

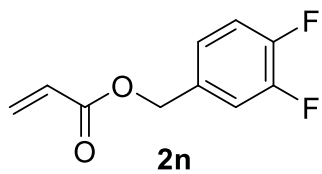

165.72  
151.54  
151.47  
151.42  
151.35  
149.08  
149.00  
148.95  
148.88  
133.01  
132.96  
132.92  
131.48  
127.95  
124.37  
124.33  
124.30  
124.26  
117.42  
117.33  
117.24  
117.15

77.41  
77.09  
76.77

64.91

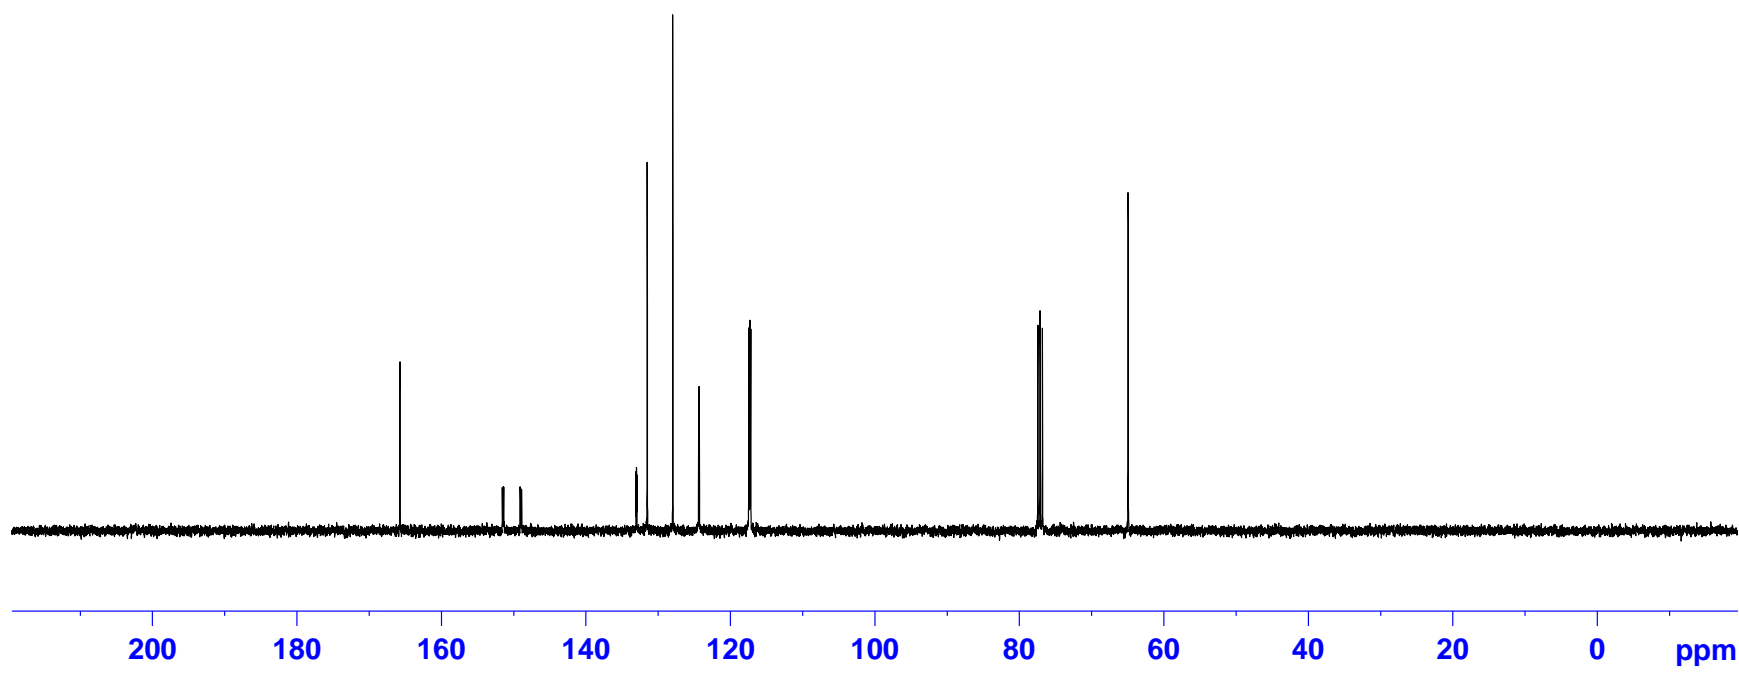

S195

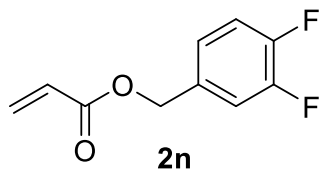

-137.223  
-137.280  
-138.249  
-138.305

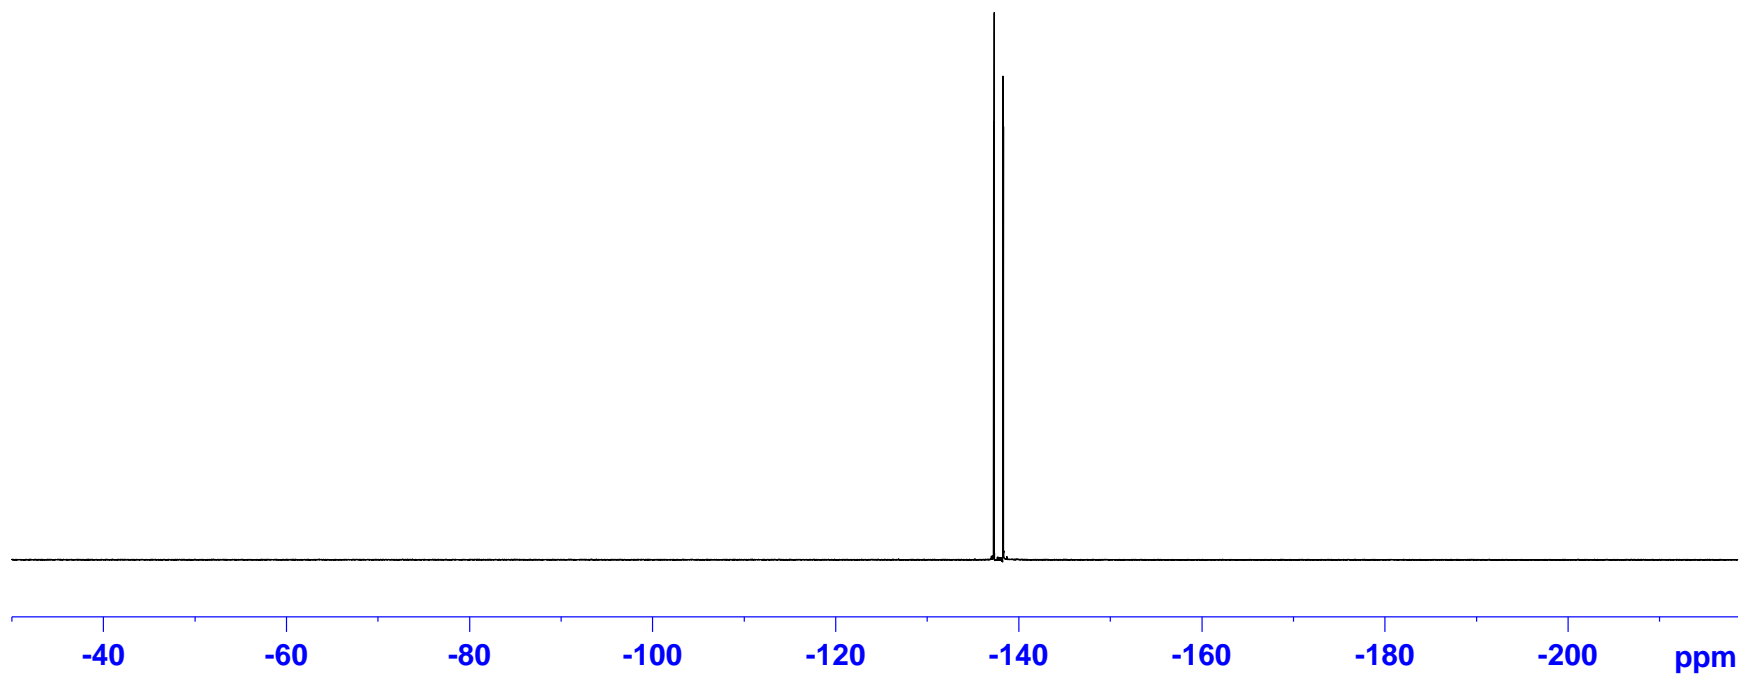

7.356  
7.334  
7.266  
7.052  
7.045  
7.030  
7.024  
6.999  
6.993  
2.962  
2.952  
2.940  
2.931  
2.557  
2.535  
2.509  
2.488  
2.389  
2.384  
2.297  
2.184  
2.162  
2.137  
2.115  
2.105  
2.092  
2.075  
2.069  
2.062  
2.053  
2.039  
2.032  
2.000  
1.994  
1.977  
1.971  
1.665  
1.644  
1.636  
1.630  
1.621  
1.614  
1.608  
1.601  
1.576  
1.567  
1.558  
1.545  
1.539  
1.519  
1.501  
1.493  
1.471  
0.922

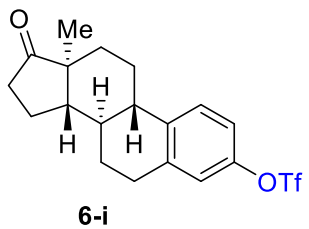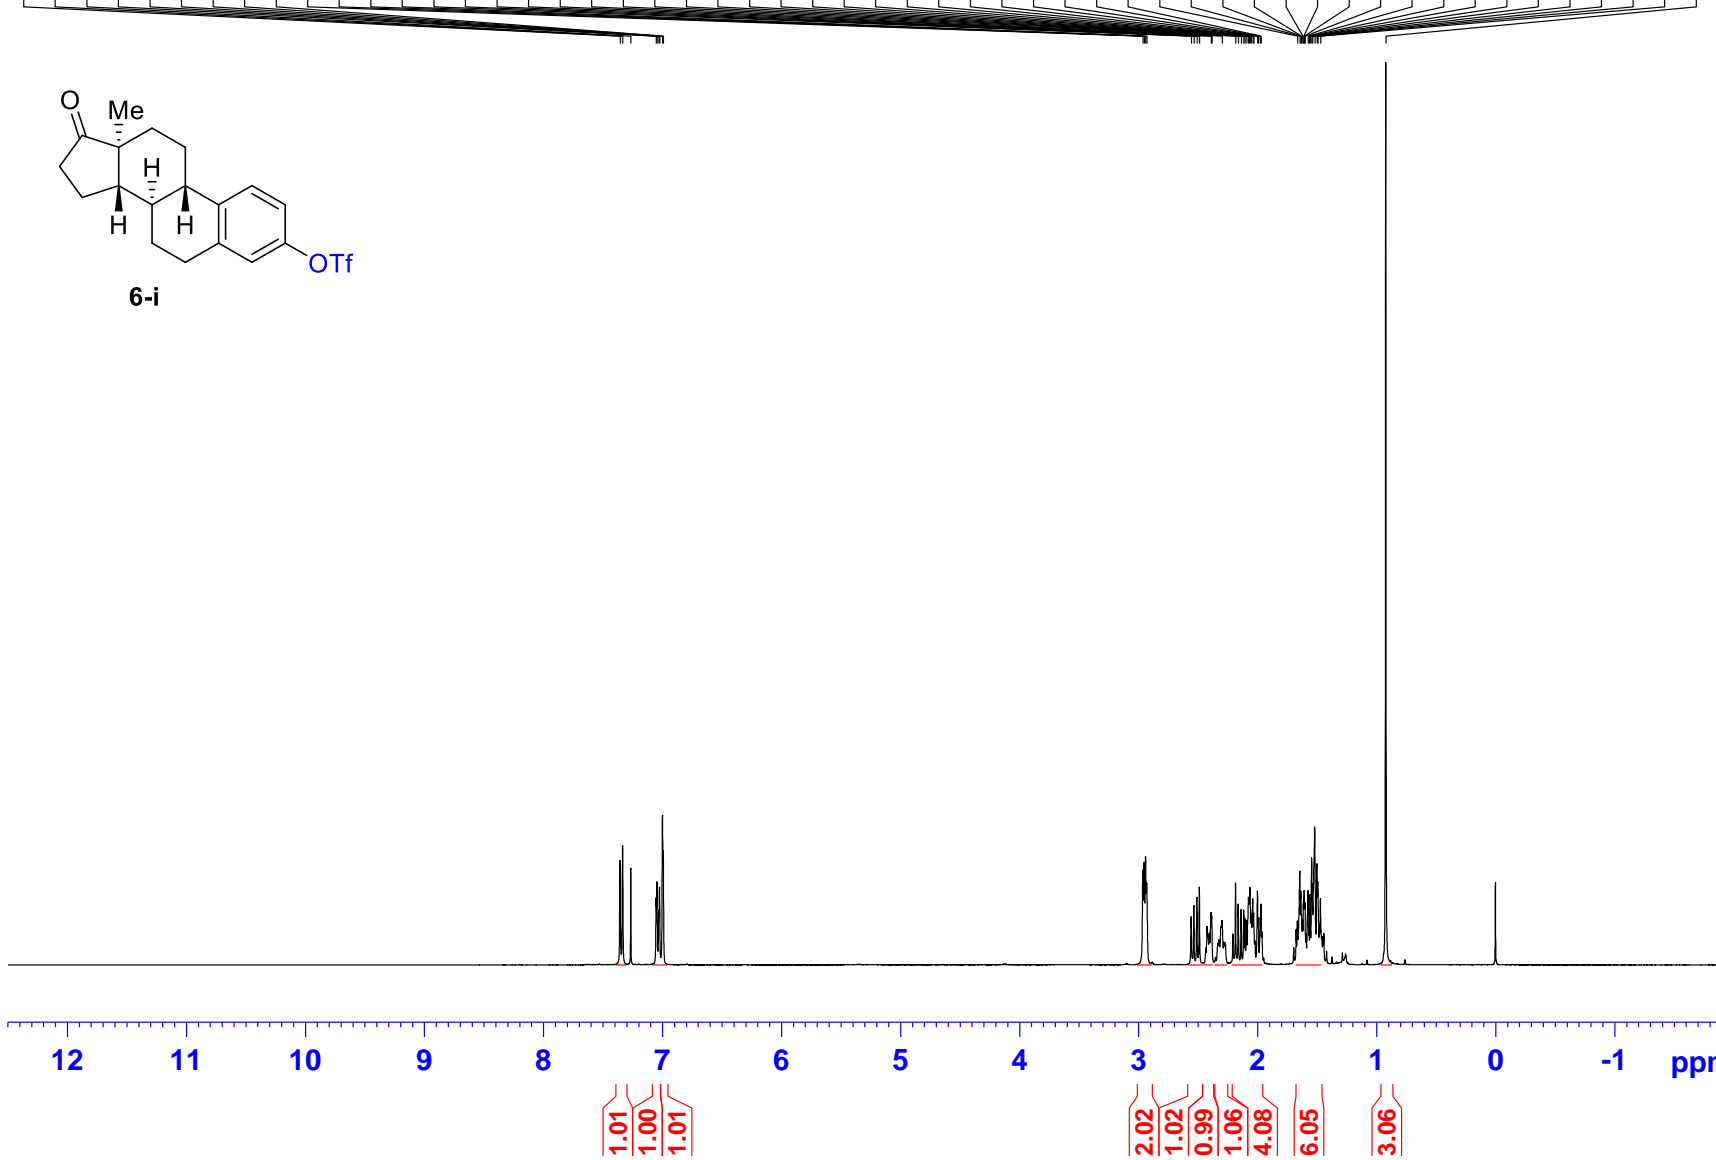

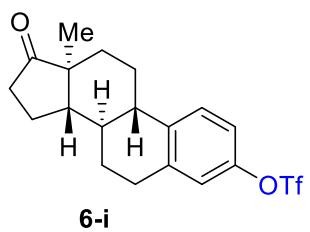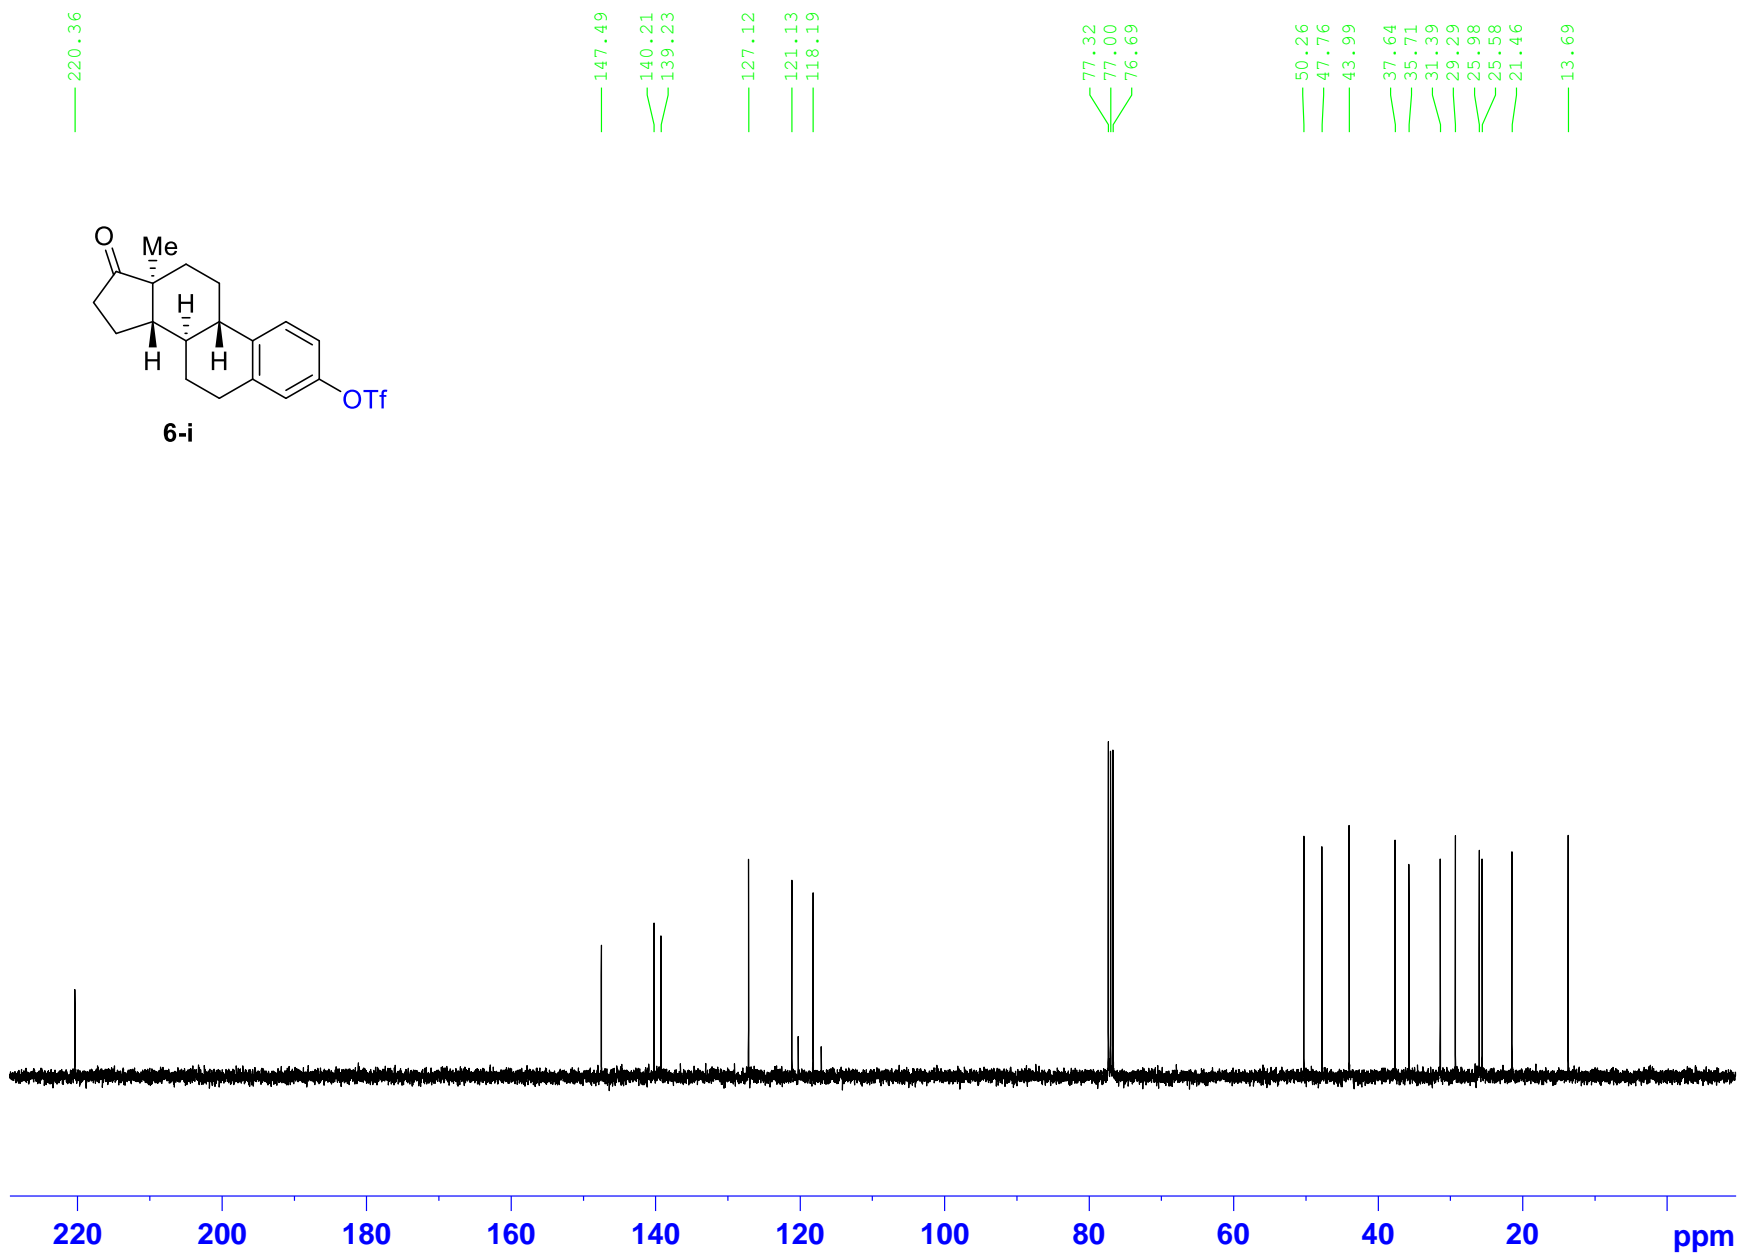

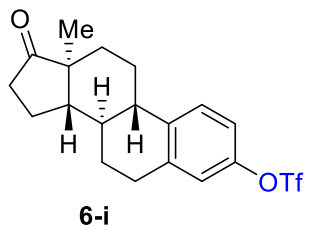

---72.956

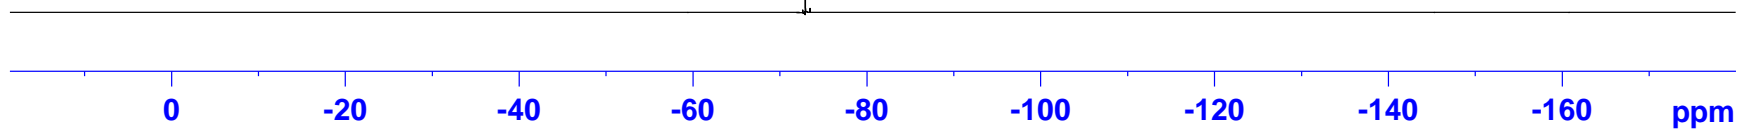

S199

7.593  
7.573  
7.547  
7.311  
7.292  
7.260  
3.764  
2.950  
2.940  
2.928  
2.539  
2.516  
2.491  
2.470  
2.439  
2.432  
2.333  
2.325  
2.168  
2.145  
2.121  
2.099  
2.093  
2.080  
2.065  
2.049  
2.042  
2.036  
2.029  
2.007  
2.000  
1.982  
1.975  
1.958  
1.952  
1.657  
1.635  
1.626  
1.618  
1.604  
1.576  
1.554  
1.541  
1.522  
1.514  
1.492  
1.483  
1.473  
1.450  
1.445  
1.423  
1.015  
0.906

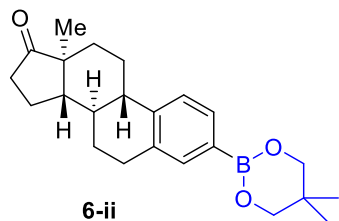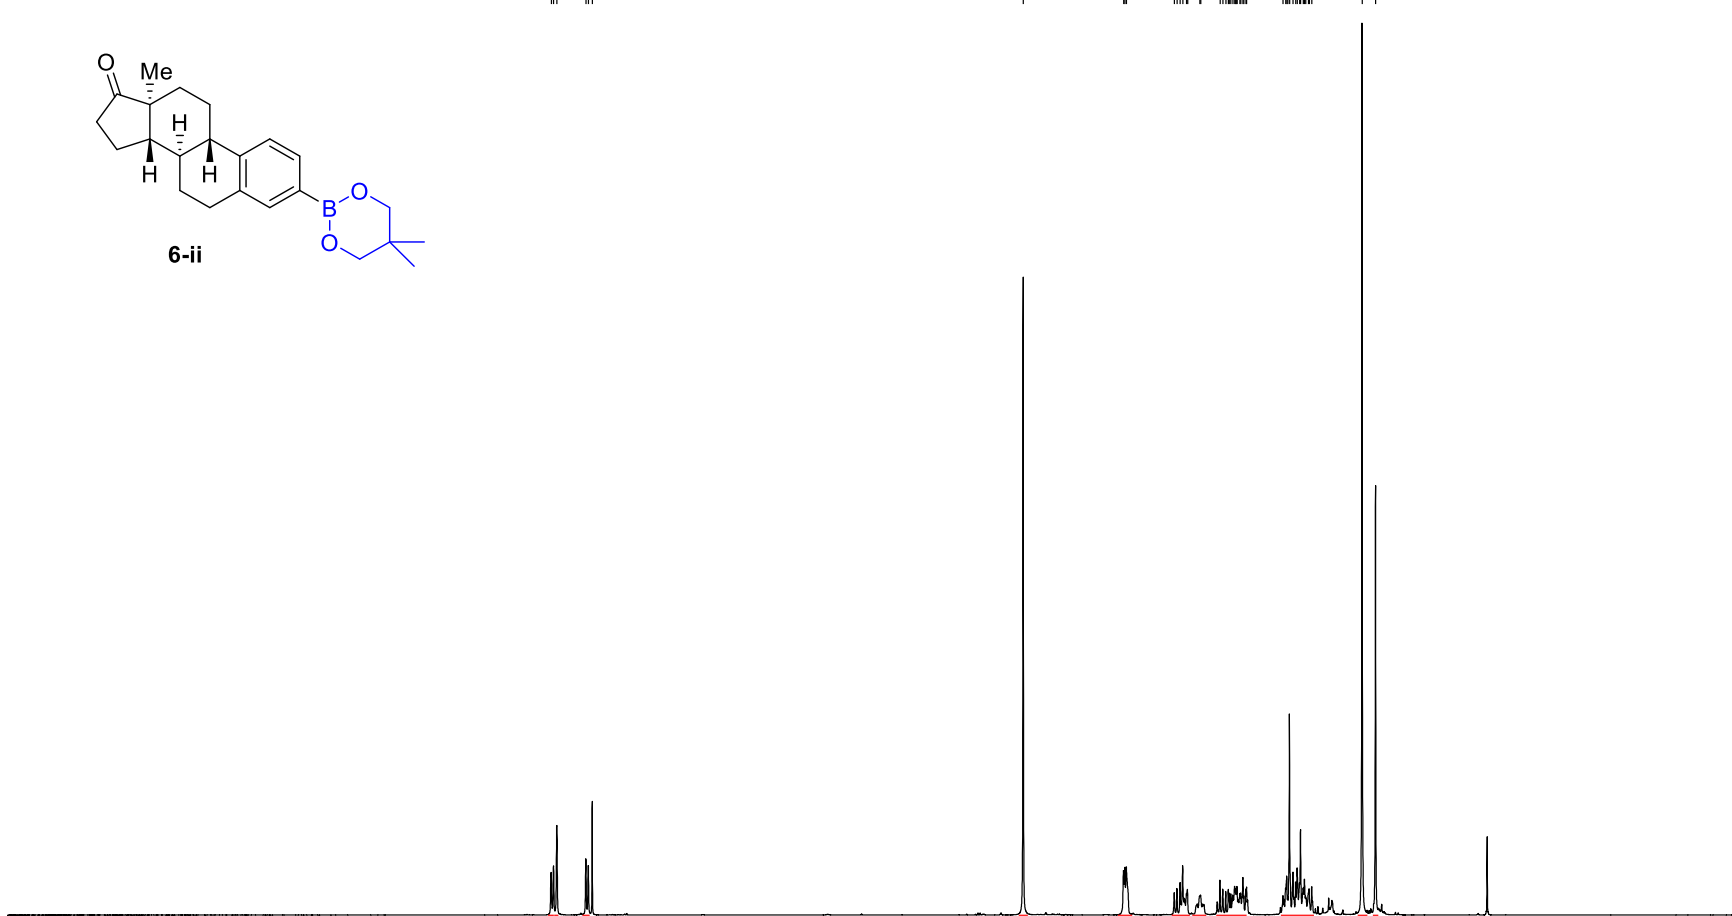

11 10 9 8 7 6 5 4 3 2 1 0 -1 ppm

0.98  
1.01  
1.00  
4.02  
2.03  
2.02  
1.06  
4.01  
7.07  
6.05  
3.06



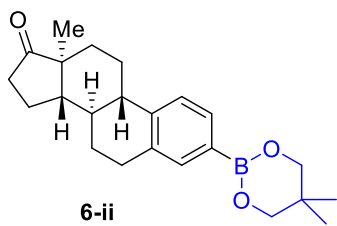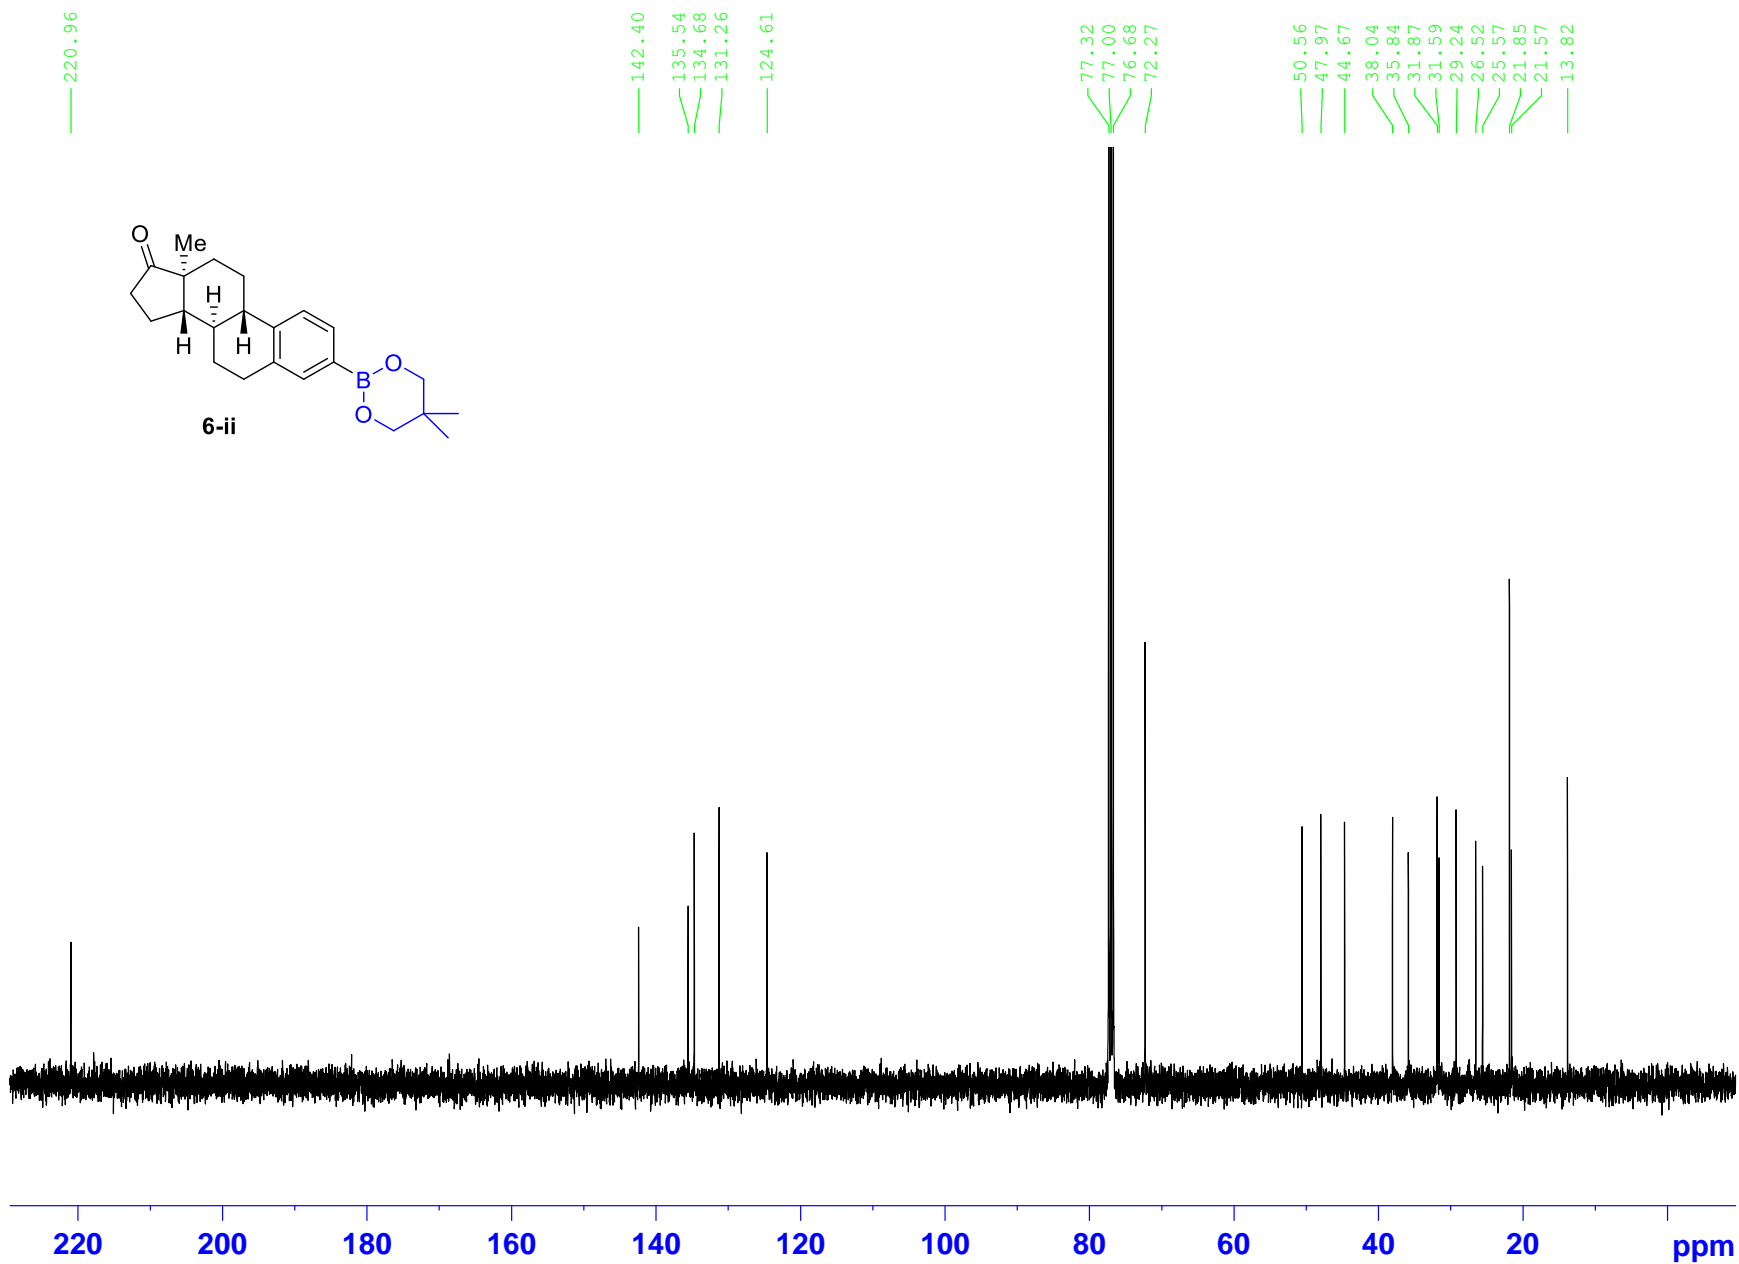

S201

7.464  
7.446  
7.263  
7.032  
7.011  
2.887  
2.877  
2.865  
2.855  
2.544  
2.522  
2.496  
2.475  
2.385  
2.374  
2.361  
2.352  
2.268  
2.242  
2.226  
2.193  
2.171  
2.148  
2.123  
2.102  
2.088  
2.074  
2.058  
2.052  
2.046  
2.035  
2.023  
2.017  
2.005  
1.992  
1.973  
1.963  
1.955  
1.949  
1.656  
1.647  
1.603  
1.596  
1.567  
1.562  
1.536  
1.524  
1.502  
1.478  
1.455  
1.446  
1.432  
1.426  
1.401  
0.906

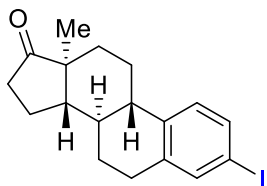

6-iii

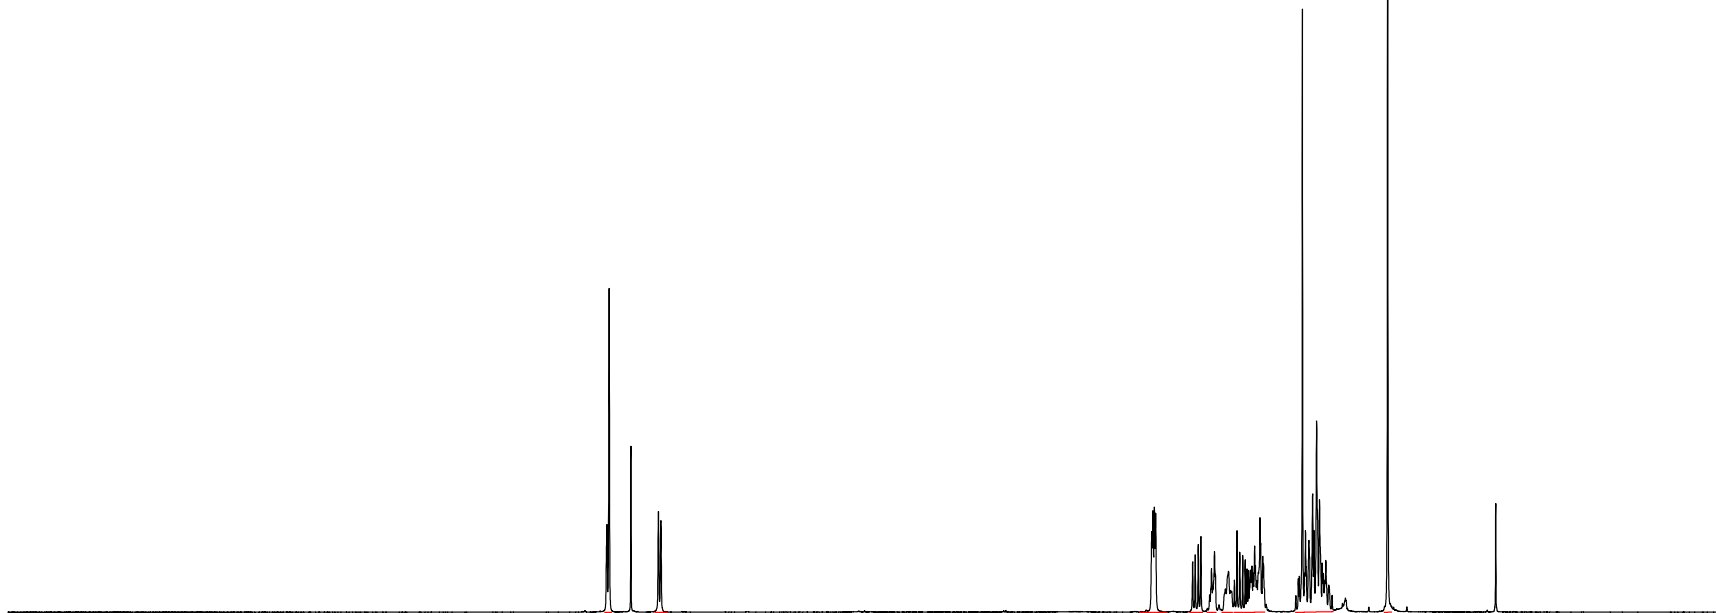

12 11 10 9 8 7 6 5 4 3 2 1 0 -1 ppm

1.92  
1.00  
2.02  
1.00  
0.95  
1.01  
4.04  
7.53  
3.00

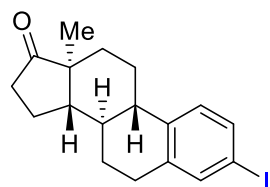

6-iii

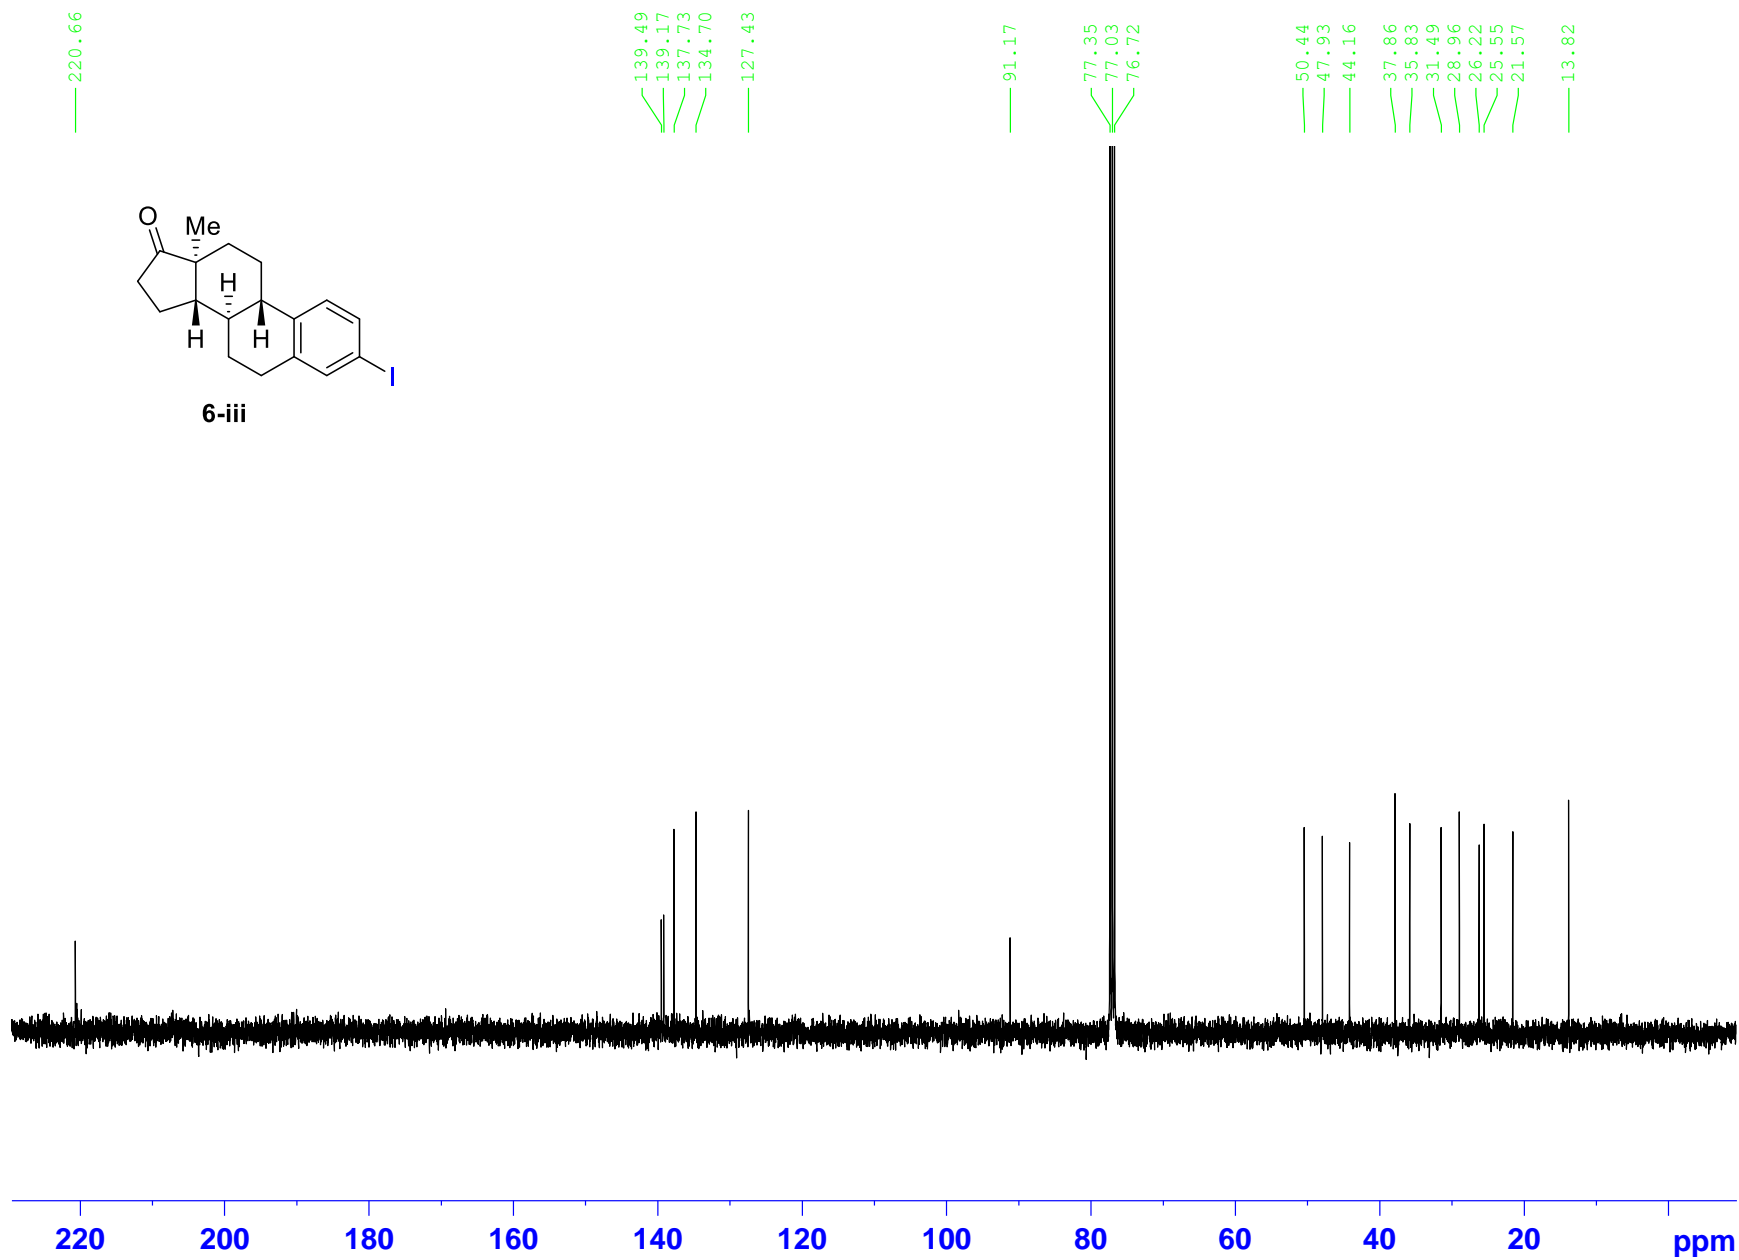

9.820  
7.259  
7.236  
7.216  
6.998  
6.978  
6.941  
2.922  
2.903  
2.885  
2.788  
2.770  
2.754  
2.751  
2.539  
2.516  
2.491  
2.470  
2.398  
2.275  
2.166  
2.144  
2.119  
2.098  
2.092  
2.079  
2.063  
2.049  
2.039  
2.032  
2.028  
2.009  
2.003  
1.973  
1.966  
1.950  
1.944  
1.629  
1.621  
1.614  
1.606  
1.600  
1.591  
1.586  
1.549  
1.537  
1.513  
1.506  
1.490  
1.483  
1.478  
1.467  
1.444  
1.438  
0.904

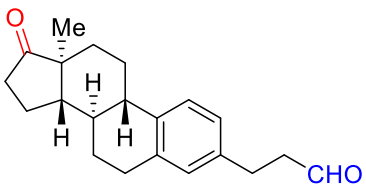

6a

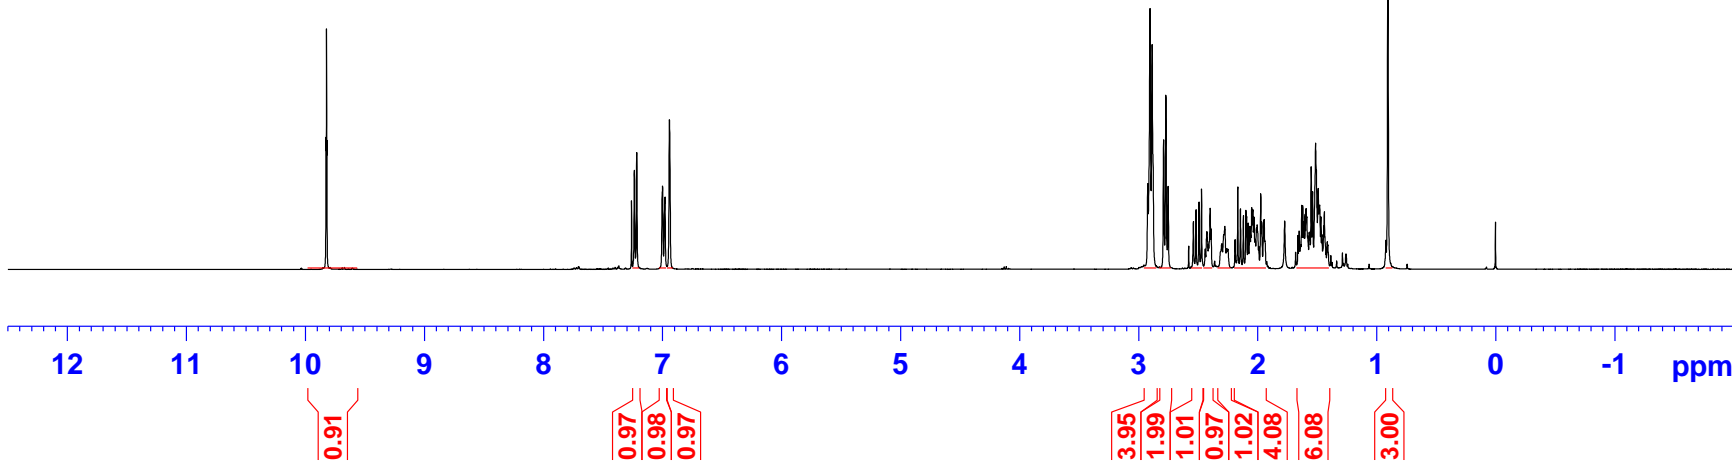

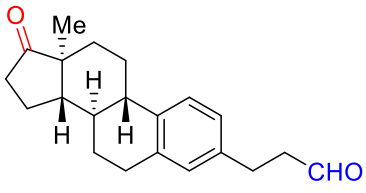

6a

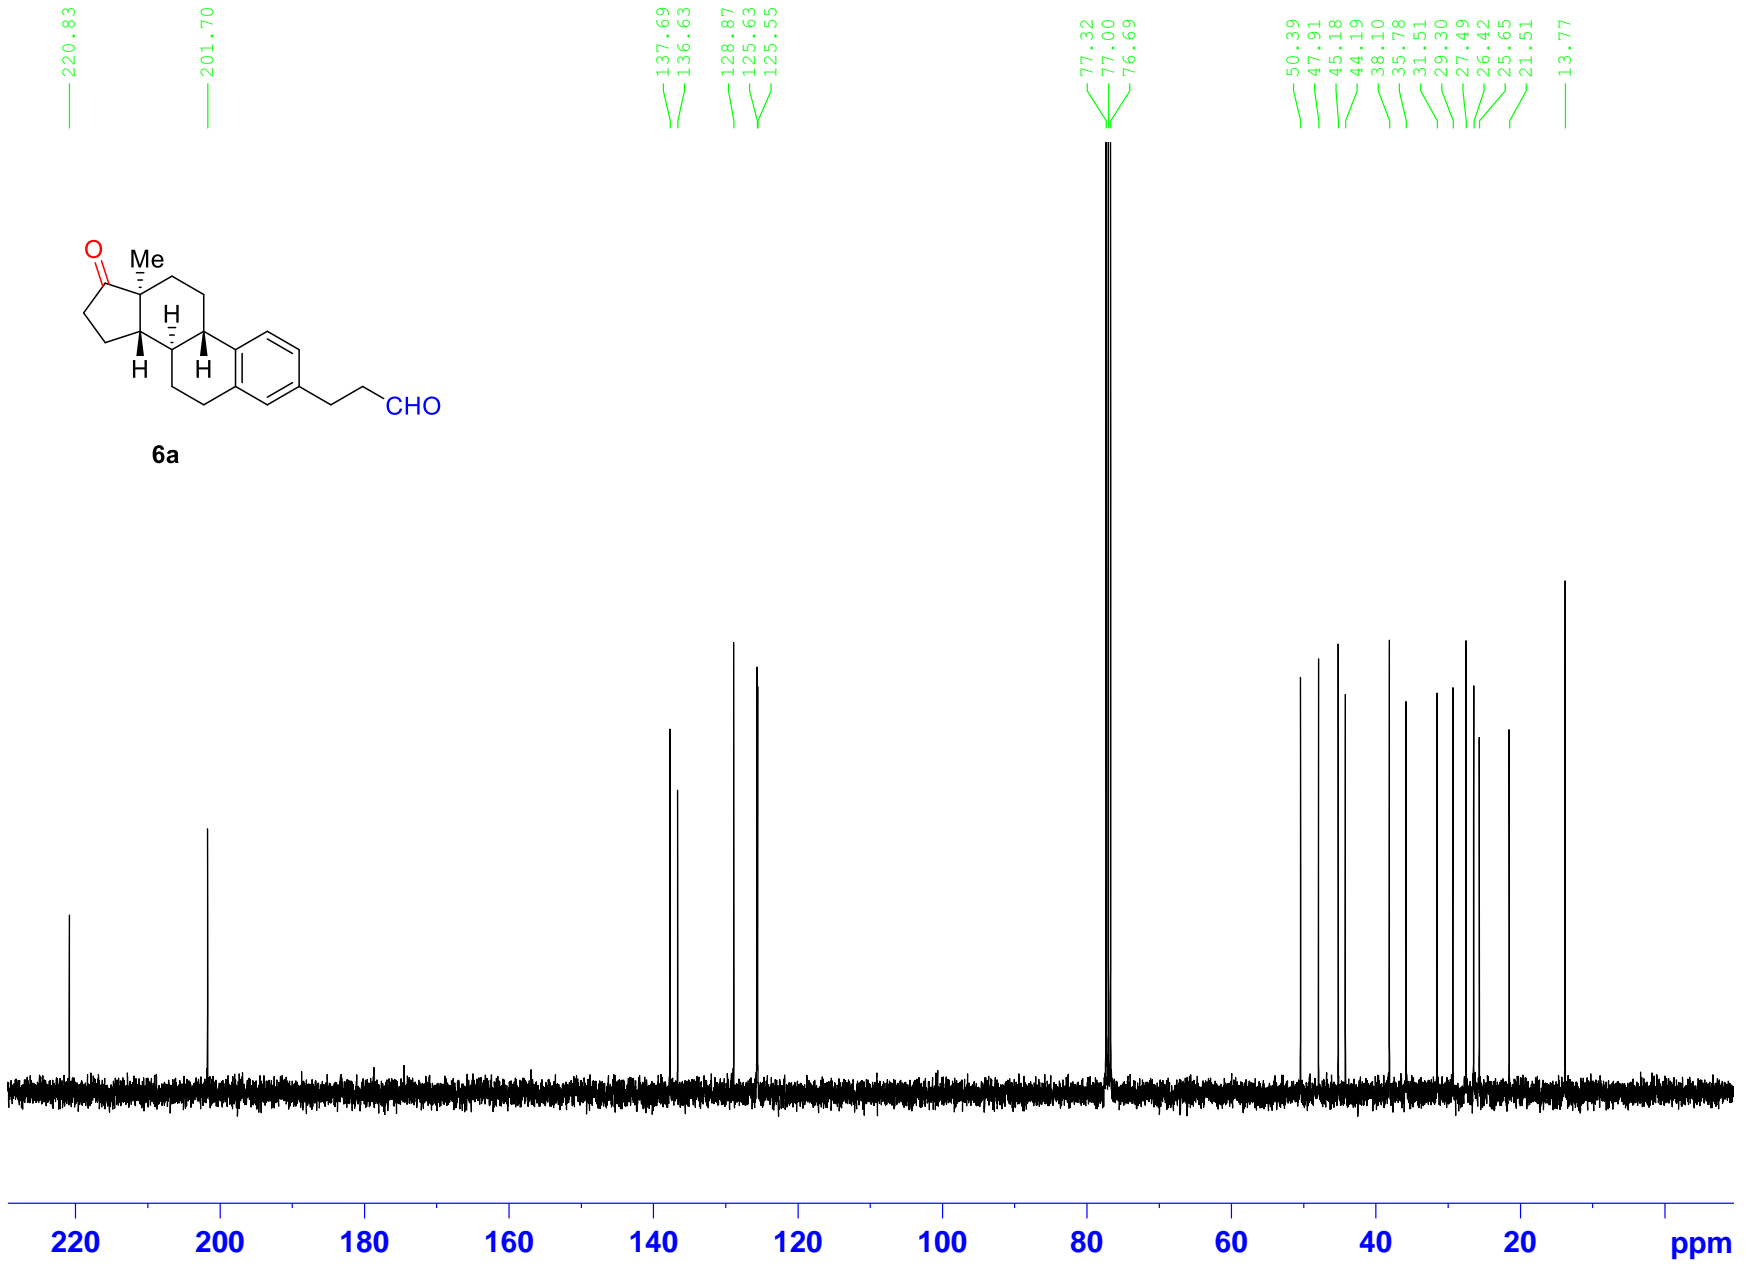

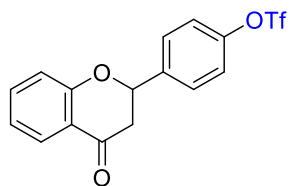

5-i

7.953  
7.949  
7.933  
7.929  
7.610  
7.588  
7.582  
7.560  
7.555  
7.541  
7.538  
7.521  
7.516  
7.379  
7.372  
7.367  
7.350  
7.343  
7.262  
7.109  
7.107  
7.089  
7.077  
7.071  
7.069  
7.056  
5.549  
5.542  
5.516  
5.509  
3.074  
3.041  
3.032  
2.999  
2.938  
2.930  
2.896  
2.888

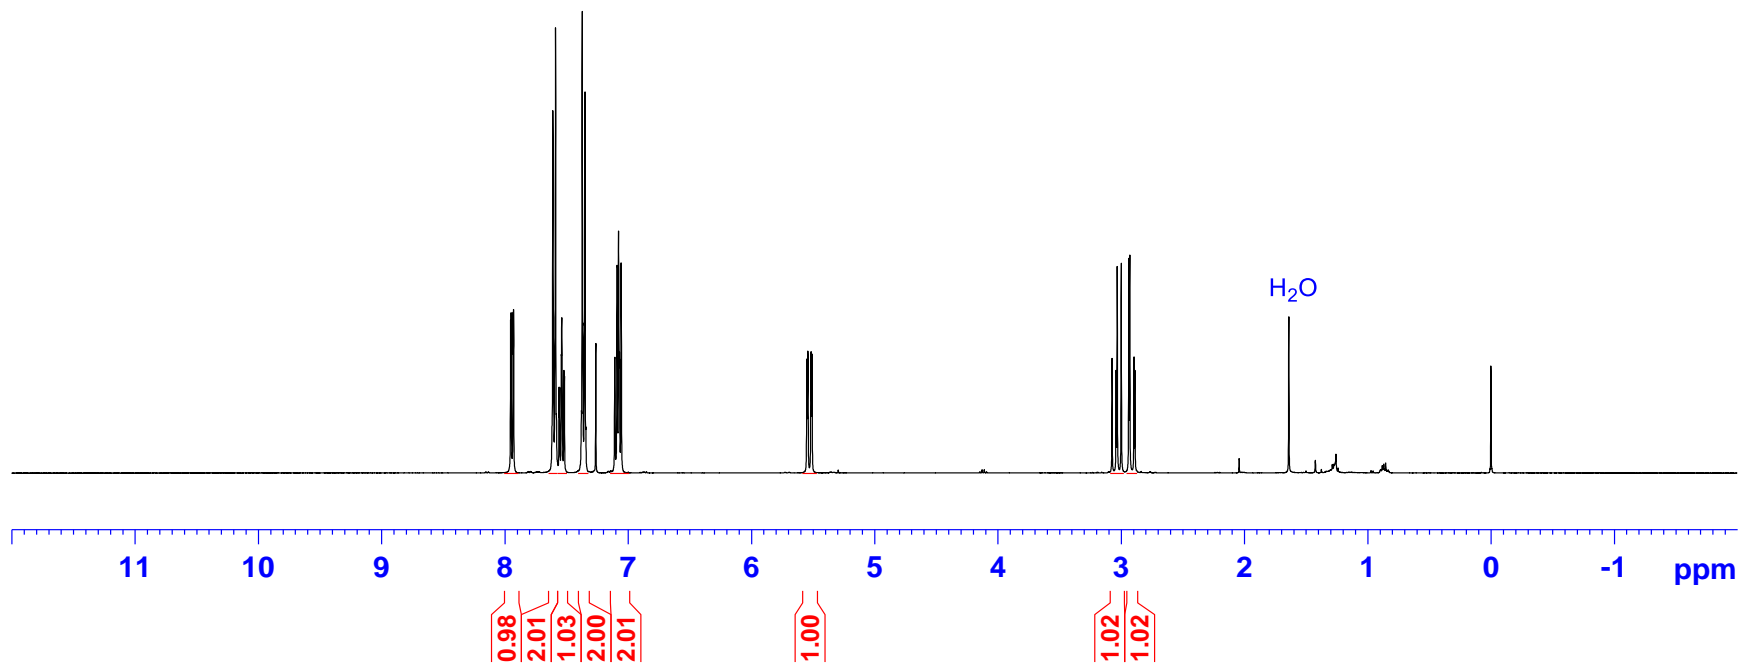

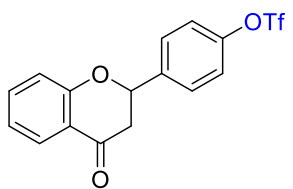

5-i

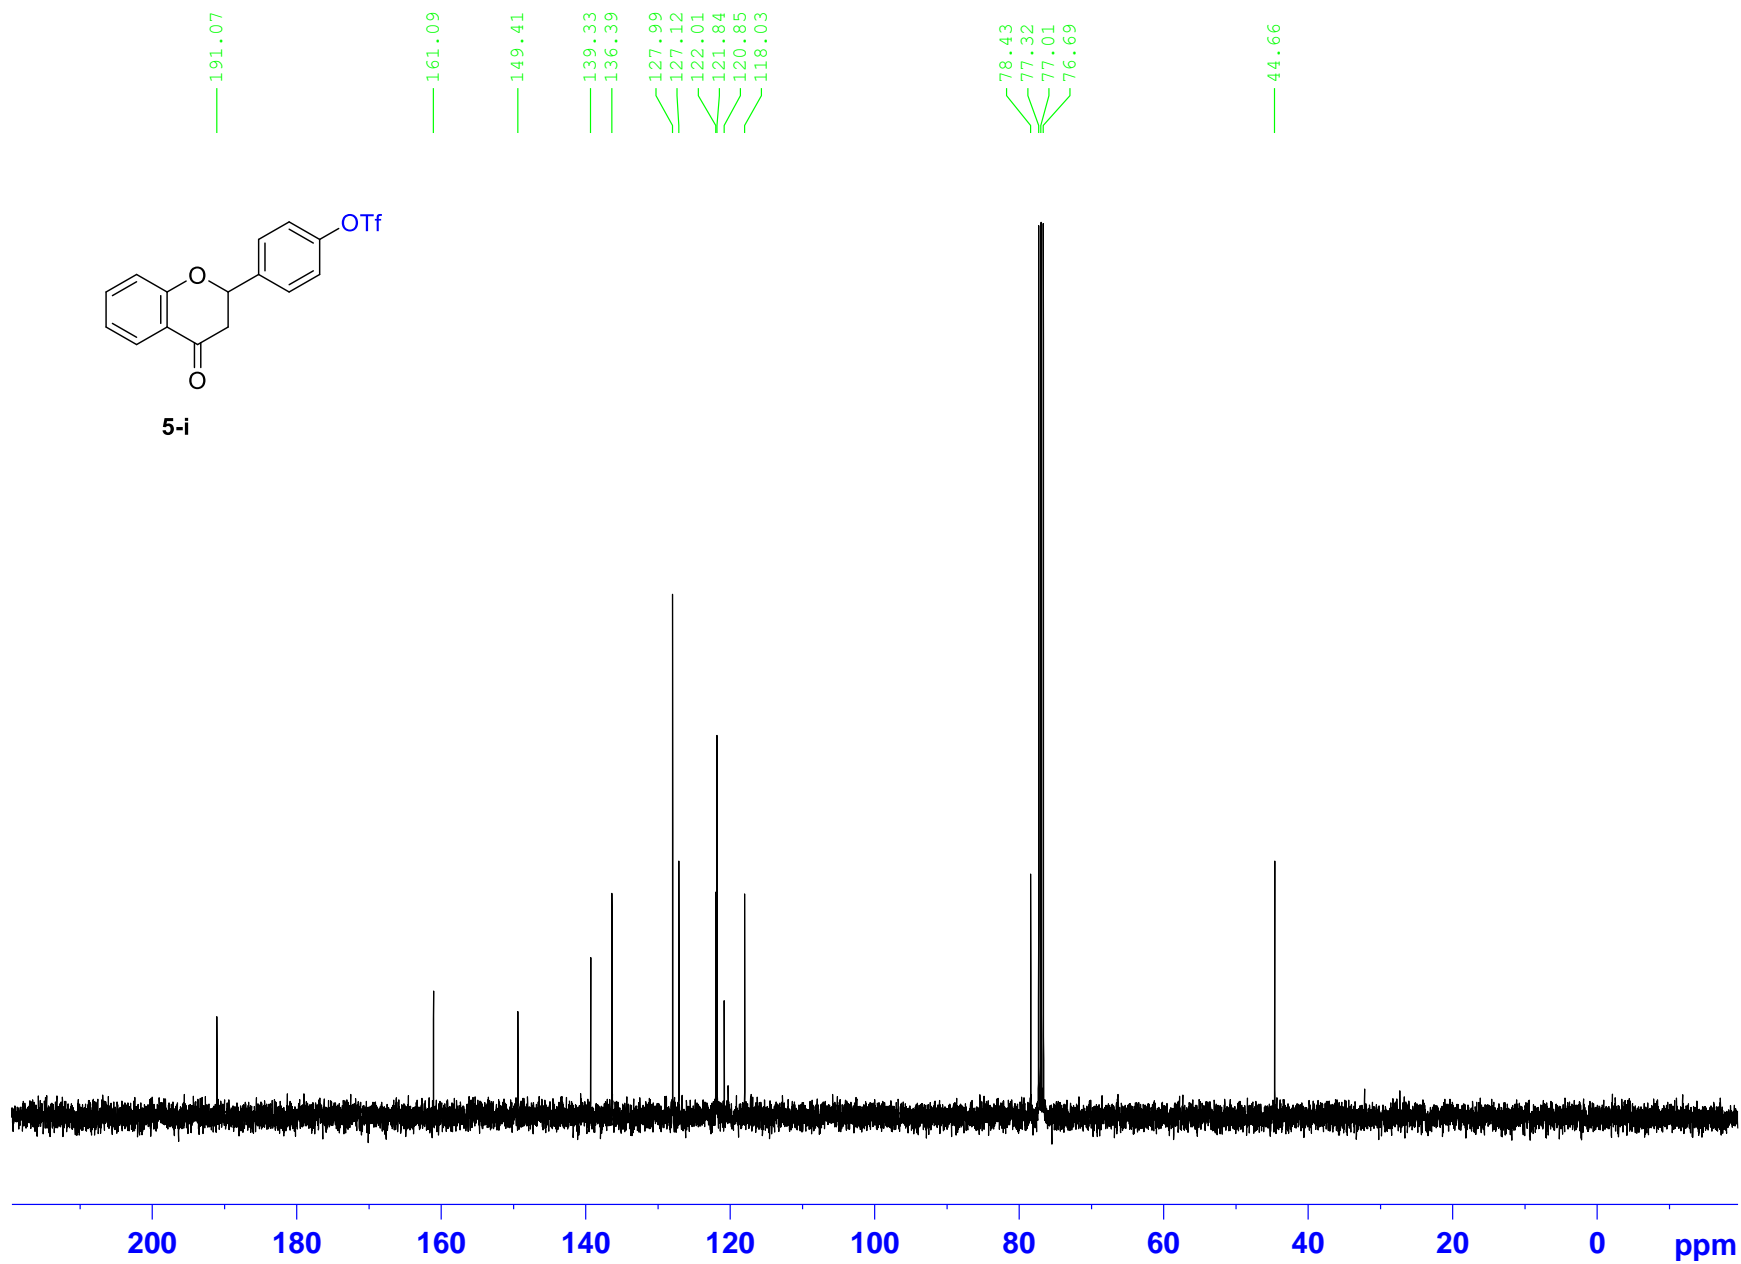

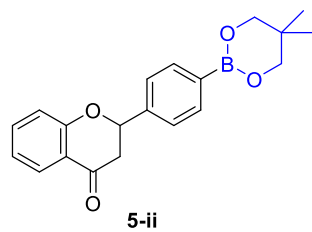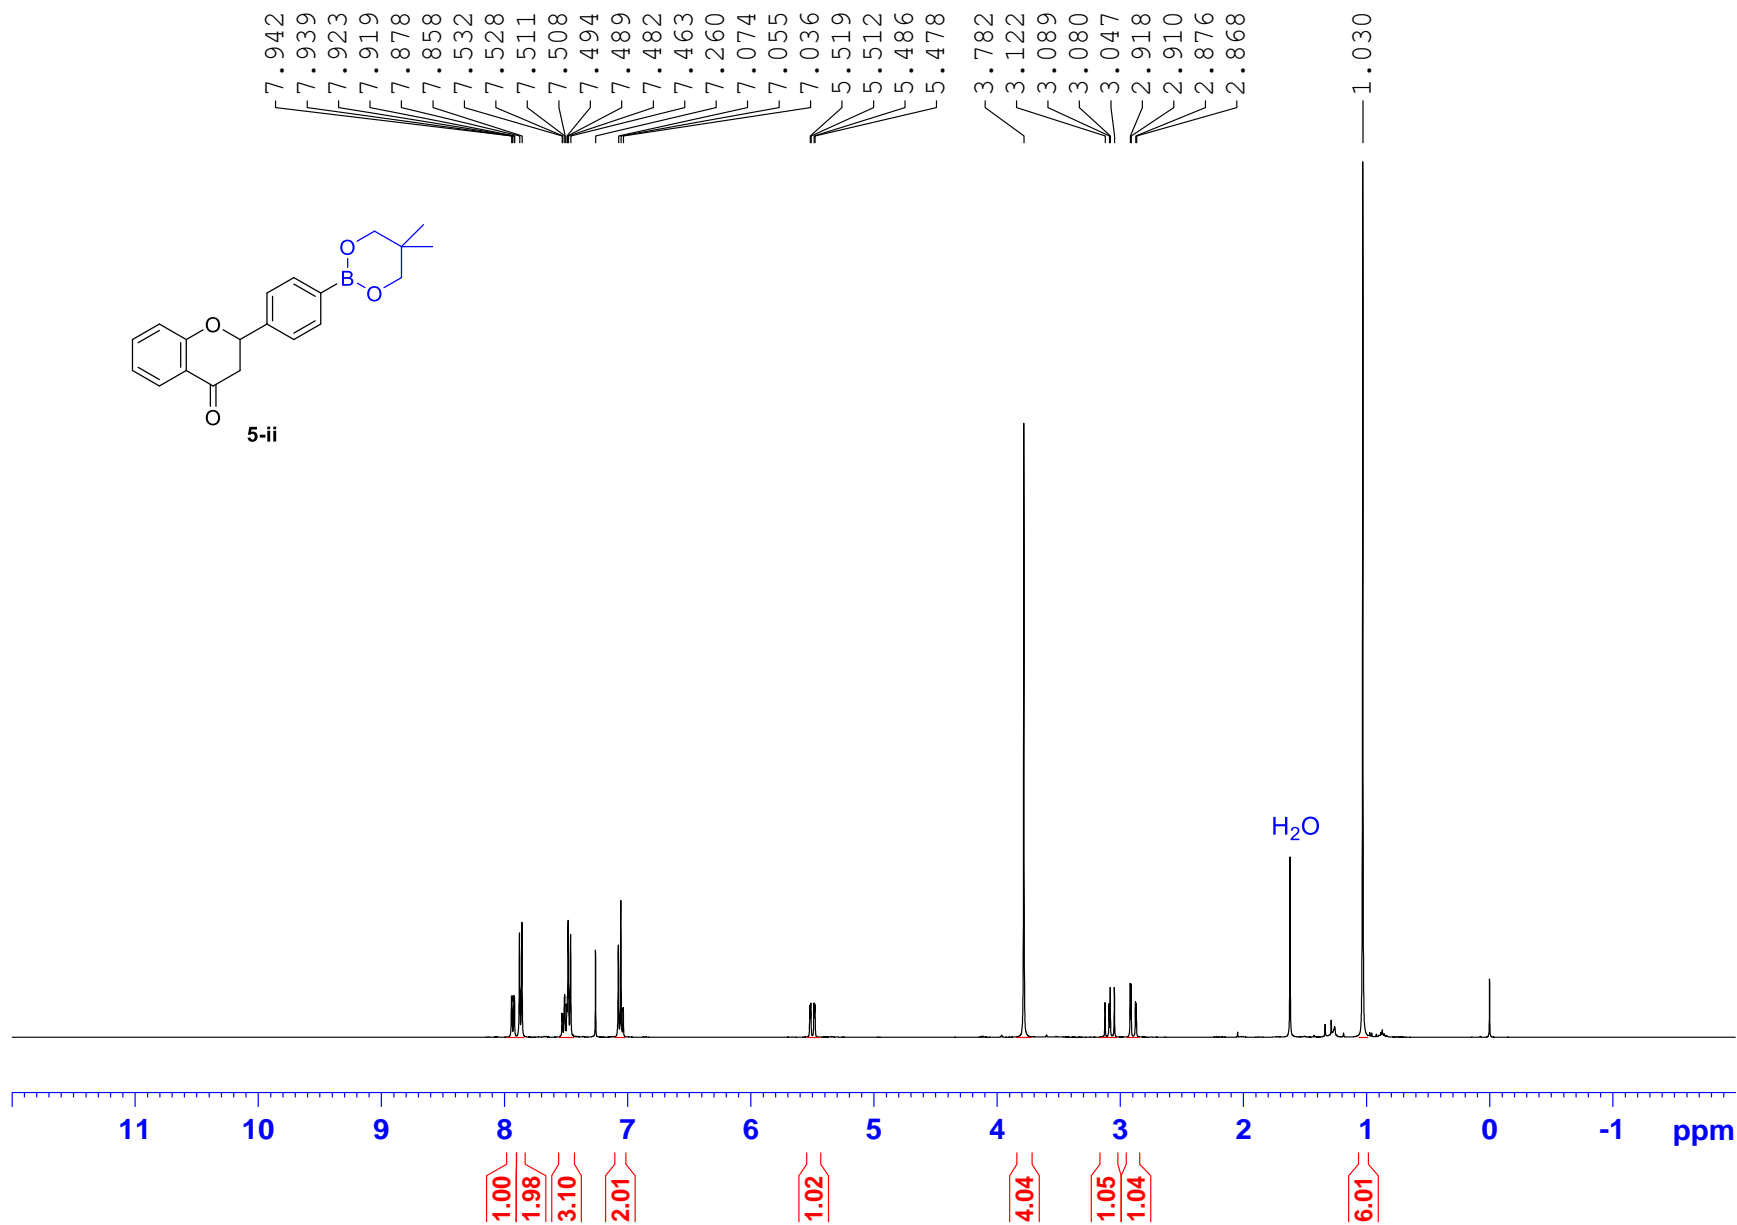



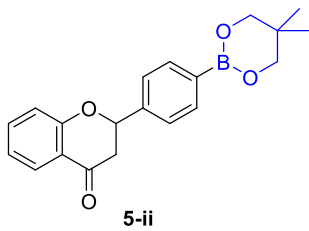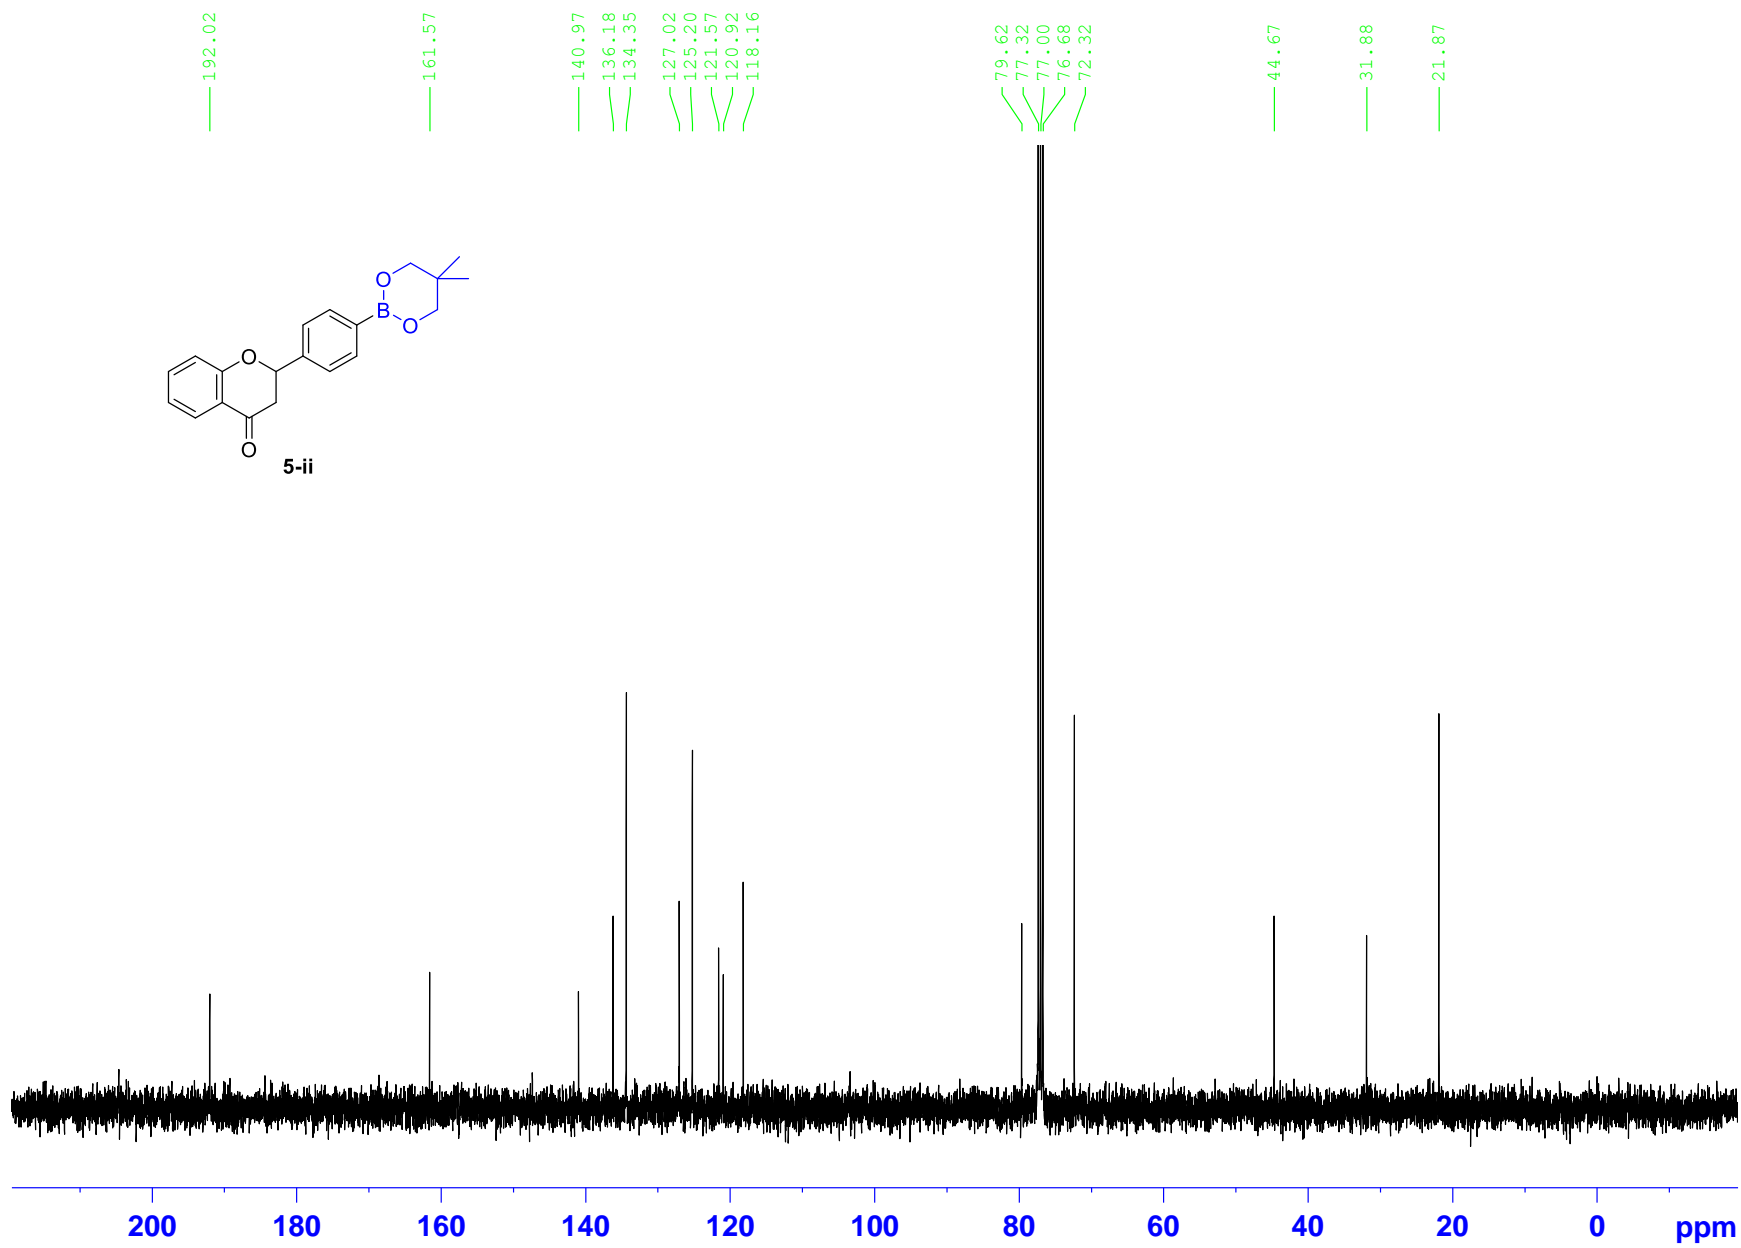

S209

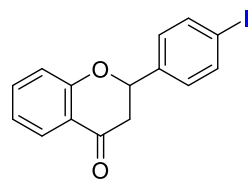

5-iii

7.939  
7.935  
7.920  
7.915  
7.783  
7.779  
7.762  
7.756  
7.543  
7.539  
7.525  
7.522  
7.504  
7.500  
7.263  
7.248  
7.227  
7.089  
7.087  
7.069  
7.061  
7.049  
7.041  
5.461  
5.454  
5.428  
5.421  
3.068  
3.036  
3.026  
2.994  
2.901  
2.894  
2.859  
2.852

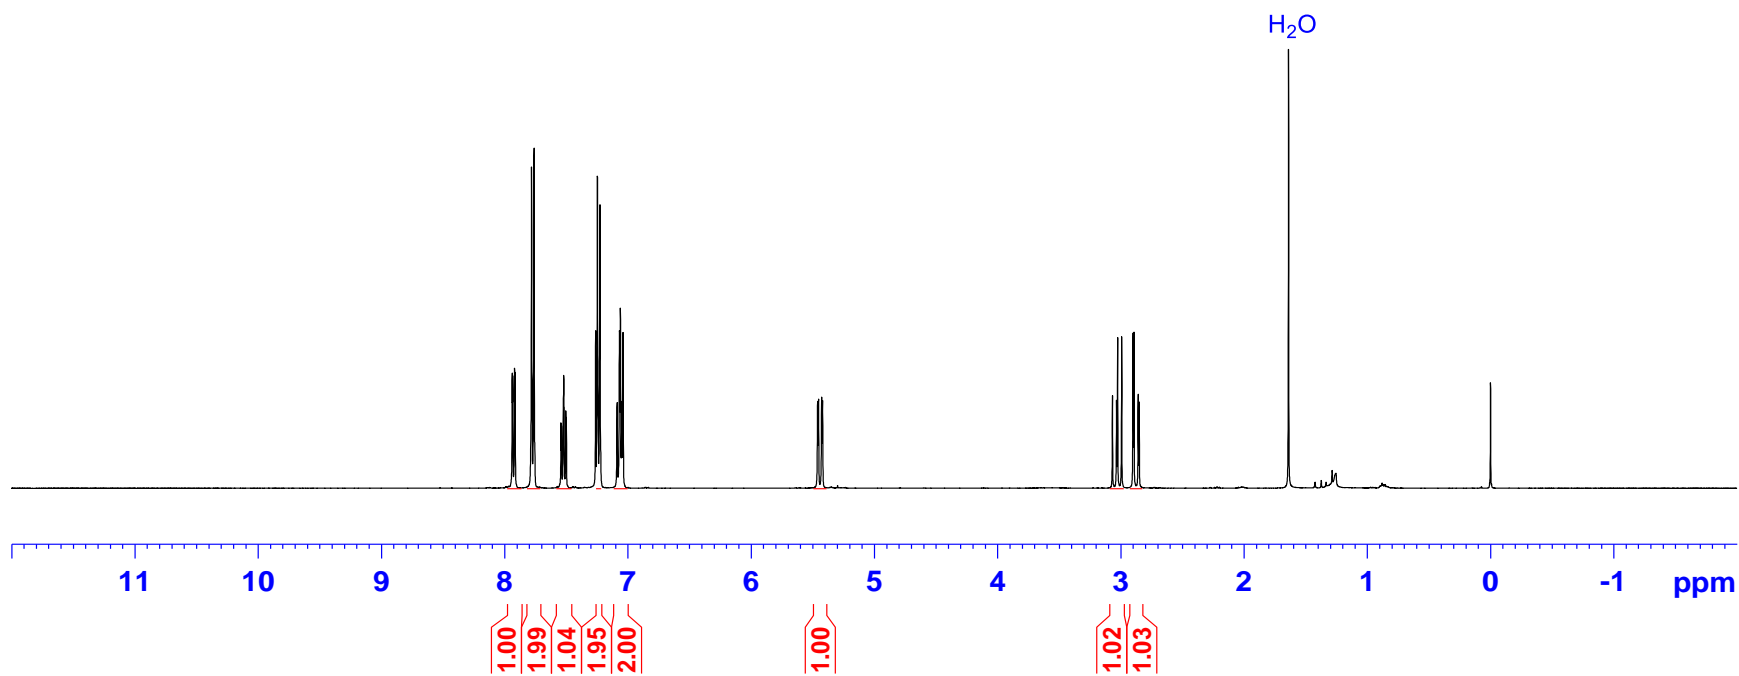

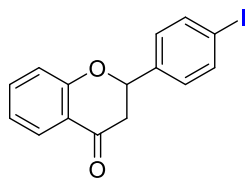

5-iii

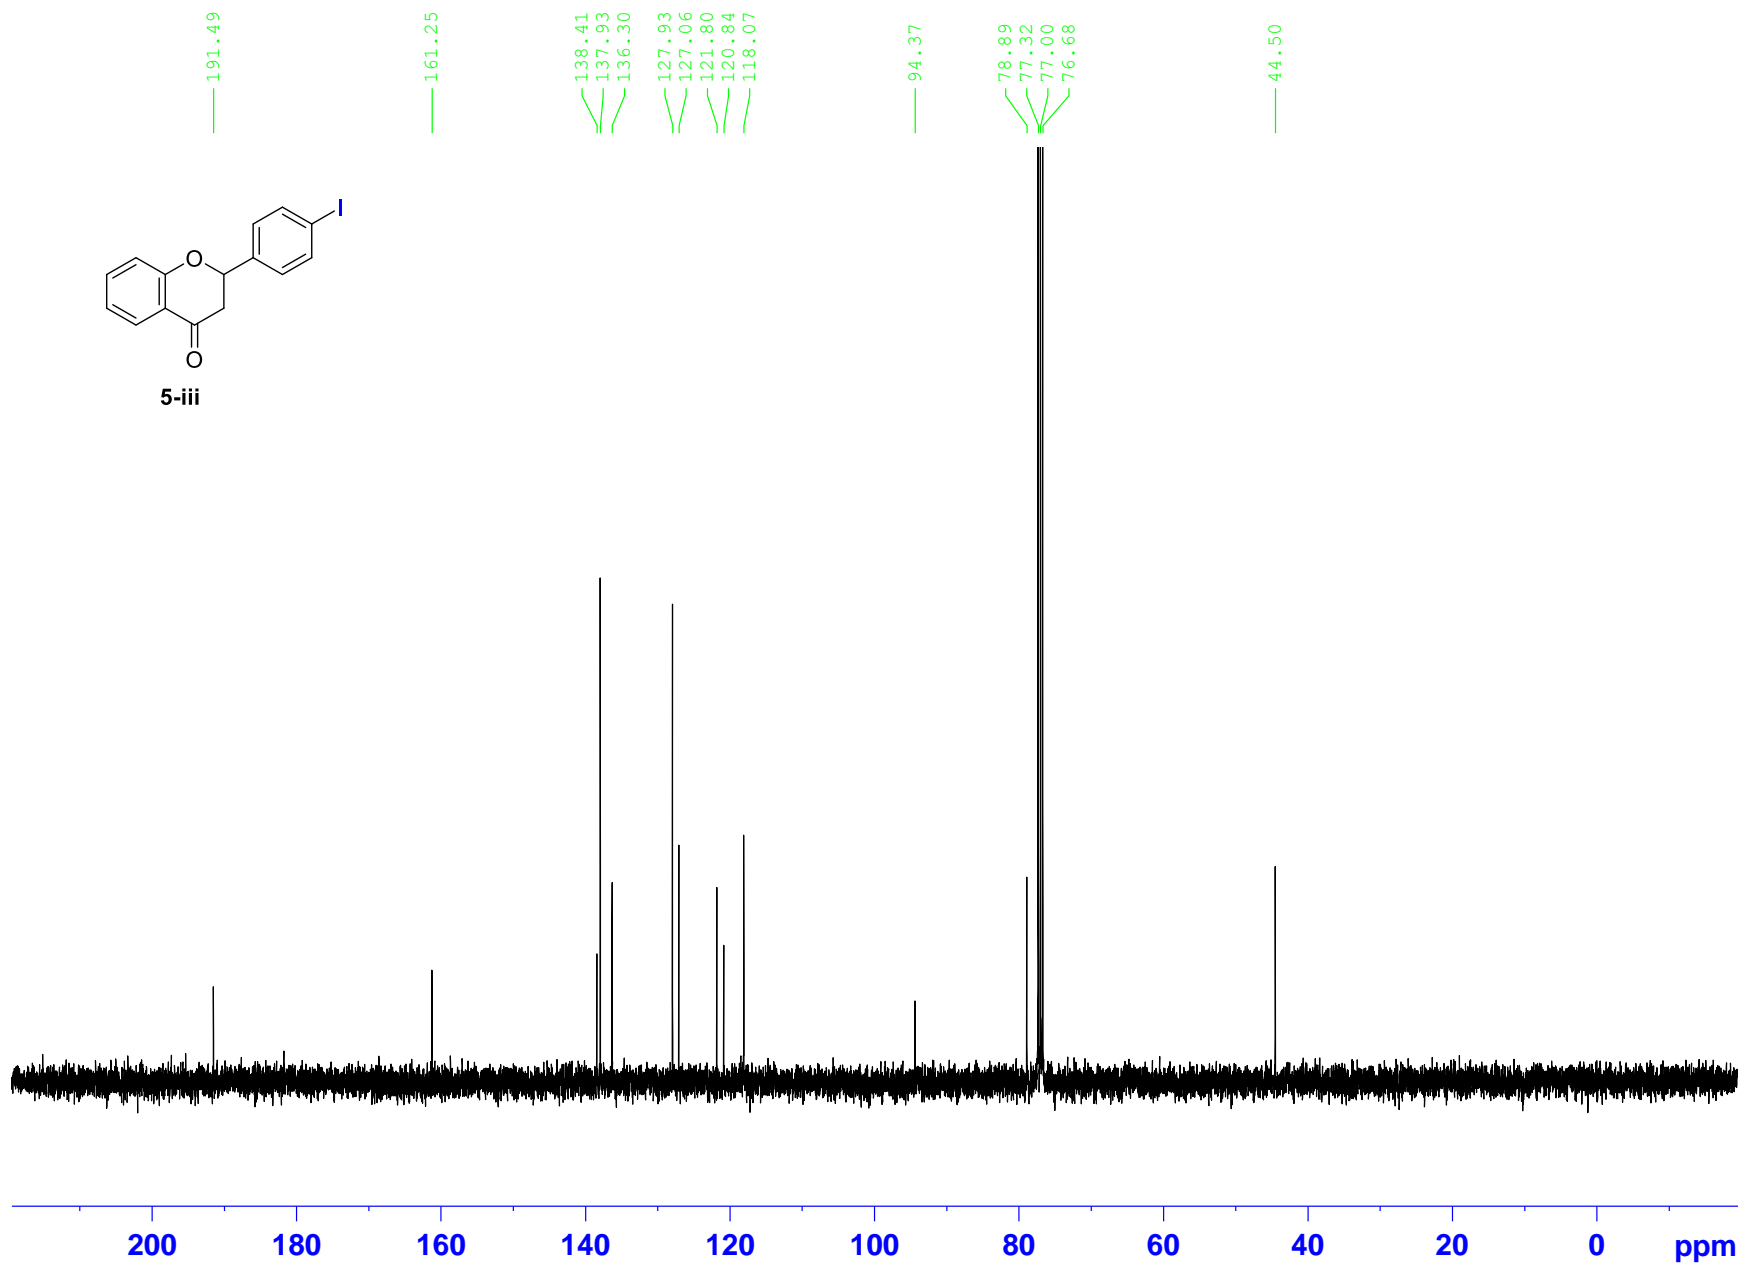

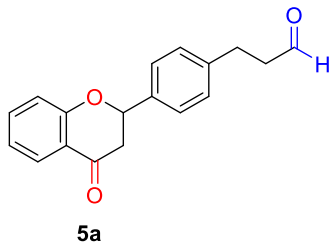

9.833  
7.942  
7.938  
7.922  
7.919  
7.531  
7.527  
7.510  
7.508  
7.493  
7.488  
7.430  
7.410  
7.284  
7.264  
7.074  
7.055  
7.036  
5.480  
5.473  
5.447  
5.440  
3.124  
3.091  
3.082  
3.048  
3.012  
2.993  
2.975  
2.899  
2.892  
2.857  
2.850  
2.830  
2.811  
2.792

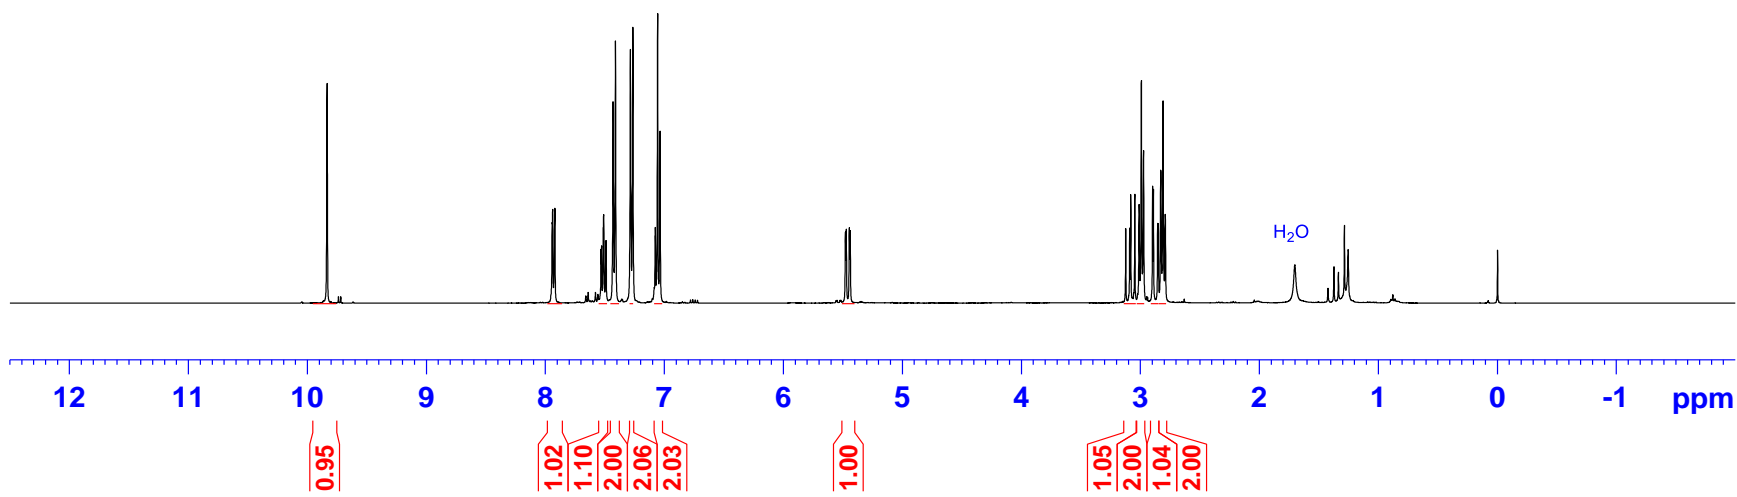

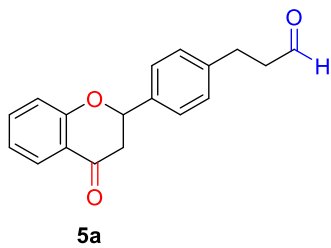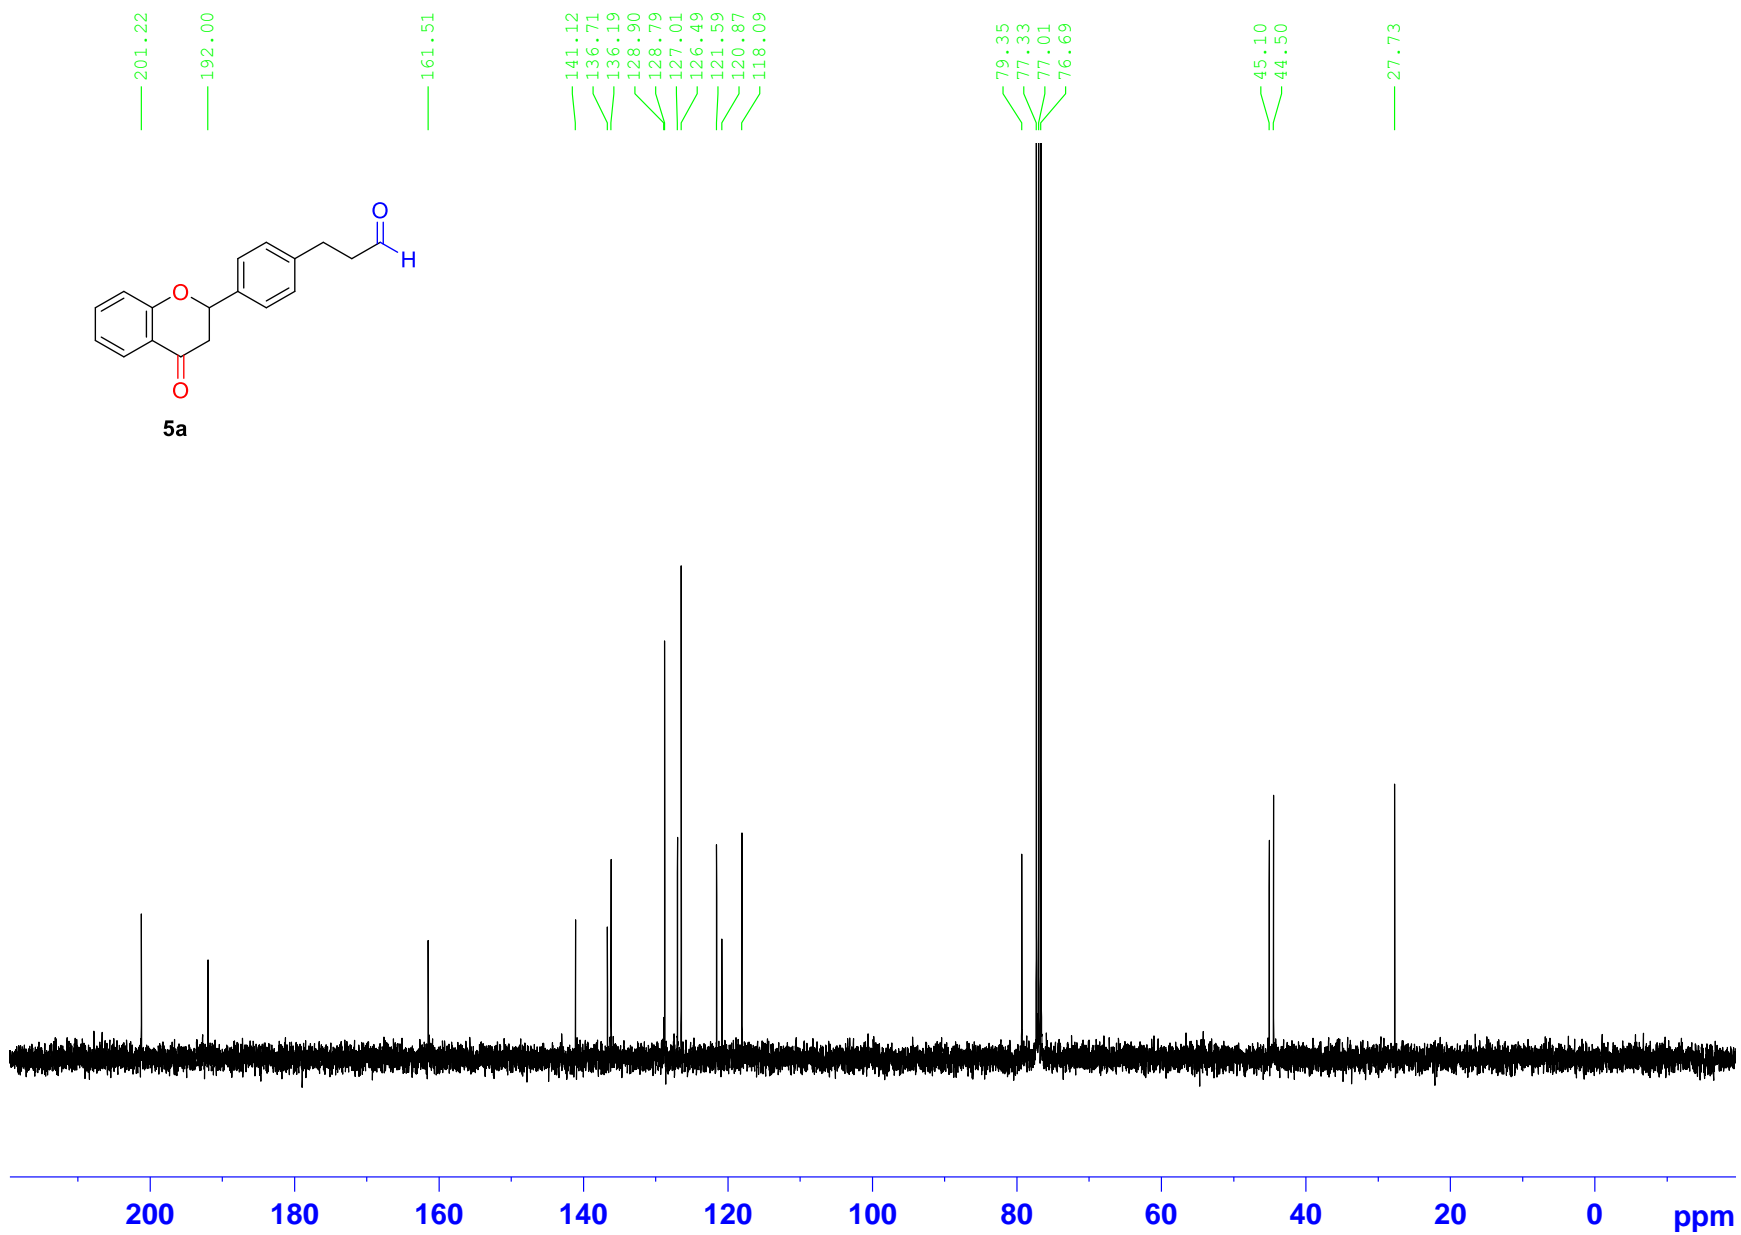

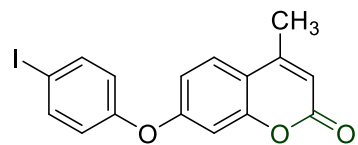

7-i

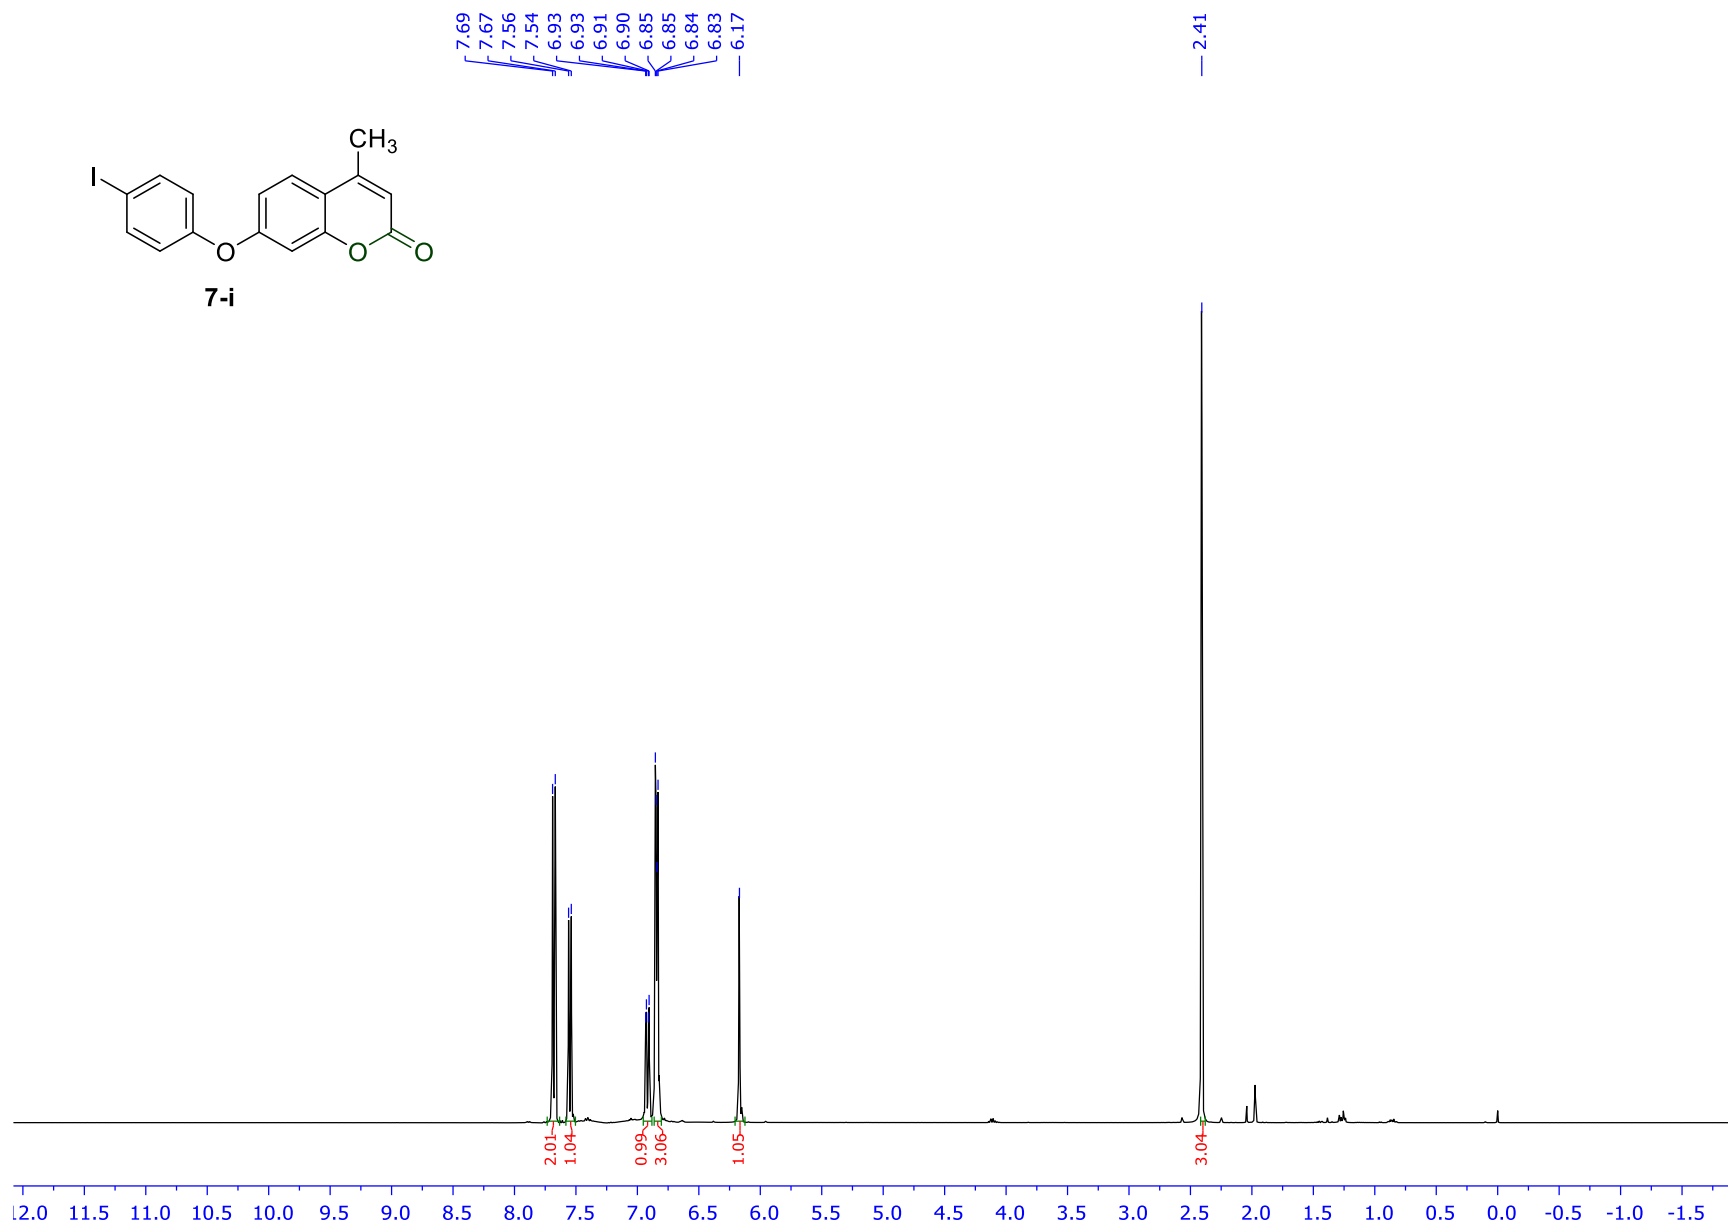

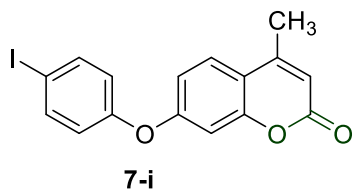

160.42  
159.96  
155.17  
154.71  
151.99

138.91

125.87

121.93

115.38

114.17

112.98

105.55

87.93

77.32

77.00

76.68

18.56

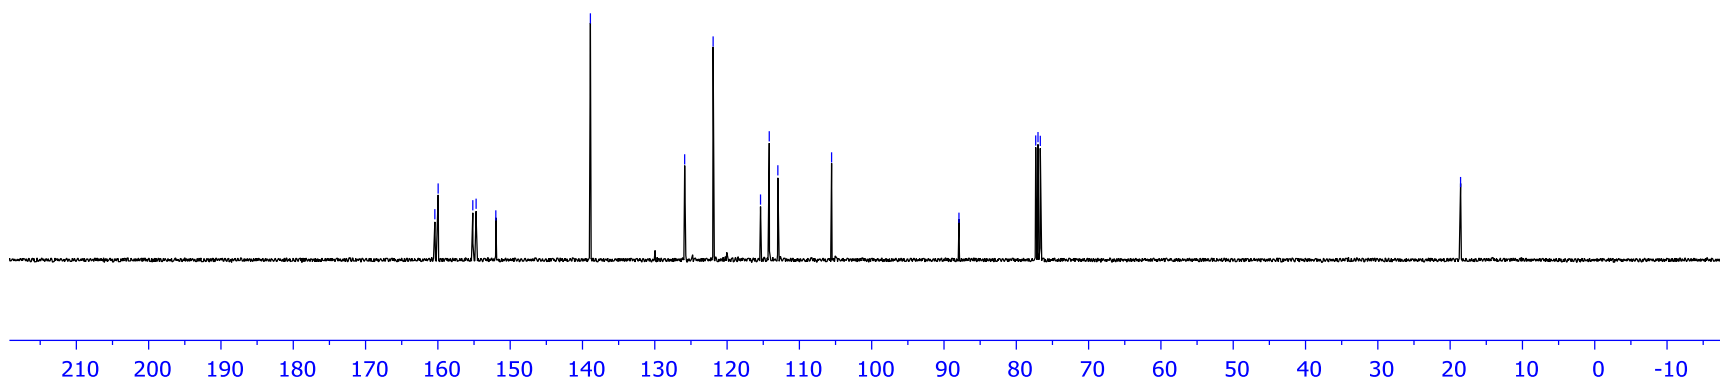

S215

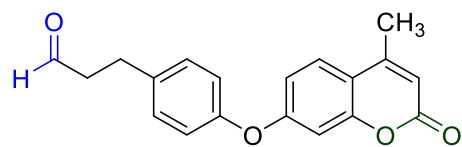

7a

9.85  
7.54  
7.52  
7.27  
7.25  
7.23  
7.02  
7.02  
7.00  
6.95  
6.94  
6.92  
6.92  
6.82  
6.81  
6.18

3.00  
2.98  
2.97  
2.84  
2.82  
2.81  
2.41  
2.41

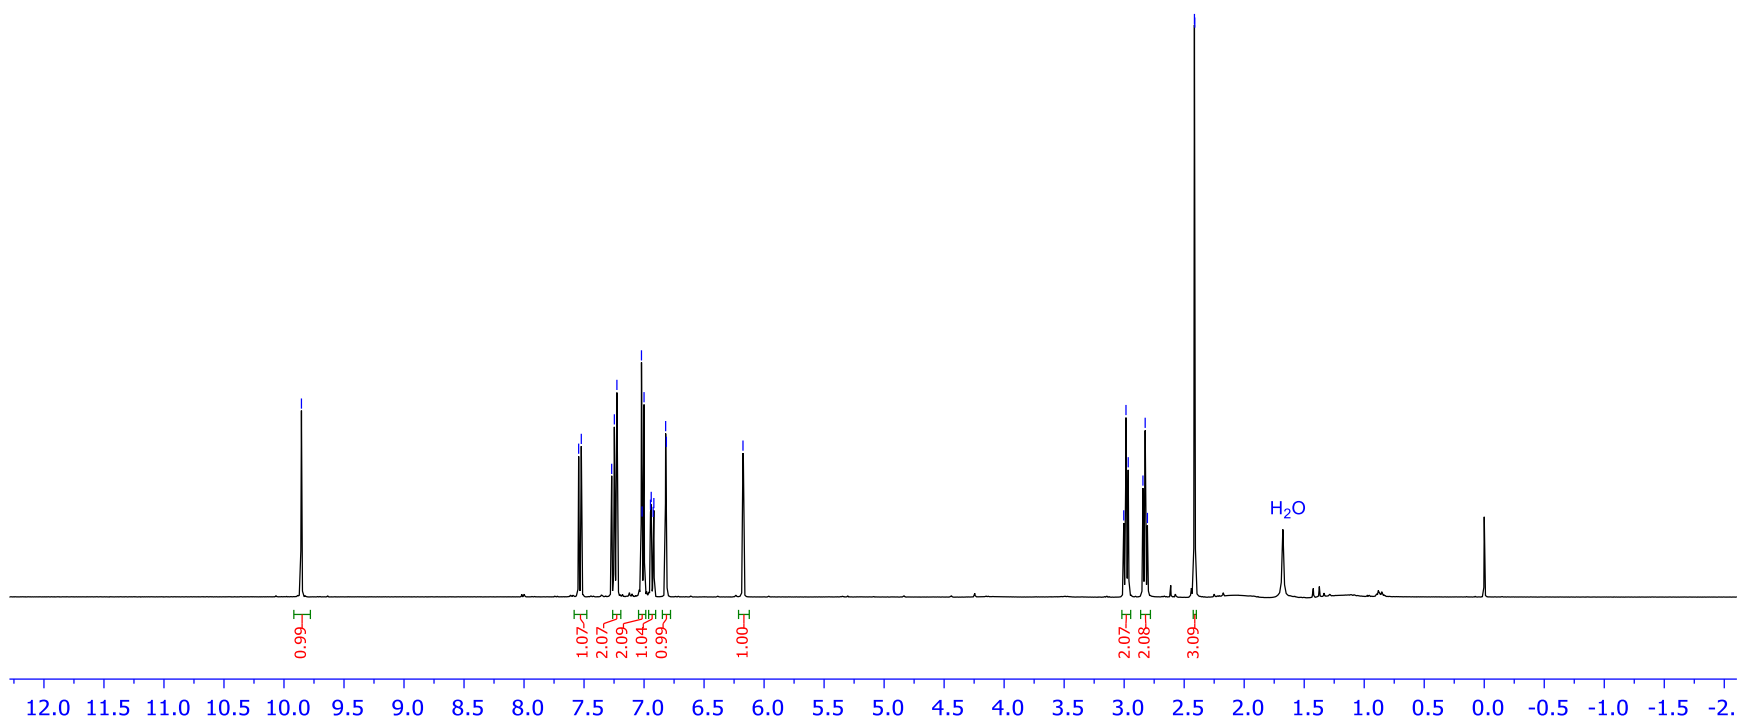



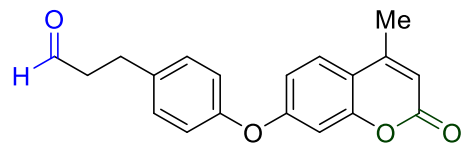

7a

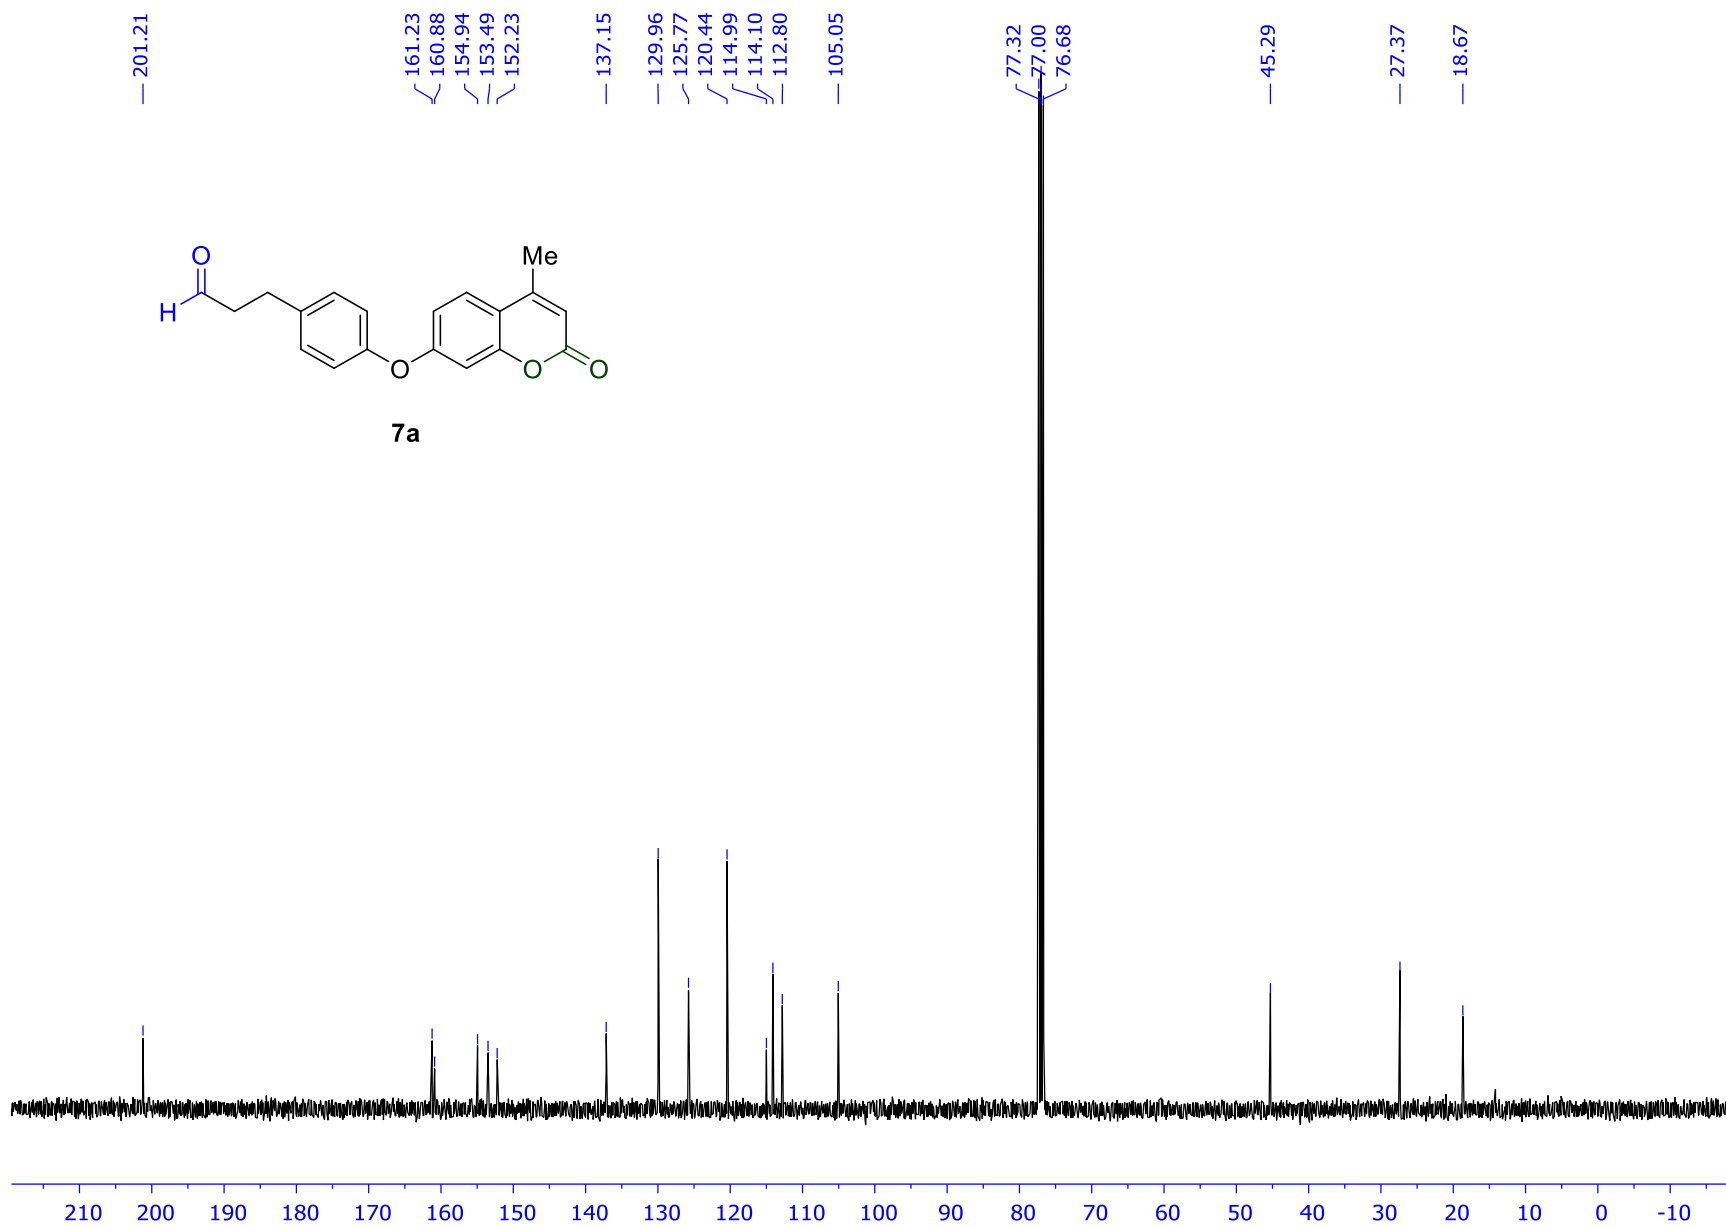

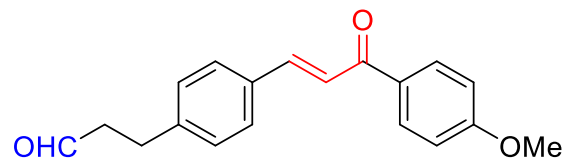

8a

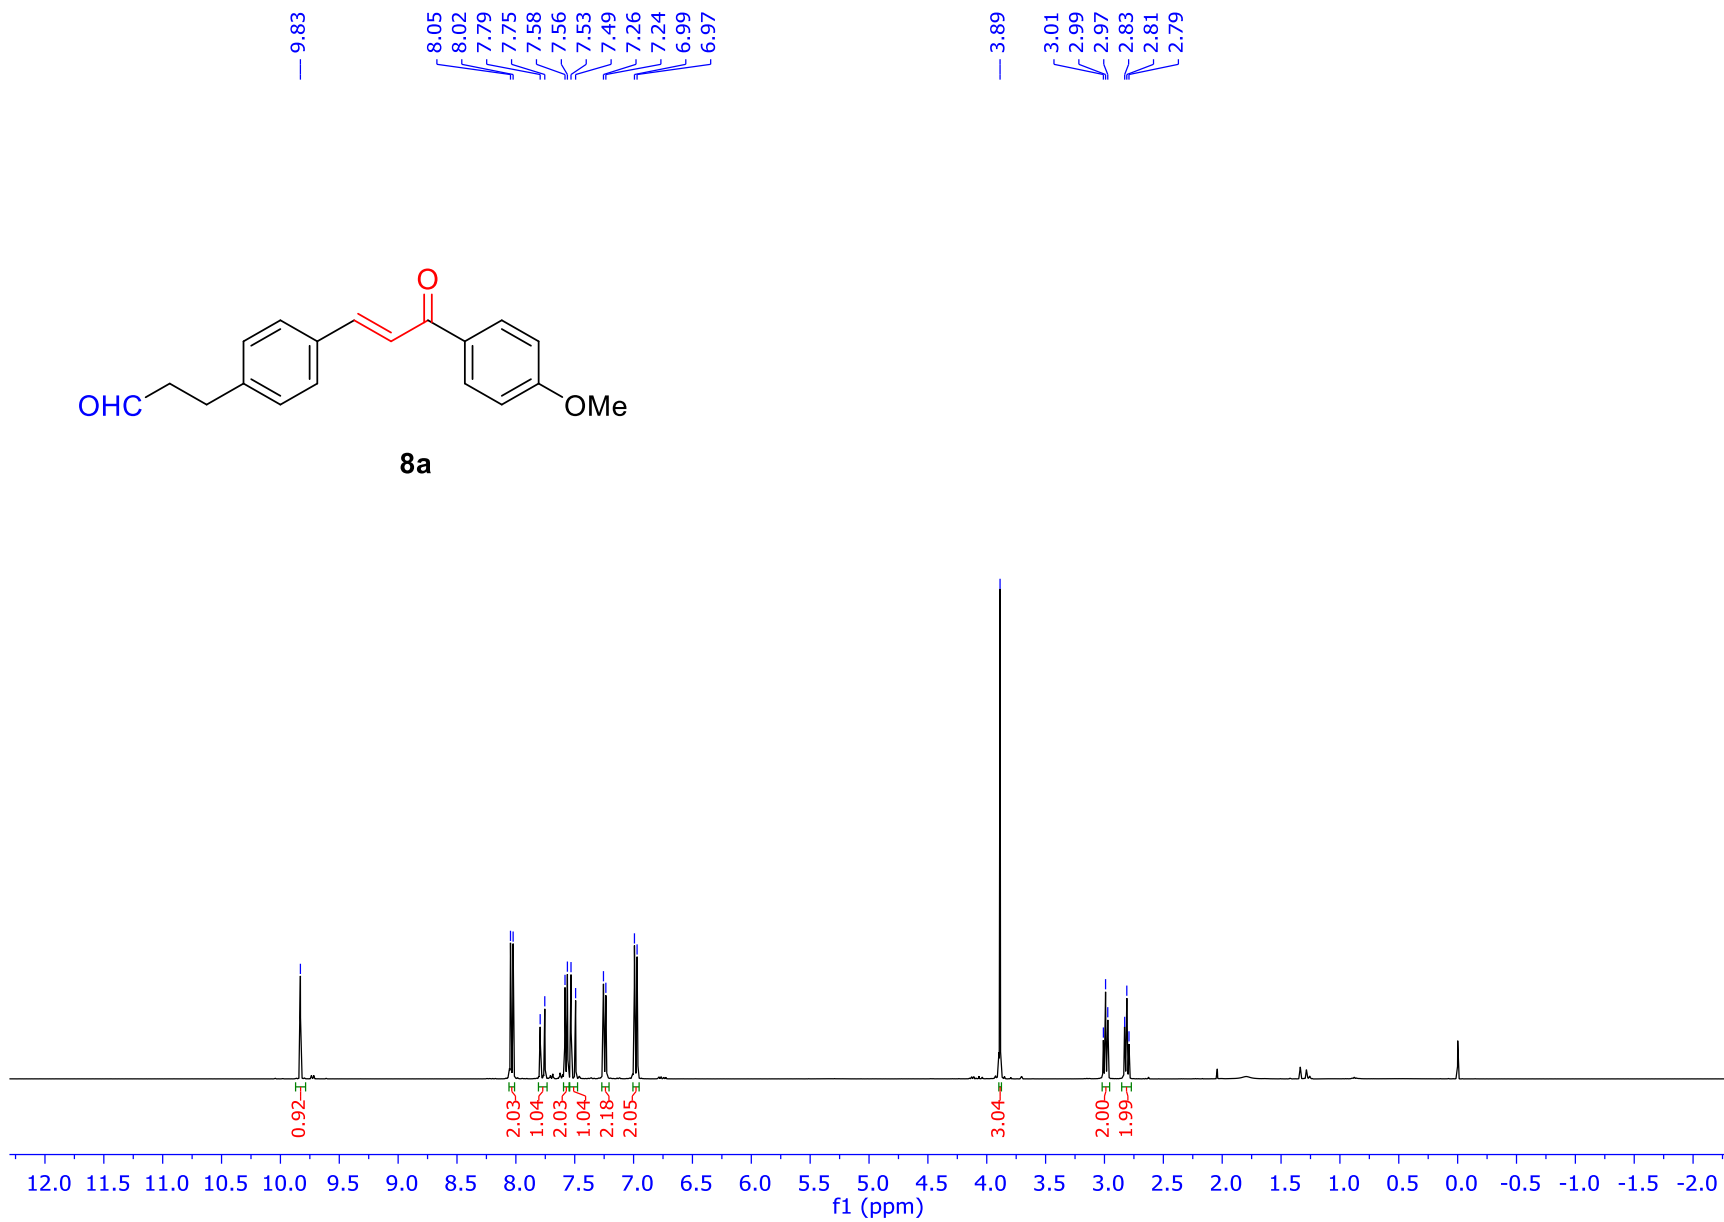

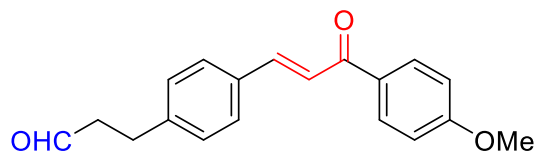

8a

— 201.03

— 188.69

— 163.39

— 143.60

— 143.02

— 133.24

— 131.10

— 130.76

— 128.90

— 128.62

— 121.40

— 113.81

— 77.32

— 77.00

— 76.68

— 55.46

— 44.90

— 27.92

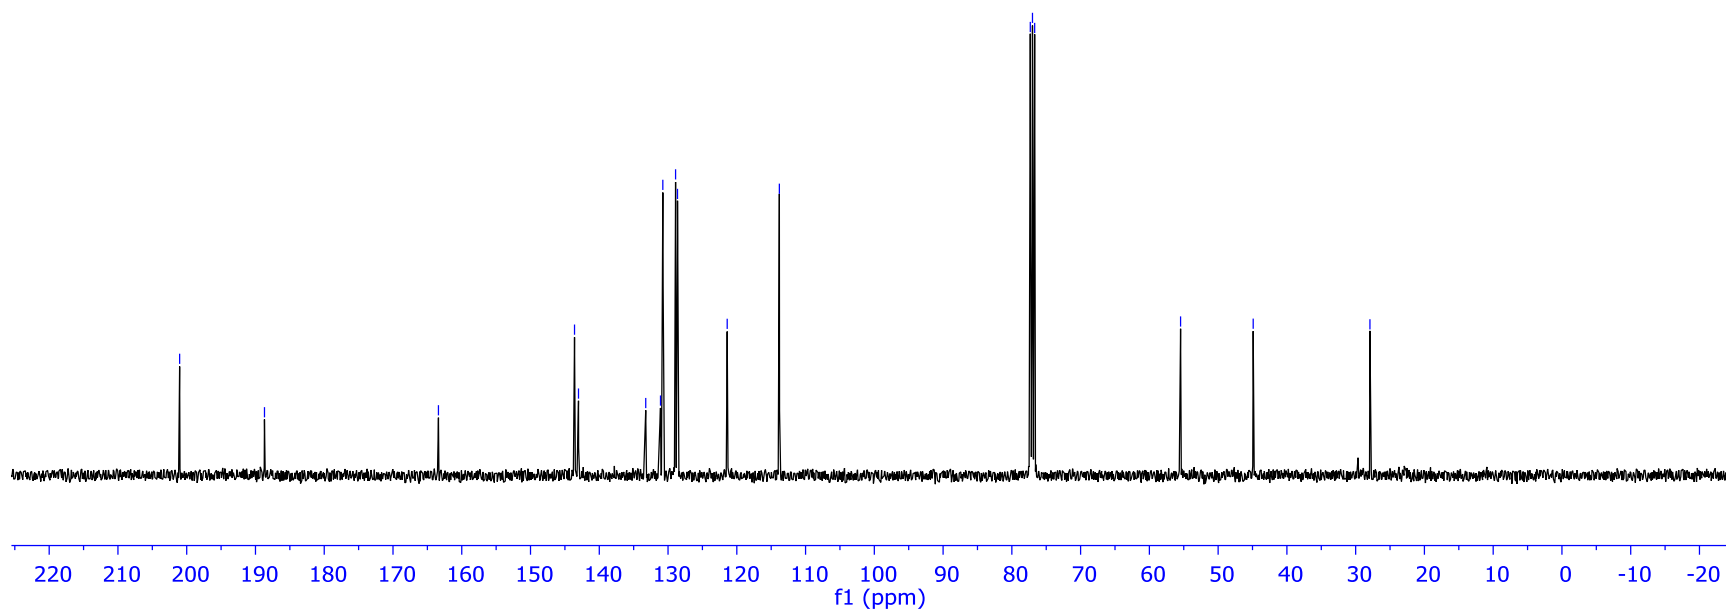

7.791  
7.769  
7.741  
7.720  
7.262  
4.921  
1.986  
1.955  
1.947  
1.801  
1.791  
1.783  
1.767  
1.758  
1.697  
1.684  
1.642  
1.615  
1.571  
1.549  
1.533  
1.516  
1.506  
1.500  
1.482  
1.476  
1.373  
1.344  
1.336  
1.325  
1.312  
1.286  
1.273  
1.254  
1.220  
1.153  
1.131  
1.115  
1.091  
1.082  
1.070  
1.043  
1.028  
1.013  
0.995  
0.984  
0.971  
0.911  
0.894  
0.874  
0.870  
0.860  
0.854  
0.653

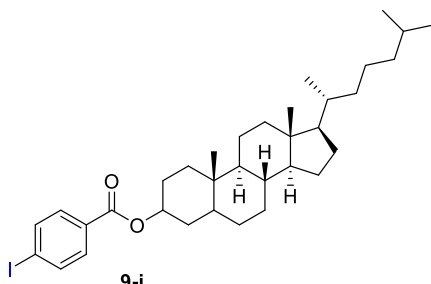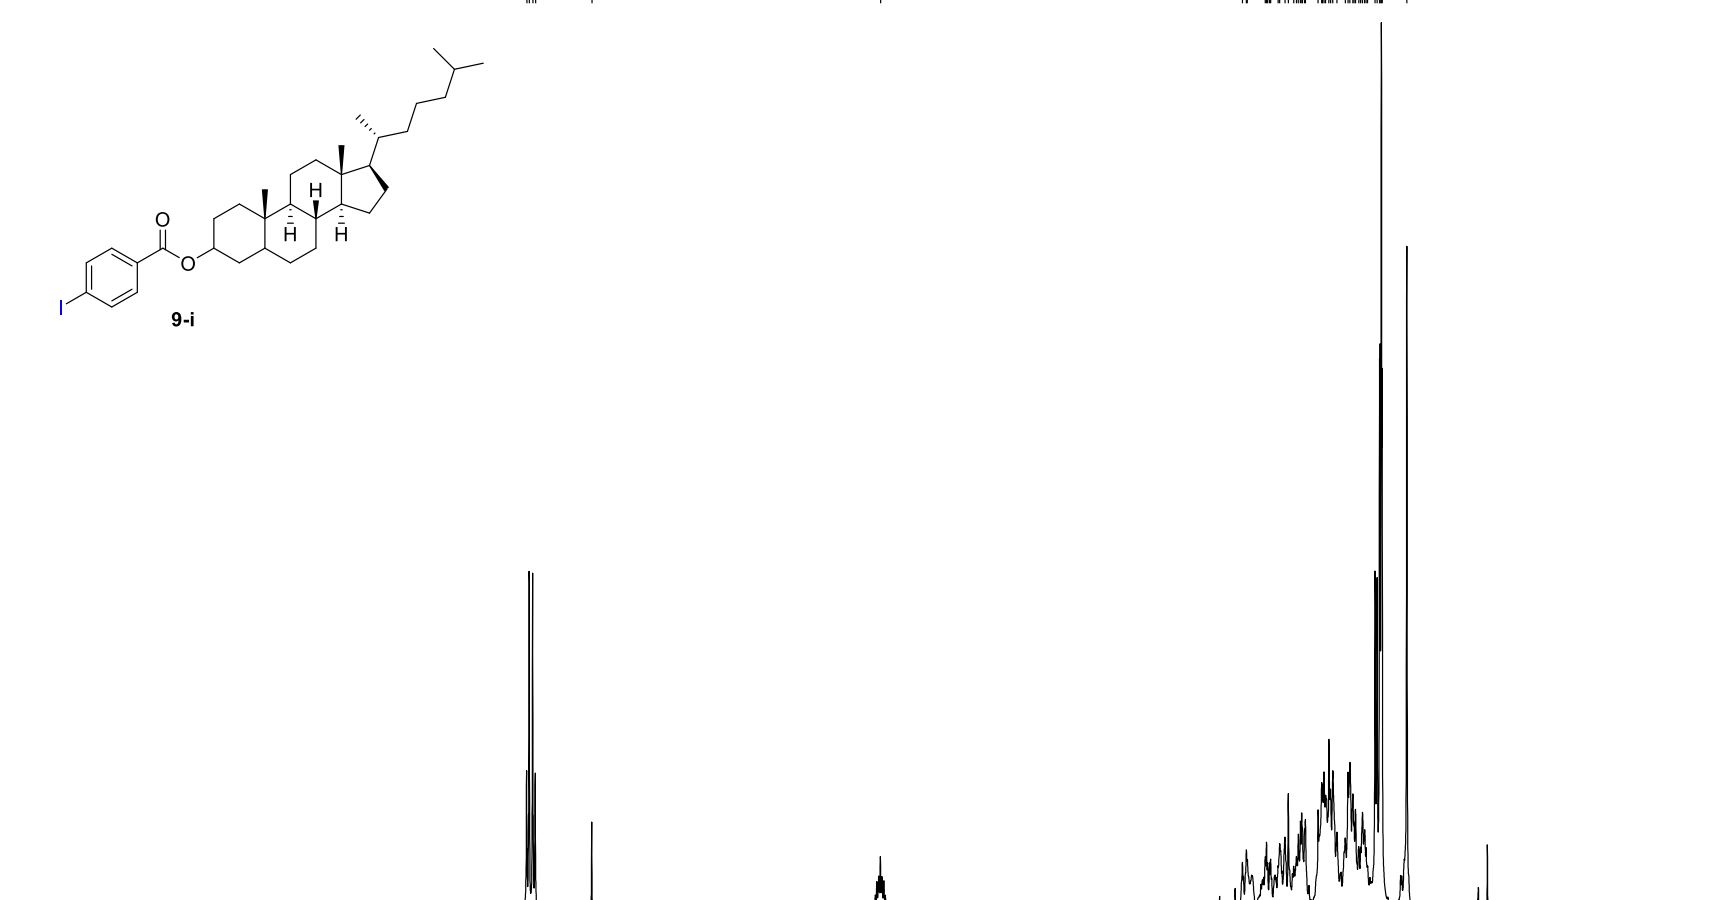

11 10 9 8 7 6 5 4 3 2 1 0 -1 ppm

2.04  
1.99  
1.00  
2.11  
2.05  
2.83  
4.08  
10.01  
5.97  
3.10  
13.06  
3.02

S220

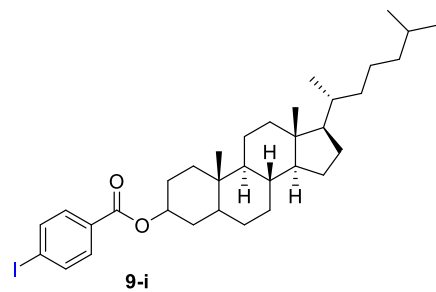

165.57

137.54

130.99

130.38

100.35

77.31

77.00

76.68

74.71

56.38

56.23

54.18

44.65

42.56

39.94

39.49

36.73

36.14

35.78

35.47

35.45

34.04

31.96

28.60

28.22

27.99

27.51

24.18

23.82

22.81

22.55

21.19

18.65

12.27

12.05

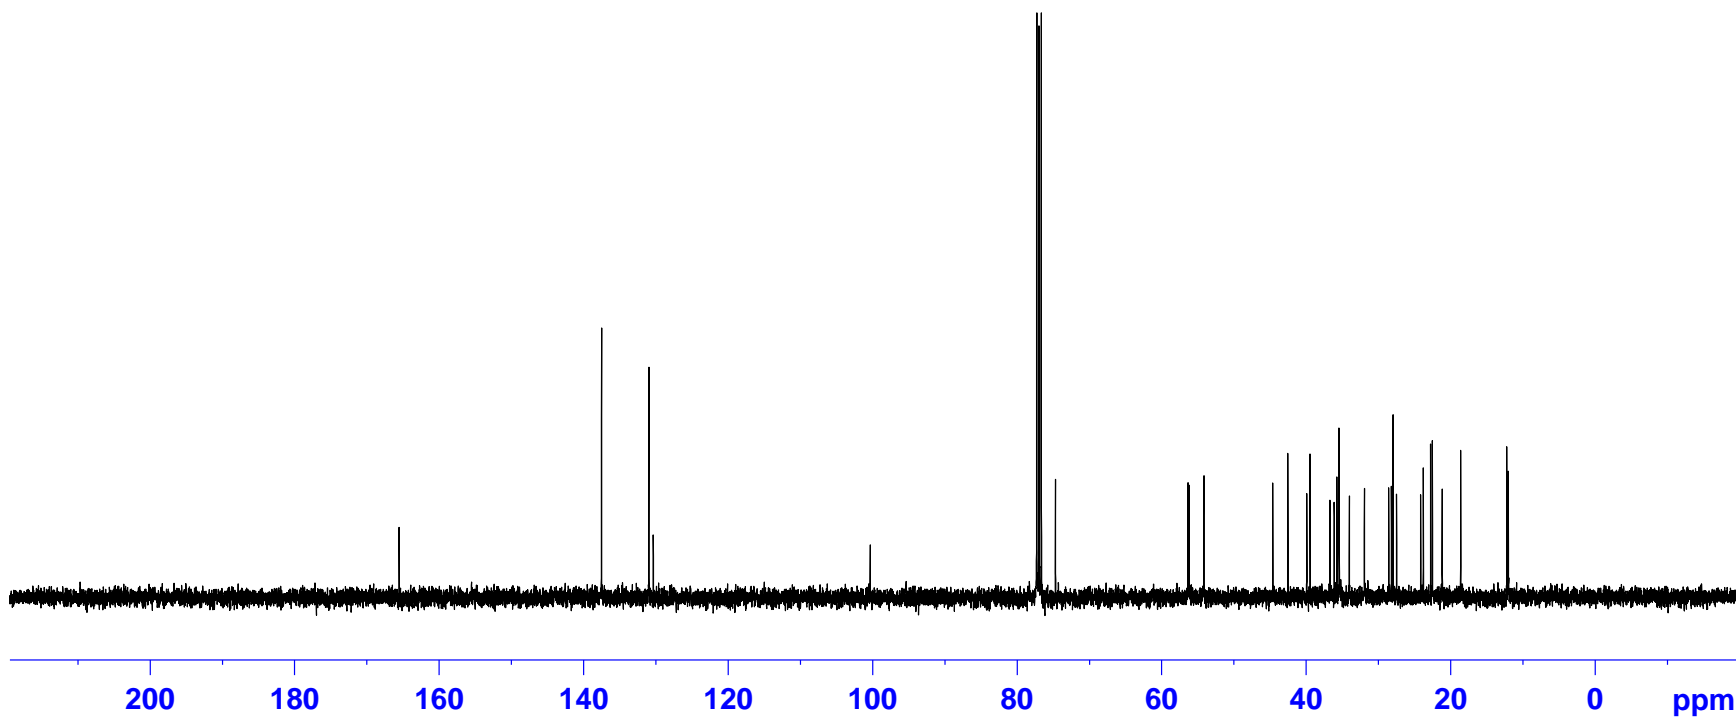

S221

9.819  
 7.968  
 7.948  
 7.264  
 7.261  
 7.240  
 4.925  
 3.021  
 3.002  
 2.983  
 2.824  
 2.805  
 2.787  
 1.957  
 1.792  
 1.686  
 1.645  
 1.636  
 1.550  
 1.533  
 1.516  
 1.509  
 1.500  
 1.480  
 1.373  
 1.345  
 1.334  
 1.325  
 1.316  
 1.307  
 1.286  
 1.275  
 1.255  
 1.156  
 1.132  
 1.124  
 1.117  
 1.111  
 1.095  
 1.073  
 1.045  
 1.030  
 1.017  
 1.005  
 0.997  
 0.990  
 0.912  
 0.896  
 0.875  
 0.870  
 0.865  
 0.858  
 0.854  
 0.656

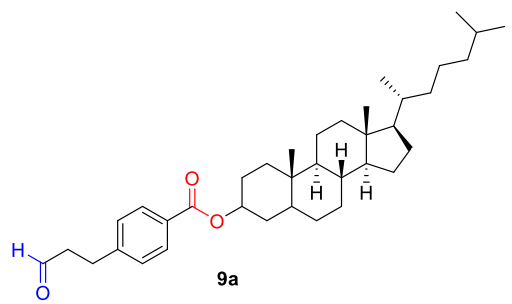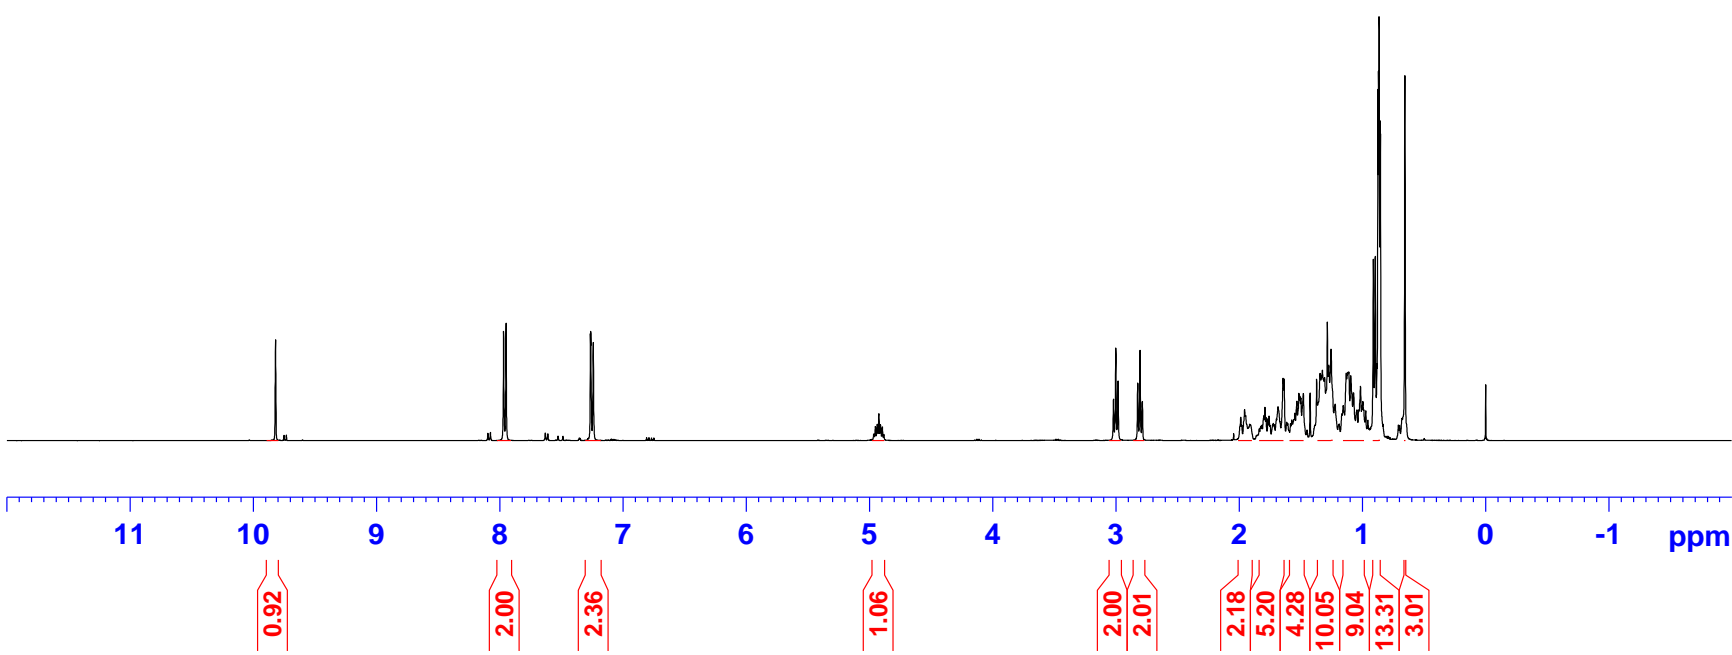

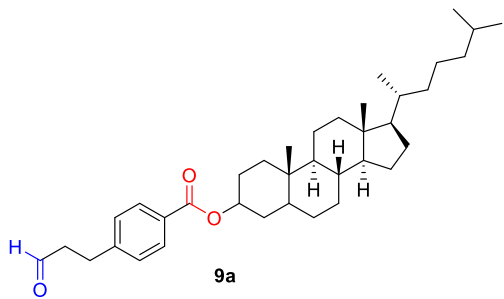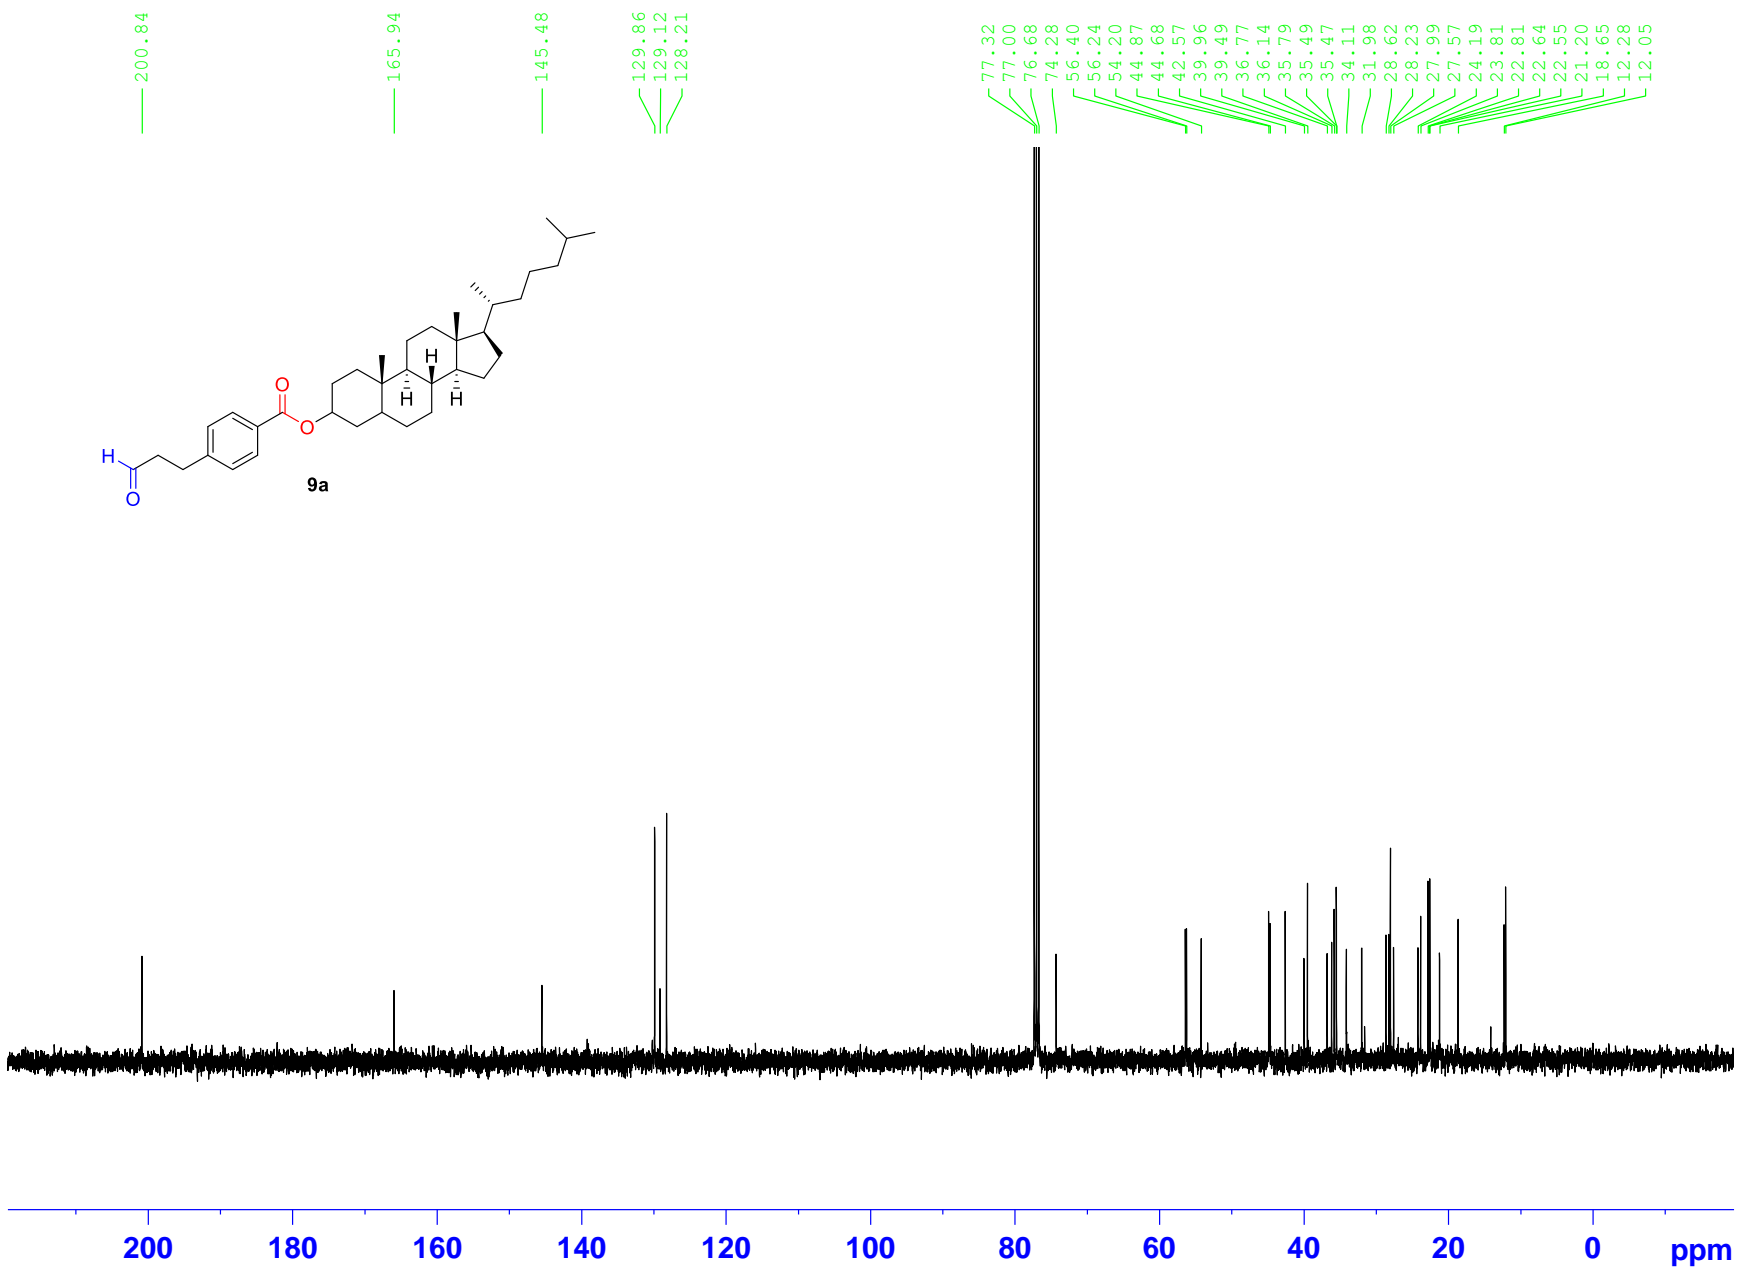

S223

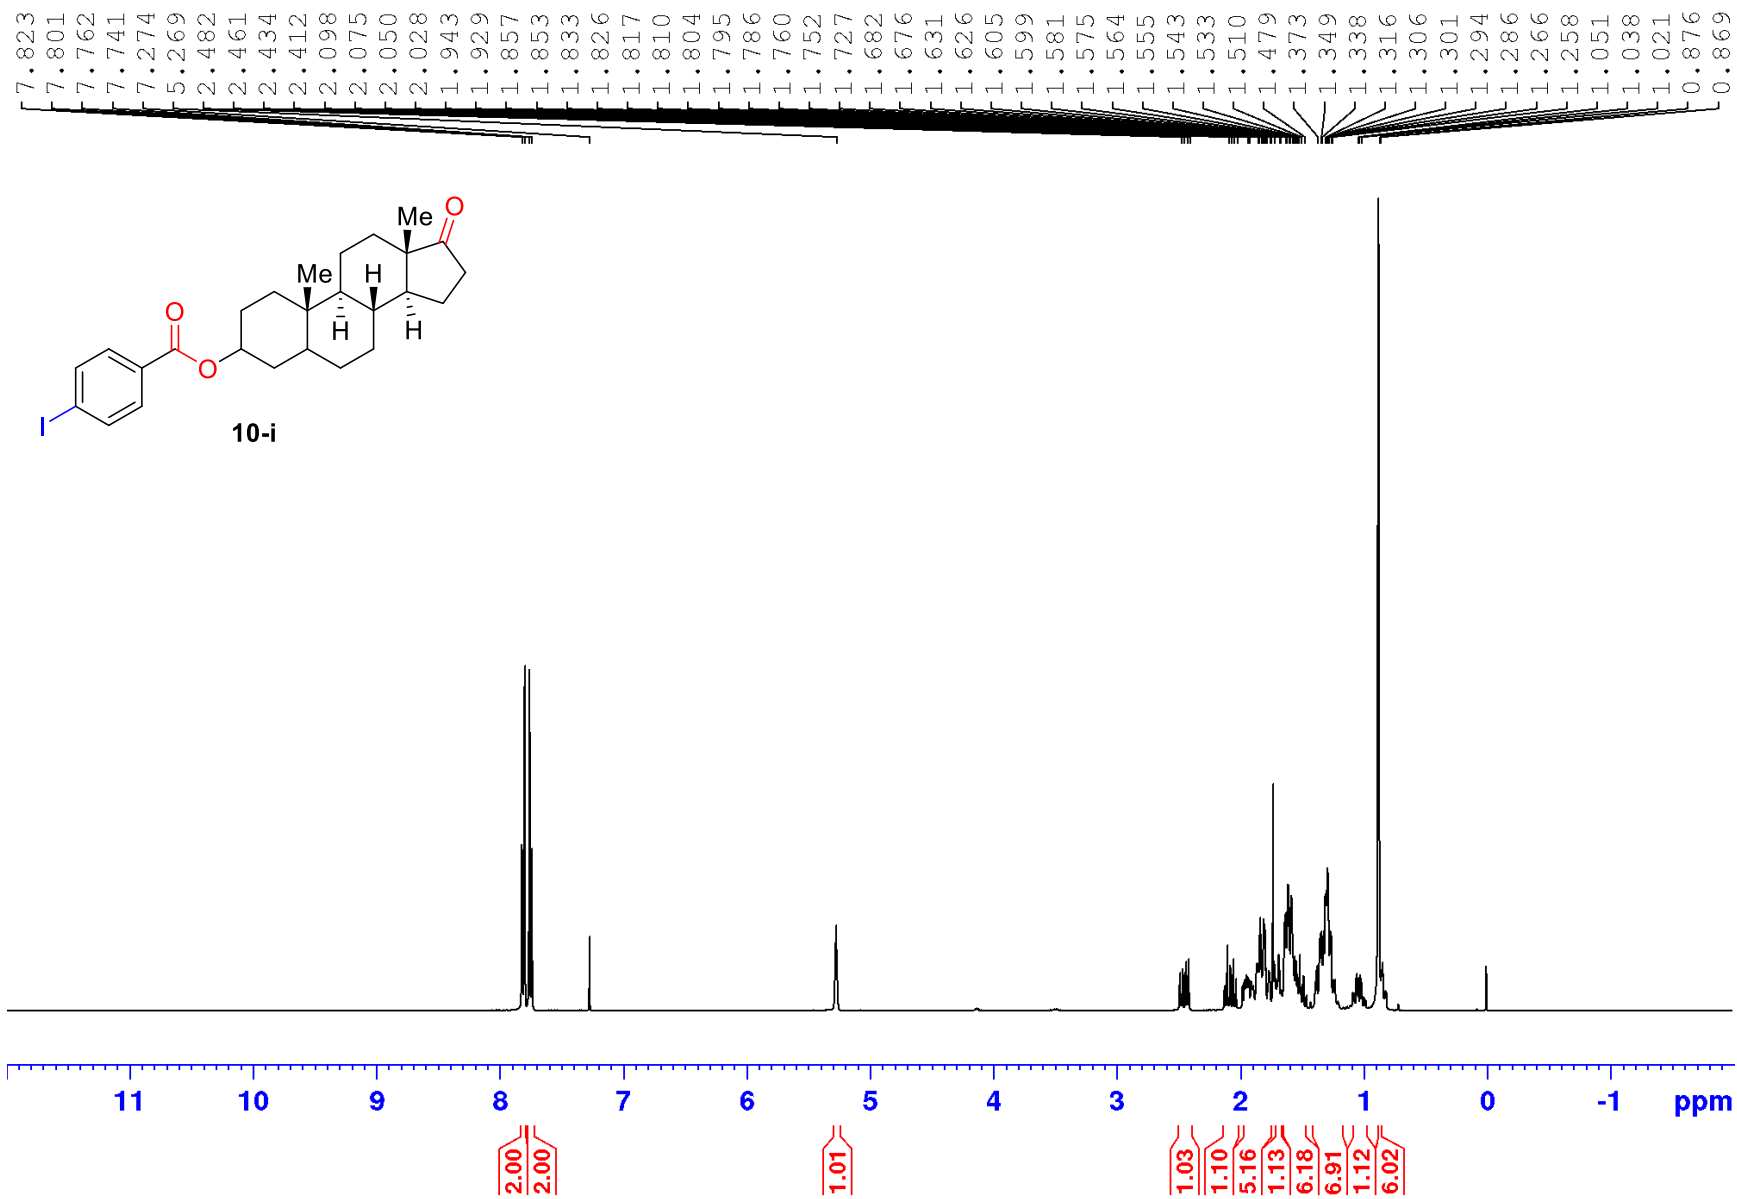



— 221.23

— 165.33

— 137.65

— 130.95

— 130.50

— 100.38

— 77.32

— 77.00

— 76.68

— 70.91

— 54.42

— 51.42

— 47.75

— 40.45

— 36.01

— 35.79

— 34.97

— 33.12

— 32.83

— 31.49

— 30.71

— 27.99

— 26.16

— 21.69

— 20.06

— 13.79

— 11.36

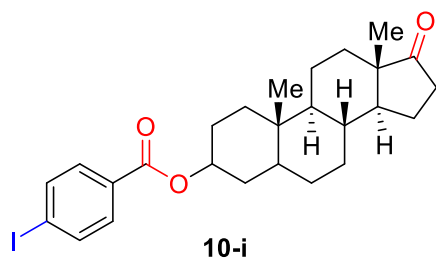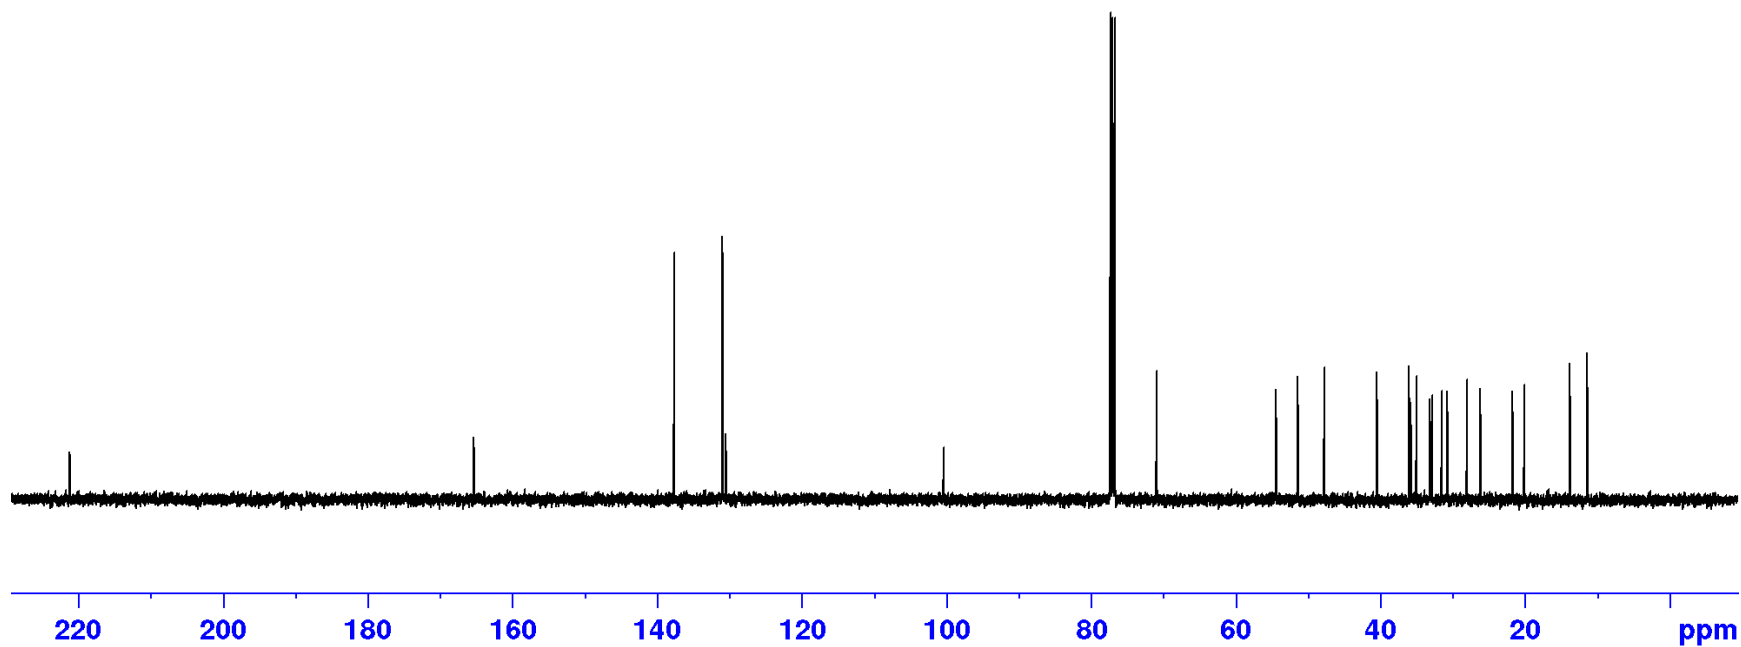

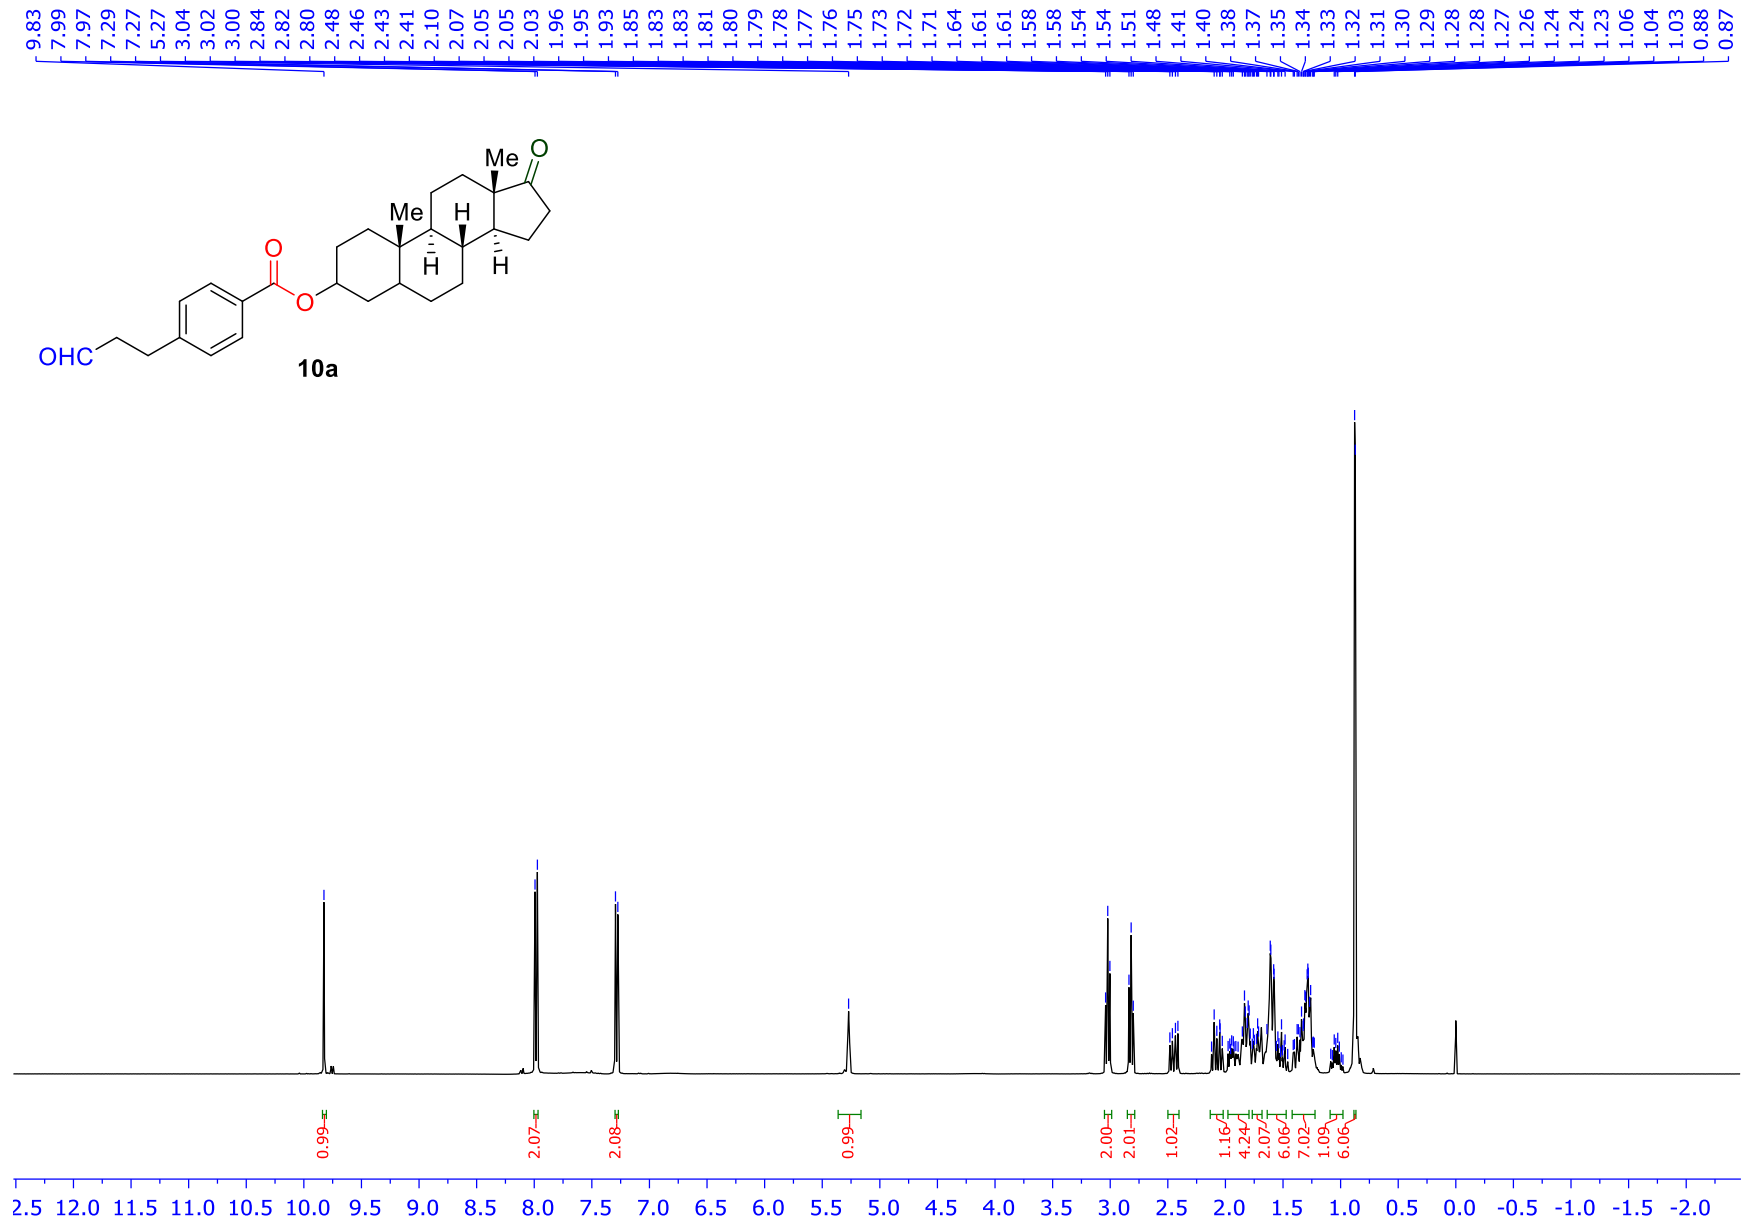

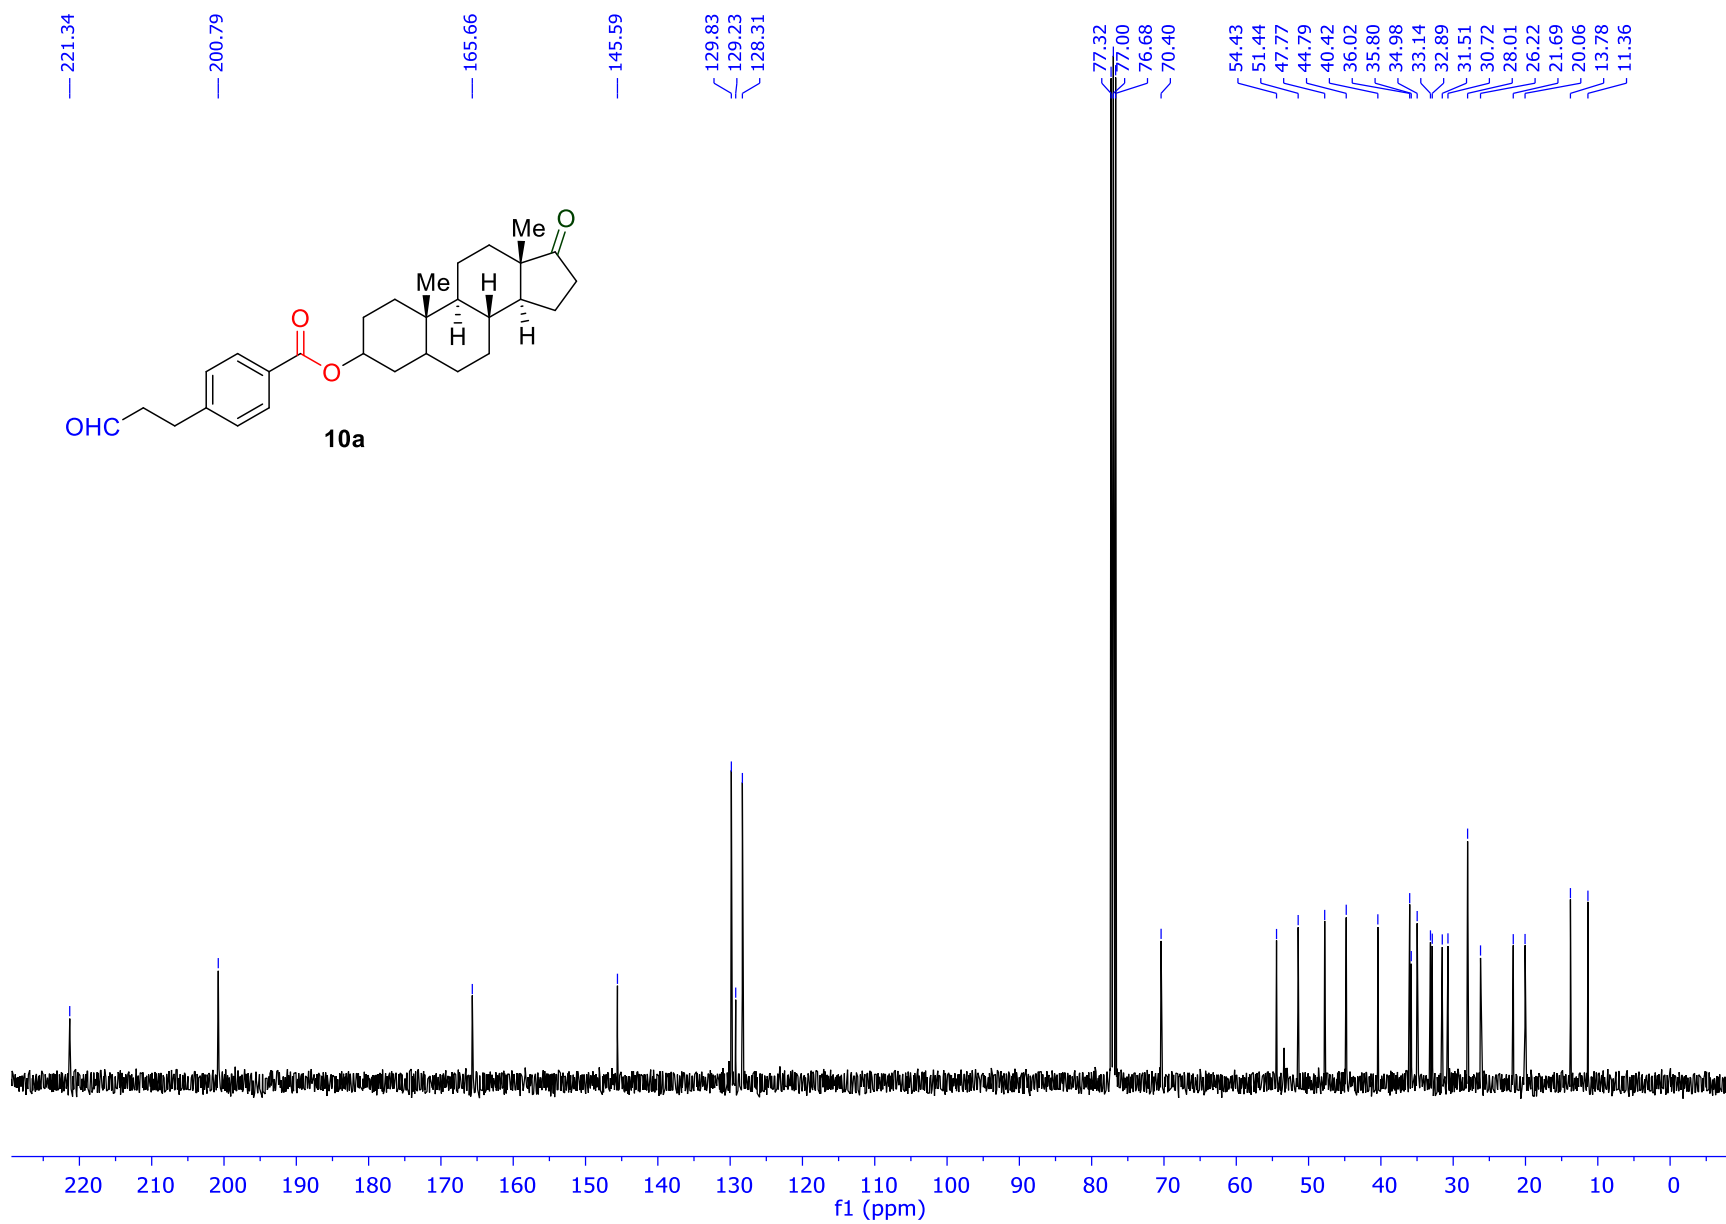

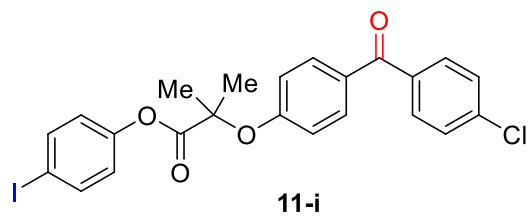

7.795  
7.773  
7.723  
7.702  
7.676  
7.654  
7.462  
7.441  
7.262  
6.984  
6.962  
6.766  
6.744

1.815

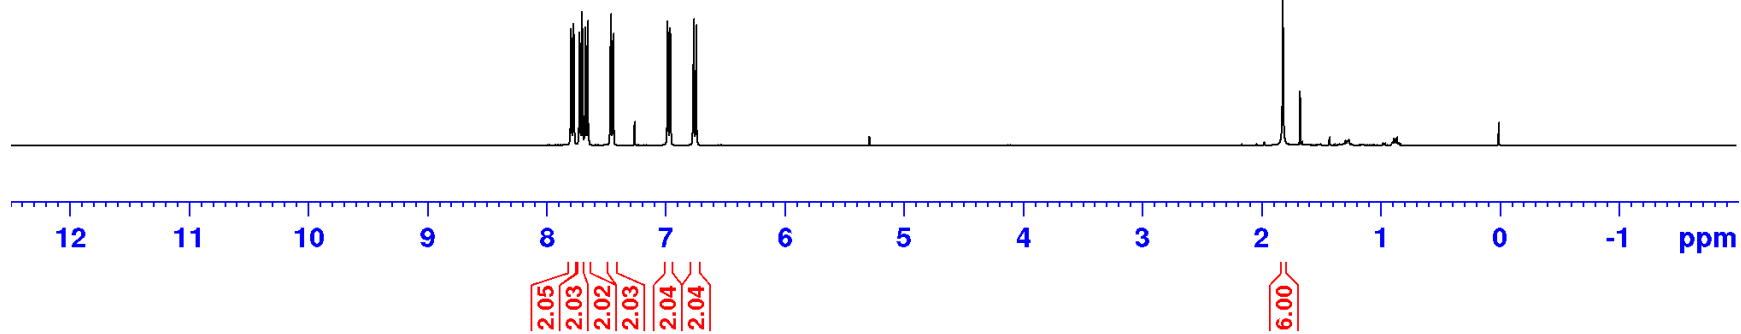

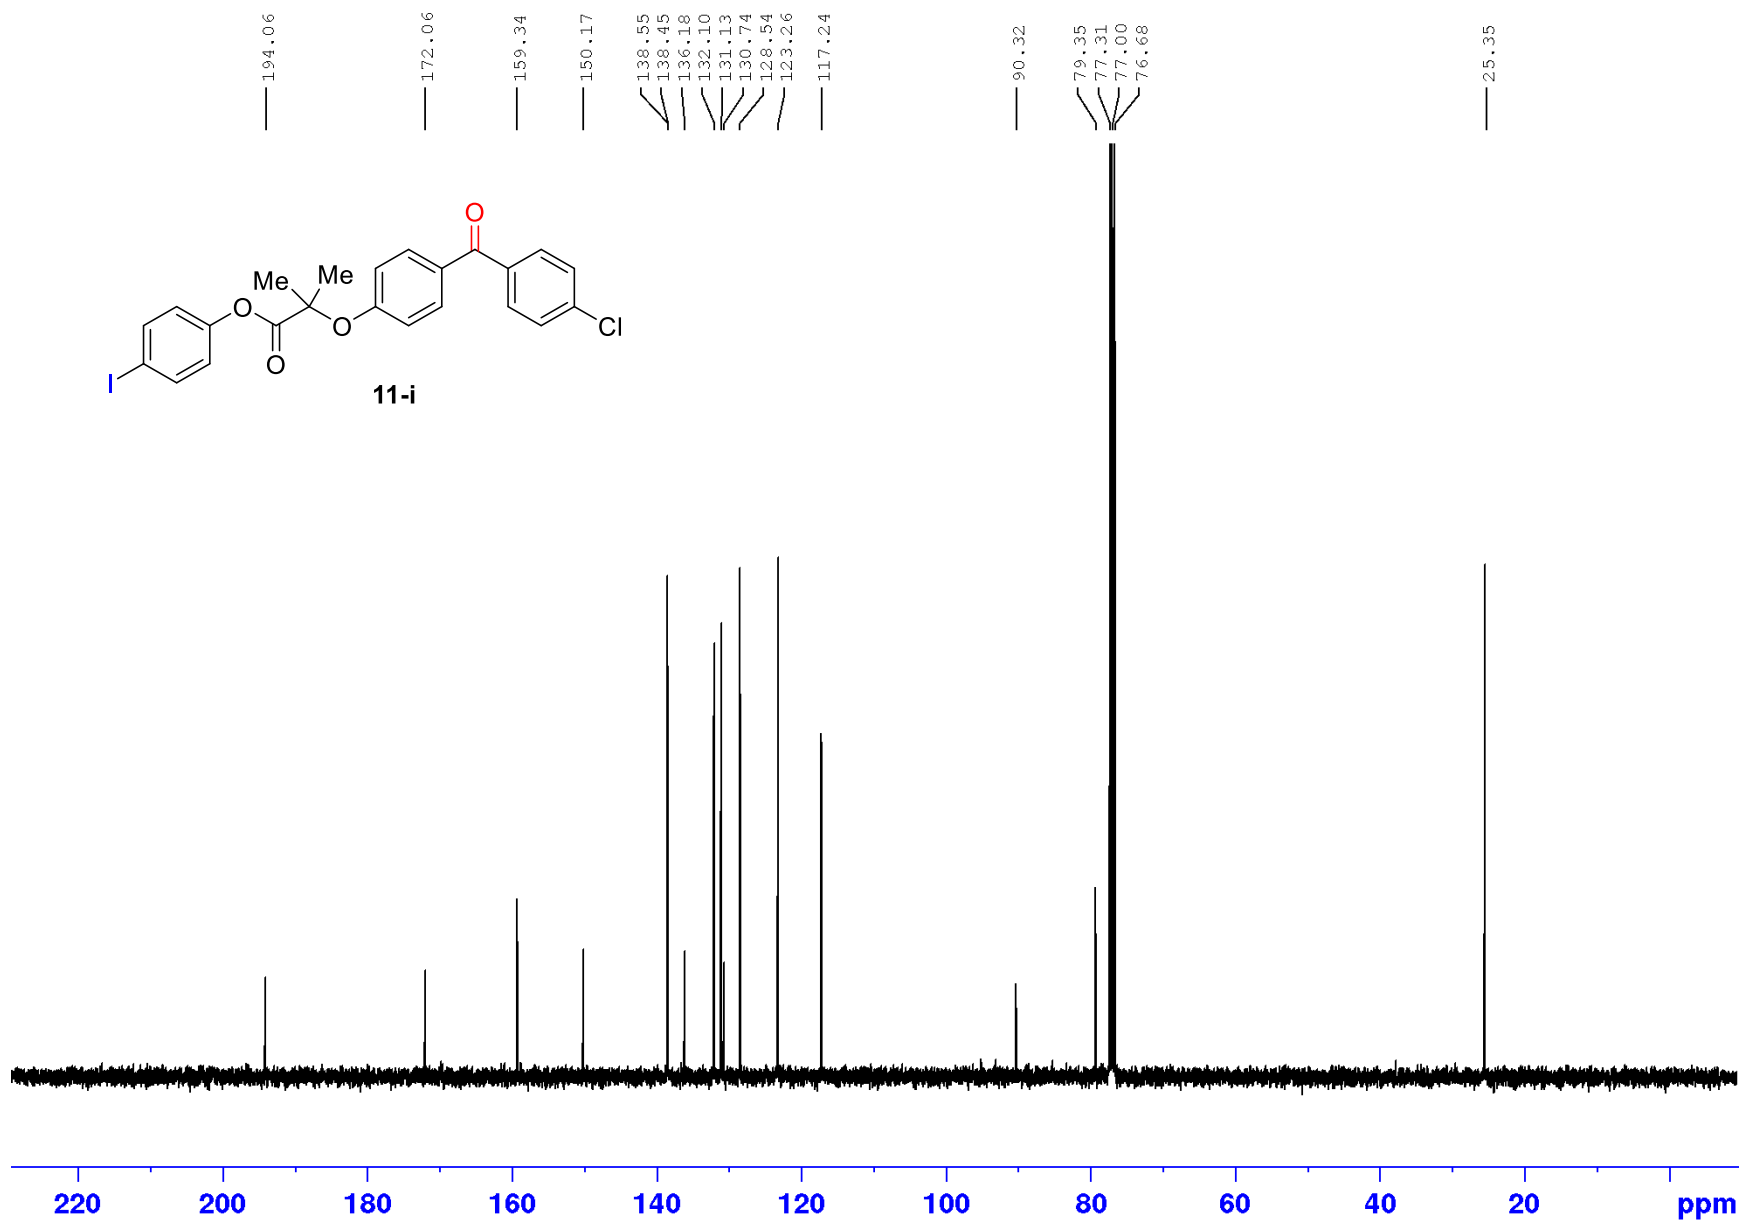

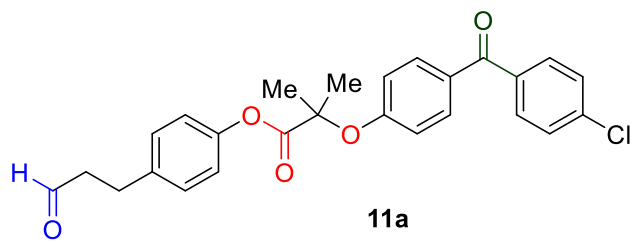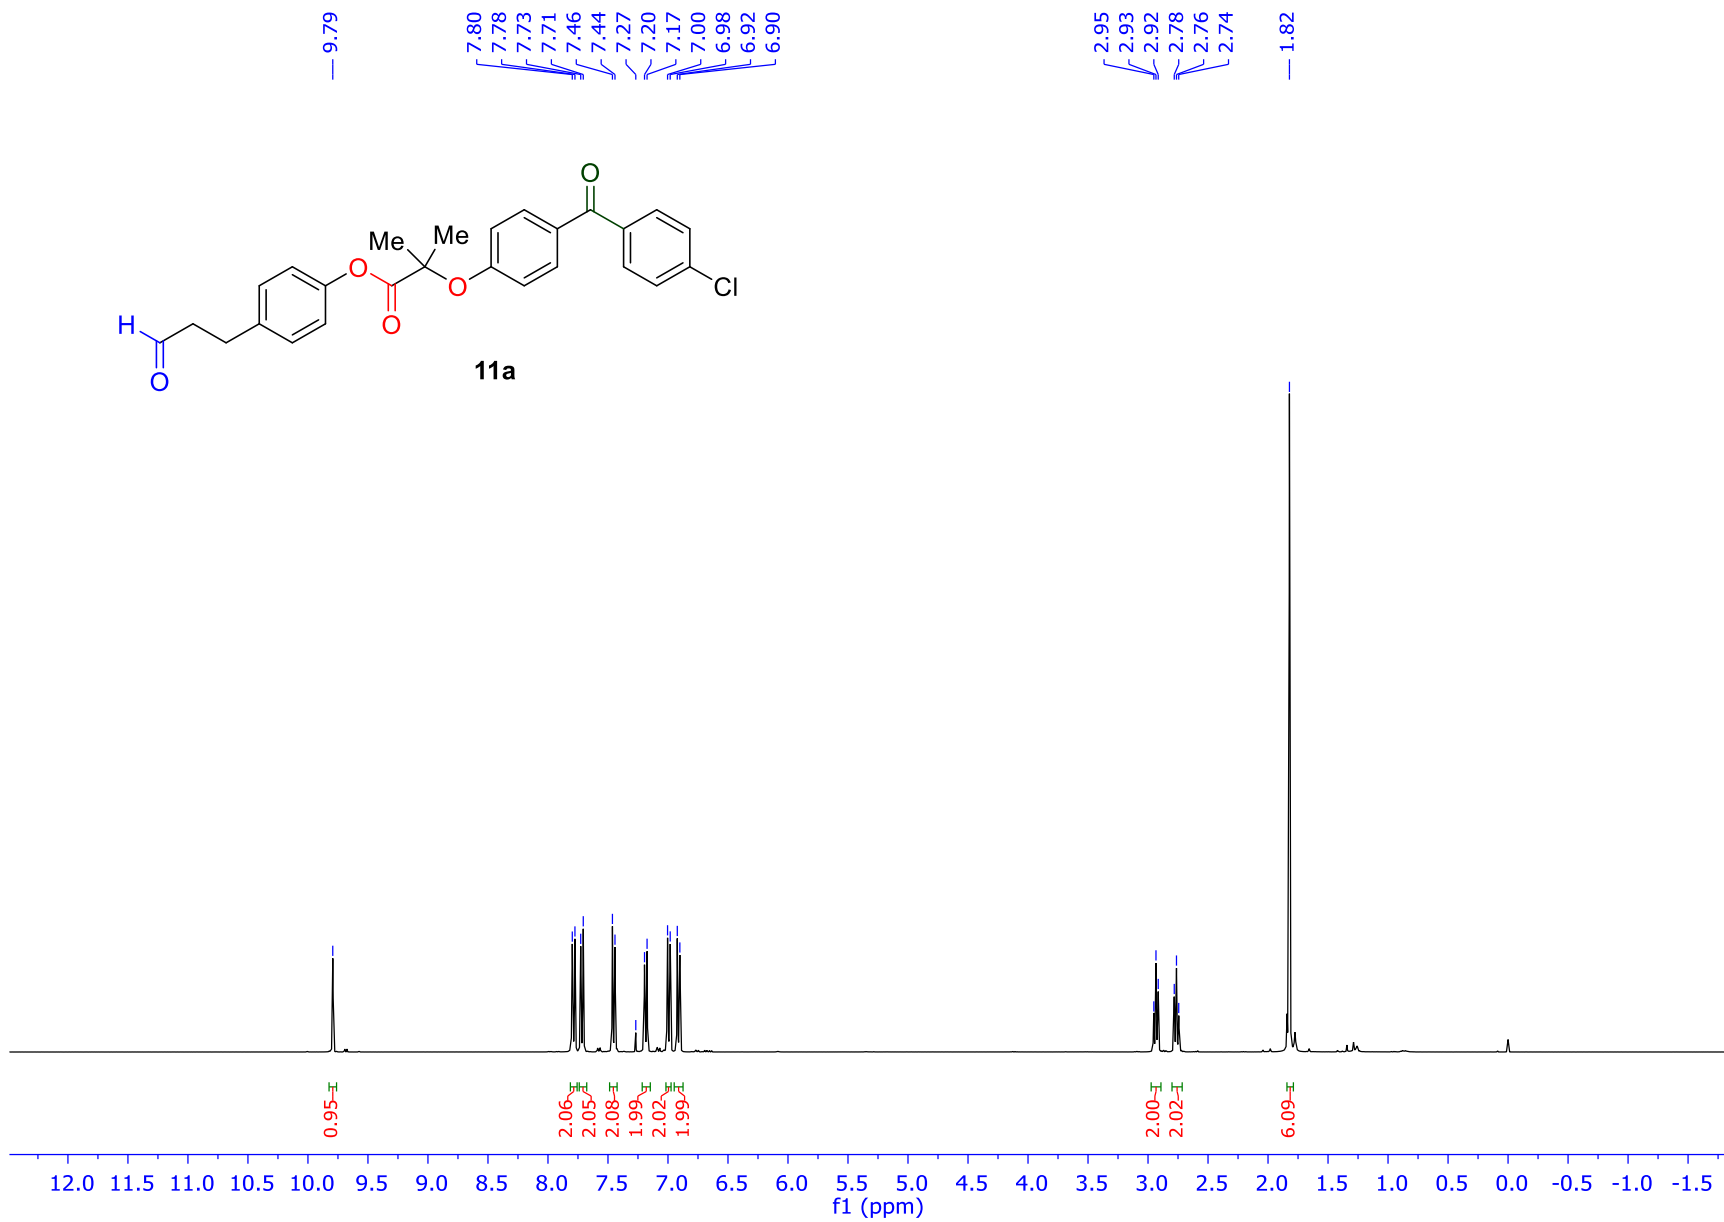

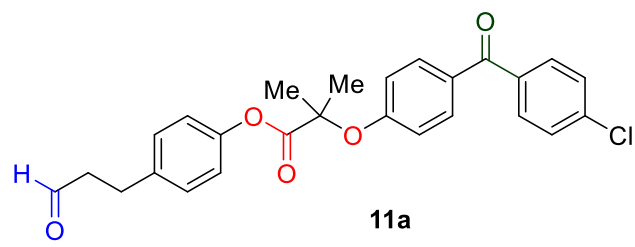

— 201.02

— 194.10

— 172.41

— 159.45

— 148.70

— 138.42

— 138.37

— 136.21

— 132.05

— 131.11

— 130.58

— 129.33

— 128.50

— 121.11

— 117.25

— 79.37

— 77.32

— 77.00

— 76.68

— 45.08

— 27.32

— 25.35

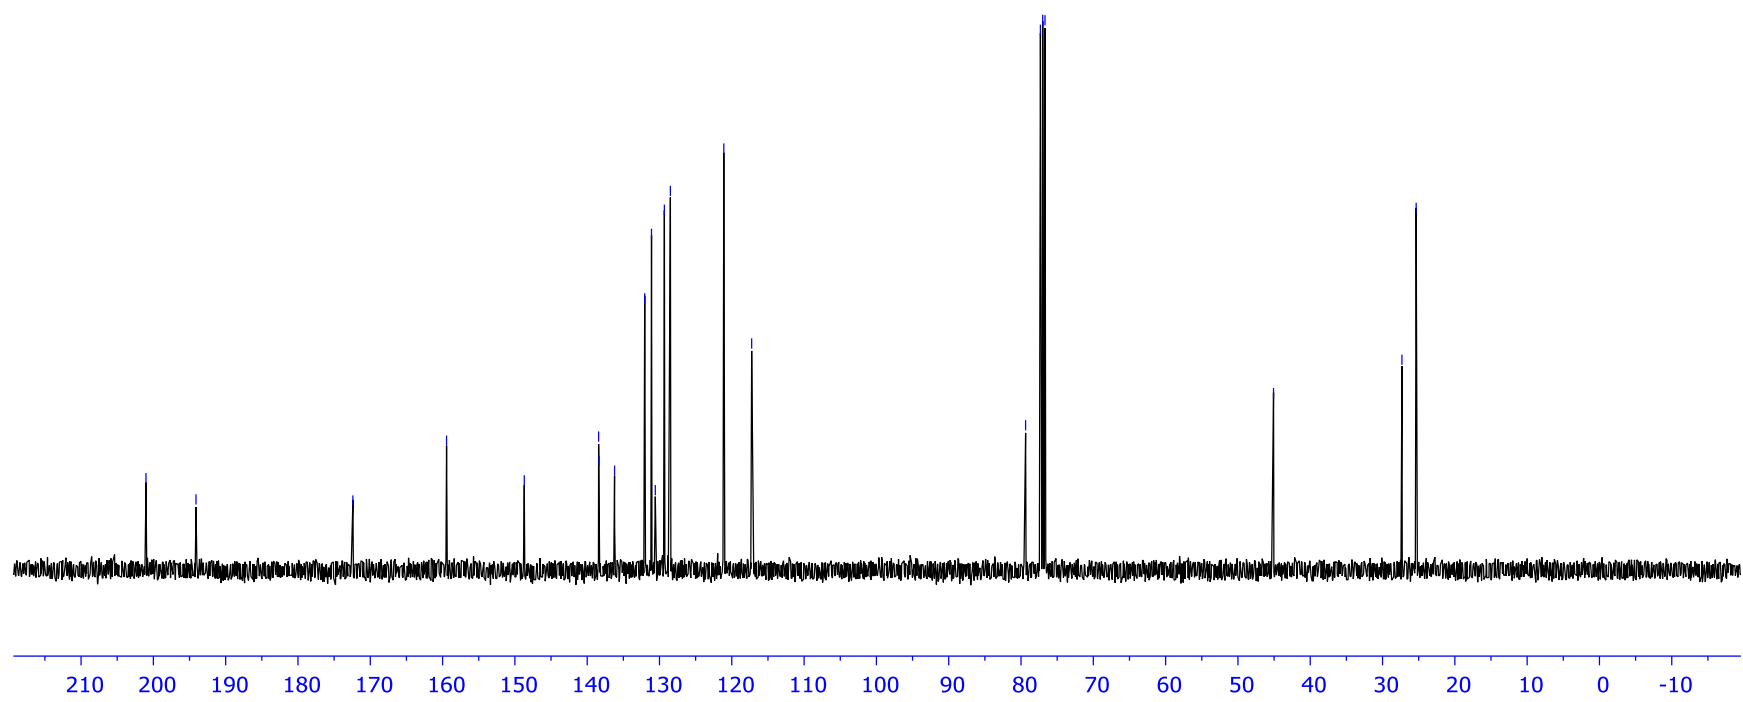

**Copies of  $^1\text{H}$  NMR and  $^{13}\text{C}$  NMR spectra of all olefinated compounds**



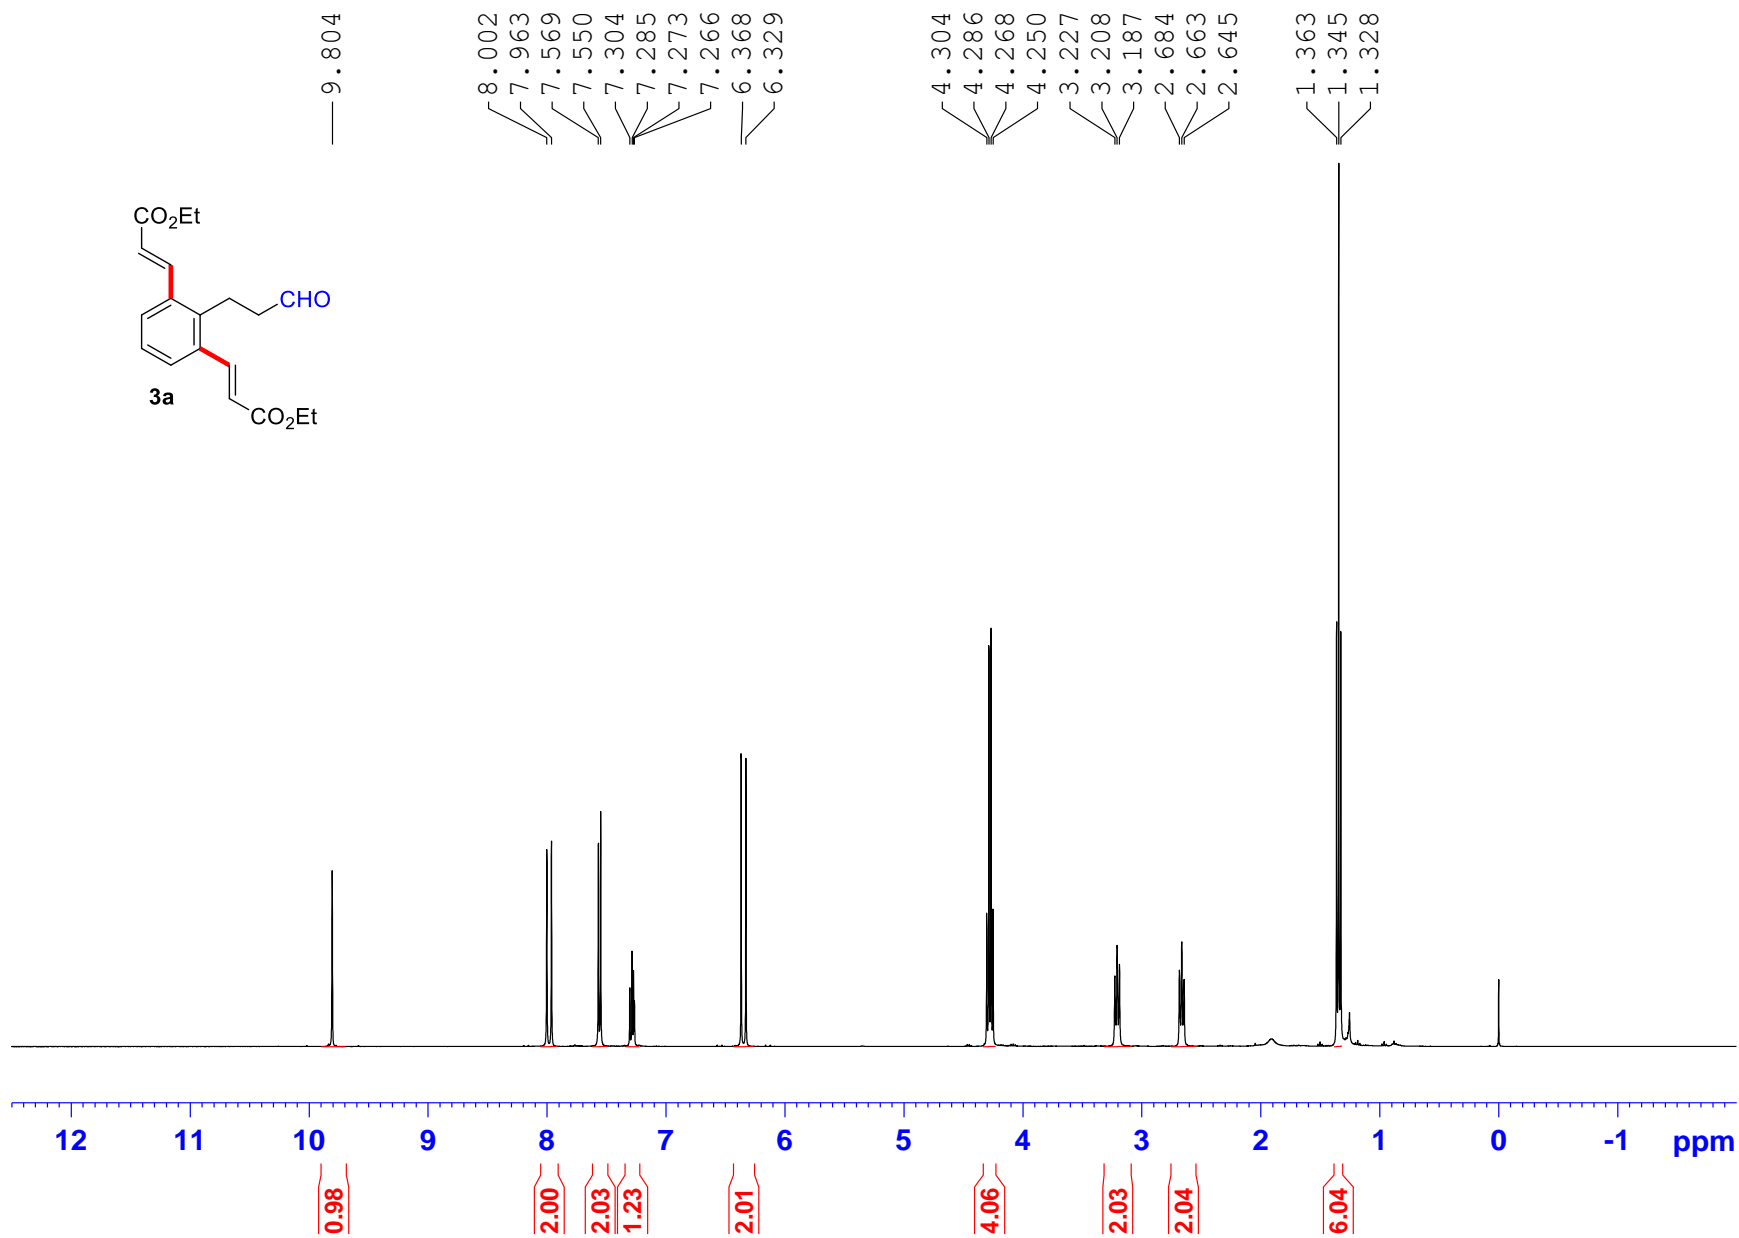

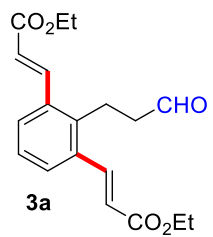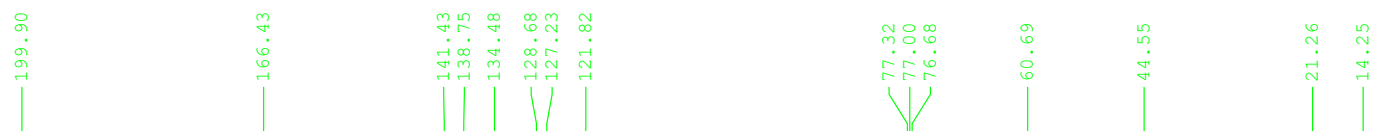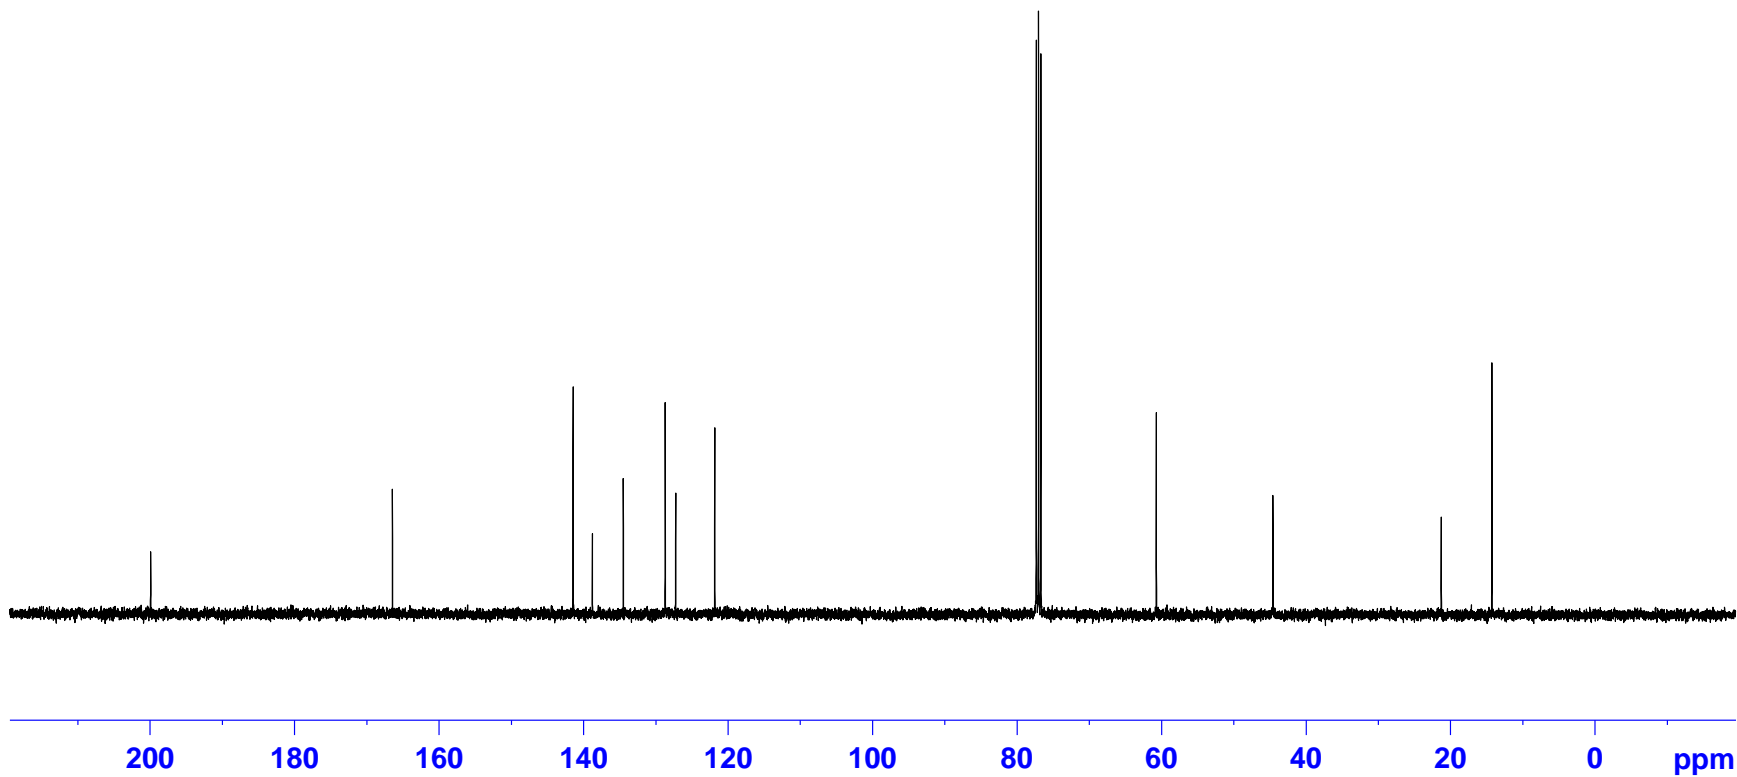

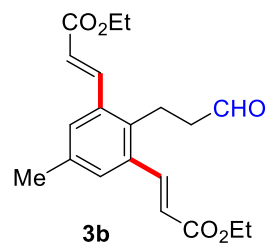

— 9.792

< 7.978  
< 7.939

— 7.385

< 6.363  
< 6.324

< 4.298  
< 4.281  
< 4.263  
< 4.245

< 3.185  
< 3.166  
< 3.146

< 2.654  
< 2.634

< 2.615  
< 2.354

< 1.360  
< 1.342  
< 1.325

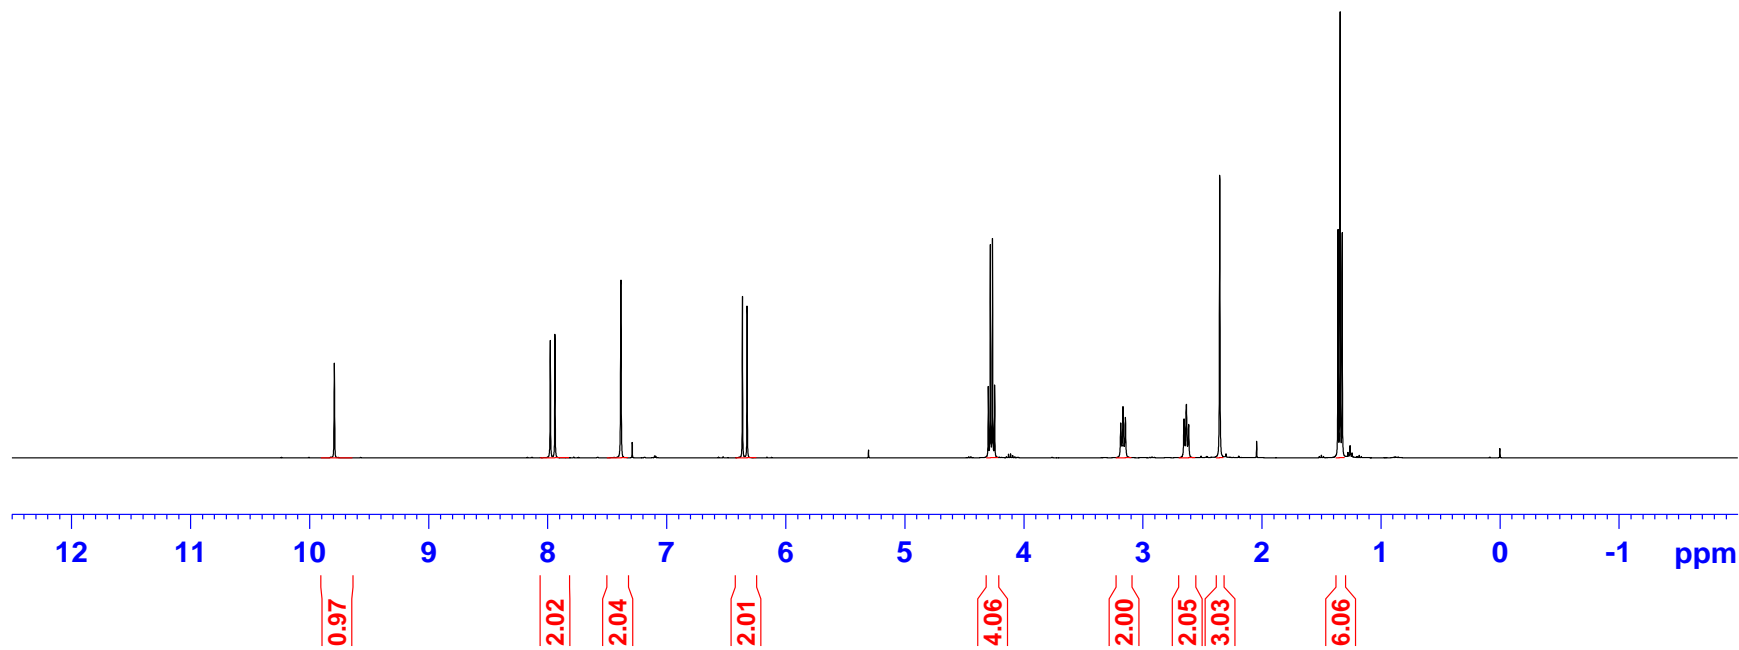

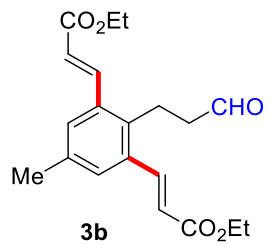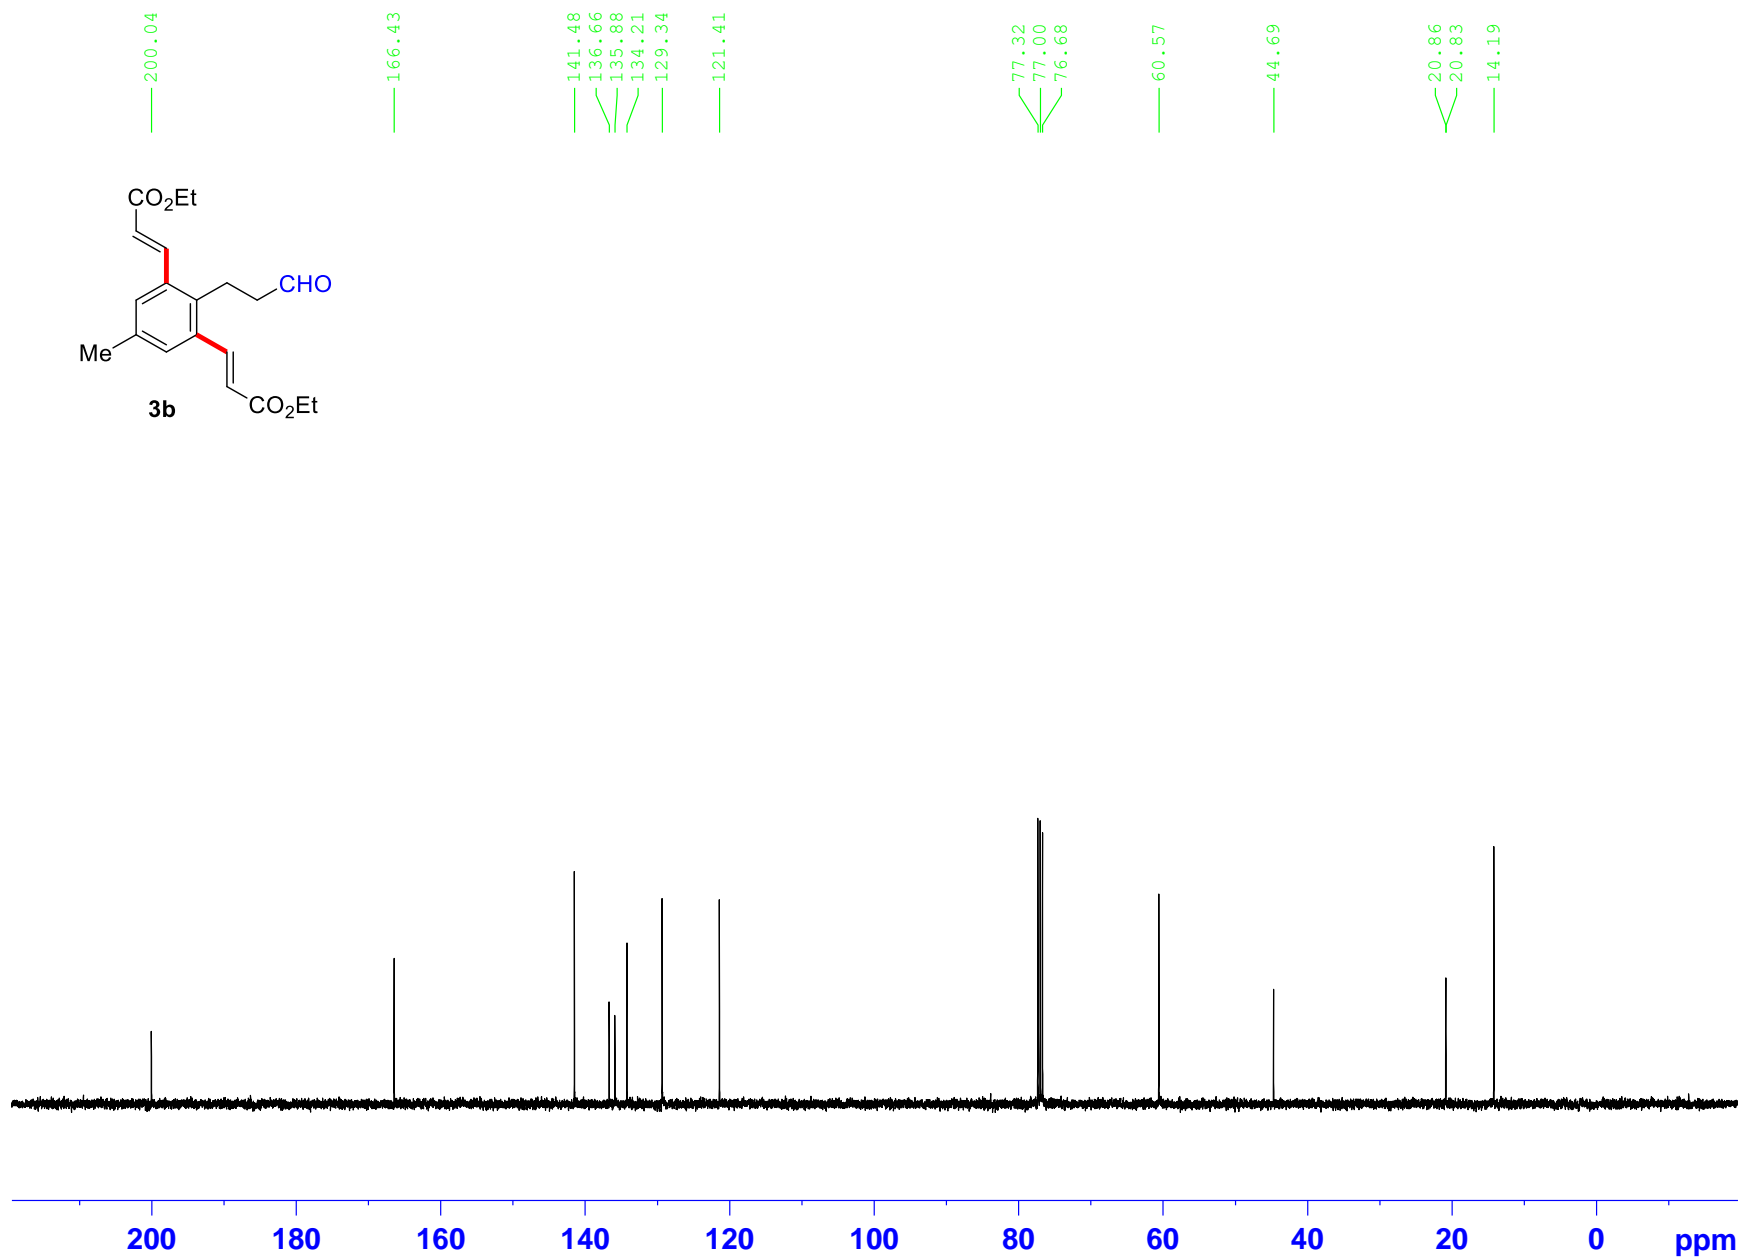

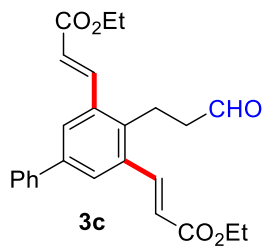

9.823

8.050  
8.011  
7.764  
7.590  
7.572  
7.486  
7.468  
7.449  
7.411  
7.393  
7.374  
7.266  
6.451  
6.412

4.314  
4.297  
4.279  
4.261  
3.256  
3.237  
3.217  
2.718  
2.698  
2.679

1.370  
1.352  
1.334

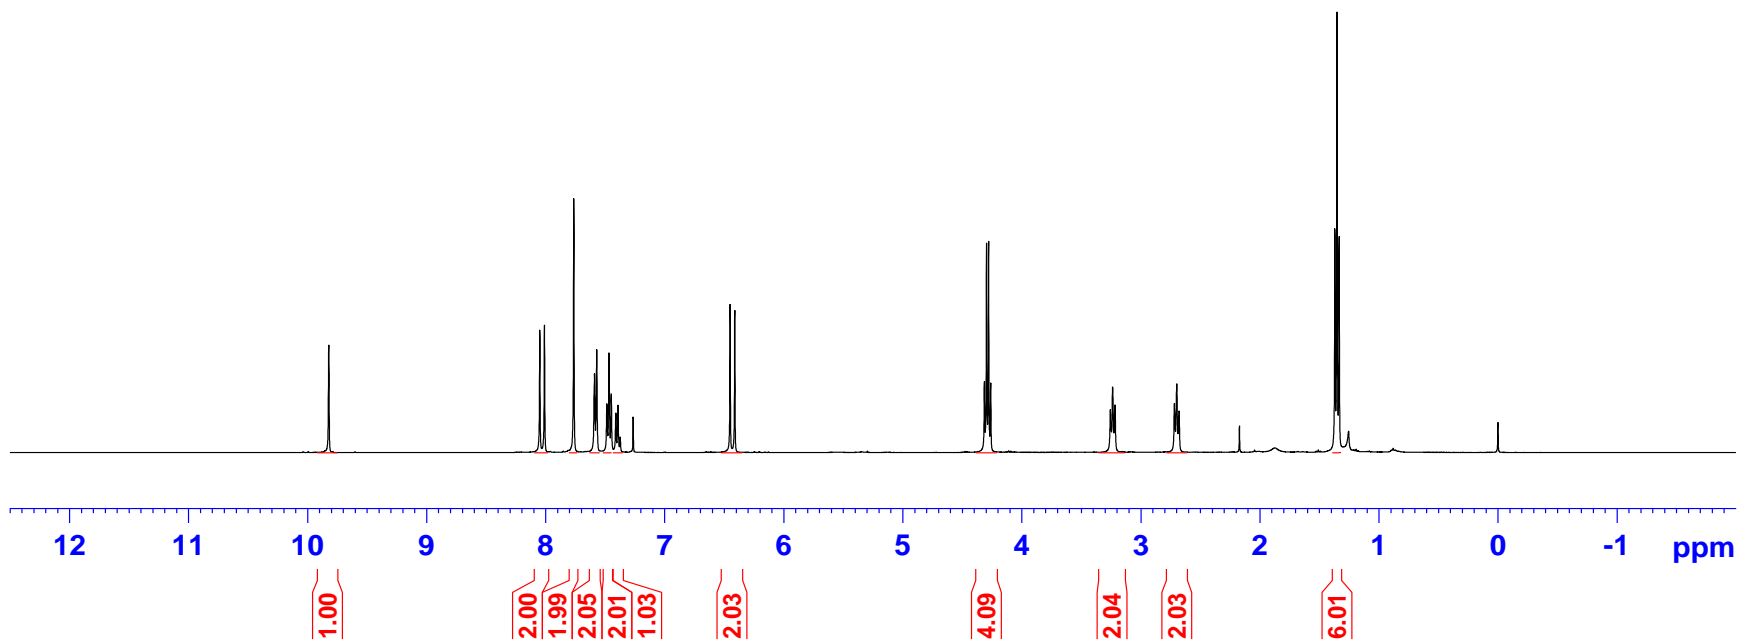

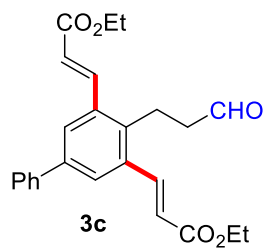

199.90

166.39

141.50  
140.21  
139.53  
137.62  
134.96  
128.94  
127.92  
127.30  
126.92  
122.07

77.32  
77.00  
76.68

60.73

44.56

21.11

14.25

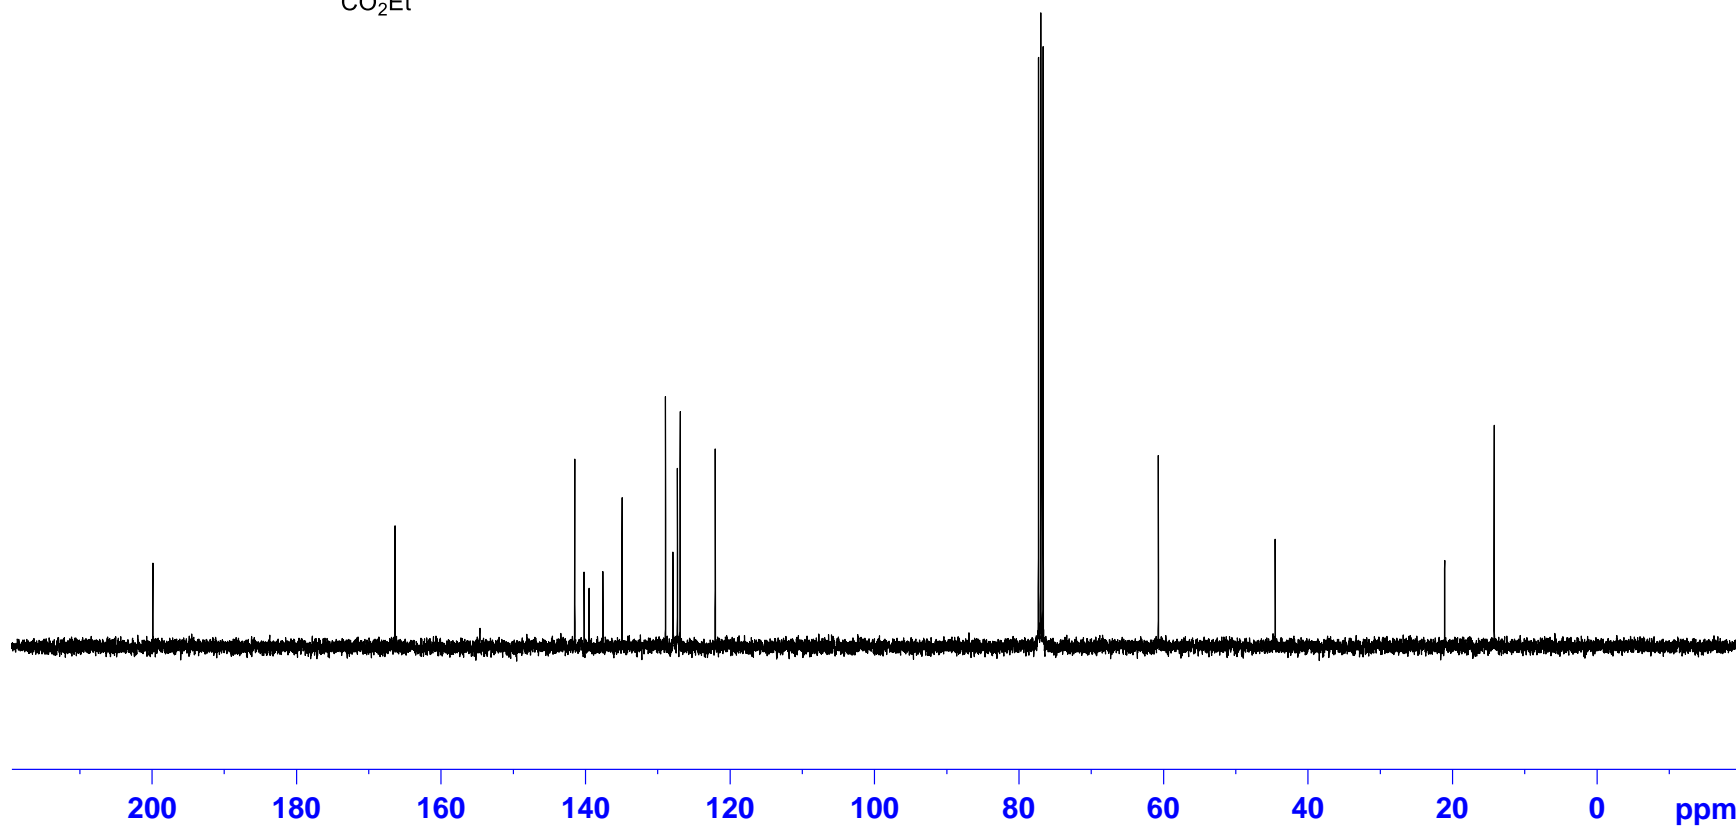

S238

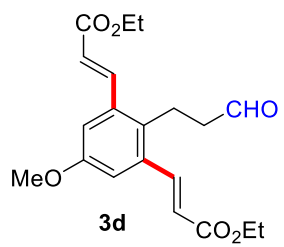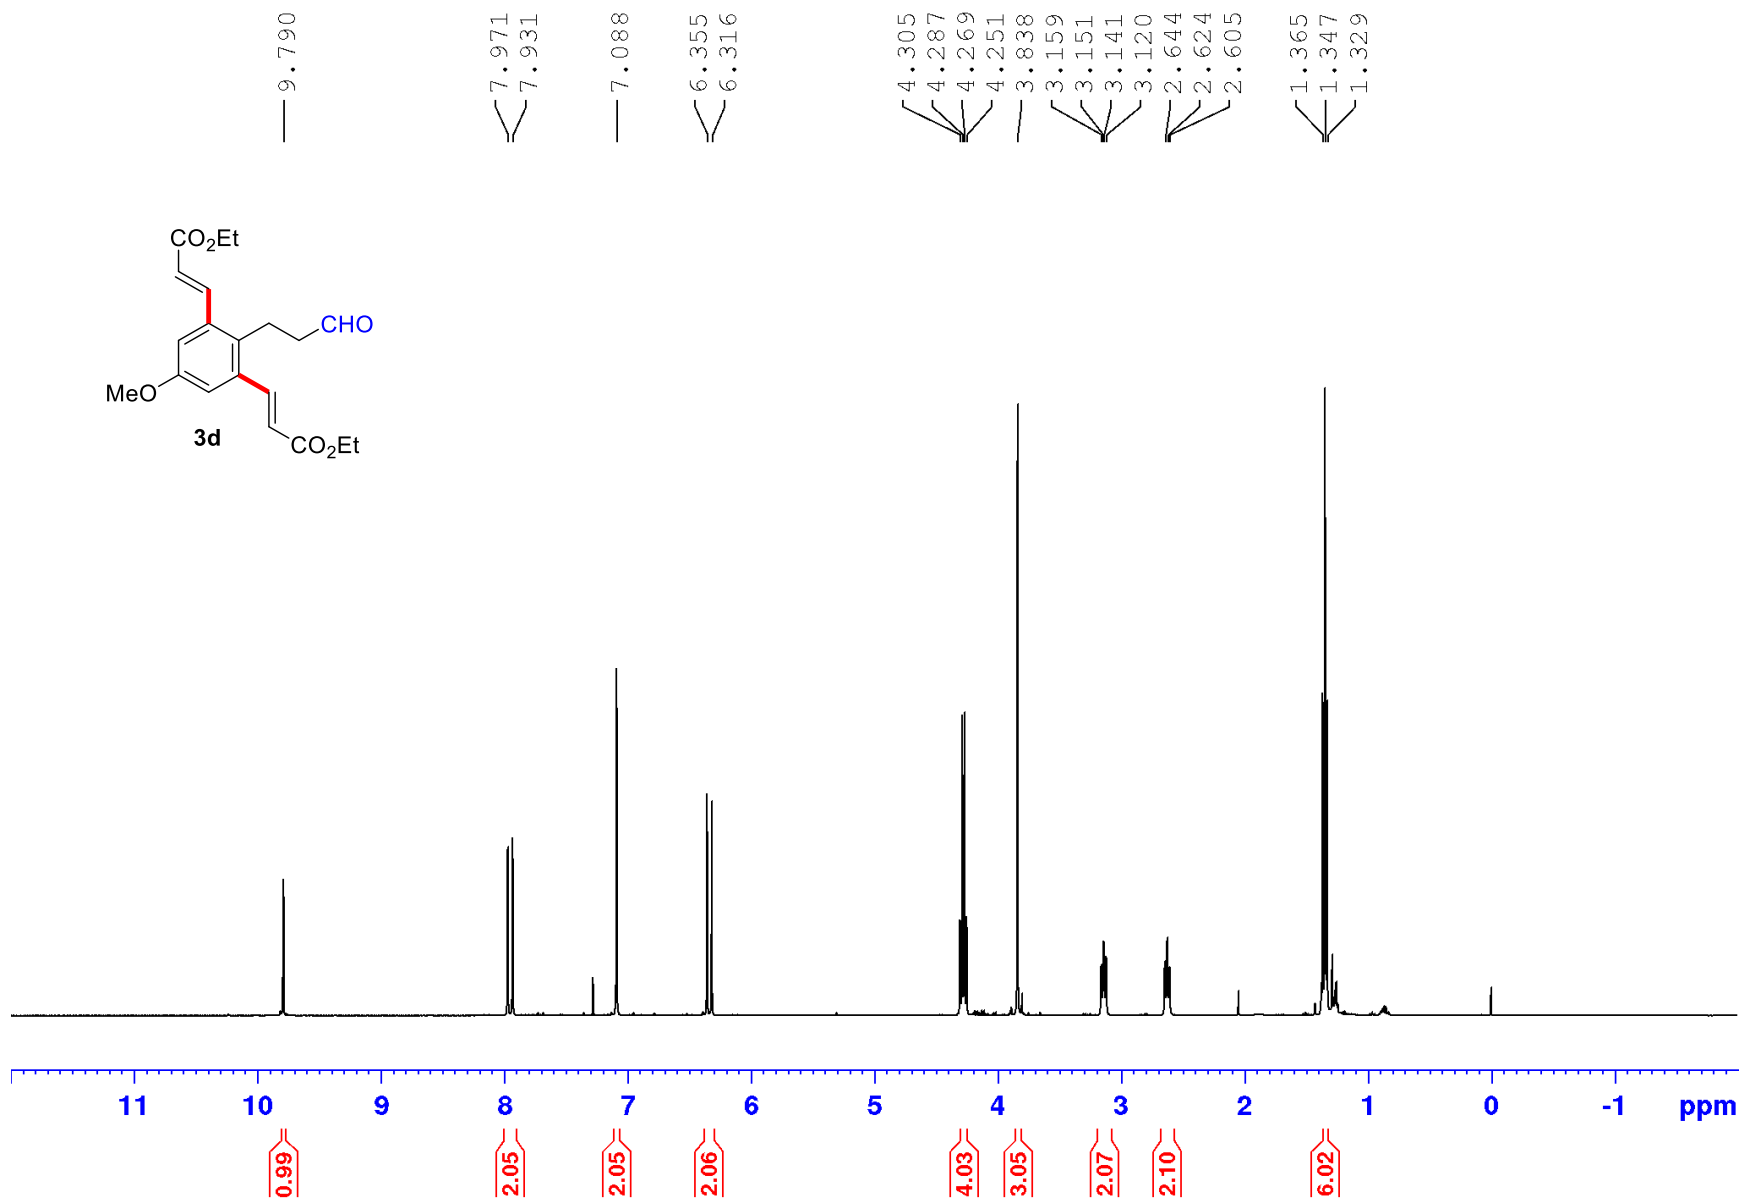

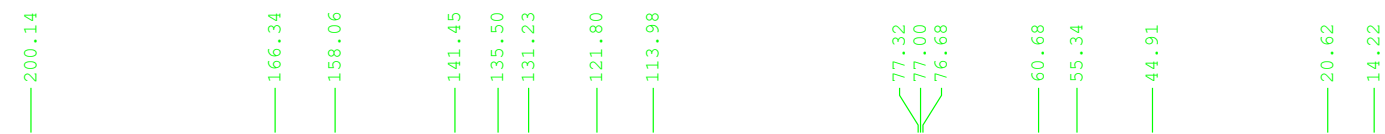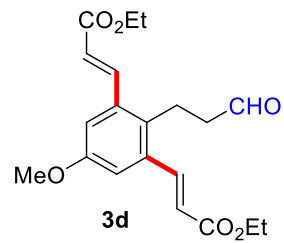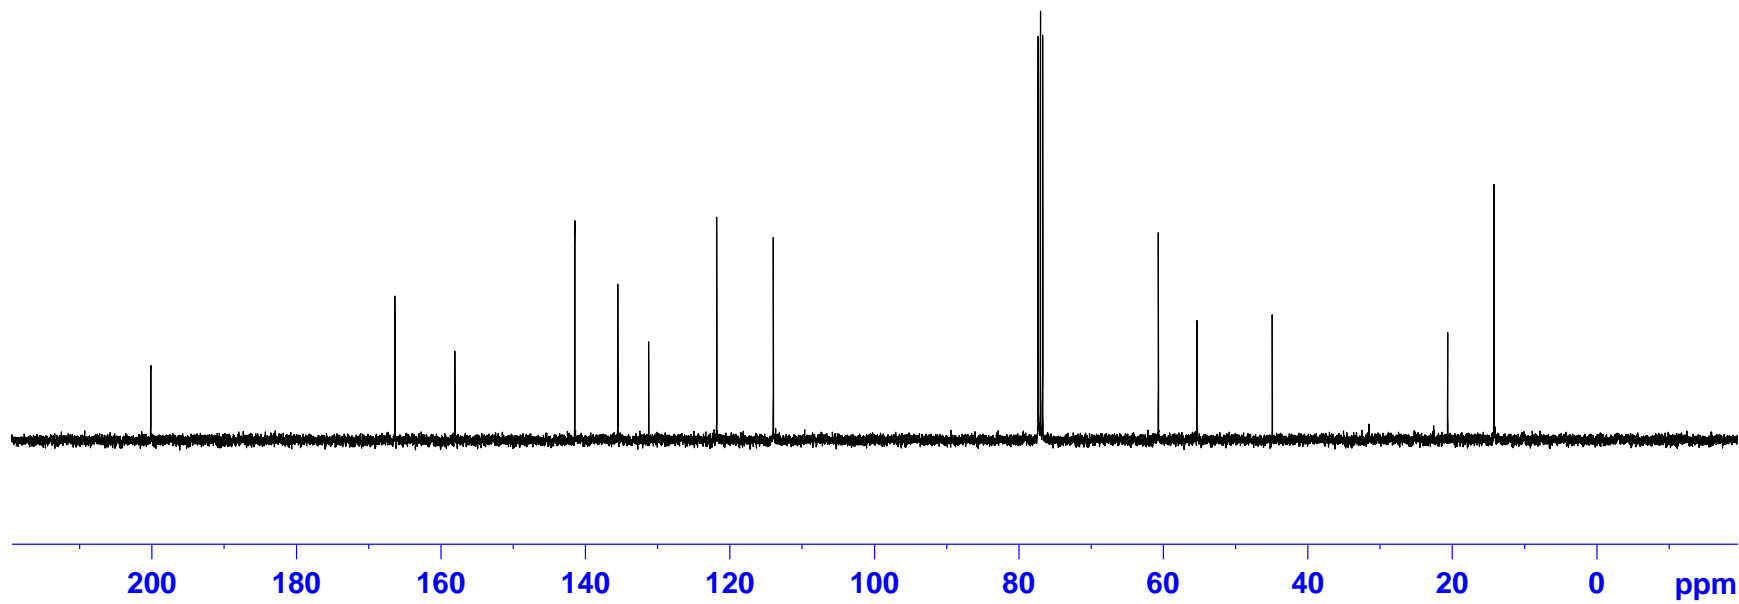

S240



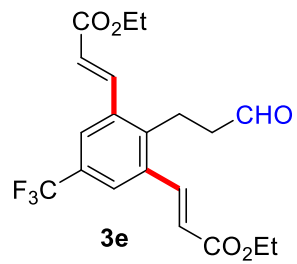

— 9.819

{ 8.001  
 { 7.962  
 { 7.777  
 — 7.286

{ 6.451  
 { 6.412

{ 4.336  
 { 4.318  
 { 4.300  
 { 4.282  
 { 3.266  
 { 3.247  
 { 3.226  
 { 2.724  
 { 2.703  
 { 2.684

{ 1.387  
 { 1.369  
 { 1.352

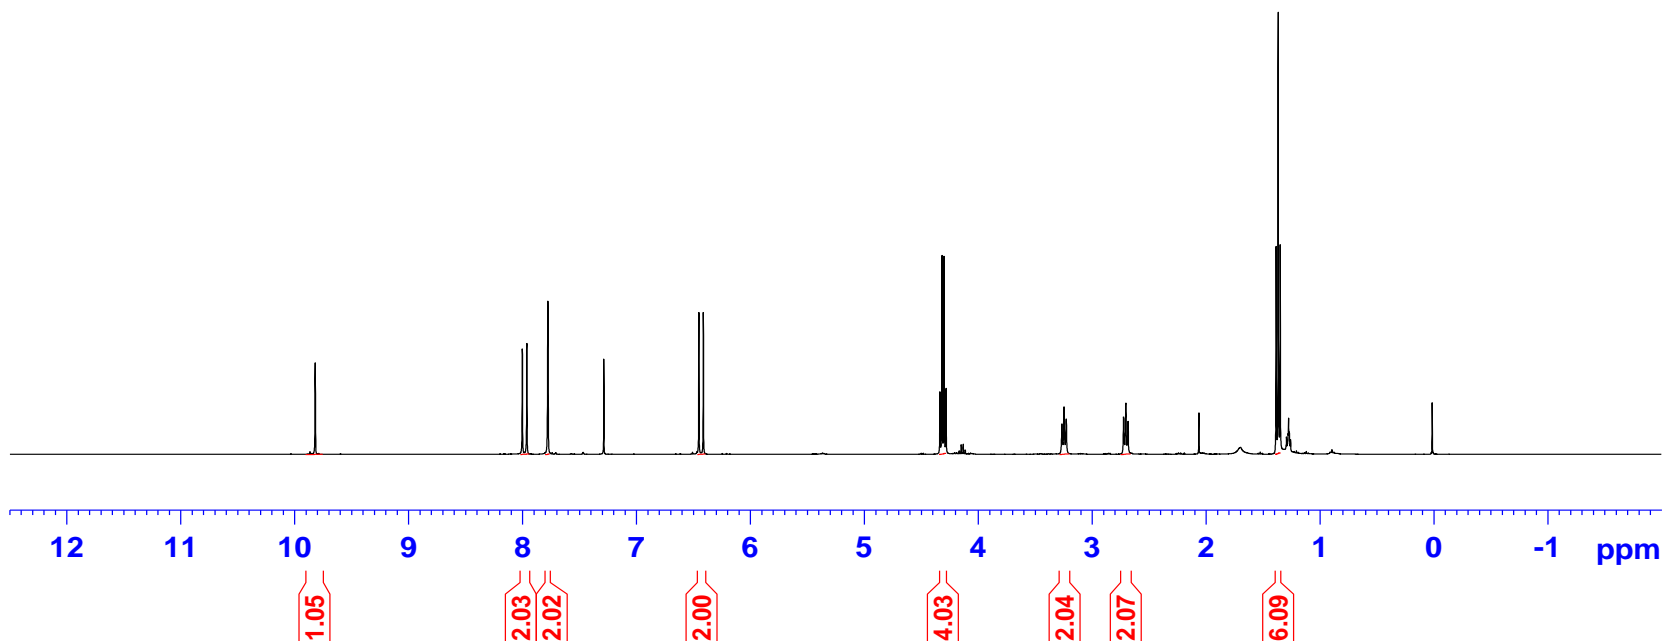

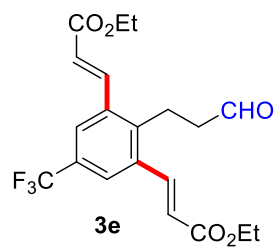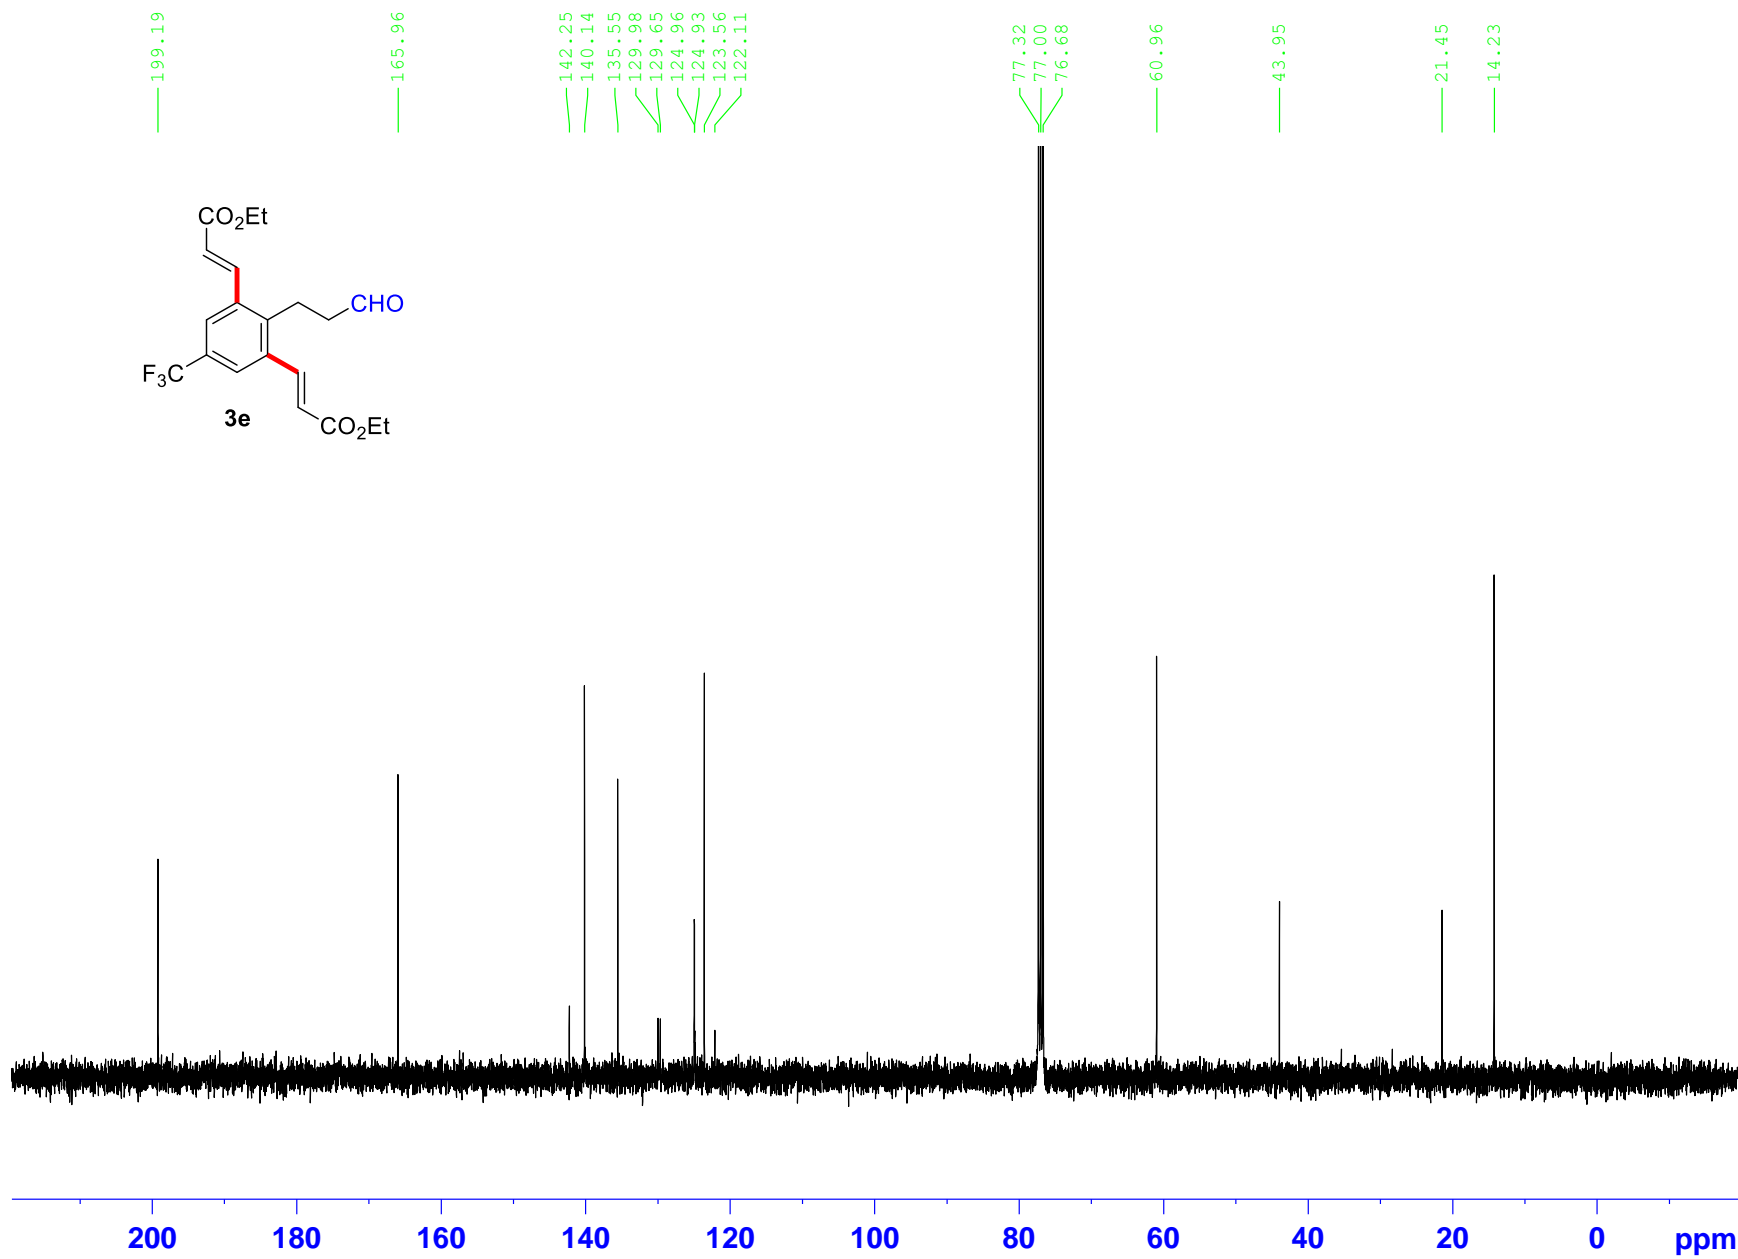

S242

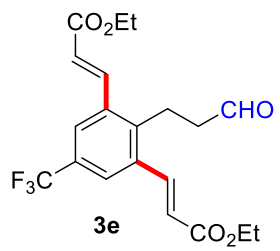

--62.961

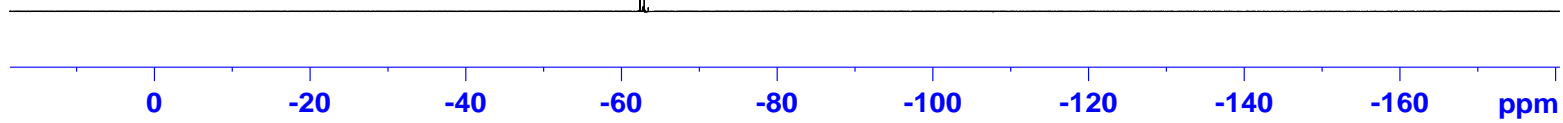

S243

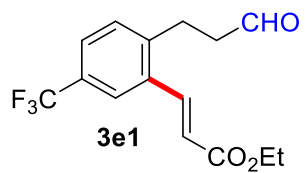

— 9.813

7.955  
 7.915  
 7.787  
 7.566  
 7.563  
 7.546  
 7.543  
 7.384  
 7.364  
 7.275  
 6.468  
 6.428

4.319  
 4.301  
 4.283  
 4.266  
 3.159  
 3.140  
 3.122  
 2.808  
 2.789  
 2.770

1.372  
 1.354  
 1.337

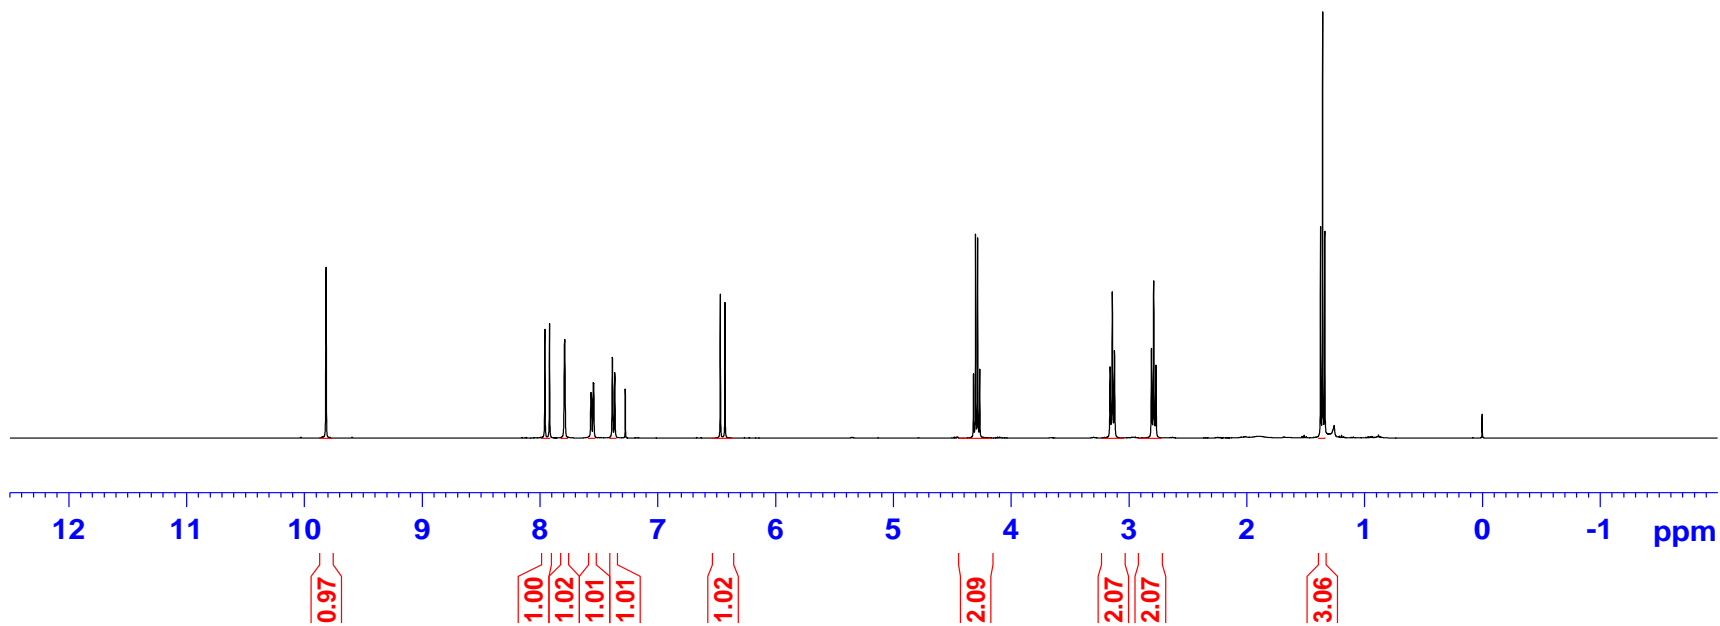

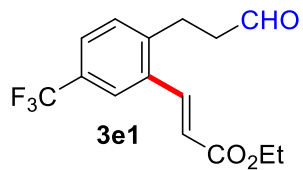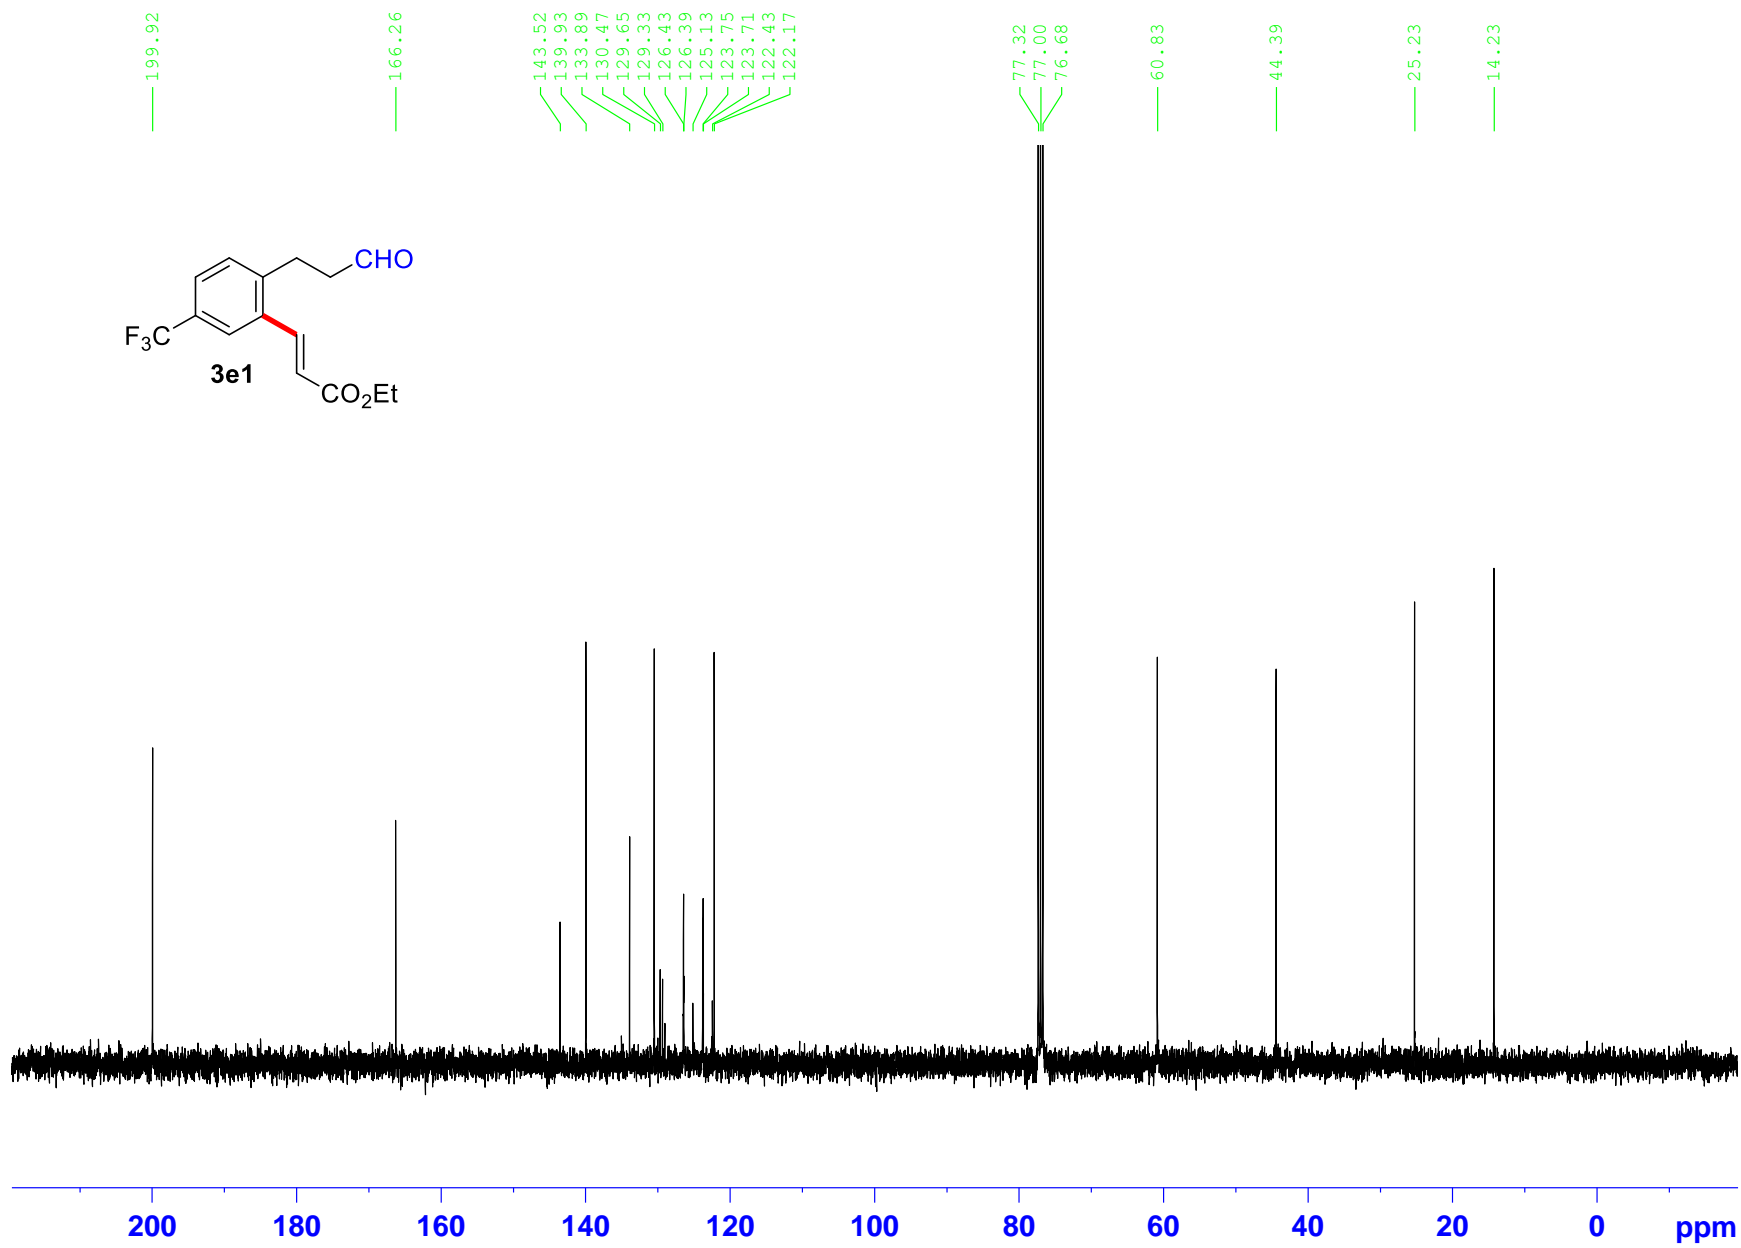

S245

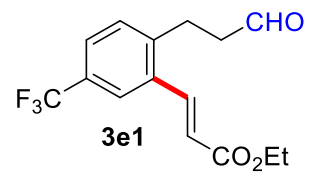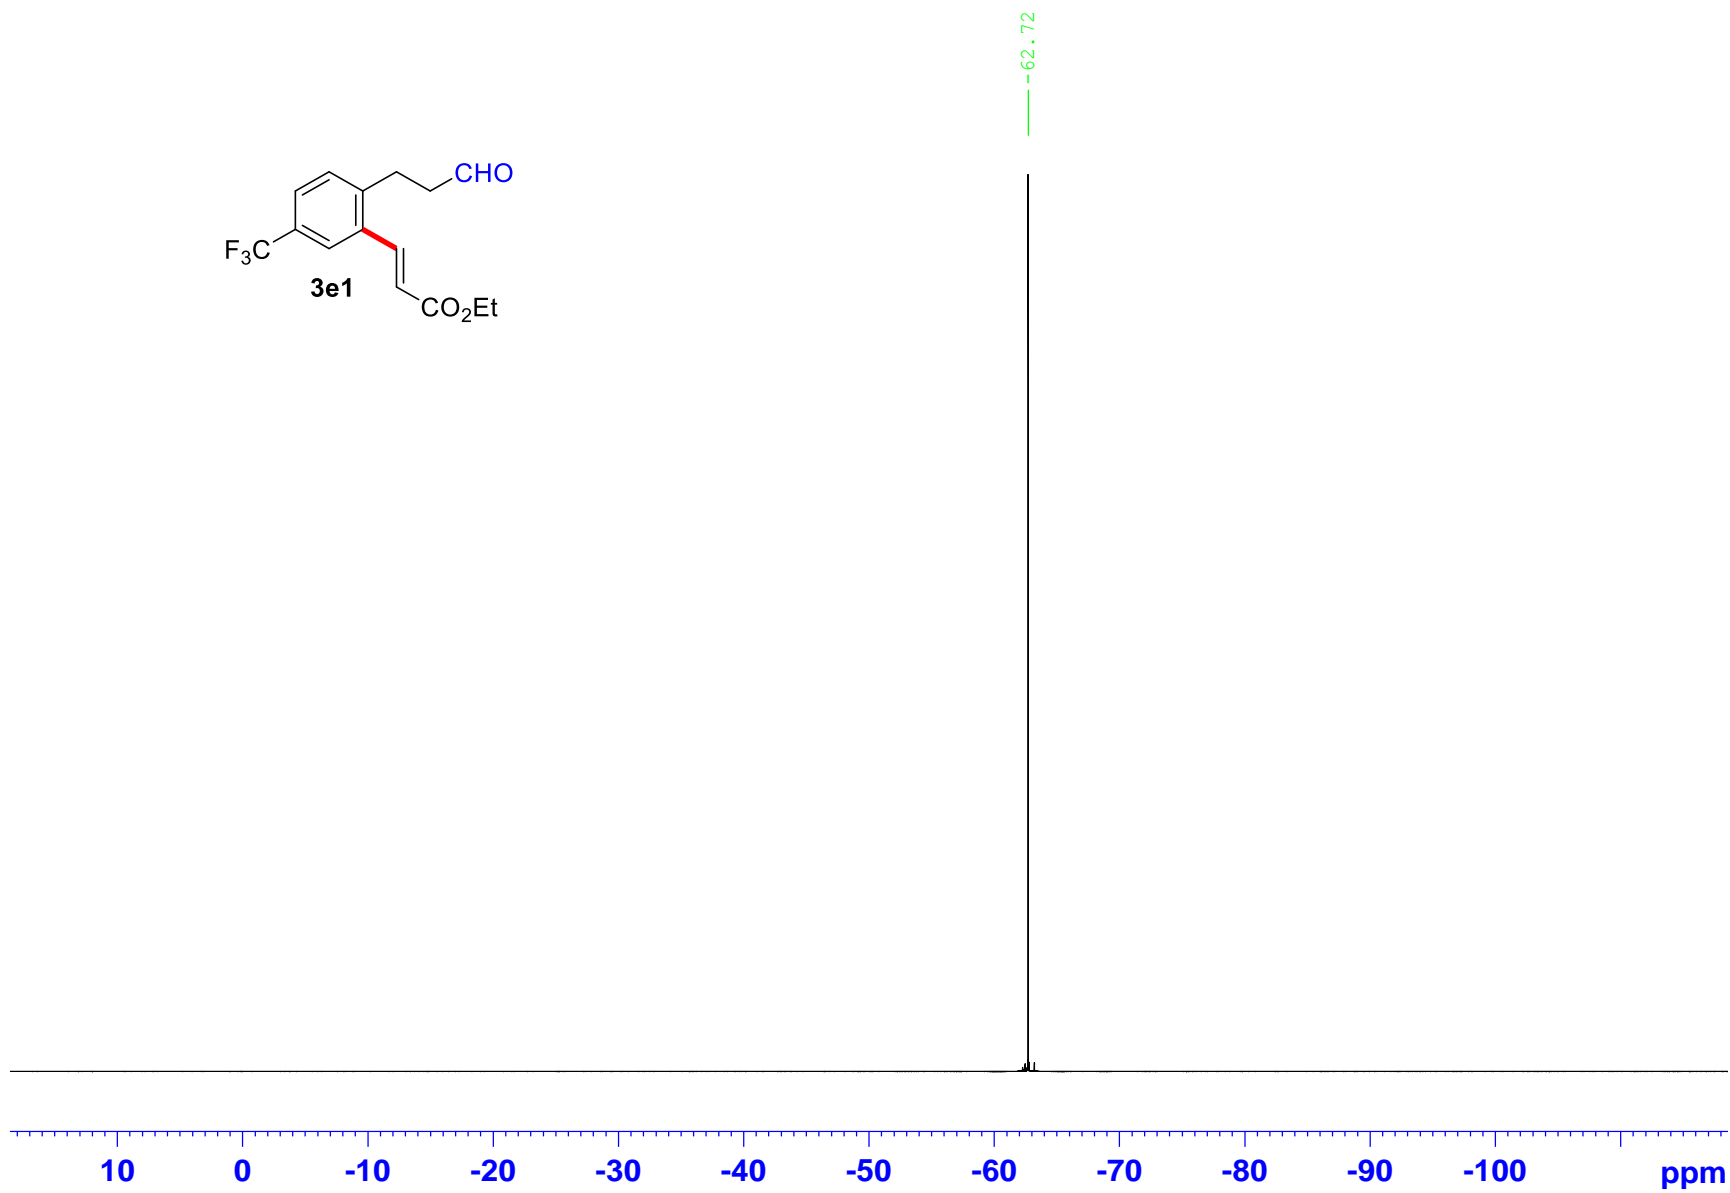

S246

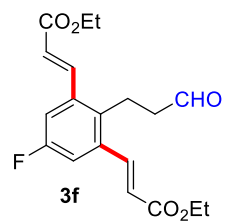

— 9.794

7.948  
 7.946  
 7.909  
 7.906  
 7.283  
 7.268  
 7.245  
 6.359  
 6.320

4.309  
 4.291  
 4.273  
 4.255  
 3.183  
 3.164  
 3.144  
 2.670  
 2.649  
 2.631

1.365  
 1.347  
 1.329

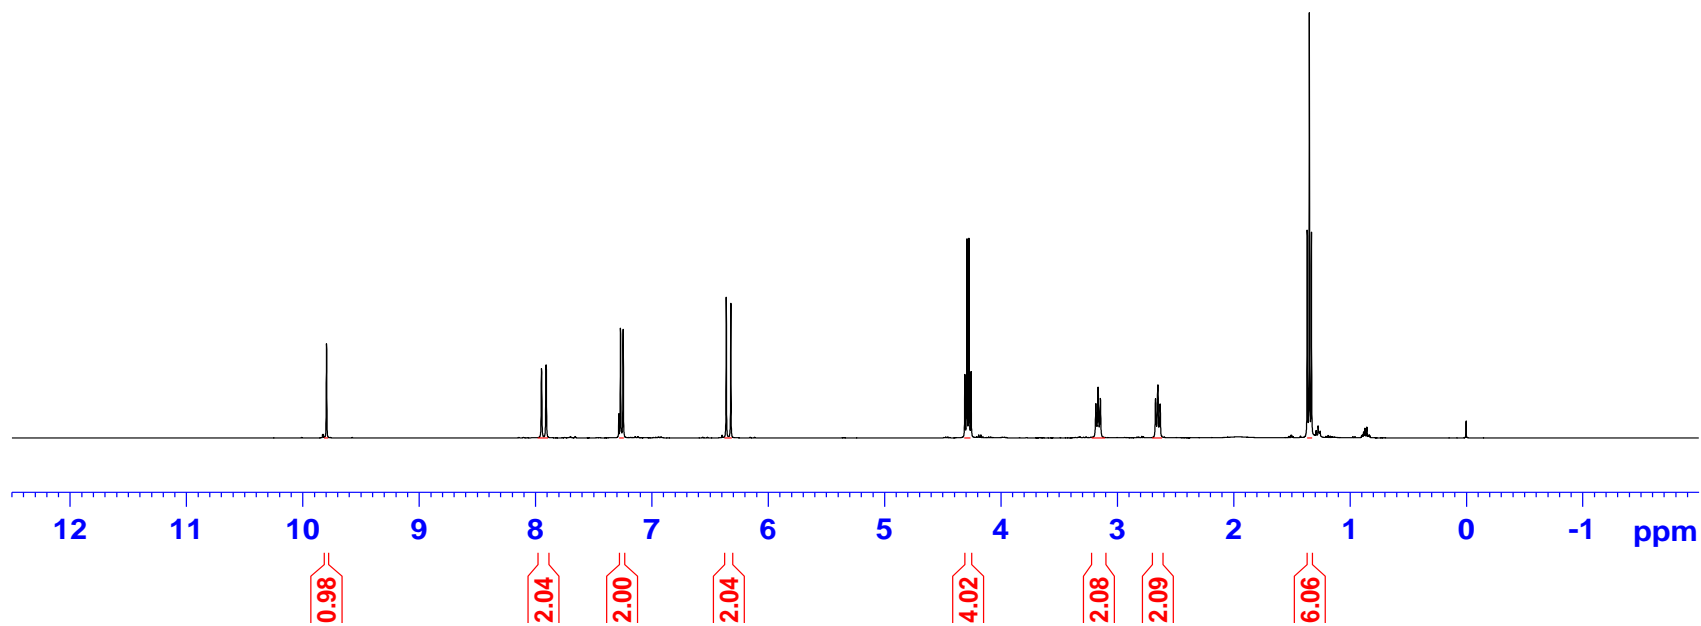

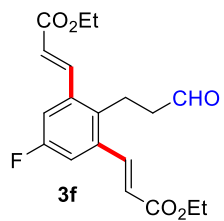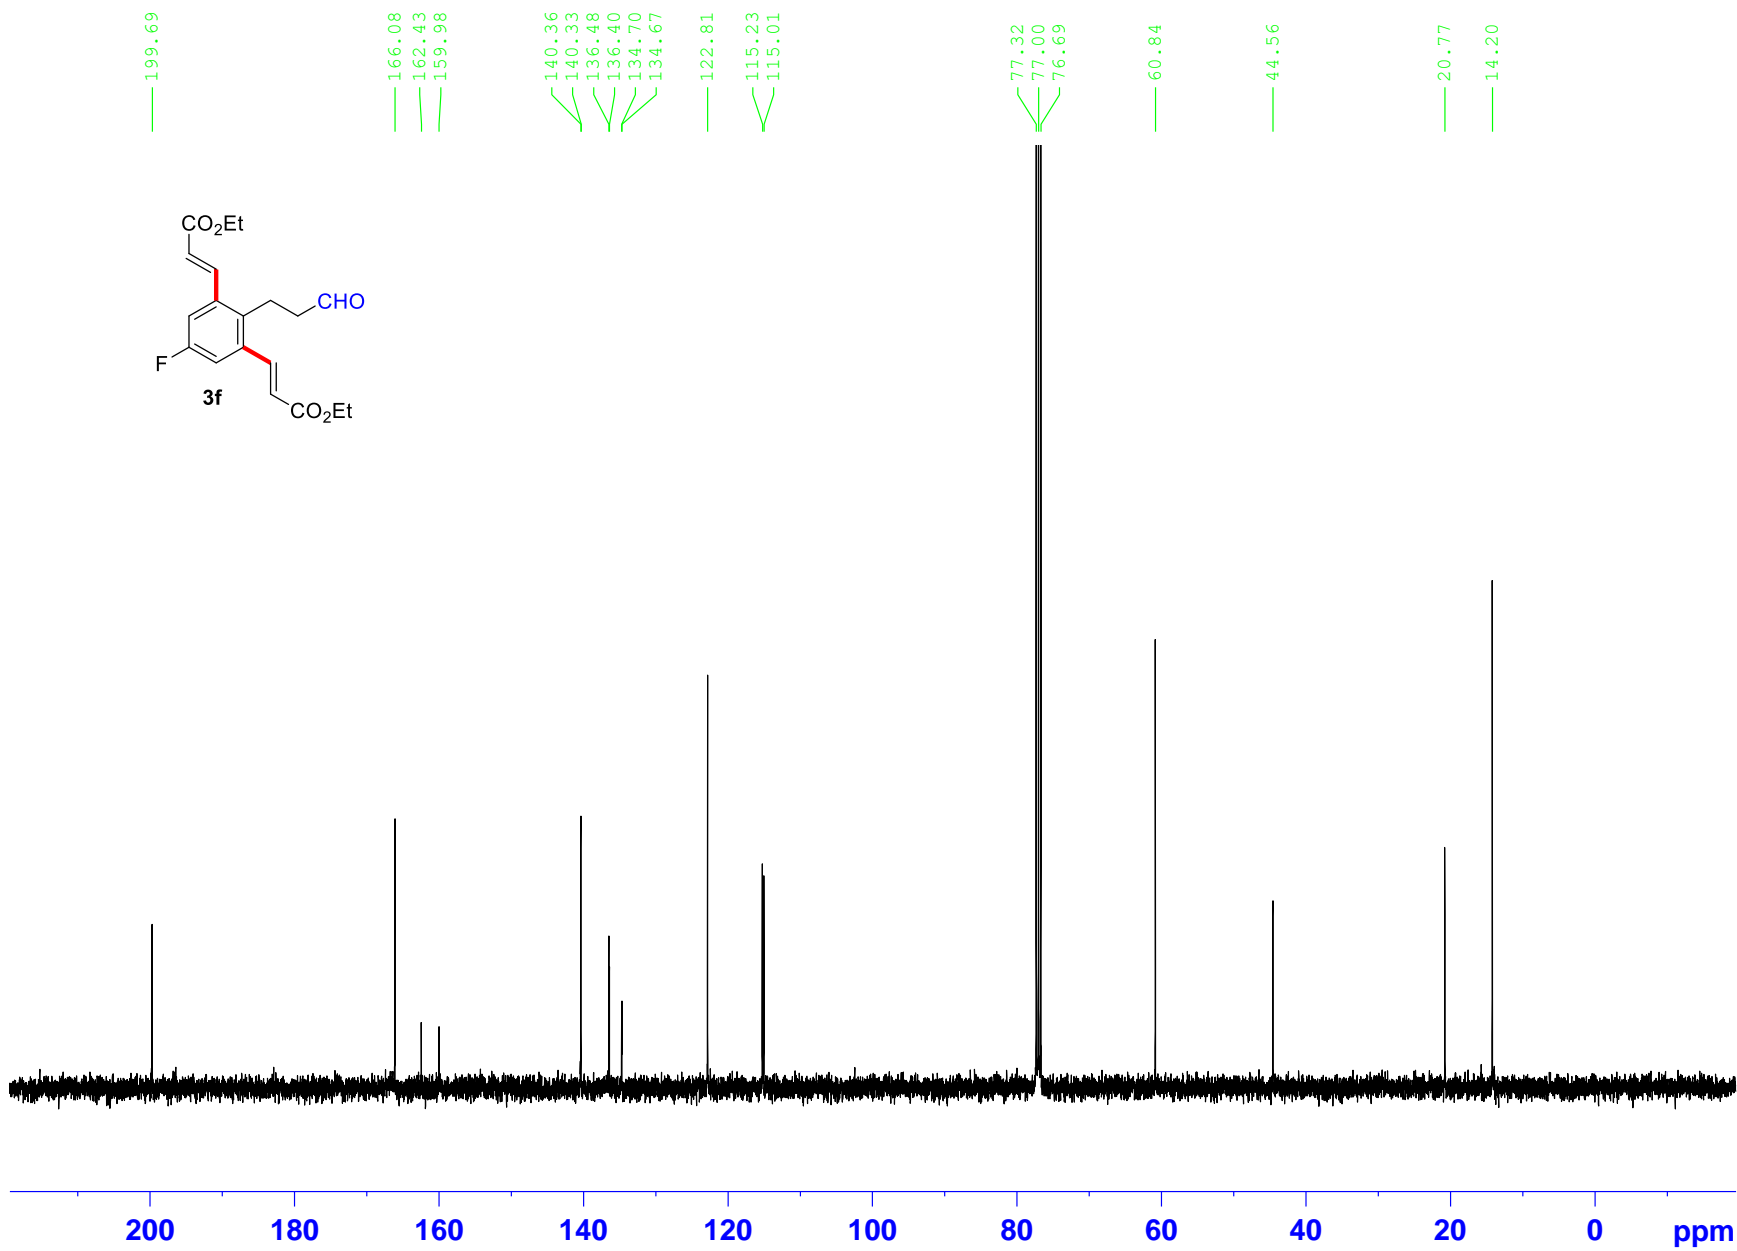

S248



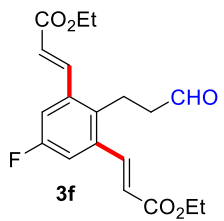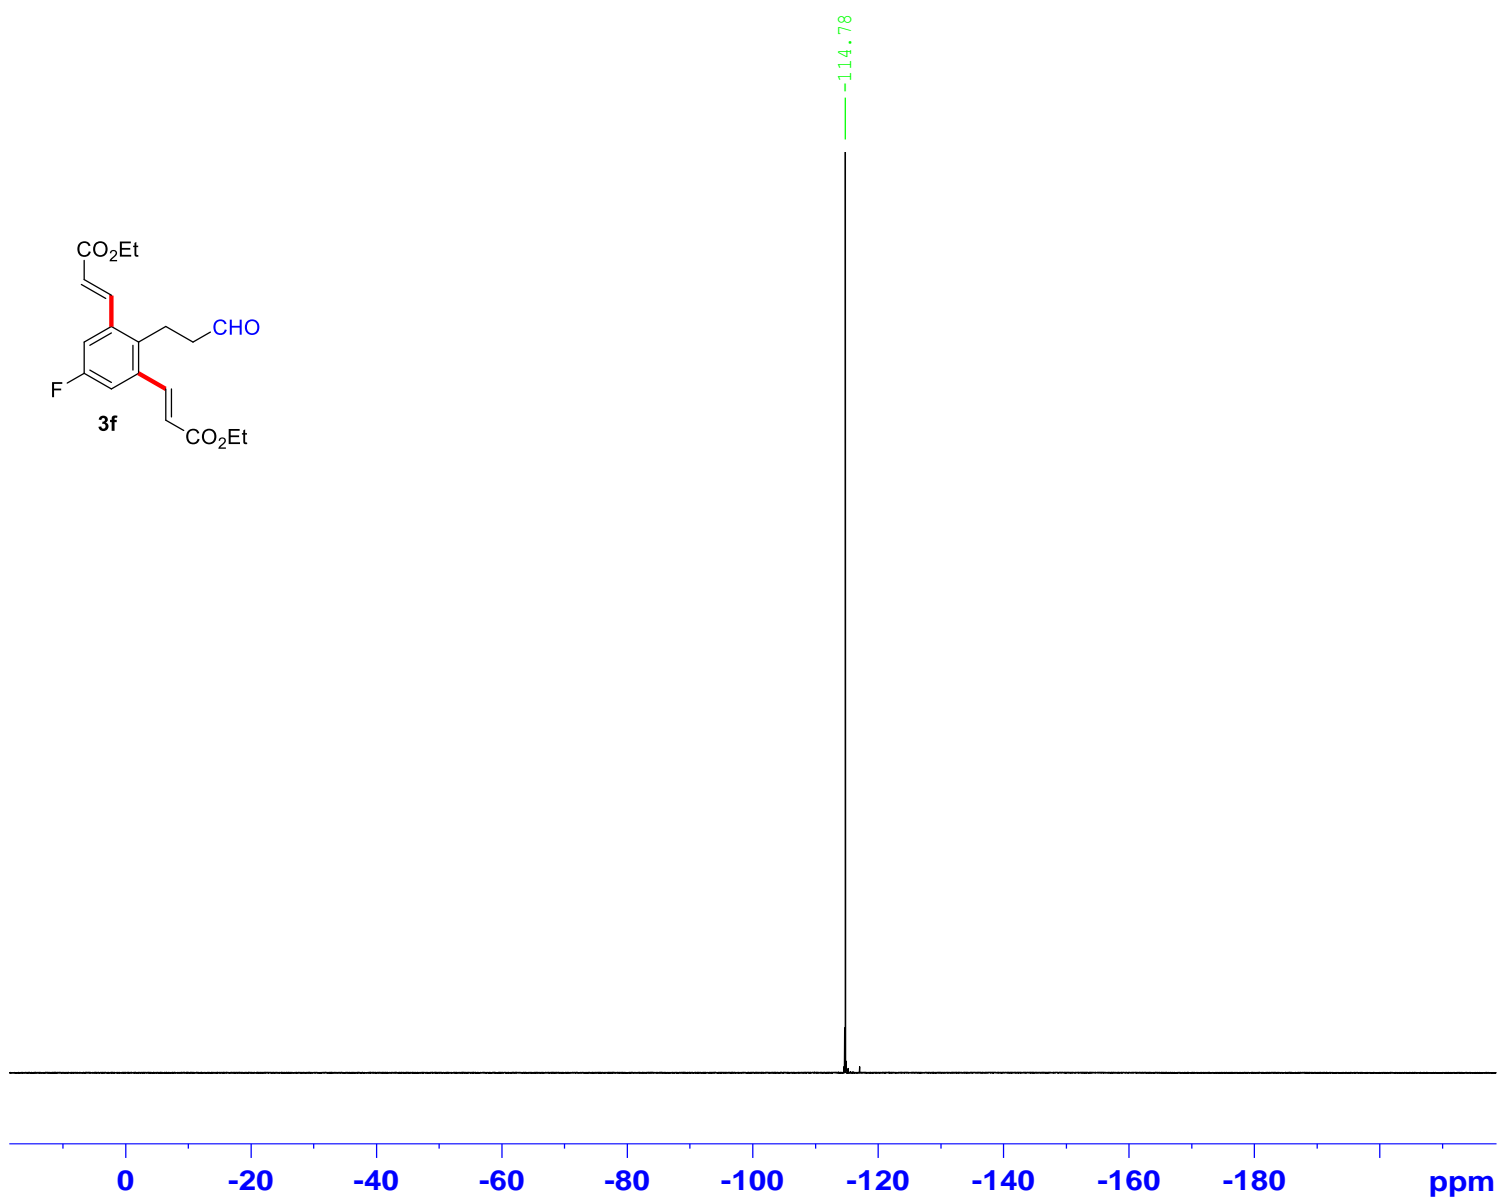

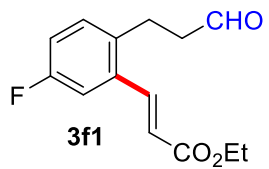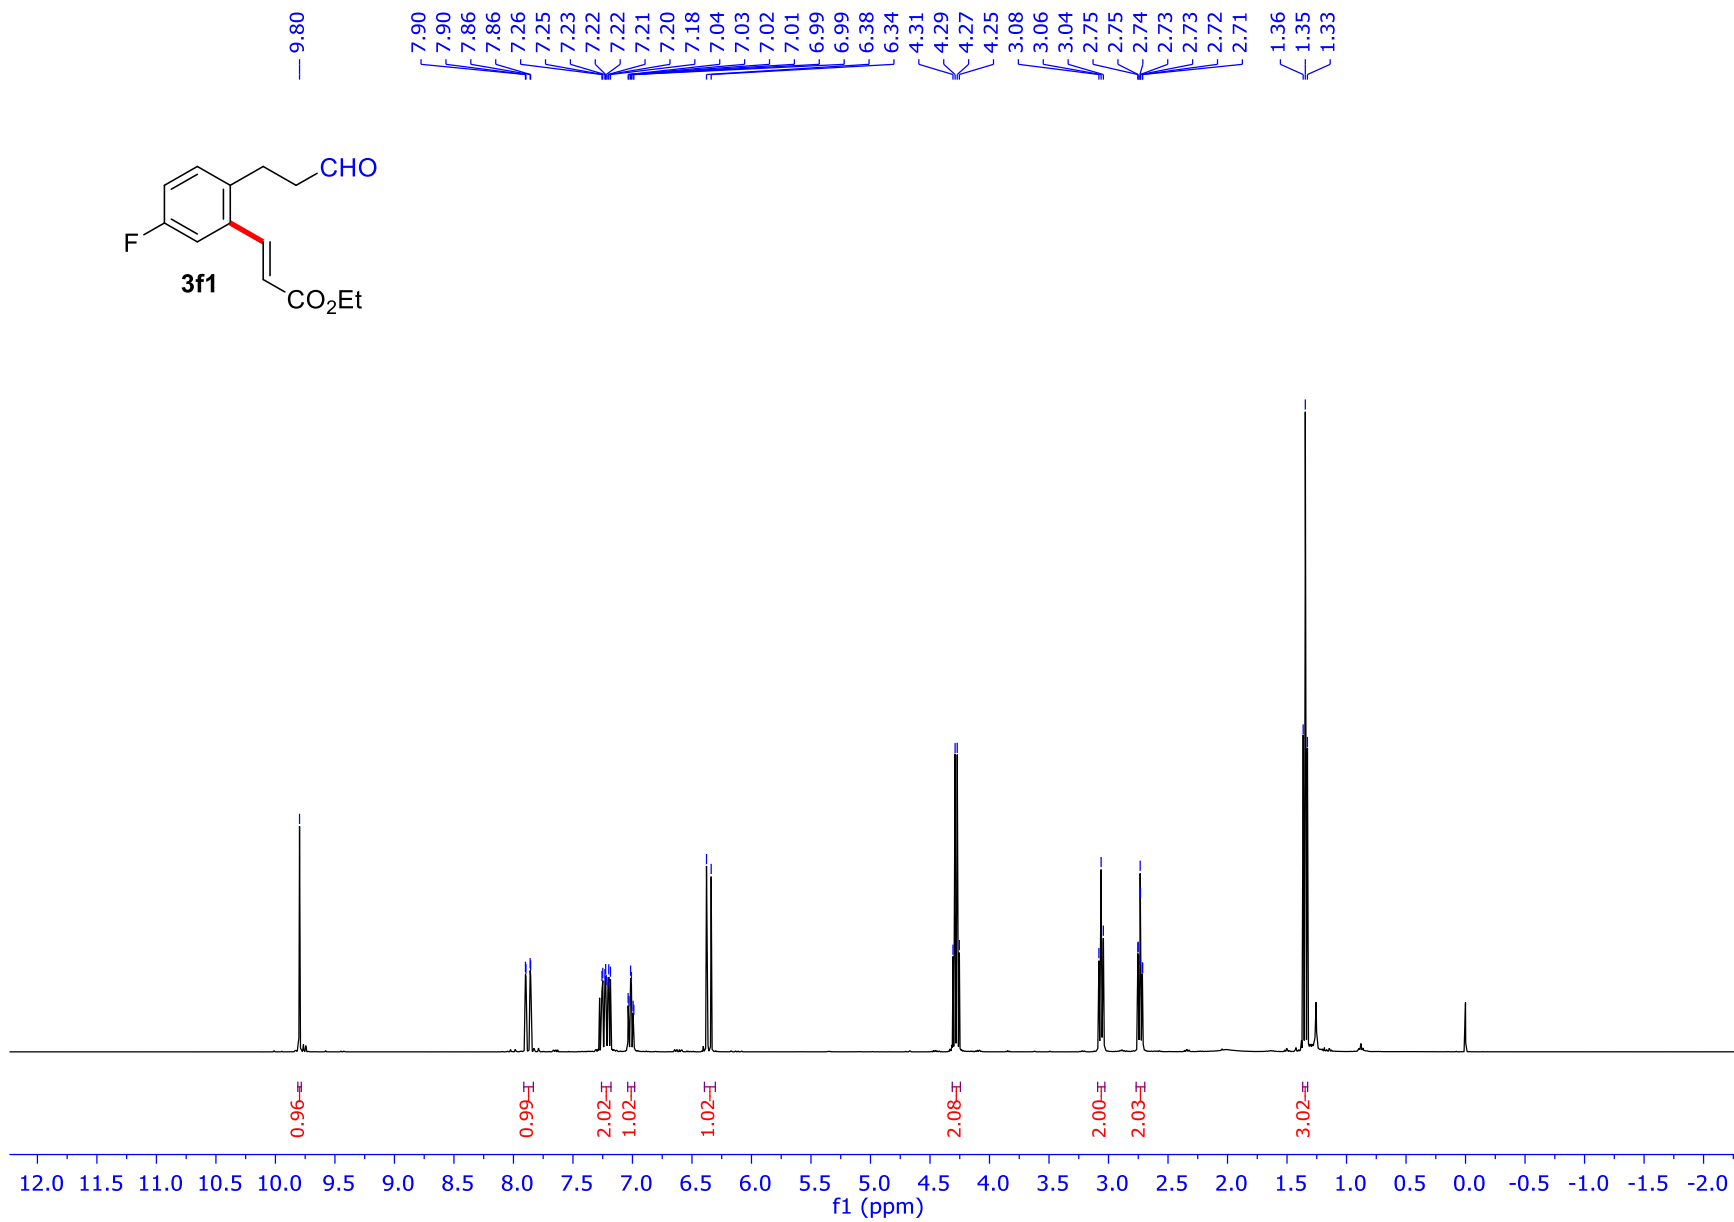

S250

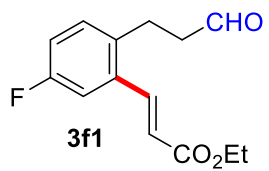

— 200.48

— 166.42

— 162.73

— 160.29

— 140.22

— 140.20

— 135.58

— 135.55

— 134.80

— 134.73

— 131.58

— 131.50

— 121.36

— 117.12

— 116.91

— 113.29

— 113.07

— 77.32

— 77.00

— 76.68

— 60.72

— 44.98

— 24.66

— 14.22

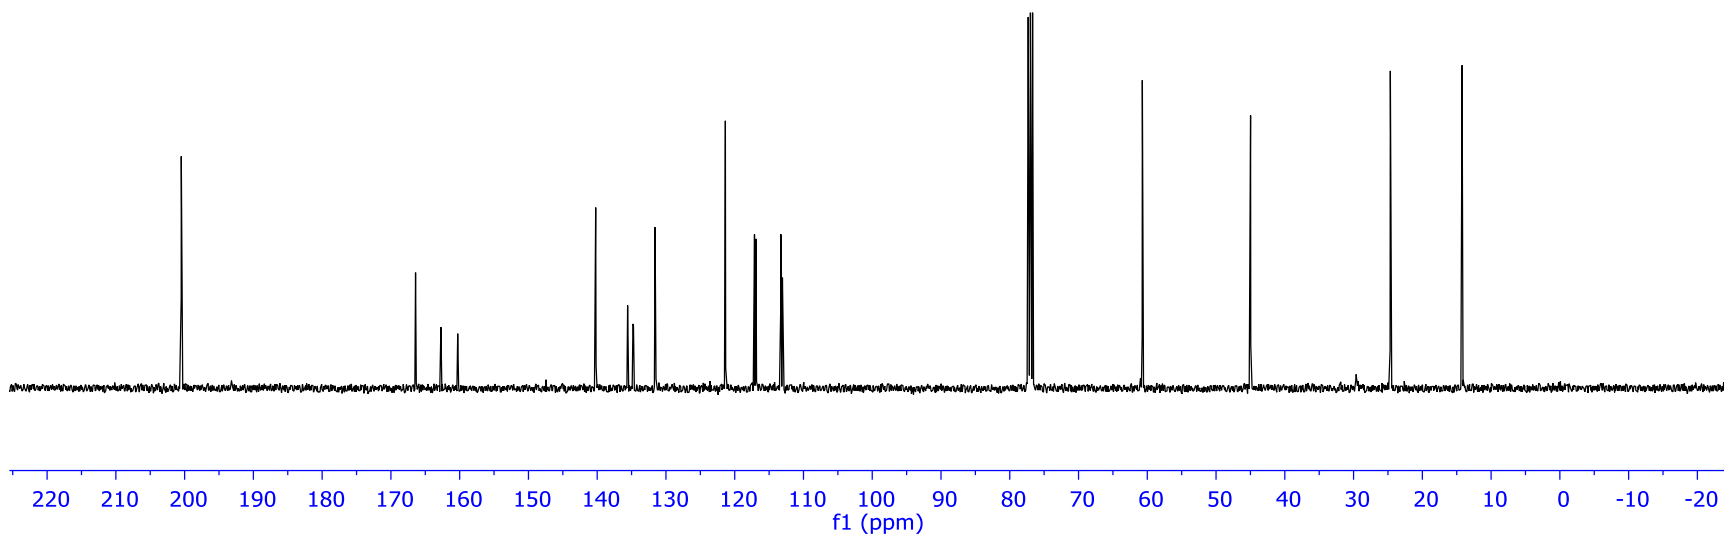

S251

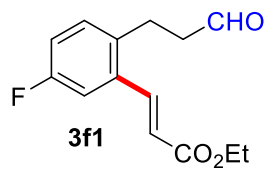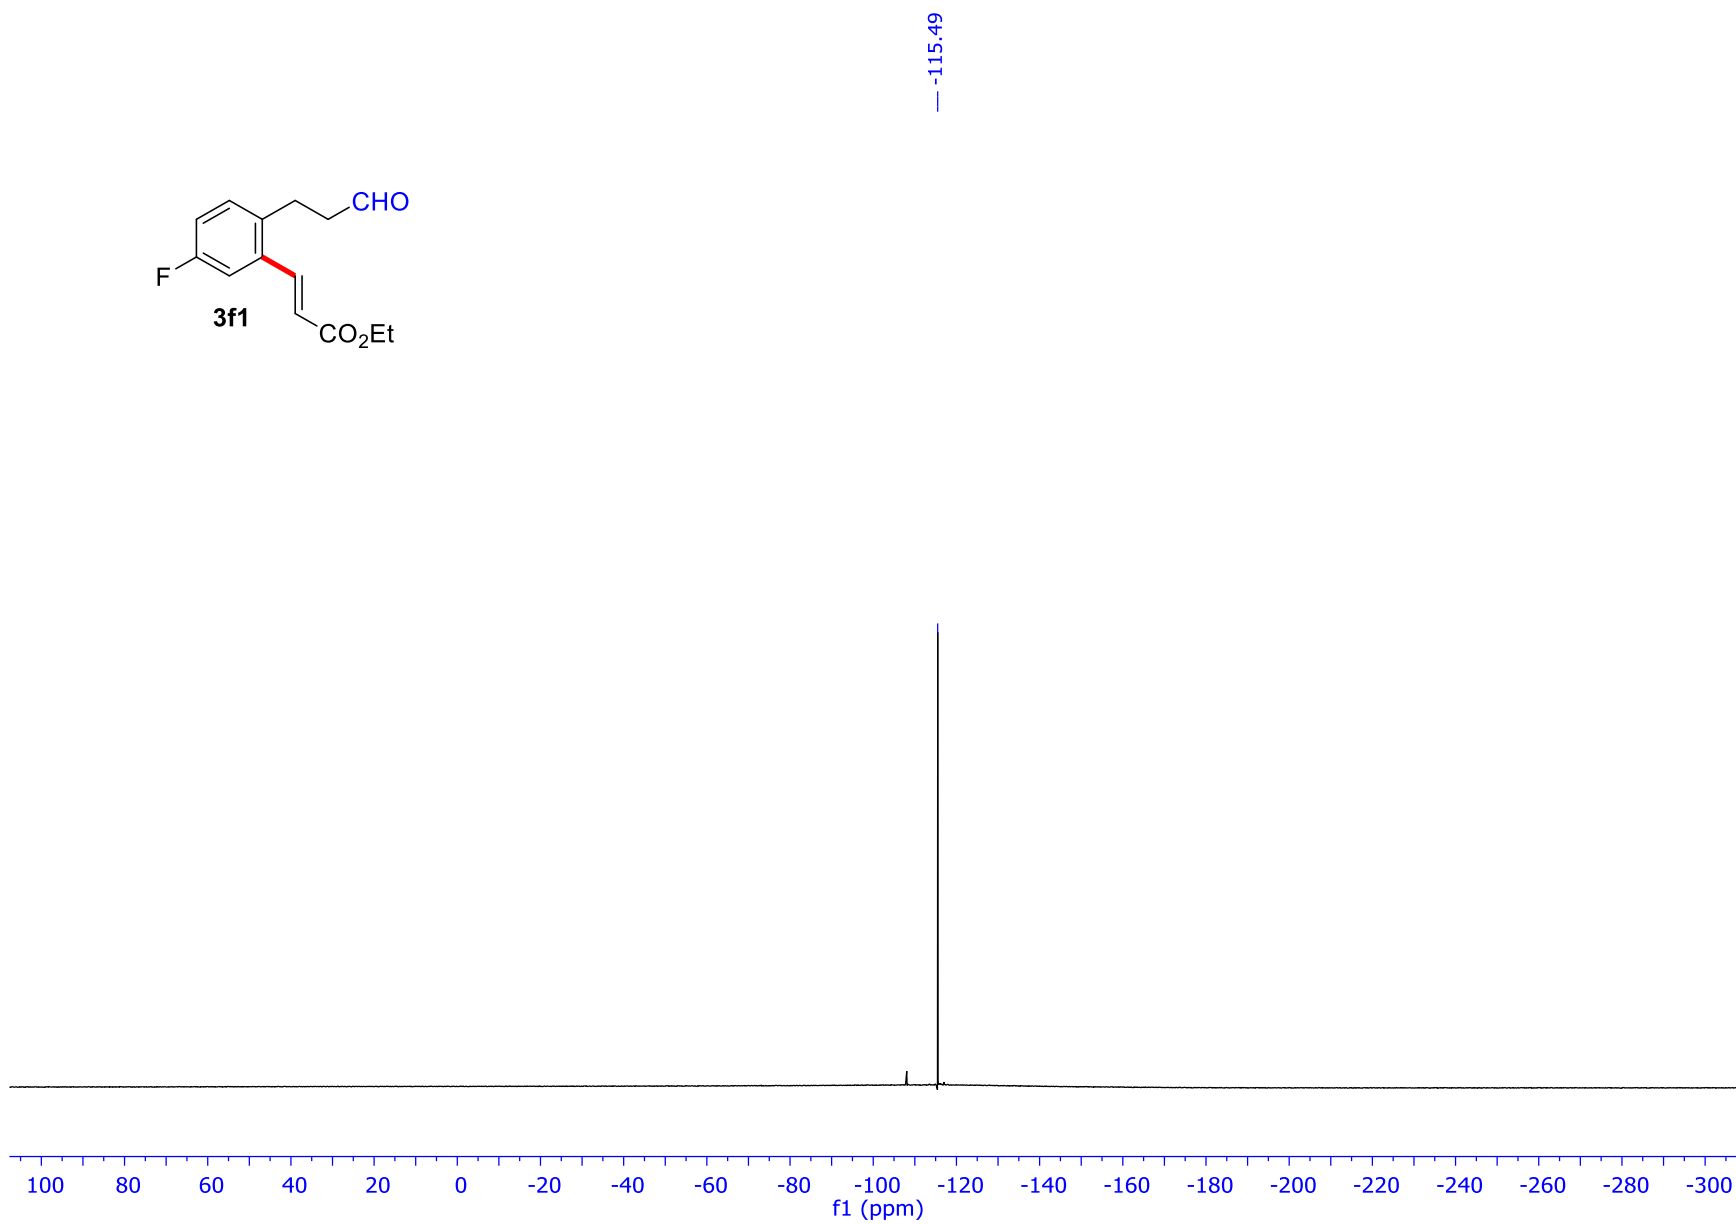

S252

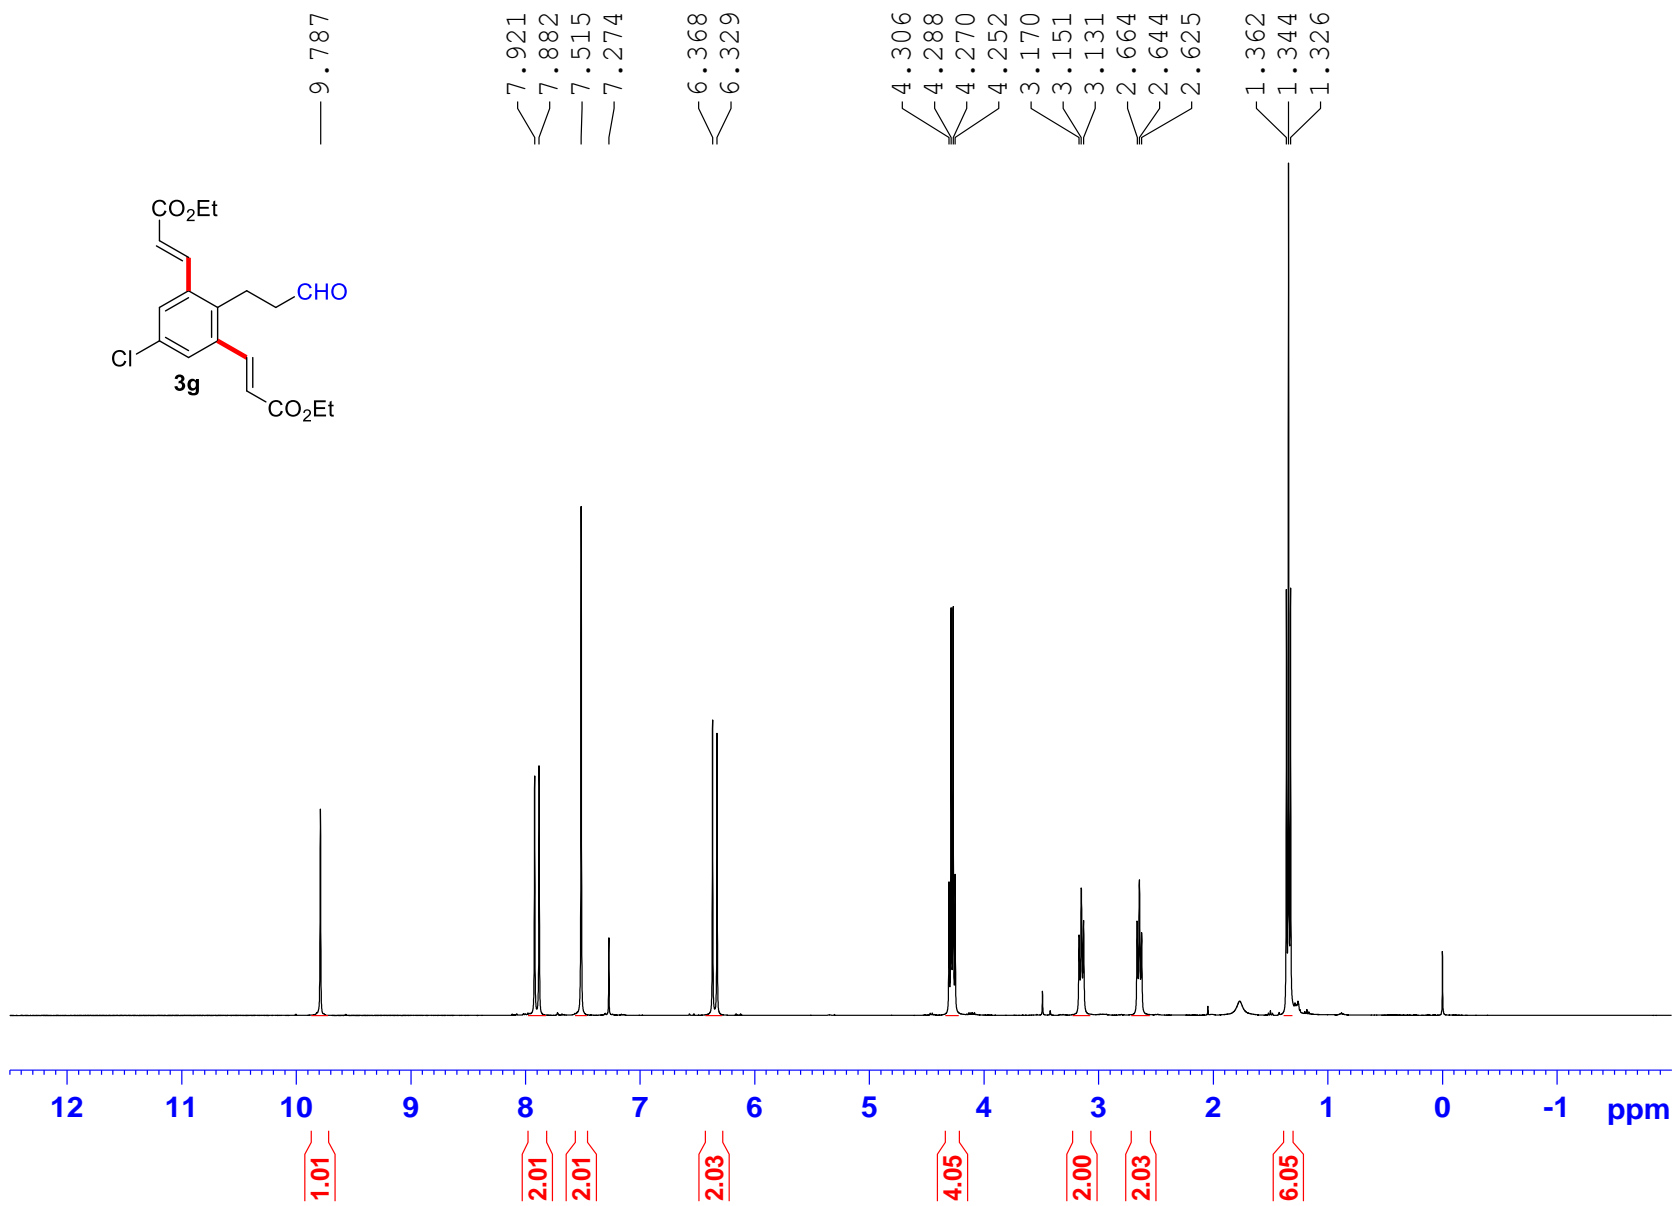

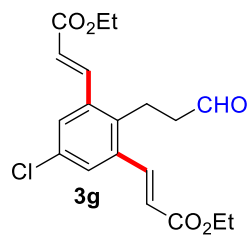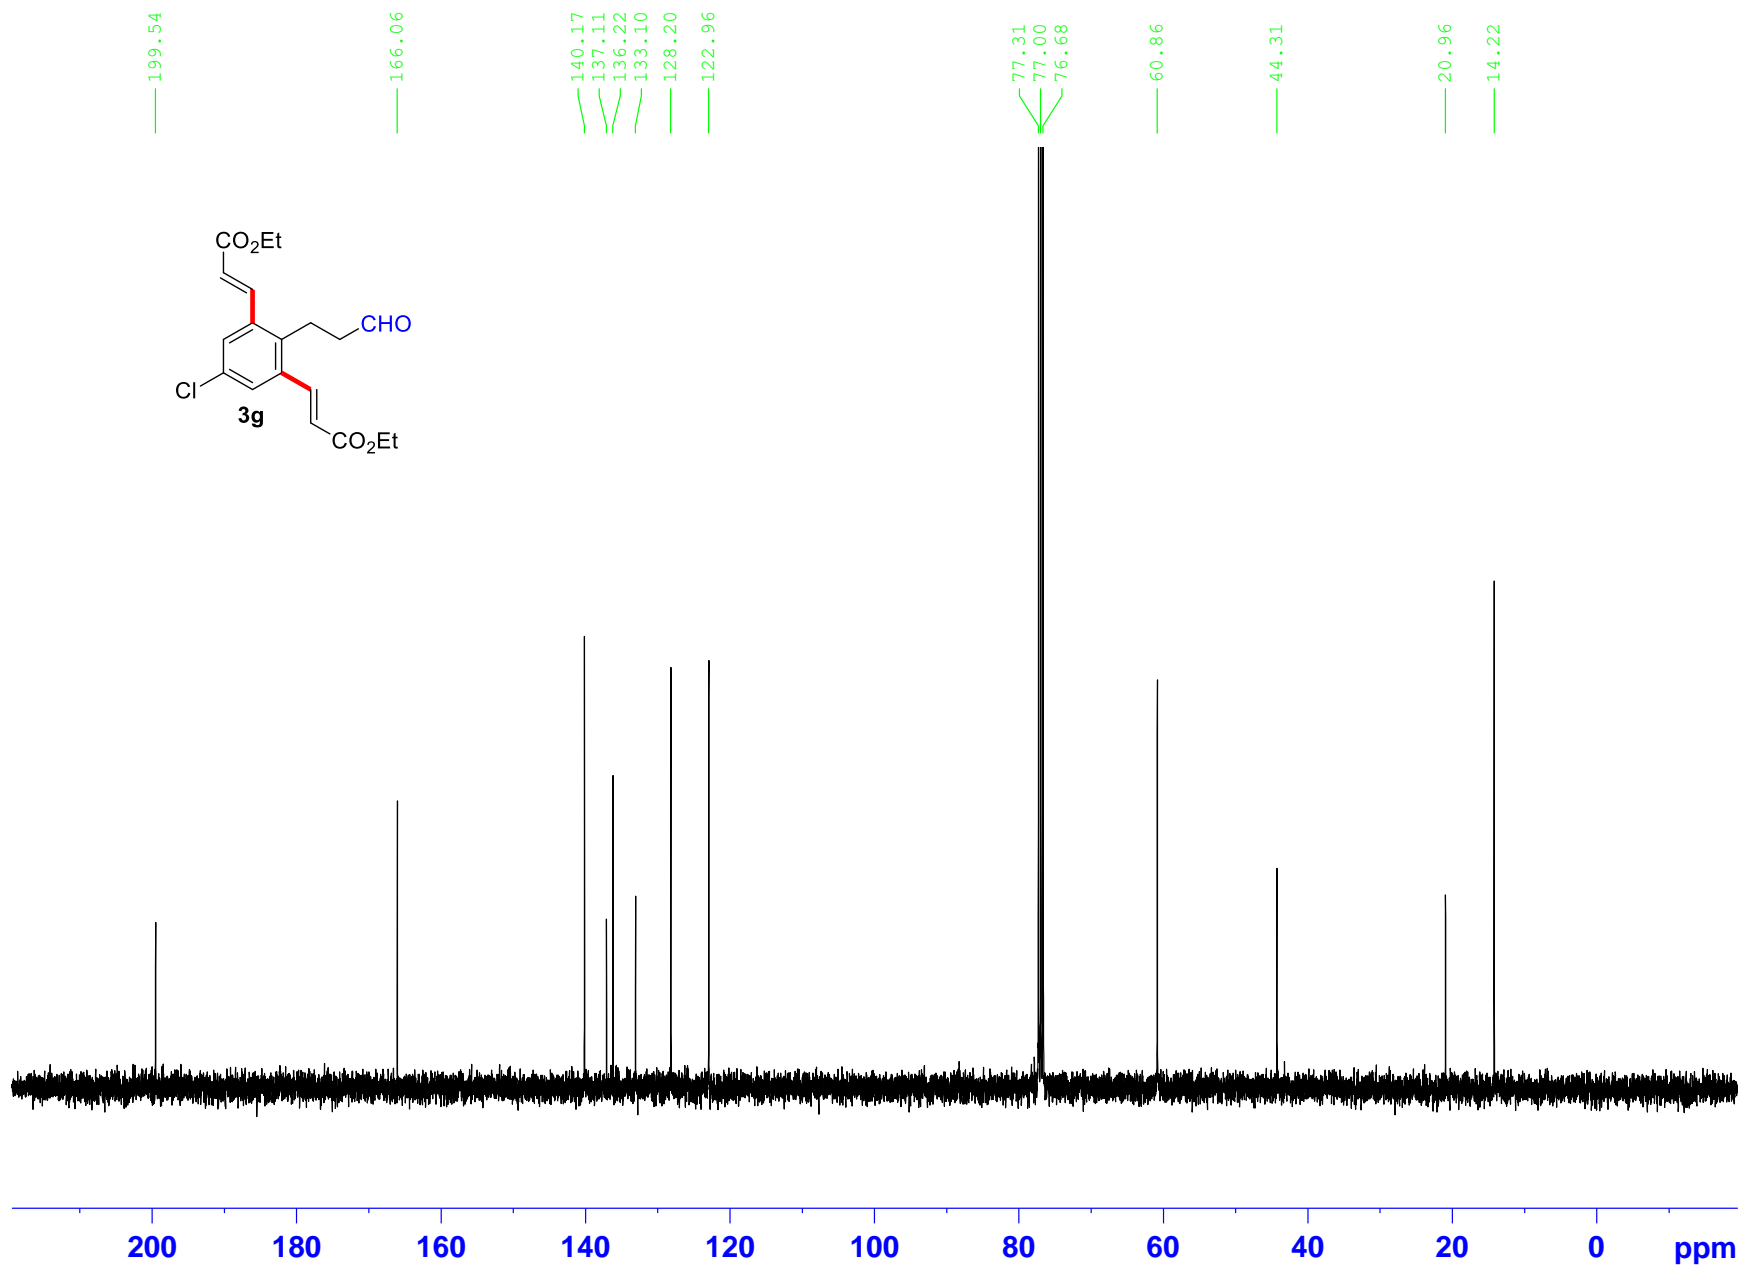

S254

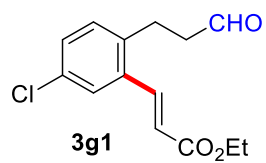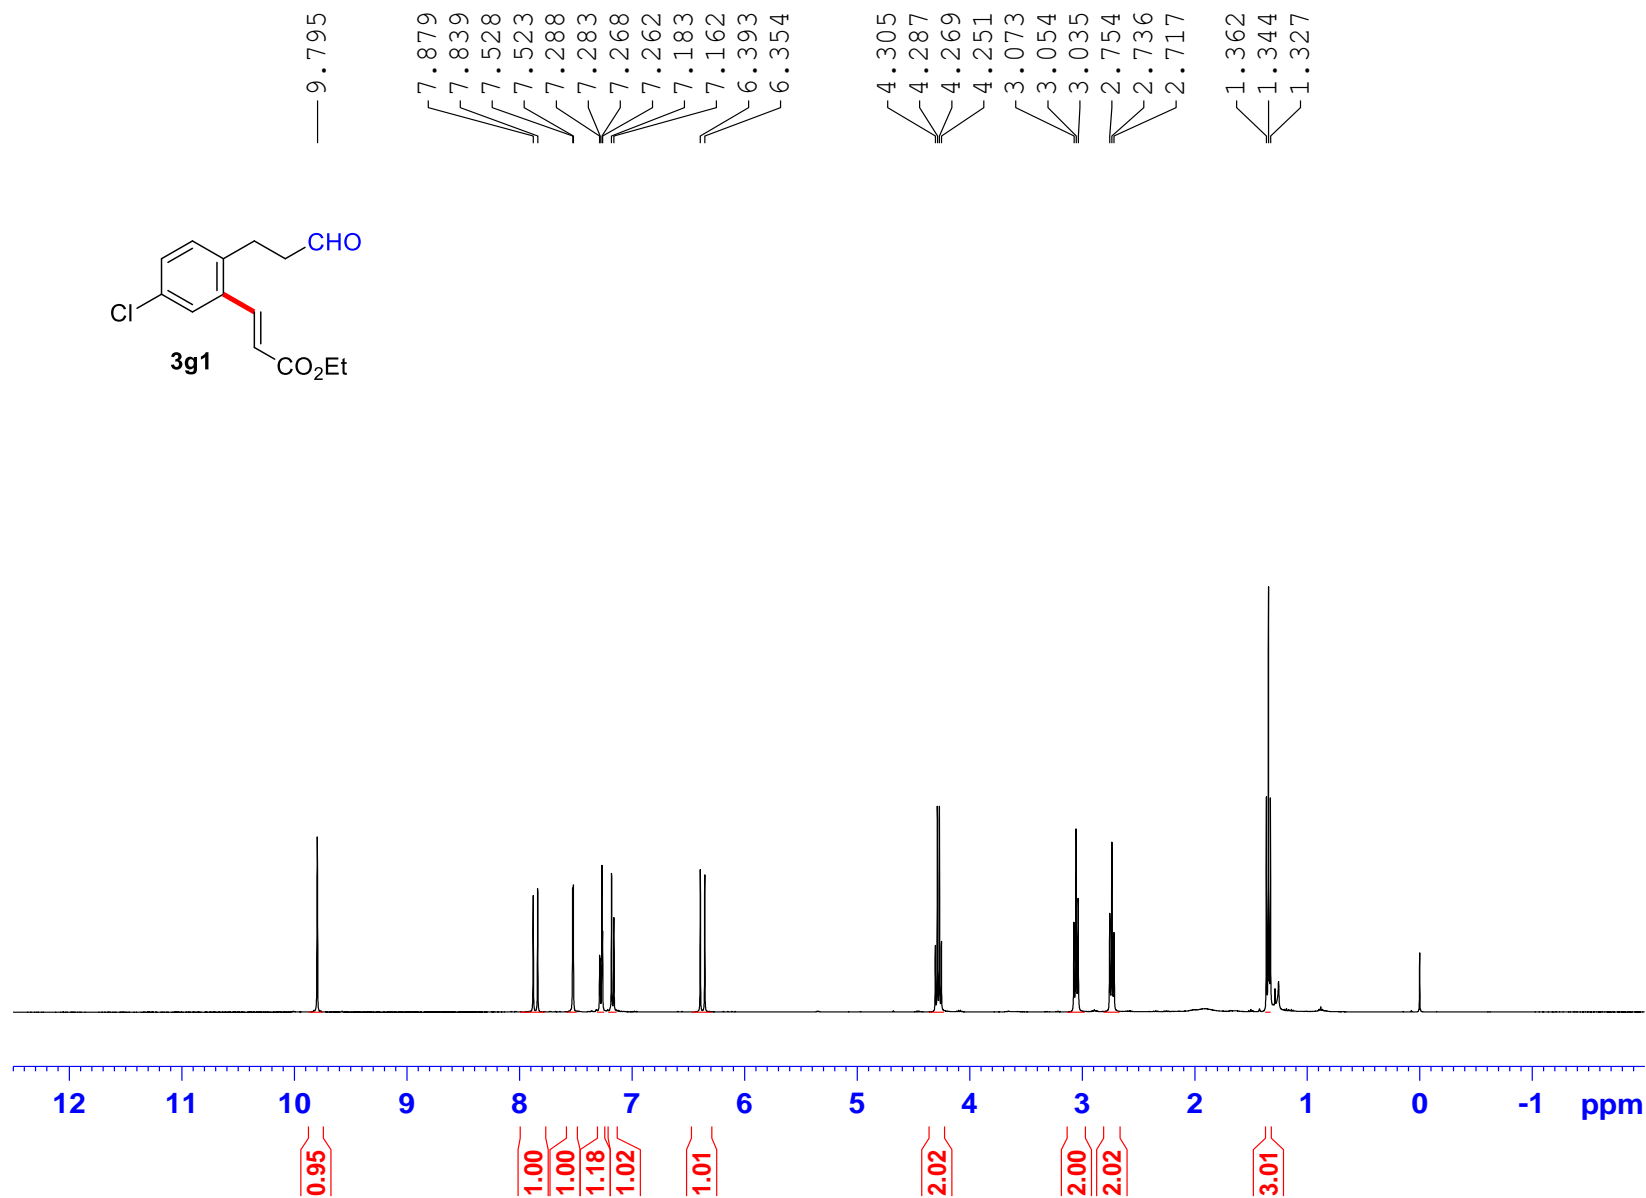

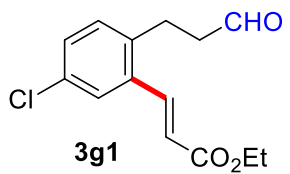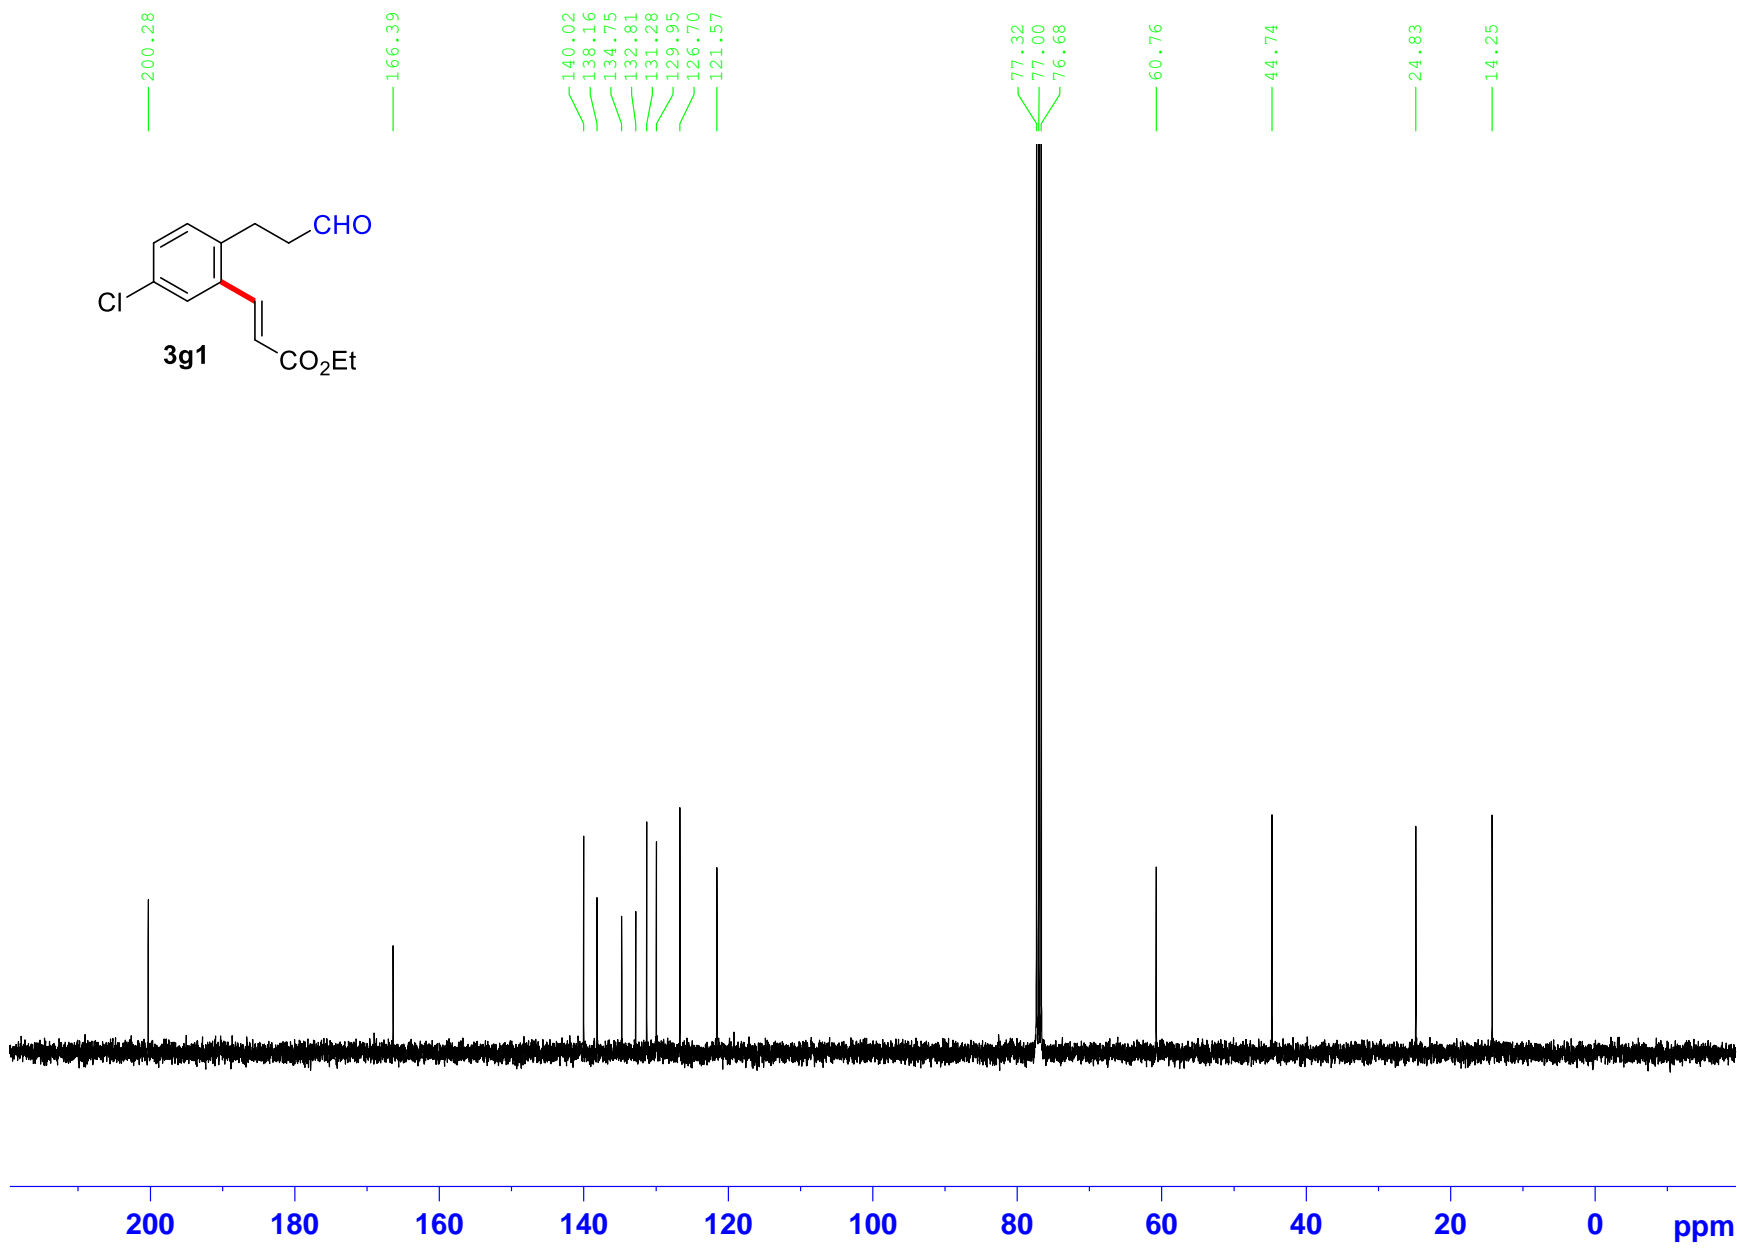



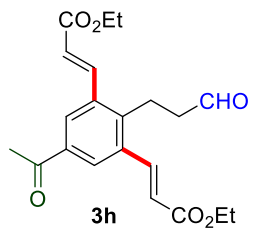

— 9.806

8.108  
8.005  
7.966

— 7.286

6.474  
6.435

4.325  
4.307  
4.289  
4.271  
3.259  
3.240  
3.220  
2.711  
2.690  
2.671  
2.643

1.380  
1.362  
1.344

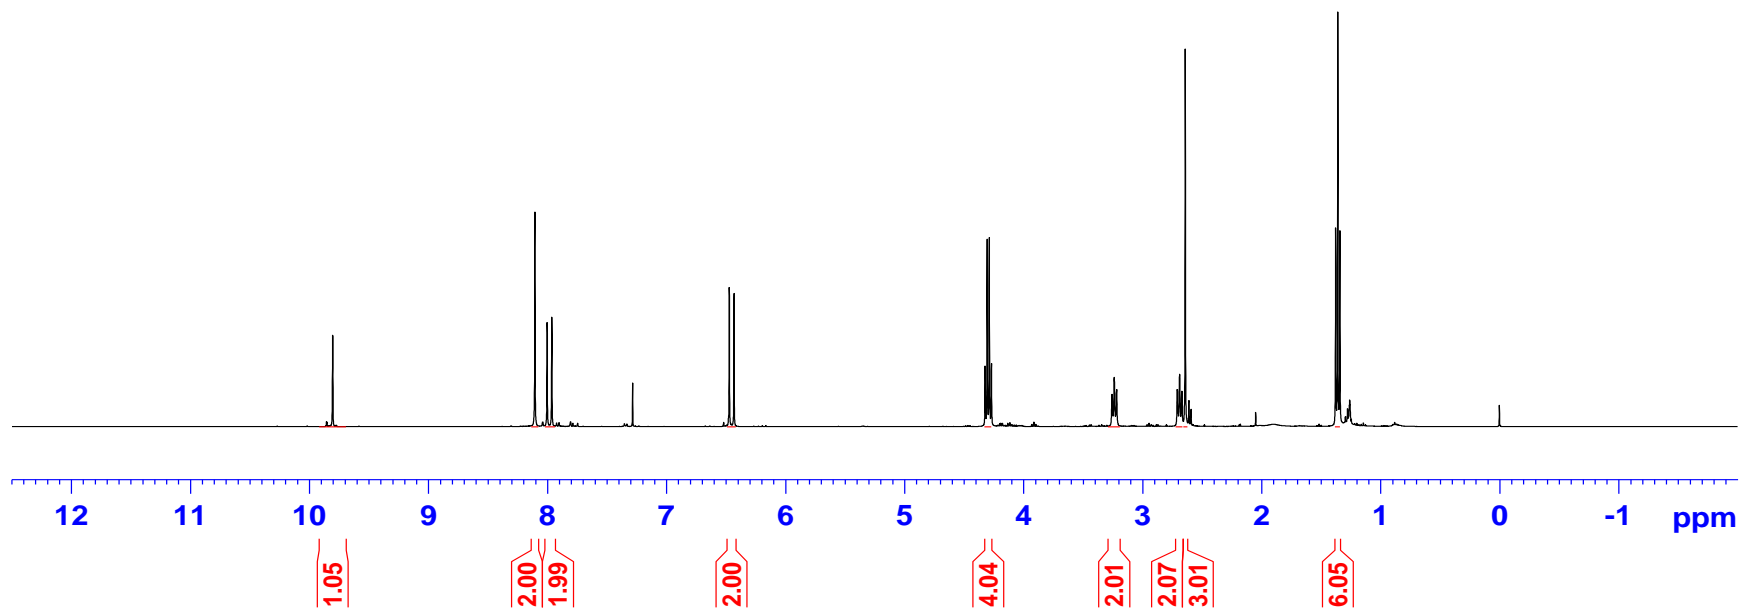

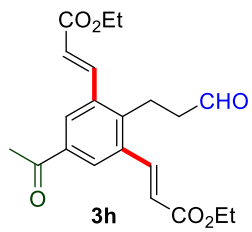

199.29  
196.64

166.10

143.50

140.63

135.89

135.14

128.05

123.08

77.32

77.00

76.68

60.86

43.94

26.52

21.59

14.22

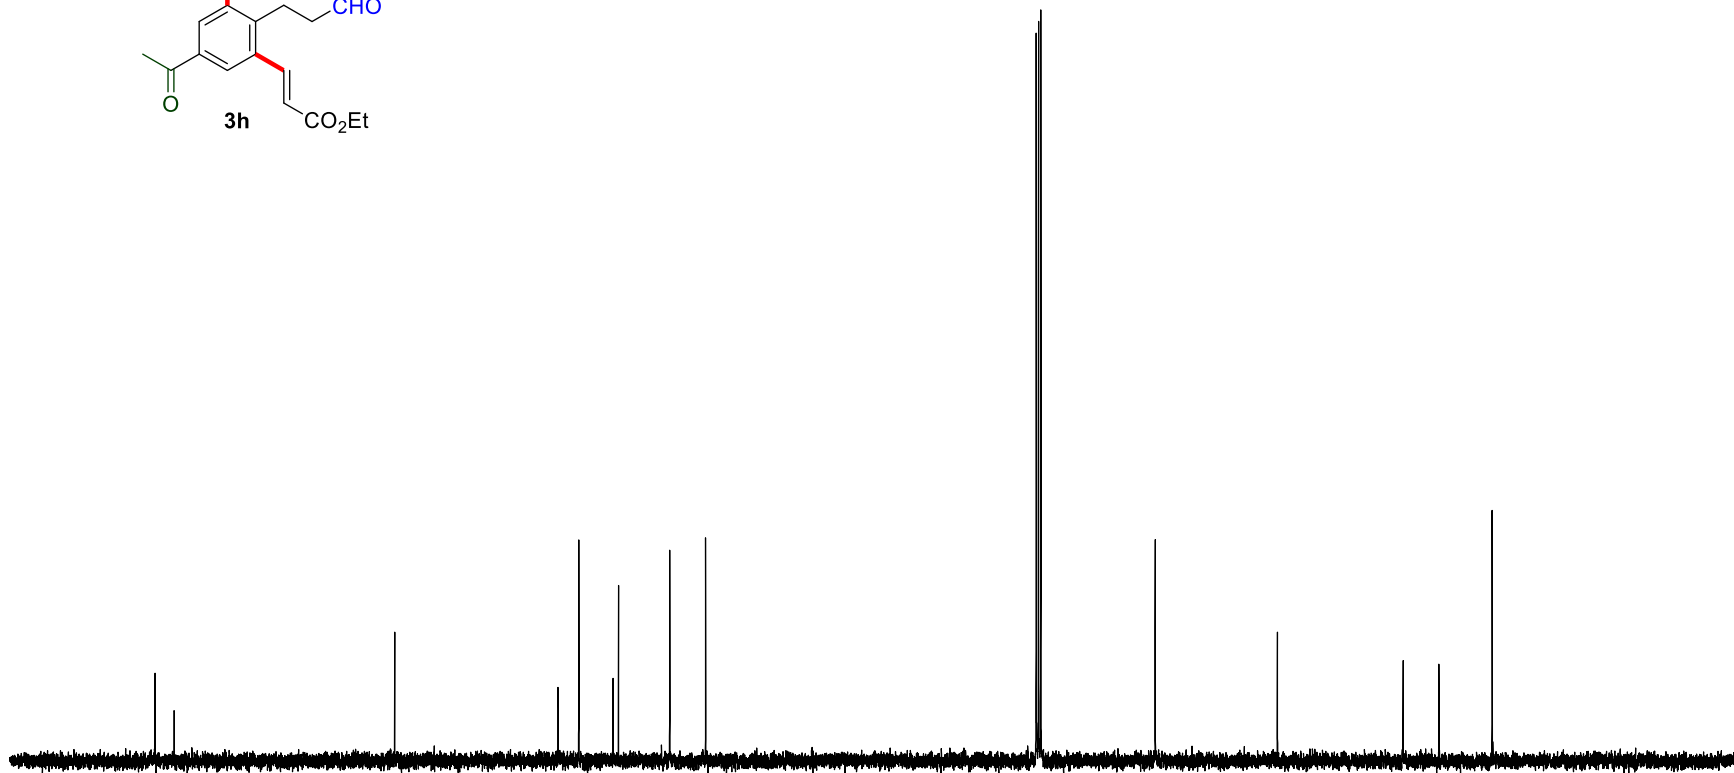

200

180

160

140

120

100

80

60

40

20

0

ppm

S258

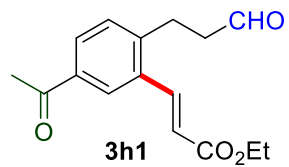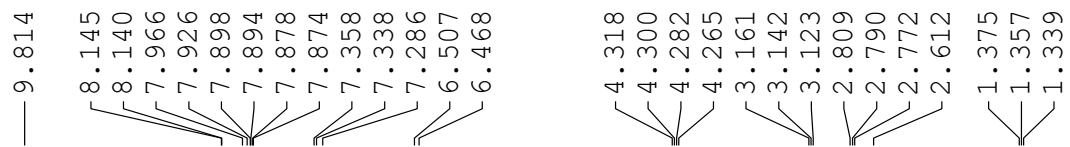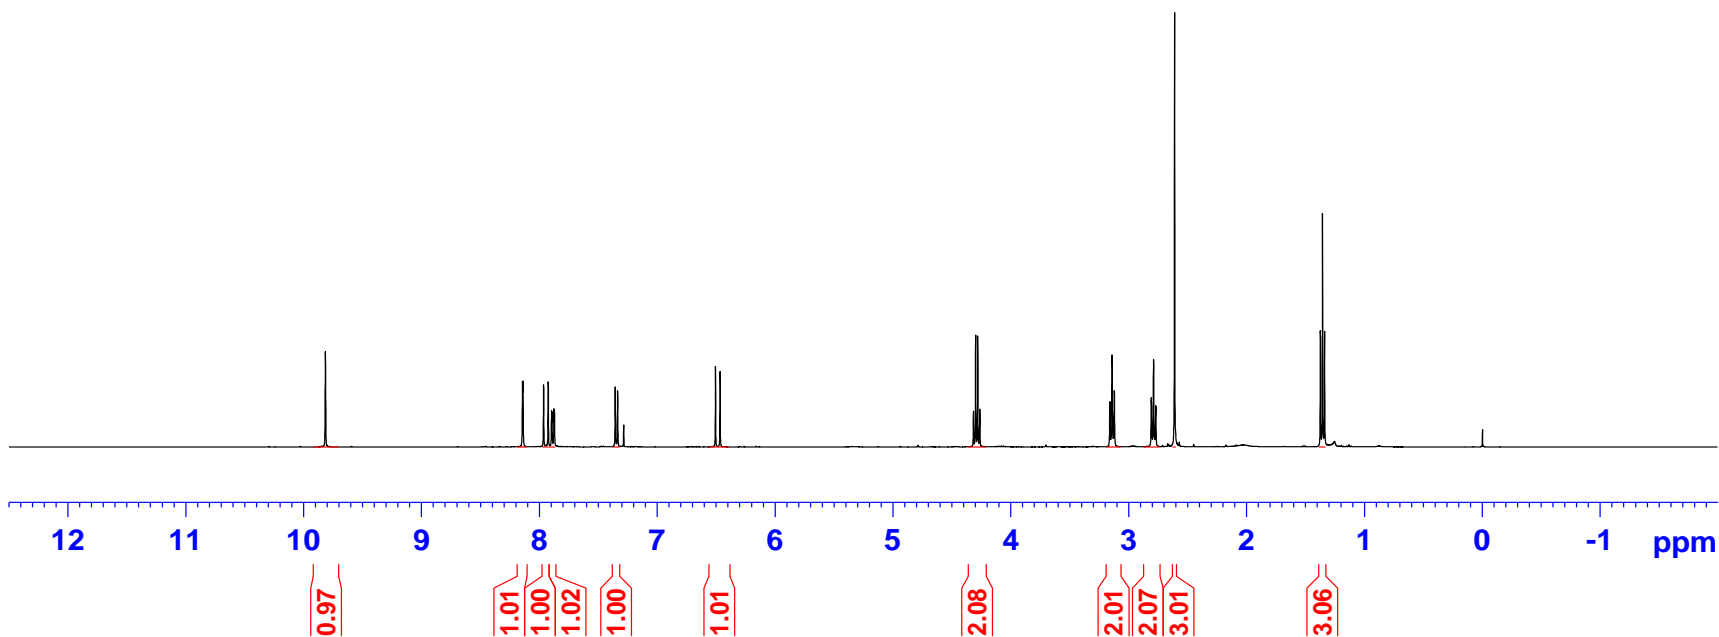

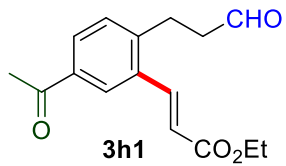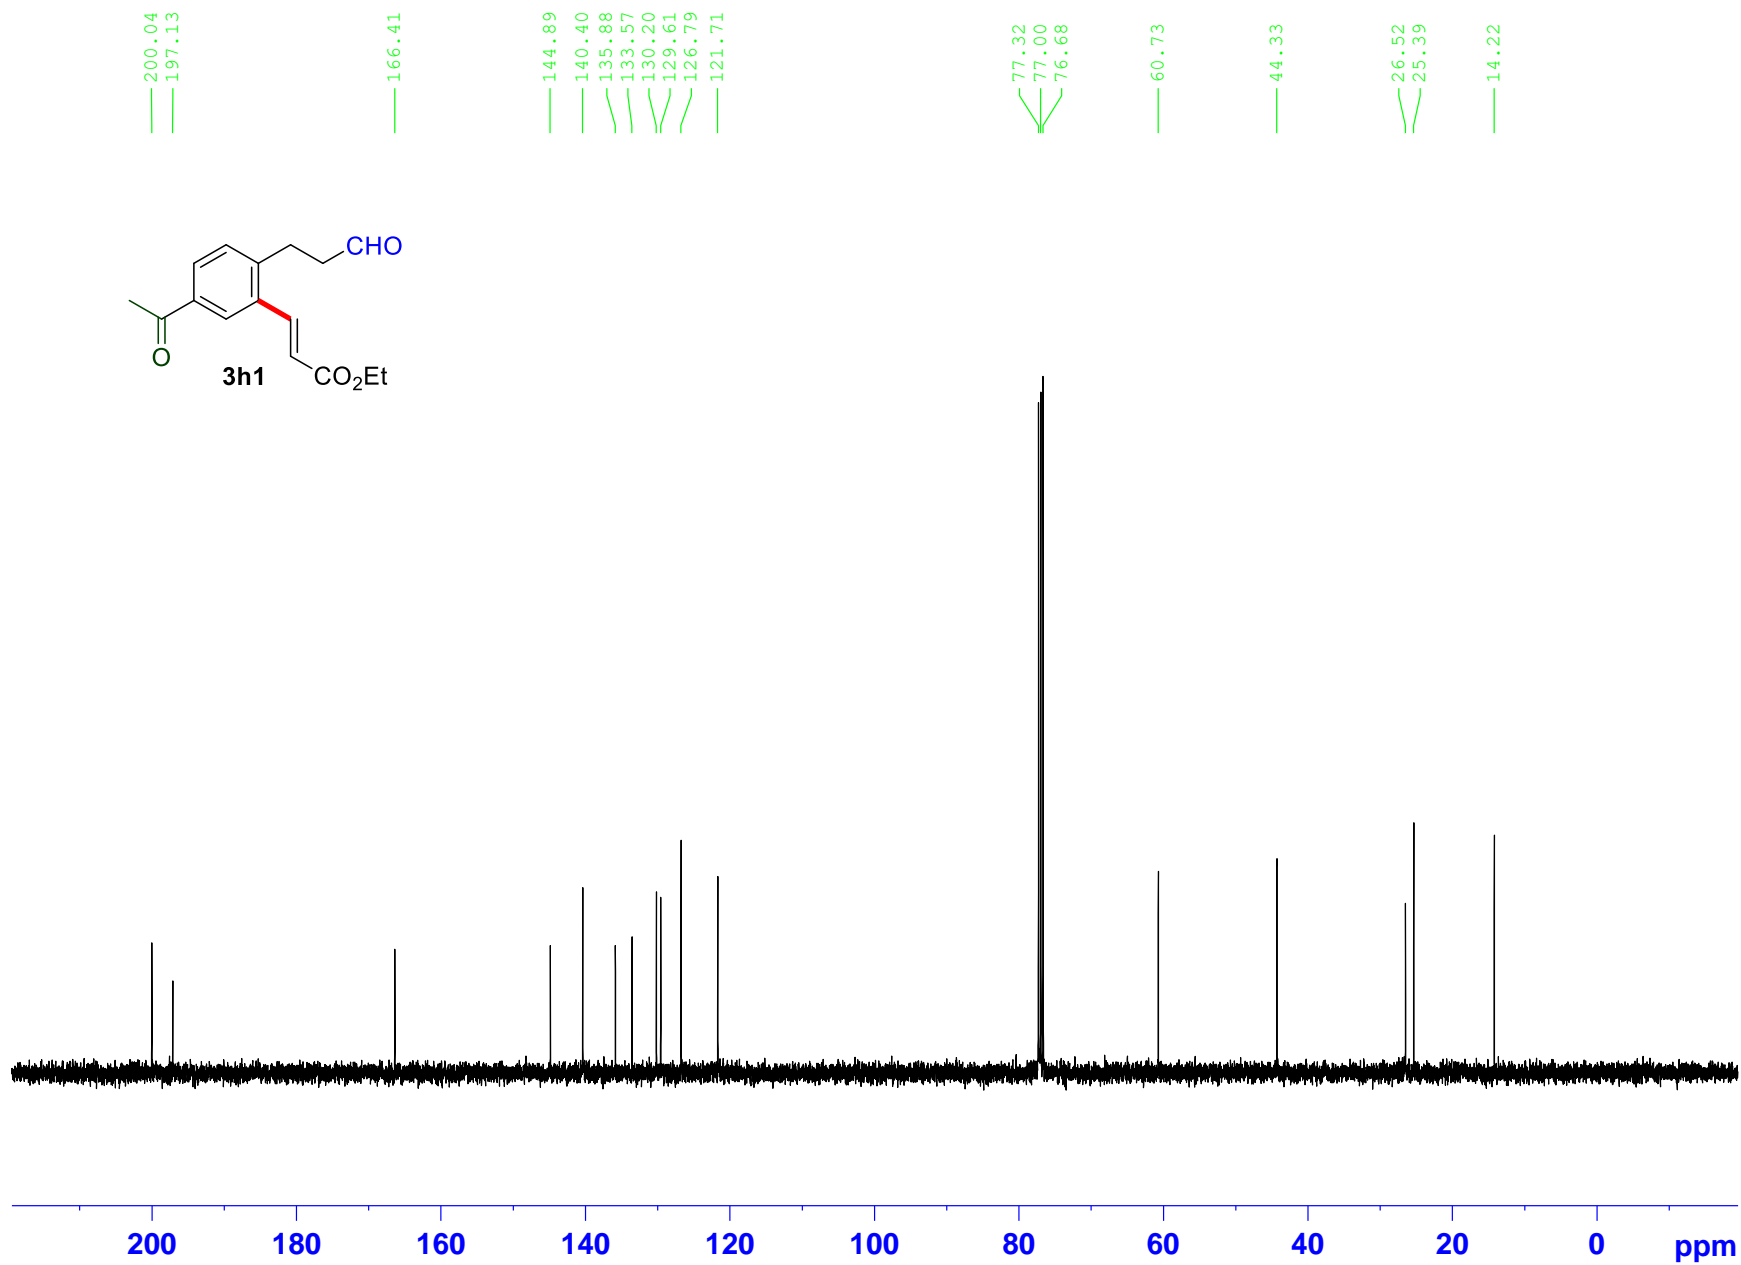

S260

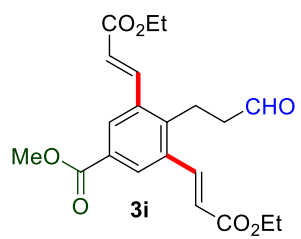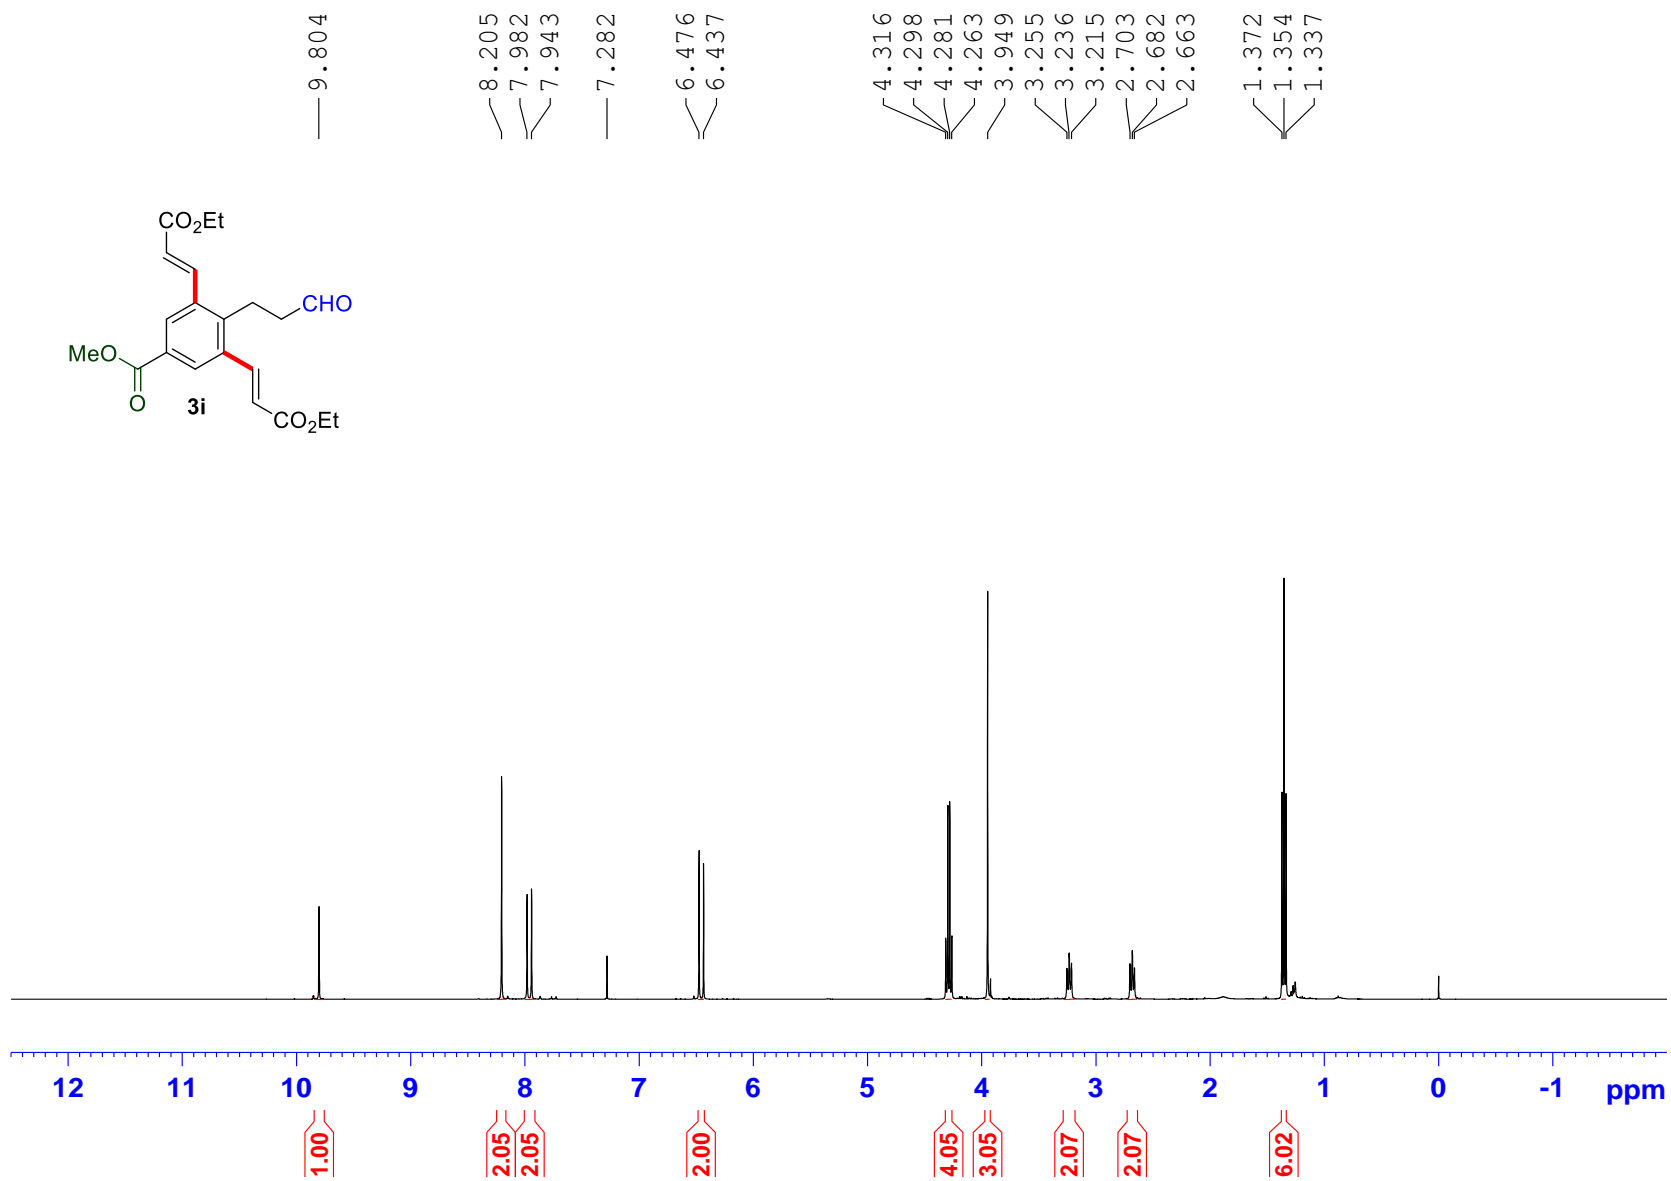

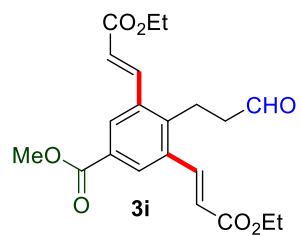

199.32

166.16  
165.87

143.32  
140.47

134.94

129.30  
129.18

122.98

77.32  
77.00  
76.68

60.81

52.40

44.00

21.50

14.22

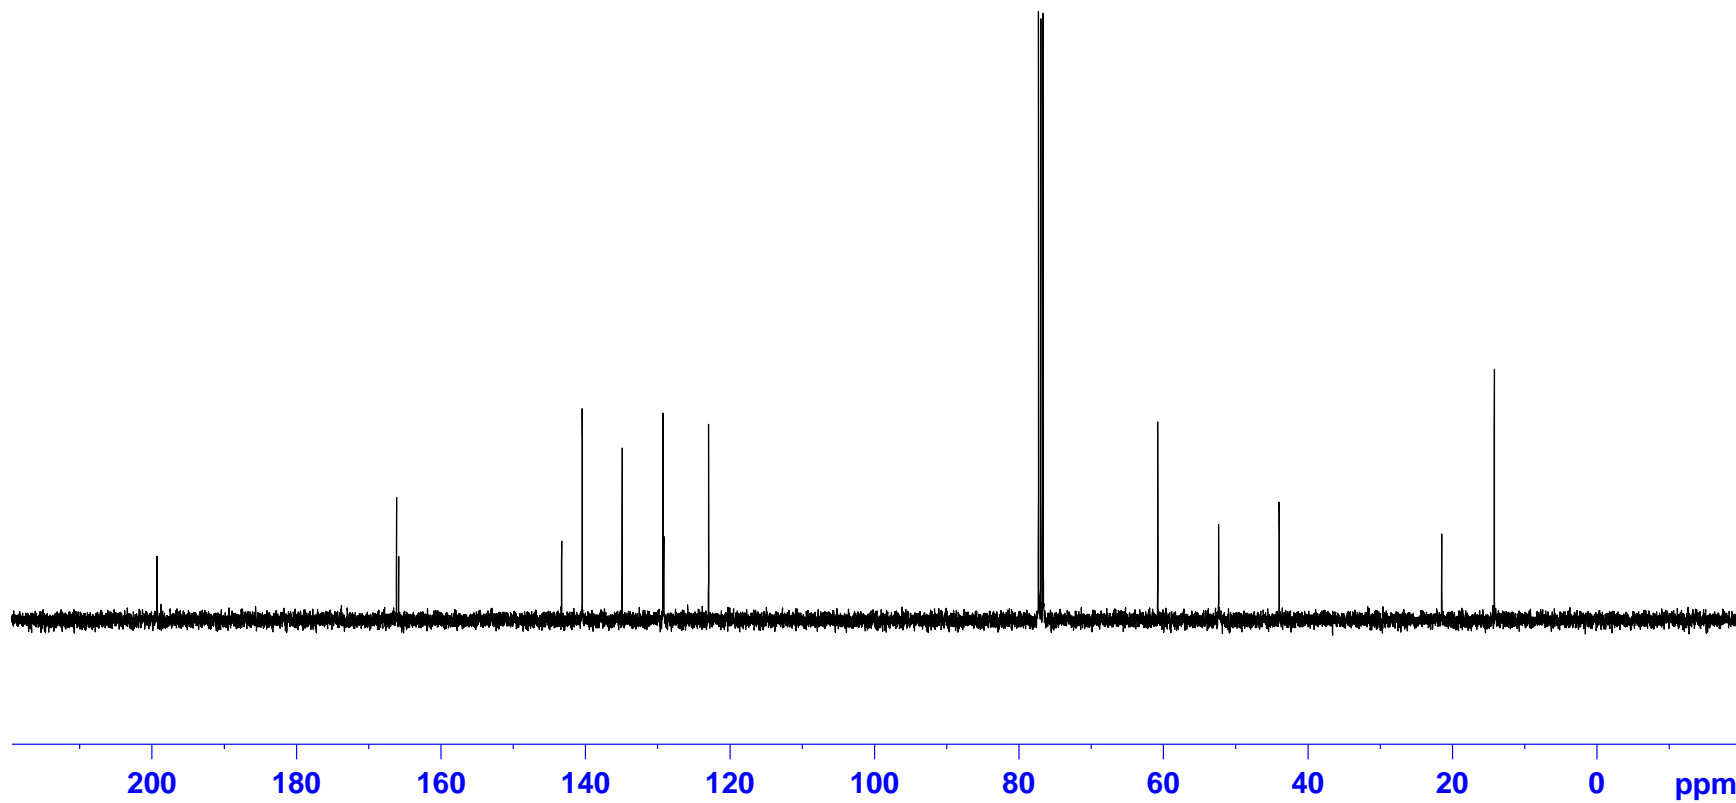

S262

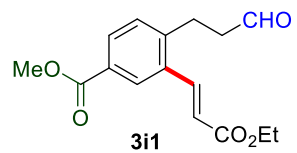

— 9.820

8.245  
 8.242  
 7.979  
 7.975  
 7.958  
 7.918  
 7.333  
 7.313  
 7.285  
 6.517  
 6.477

4.322  
 4.304  
 4.286  
 4.268  
 3.933  
 3.163  
 3.144  
 3.125  
 2.807  
 2.788  
 2.770  
 1.379  
 1.361  
 1.343

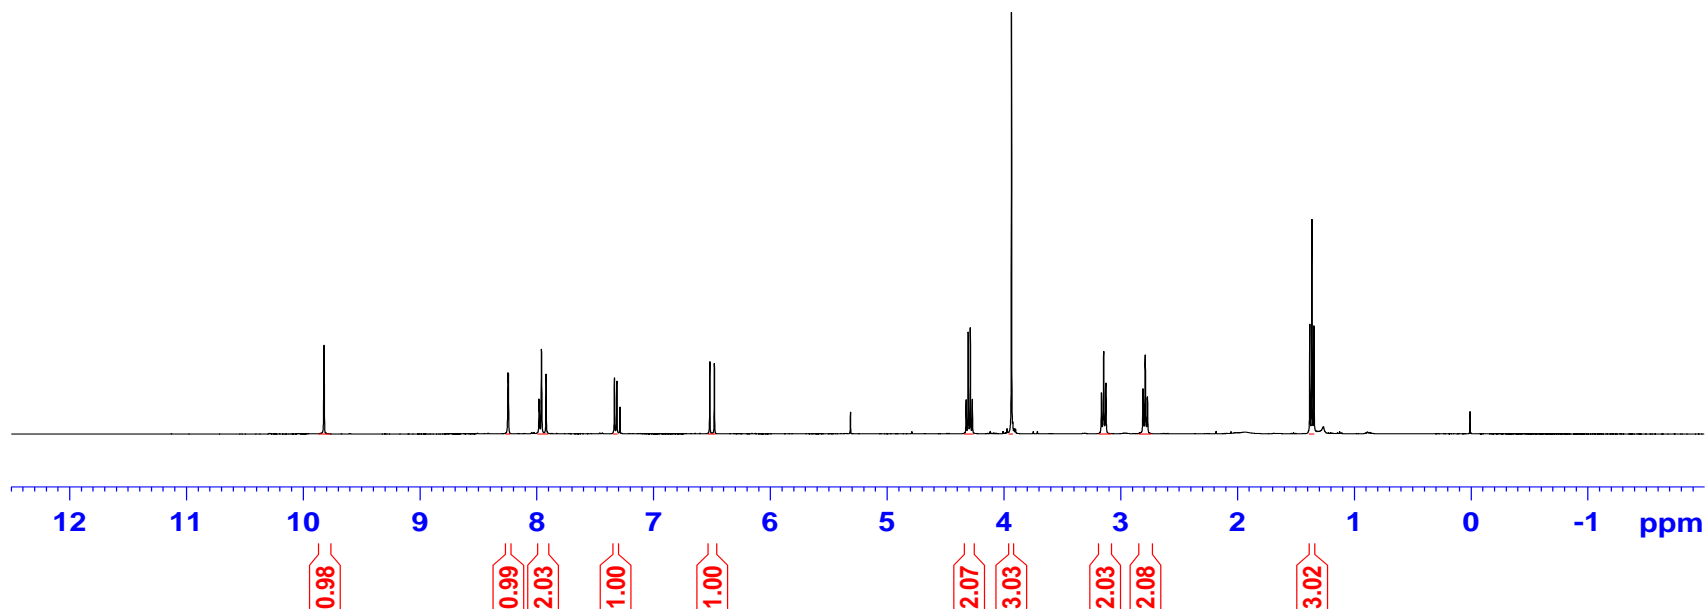

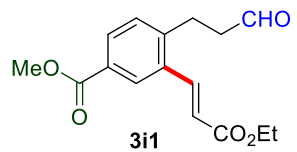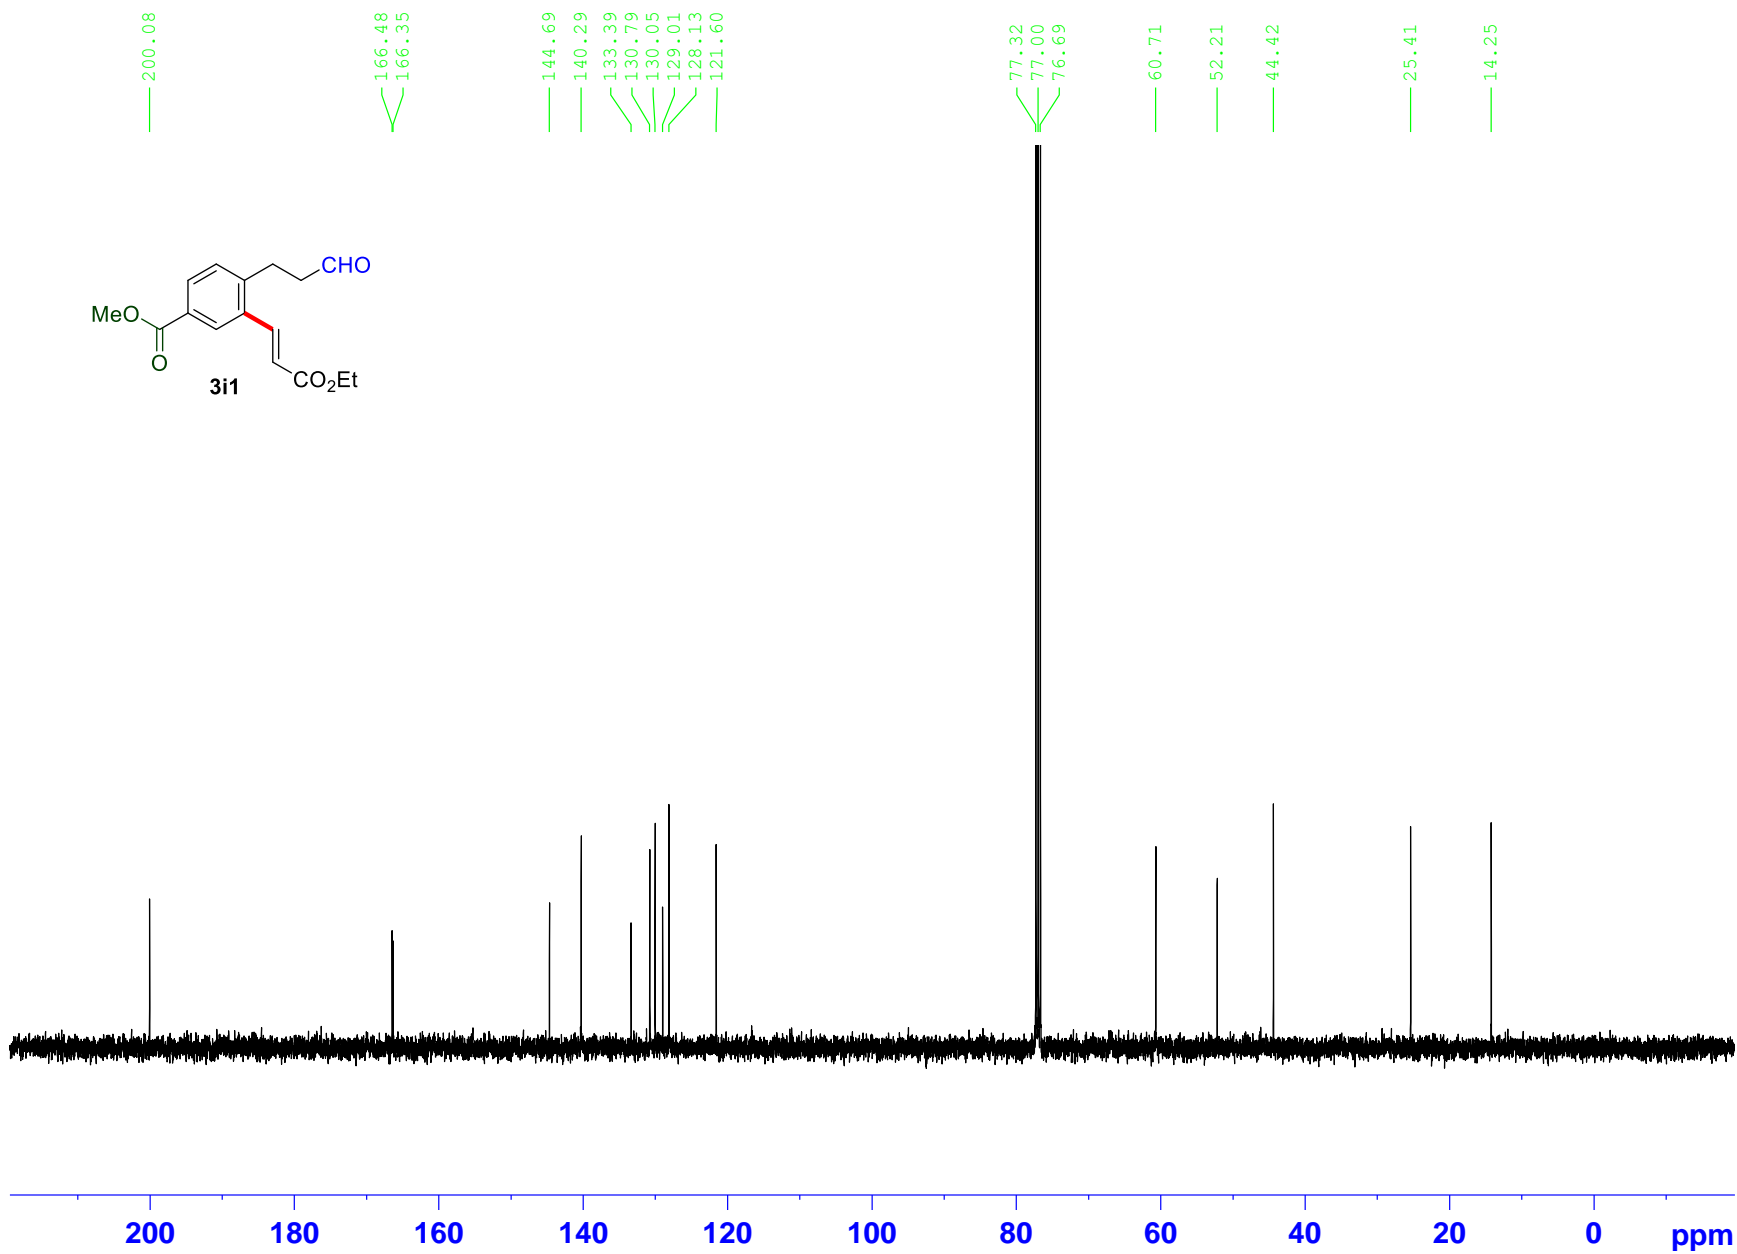

S264



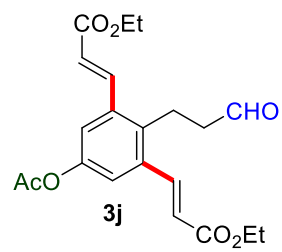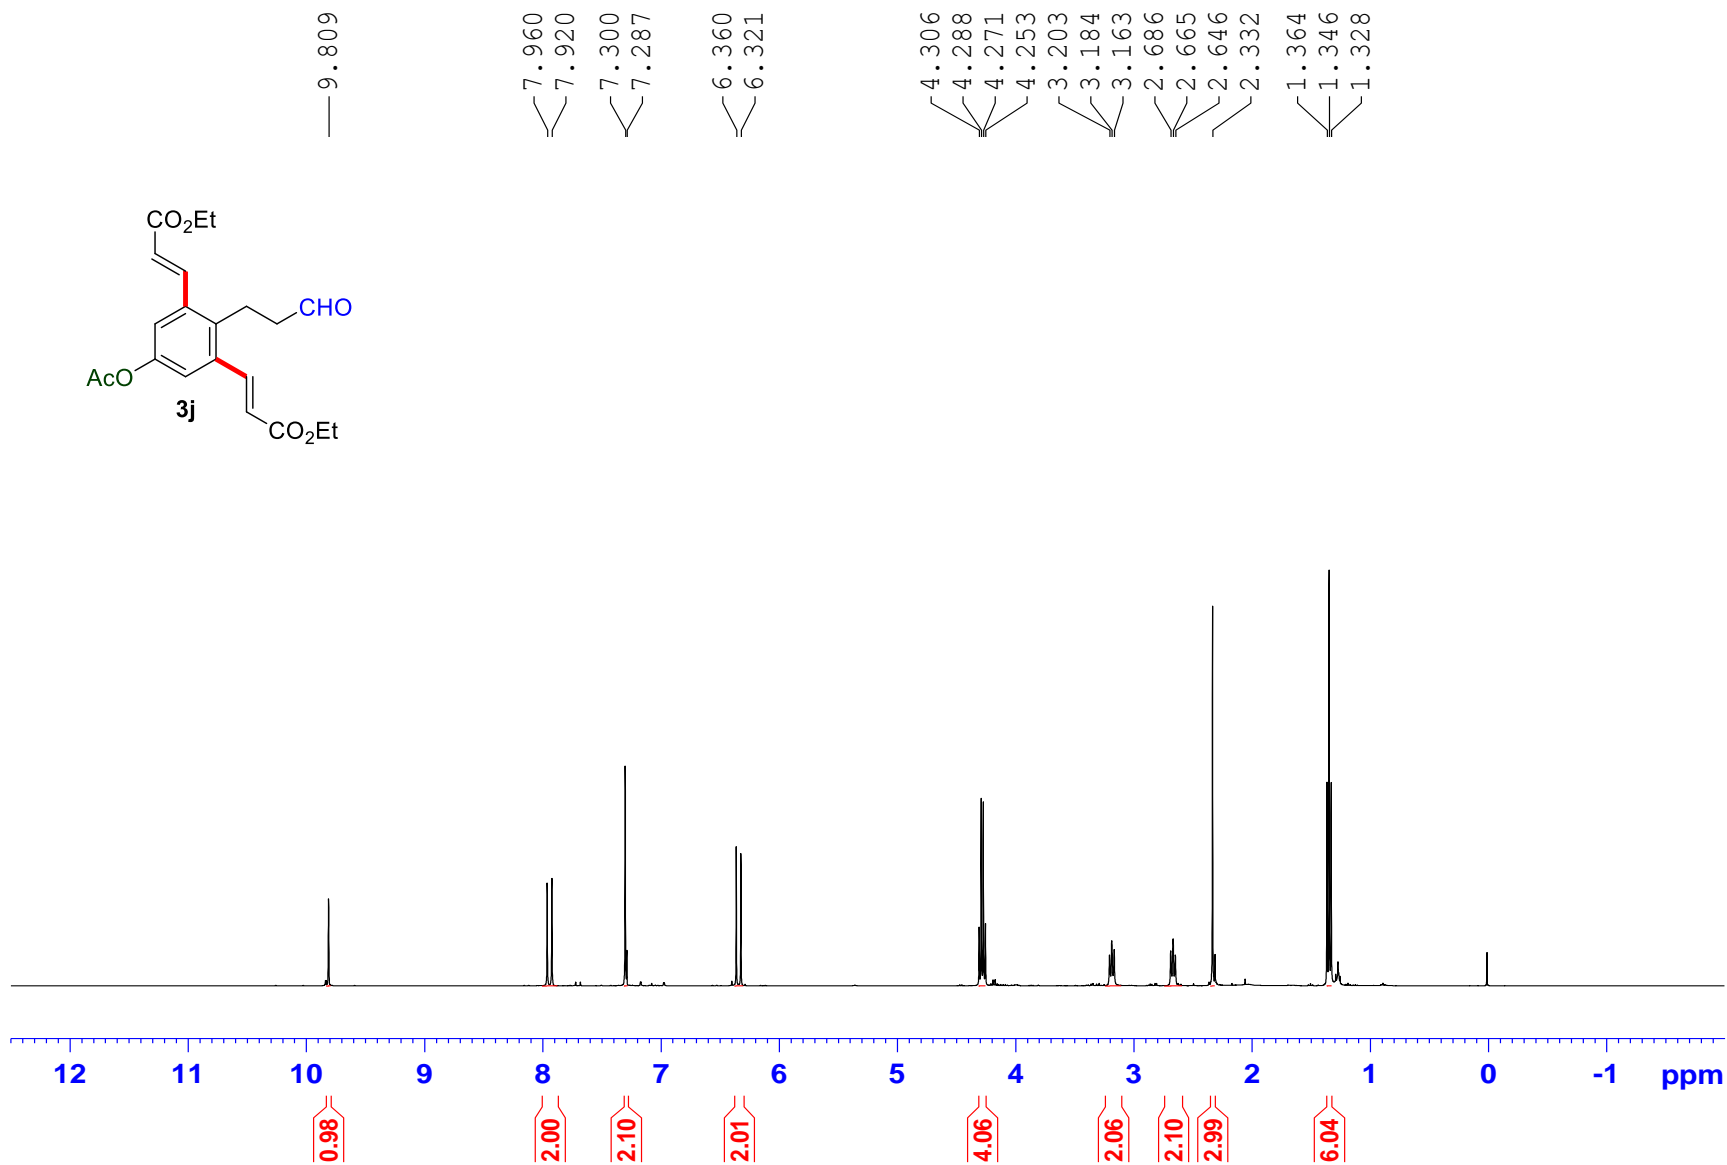

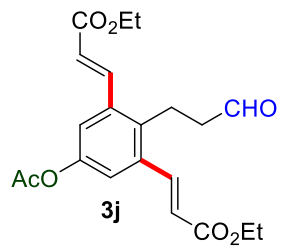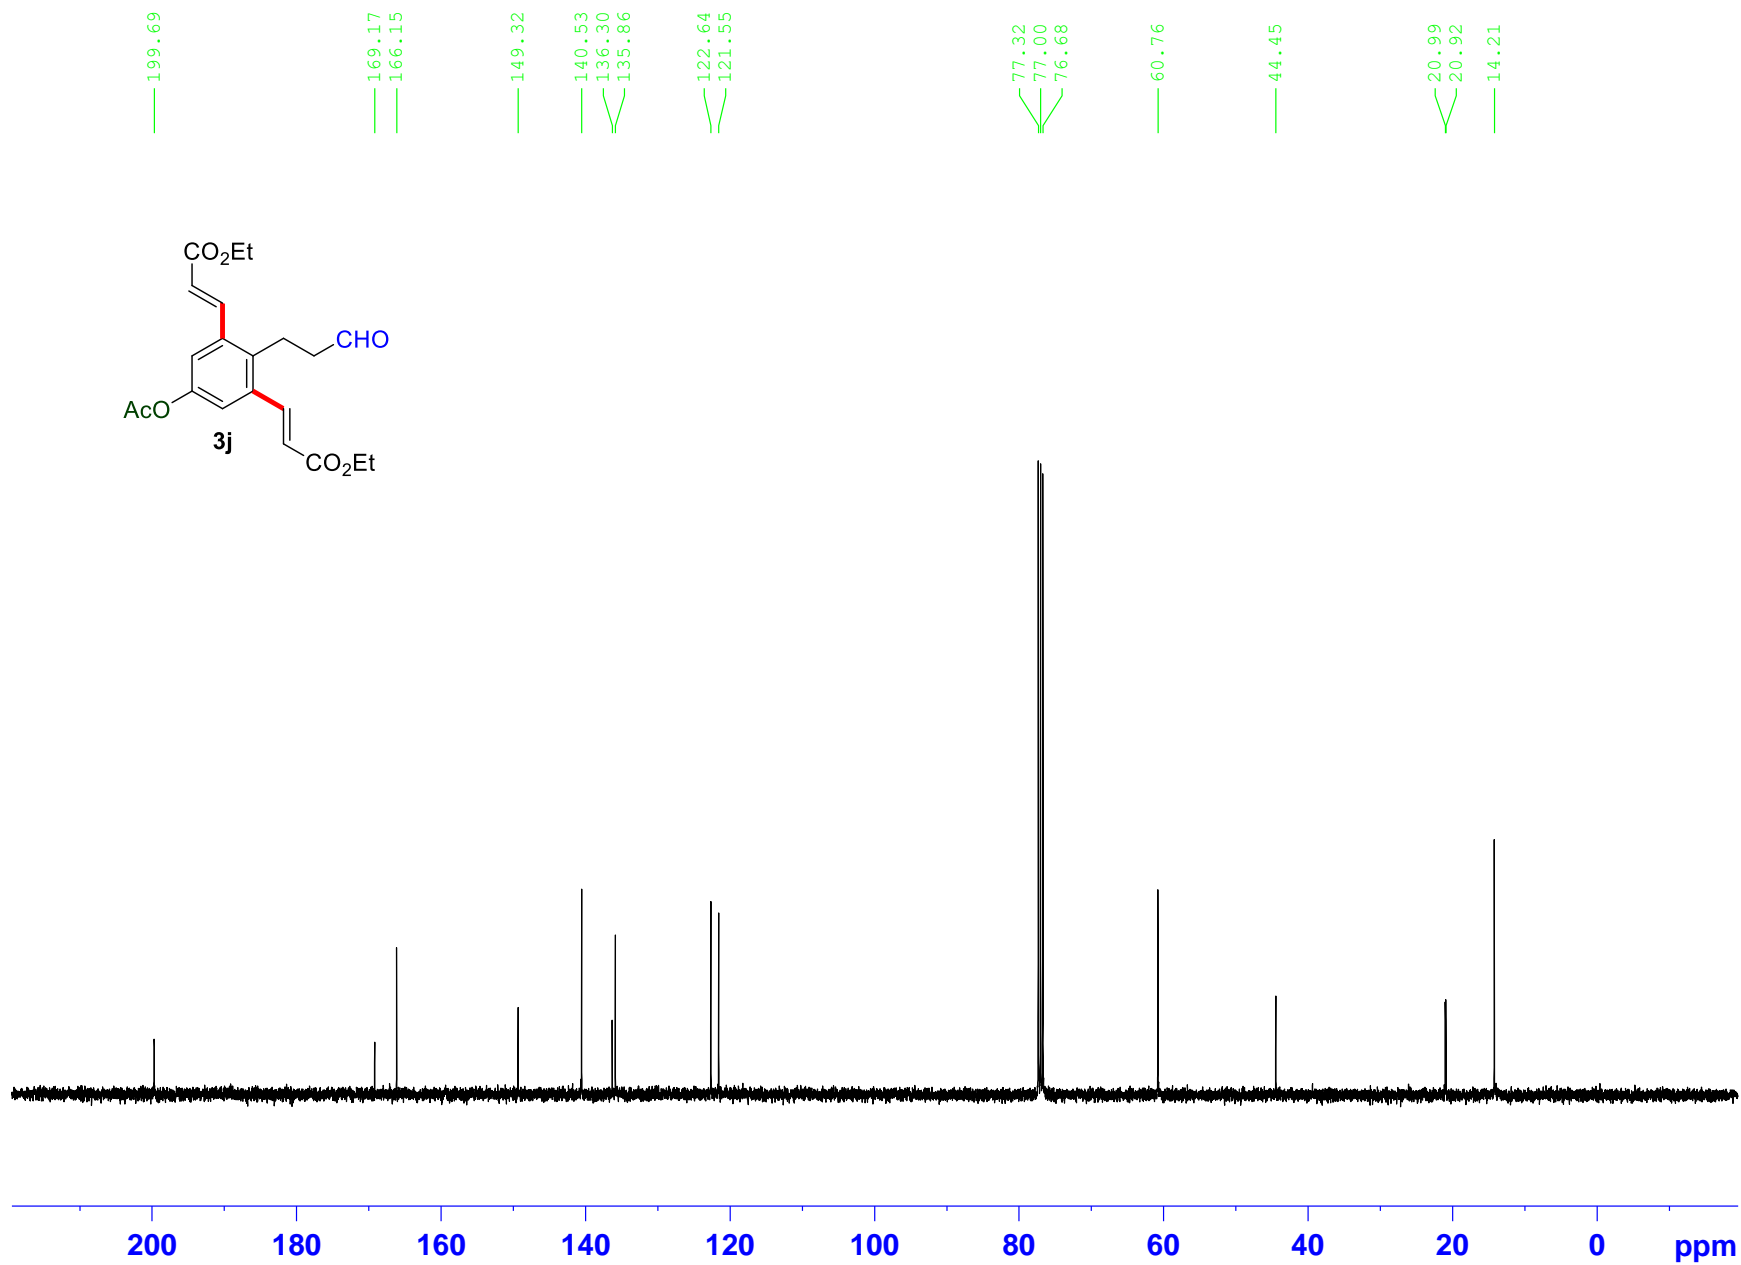

S266

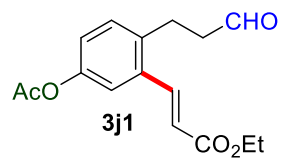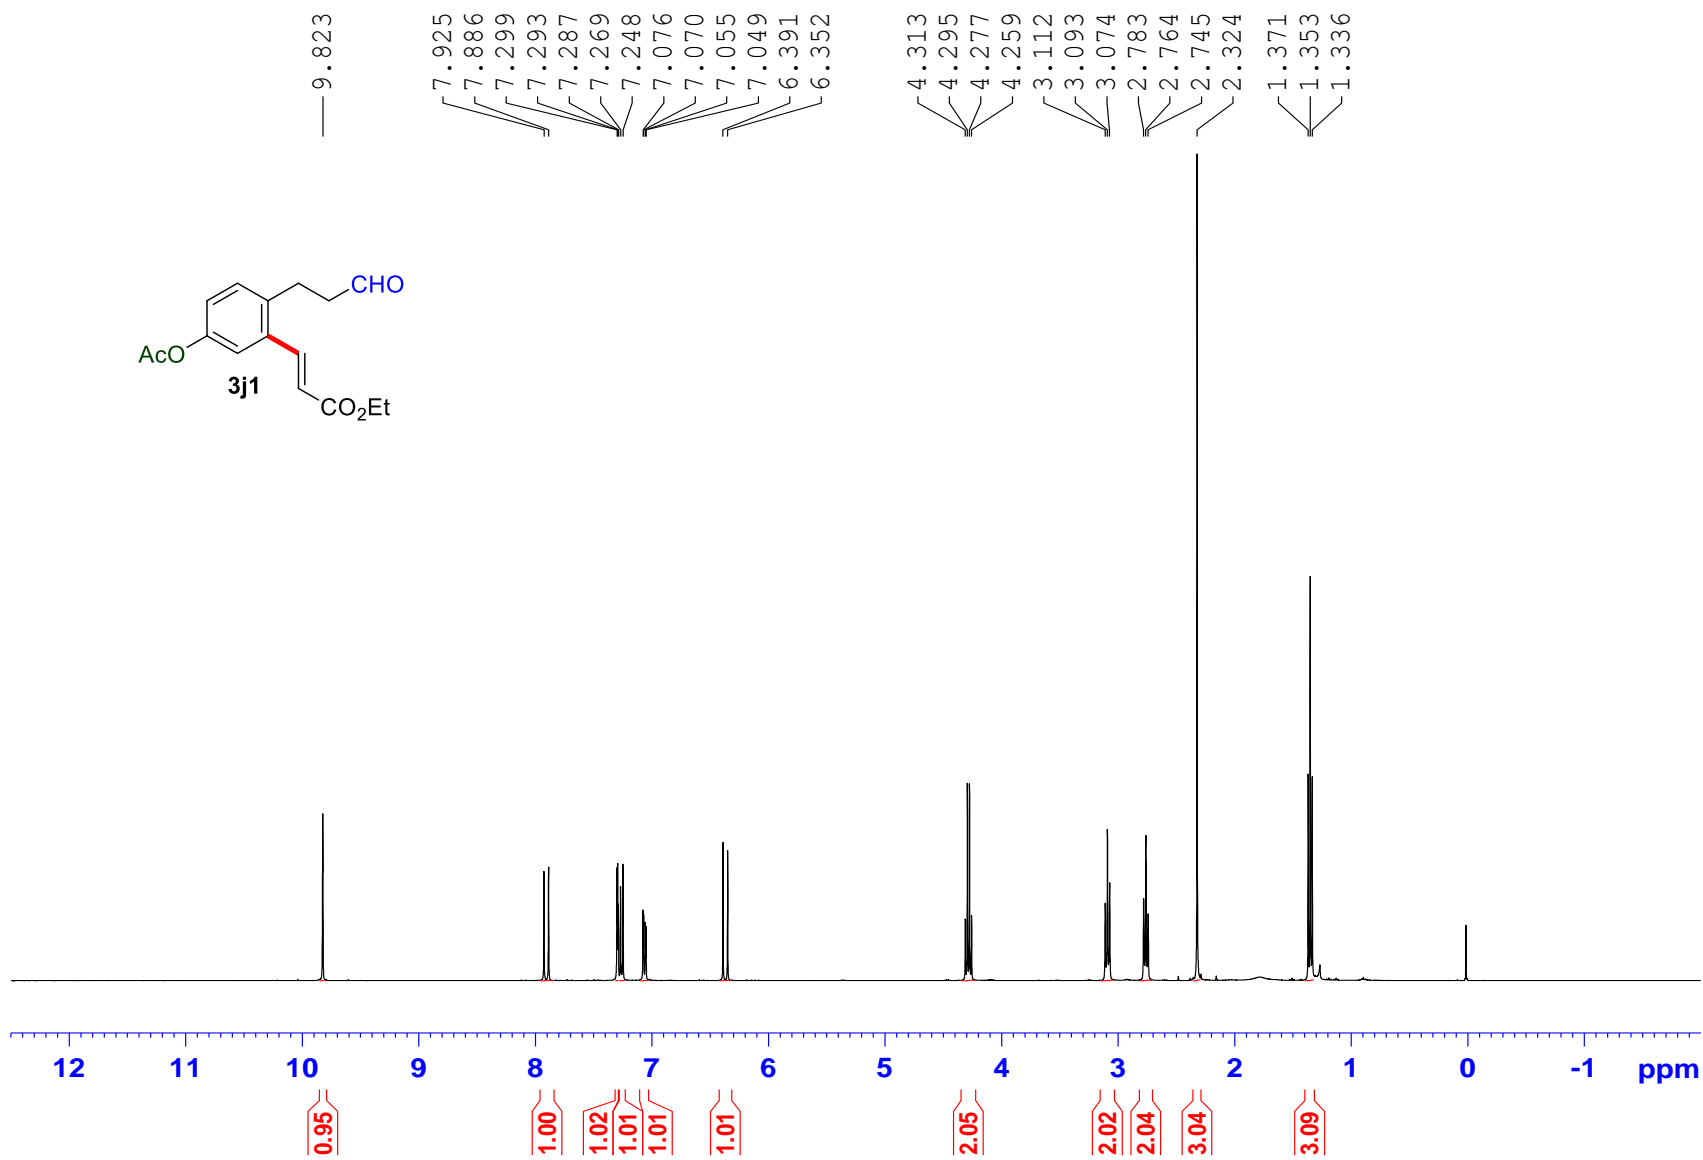

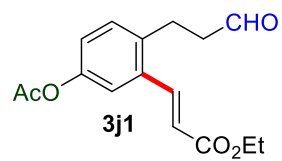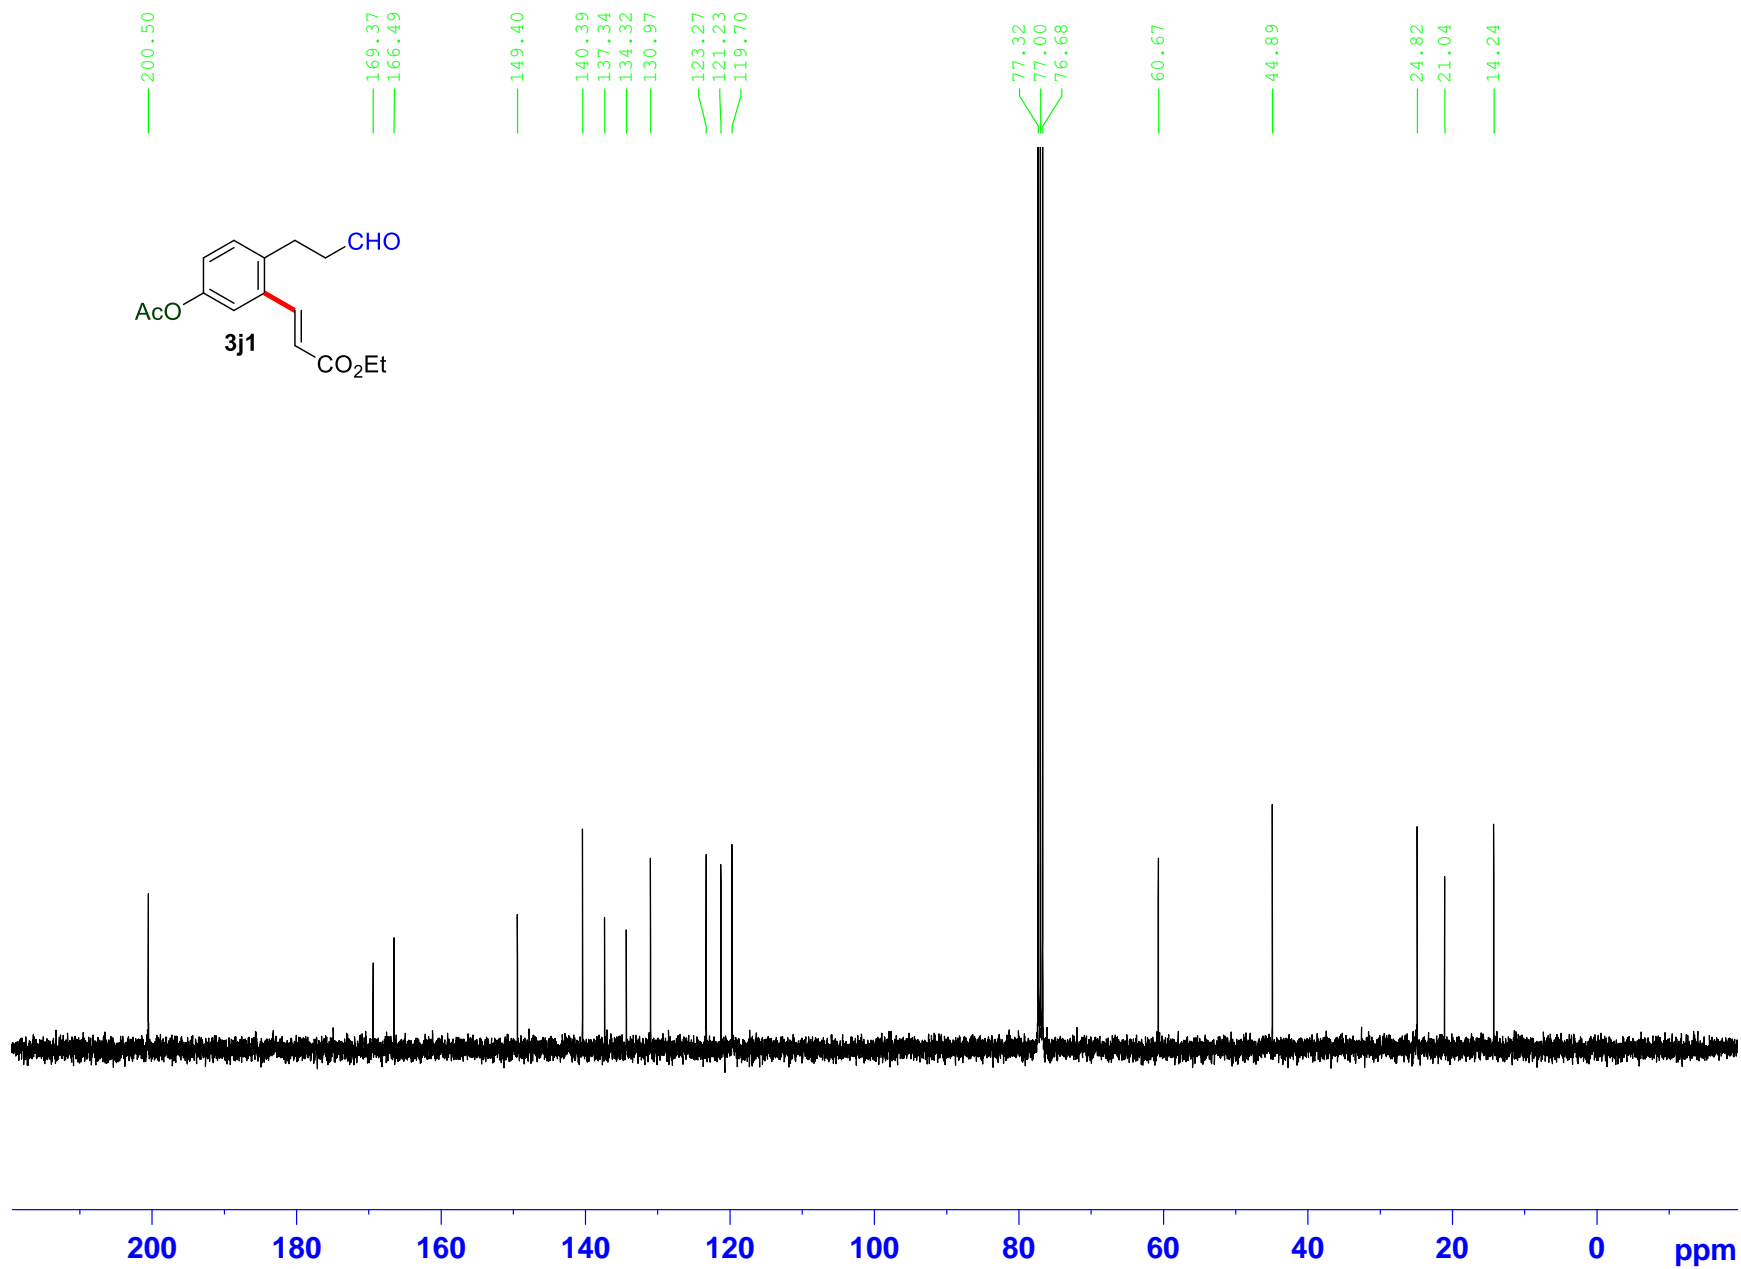

S268

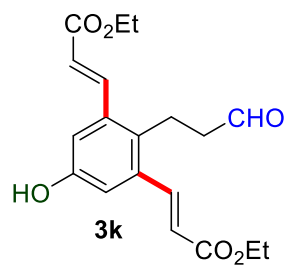

9.754

7.950  
7.911

7.264  
7.078

6.314  
6.274

4.302  
4.284  
4.266  
4.248

3.129  
3.110  
3.090

2.629  
2.609  
2.590

1.354  
1.336  
1.318

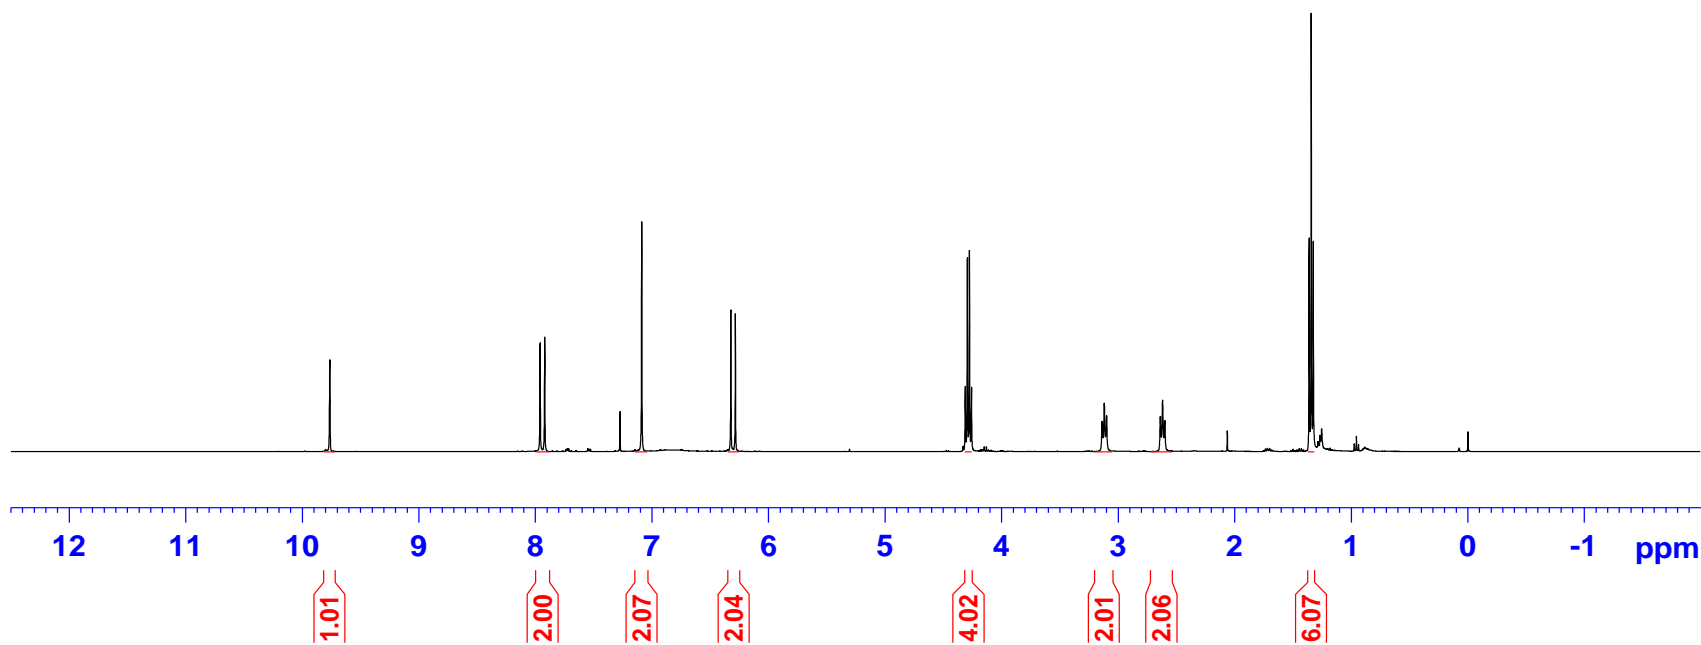

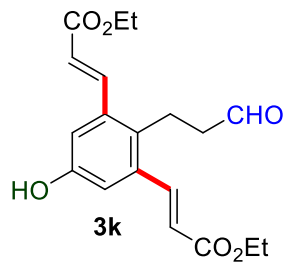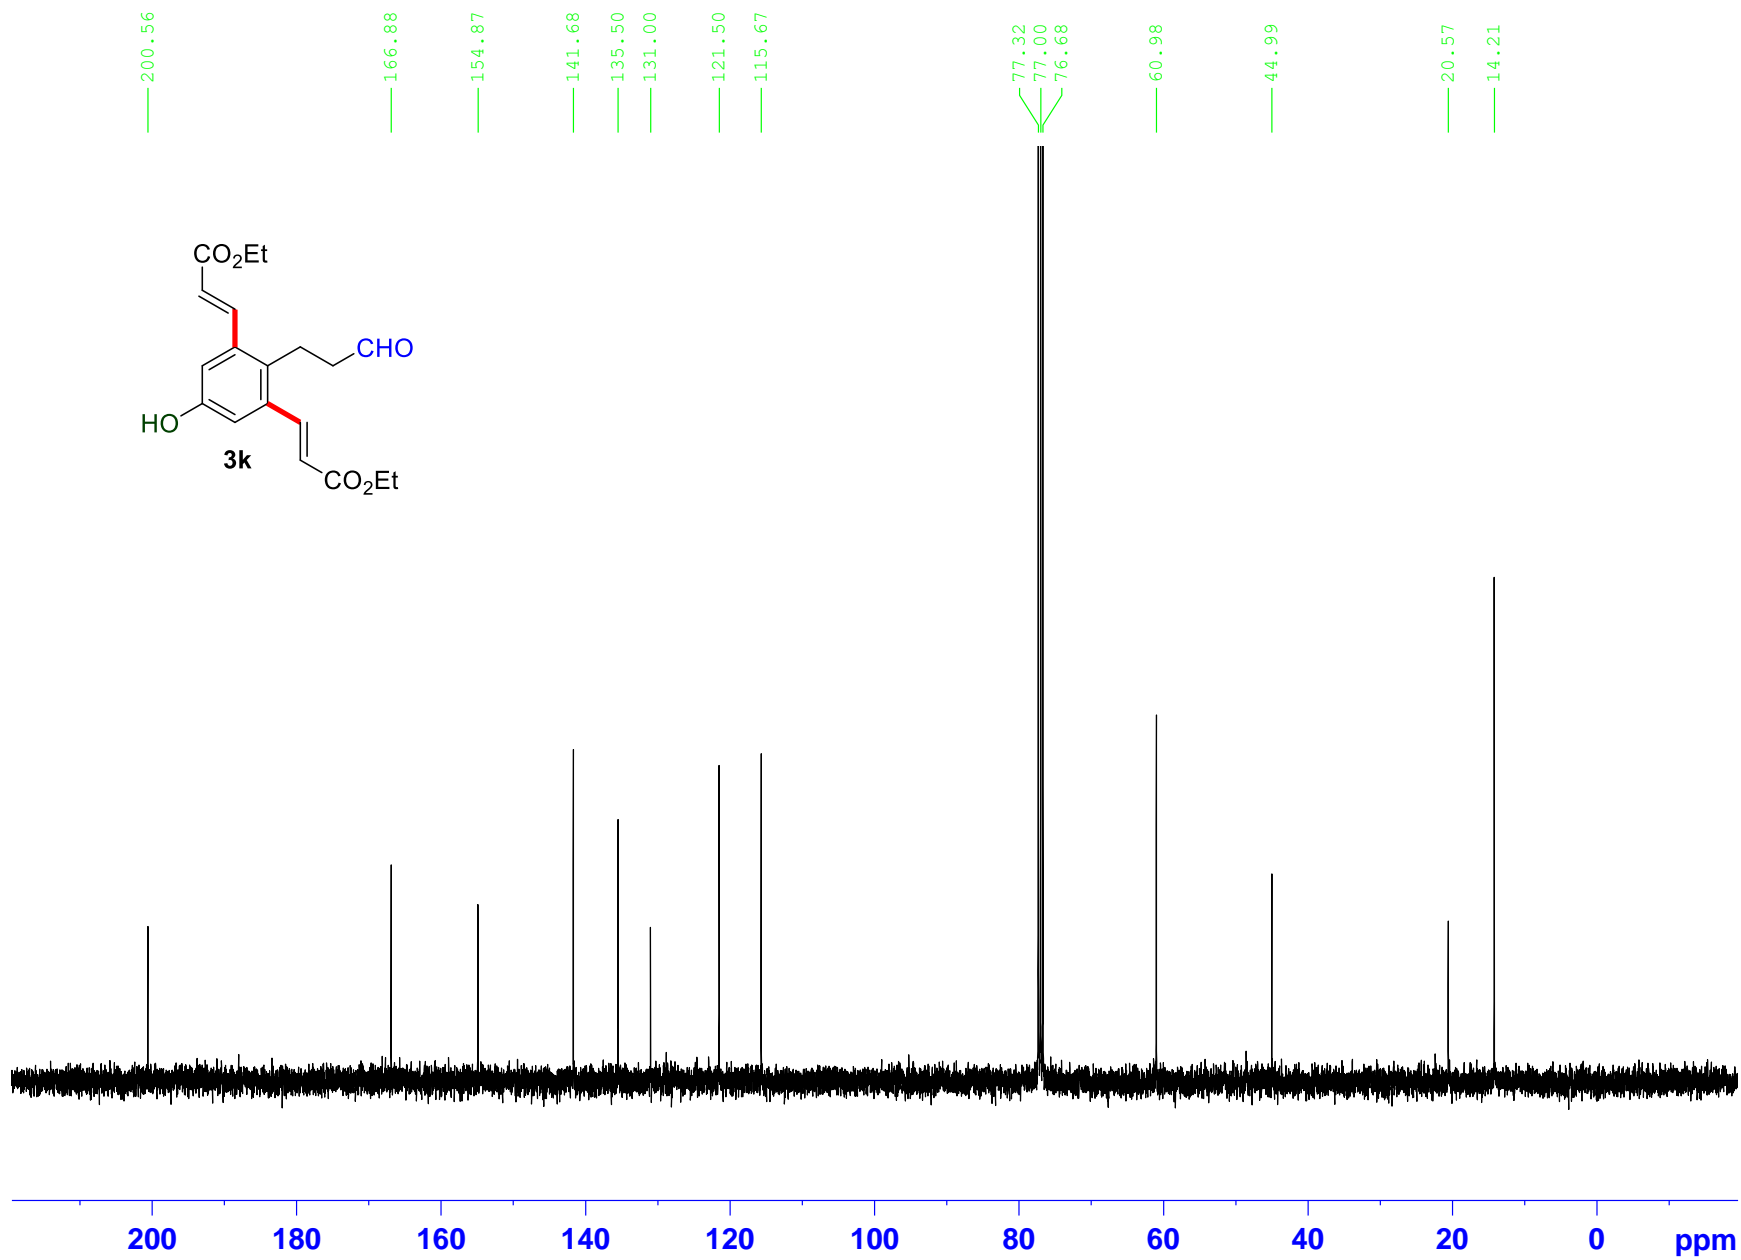

S270

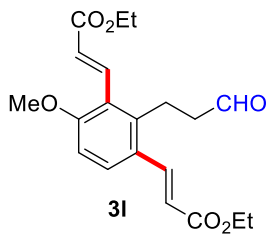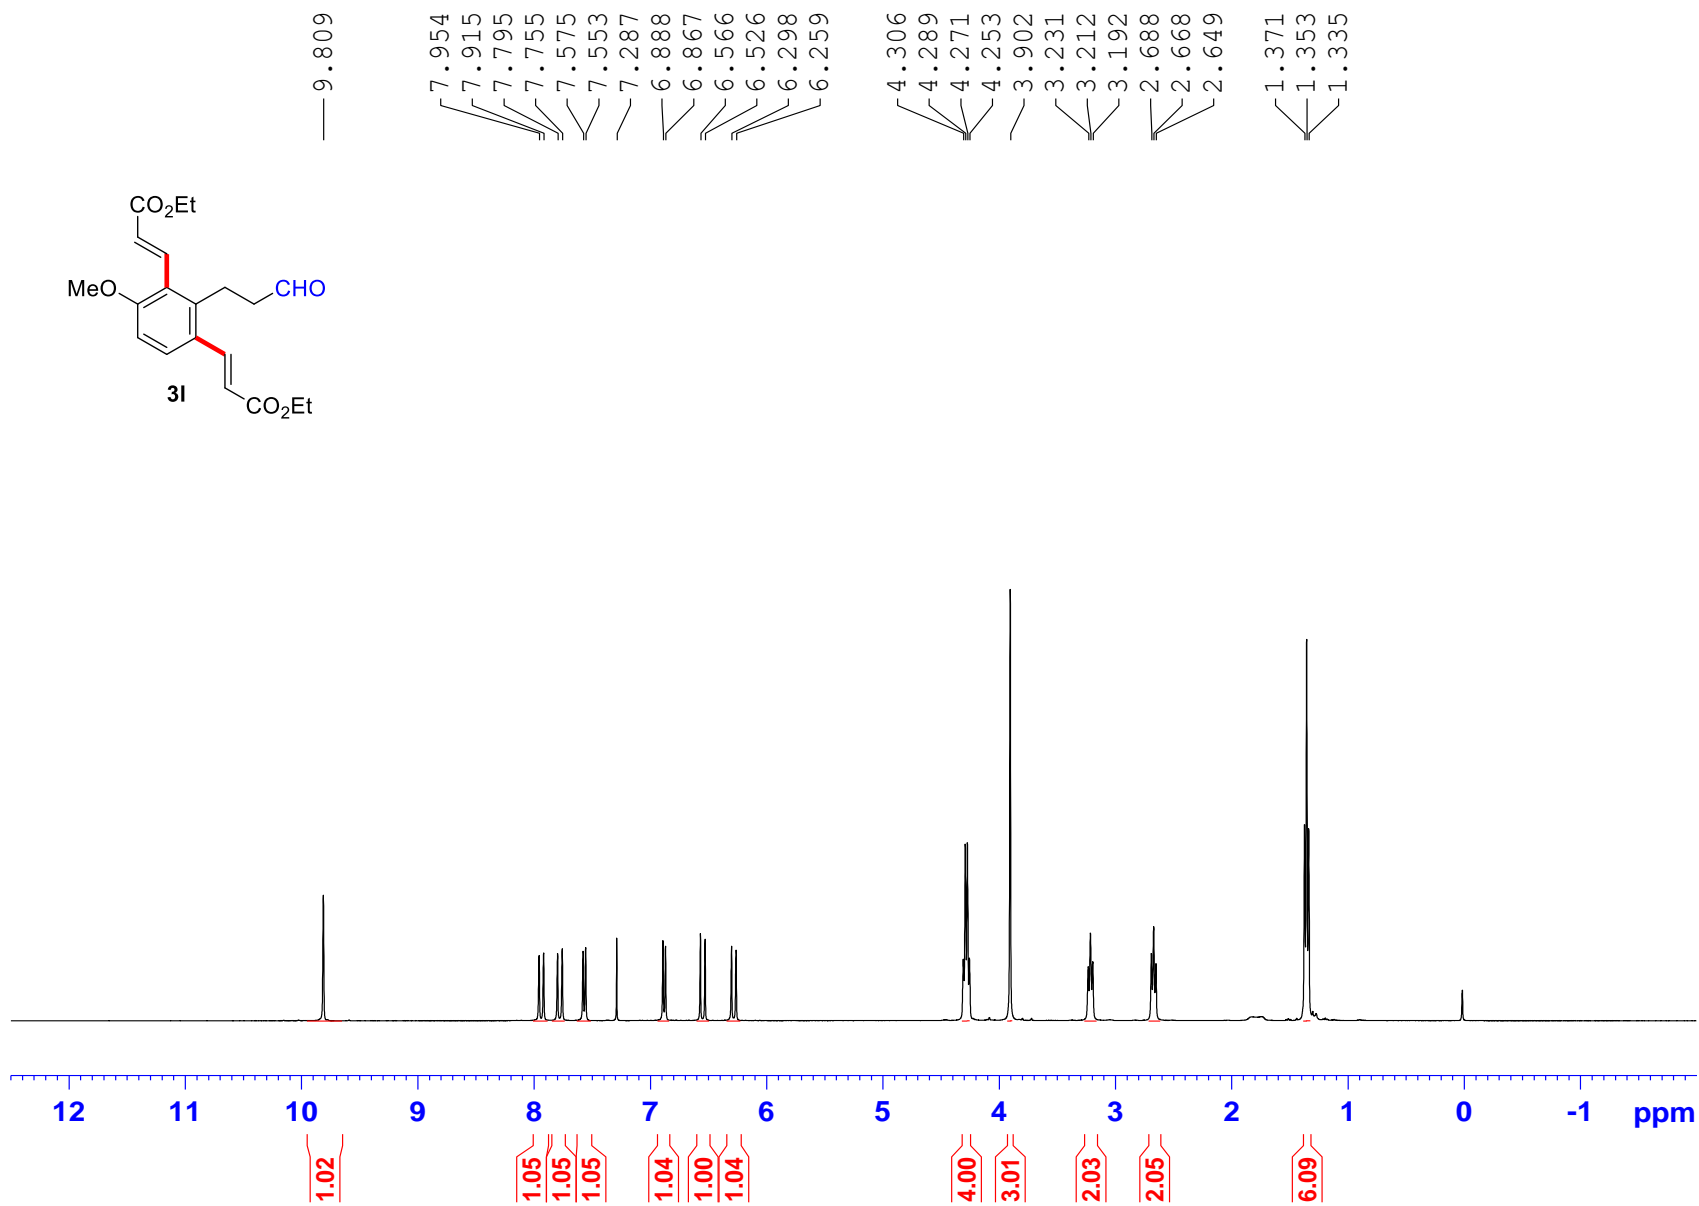

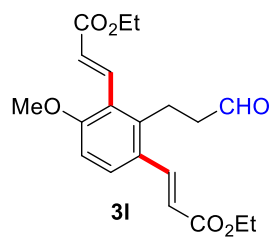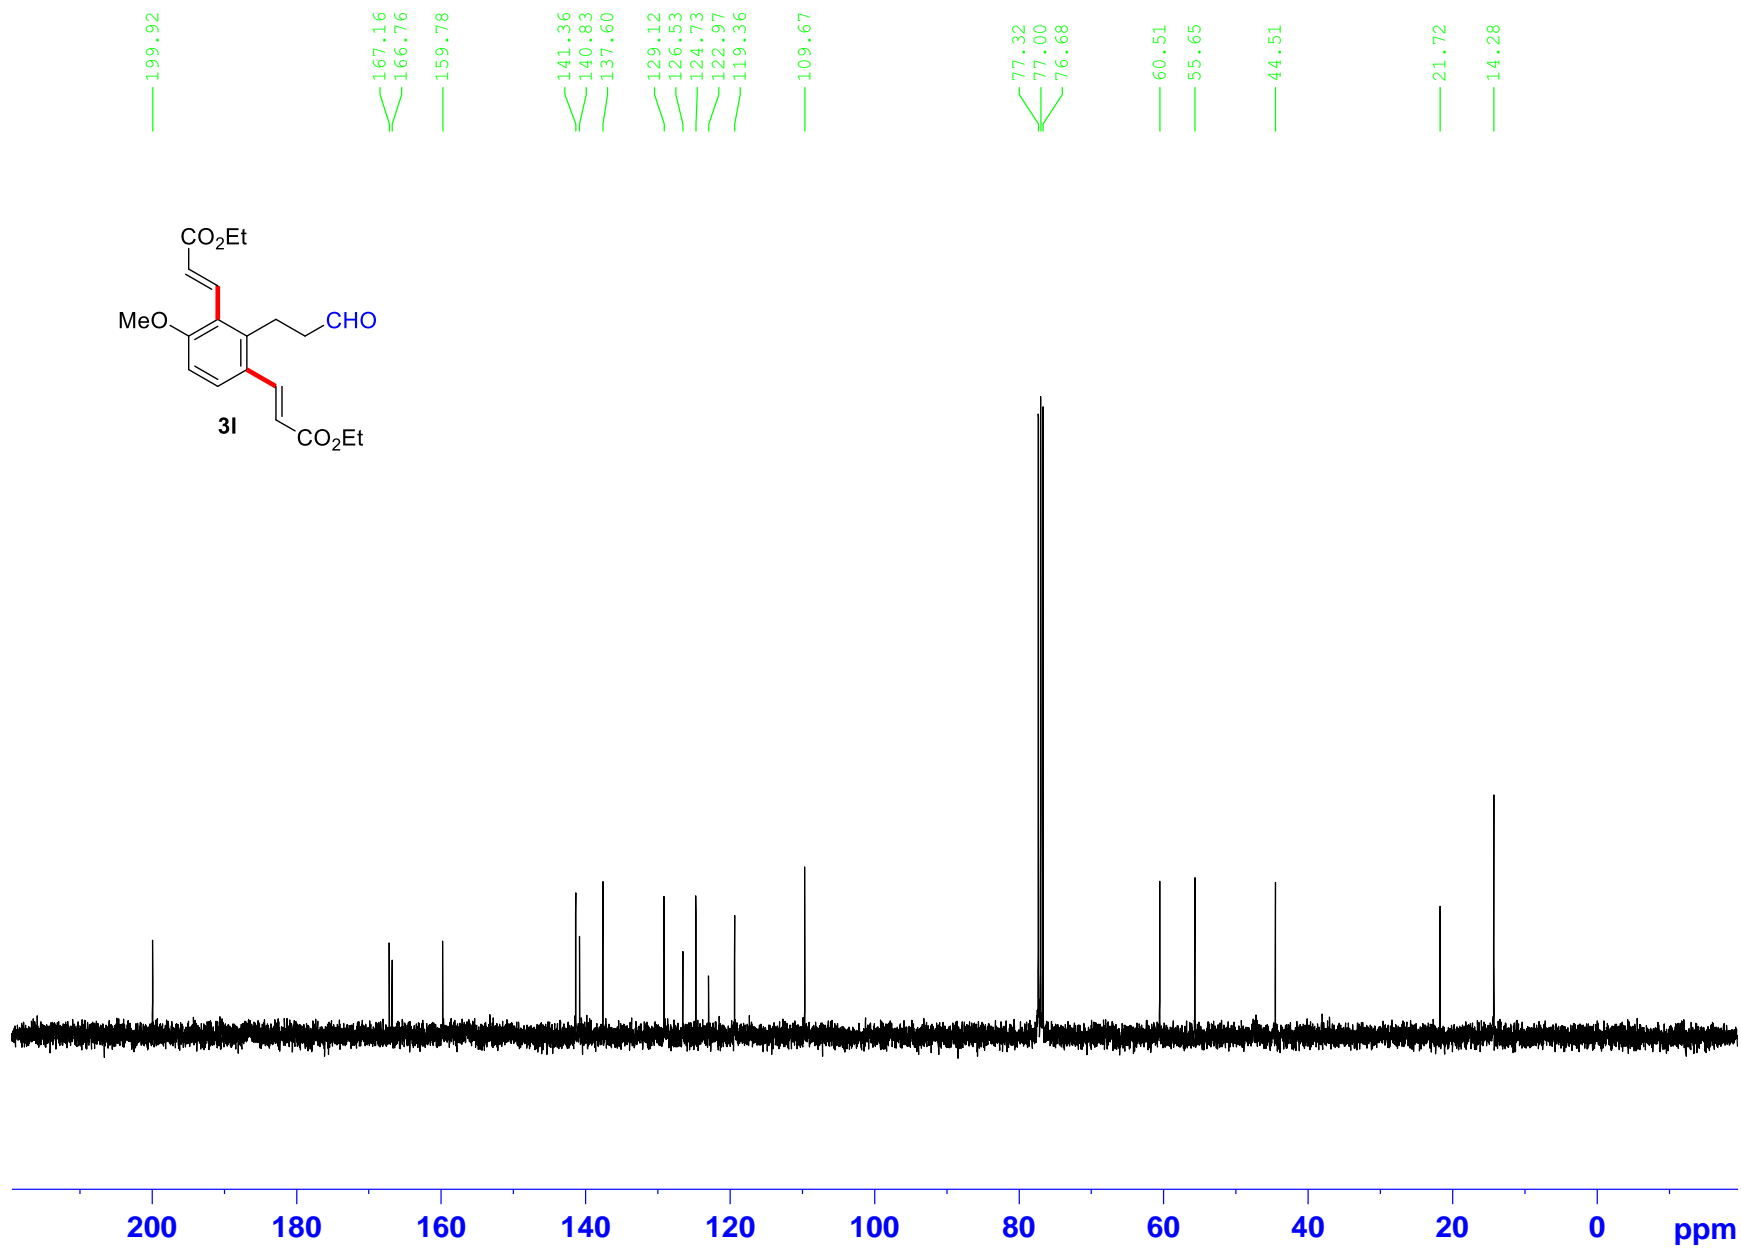



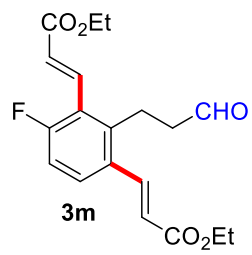

9.795  
7.927  
7.888  
7.699  
7.659  
7.533  
7.519  
7.511  
7.497  
7.286  
7.064  
7.039  
7.017  
6.531  
6.527  
6.491  
6.487  
6.315  
6.276  
4.303  
4.294  
4.285  
4.277  
4.268  
4.259  
4.250  
4.241  
3.208  
3.189  
3.168  
2.692  
2.672  
2.653  
1.360  
1.355  
1.342  
1.337  
1.324  
1.319

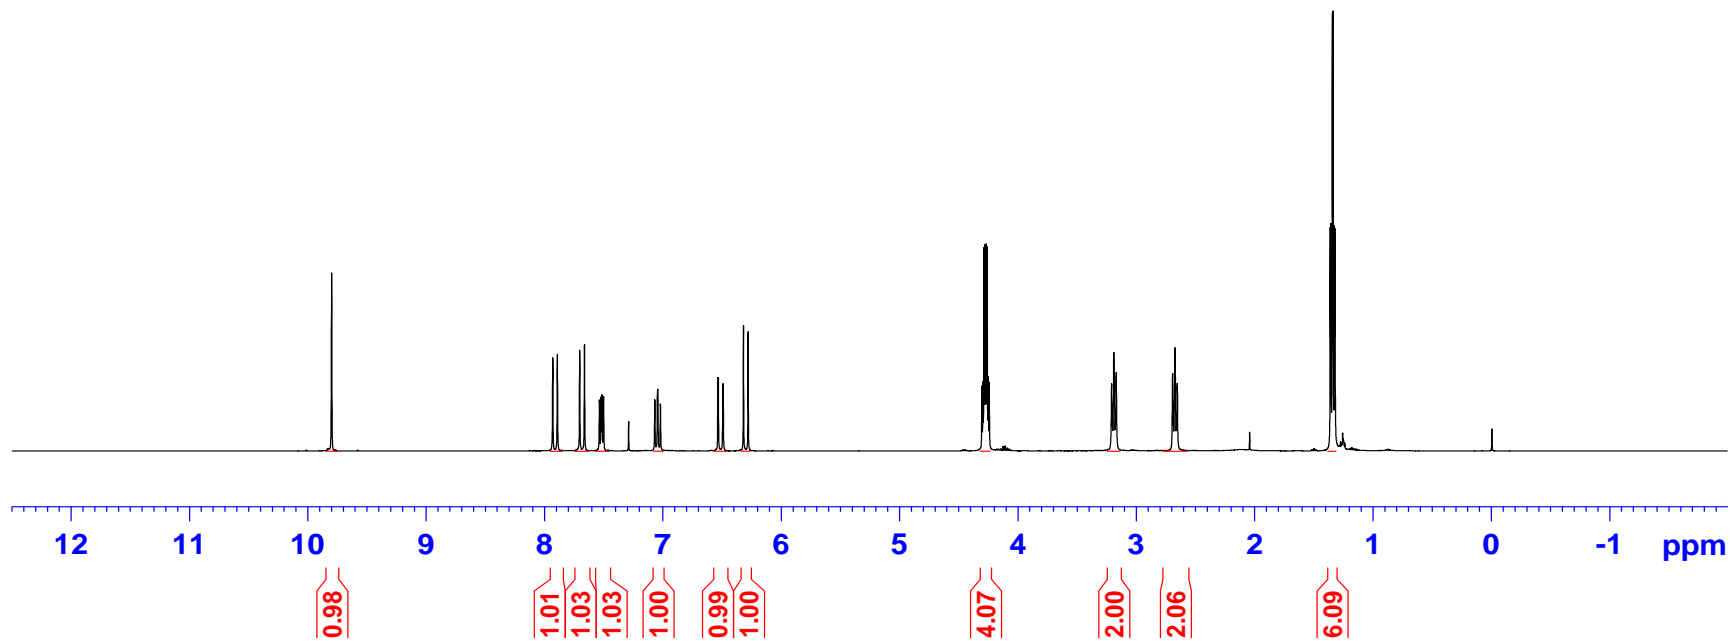

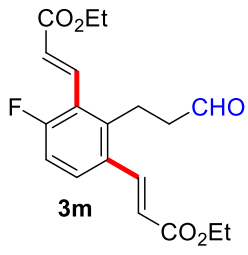

199.44

166.47  
166.28  
163.19  
160.64

141.36  
141.34  
140.58  
134.68  
130.37  
130.34  
129.42  
129.32  
126.14  
126.02  
122.33  
122.21  
121.49  
115.06  
114.82

77.32  
77.00  
76.68

60.75  
60.67

44.09

21.67  
14.20  
14.18

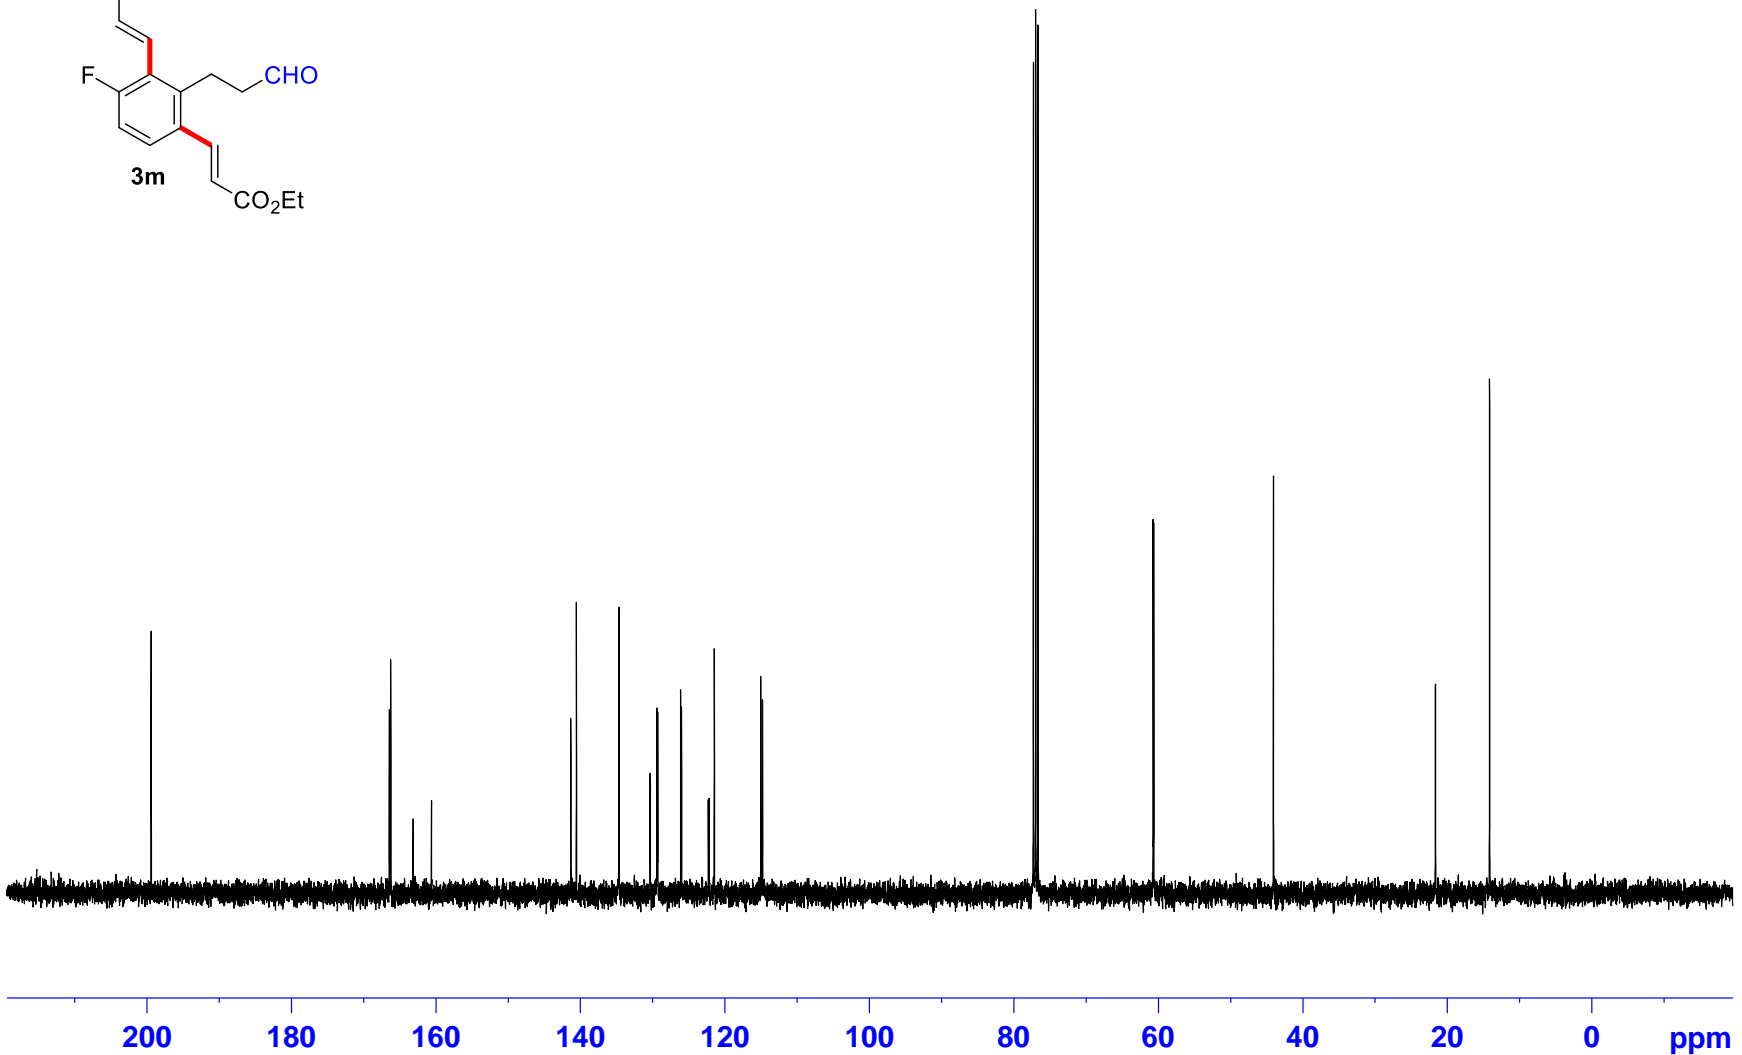

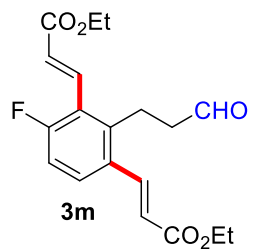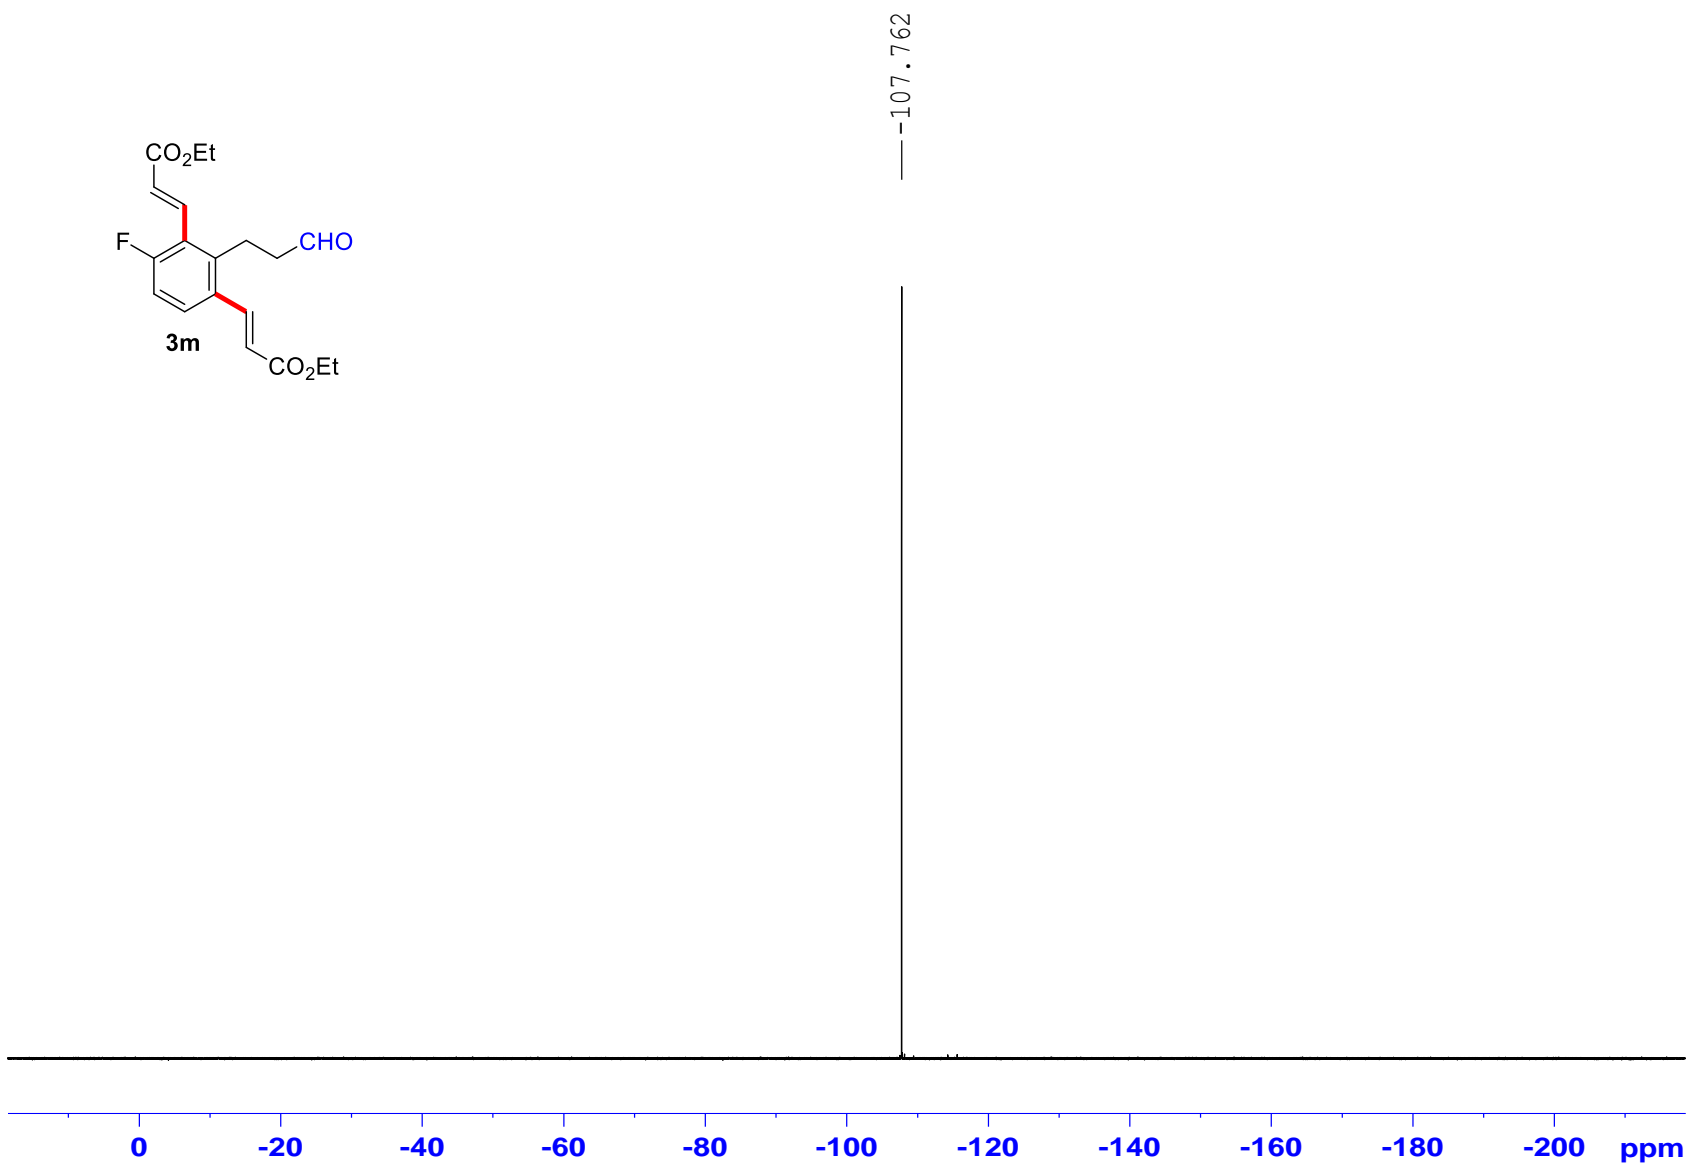

S275

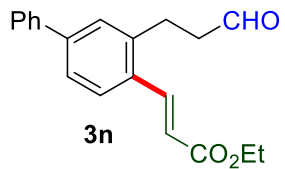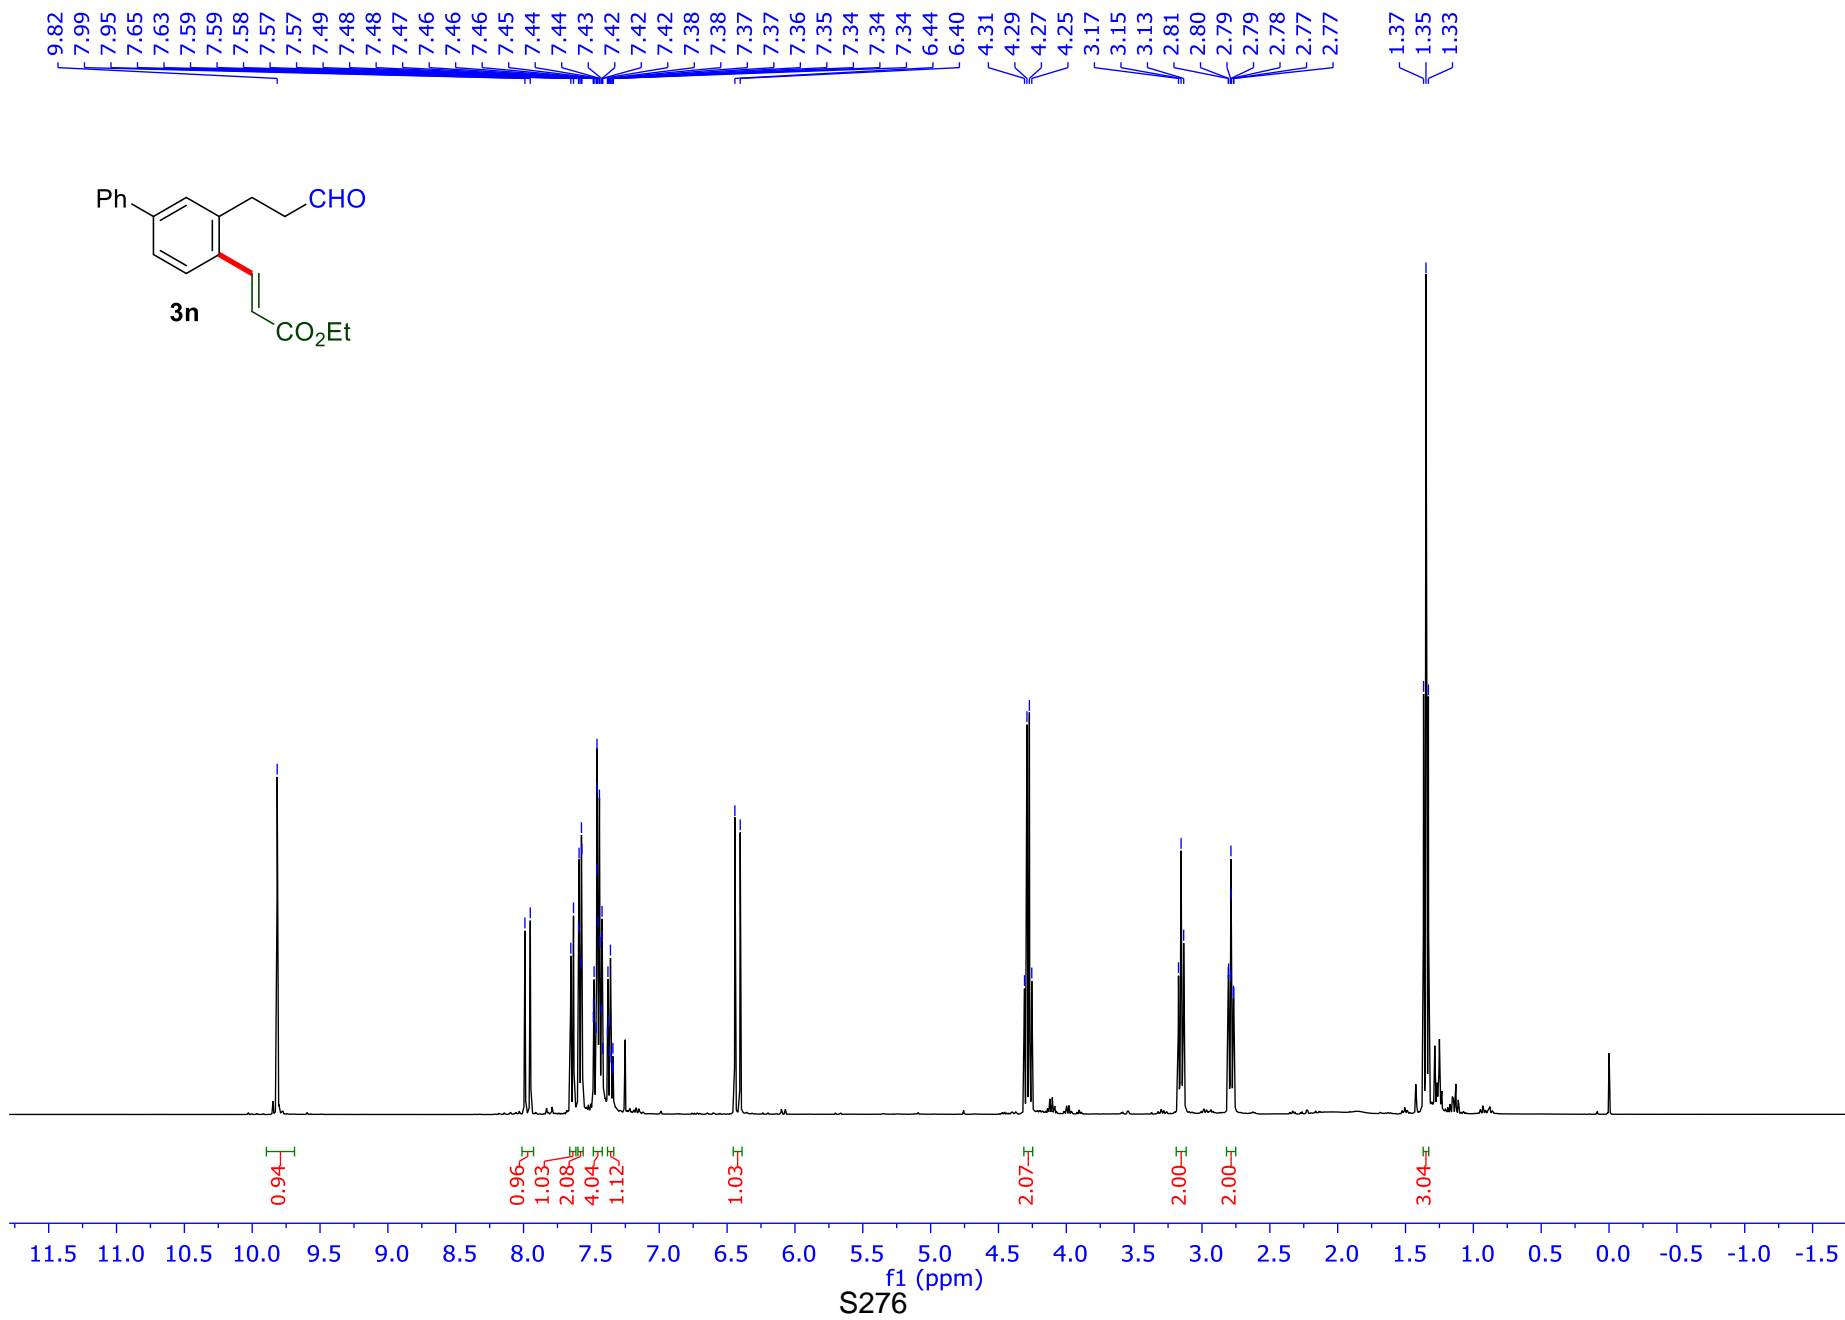

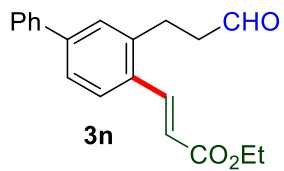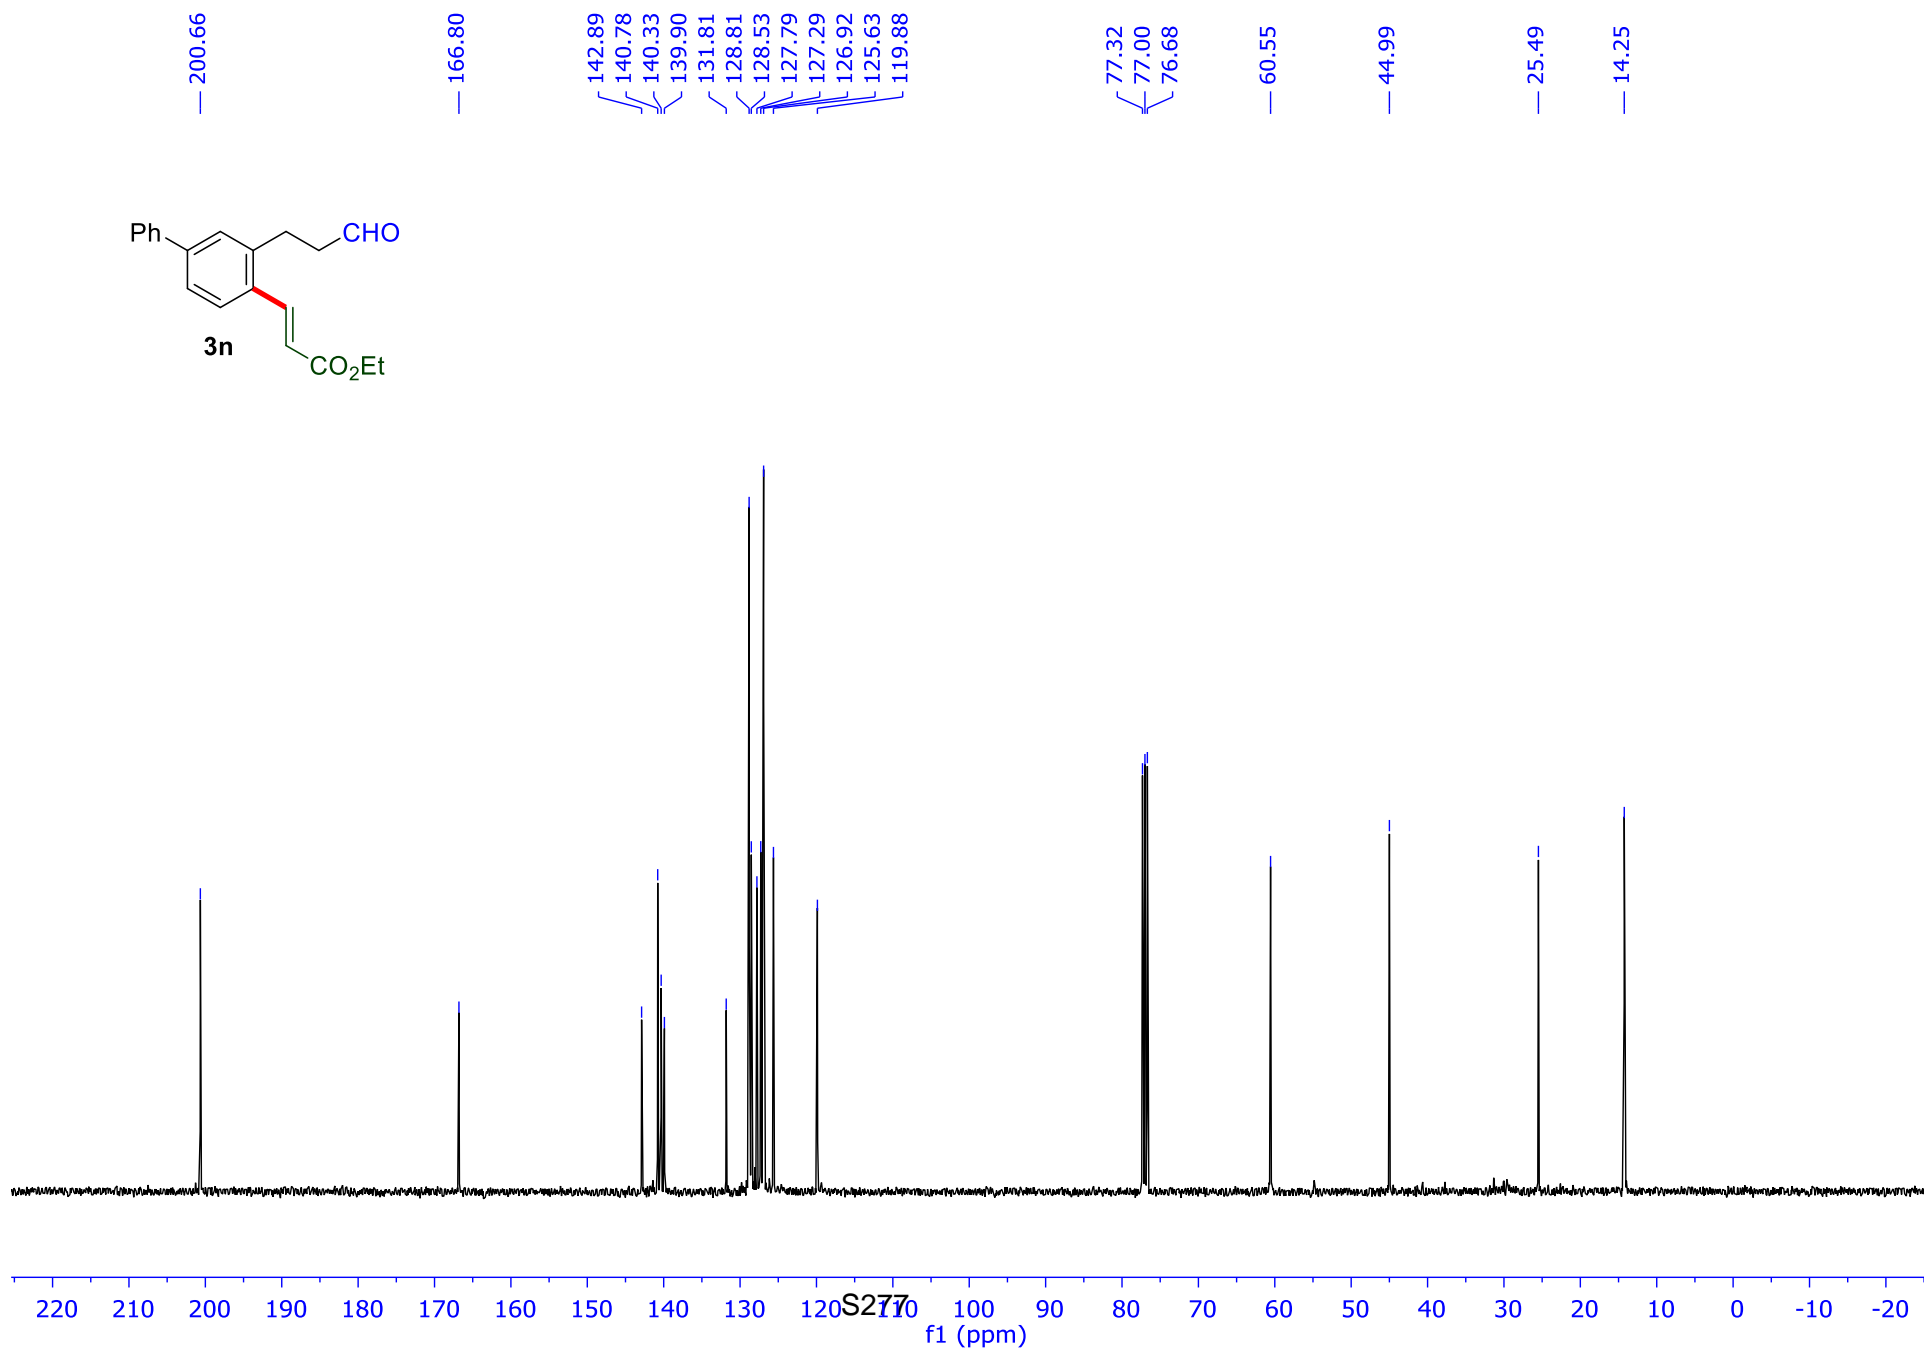

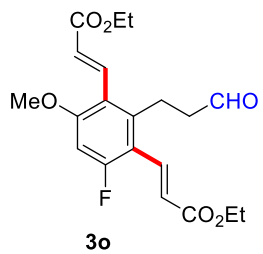

9.792

7.711  
 7.671  
 7.663  
 7.623  
 7.268  
 6.656  
 6.624  
 6.513  
 6.491  
 6.487  
 6.473  
 6.451  
 6.447  
 4.291  
 4.274  
 4.256  
 4.238  
 3.875  
 3.214  
 3.195  
 3.174  
 2.682  
 2.661  
 2.642  
 1.355  
 1.337  
 1.319

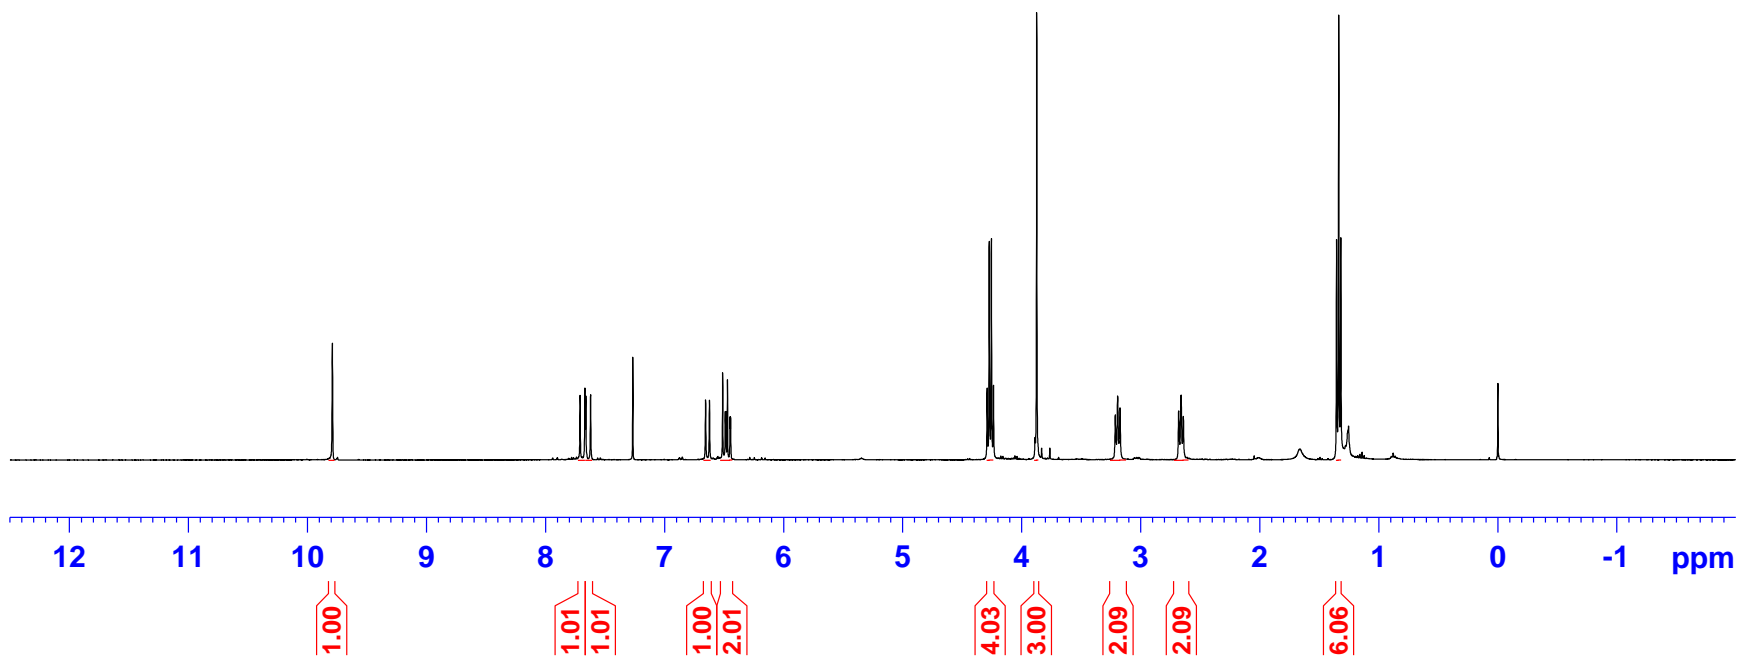

S278

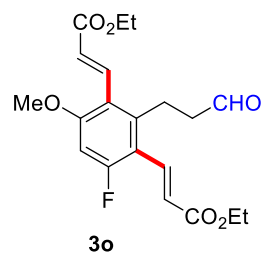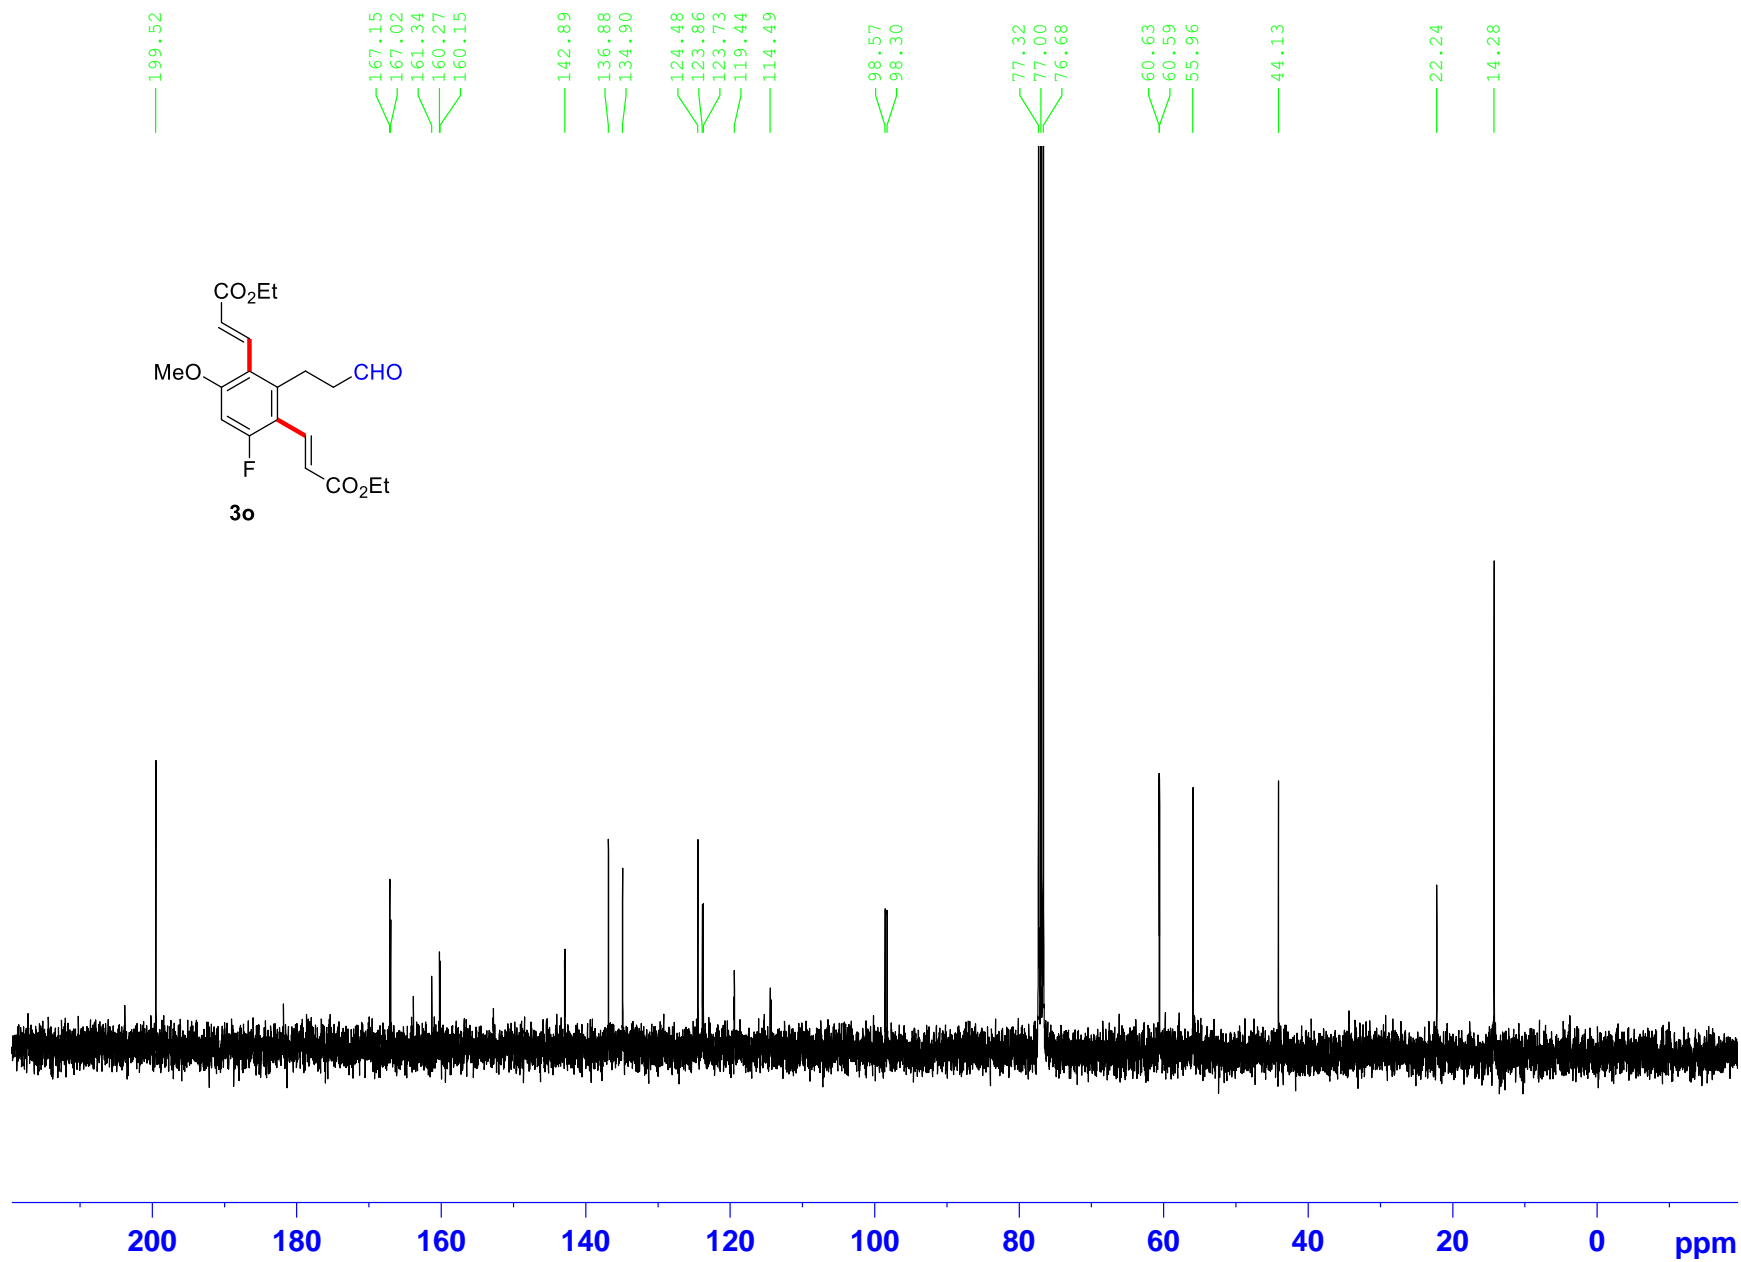

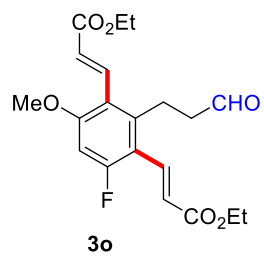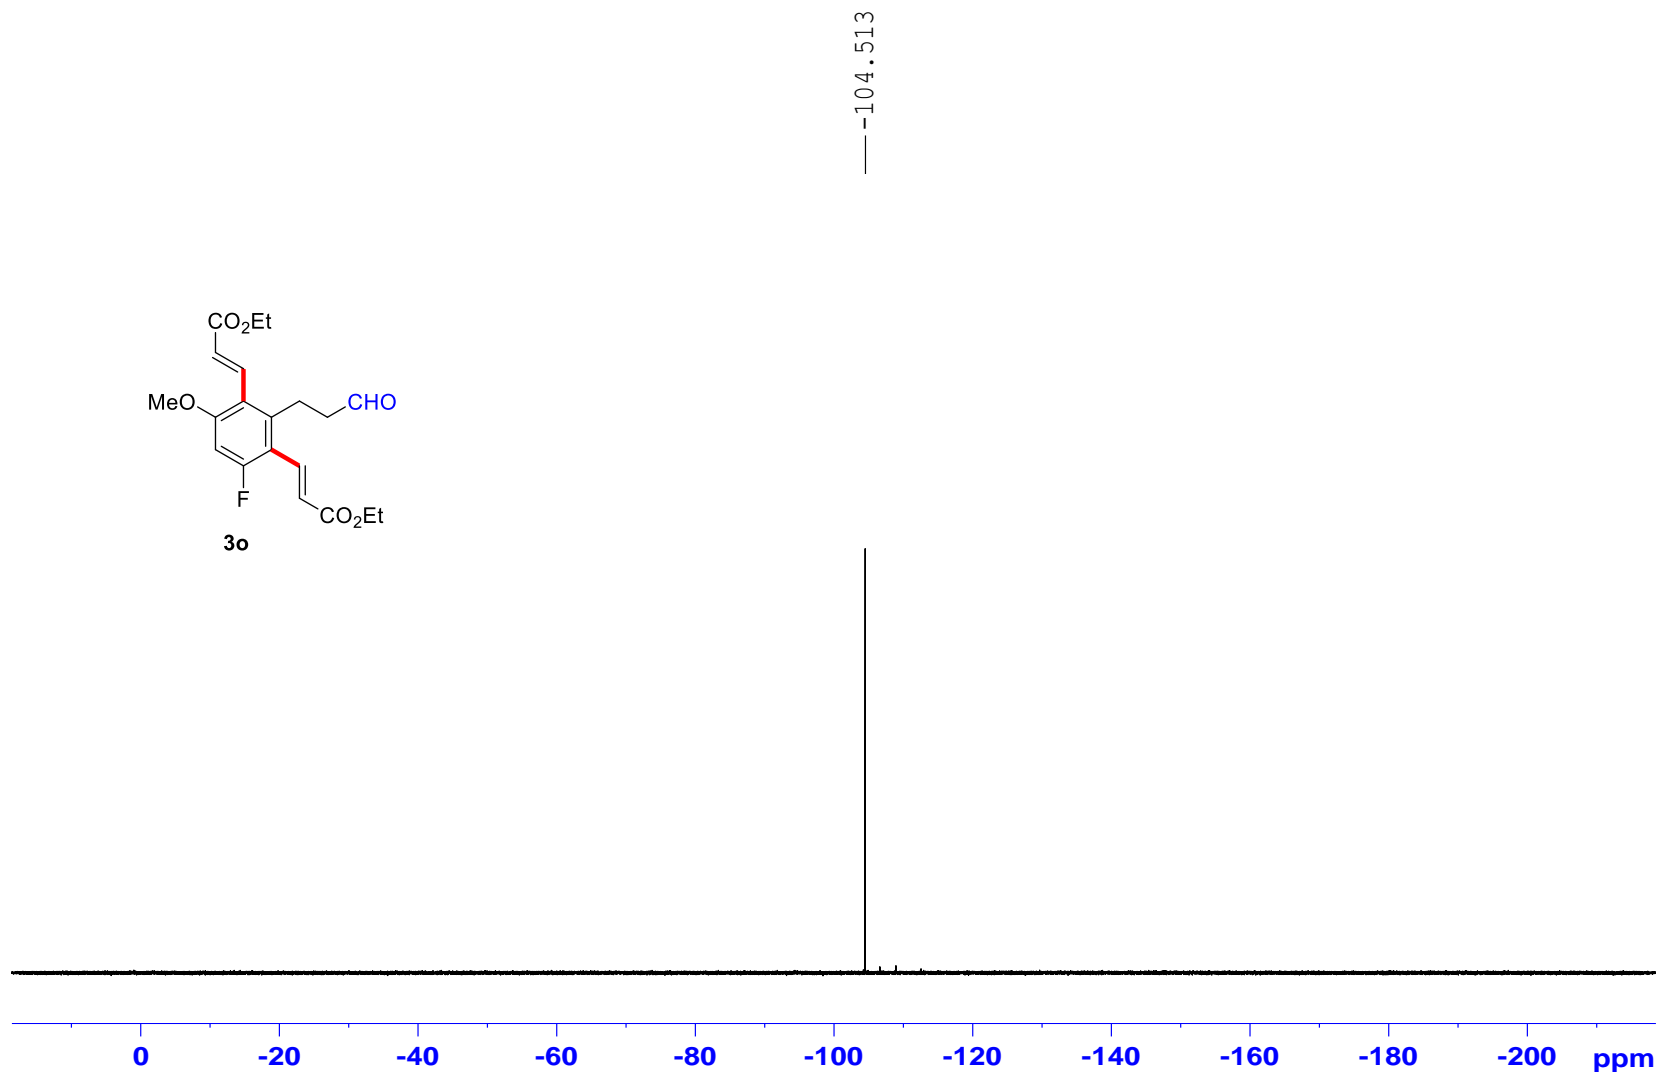

S280



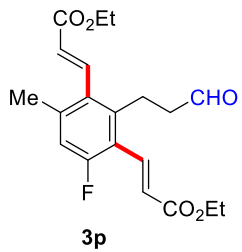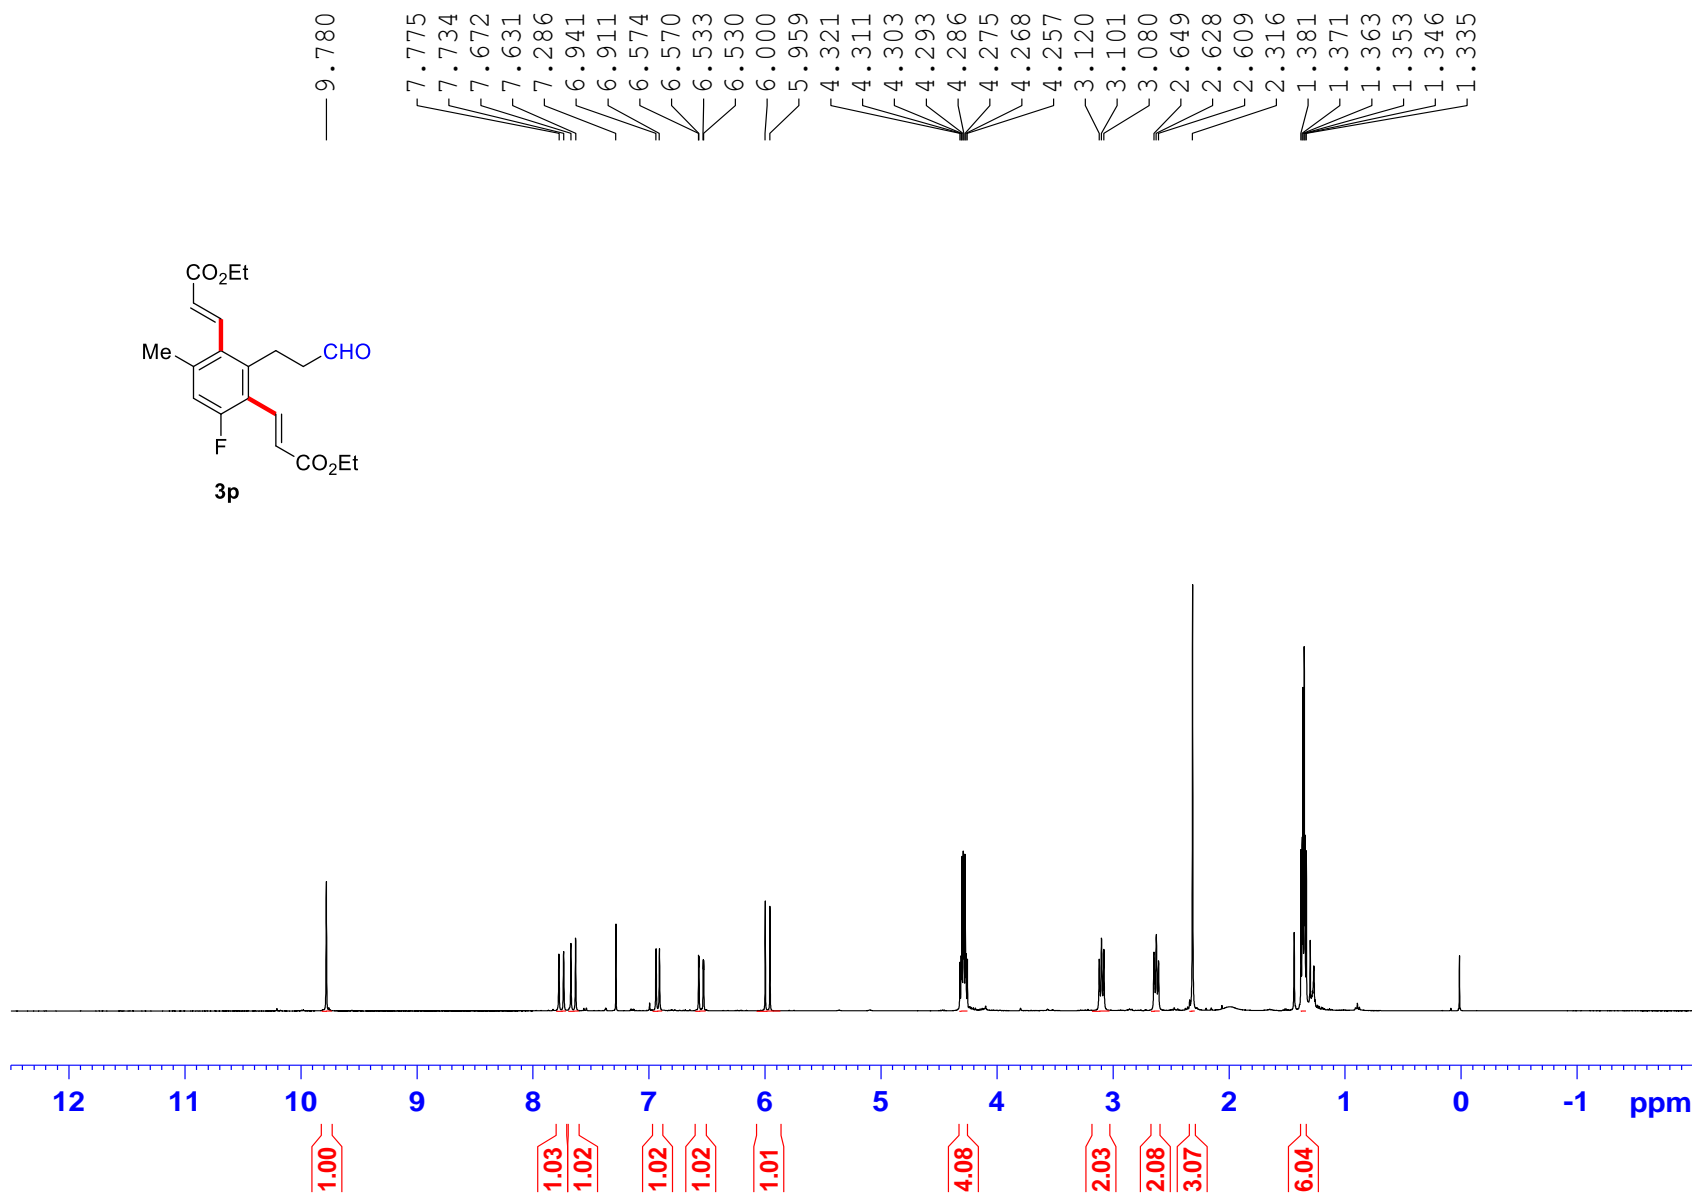

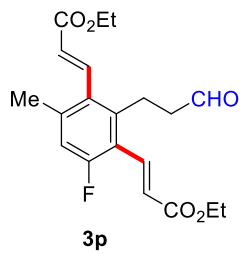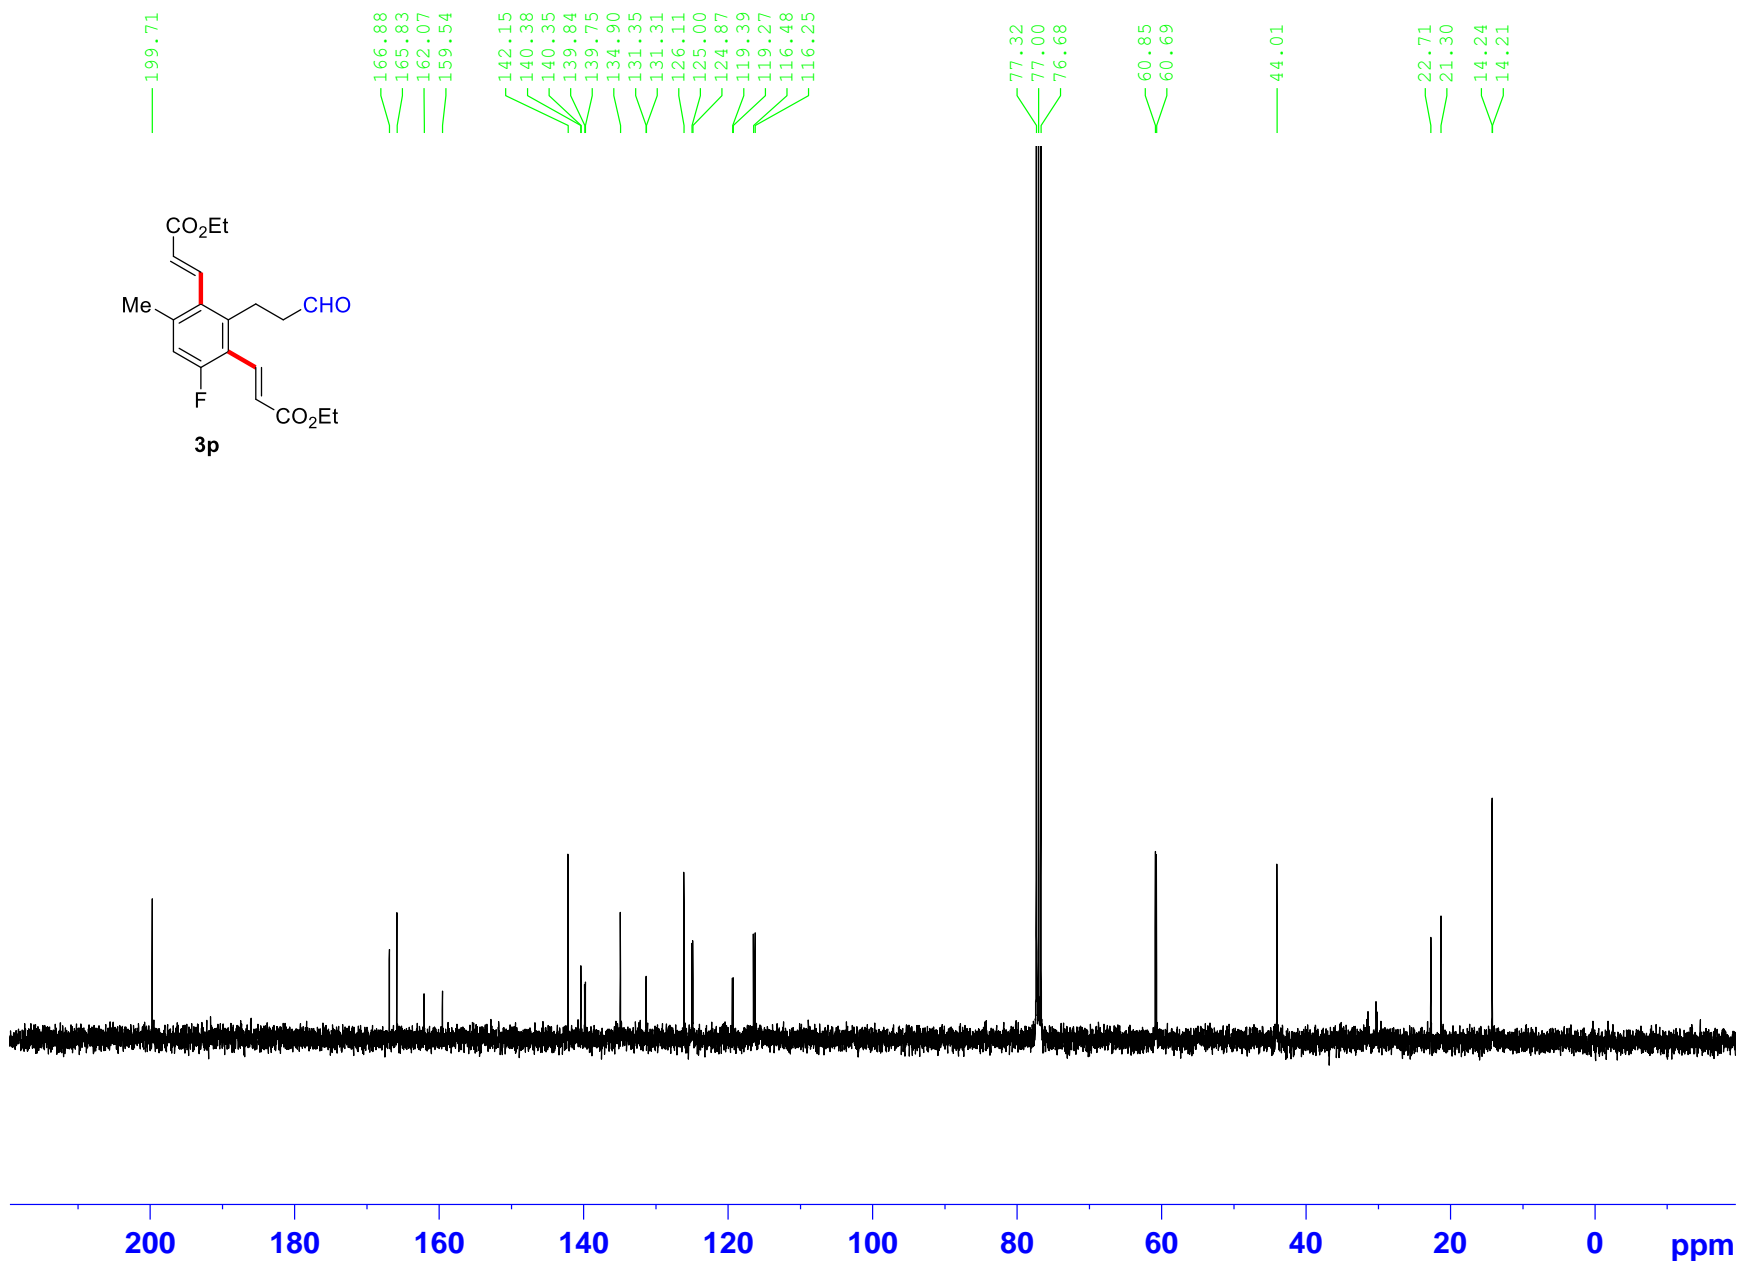

S282

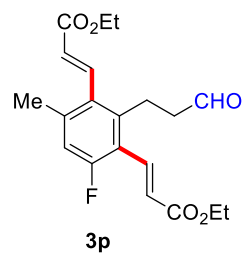

---110.969

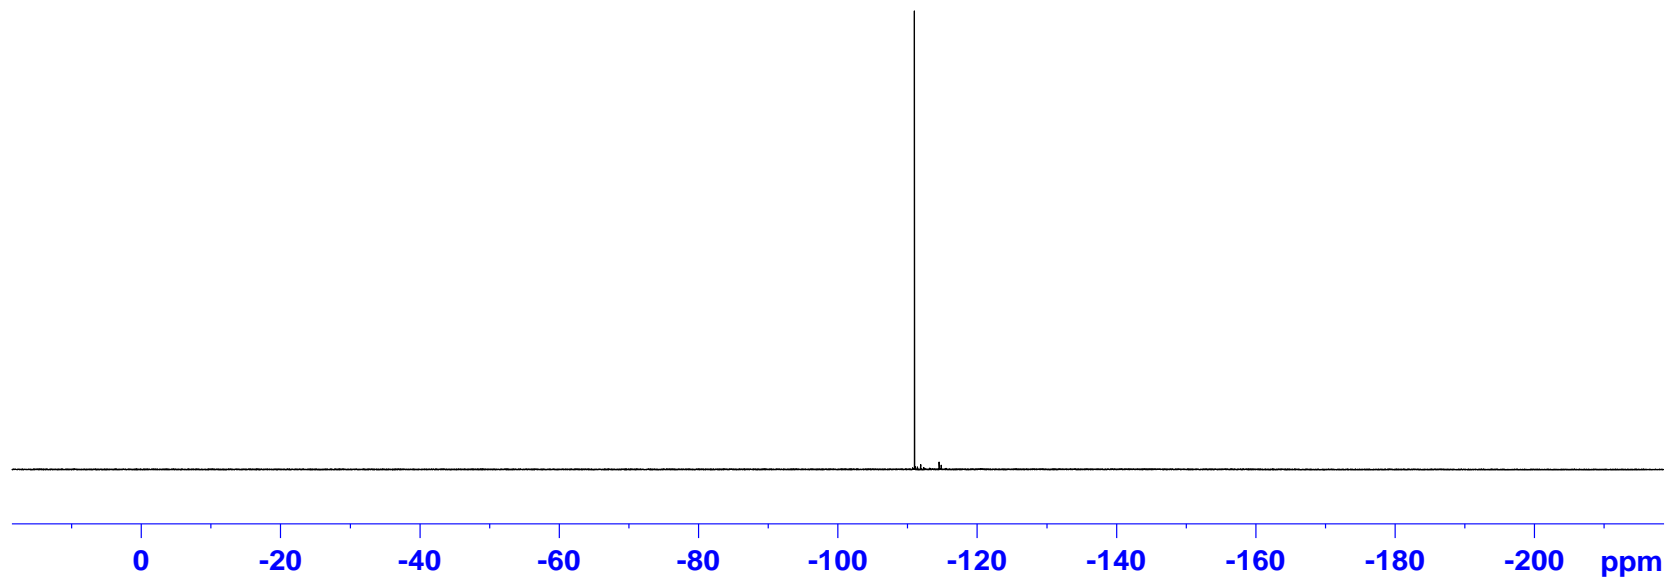

S283

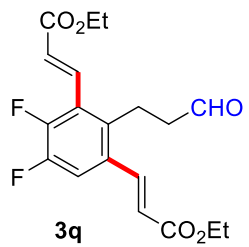

— 9.787  
 7.890  
 7.851  
 7.661  
 7.620  
 7.377  
 7.357  
 7.350  
 7.330  
 7.287  
 6.538  
 6.534  
 6.498  
 6.494  
 6.308  
 6.269  
 4.318  
 4.300  
 4.286  
 4.283  
 4.268  
 4.250  
 3.161  
 3.142  
 3.122  
 2.682  
 2.661  
 2.642  
 1.371  
 1.361  
 1.353  
 1.343  
 1.335  
 1.326

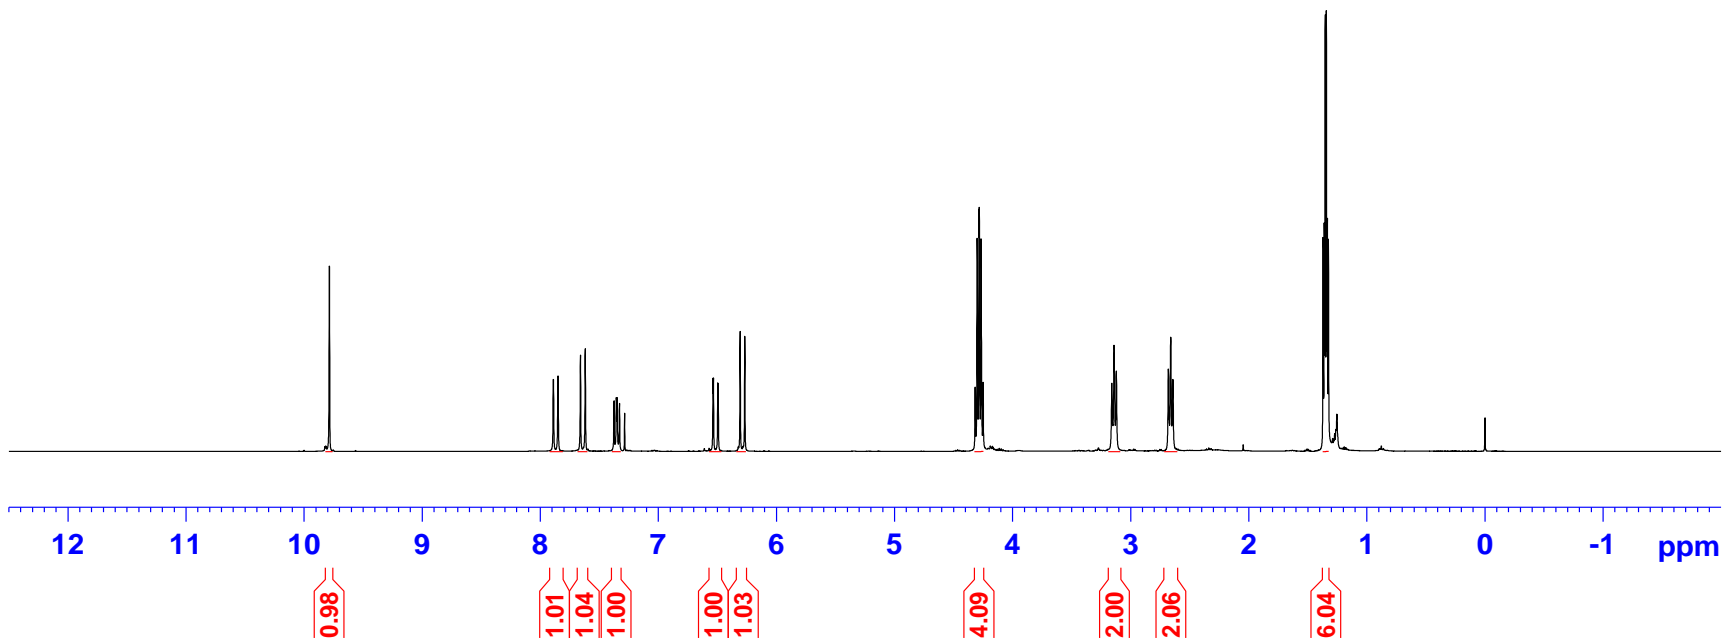

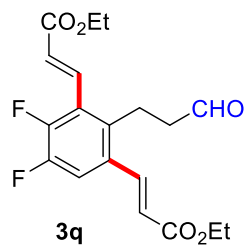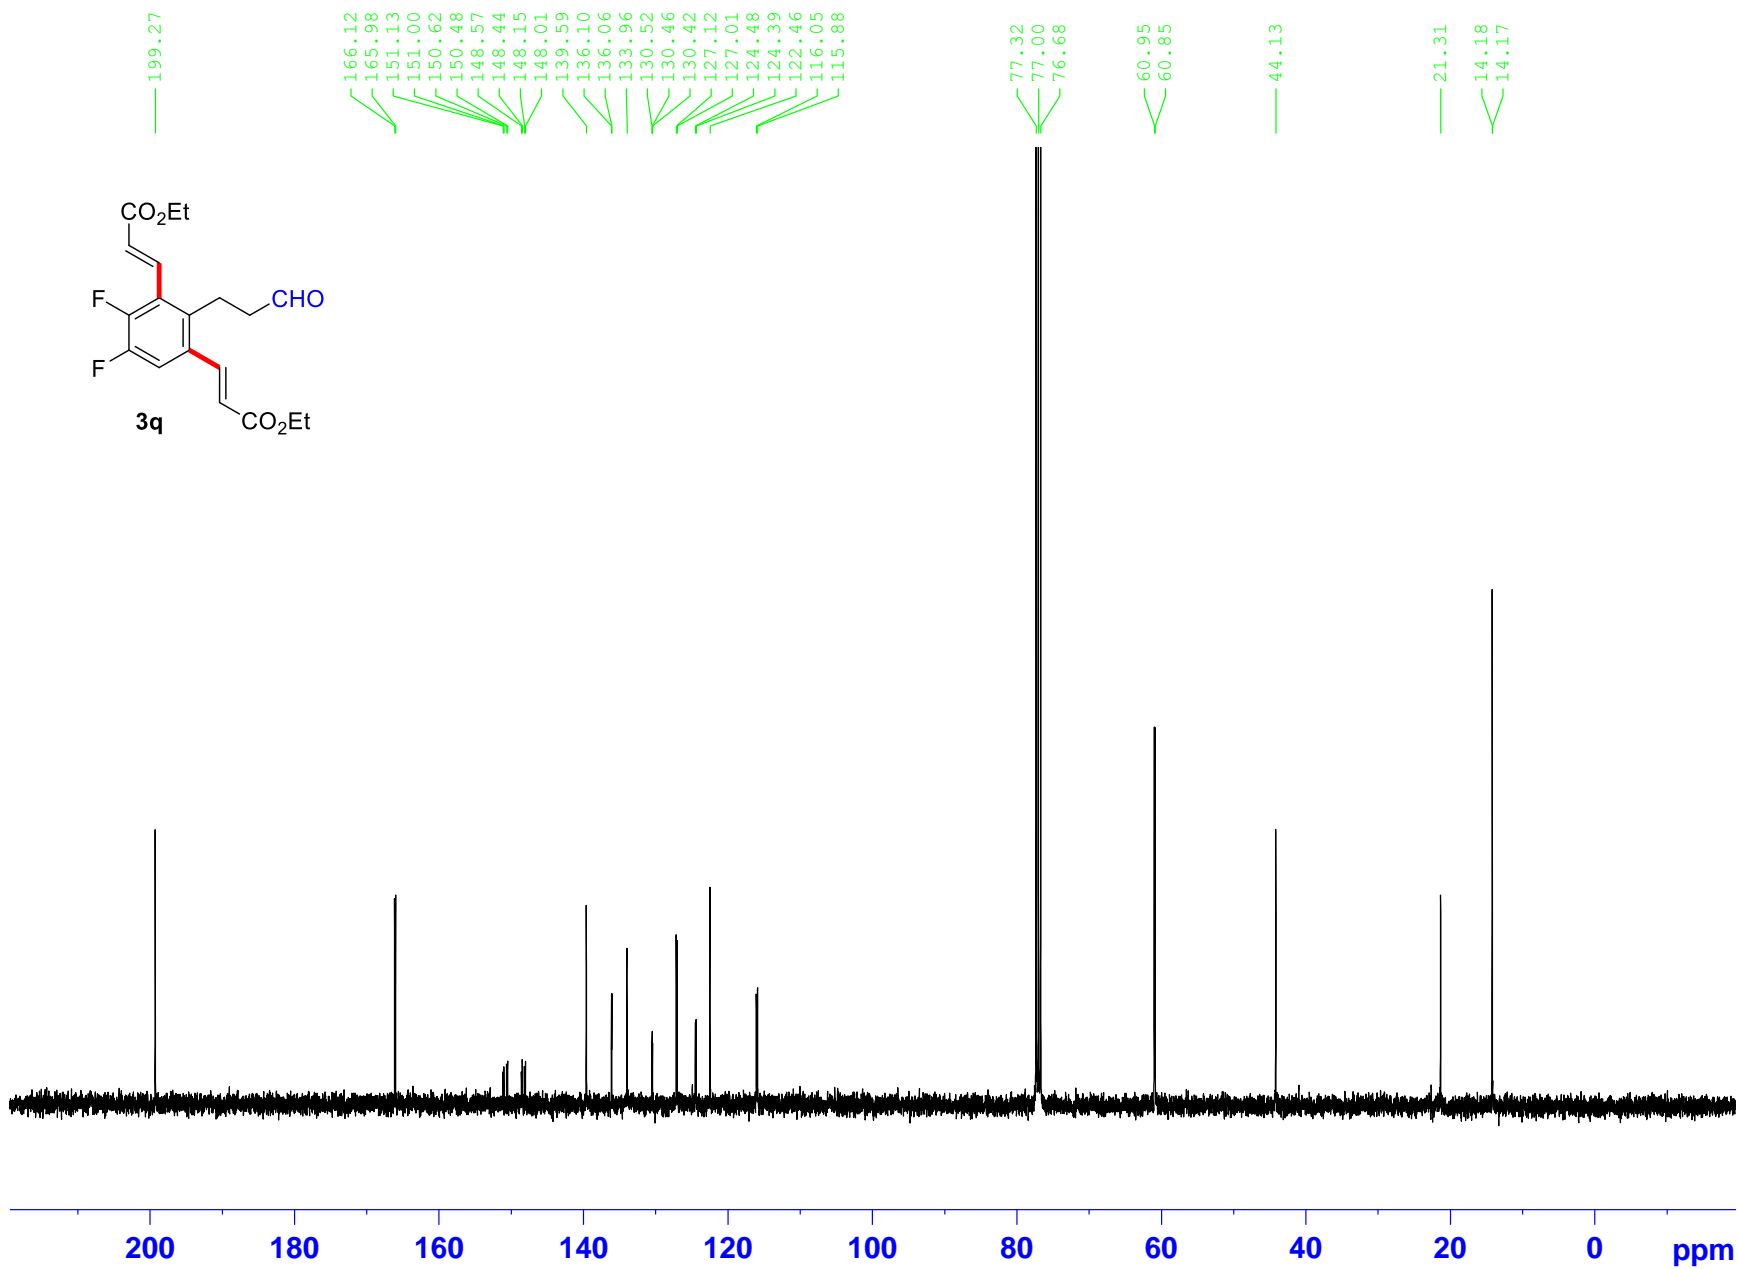

S285

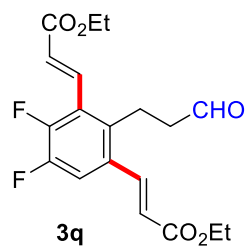

-133.621  
-133.678  
-138.242  
-138.297

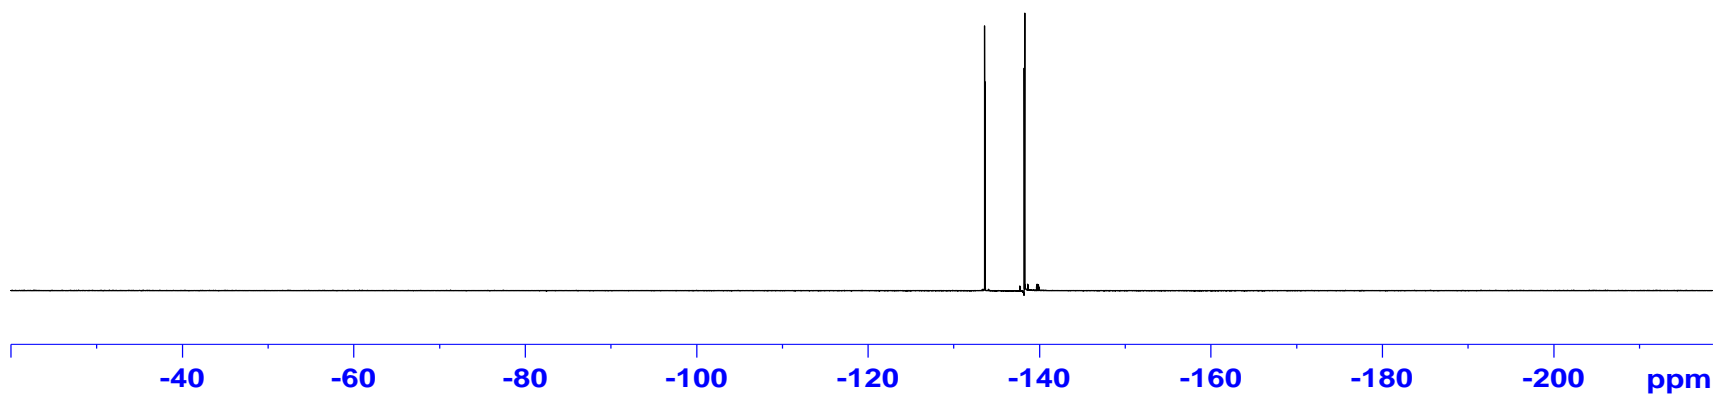

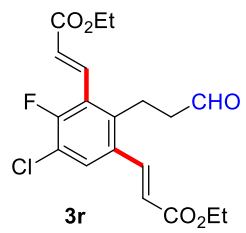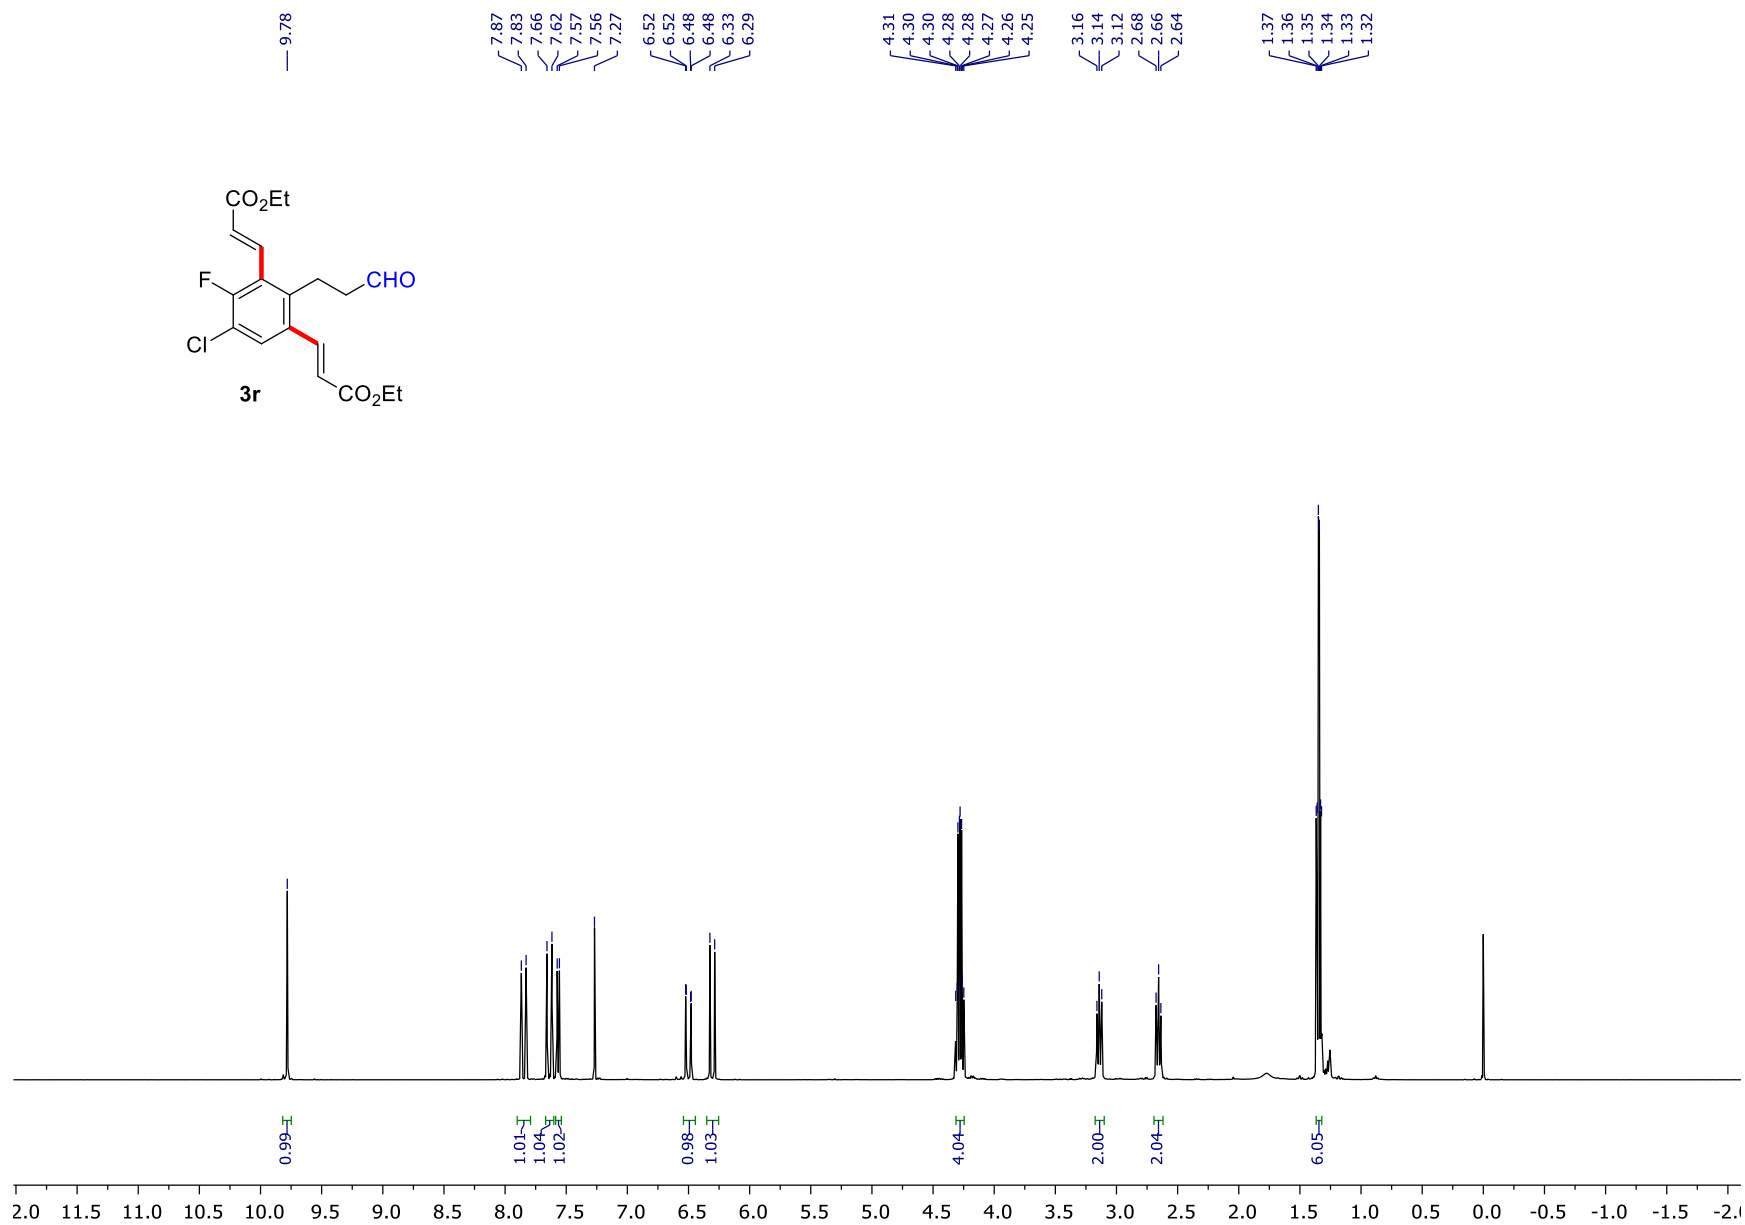

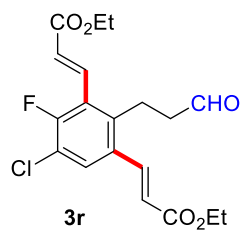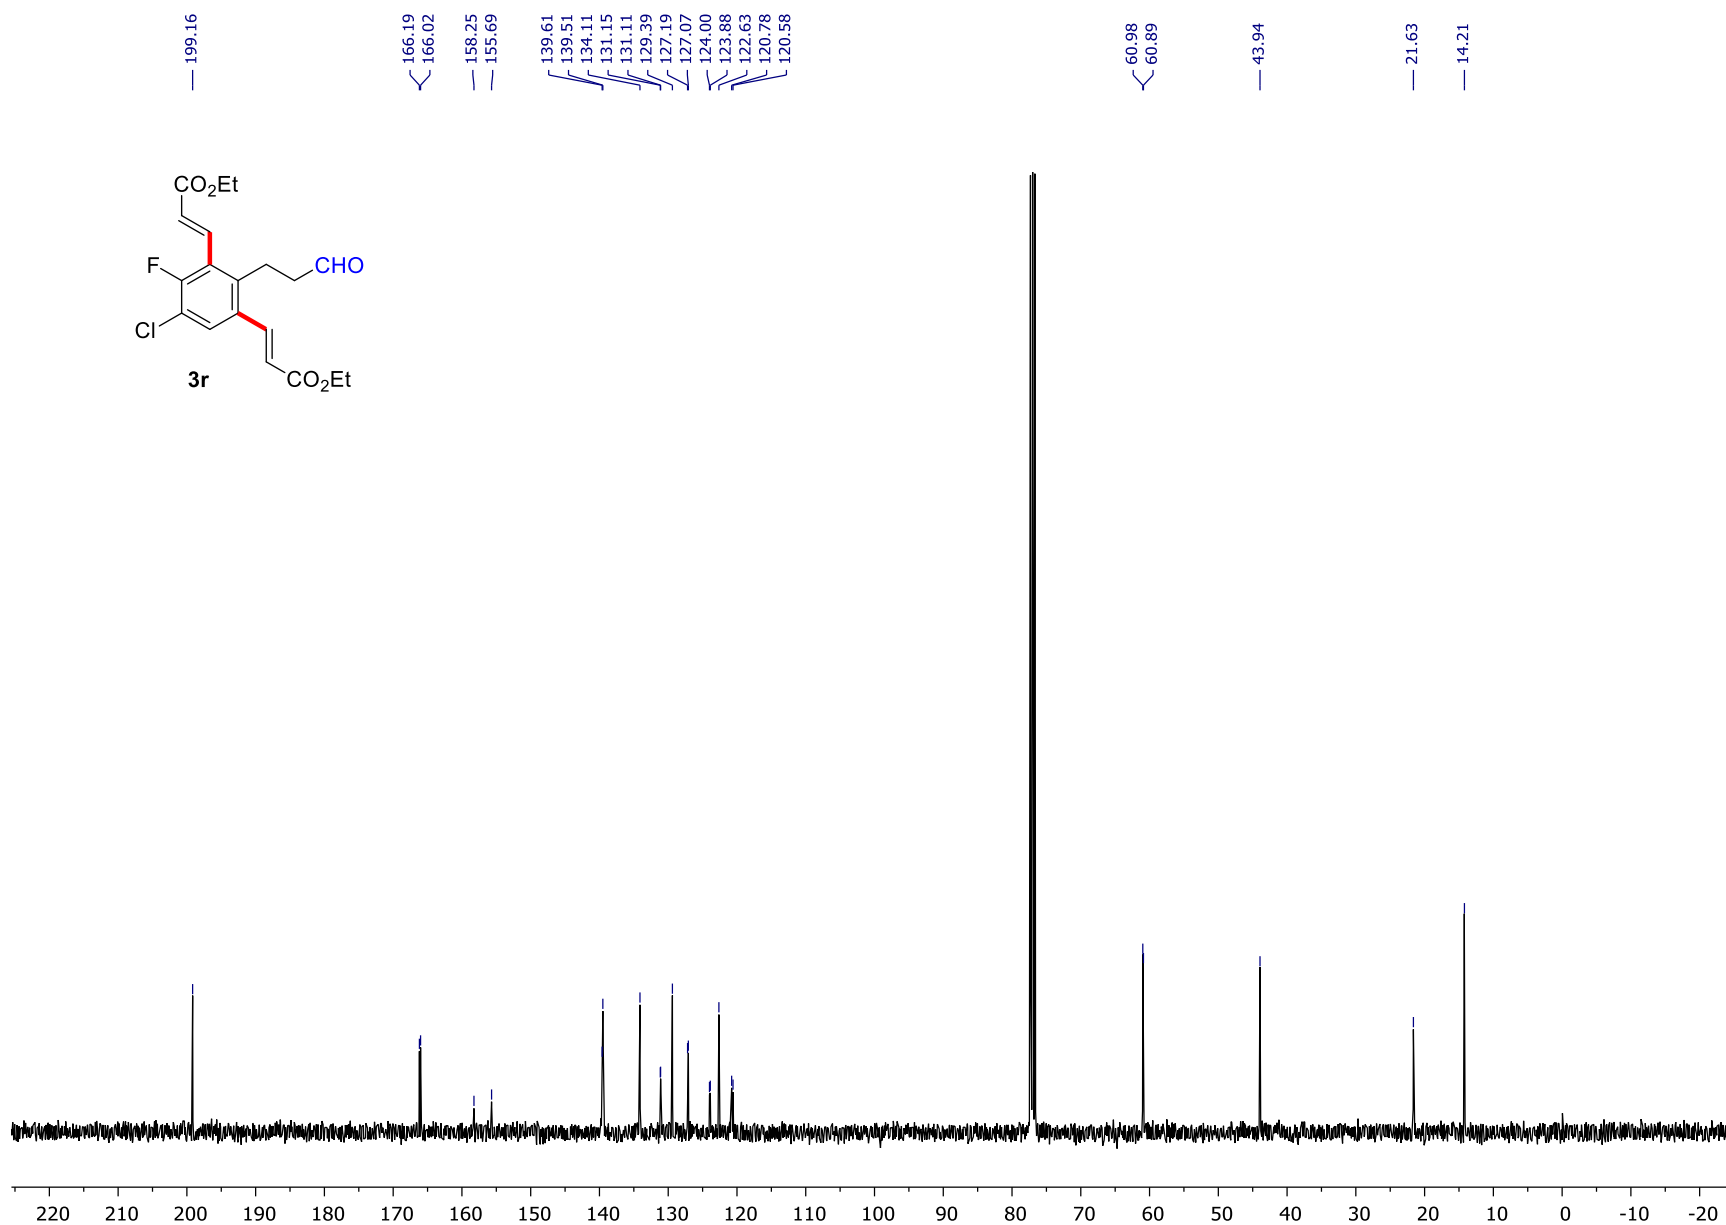



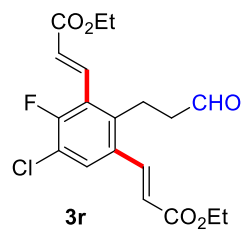

—110.32

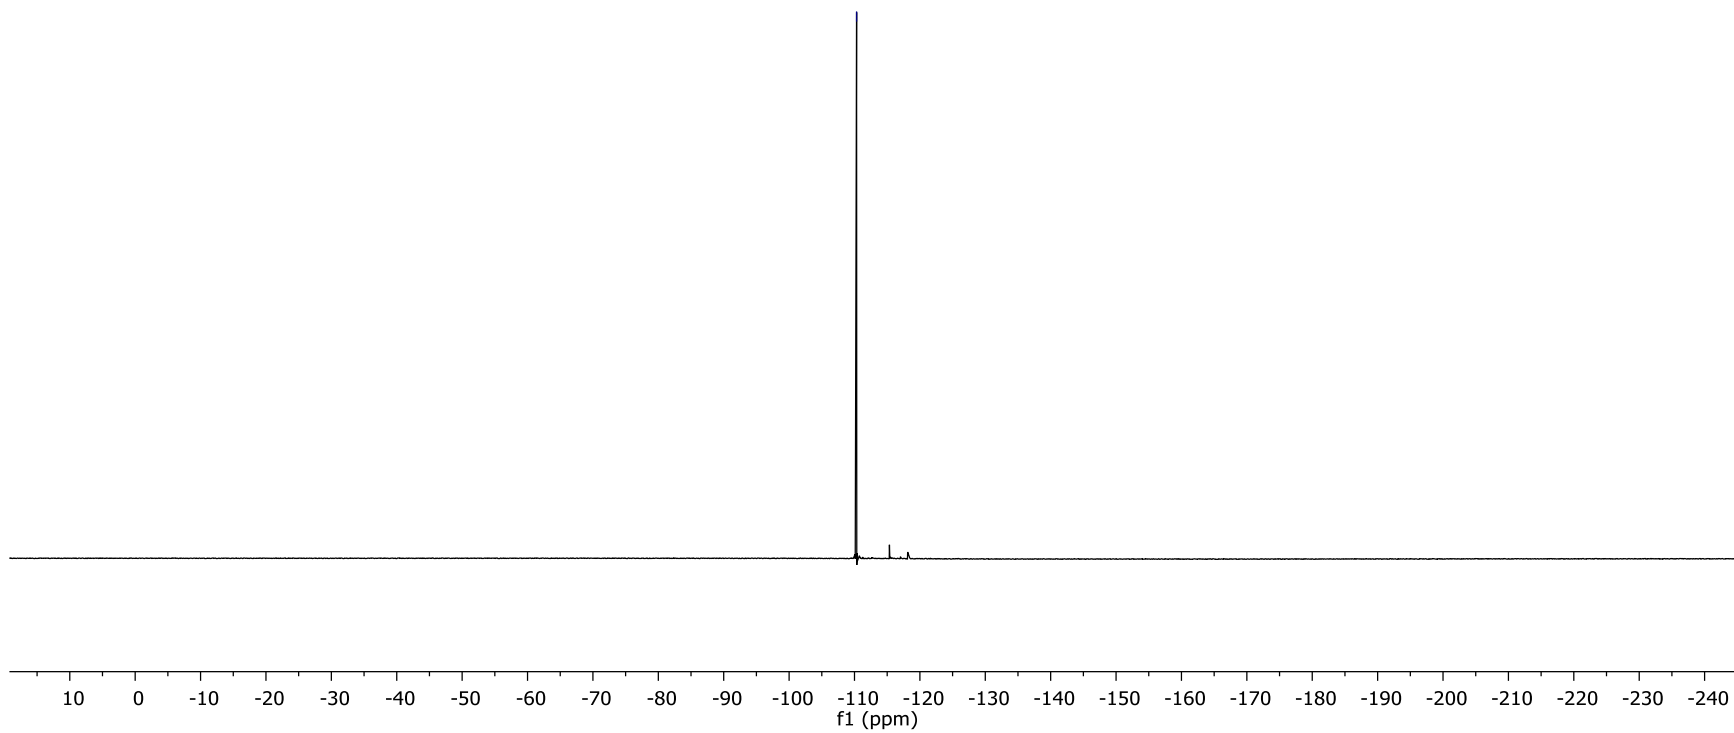

S289

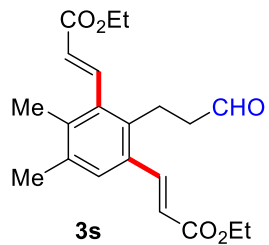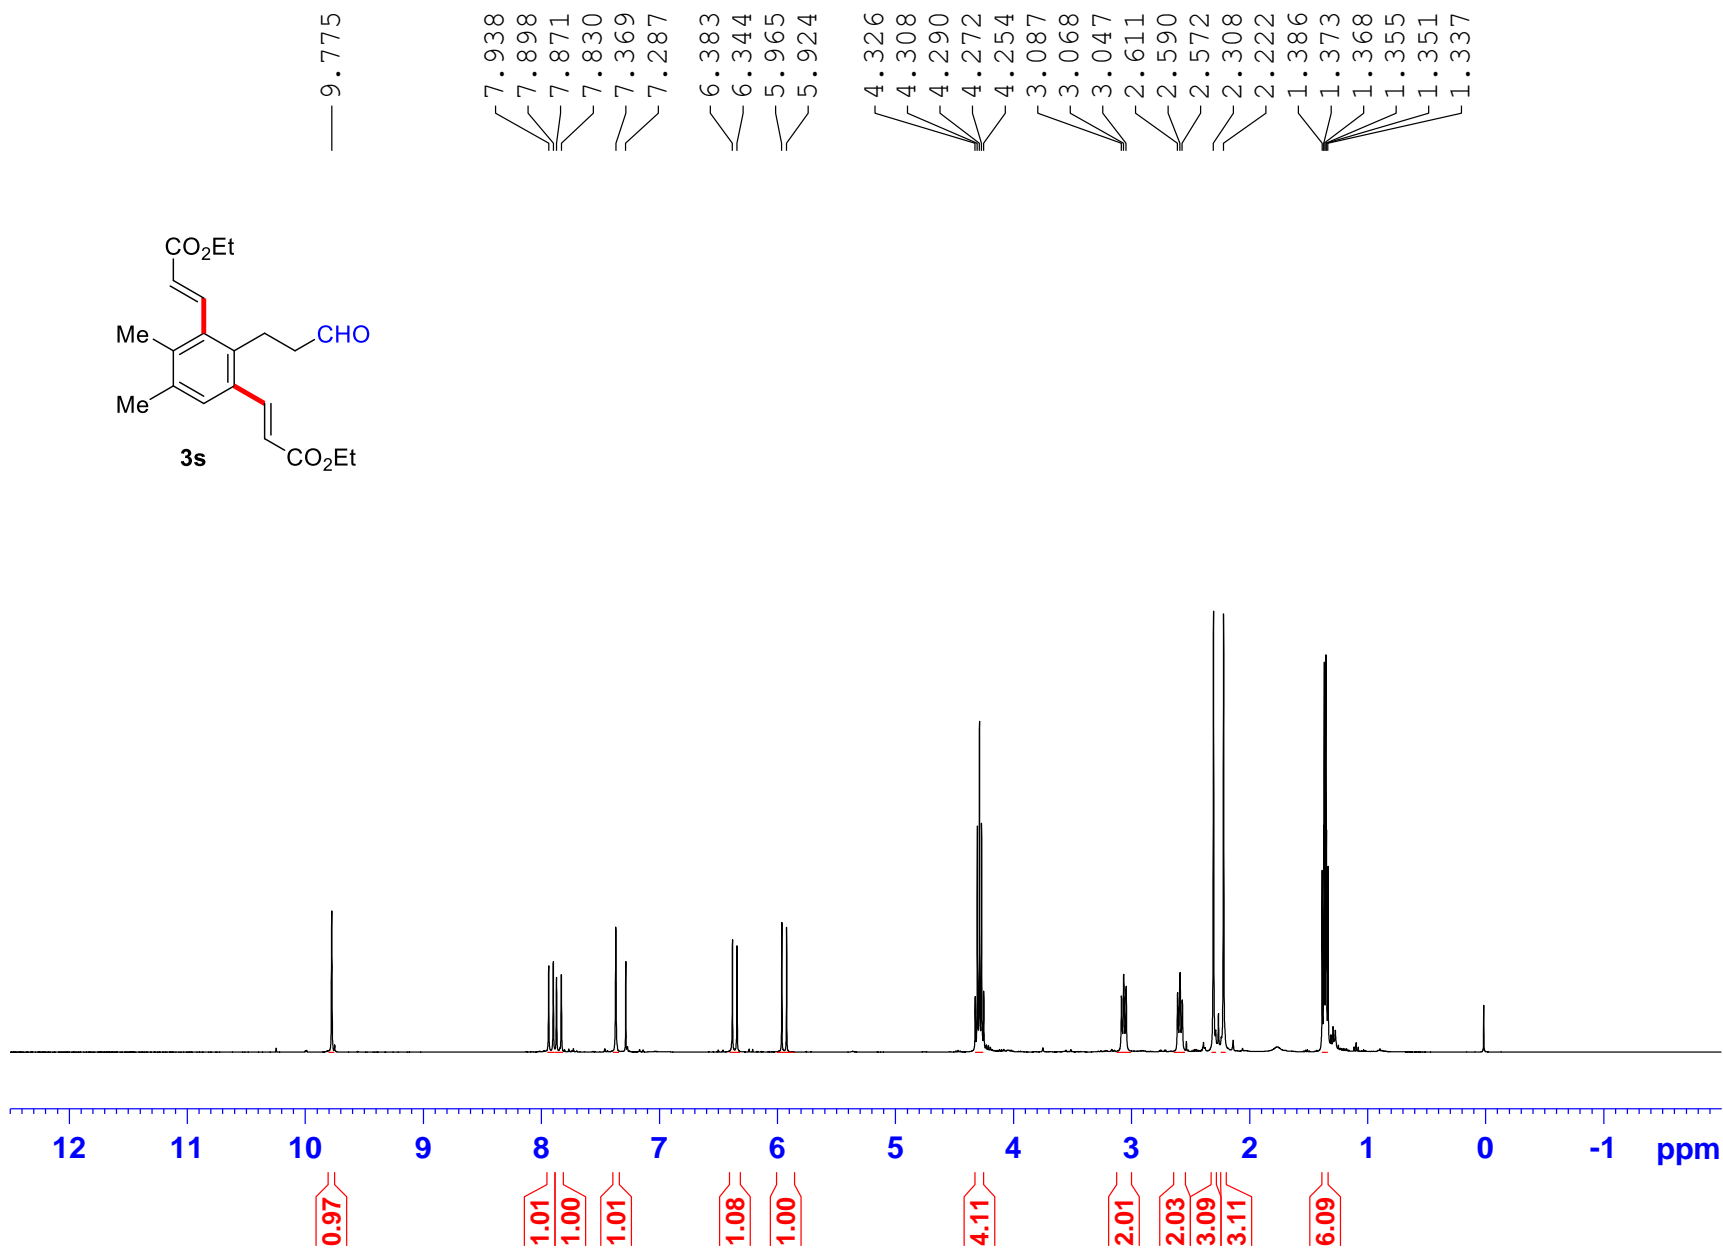

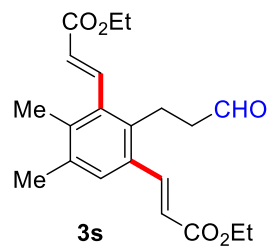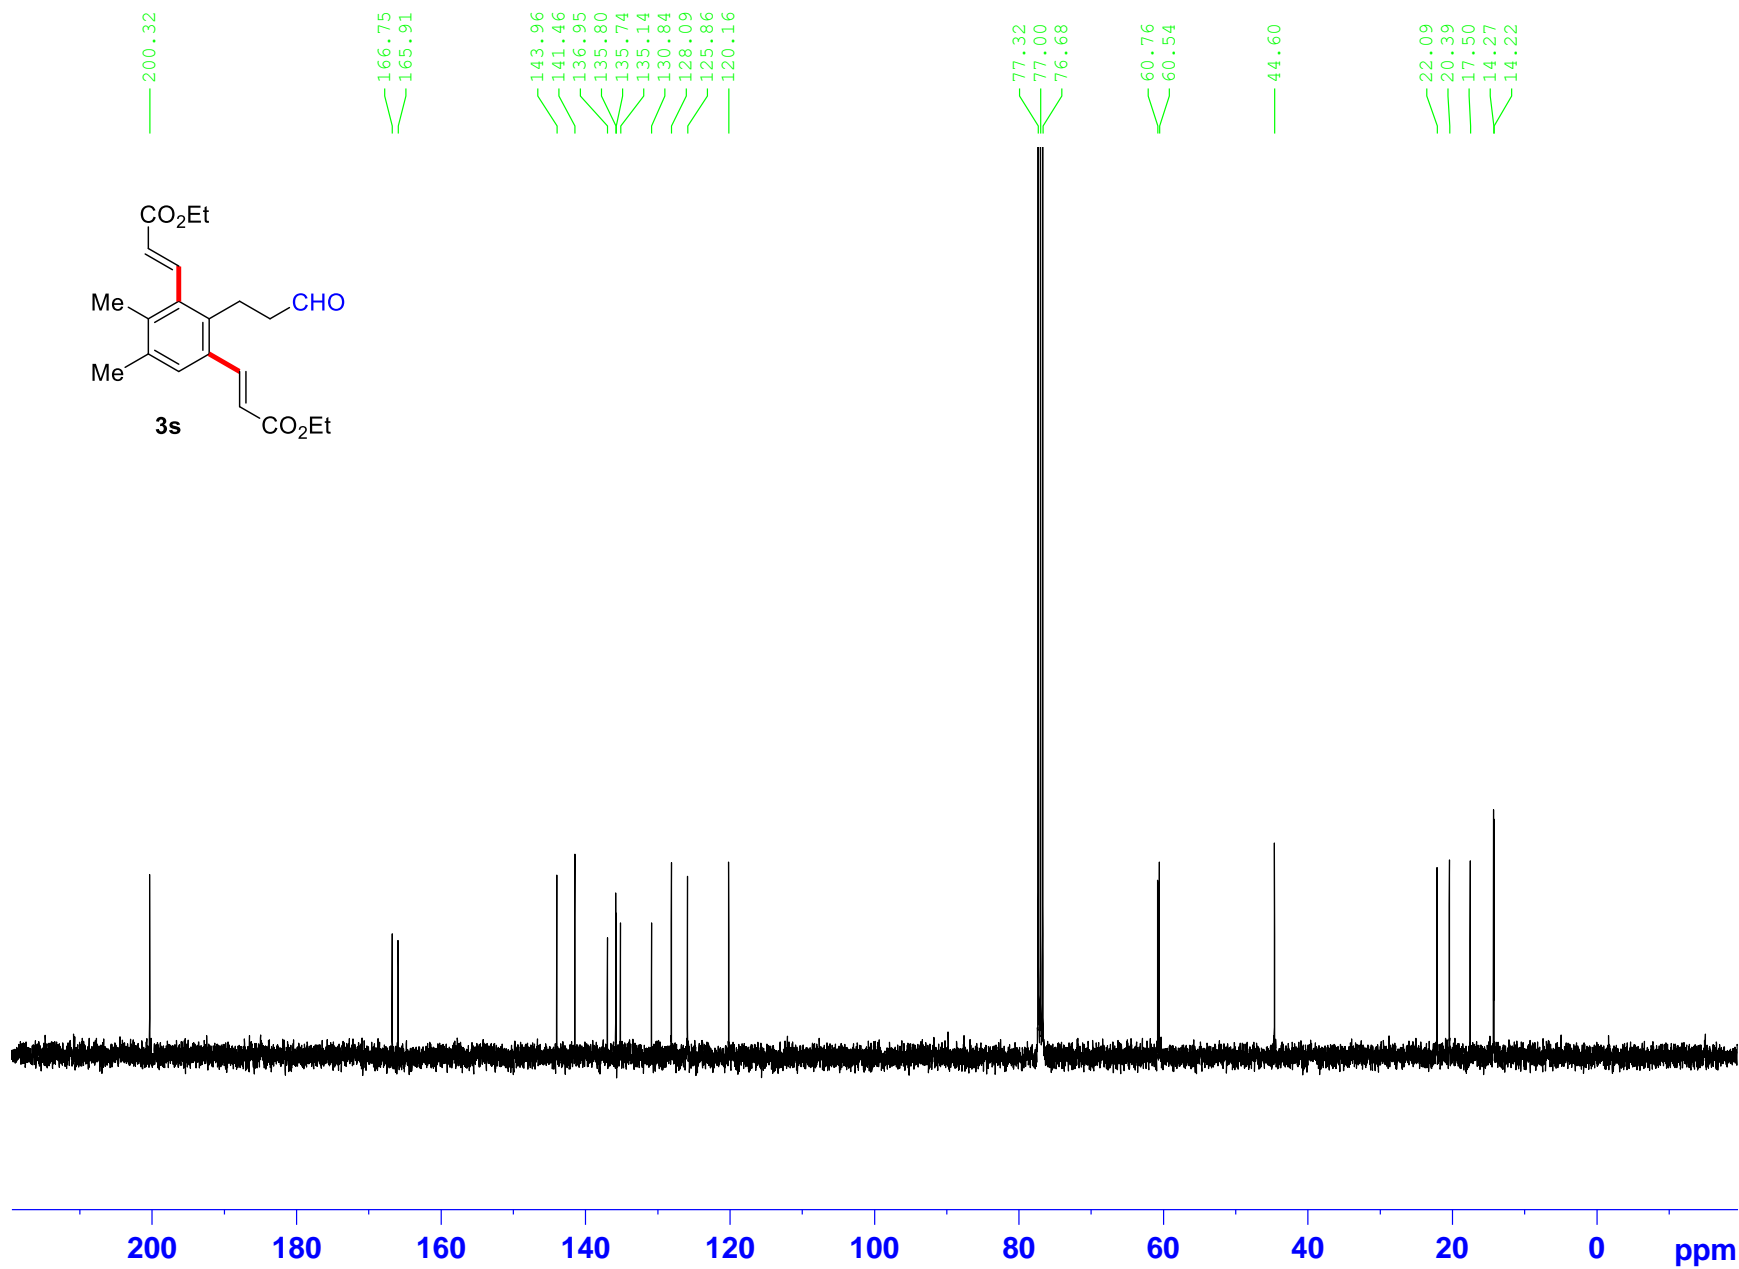

S291

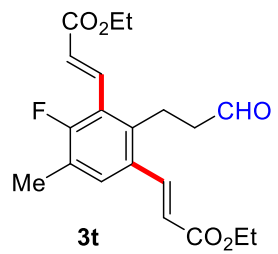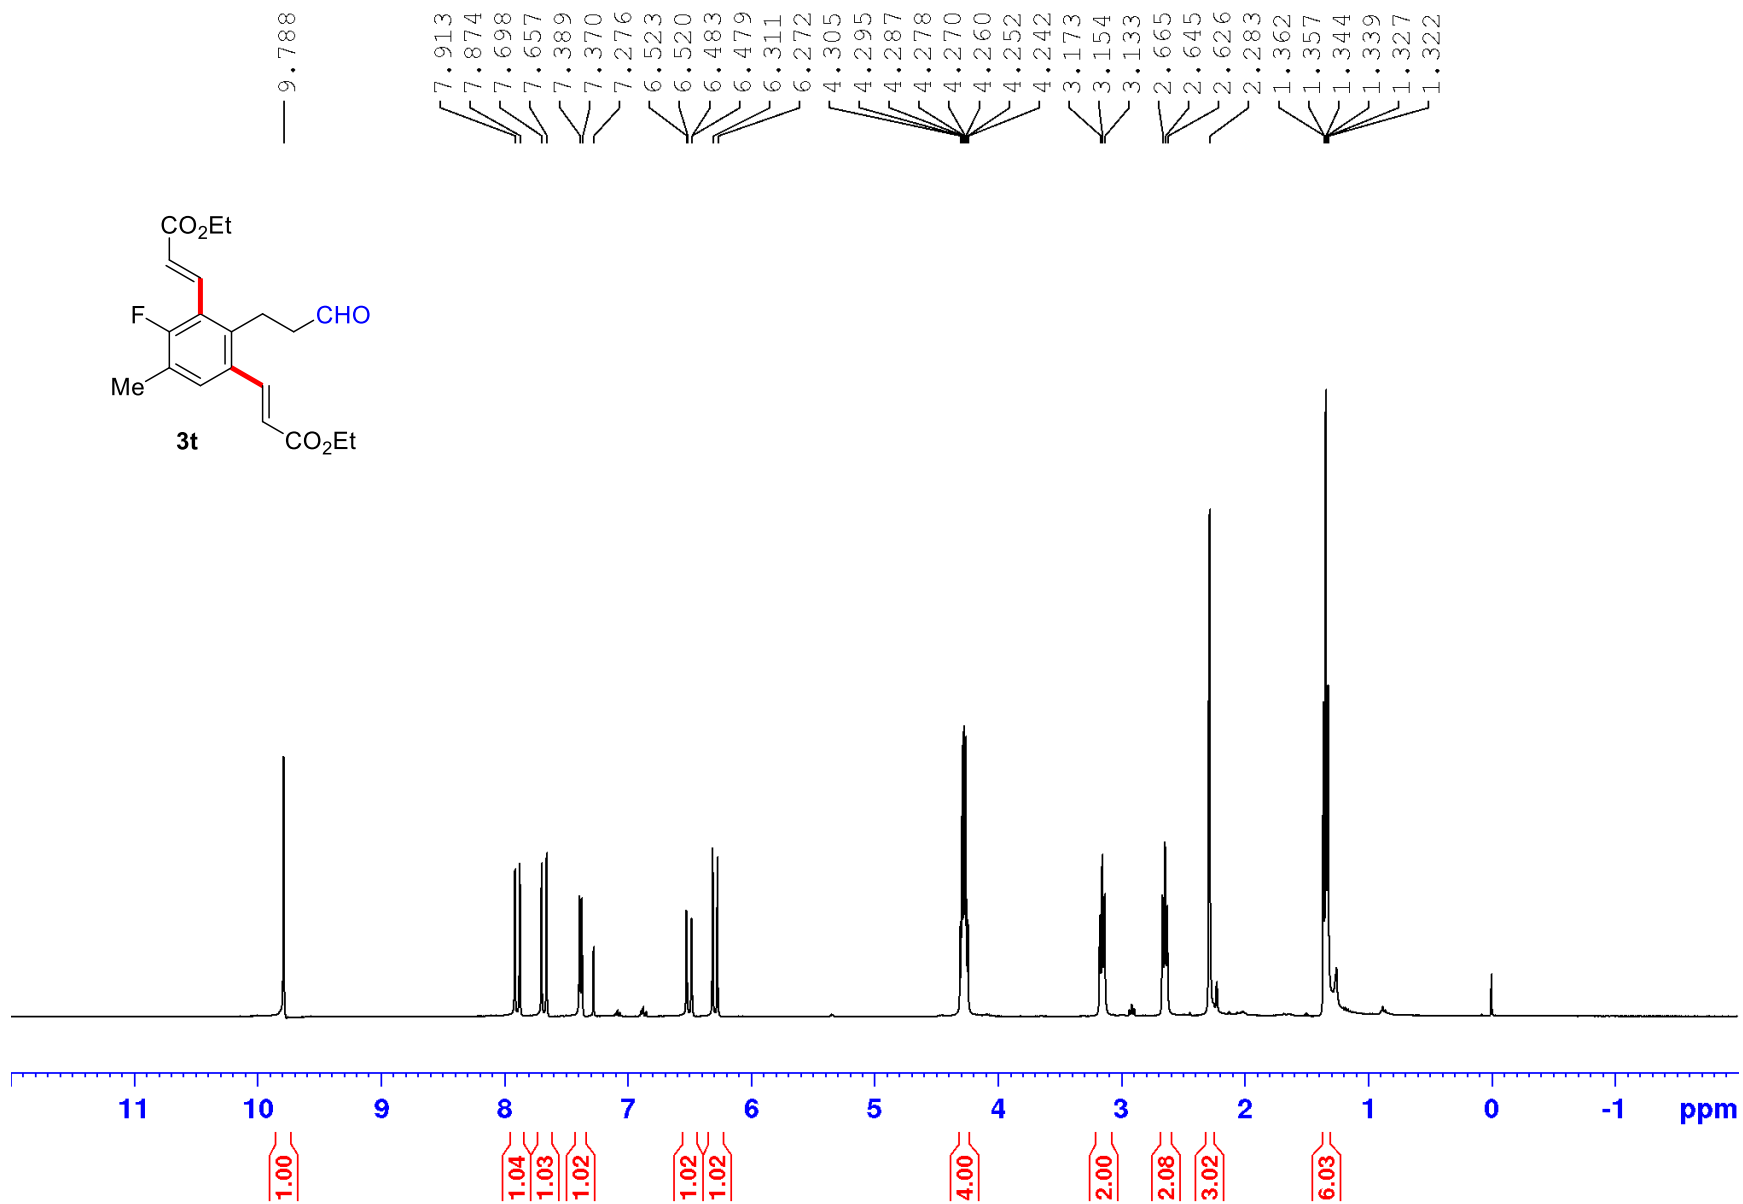

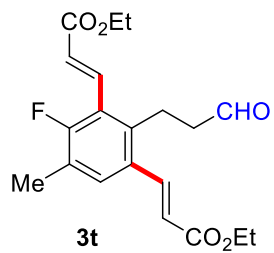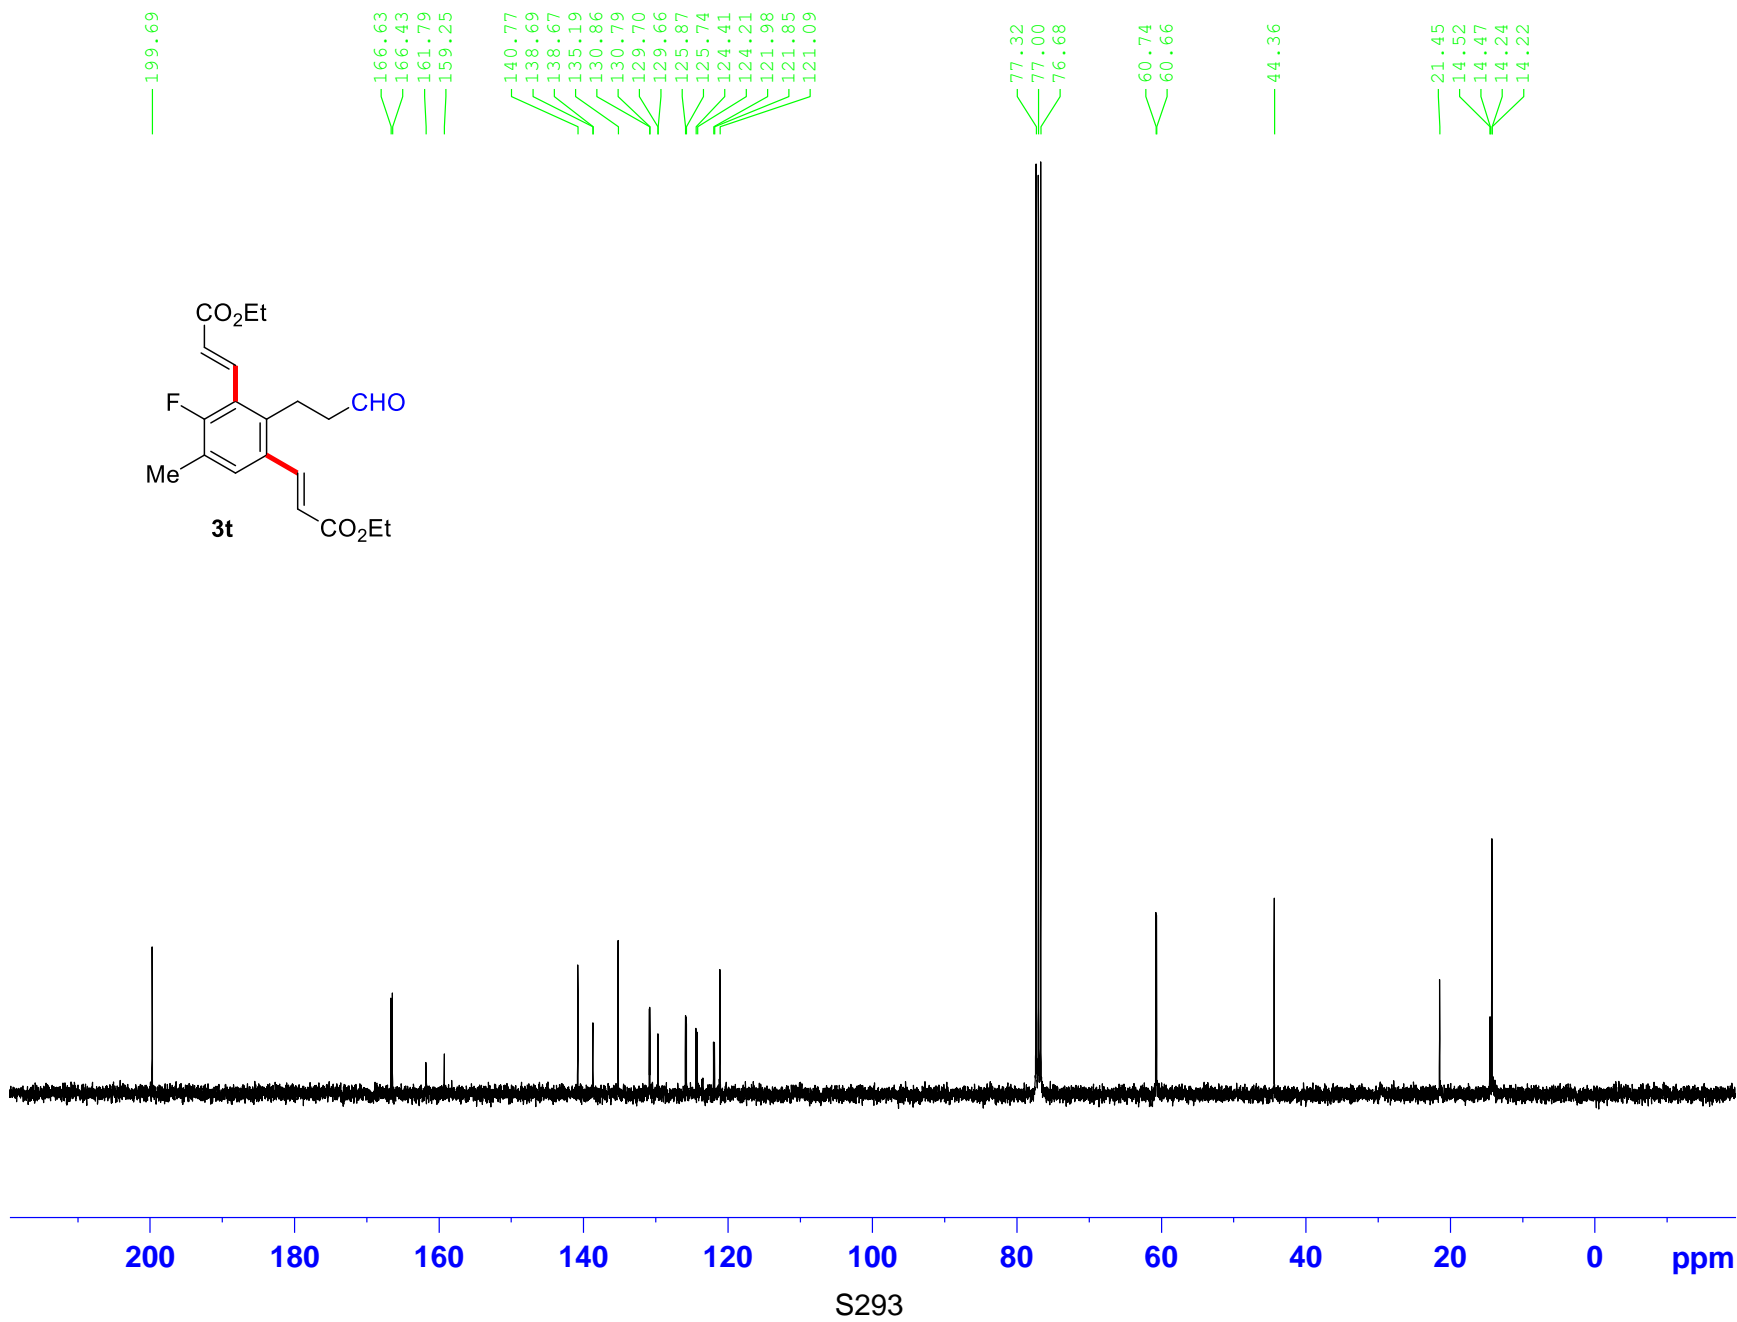

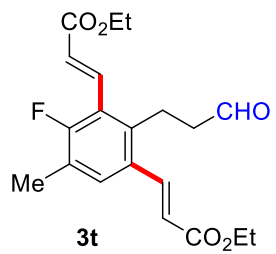

—111.447

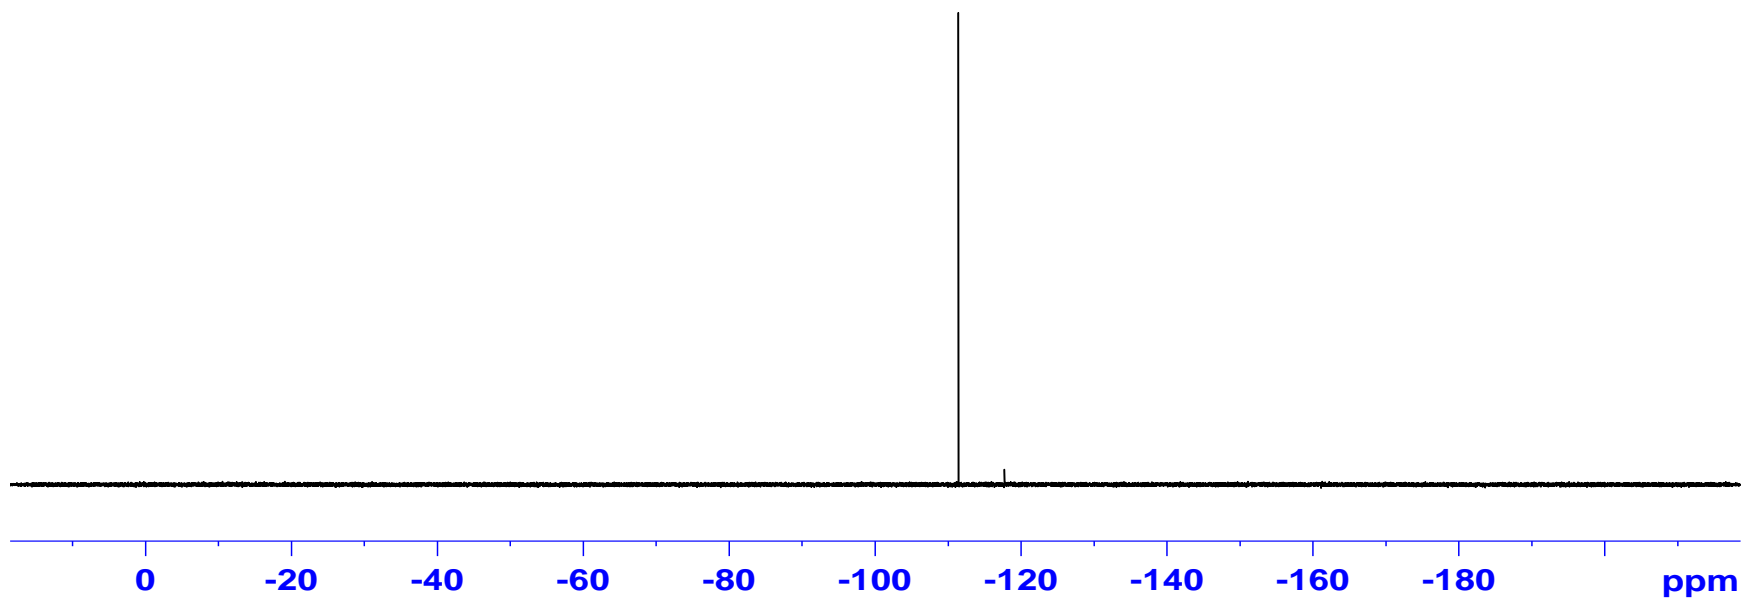

S294

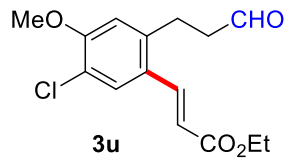

— 9.801

7.819  
7.780  
7.596  
7.270  
— 6.792  
6.312  
6.273

4.289  
4.271  
4.254  
4.236  
3.920  
3.091  
3.072  
3.054  
2.777  
2.759  
2.740

1.353  
1.335  
1.317

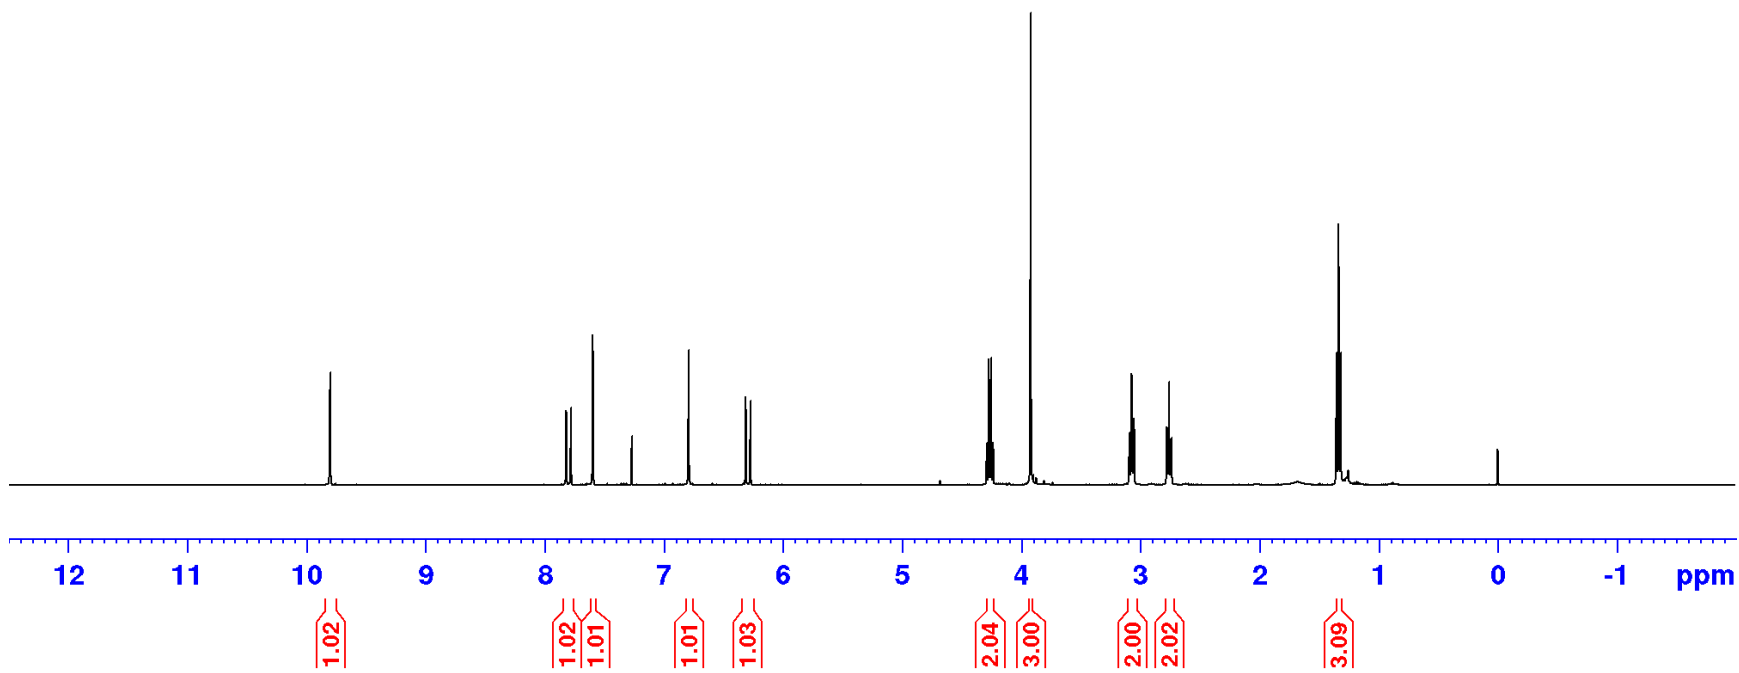

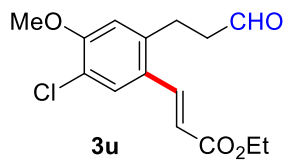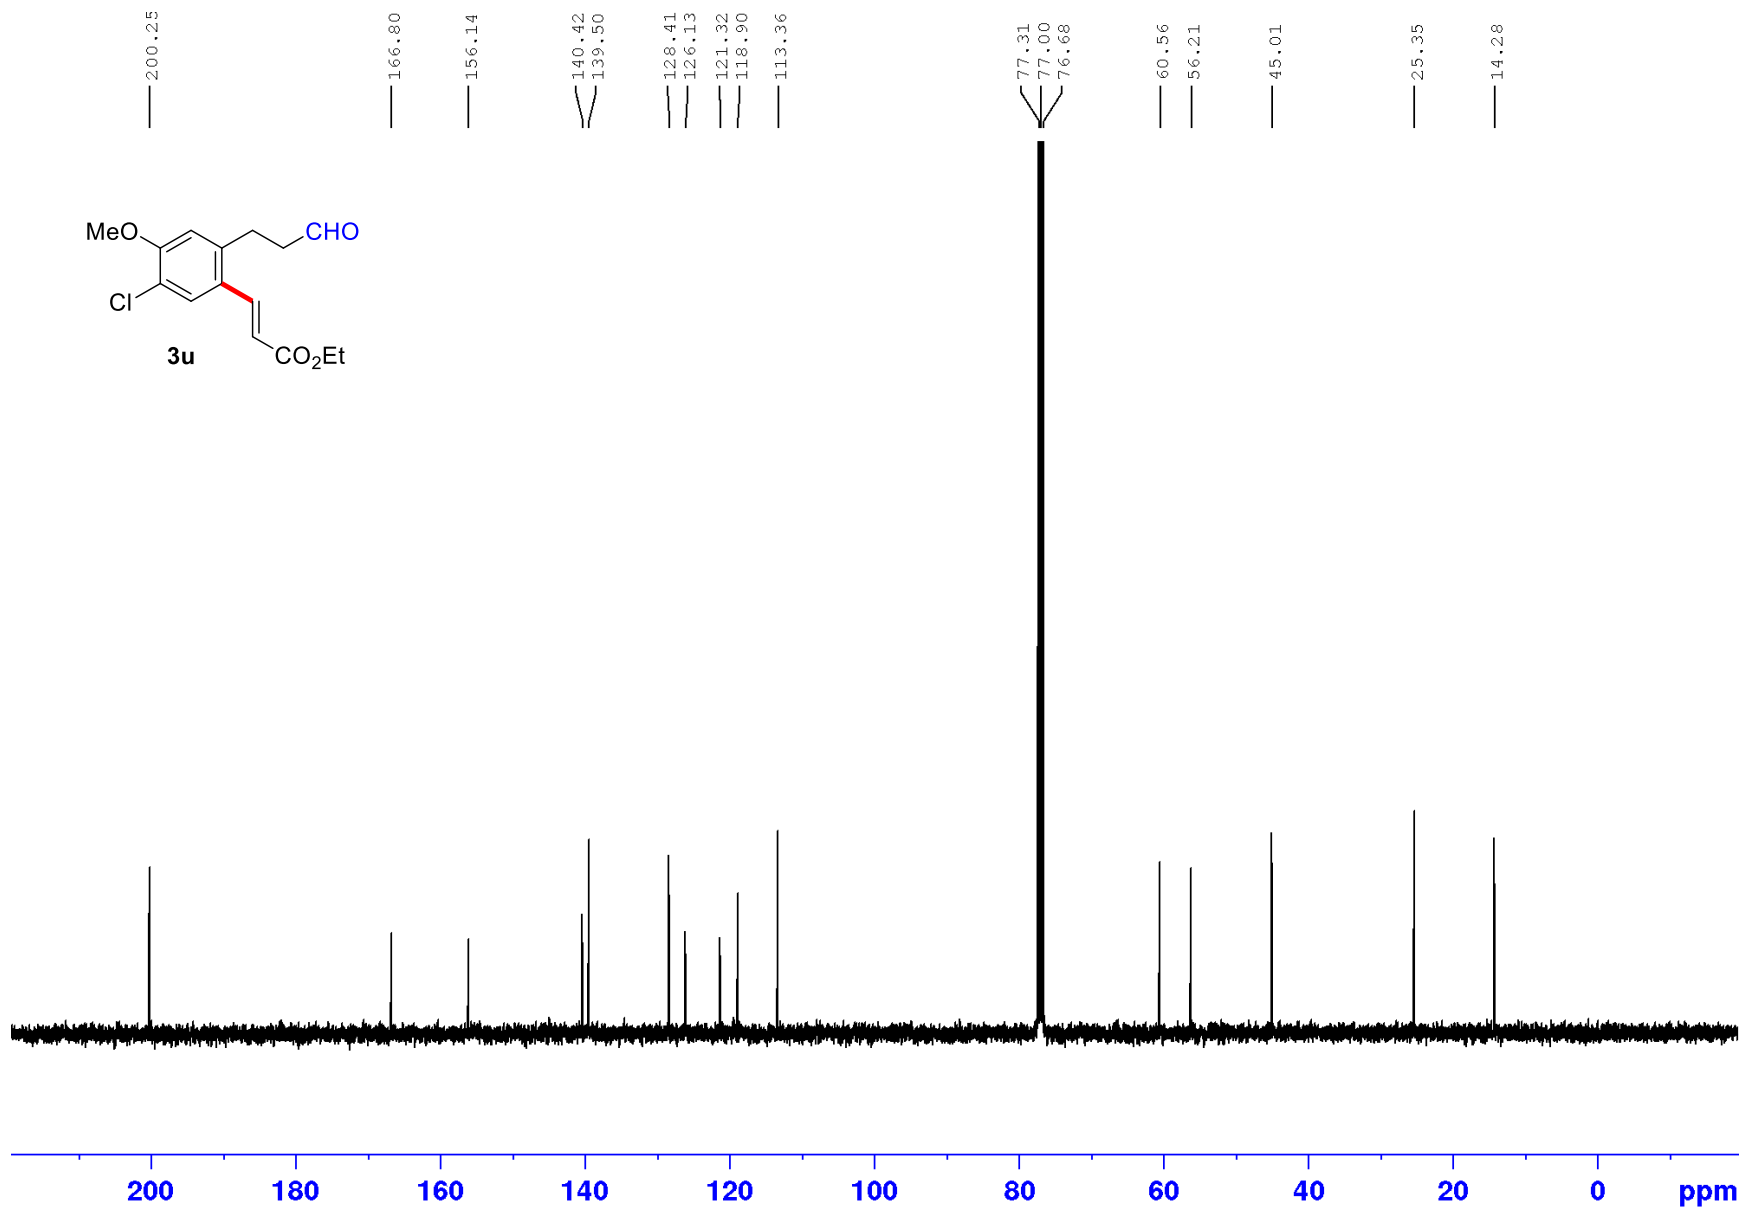



9.802  
8.155  
8.114  
8.063  
8.032  
8.024  
7.968  
7.960  
7.954  
7.946  
7.937  
7.850  
7.840  
7.833  
7.827  
7.520  
7.514  
7.505  
7.495  
7.491  
7.265  
6.522  
6.483  
6.193  
6.152  
4.362  
4.345  
4.327  
4.309  
4.291  
4.273  
3.269  
3.250  
3.230  
2.700  
2.680  
2.660  
1.404  
1.386  
1.382  
1.368  
1.364  
1.346

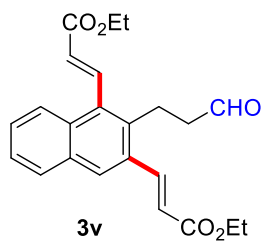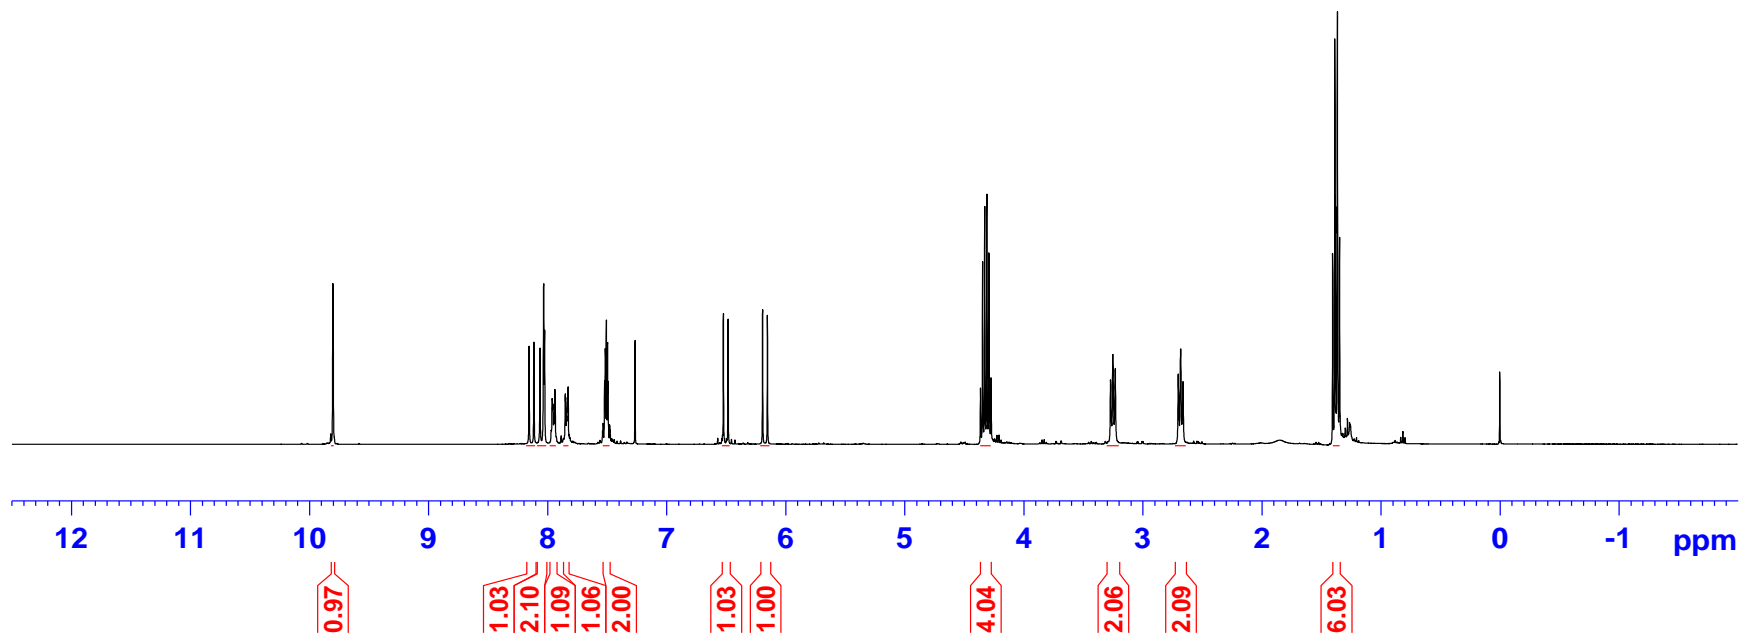

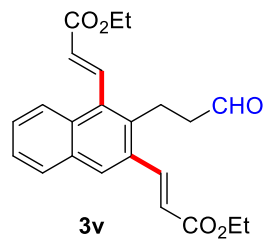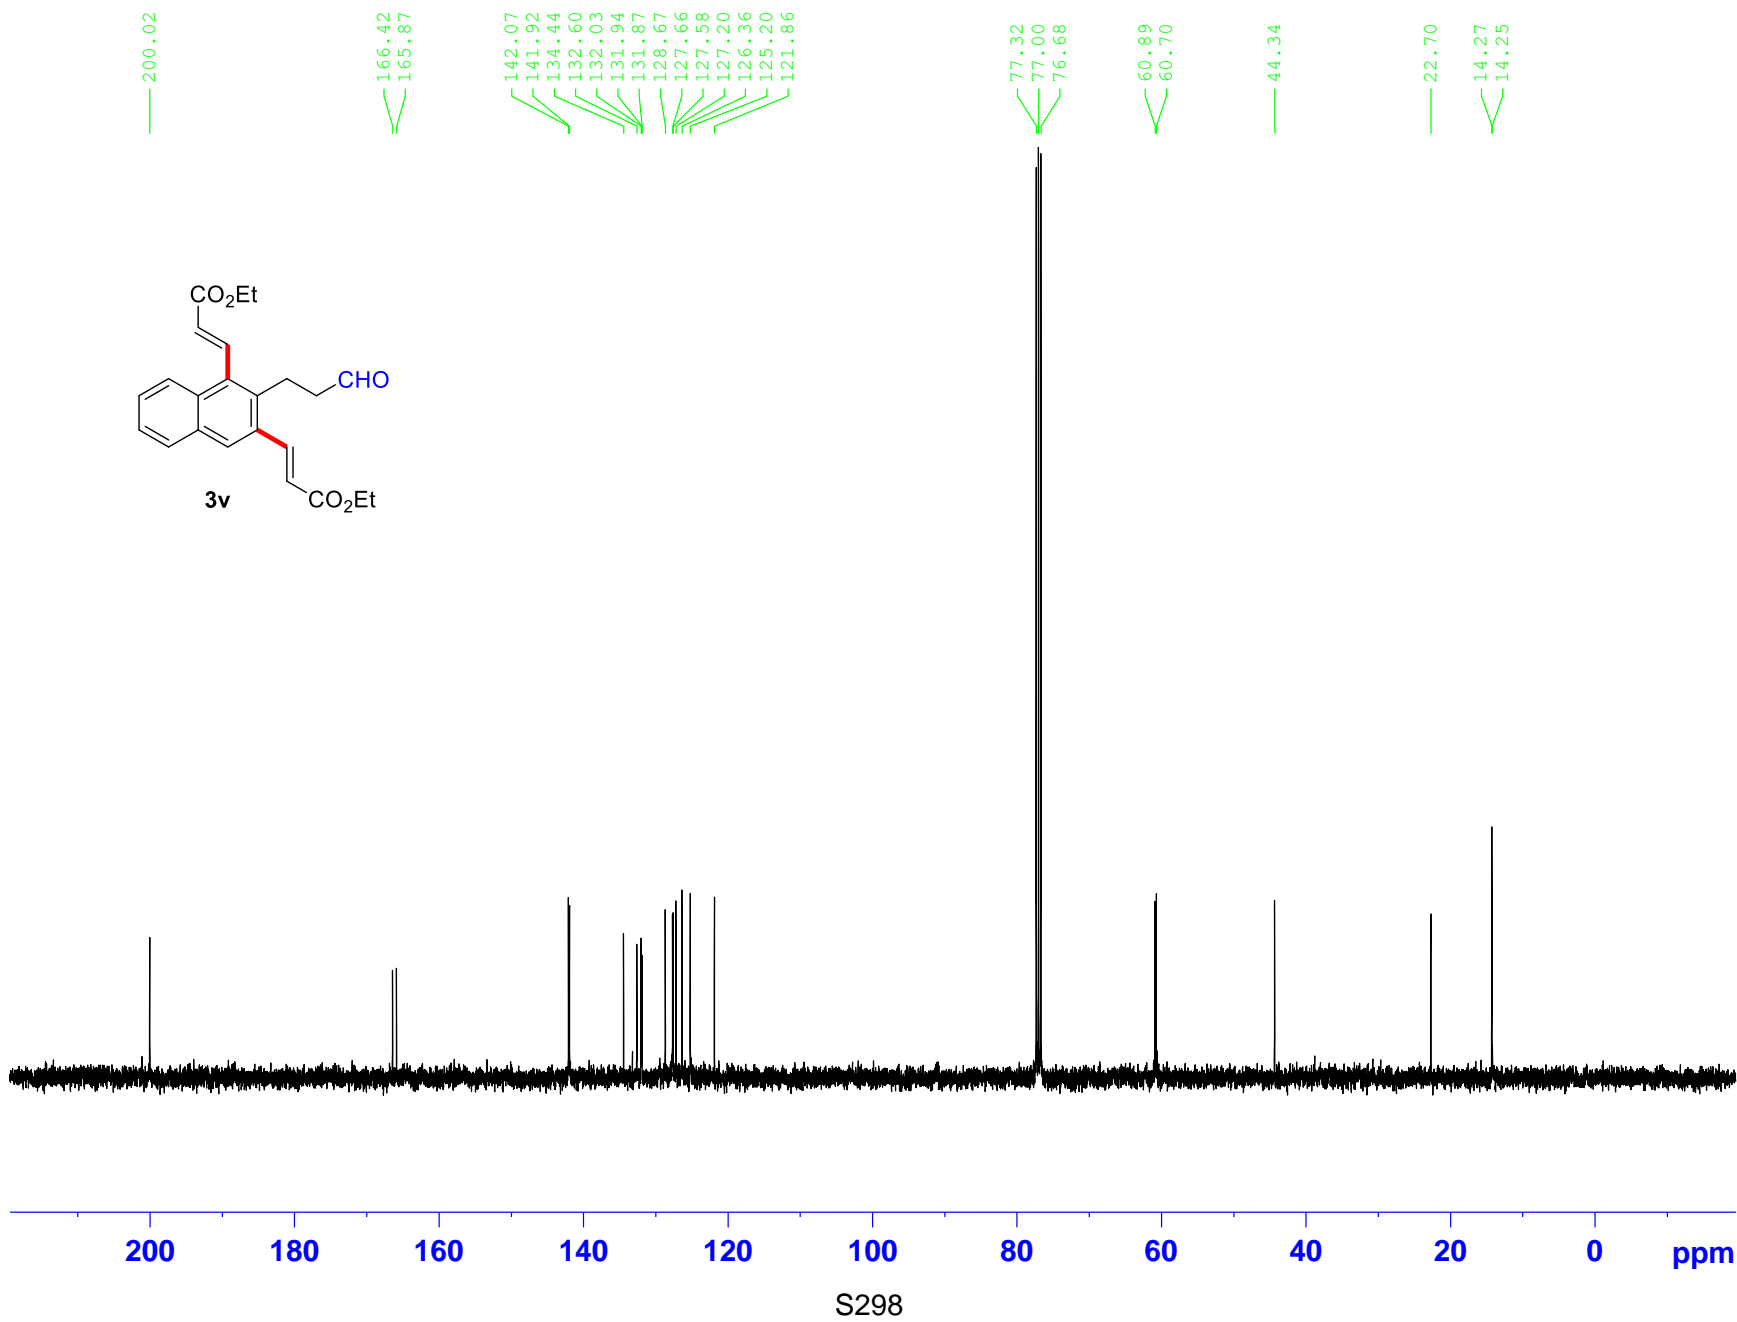

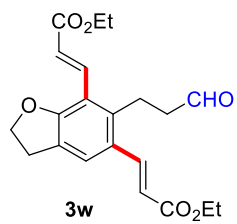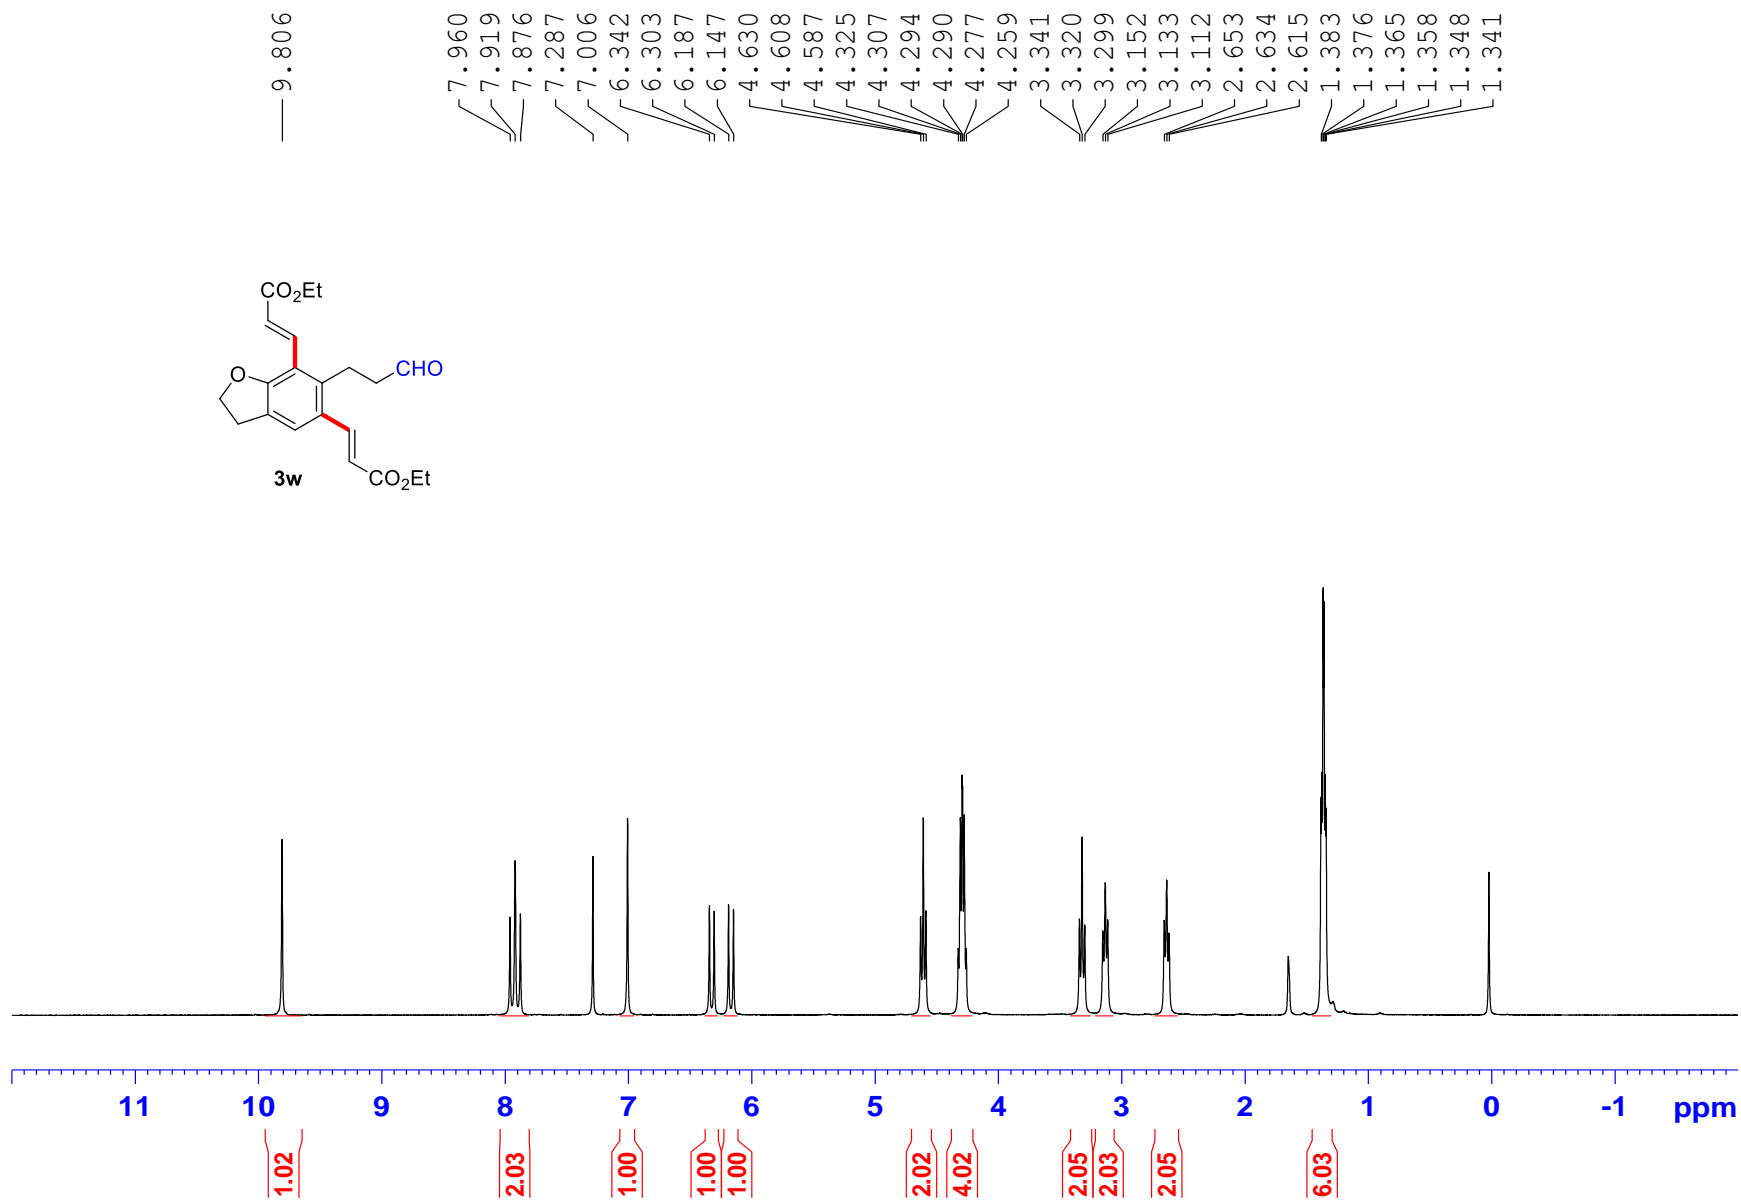

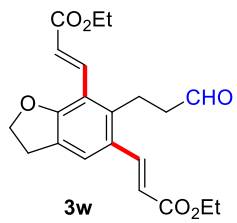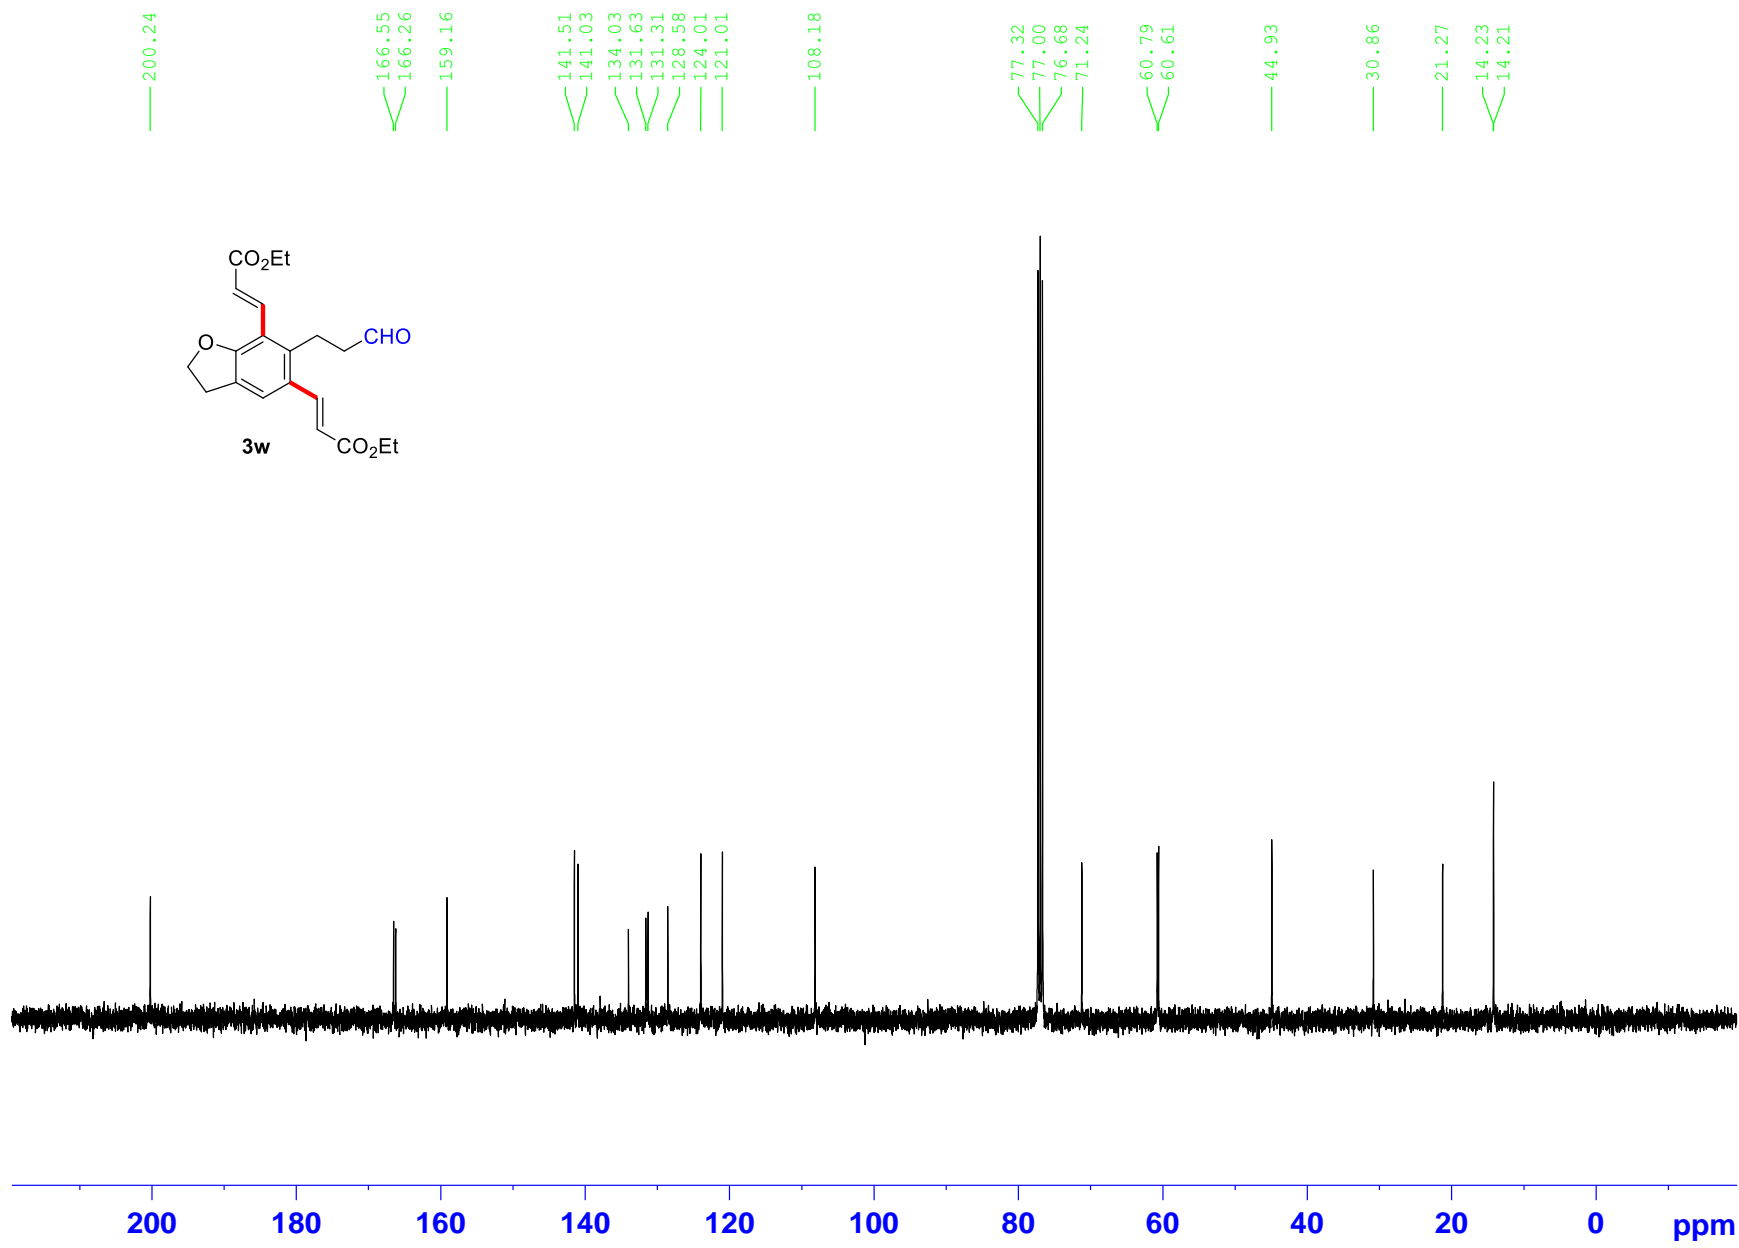

S300

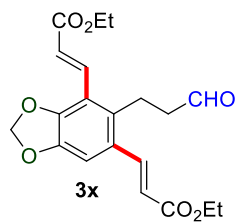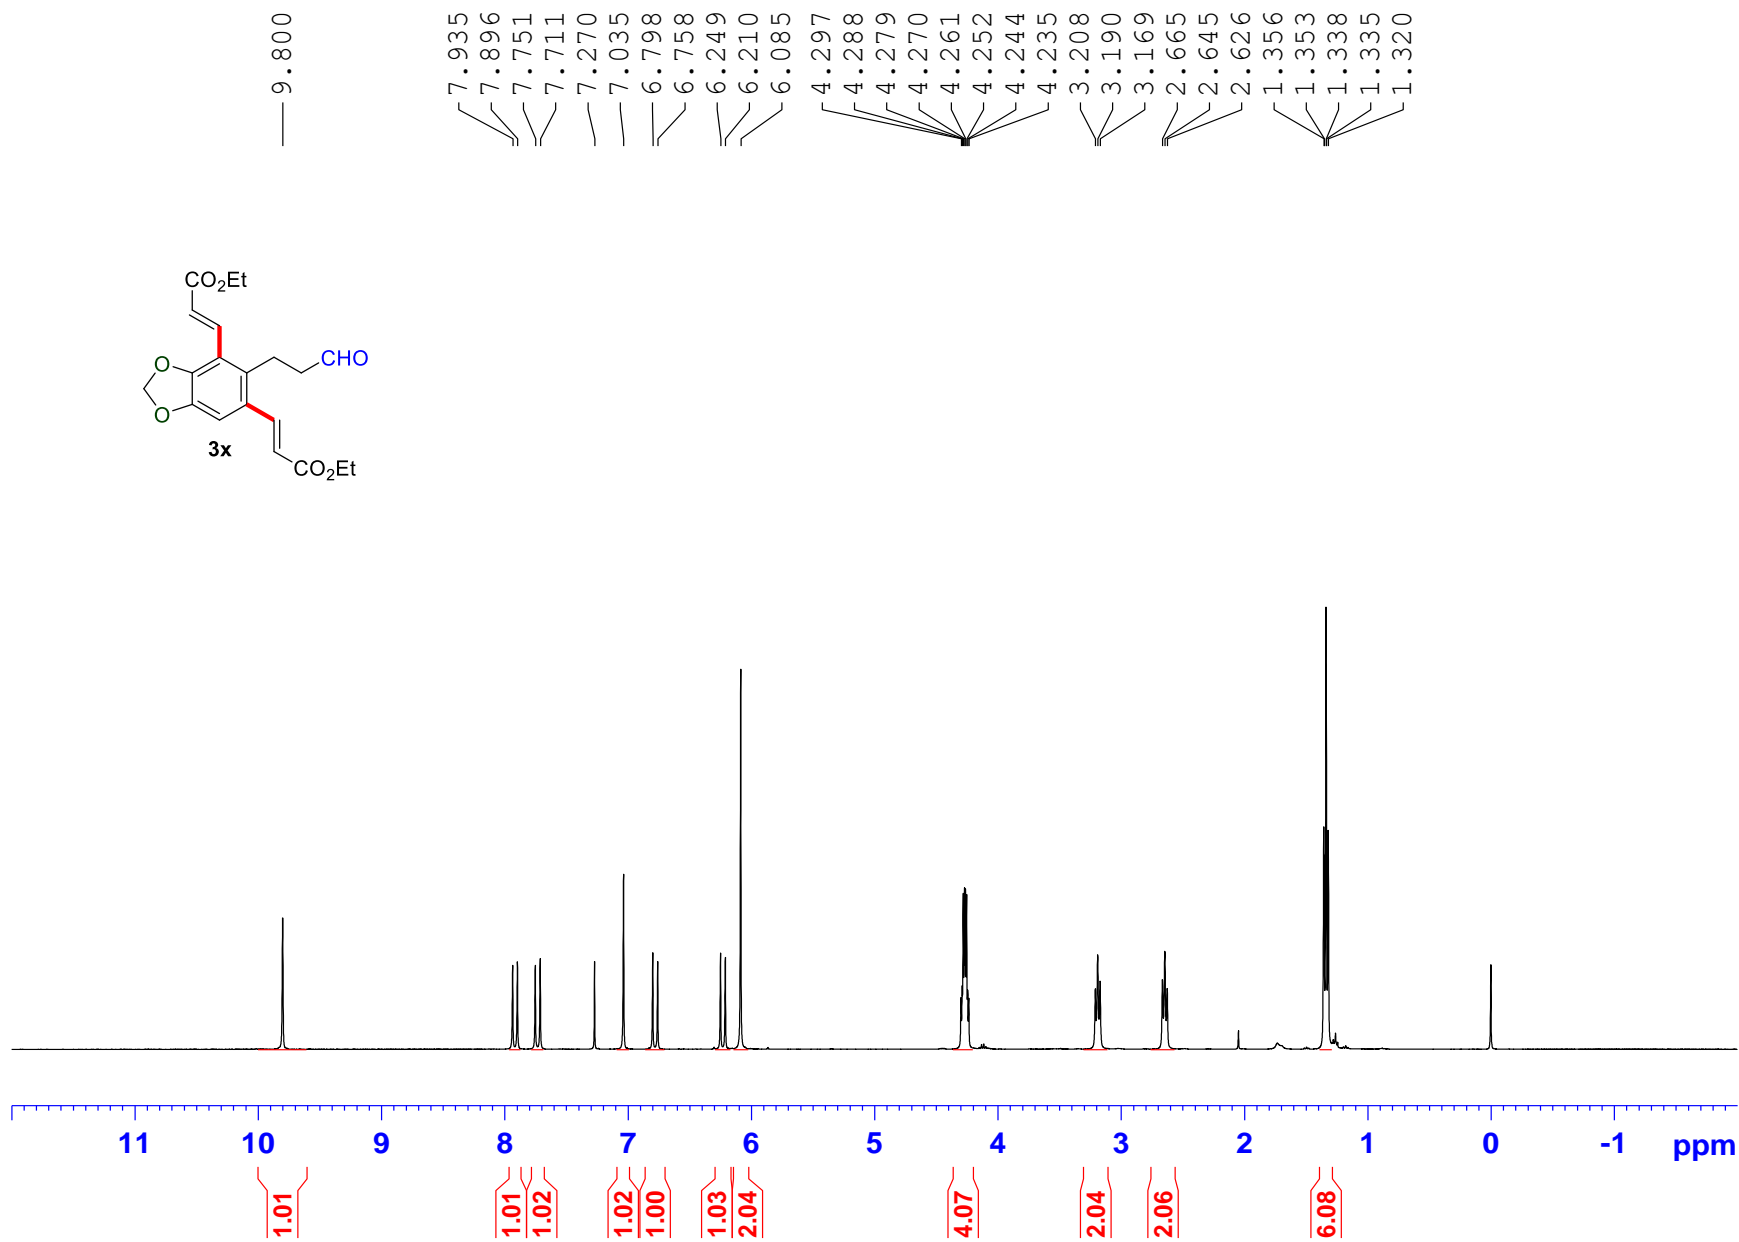

S301

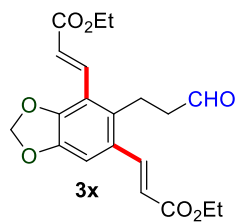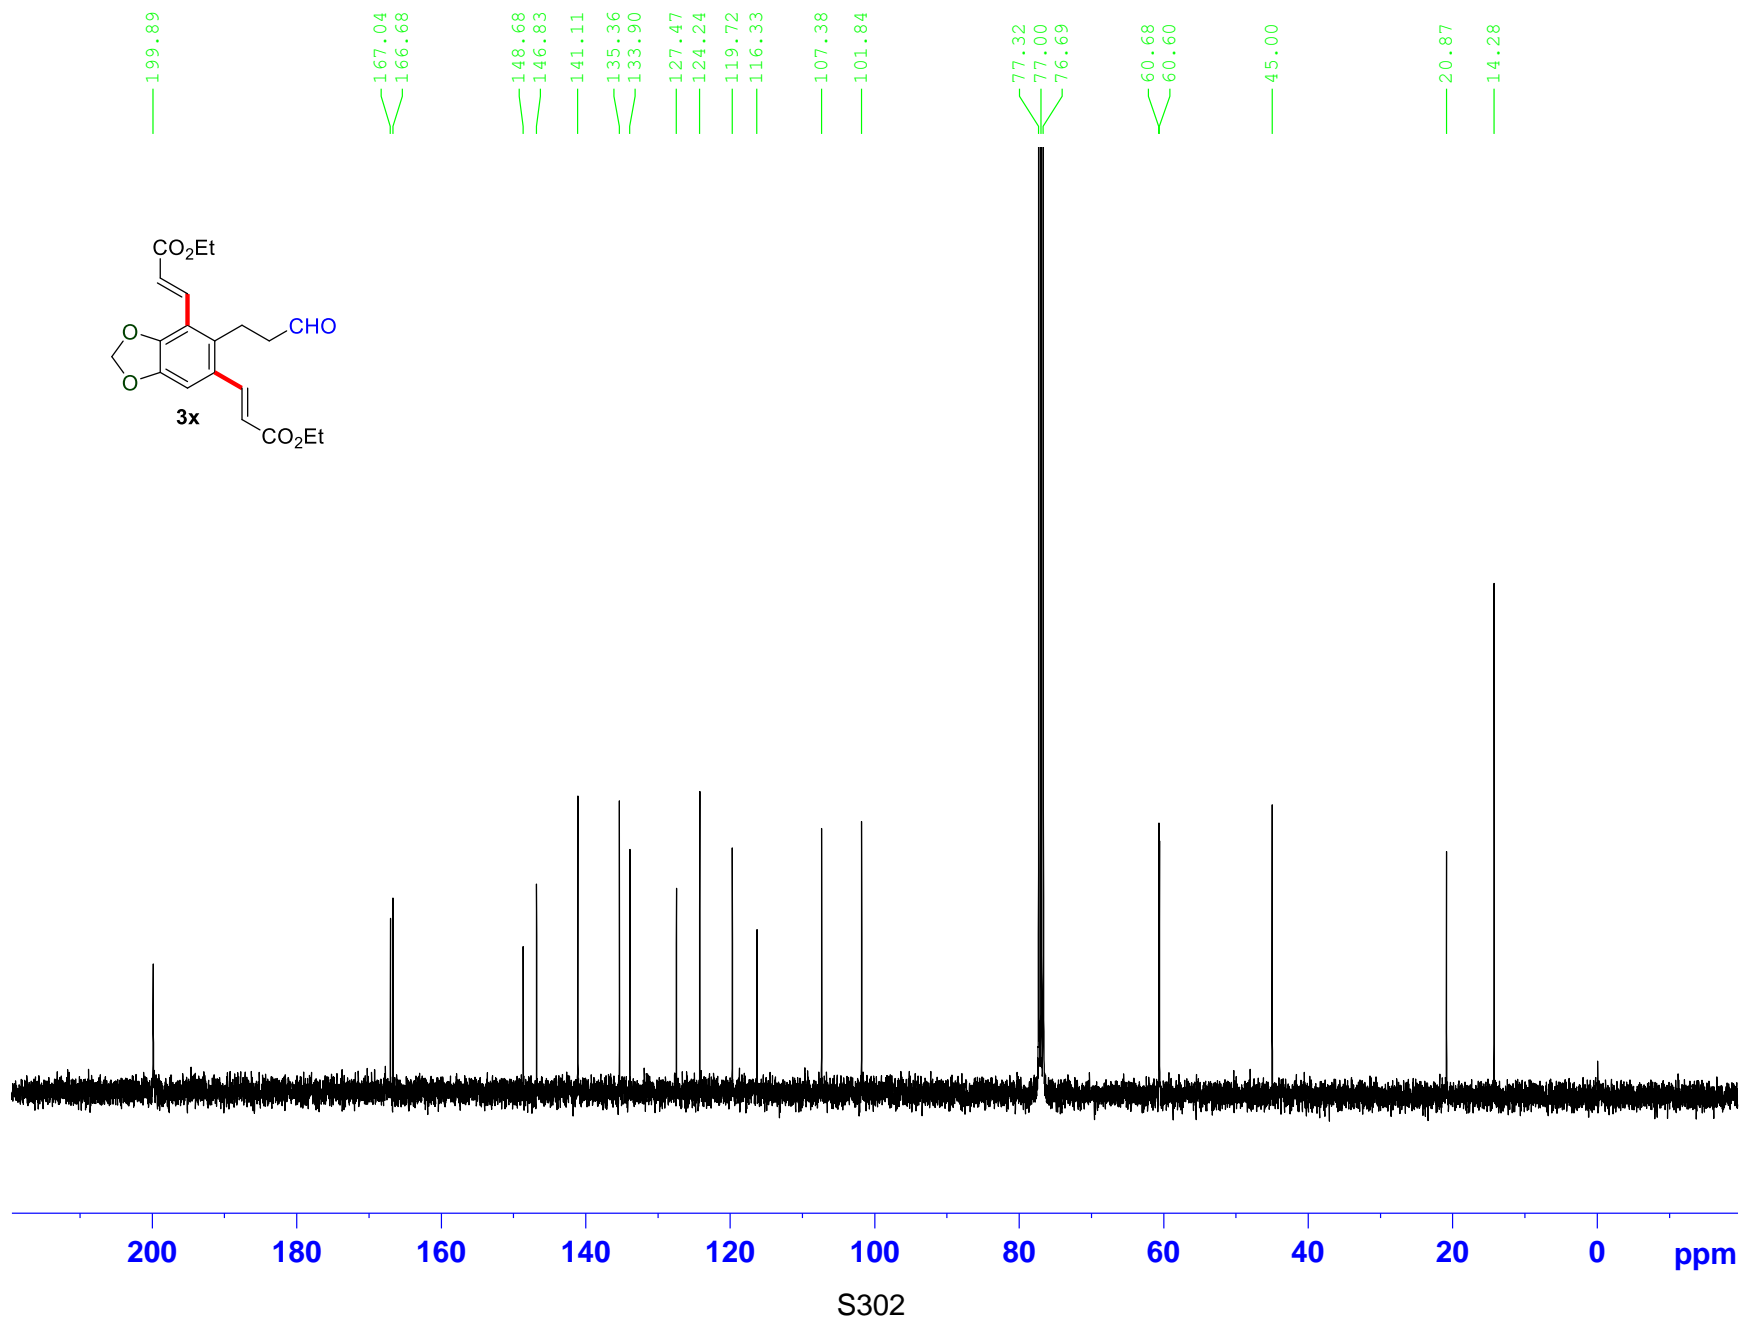

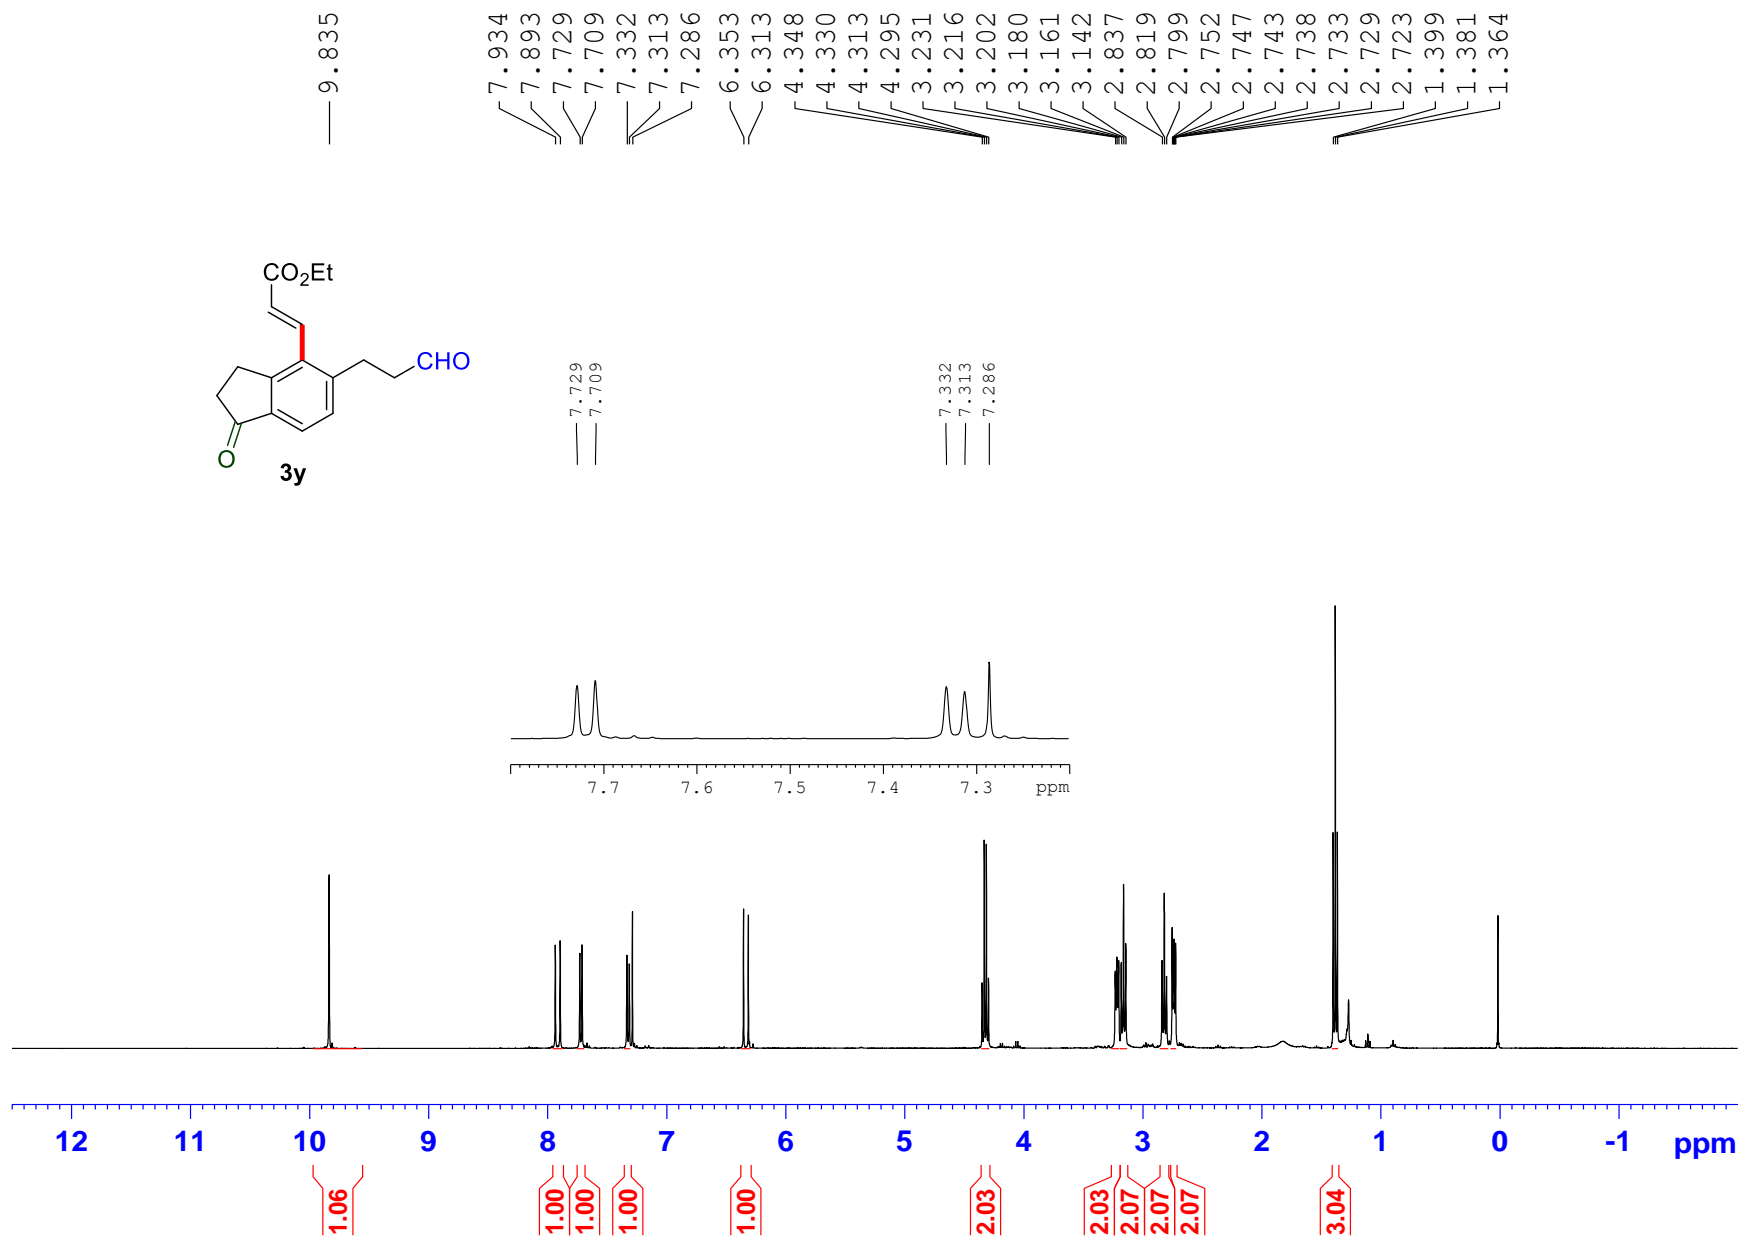

S303

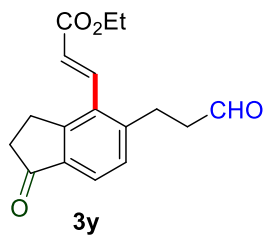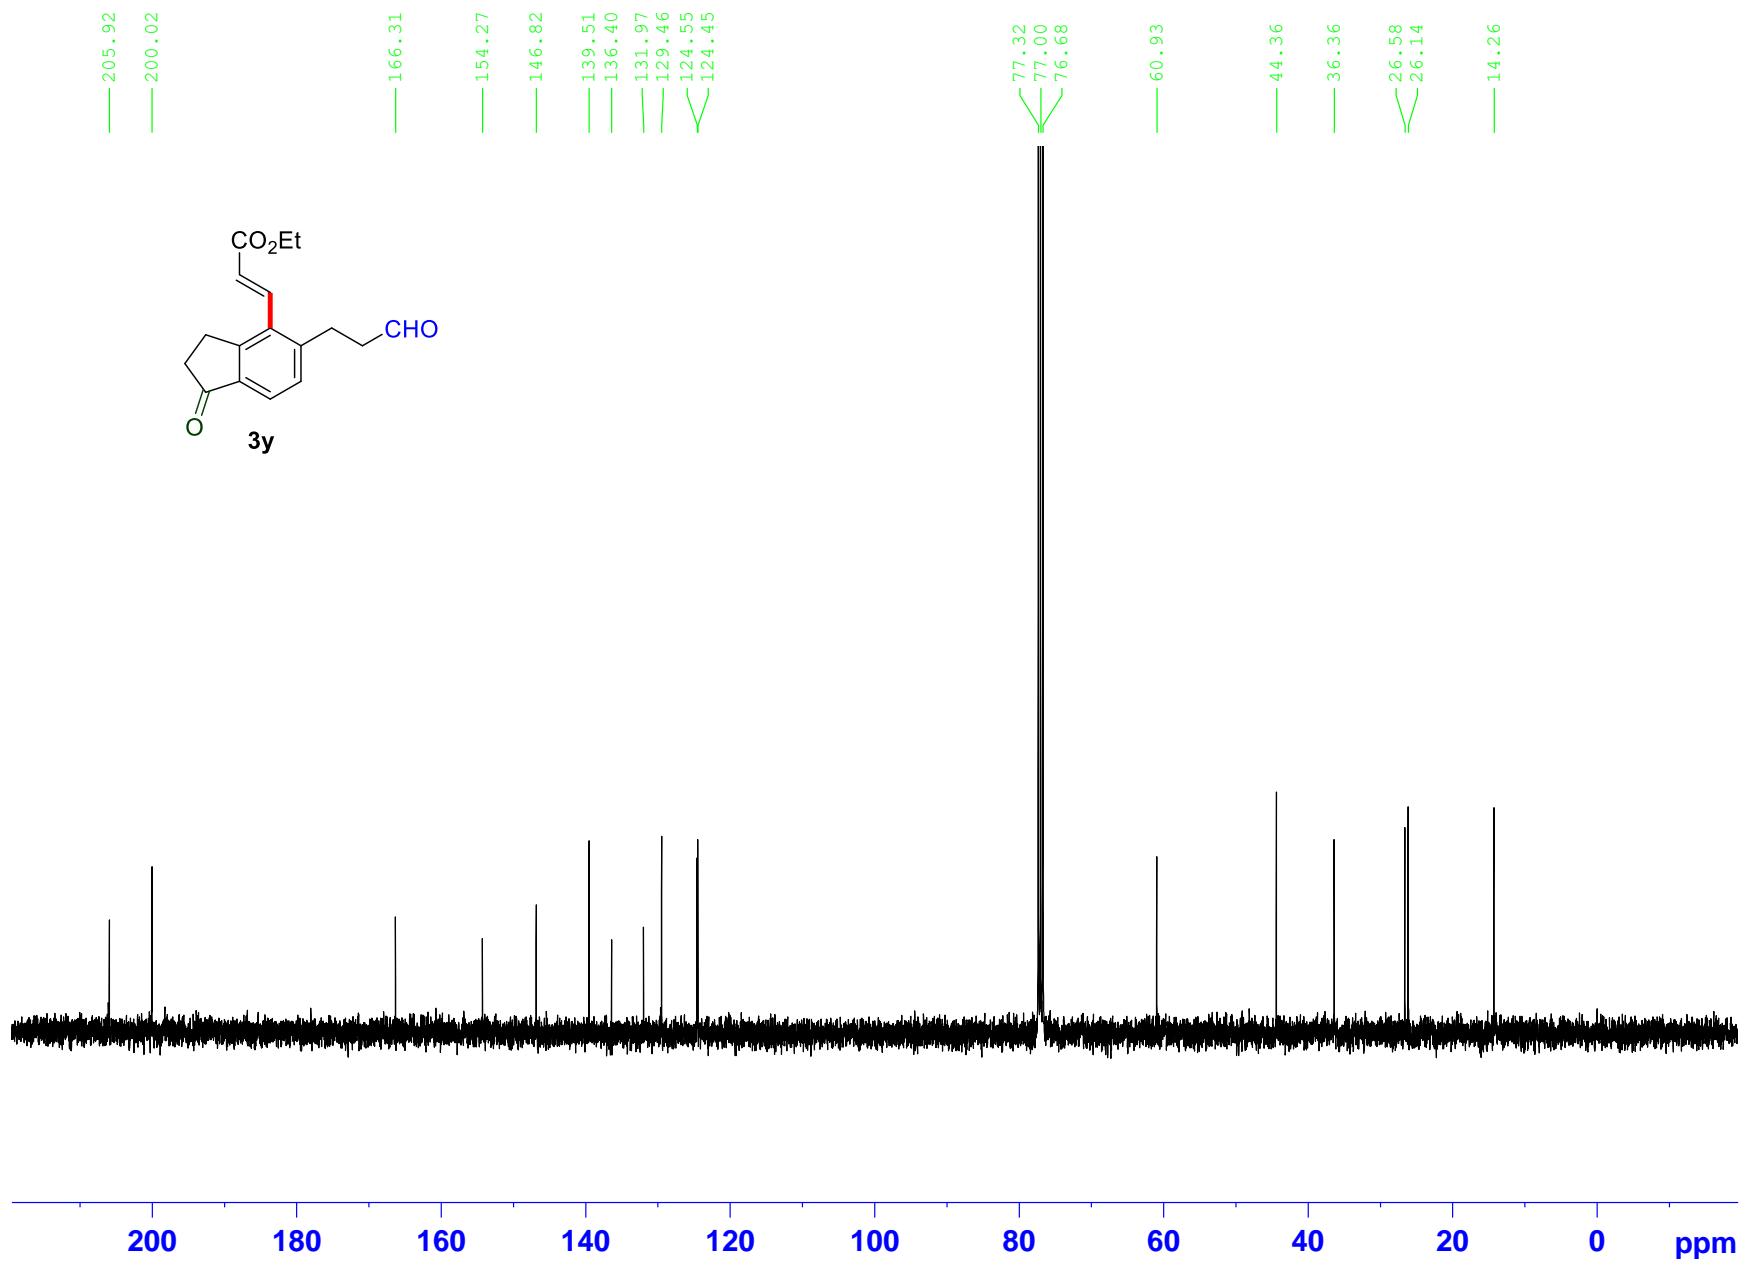

S304



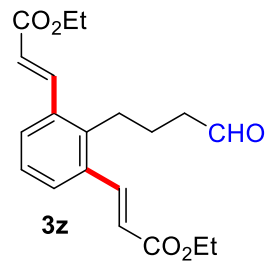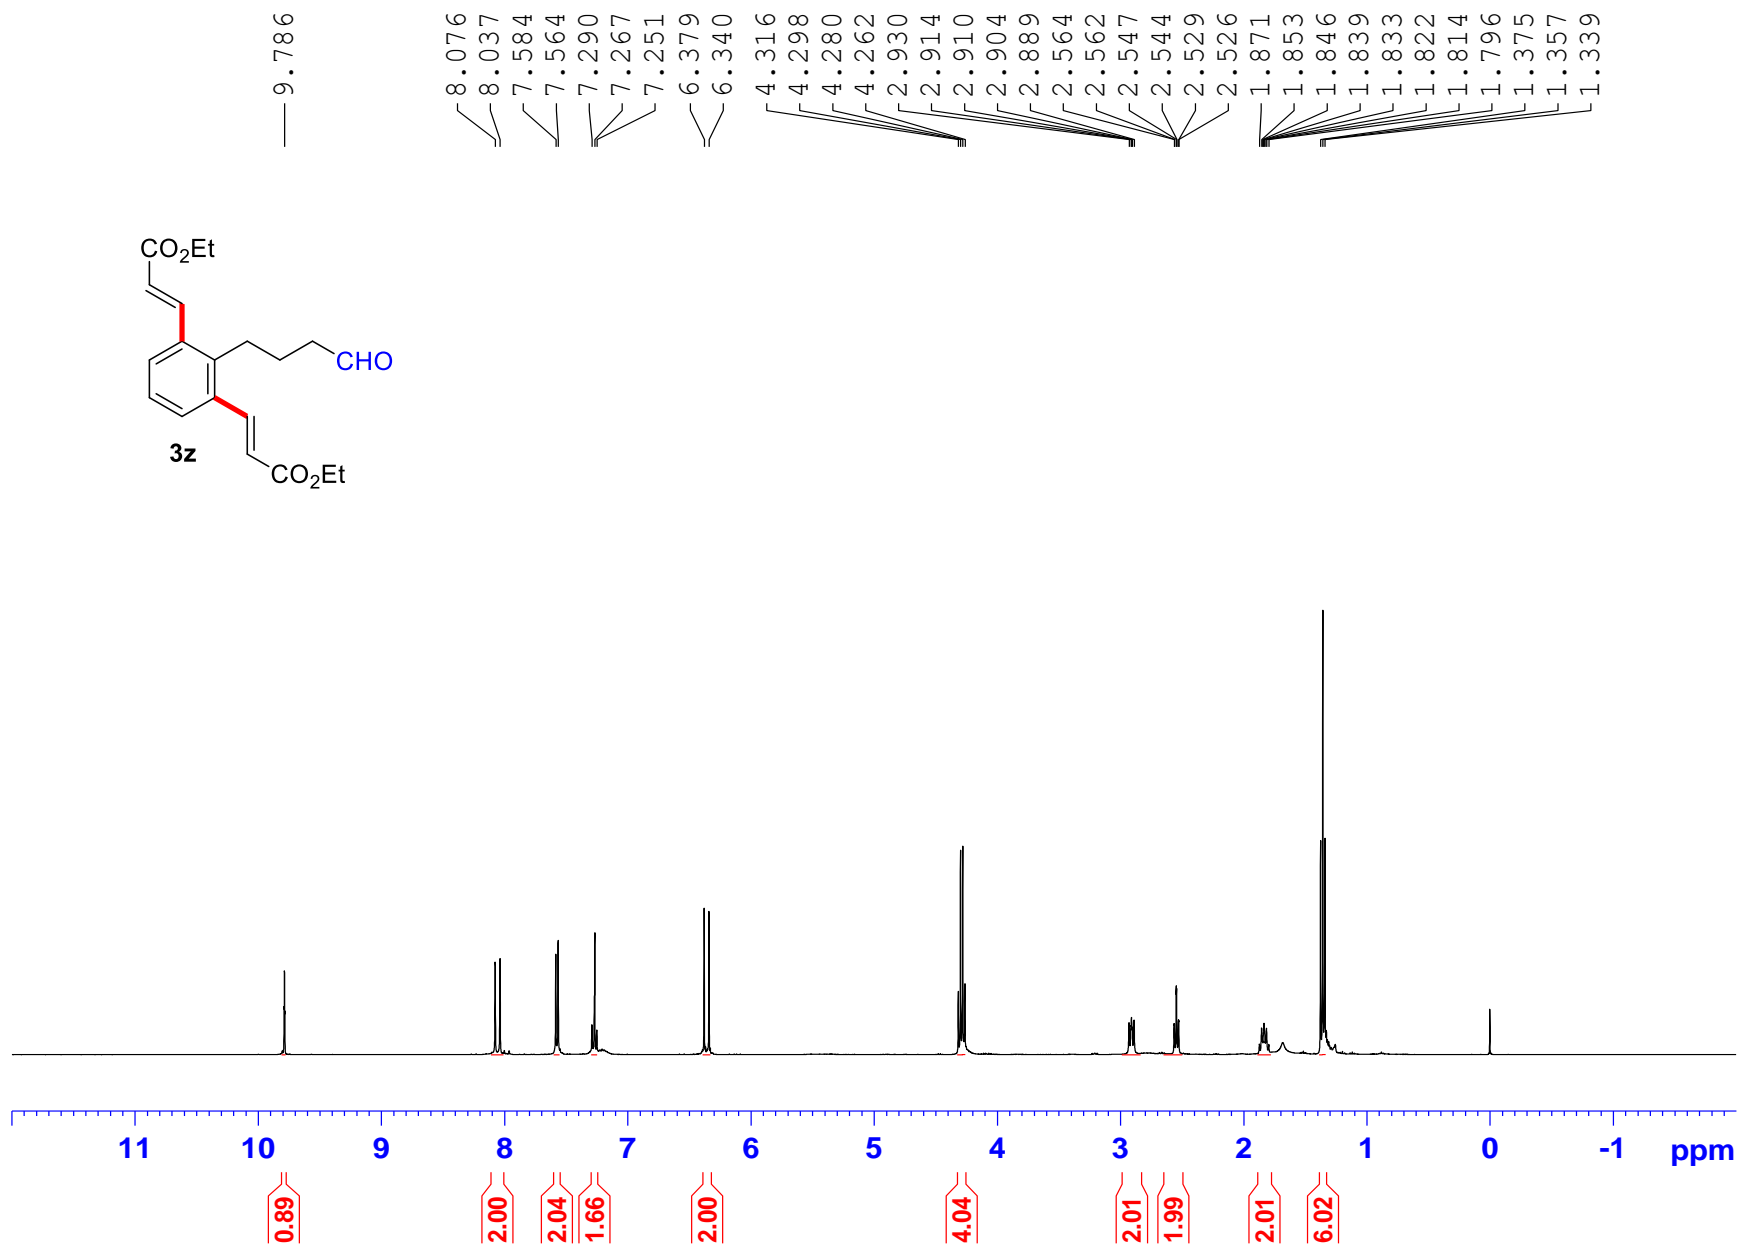

S305

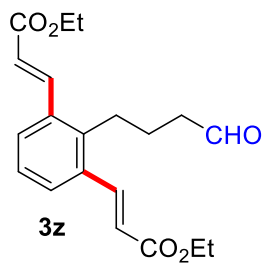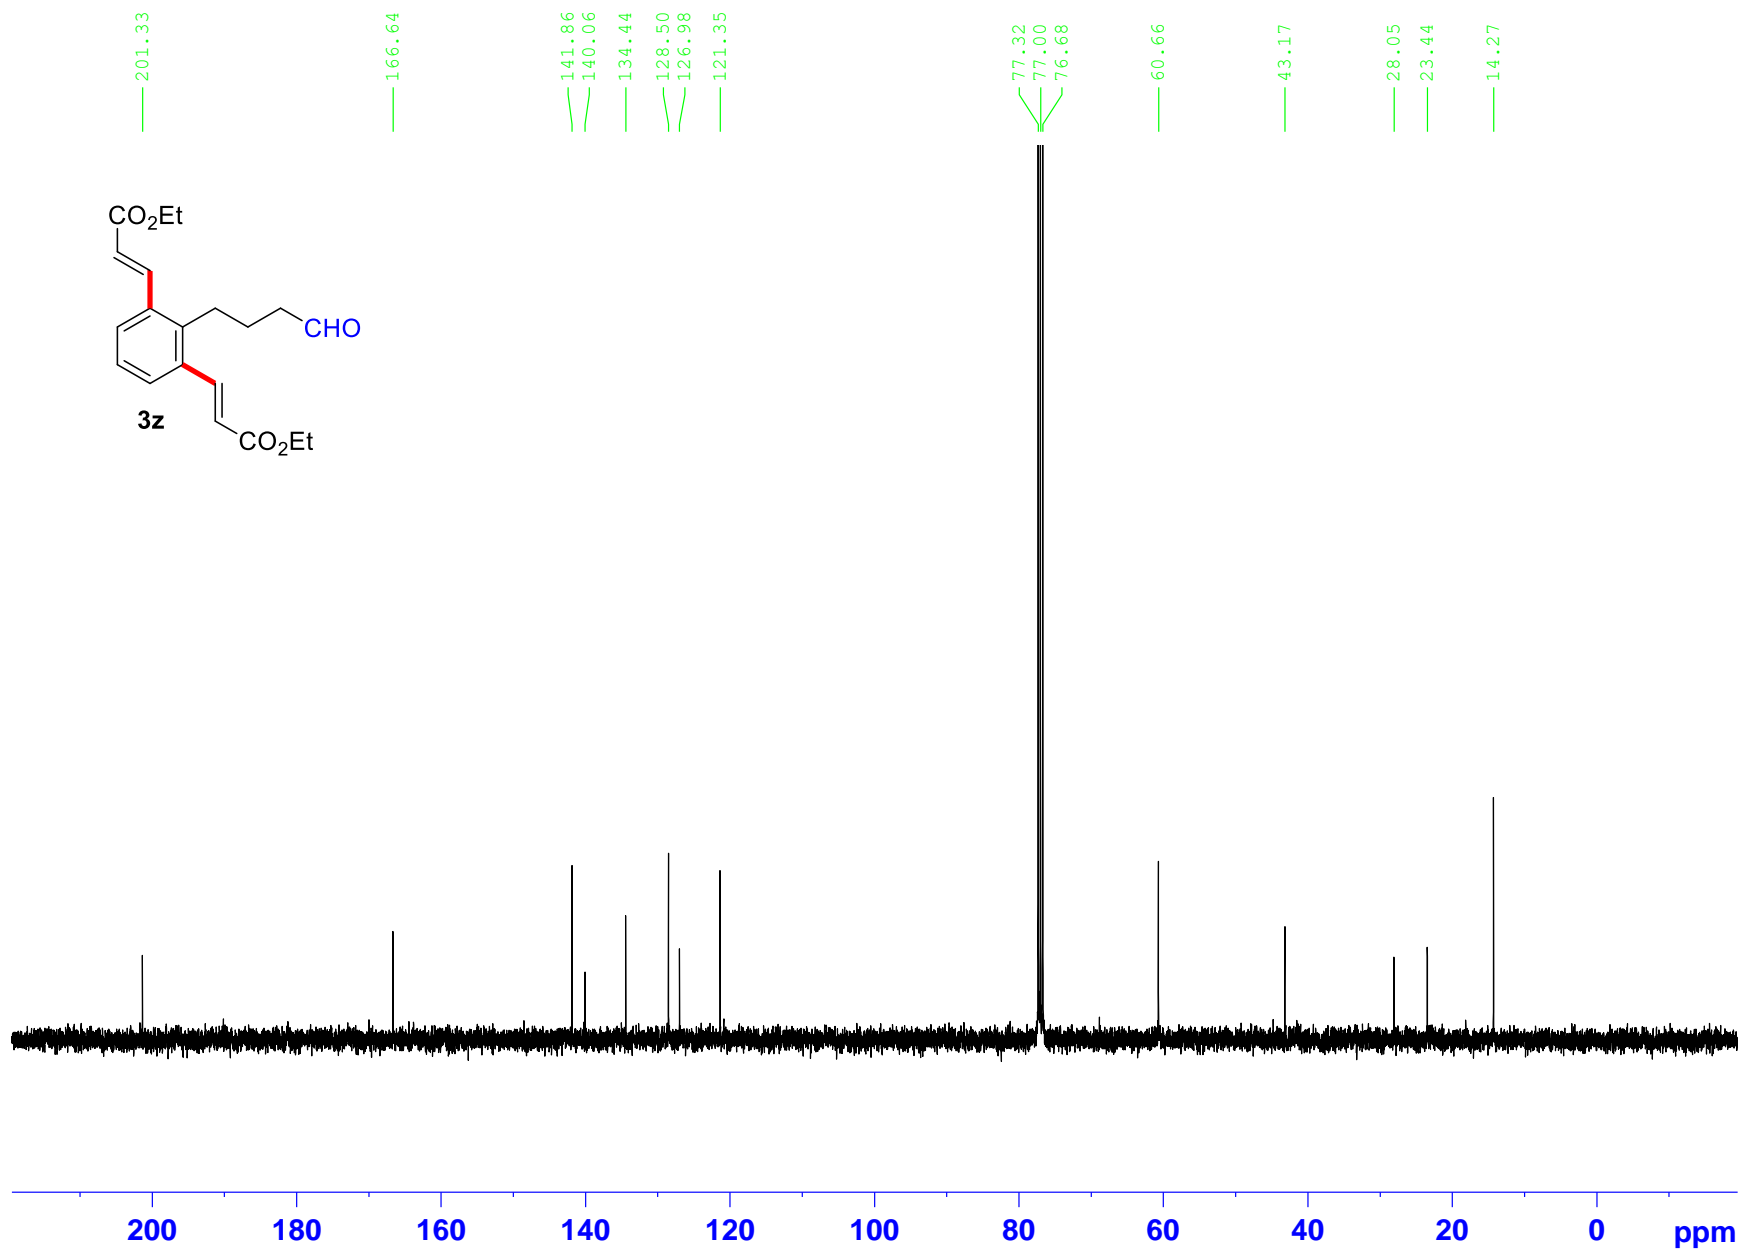

S306

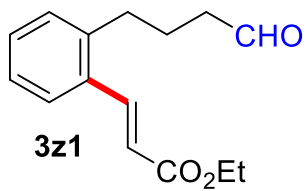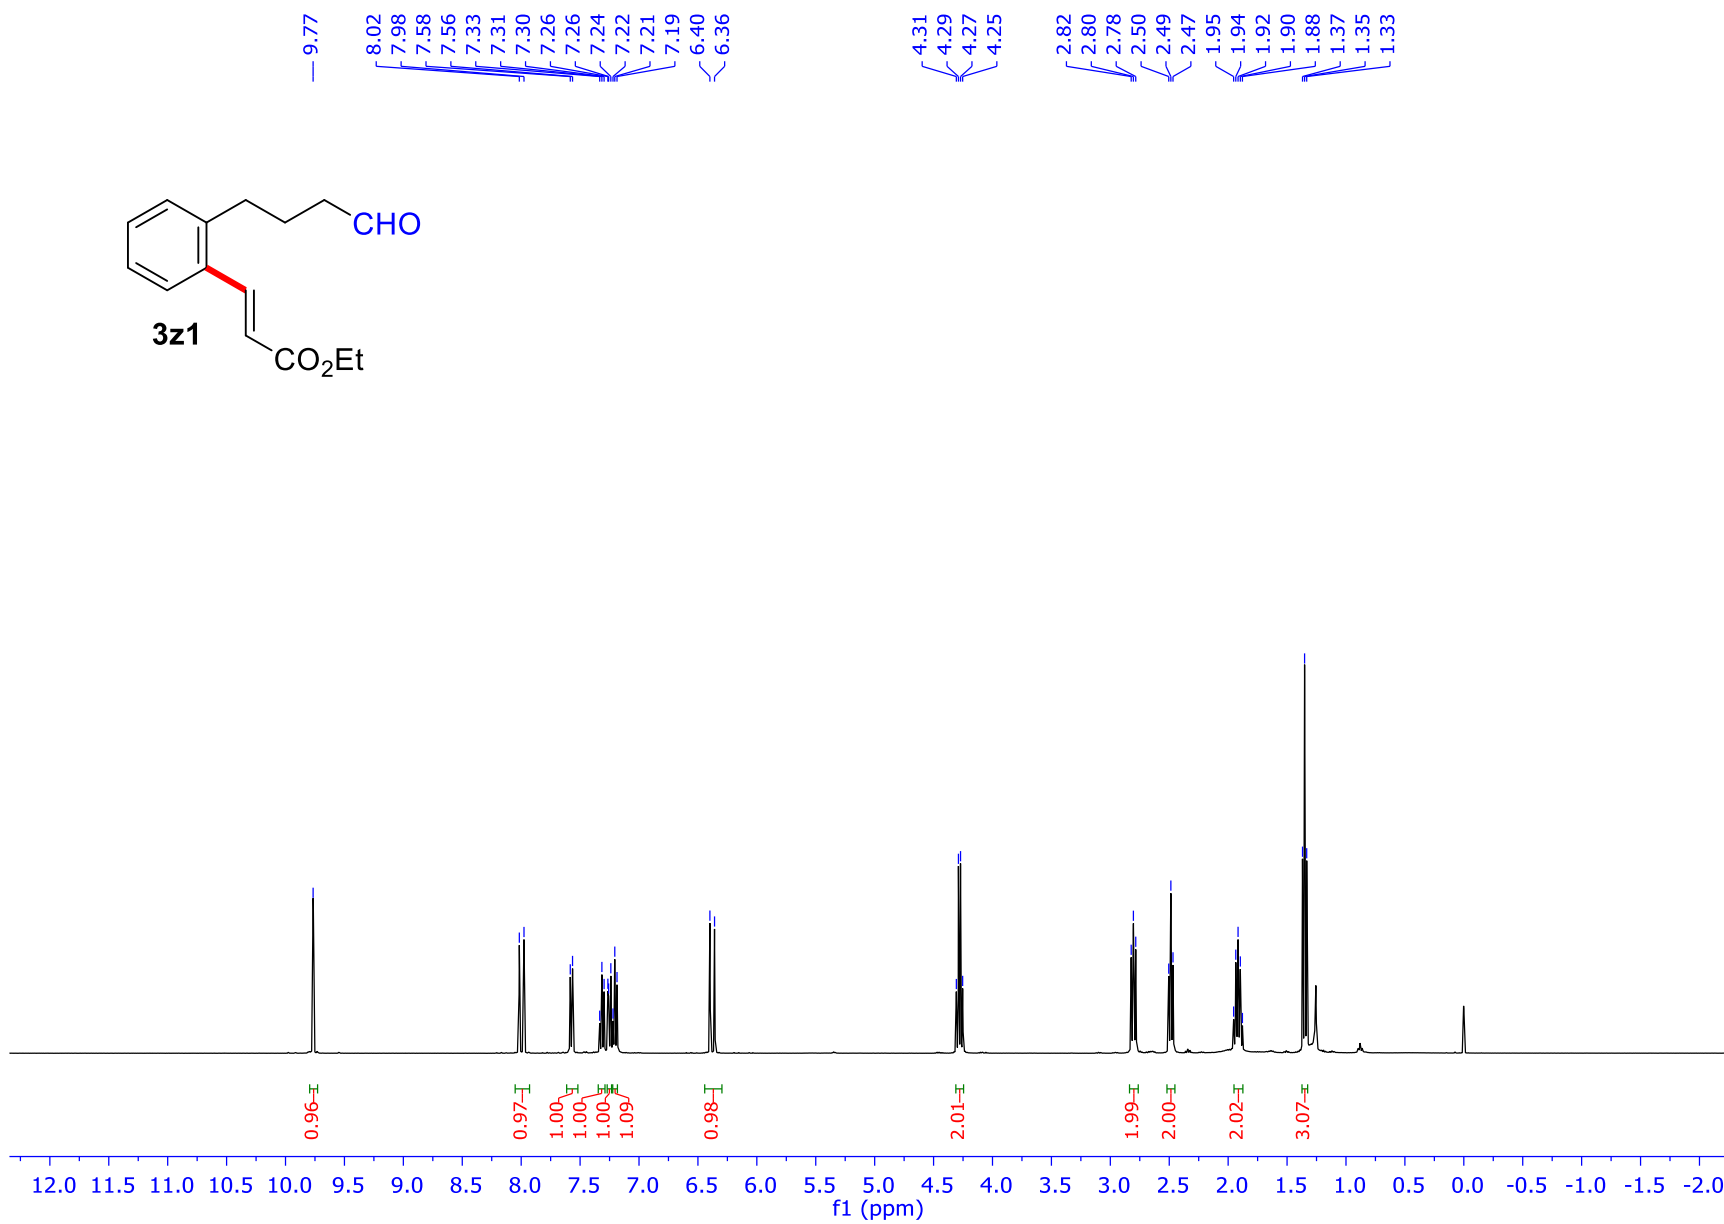

S307

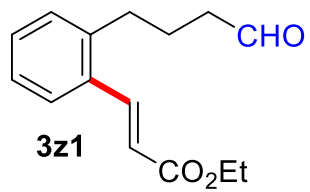

— 201.96

— 167.05

141.83

140.97

133.17

130.19

126.93

126.82

119.97

77.44

77.12

76.81

— 60.65

— 43.20

— 32.41

— 23.75

— 14.41

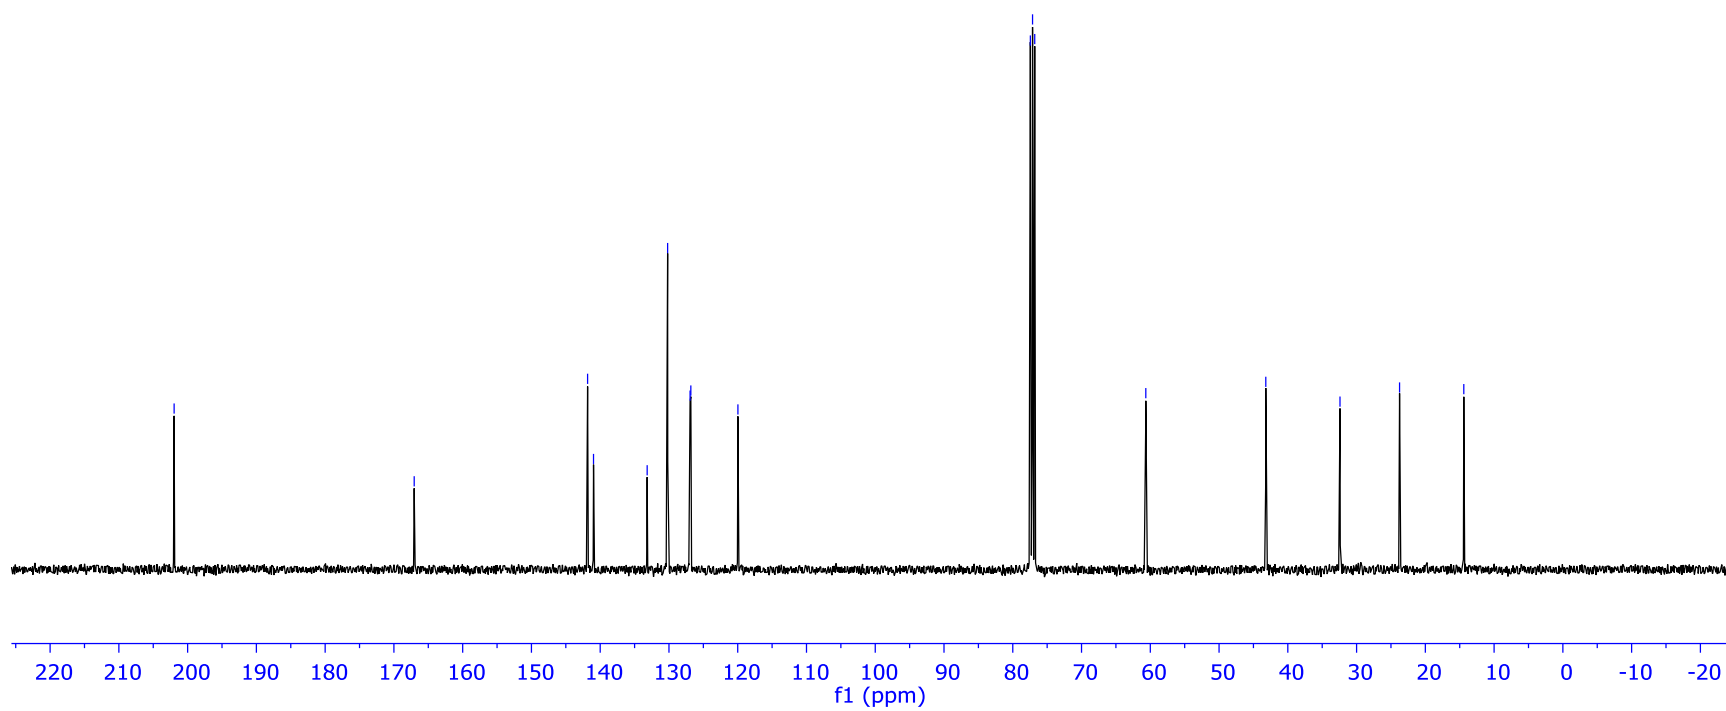

S308

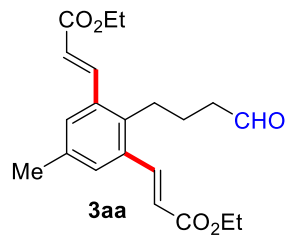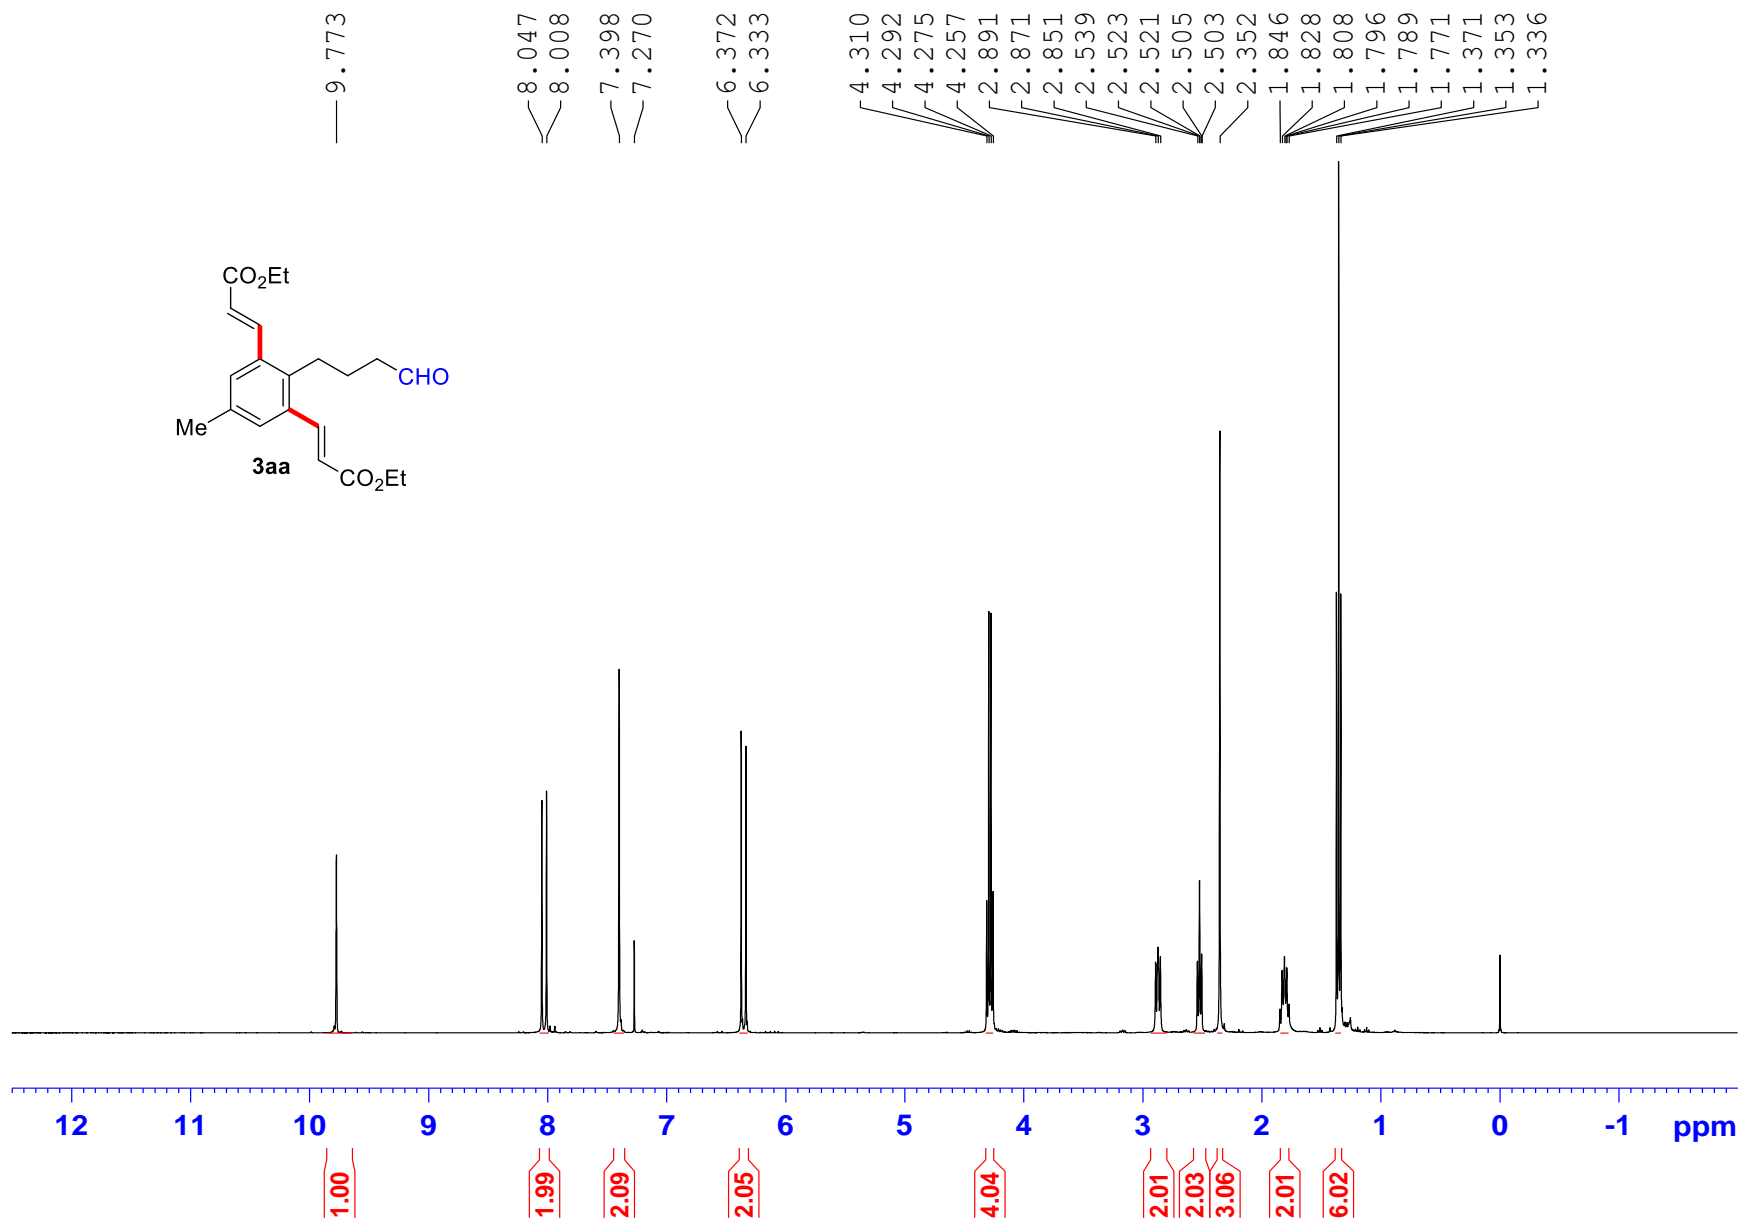

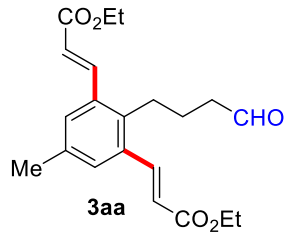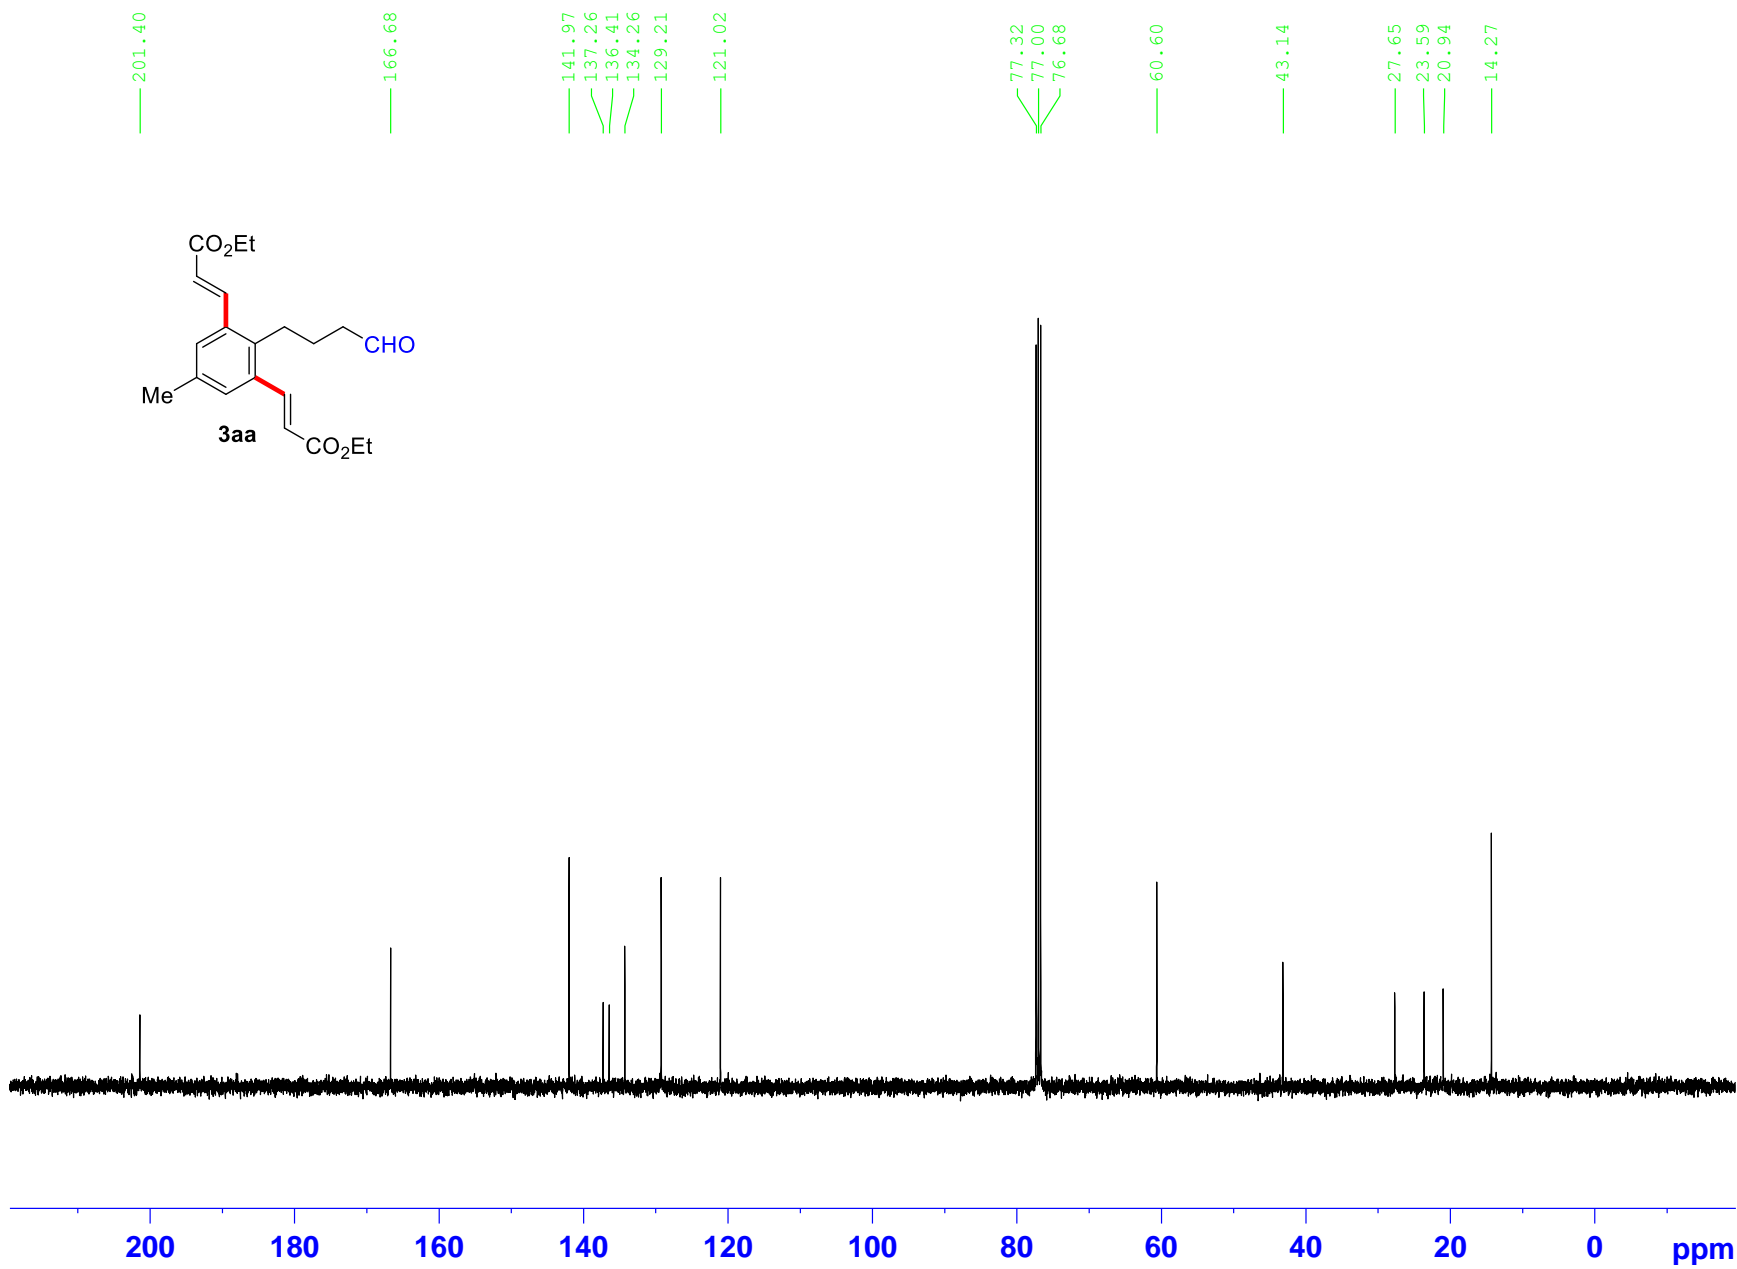

S310

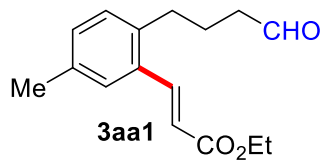

9.775

8.008  
7.969  
7.413  
7.286  
7.163  
7.143  
7.141  
7.113  
7.093  
6.413  
6.374

4.321  
4.303  
4.286  
4.268  
2.803  
2.784  
2.764  
2.511  
2.508  
2.493  
2.490  
2.475  
2.472  
2.355  
1.948  
1.930  
1.911  
1.892  
1.874  
1.386  
1.368  
1.350

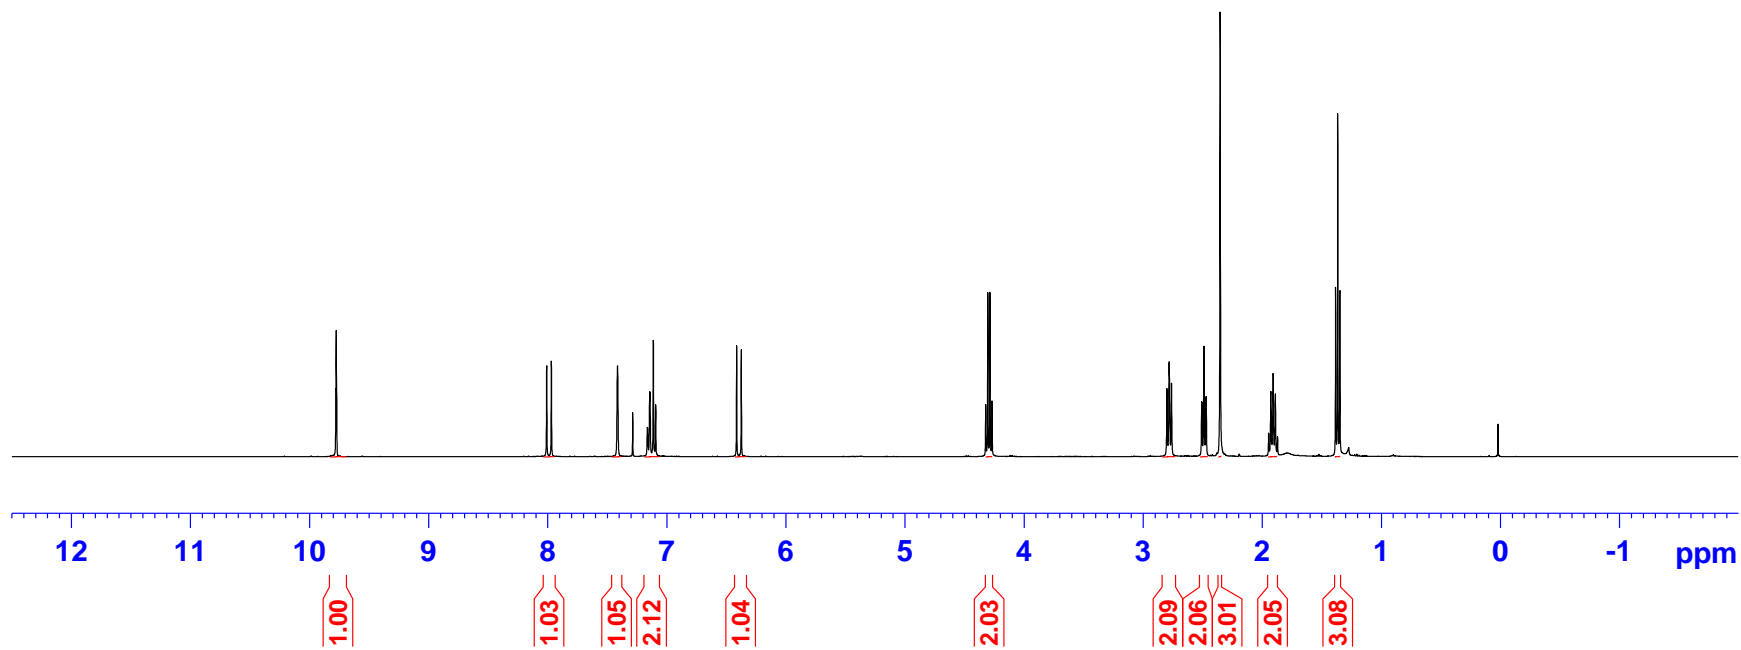

S311

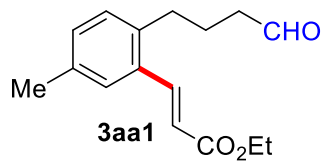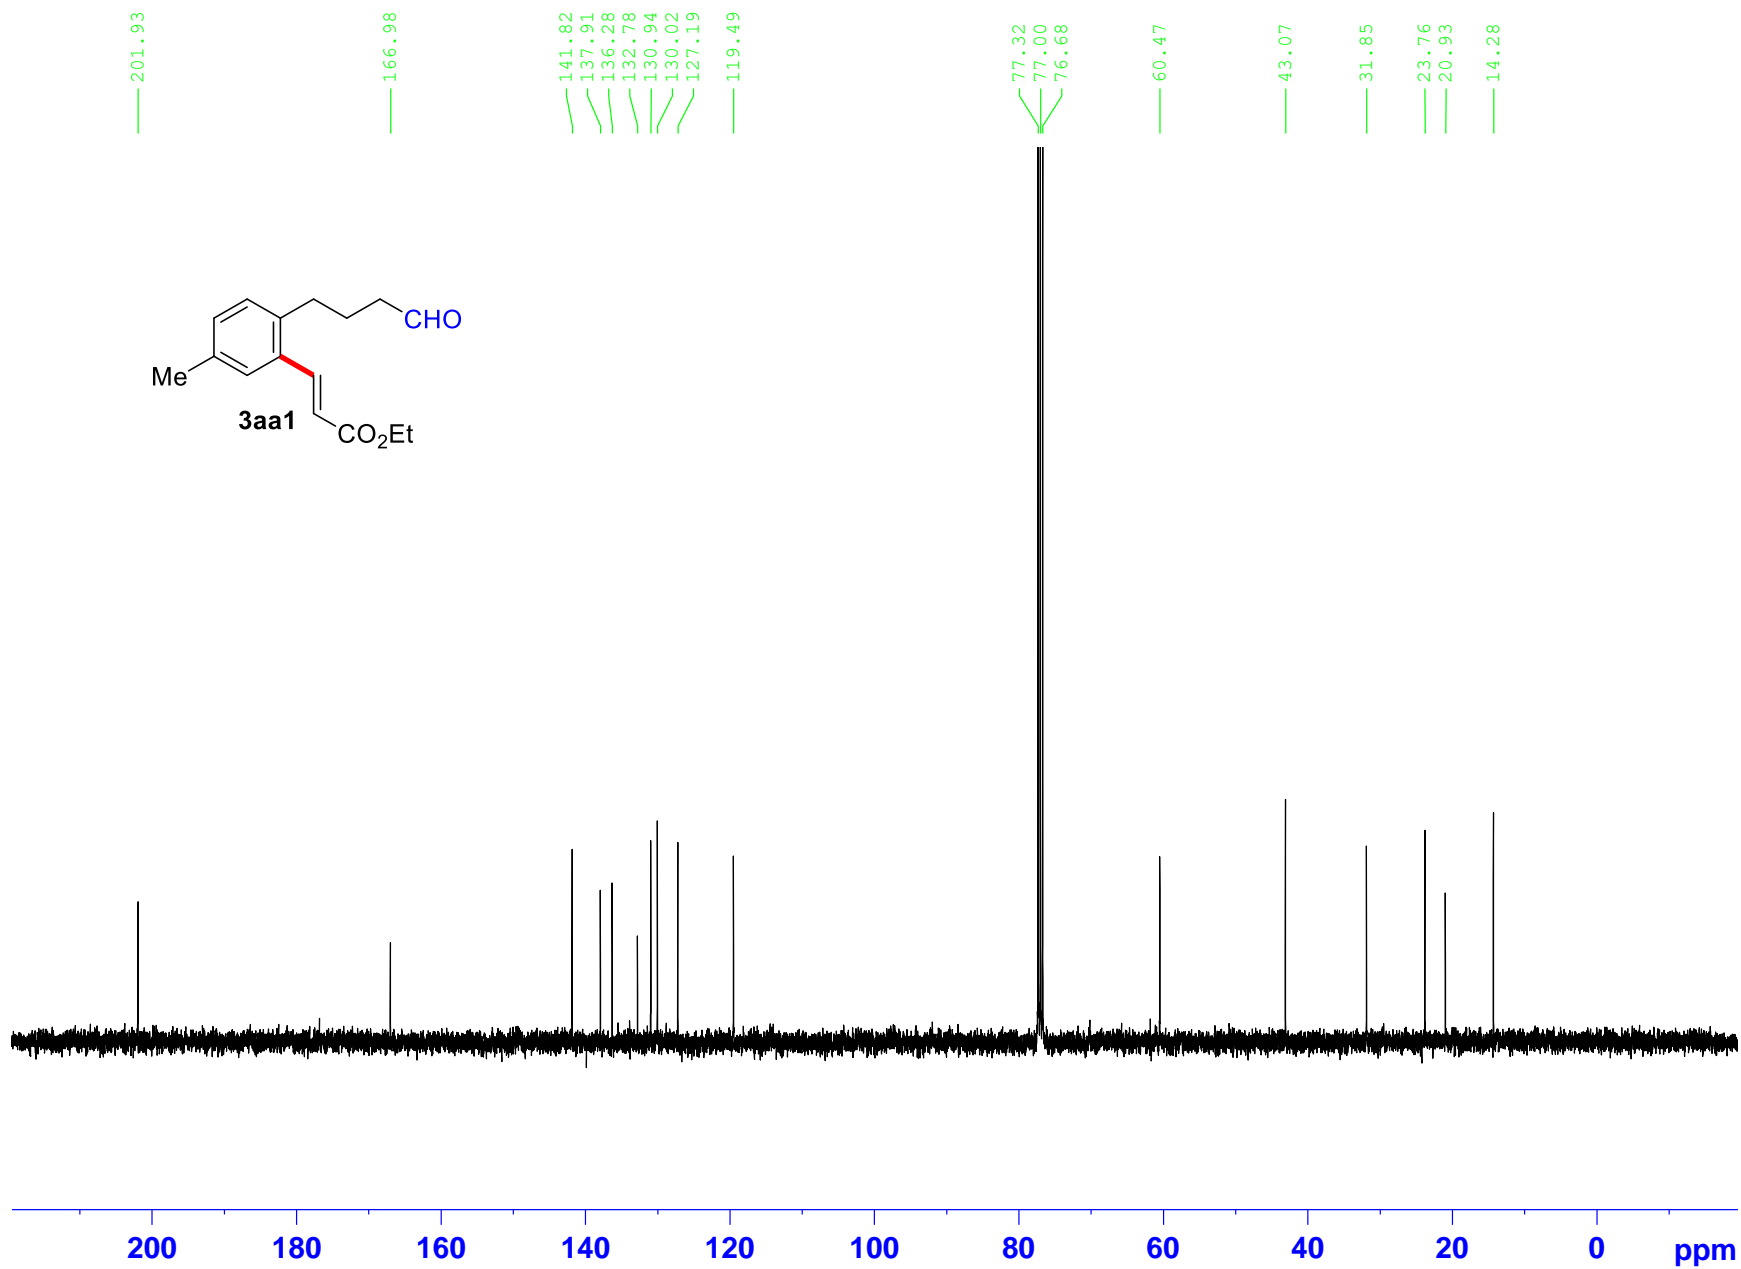

S312



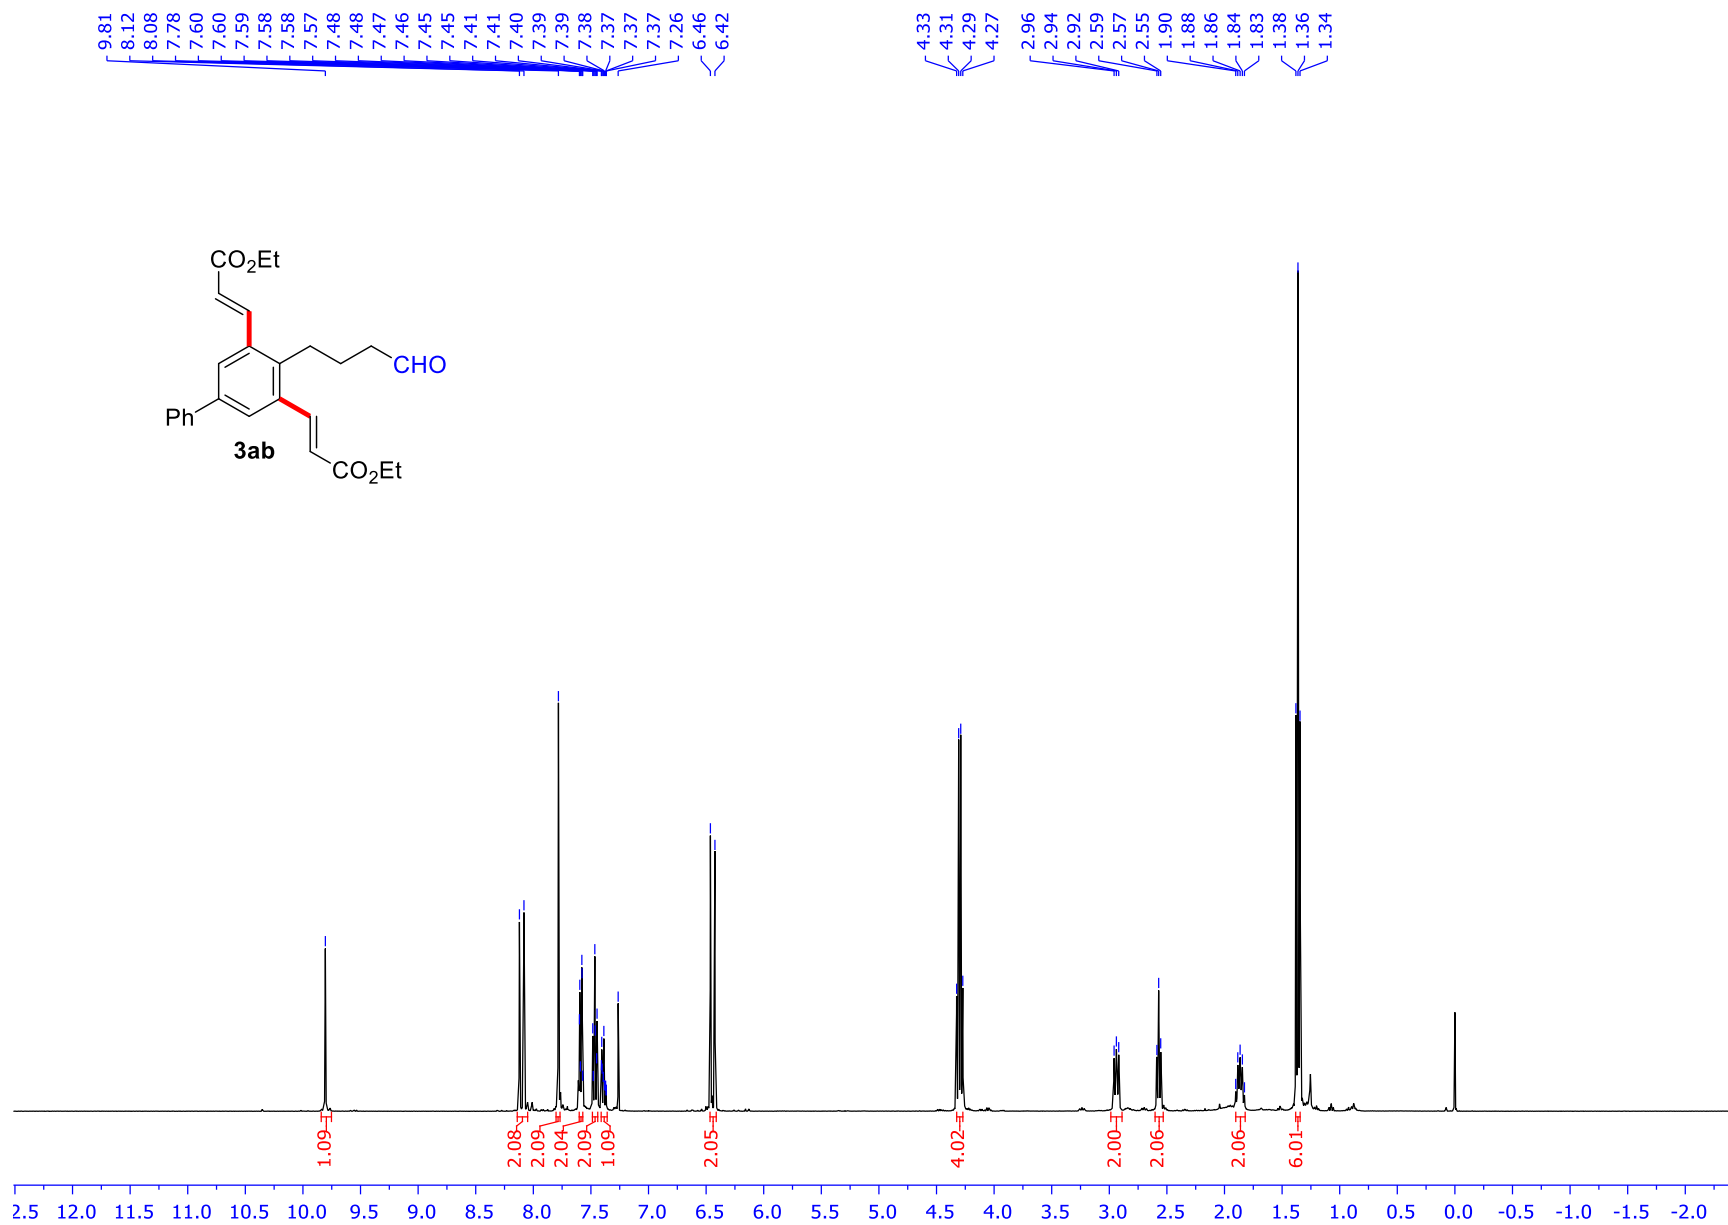

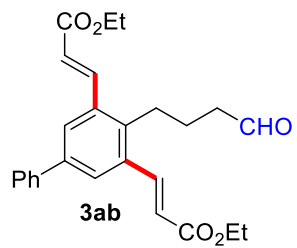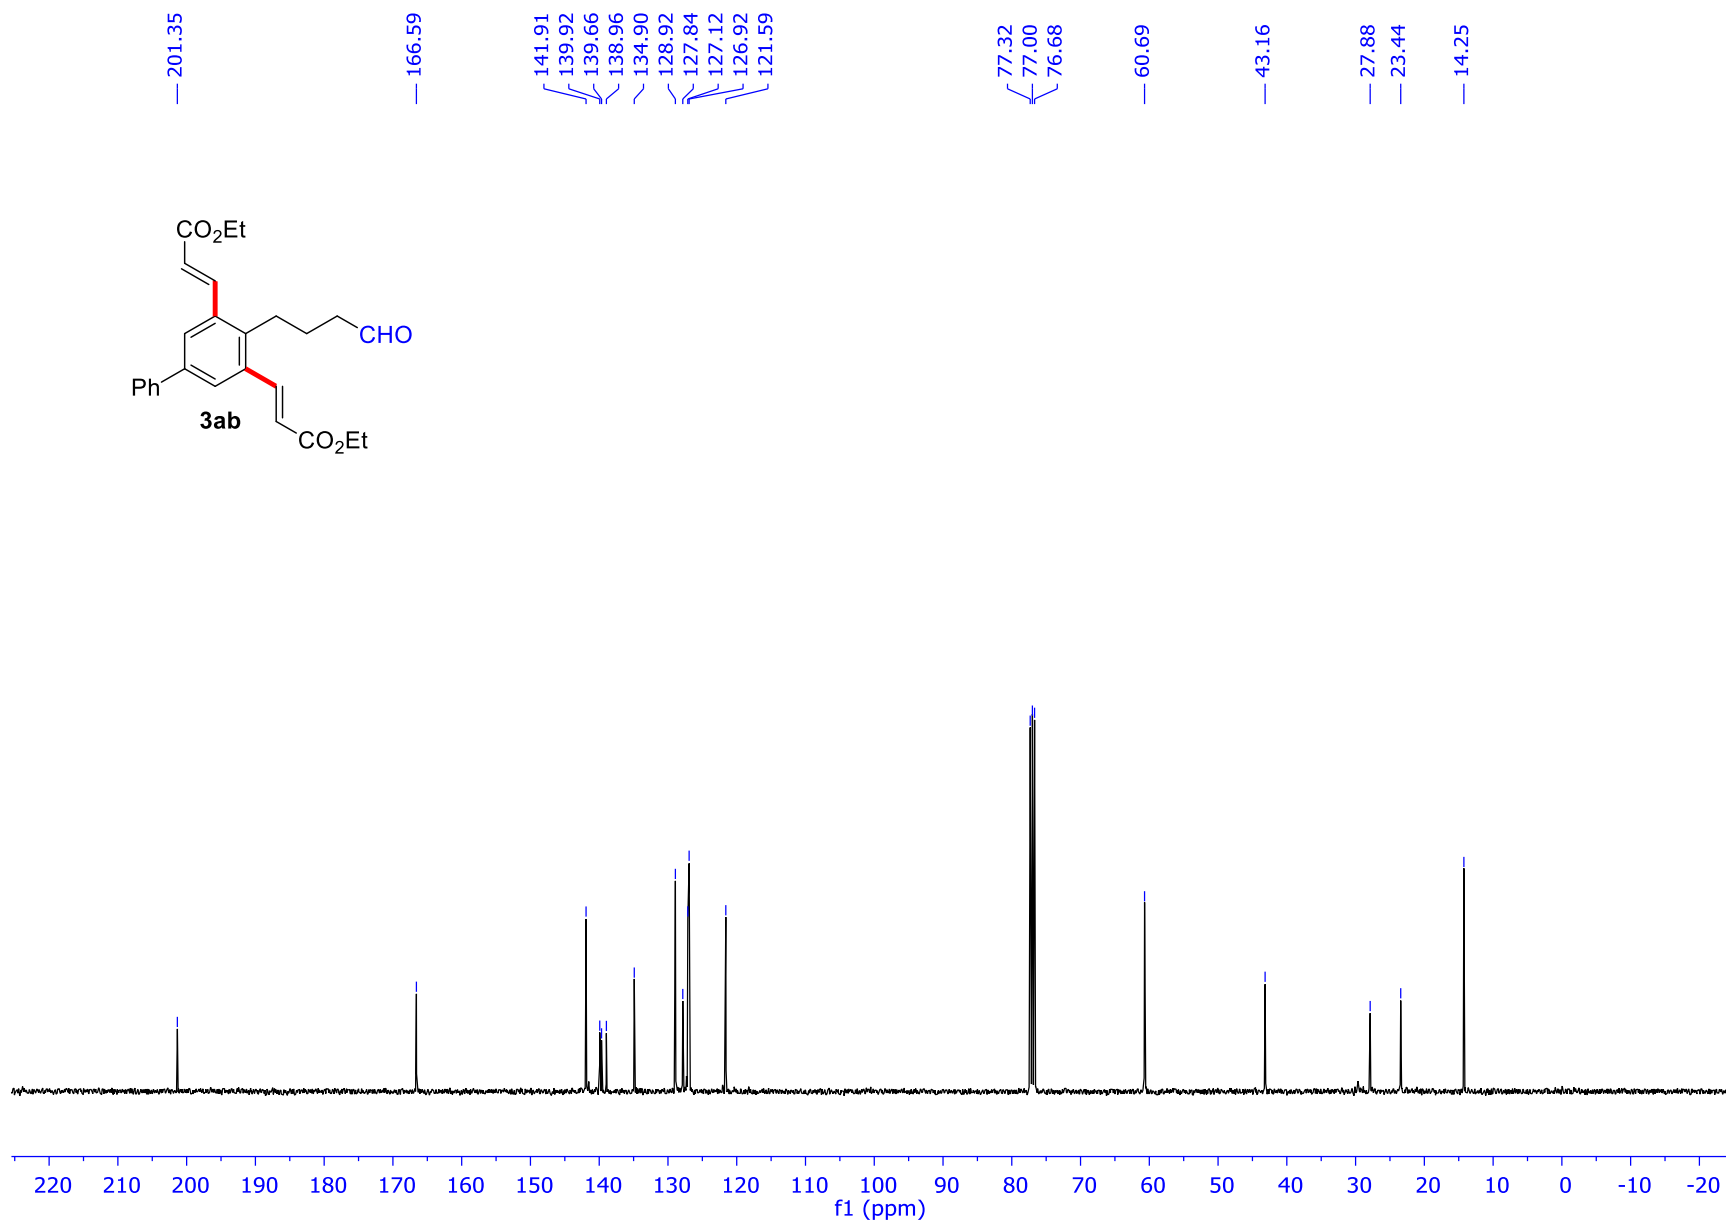

9.79  
8.06  
8.02  
7.79  
7.78  
7.59  
7.59  
7.58  
7.57  
7.57  
7.56  
7.55  
7.54  
7.53  
7.47  
7.47  
7.46  
7.45  
7.45  
7.44  
7.43  
7.43  
7.42  
7.38  
7.38  
7.37  
7.36  
7.36  
7.35  
7.34  
7.34  
7.34  
7.28  
7.26  
7.26  
7.26  
6.48  
6.44  
4.32  
4.30  
4.28  
4.26  
2.86  
2.84  
2.84  
2.83  
2.82  
2.54  
2.54  
2.52  
2.52  
2.50  
2.50  
1.99  
1.97  
1.97  
1.96  
1.95  
1.95  
1.95  
1.94  
1.93  
1.93  
1.93  
1.91  
1.37  
1.36  
1.34

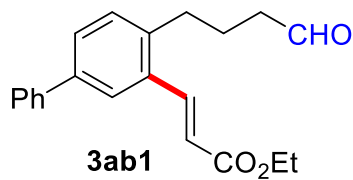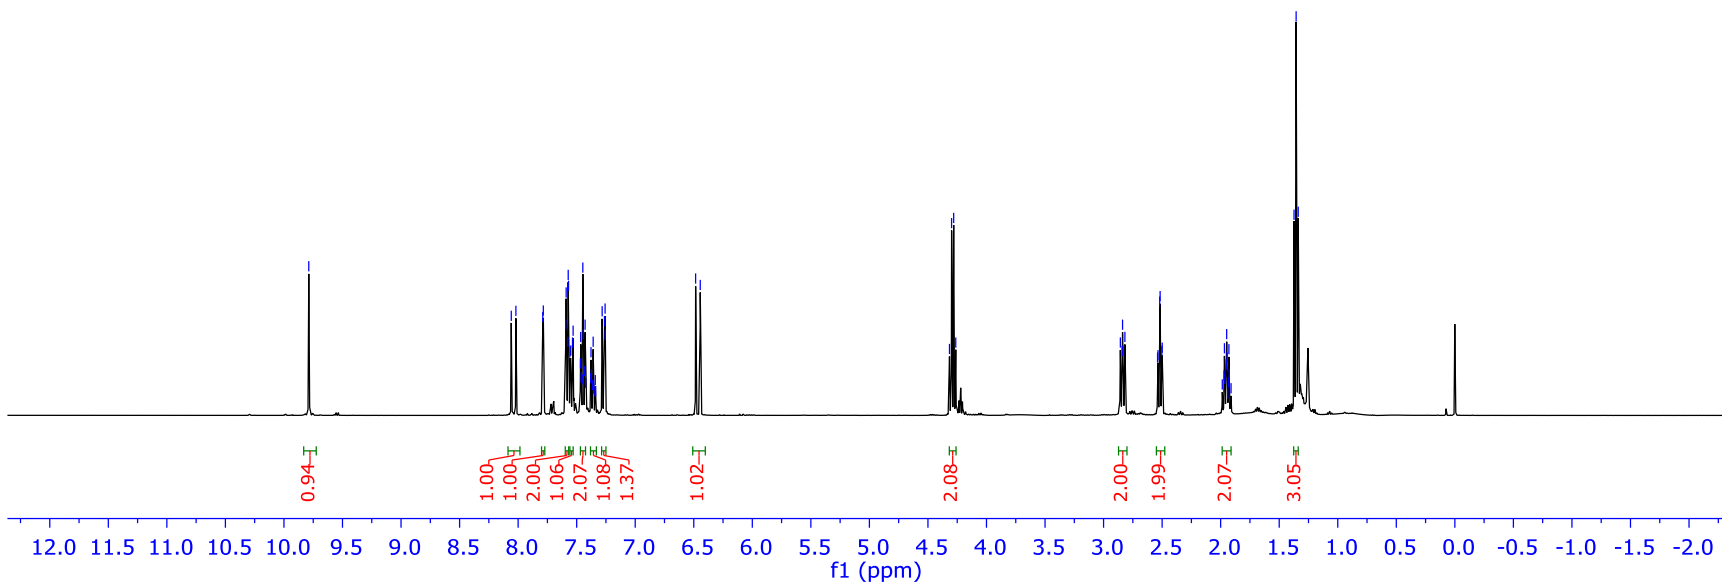

S315

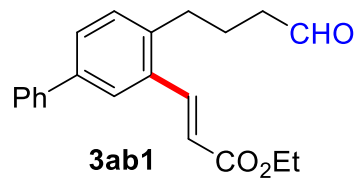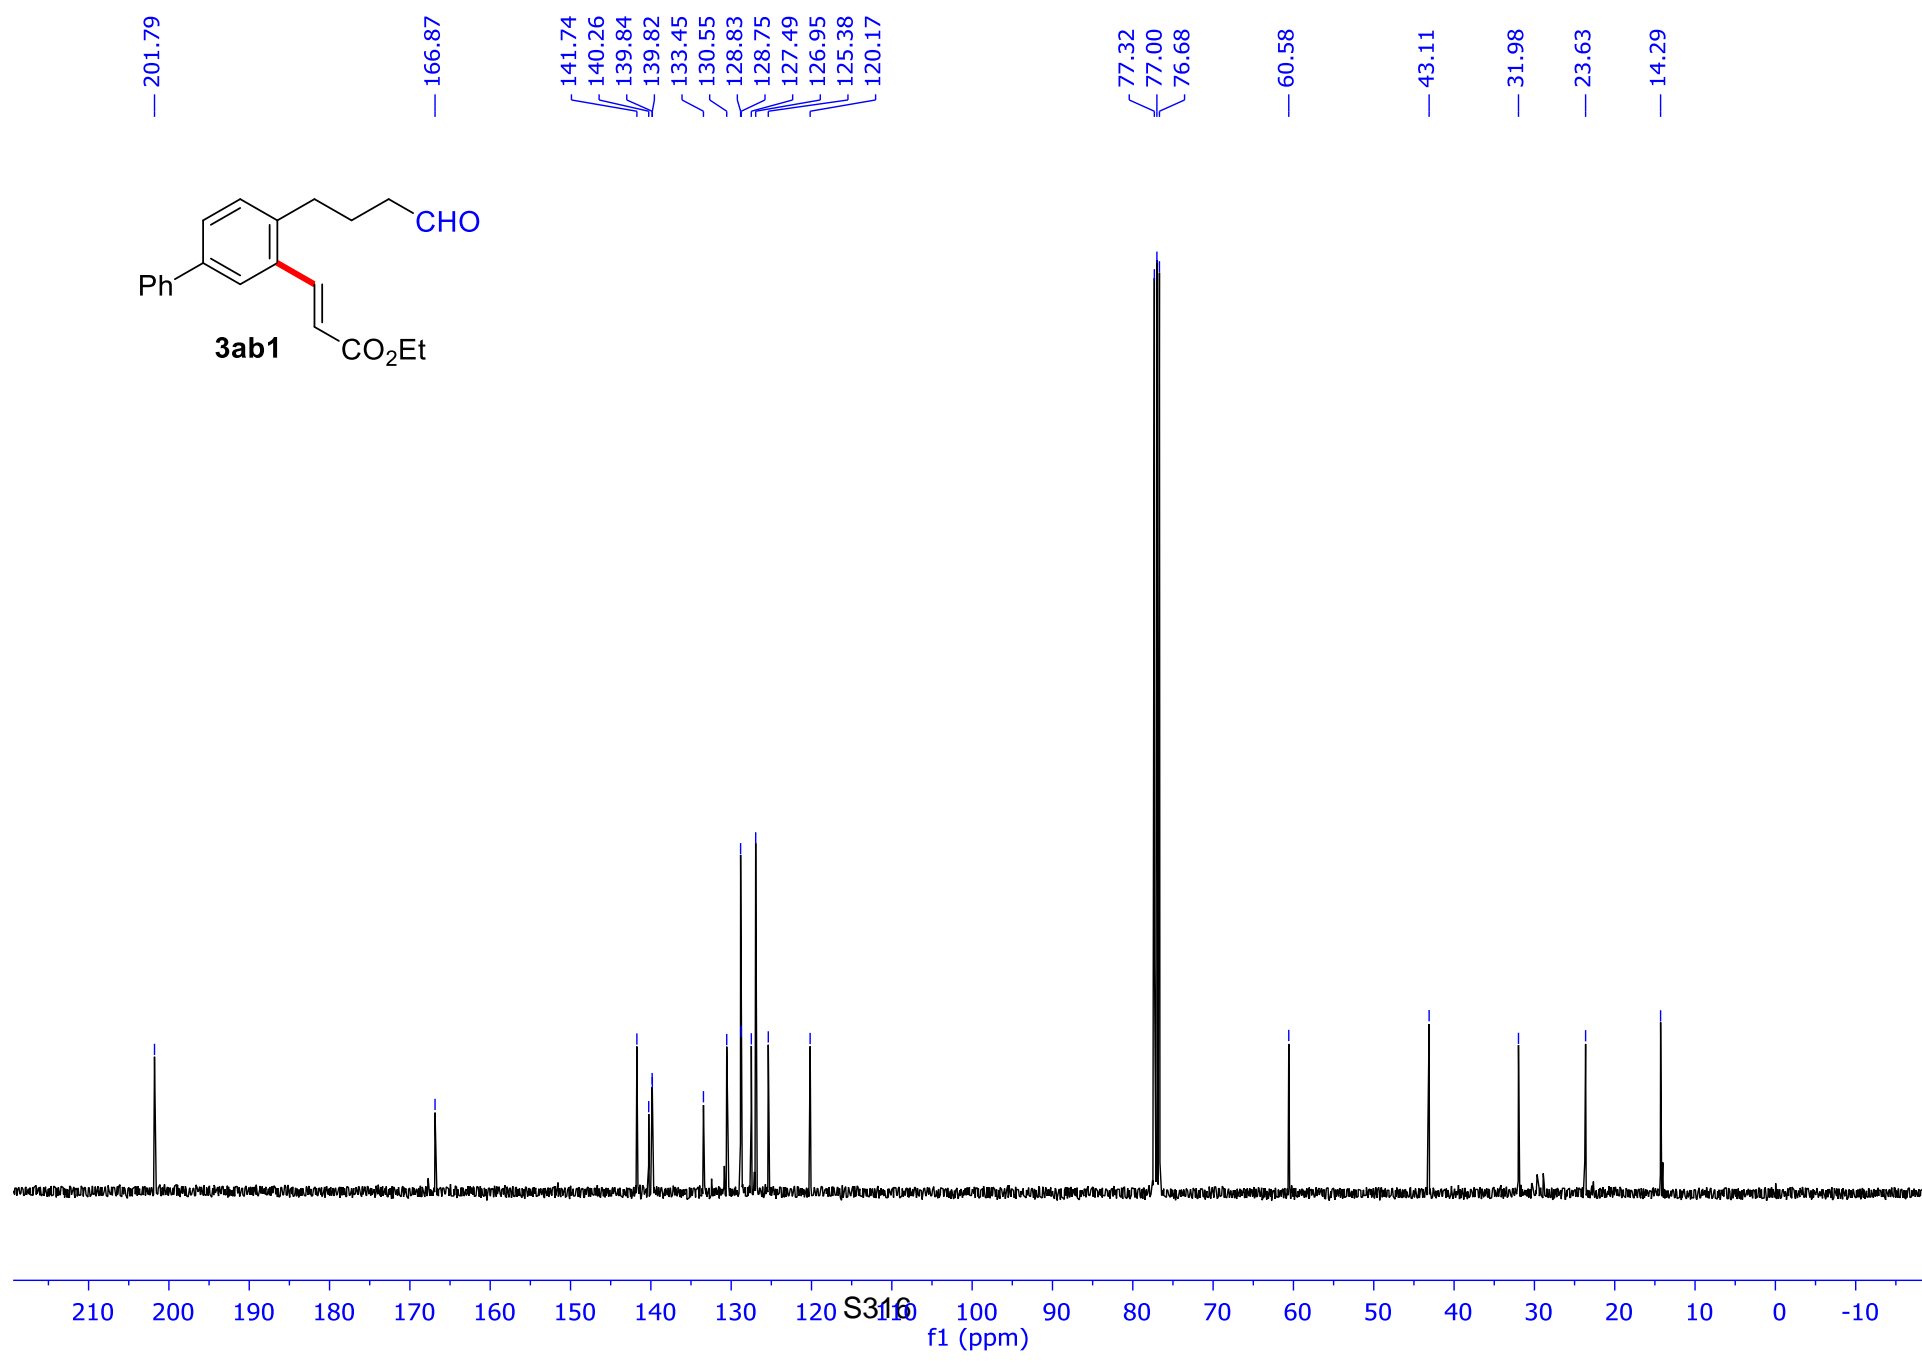

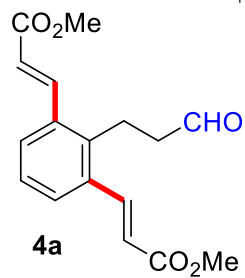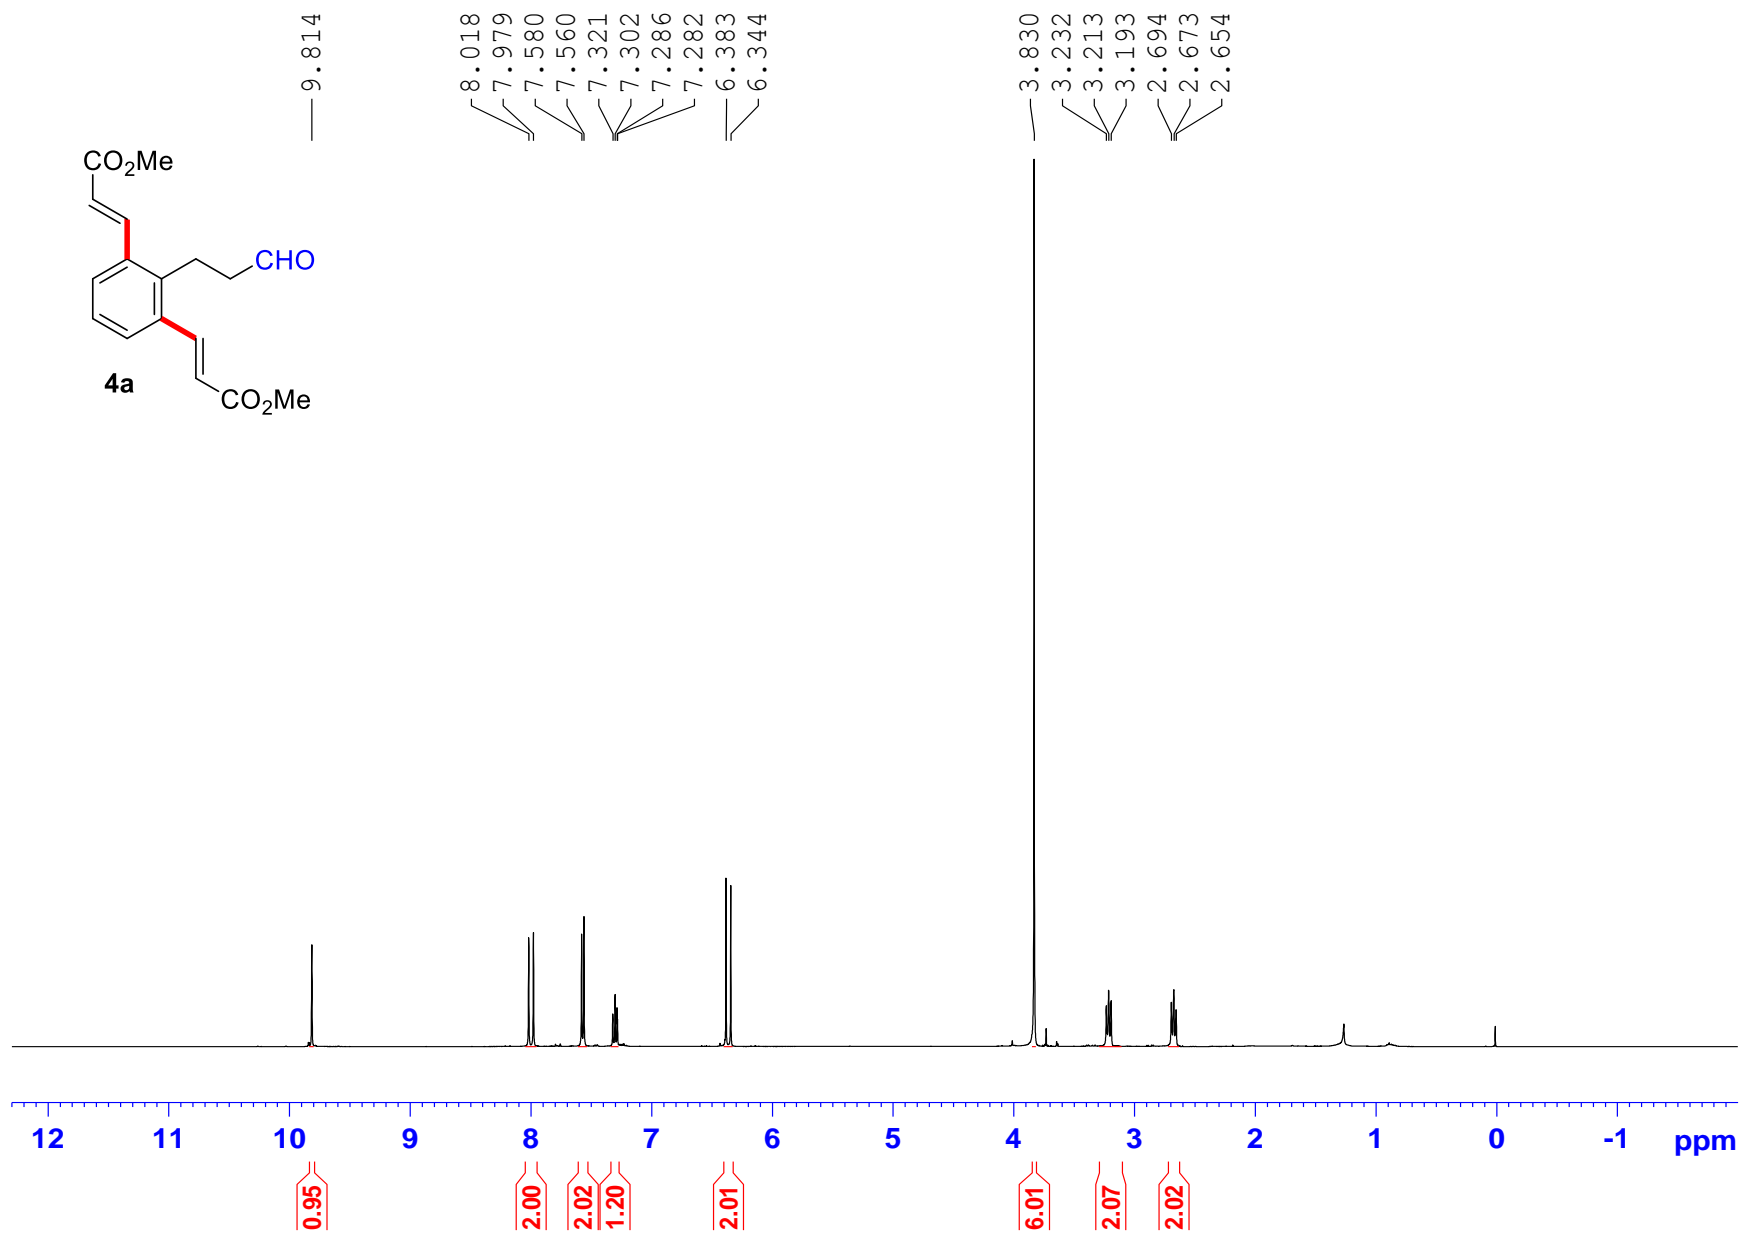

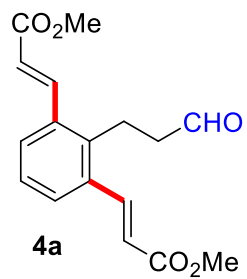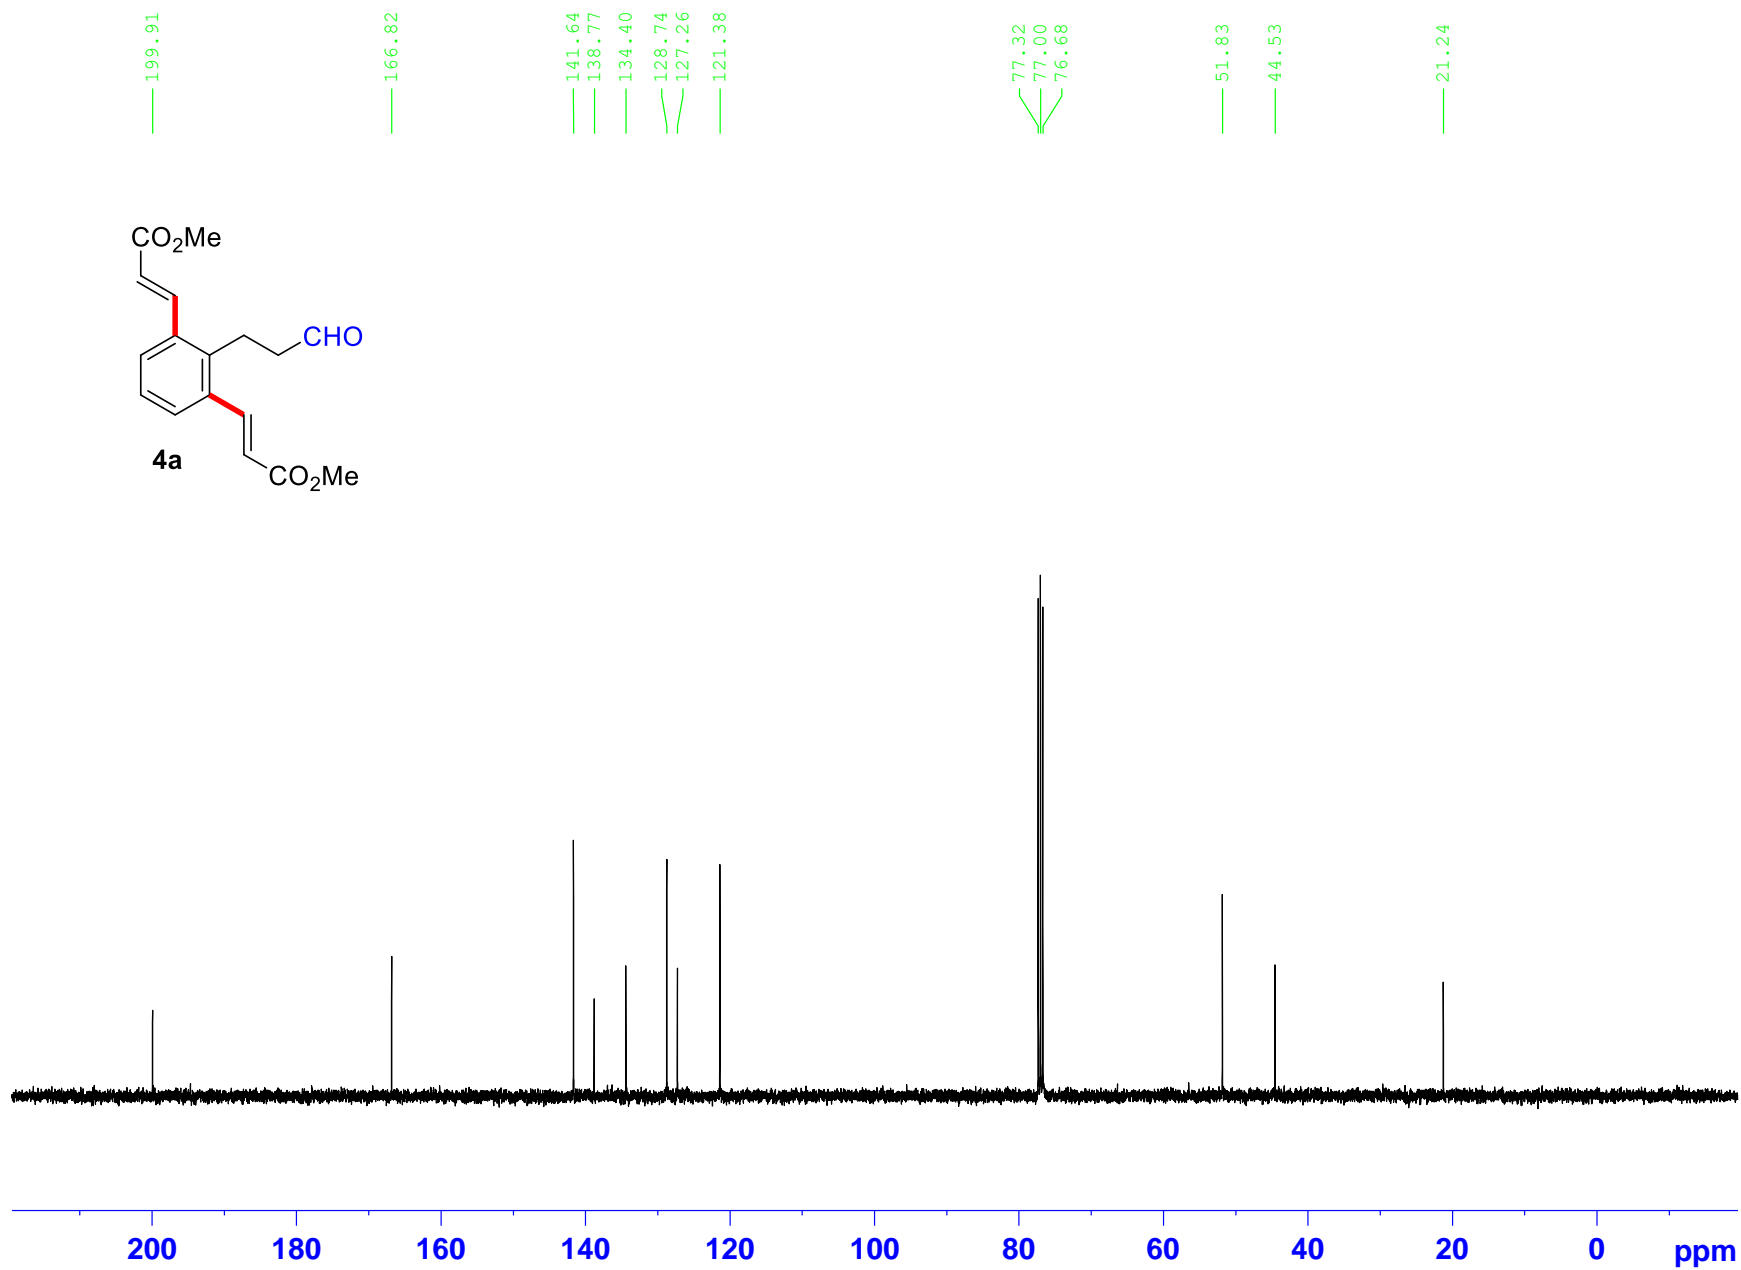

S318

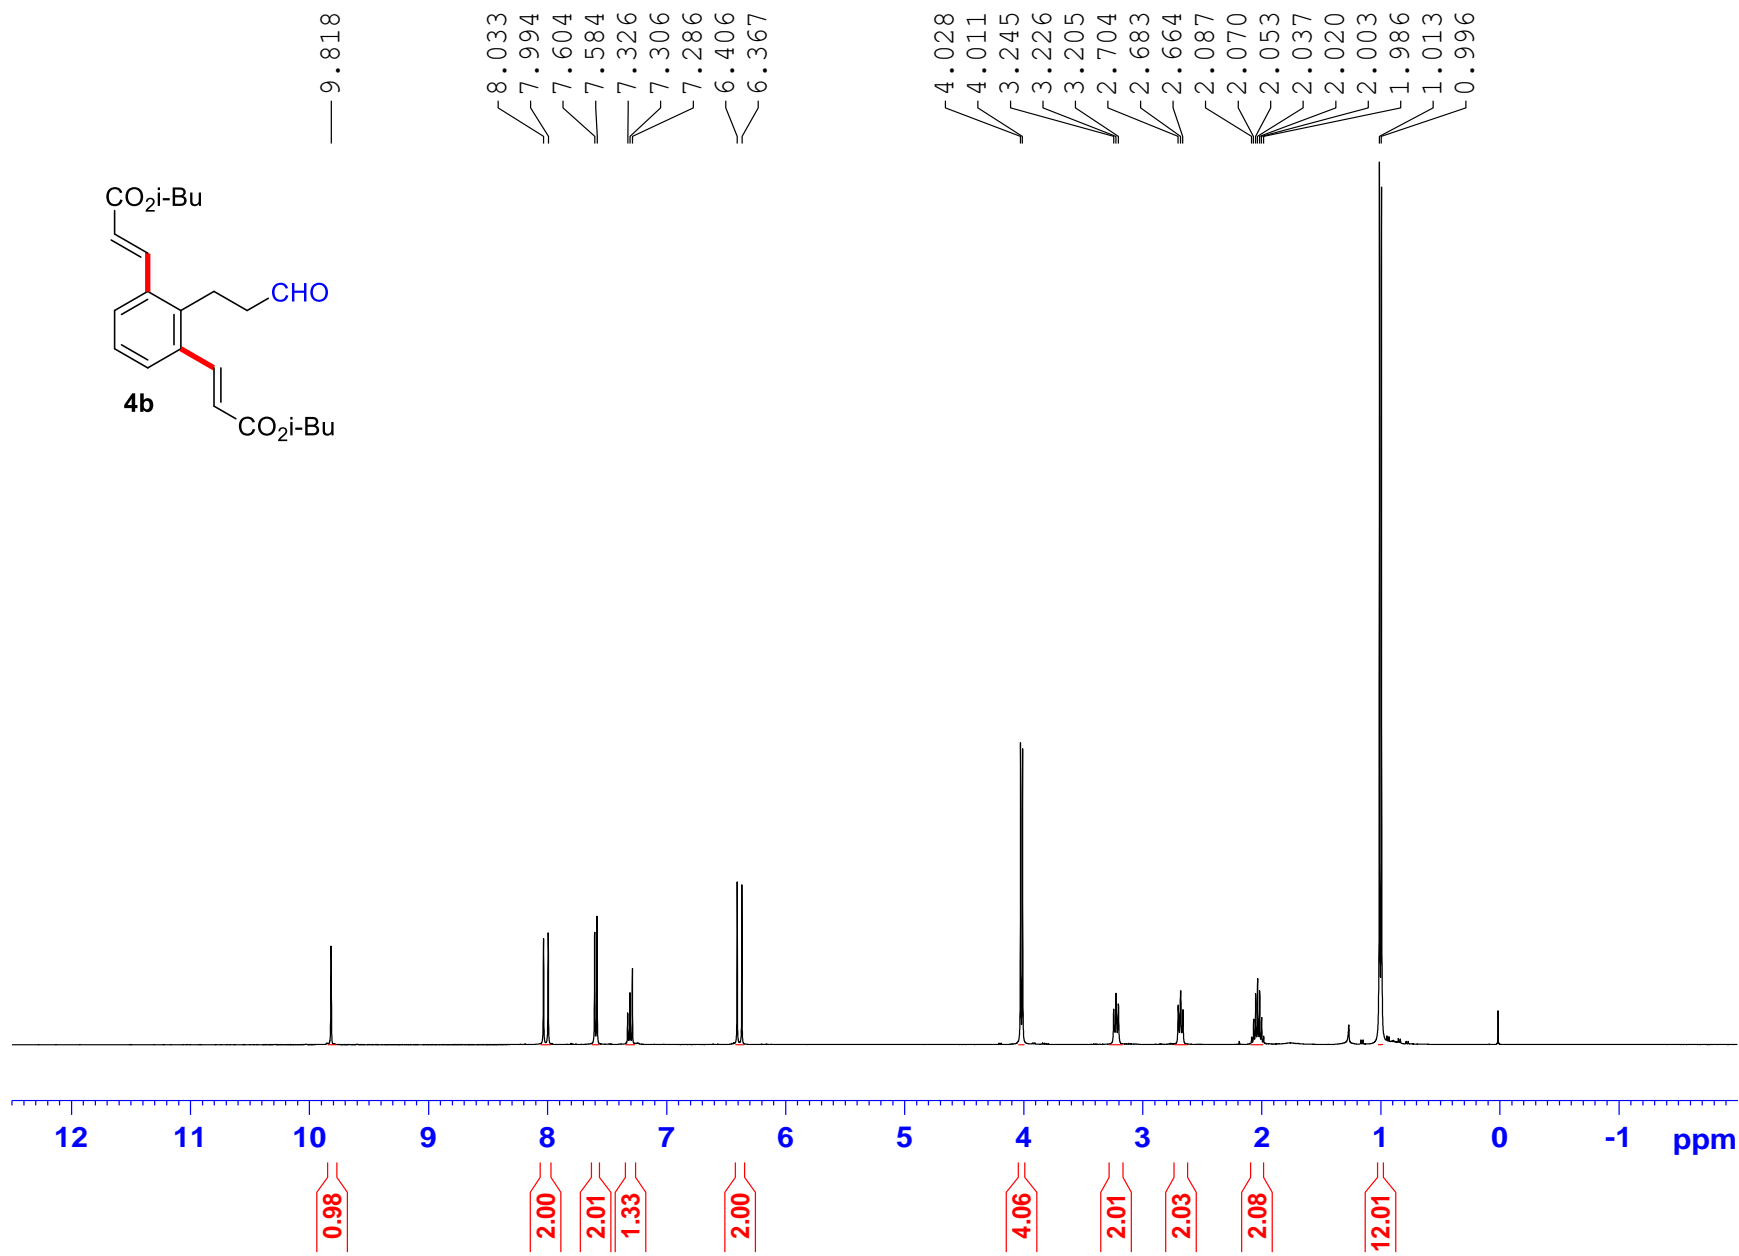

199.76  
166.49  
141.40  
138.73  
134.45  
128.67  
127.22  
121.76  
77.32  
77.00  
76.69  
70.80  
44.55  
27.77  
21.25  
19.10

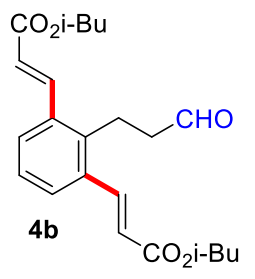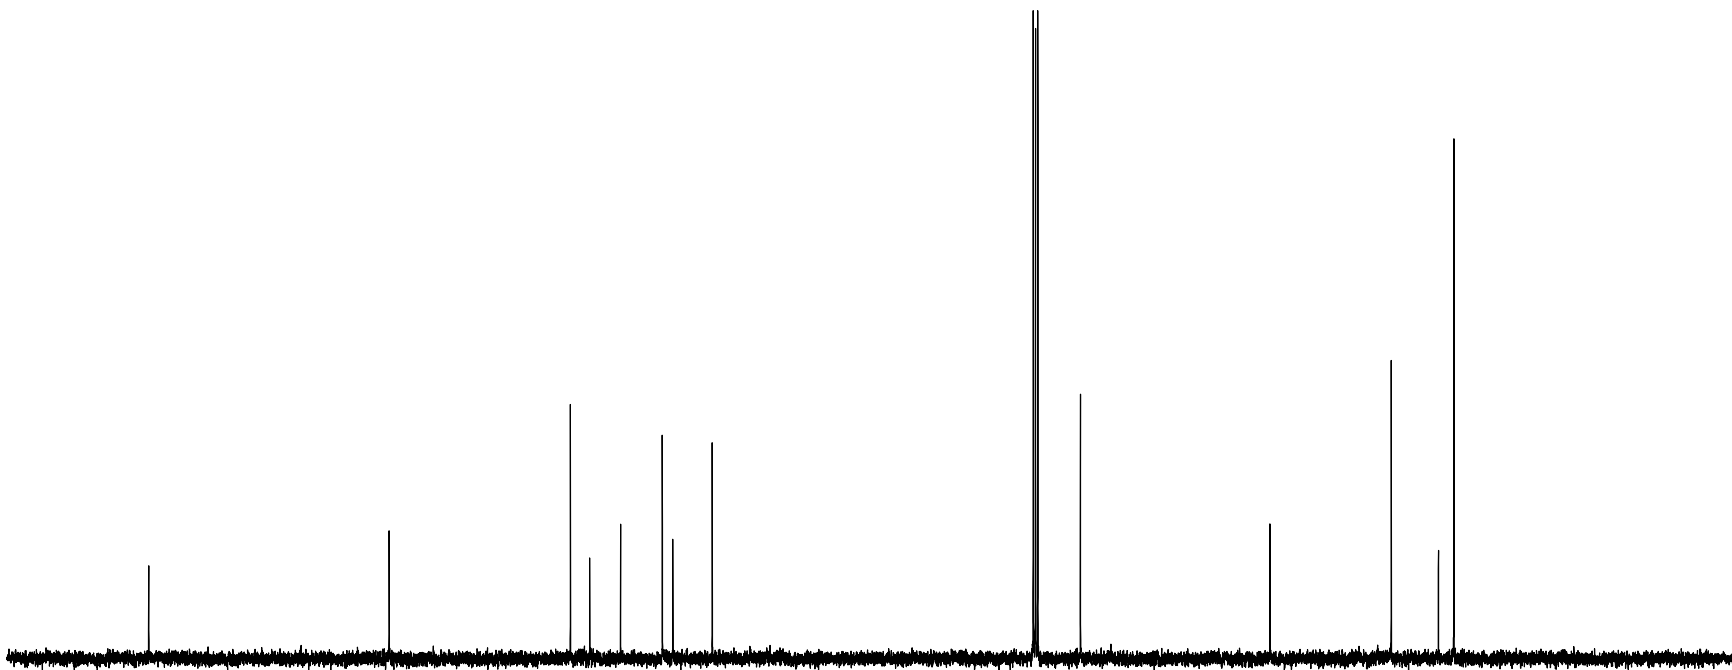

200 180 160 140 120 100 80 60 40 20 0 ppm

S320



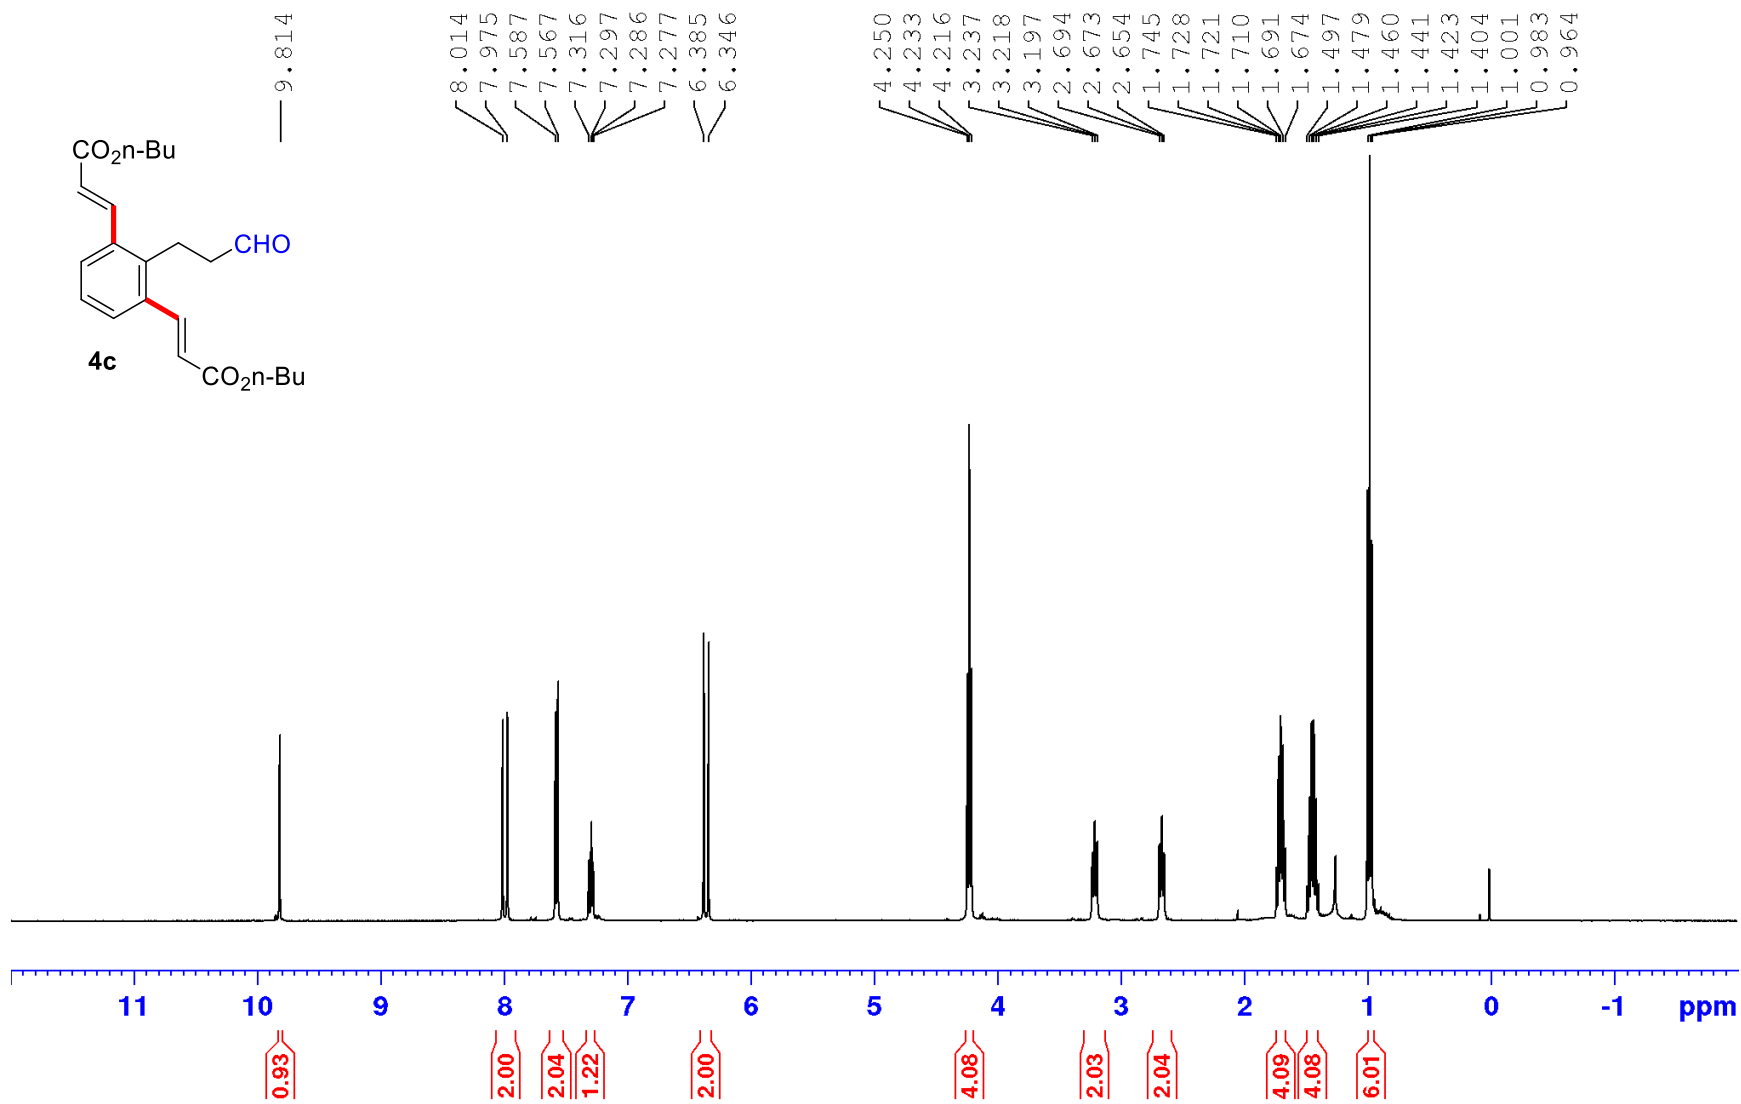

199.80  
166.52  
141.38  
138.73  
134.46  
128.66  
127.21  
121.80  
77.32  
77.00  
76.68  
64.60  
44.55  
30.66  
21.25  
19.15  
13.70

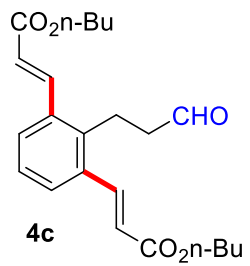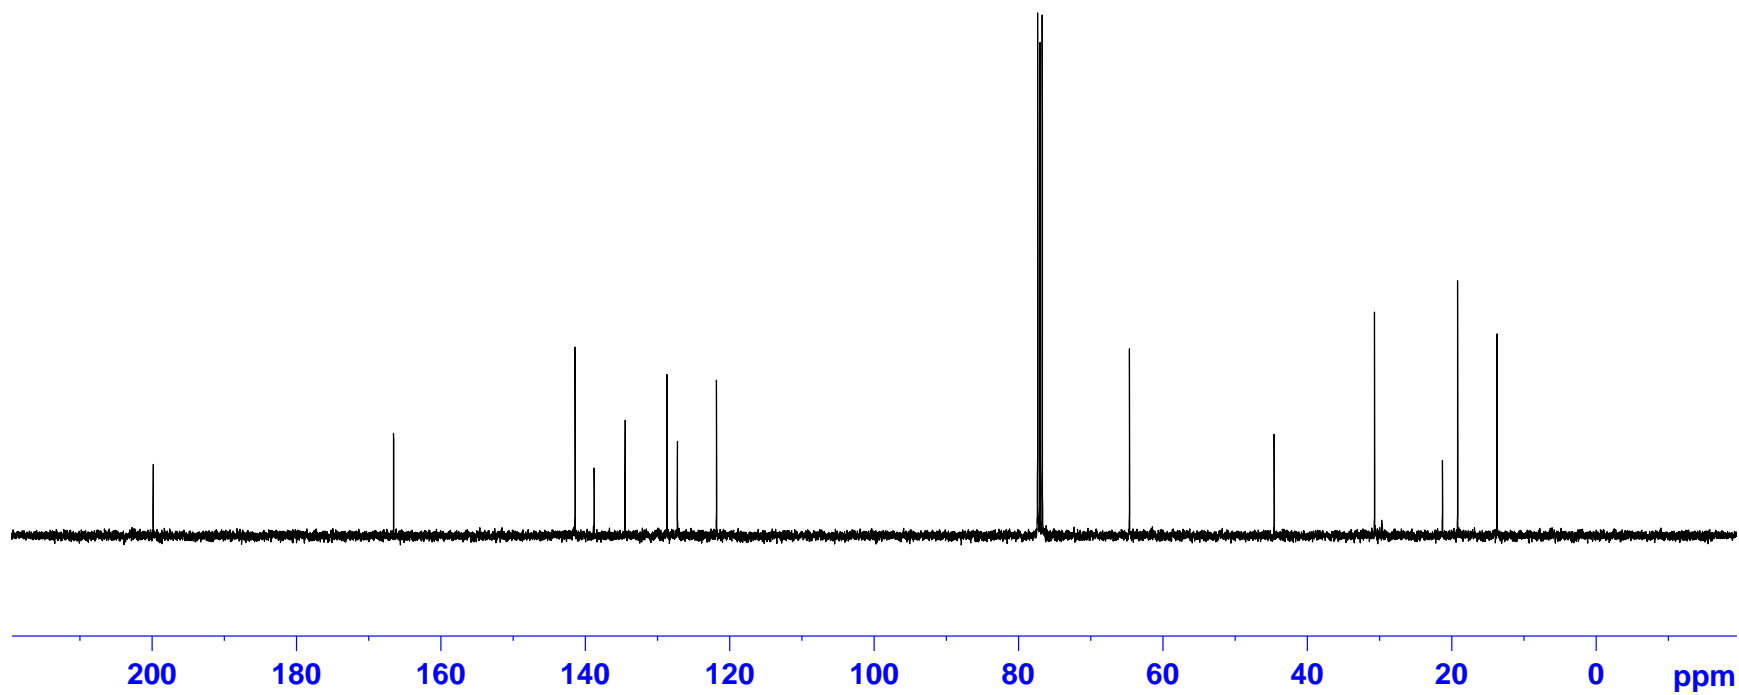

S322

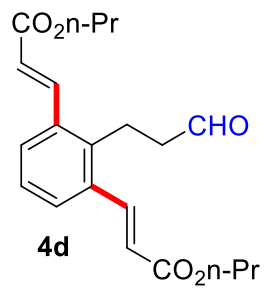

— 9.809

8.016  
 7.977  
 7.585  
 7.566  
 7.314  
 7.294  
 7.285  
 7.274  
 6.387  
 6.348

4.202  
 4.185  
 4.168  
 3.235  
 3.216  
 3.195  
 2.693  
 2.672  
 2.653  
 1.791  
 1.773  
 1.755  
 1.737  
 1.720  
 1.702  
 1.024  
 1.005  
 0.986

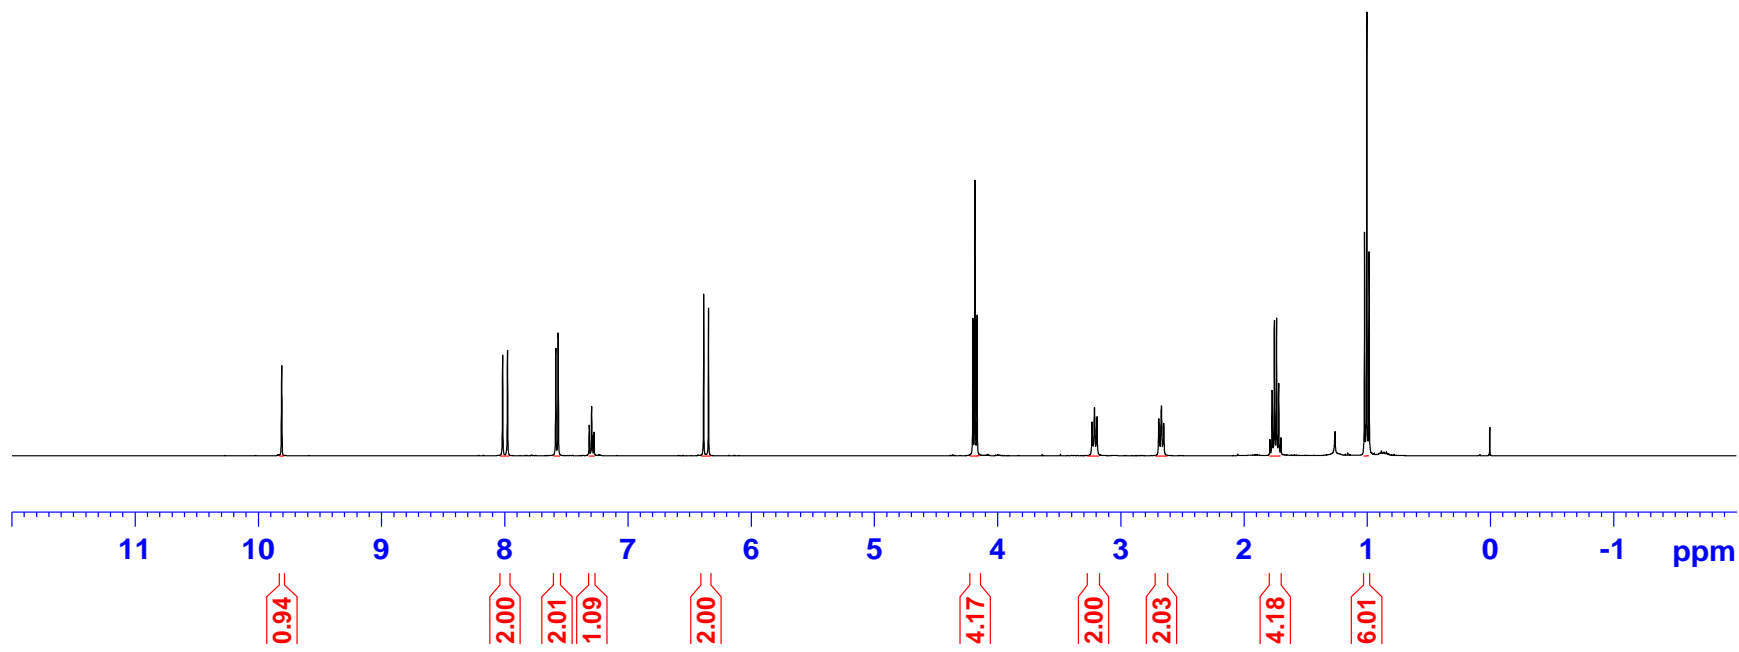

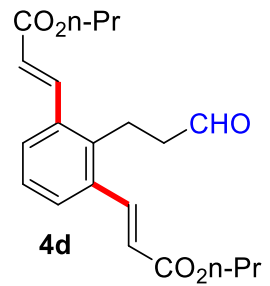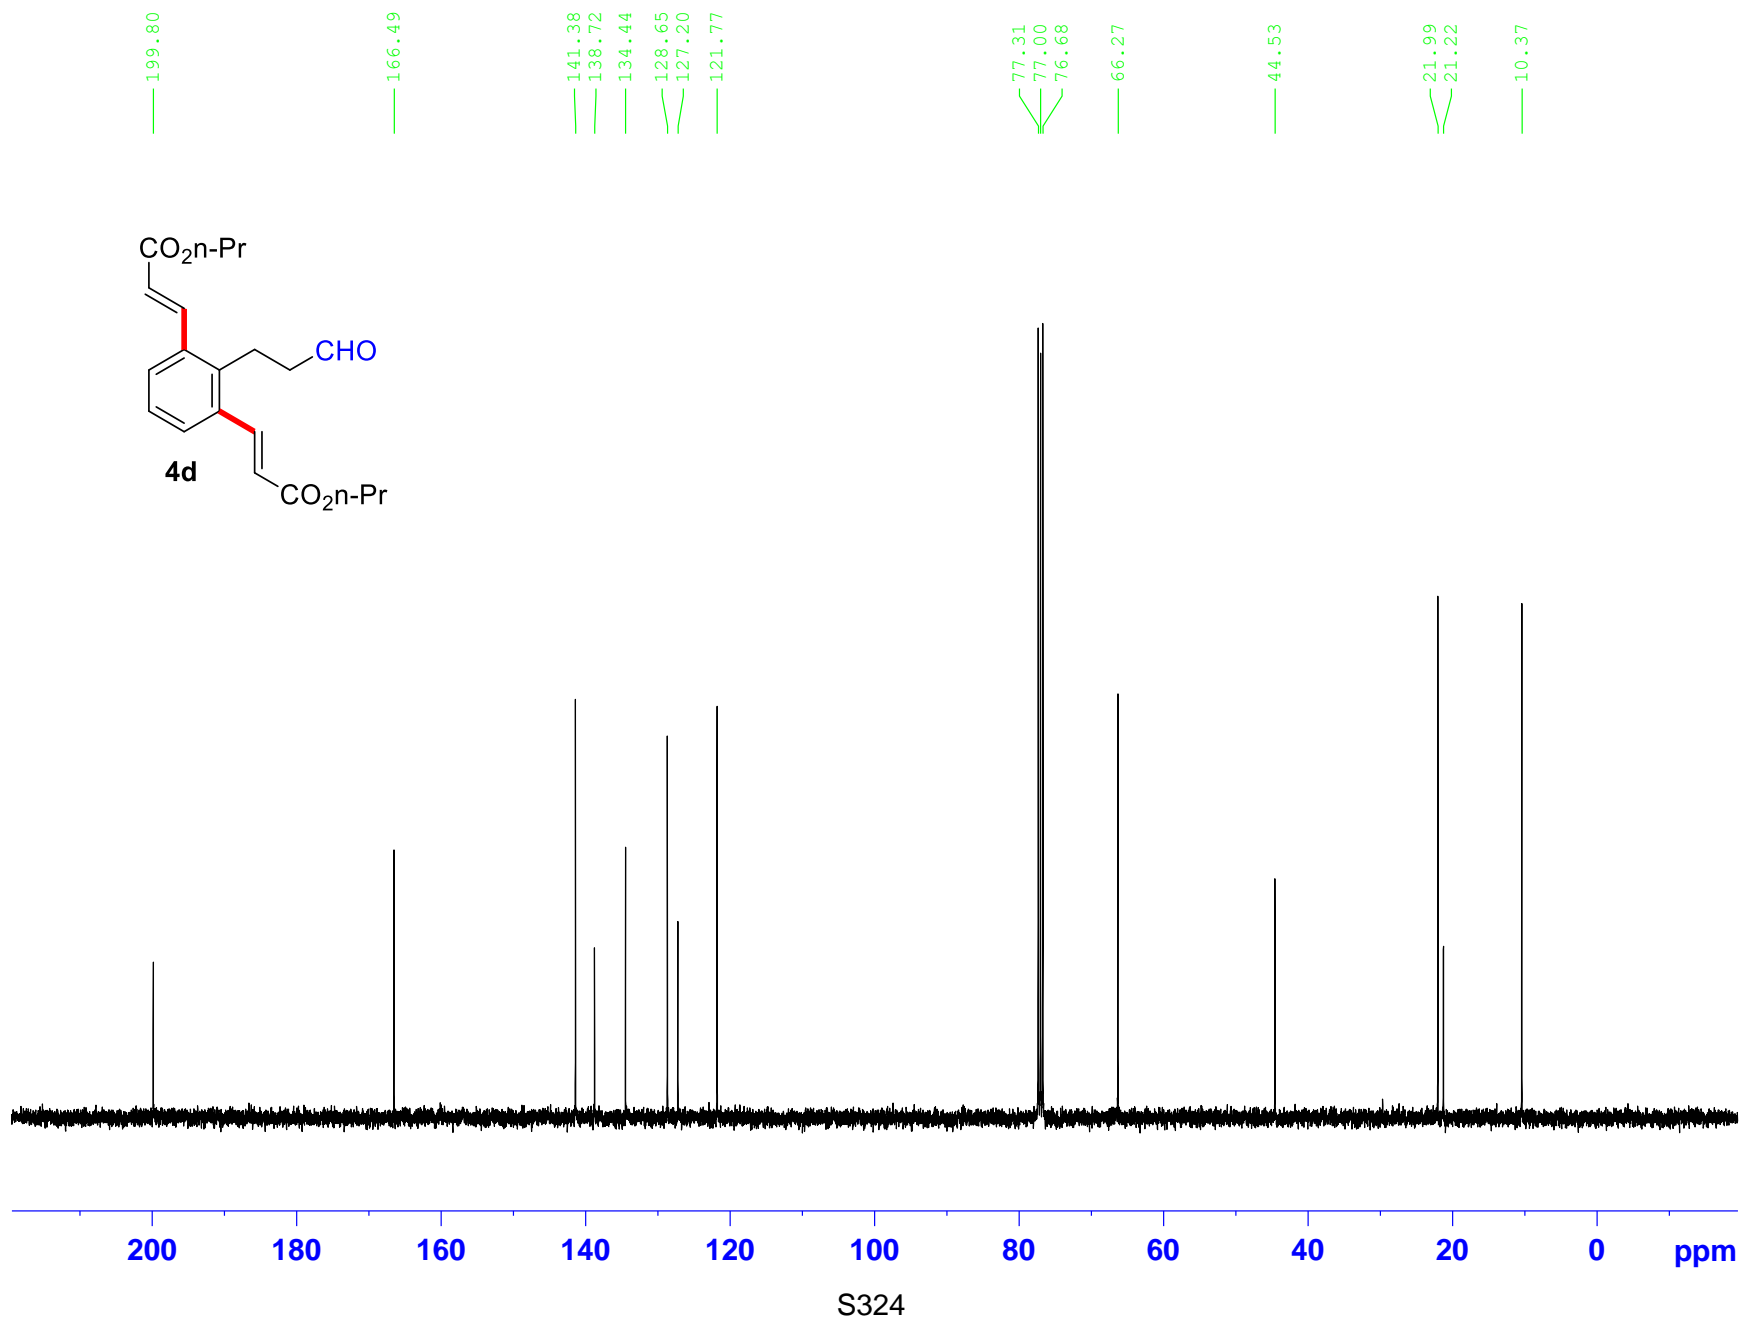

9.823  
8.008  
7.969  
7.590  
7.570  
7.311  
7.292  
7.286  
7.272  
6.381  
6.341  
4.937  
4.924  
4.914  
4.904  
4.892  
3.247  
3.228  
3.207  
2.703  
2.683  
2.664  
1.950  
1.939  
1.926  
1.917  
1.800  
1.789  
1.776  
1.769  
1.607  
1.597  
1.590  
1.583  
1.575  
1.567  
1.560  
1.541  
1.535  
1.510  
1.480  
1.473  
1.465  
1.455  
1.448  
1.440  
1.422  
1.415  
1.389  
1.357  
1.333  
1.327  
1.301

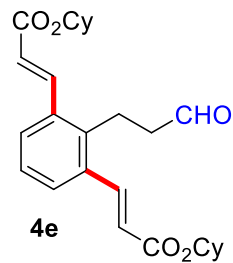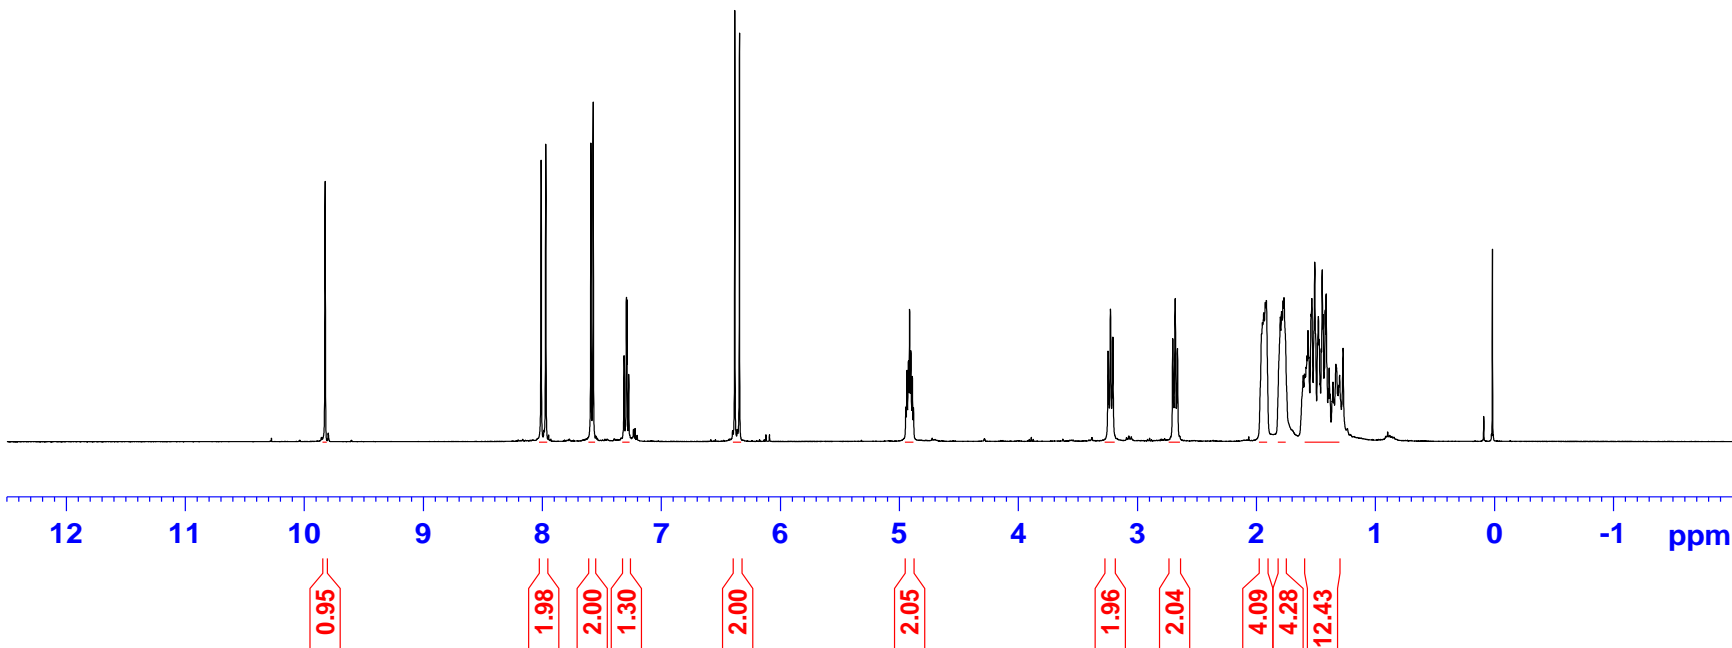

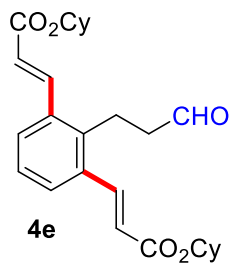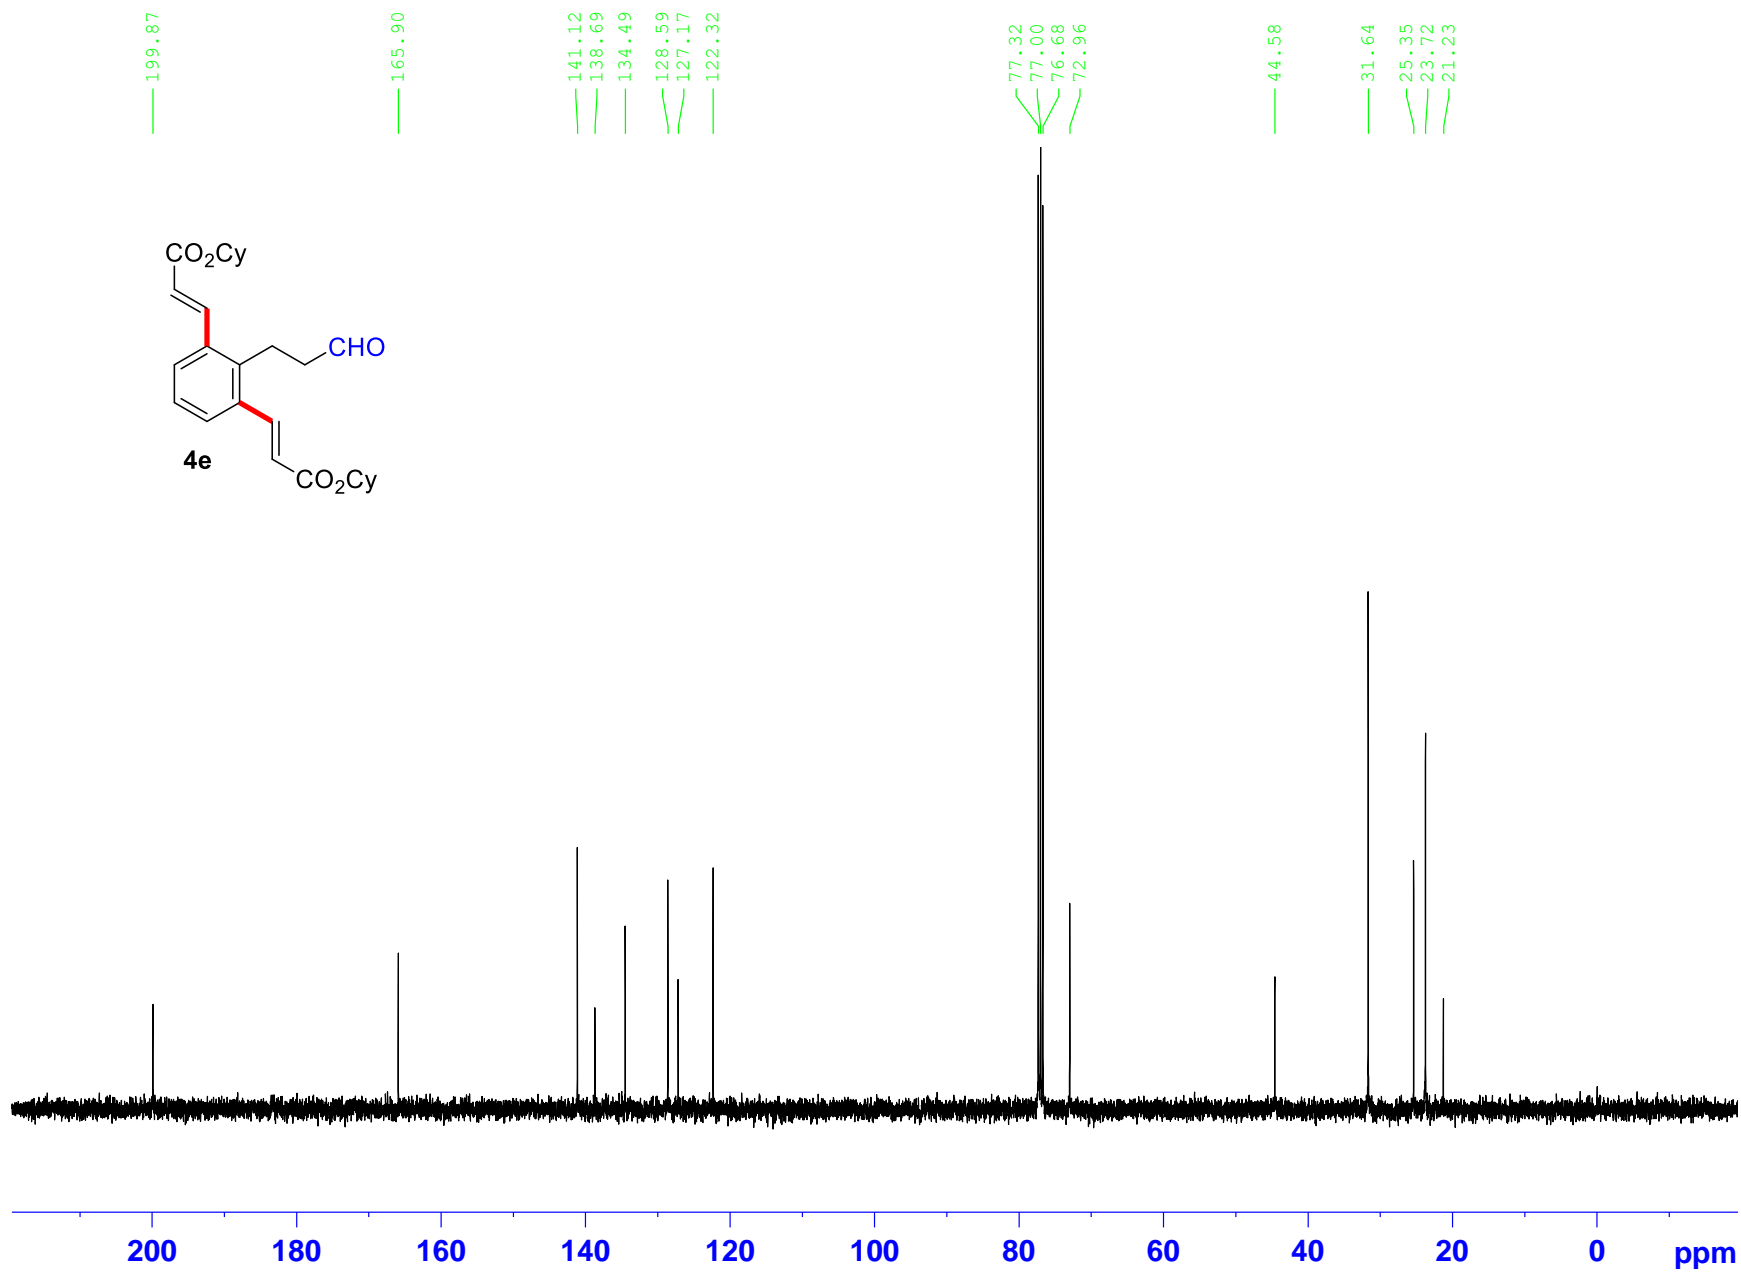

S326

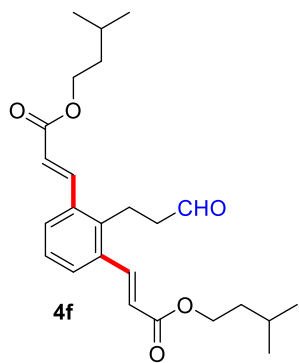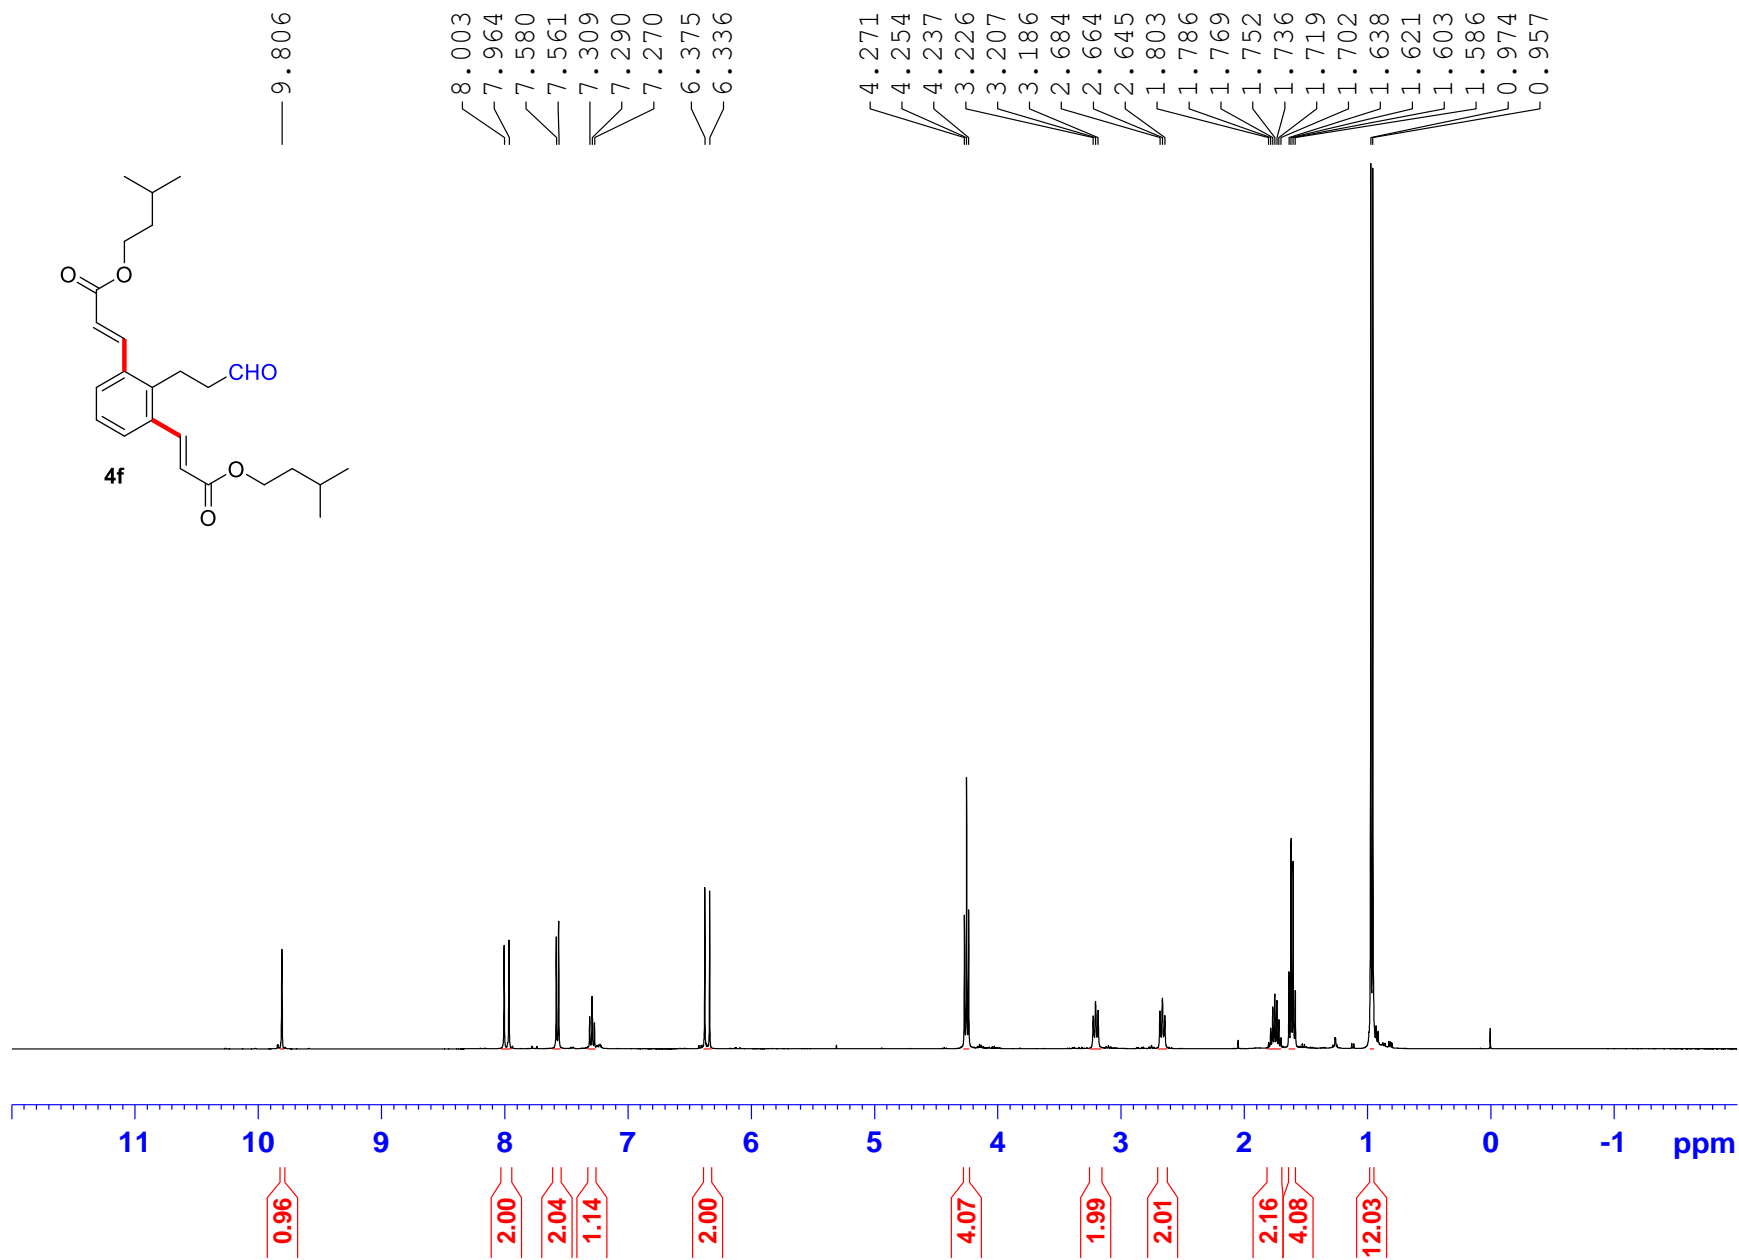

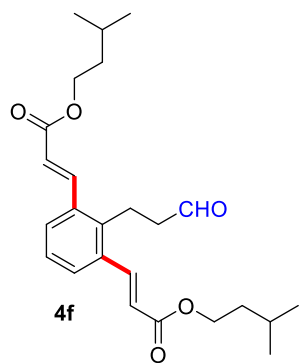

199.75

166.46

141.34

138.71

134.41

128.63

127.19

121.77

77.32

77.00

76.68

63.38

44.53

37.28

25.11

22.44

21.22

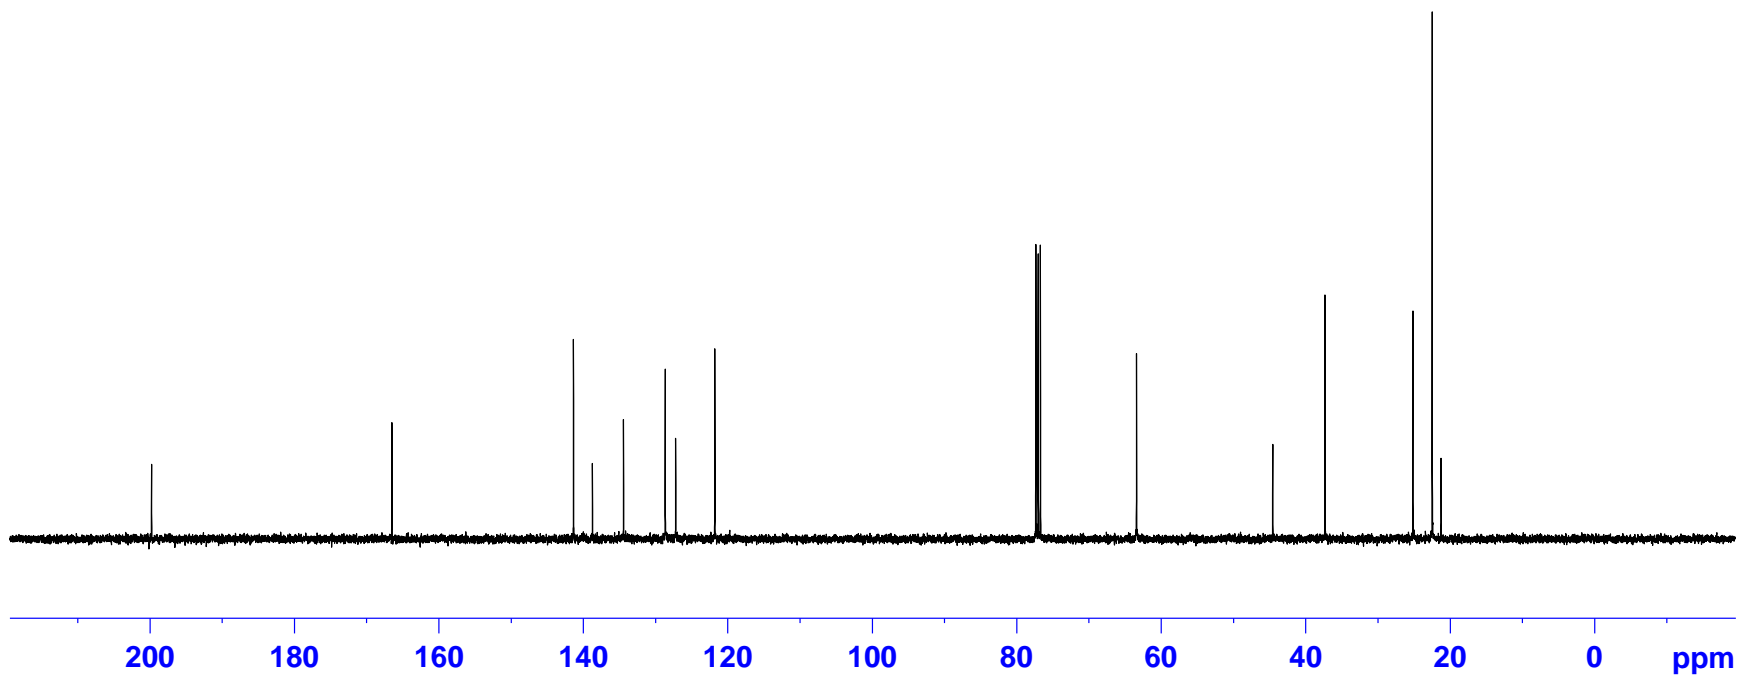

S328



9.824  
8.082  
8.043  
7.779  
7.760  
7.395  
7.376  
7.356  
6.498  
6.458  
4.180  
4.166  
4.152  
4.141  
4.138  
4.127  
4.114  
4.099  
3.260  
3.241  
3.220  
2.865  
2.781  
2.760  
2.742  
2.073  
2.067  
2.062  
1.689  
1.674  
1.659  
1.486  
1.467  
1.459  
1.448  
1.442  
1.441  
1.432  
1.424  
1.413  
1.406  
1.390  
1.382  
1.376  
1.367  
1.359  
1.349  
1.343  
0.969  
0.940  
0.931  
0.923  
0.905

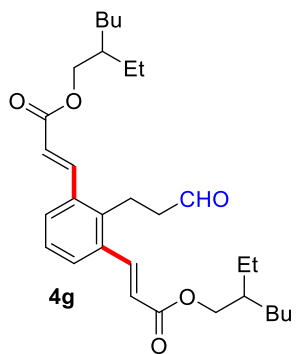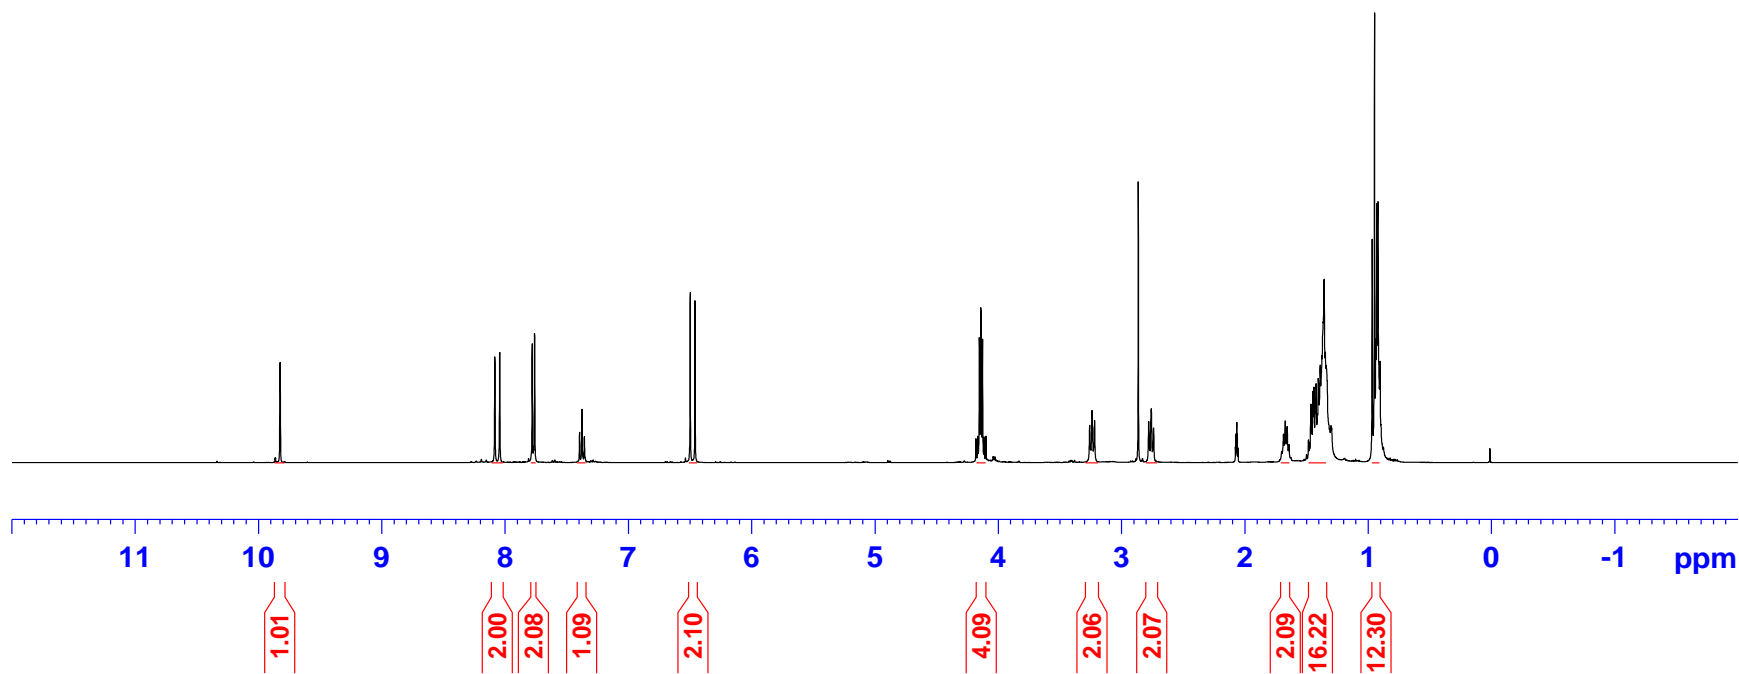

S329

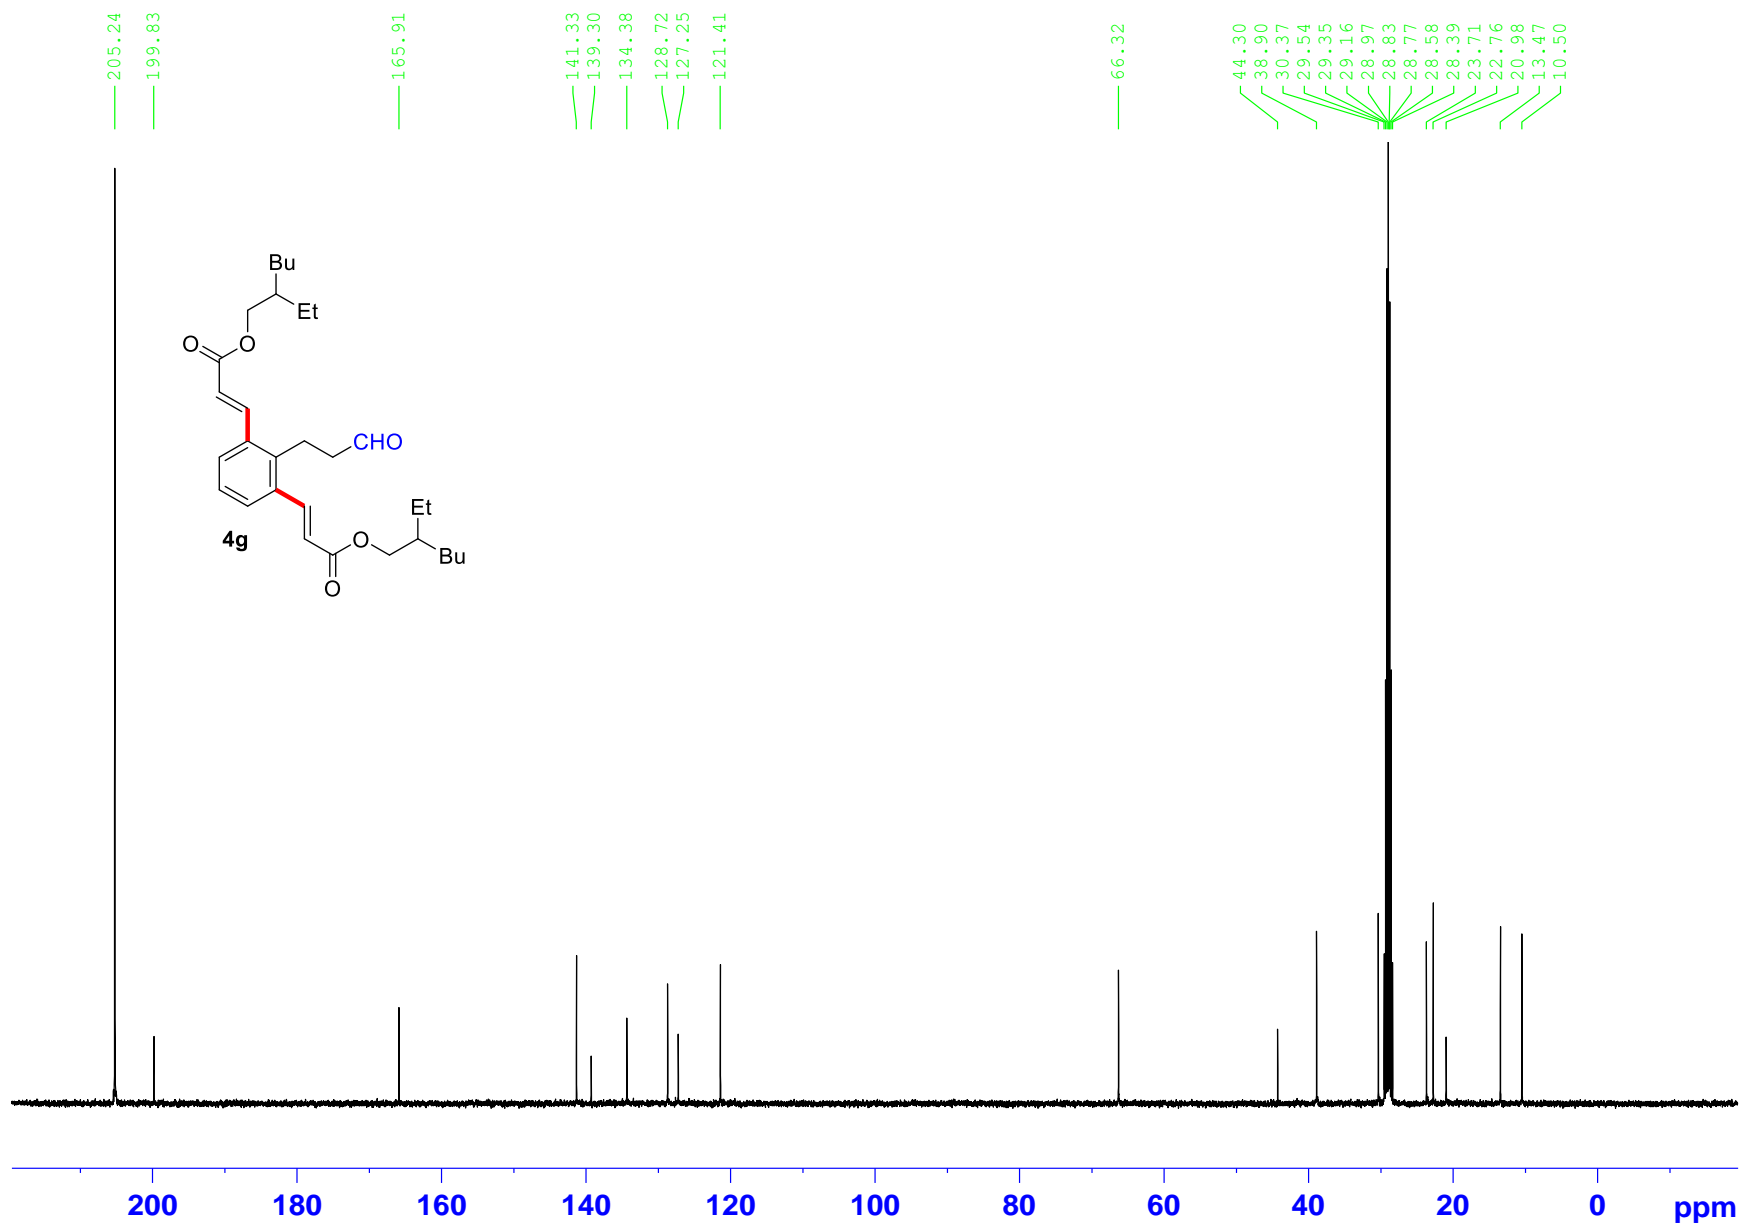

S330

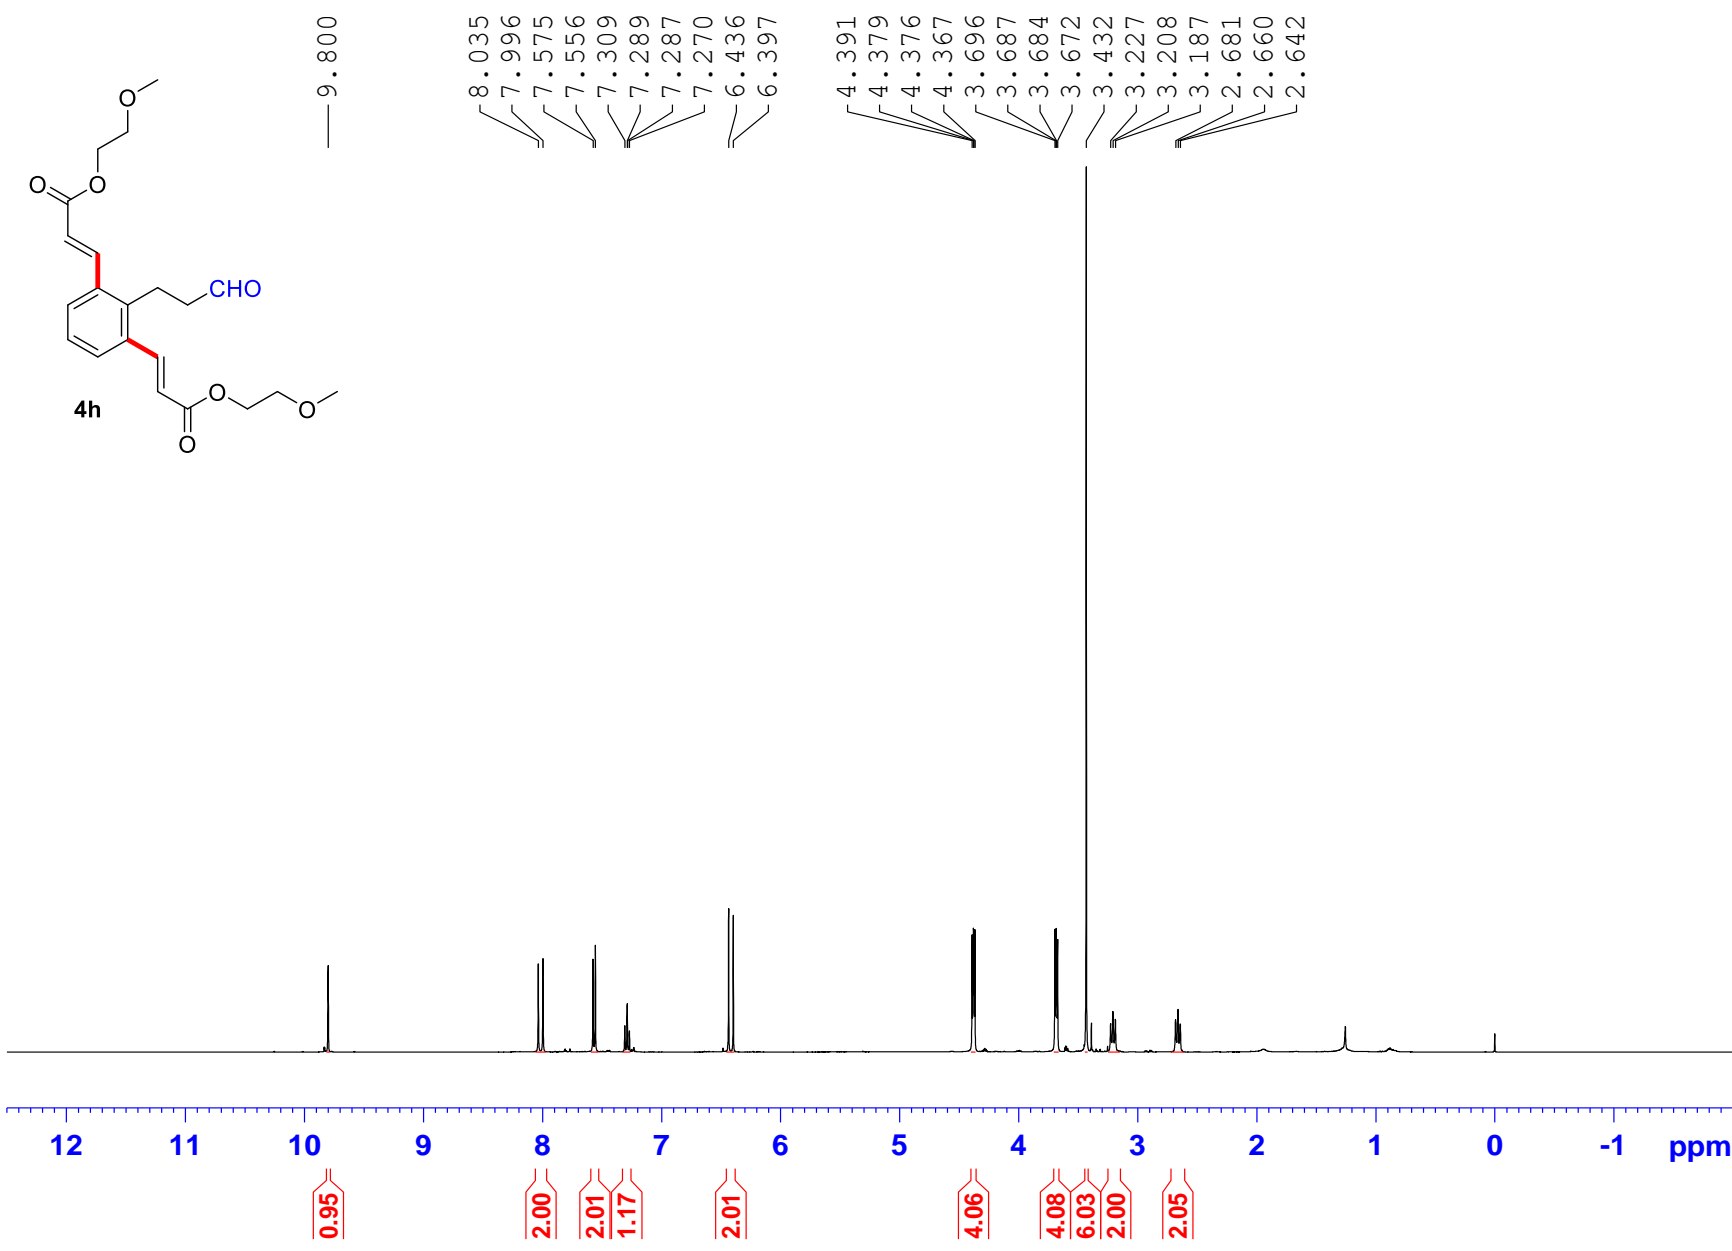

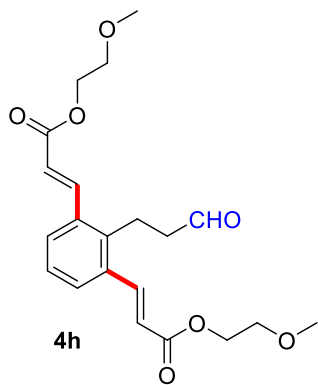

199.79

166.36

141.90

138.88

134.33

128.75

127.25

121.29

77.32

77.00

76.68

70.39

63.71

58.98

44.55

21.19

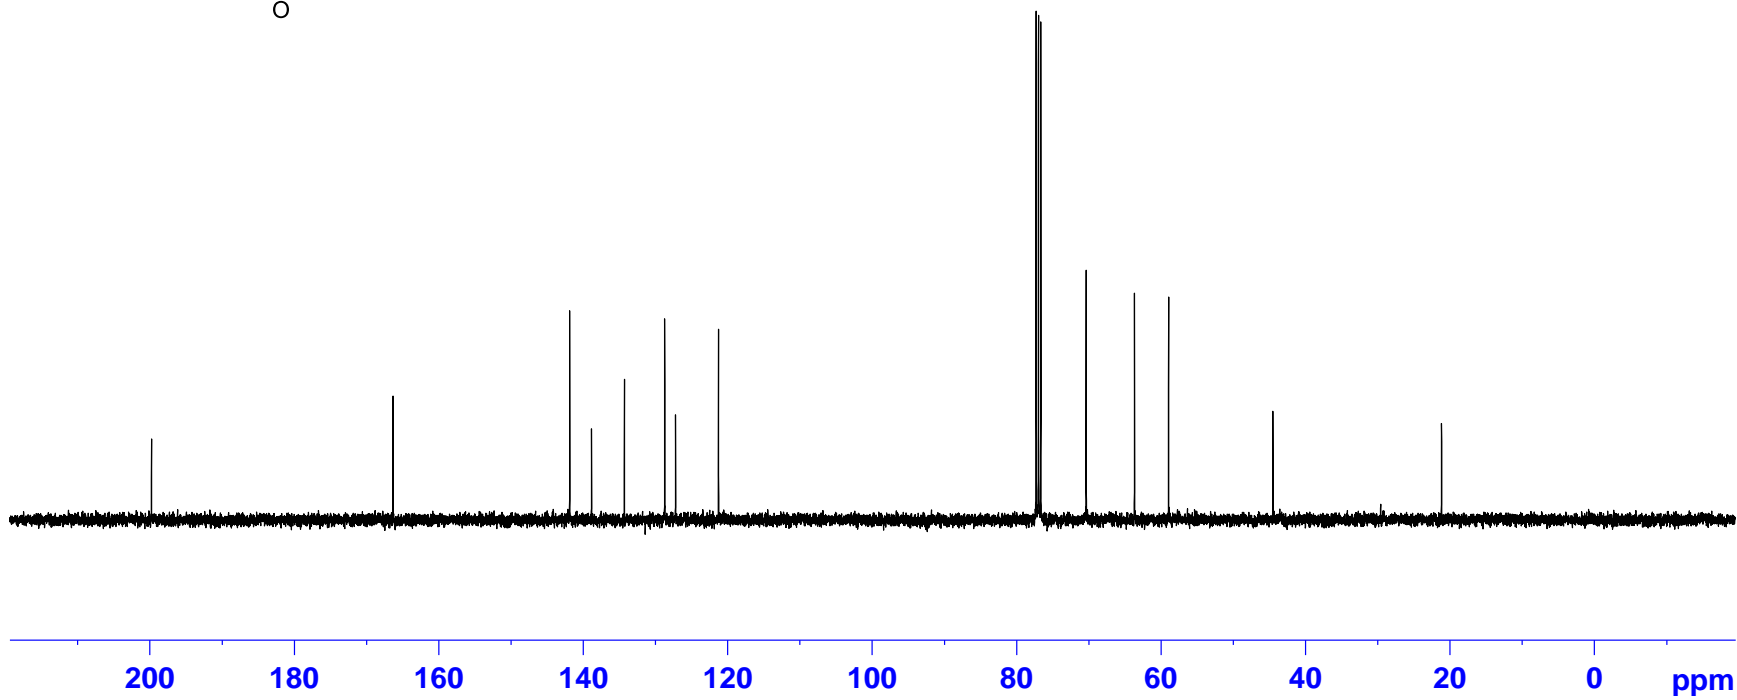

S332

9.797  
8.032  
7.993  
7.572  
7.552  
7.307  
7.286  
6.433  
6.394  
4.324  
4.317  
4.297  
4.289  
4.223  
4.215  
4.206  
4.199  
4.188  
4.182  
4.172  
4.155  
4.145  
4.127  
3.953  
3.936  
3.933  
3.916  
3.899  
3.859  
3.841  
3.825  
3.805  
3.221  
3.202  
3.182  
2.677  
2.657  
2.638  
2.068  
2.056  
2.048  
2.035  
2.019  
1.978  
1.974  
1.969  
1.961  
1.954  
1.943  
1.923  
1.697  
1.675  
1.666  
1.646

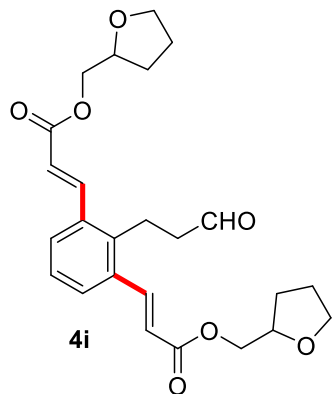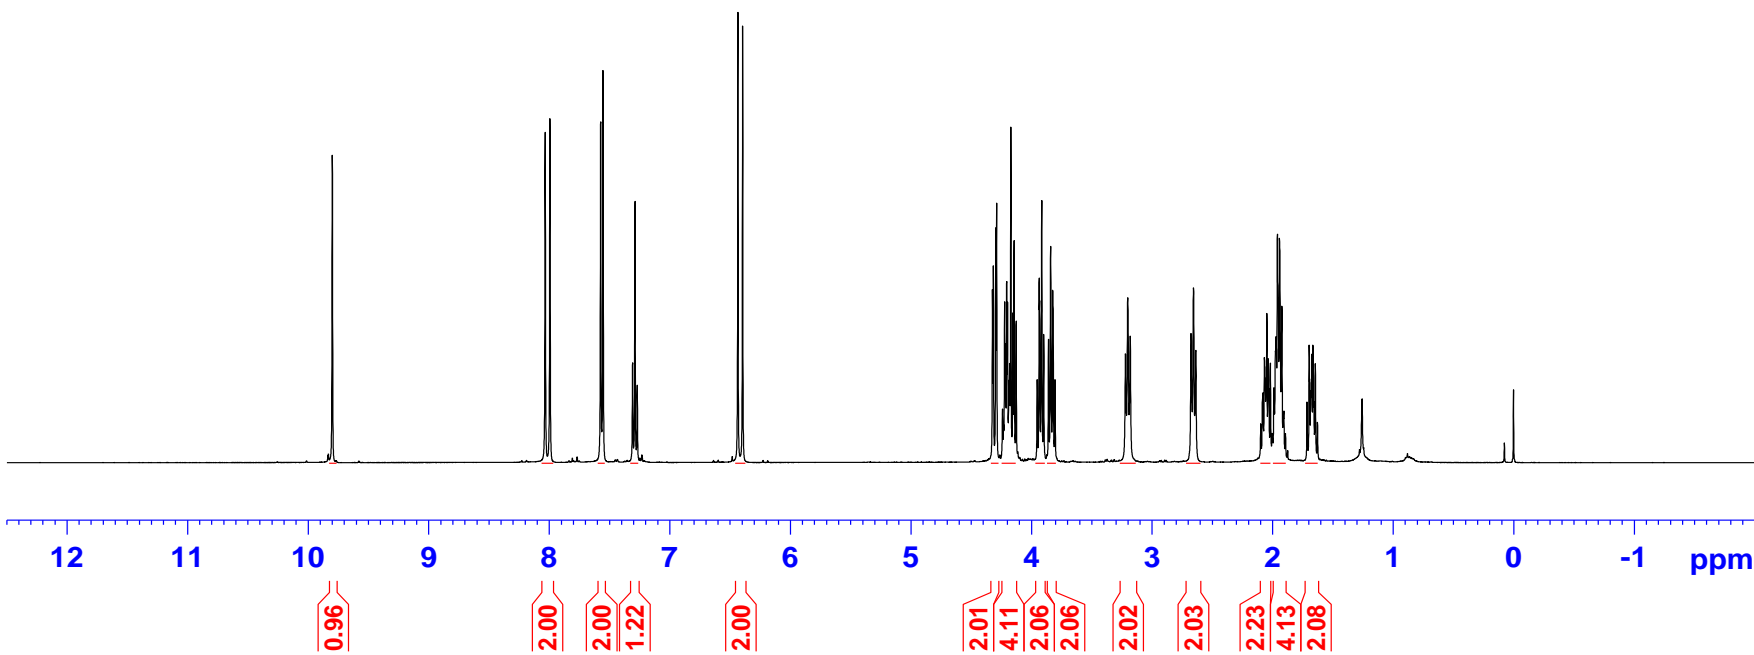

S333

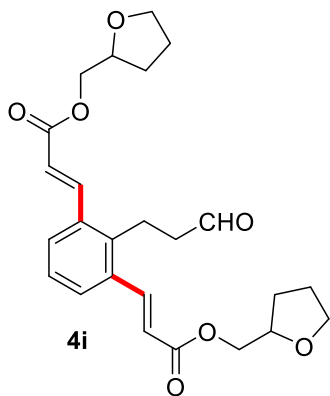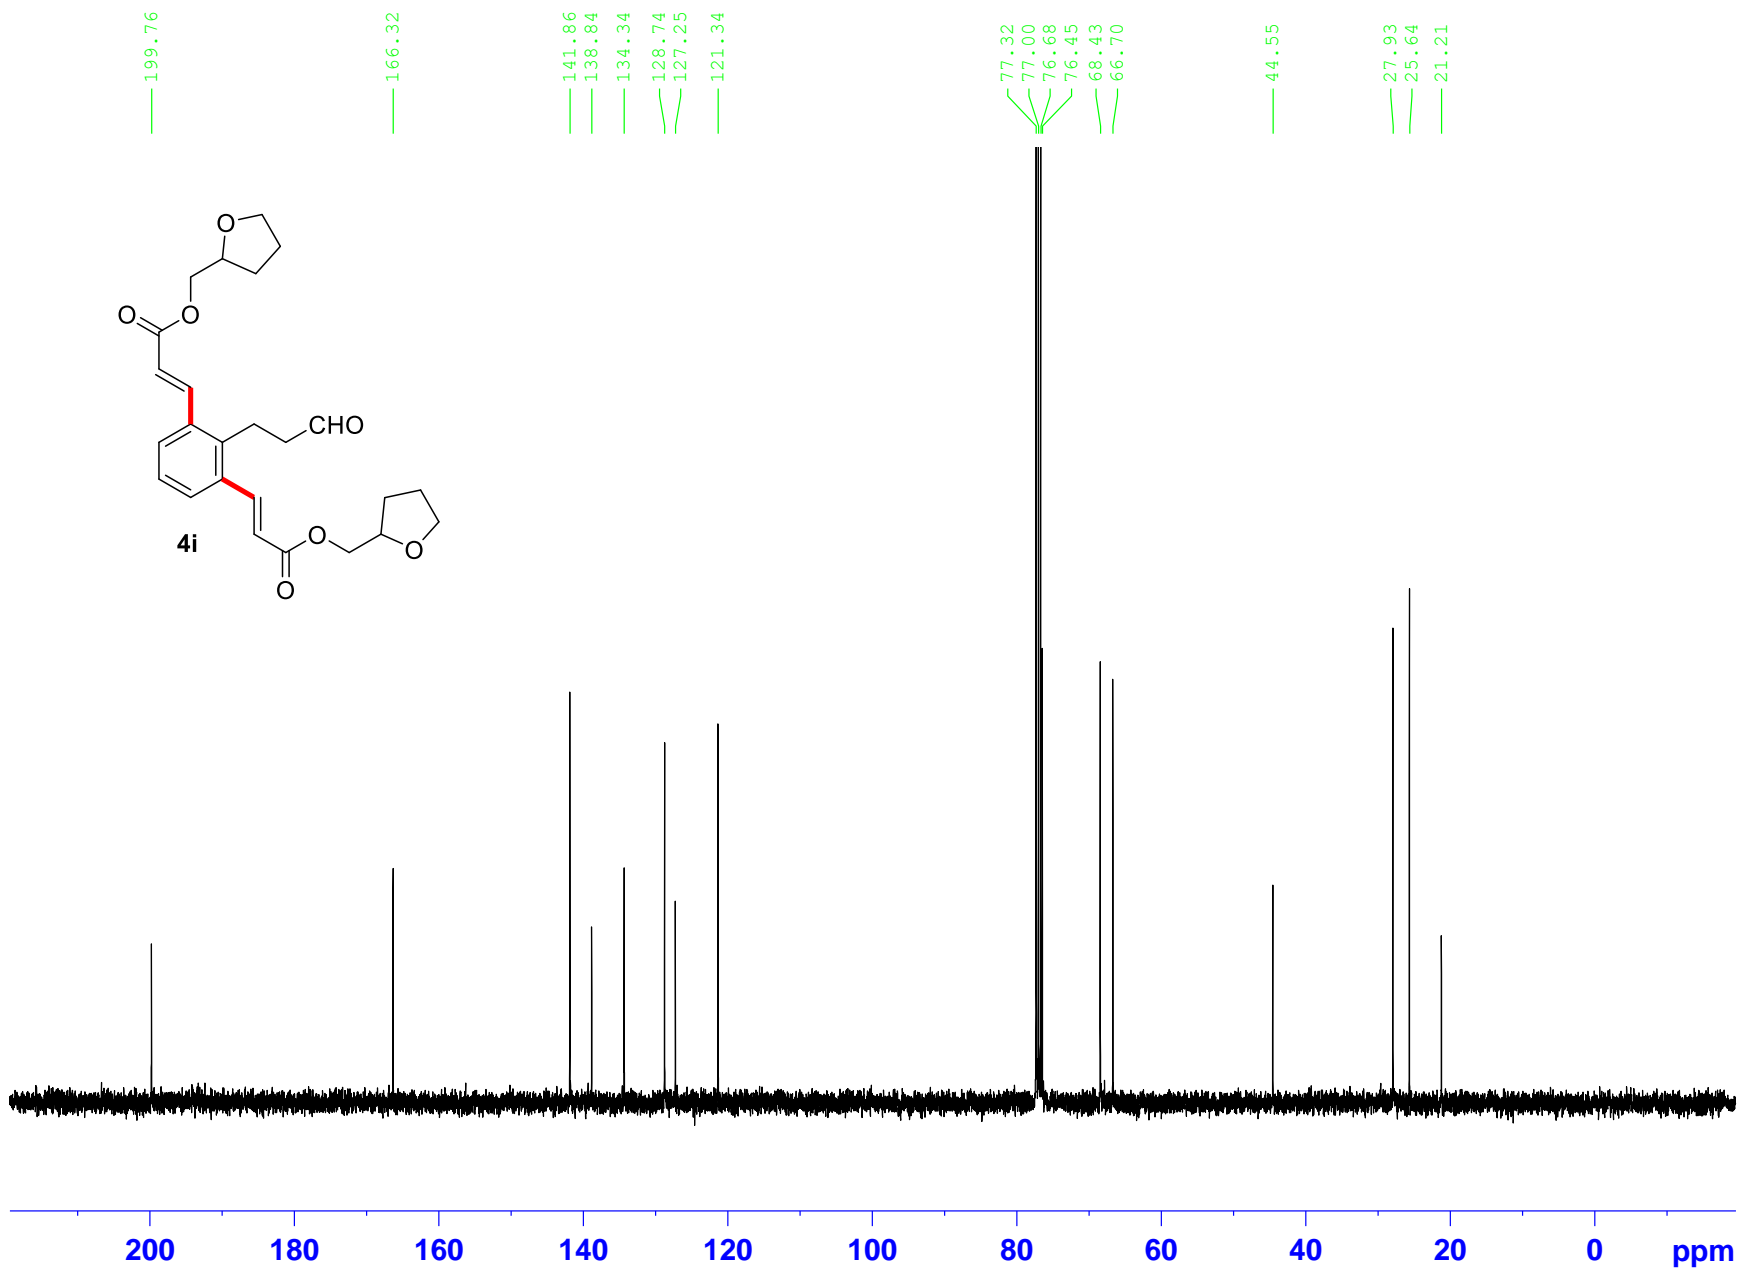

S334

9.773  
8.003  
7.964  
7.552  
7.532  
7.280  
7.260  
7.241  
6.423  
6.384  
4.223  
4.215  
4.194  
4.185  
4.151  
4.134  
4.122  
4.105  
4.028  
4.023  
4.005  
4.000  
3.994  
3.609  
3.601  
3.592  
3.479  
3.457  
3.451  
3.429  
3.423  
3.199  
3.180  
3.159  
2.653  
2.632  
2.613  
1.886  
1.875  
1.864  
1.613  
1.605  
1.579  
1.574  
1.569  
1.562  
1.552  
1.540  
1.533  
1.524  
1.501  
1.385  
1.356

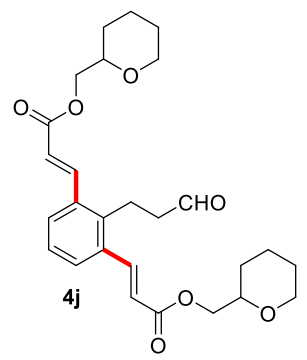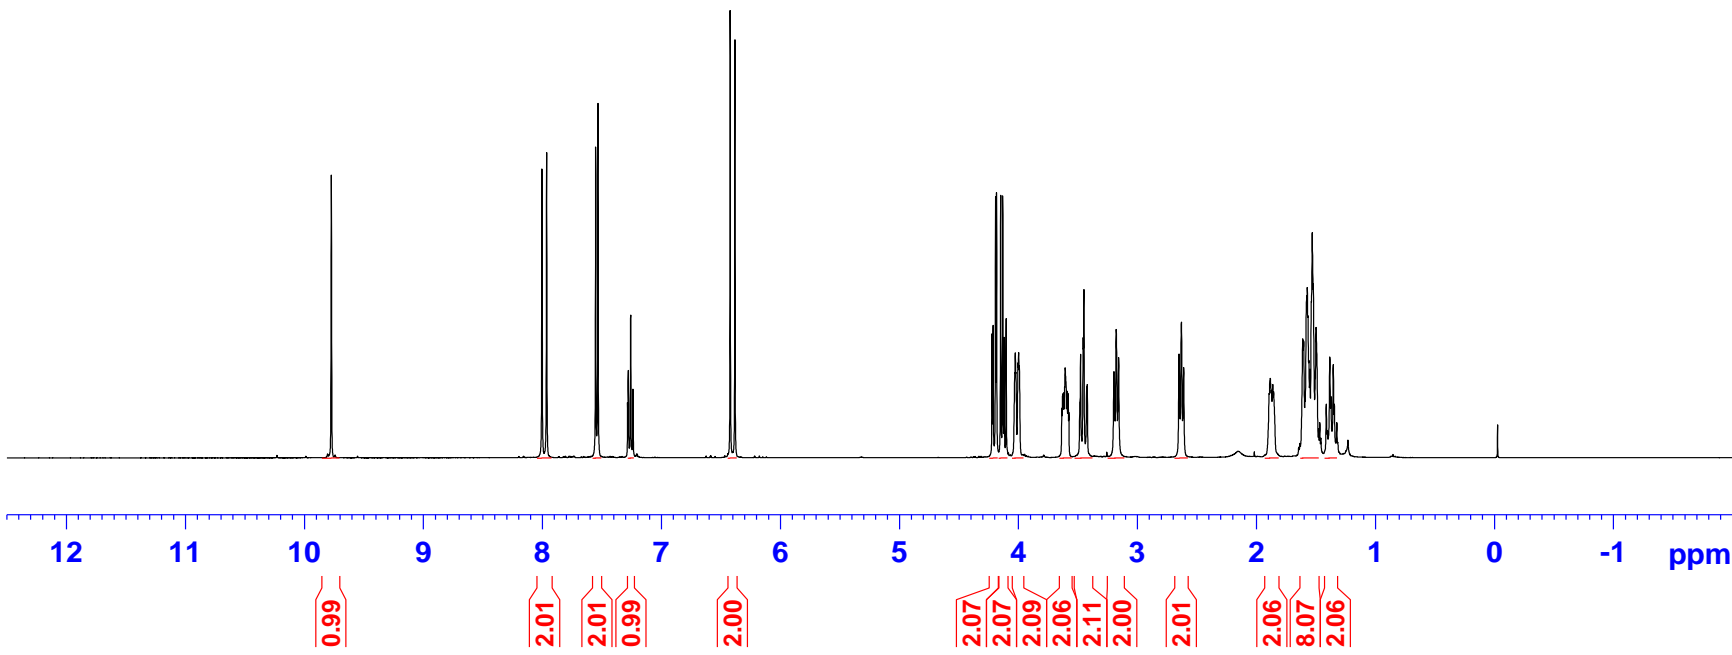

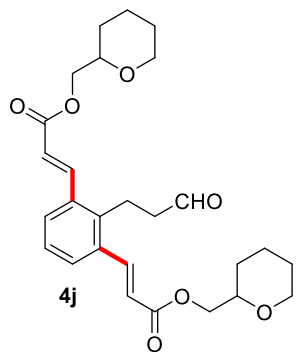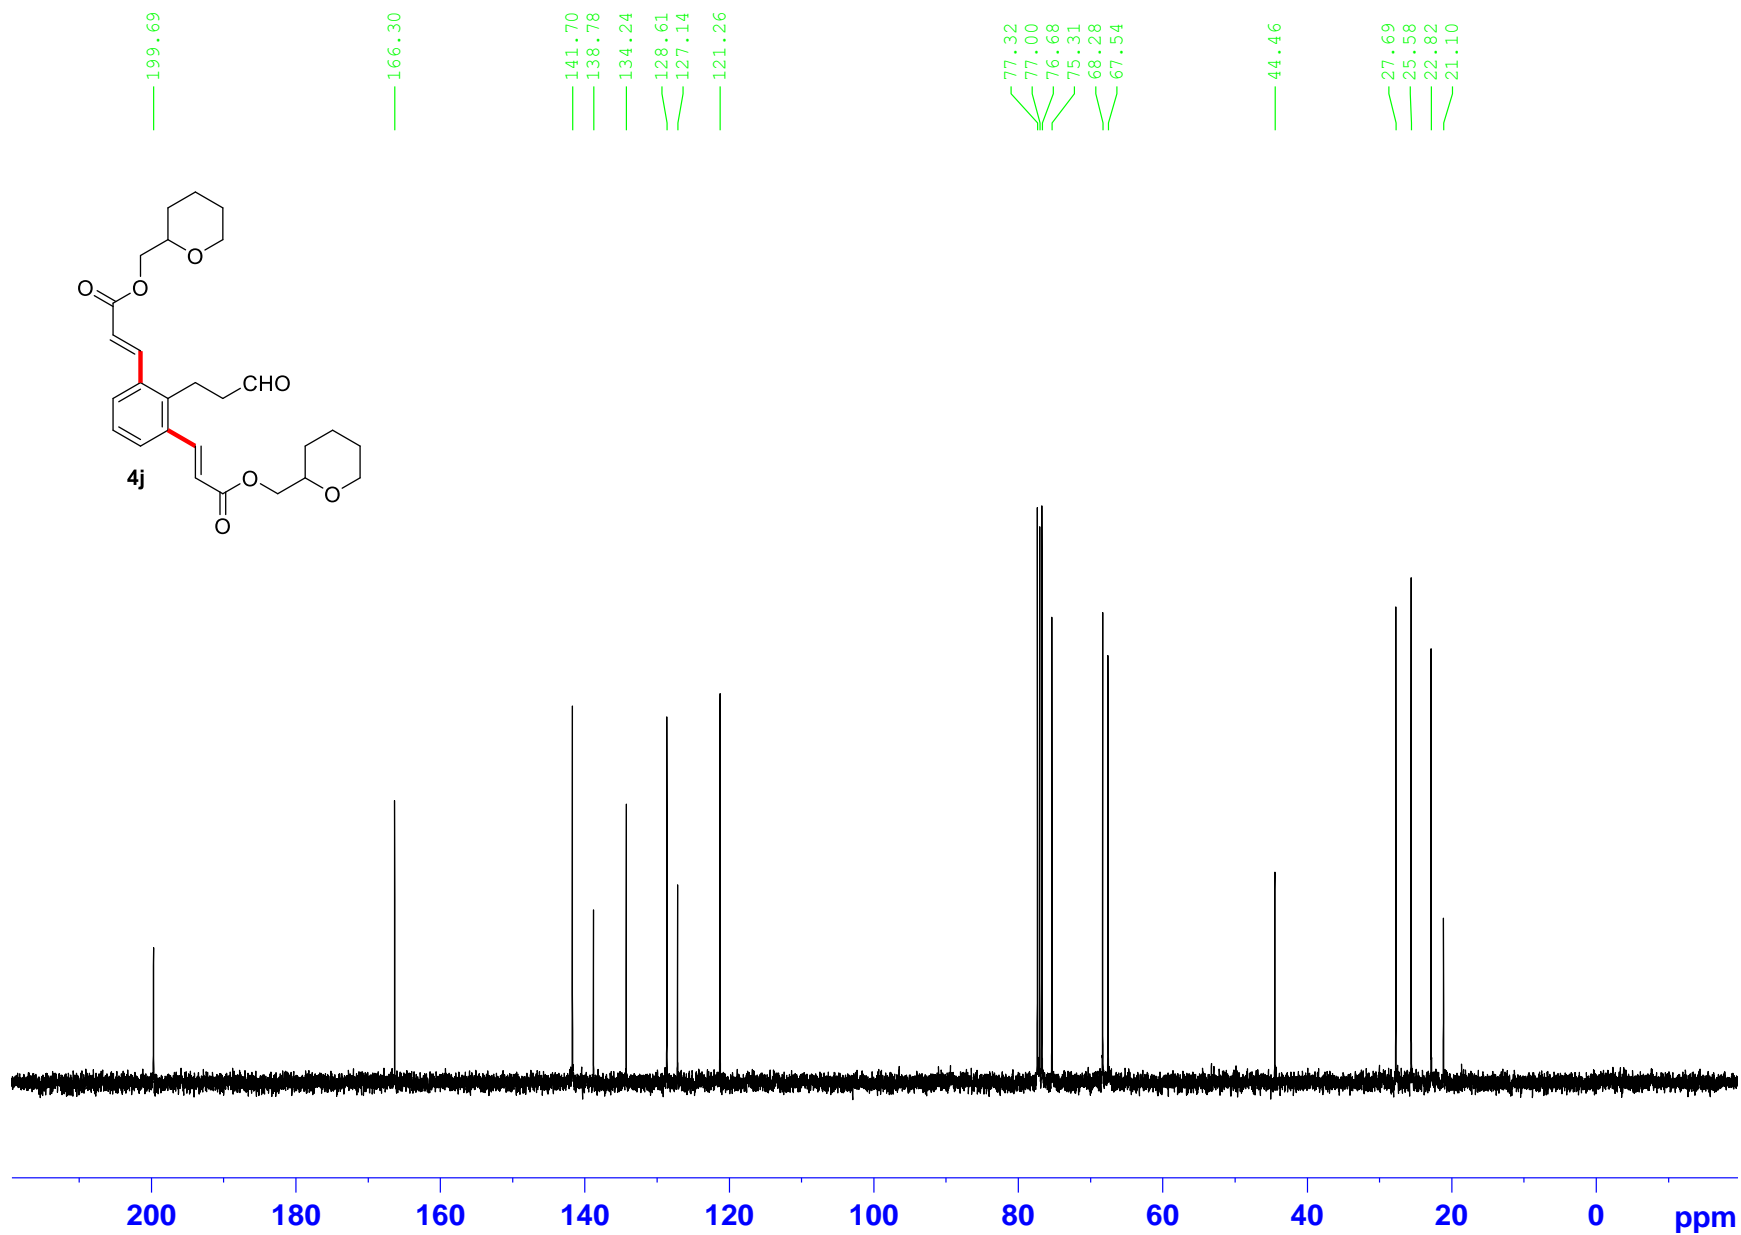



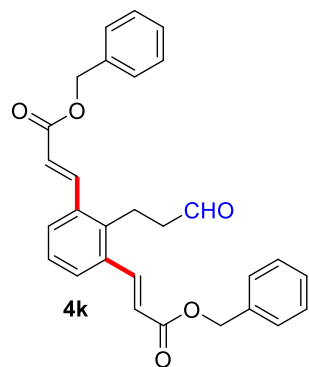

9.805  
8.087  
8.047  
7.593  
7.574  
7.466  
7.461  
7.455  
7.441  
7.423  
7.418  
7.408  
7.404  
7.397  
7.392  
7.386  
7.384  
7.375  
7.321  
7.302  
7.286  
7.282  
6.450  
6.411  
5.292

3.247  
3.228  
3.208  
2.698  
2.677  
2.658

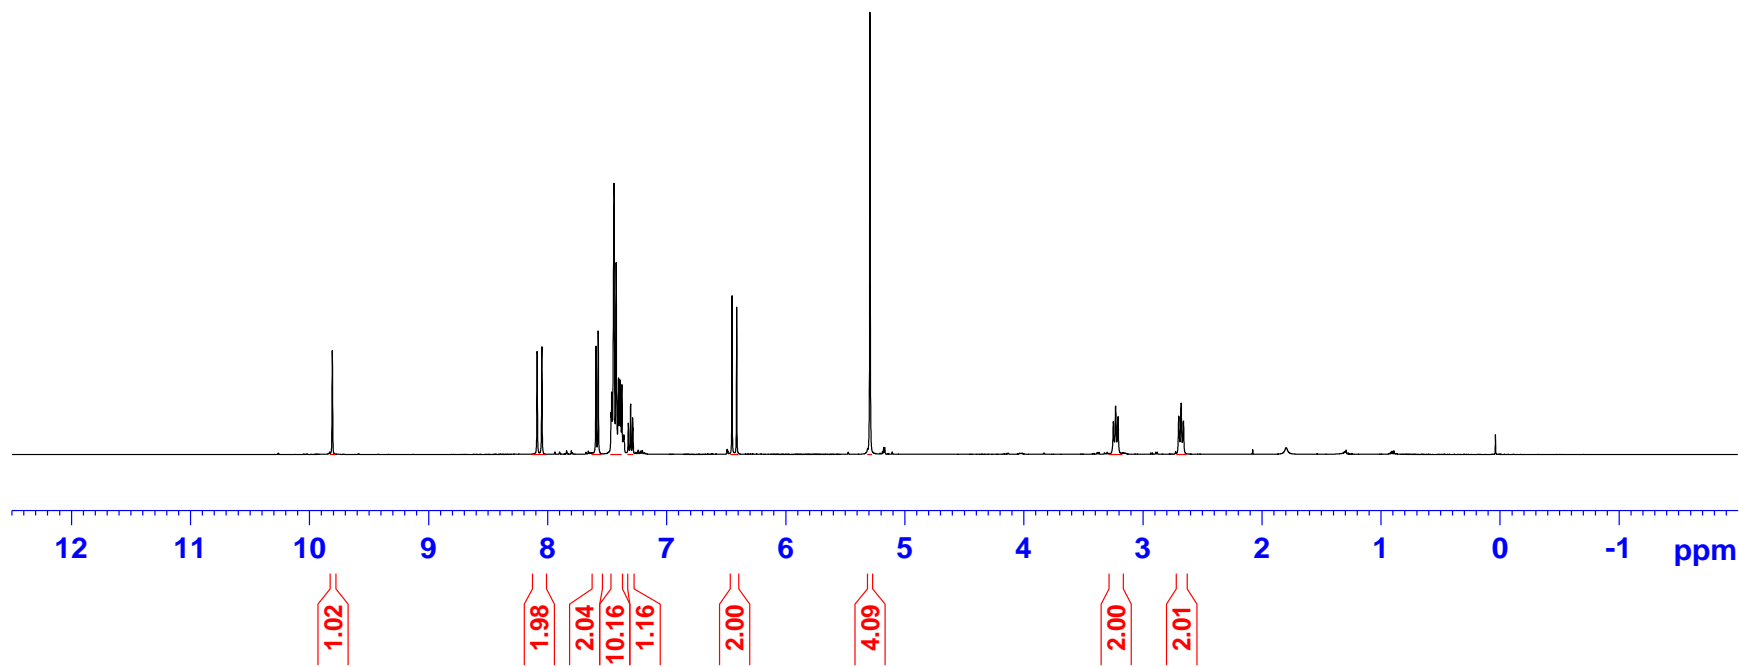

S337

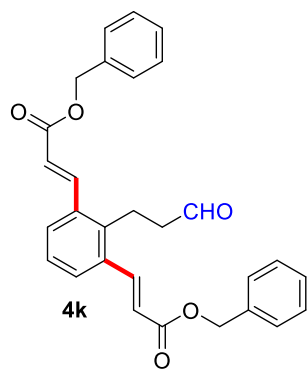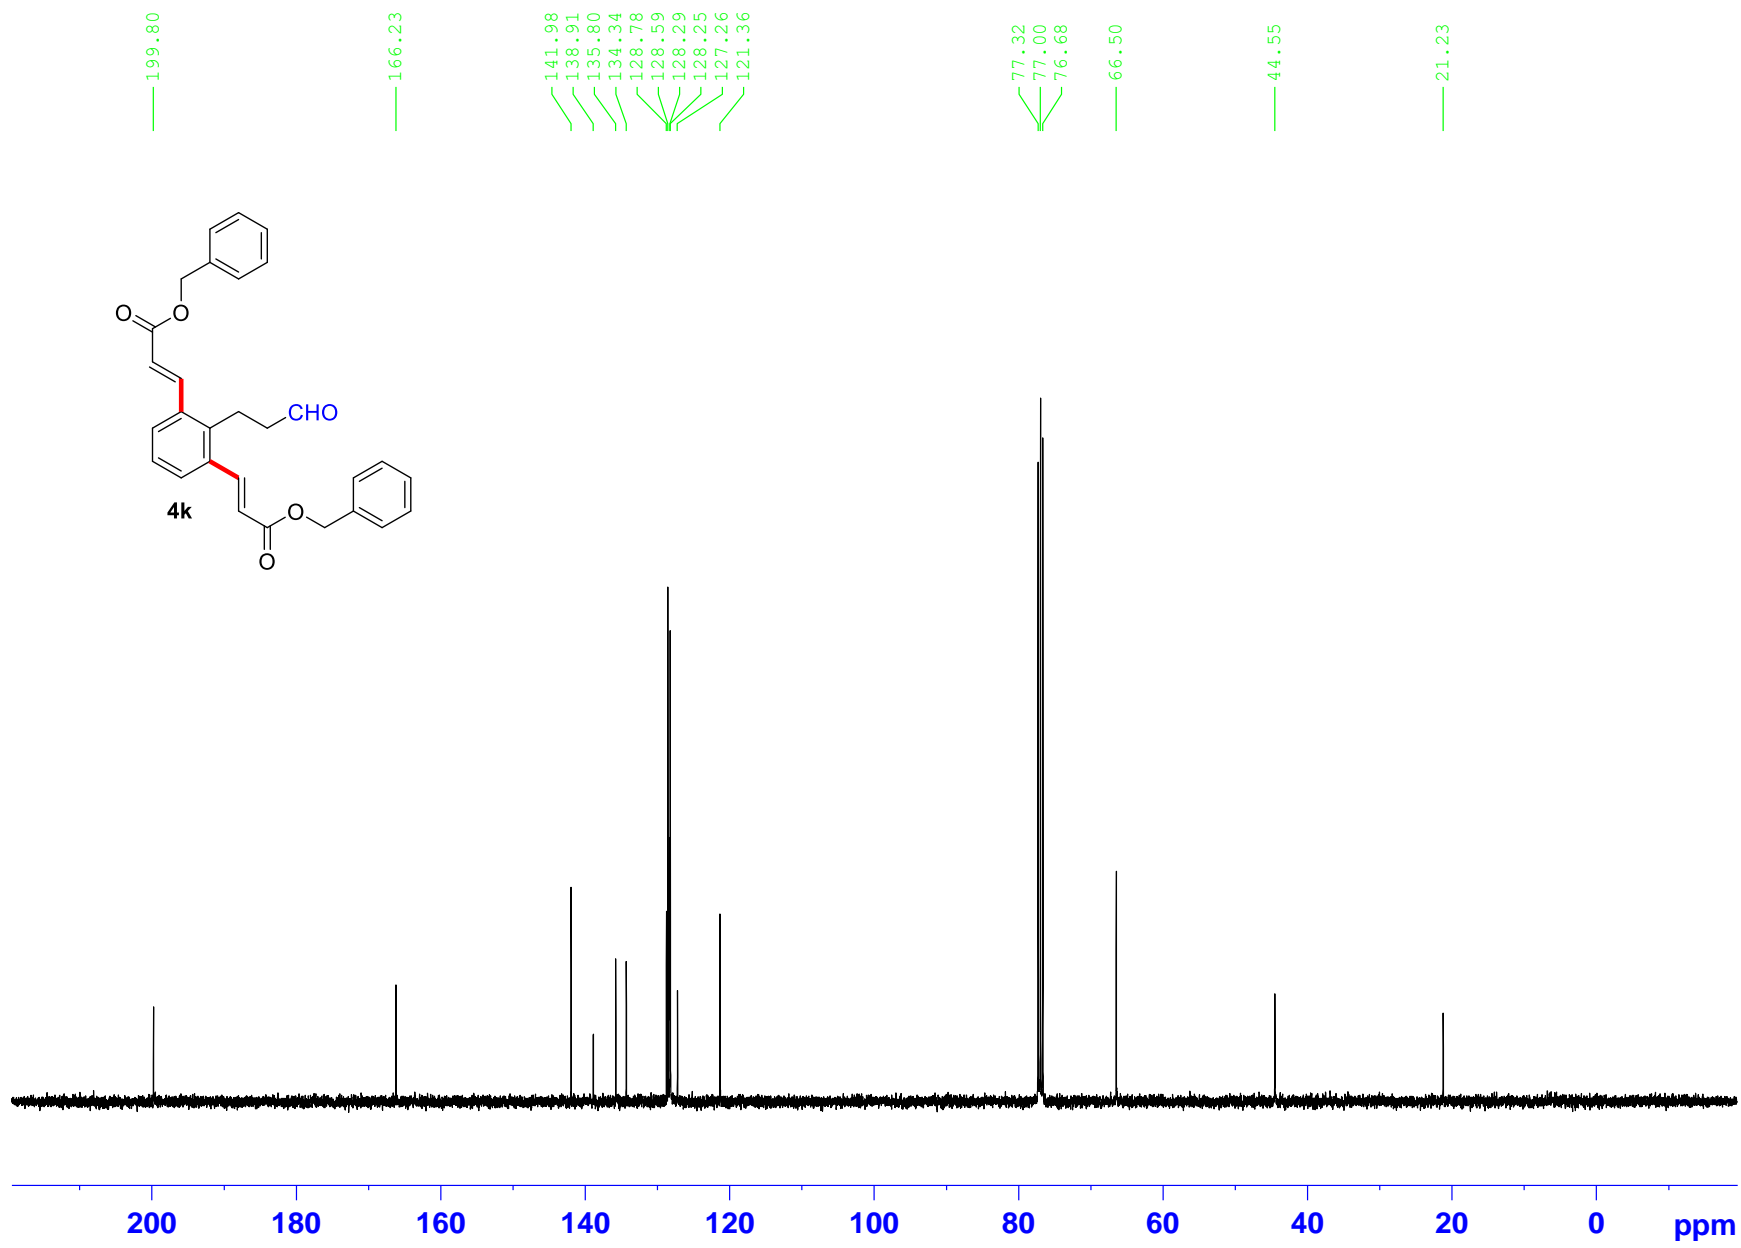

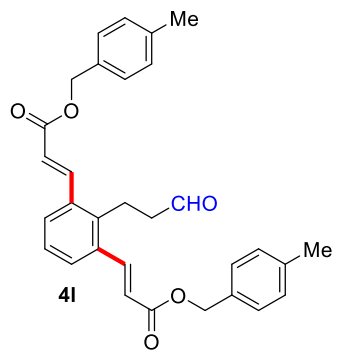

9.769

8.030  
7.991  
7.540  
7.520  
7.316  
7.296  
7.274  
7.254  
7.247  
7.234  
7.201  
7.181  
6.393  
6.353  
5.211

3.202  
3.183  
3.163  
2.652  
2.632  
2.613  
2.357

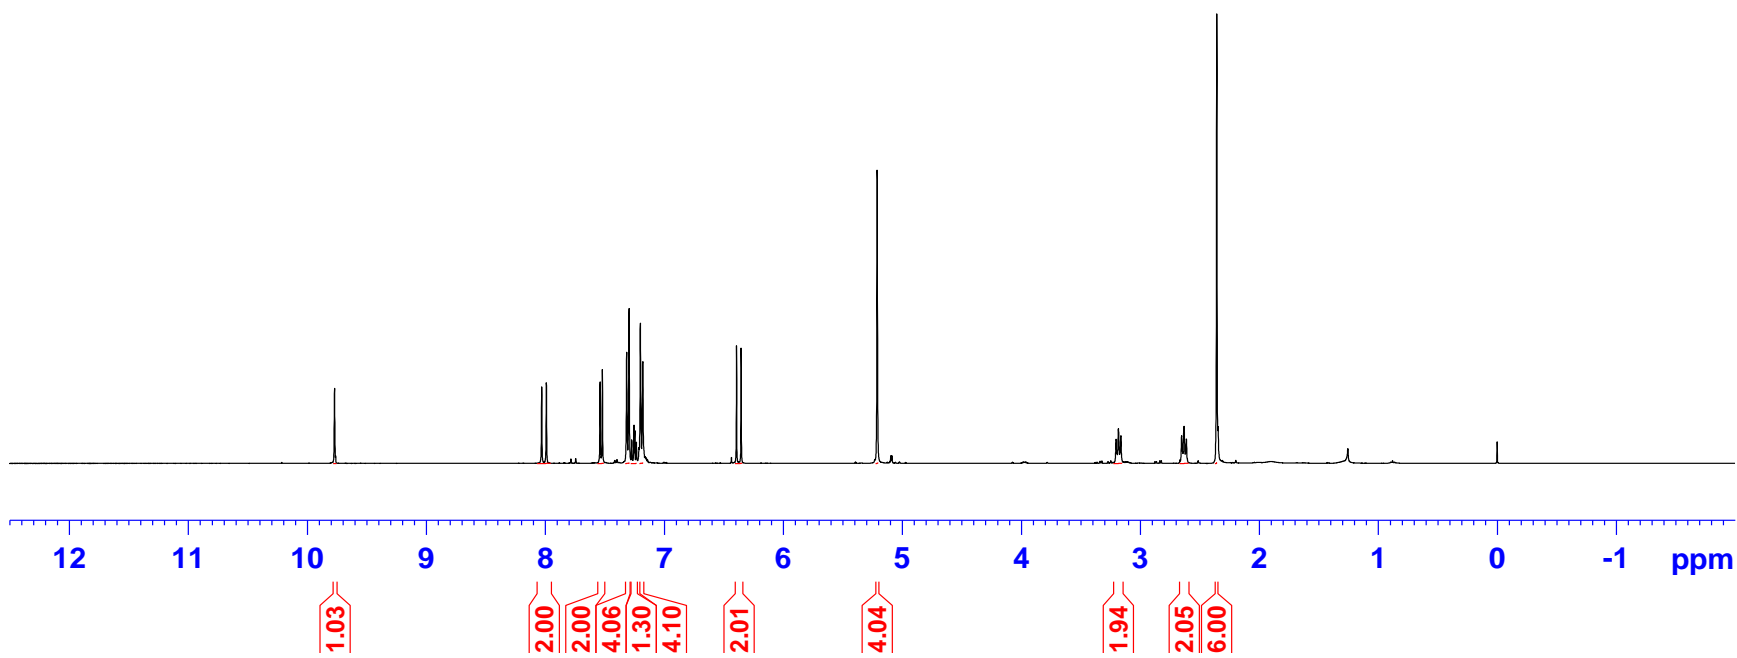

S339

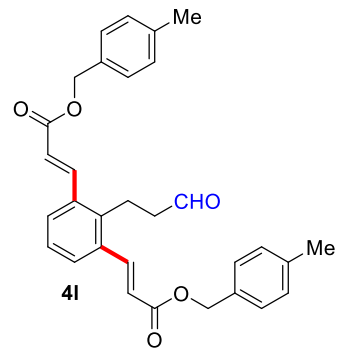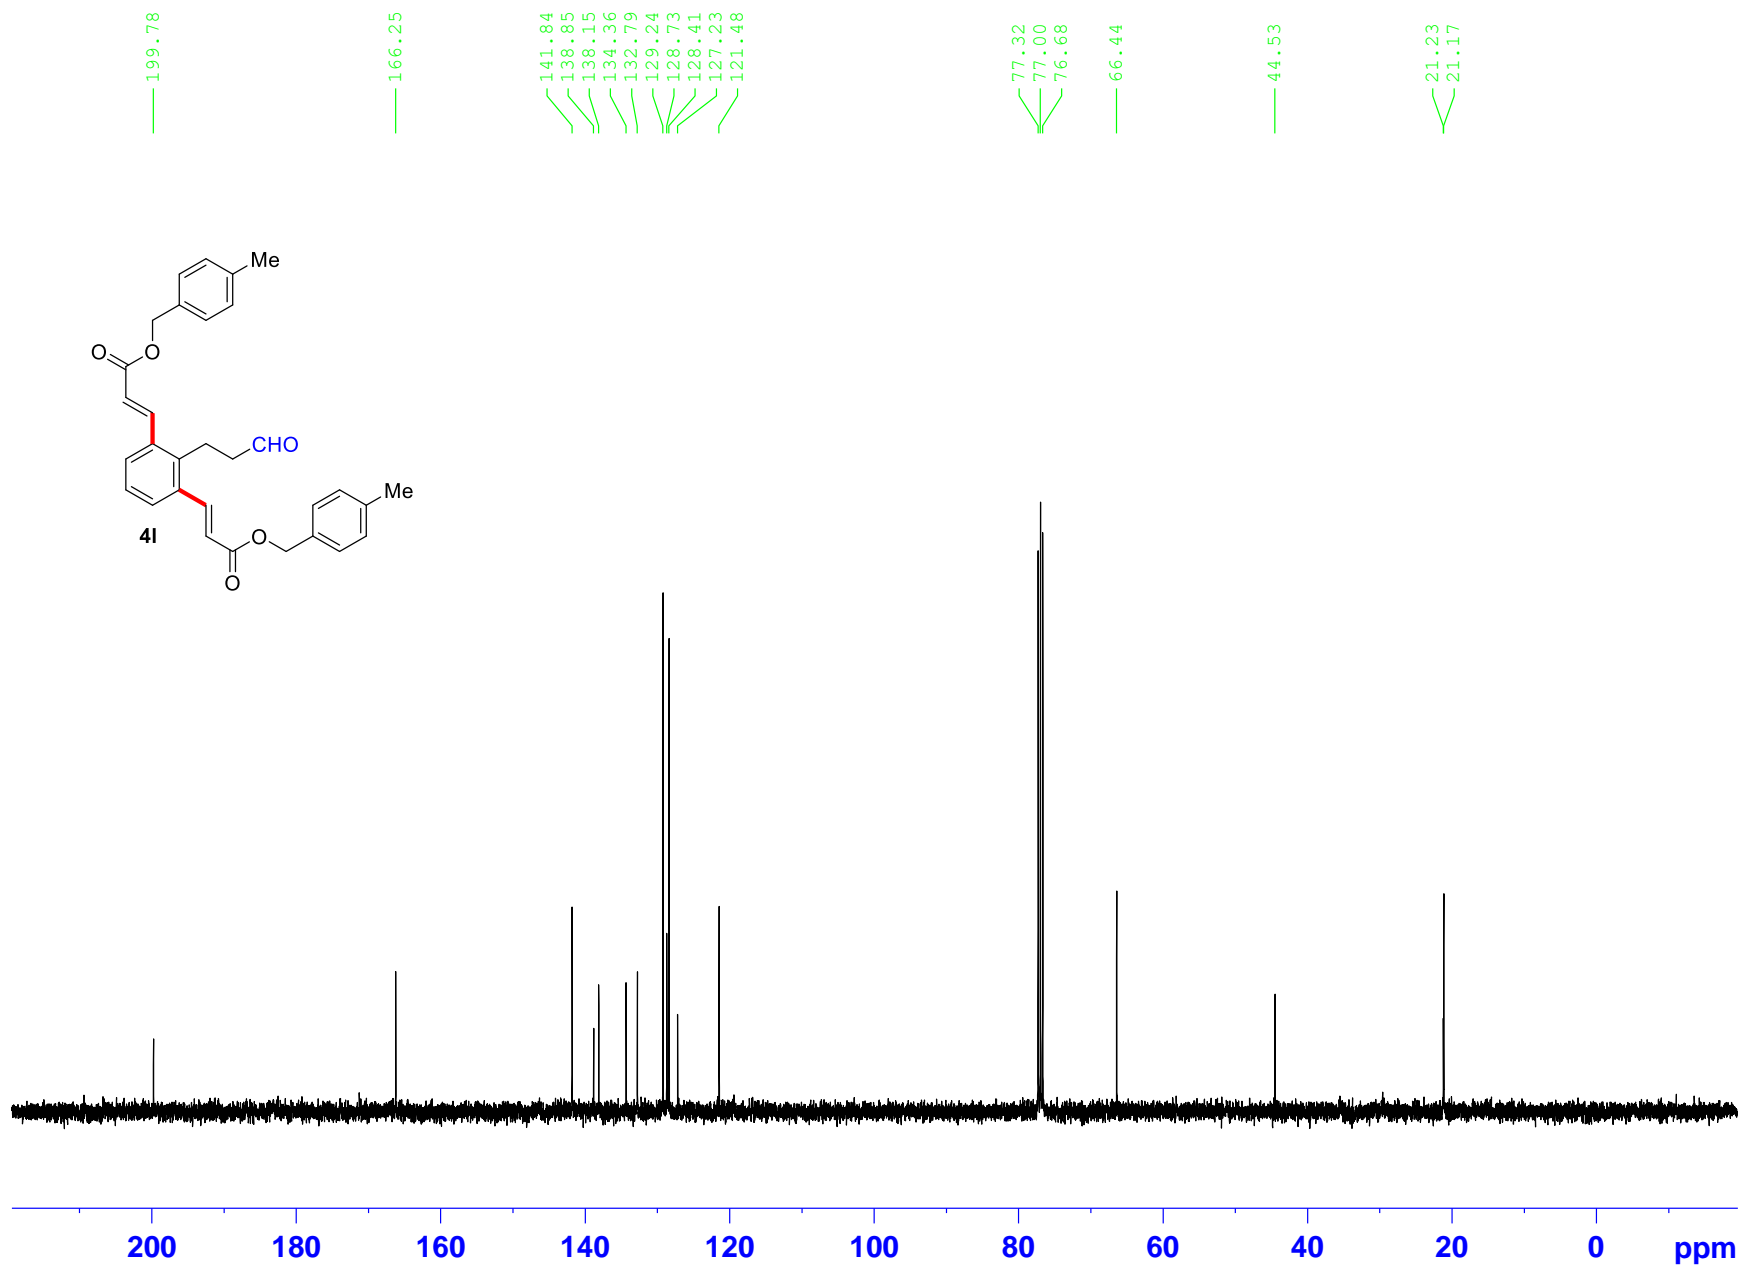

S340

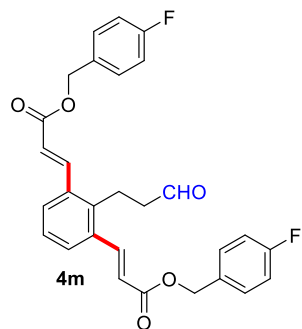

9.779

8.044  
8.005  
7.561  
7.542  
7.397  
7.383  
7.290  
7.271  
7.090  
7.069  
7.049  
6.399  
6.360  
5.217

3.210  
3.193  
3.175  
2.667  
2.649  
2.631

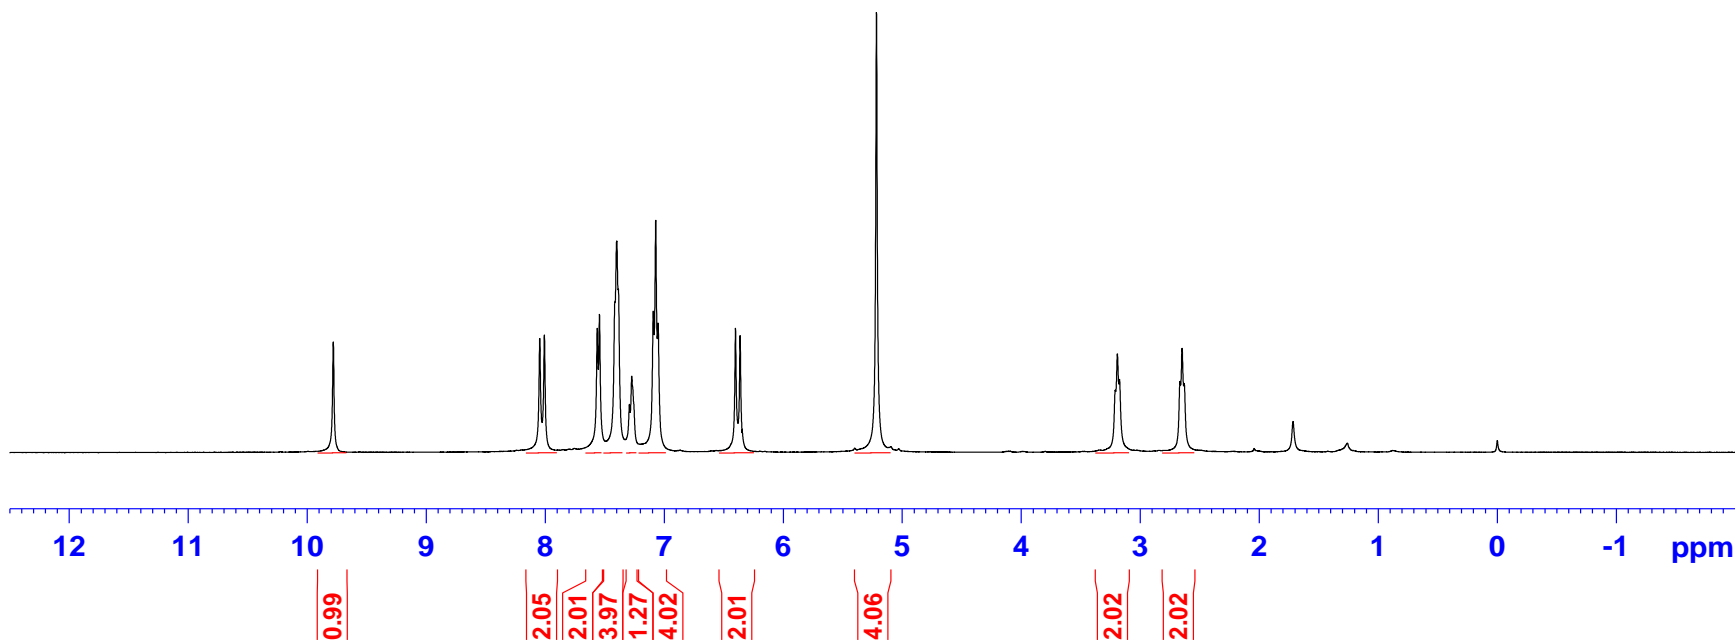

S341

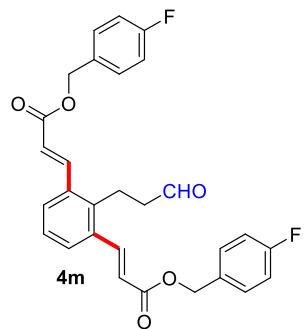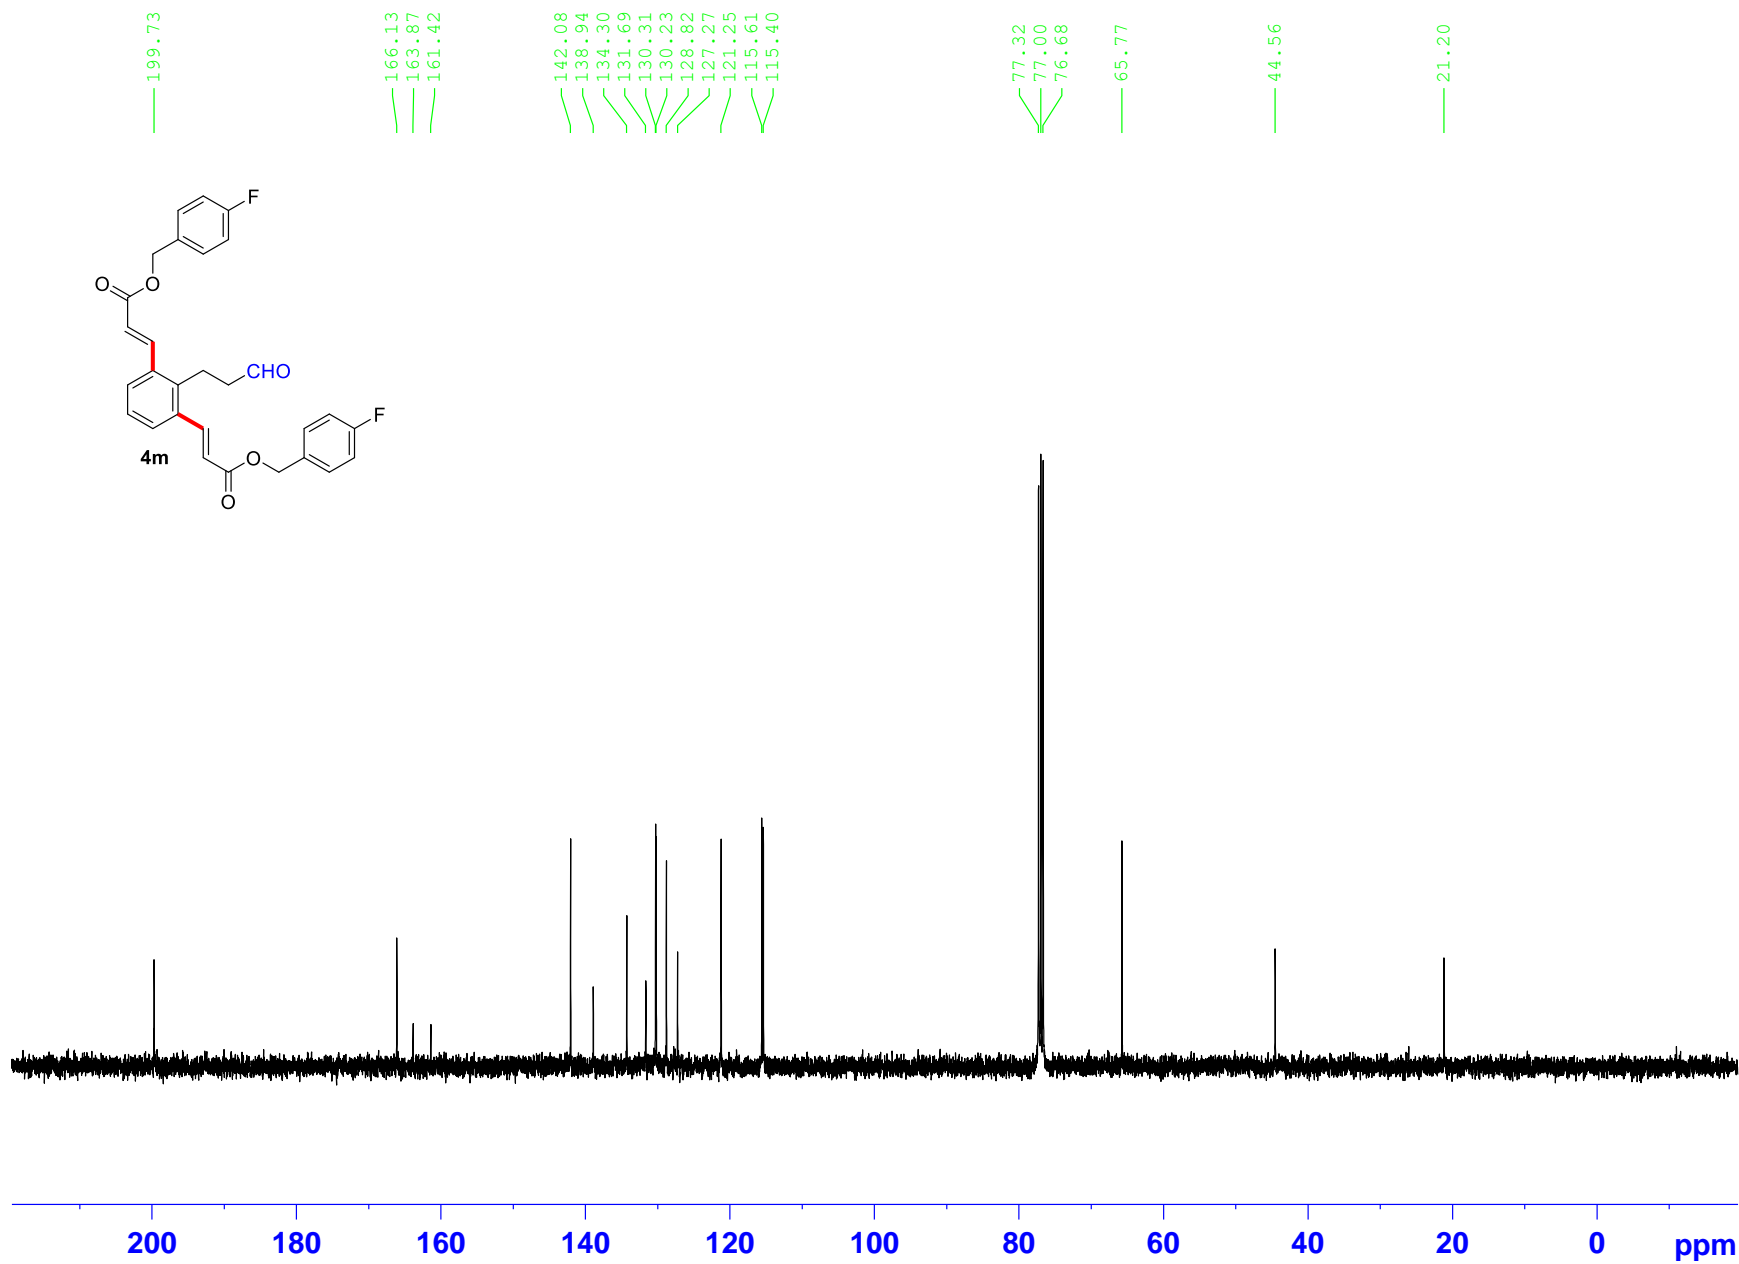

S342

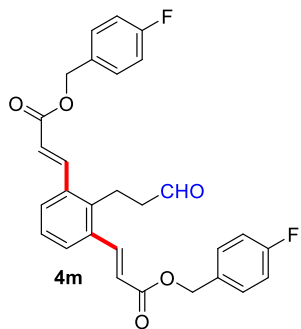

— -113.433

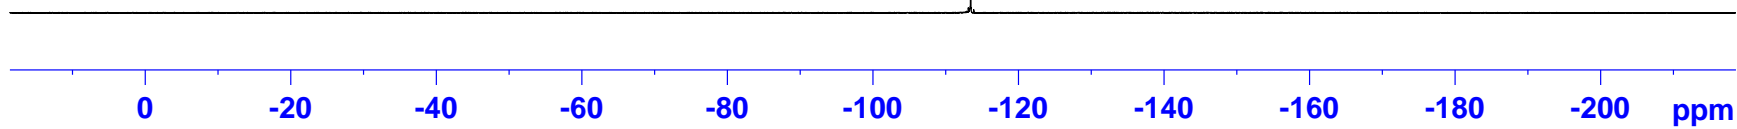

S343

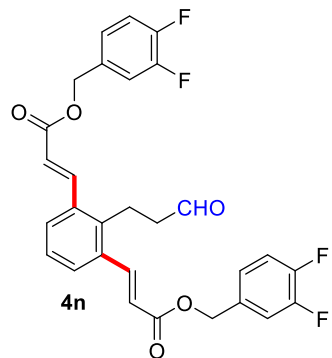

9.810  
8.086  
8.047  
7.604  
7.585  
7.332  
7.312  
7.291  
7.286  
7.276  
7.271  
7.263  
7.247  
7.227  
7.205  
7.188  
7.181  
7.176  
7.167  
7.164  
6.431  
6.392  
5.219

3.244  
3.225  
3.205  
2.707  
2.687  
2.668

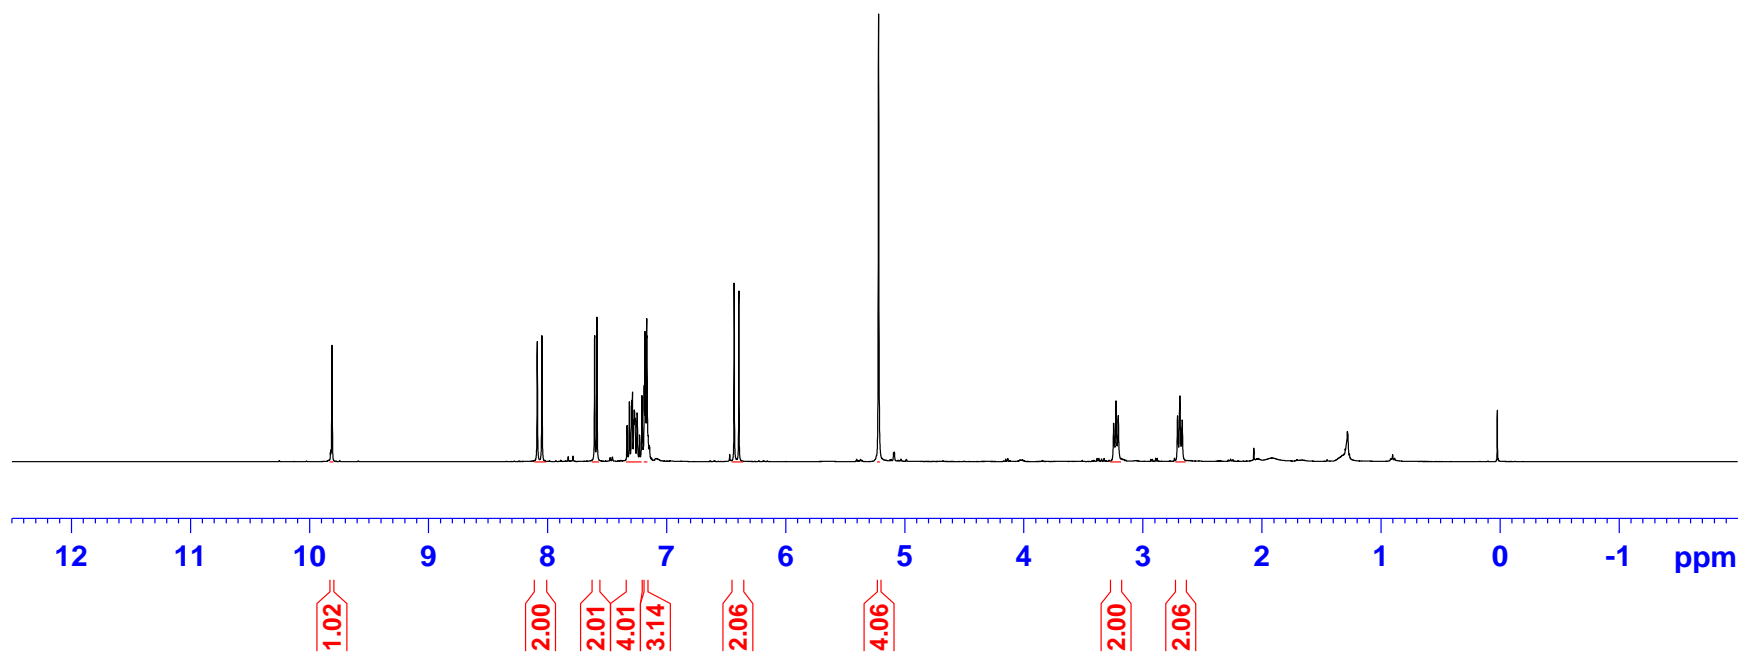

S344



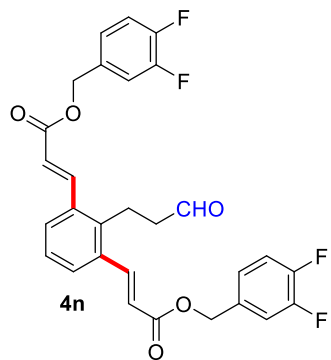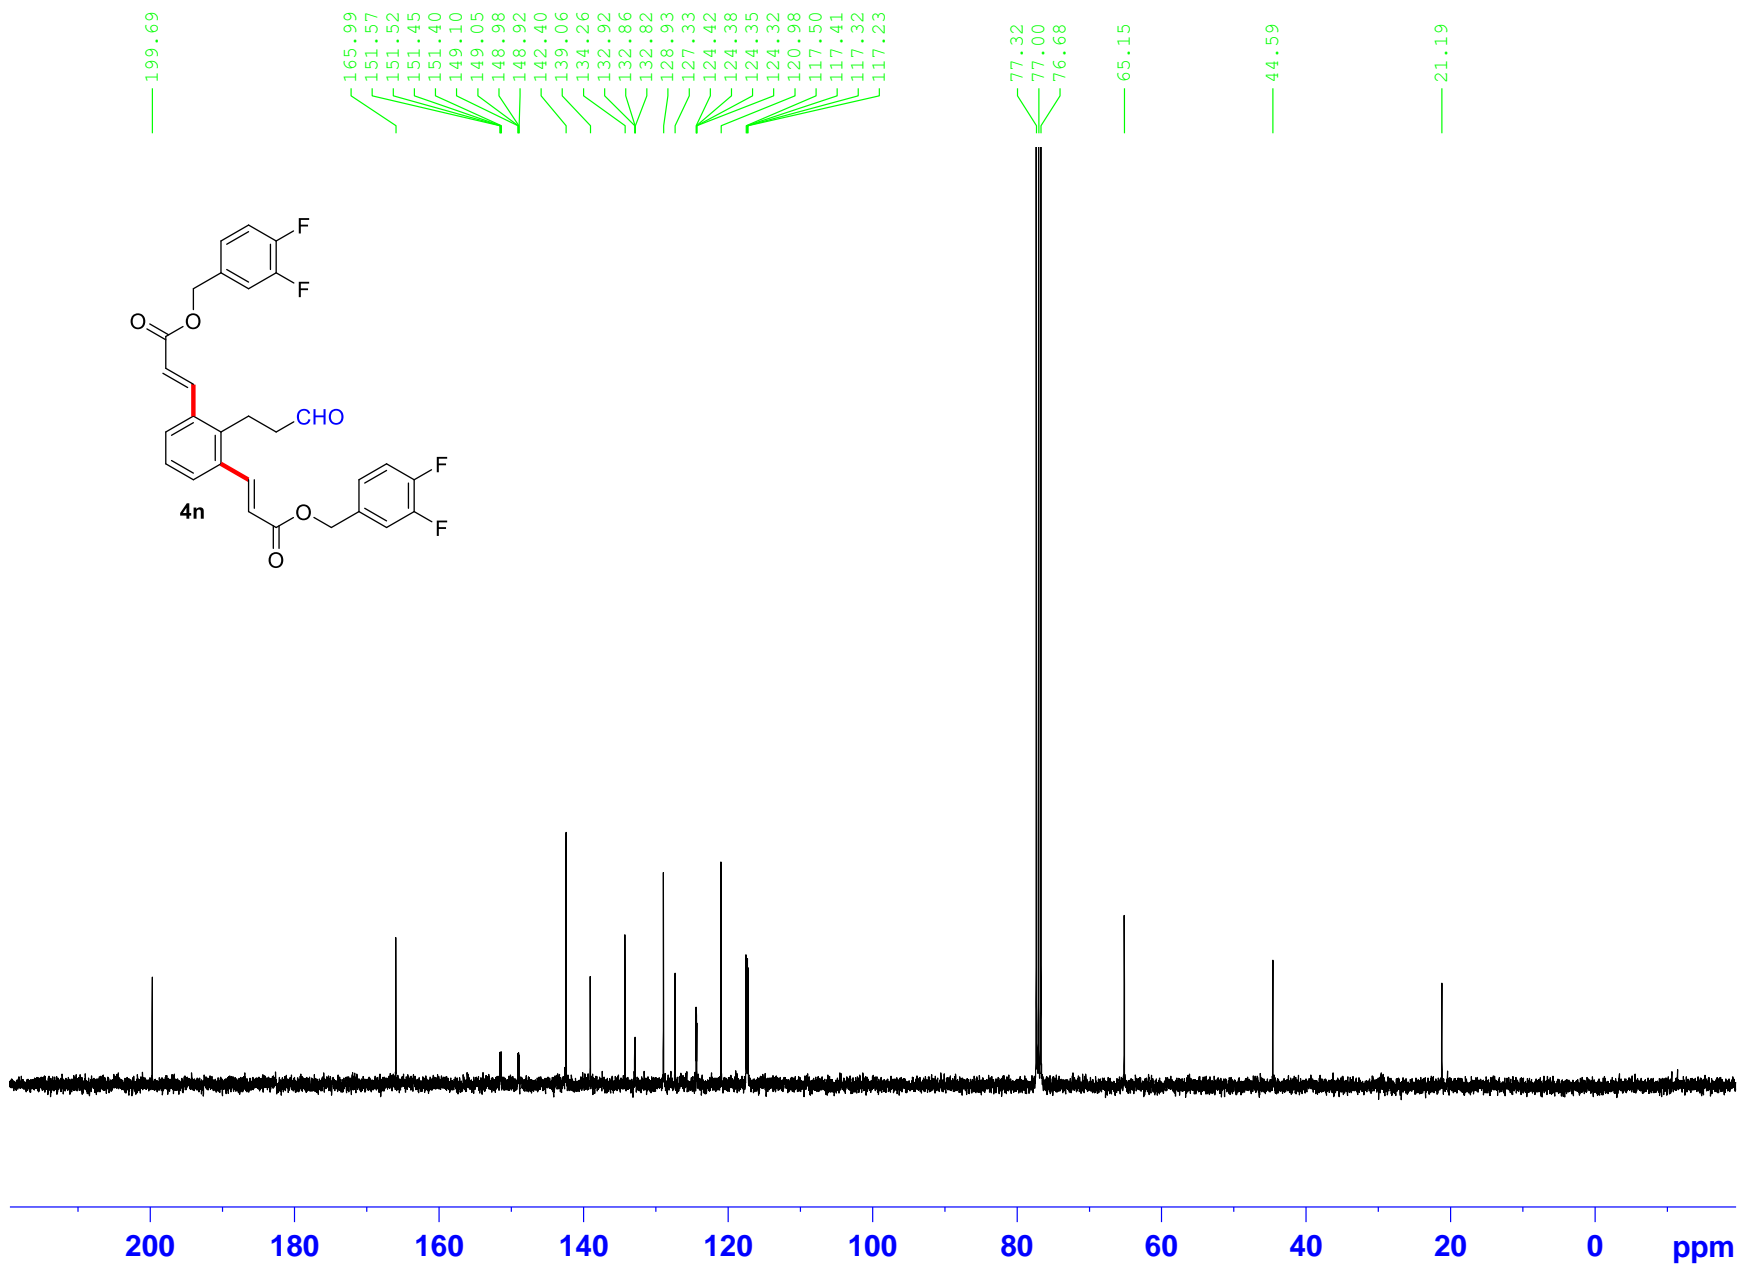

S345

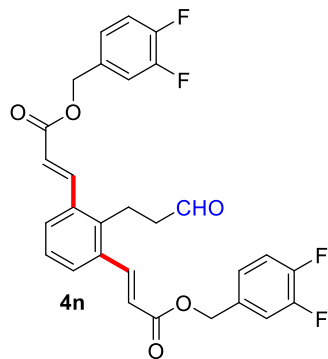

-137.105  
-137.160  
-138.076  
-138.130

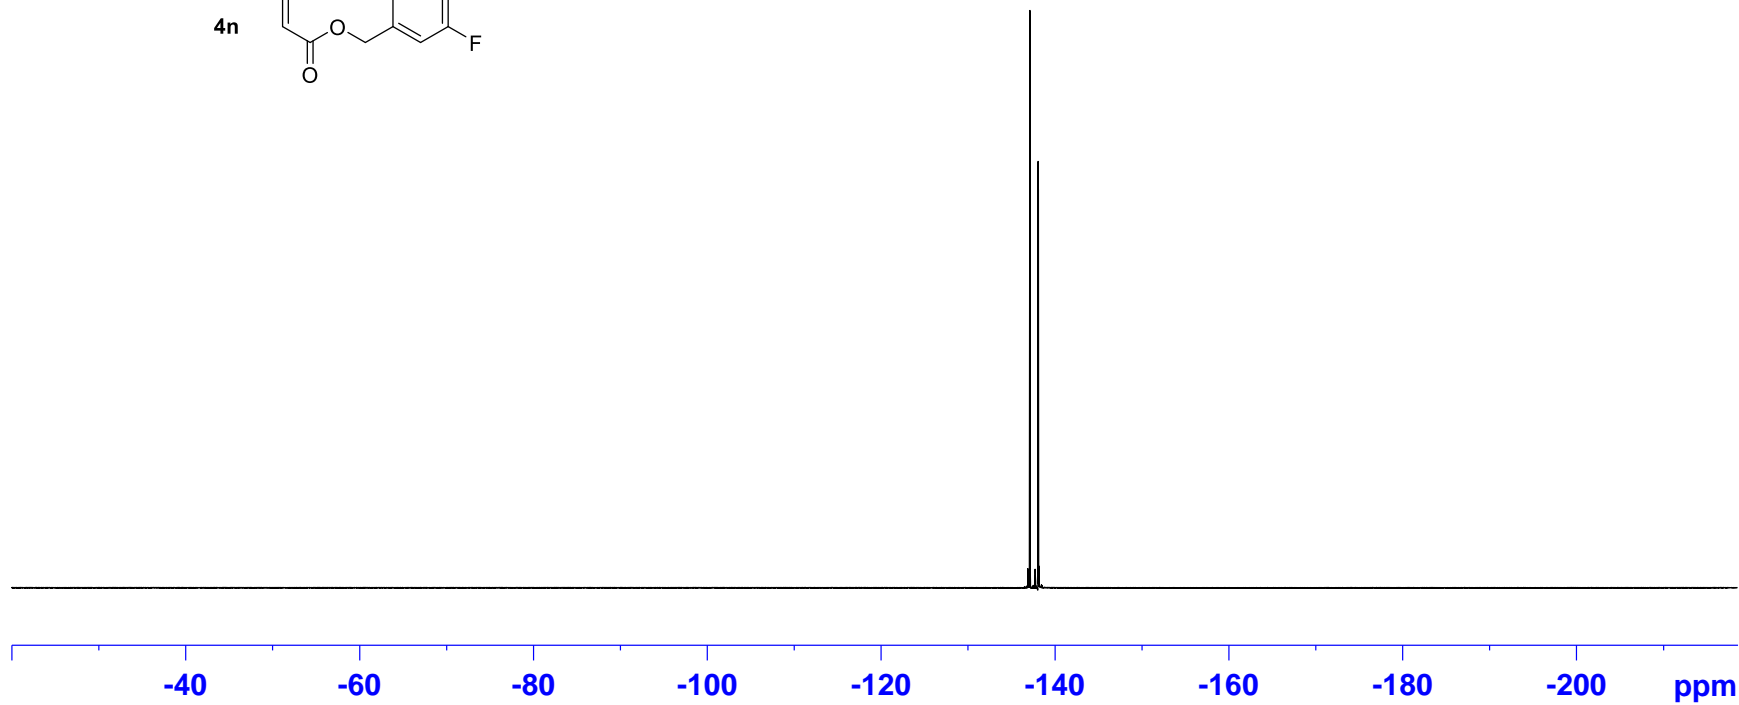

S346

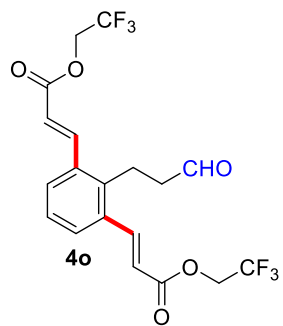

9.799

8.136  
8.097  
7.637  
7.618  
7.353  
7.334  
7.314  
7.268  
6.450  
6.411

4.643  
4.622  
4.601  
4.580

3.239  
3.220  
3.200  
2.705  
2.685  
2.666

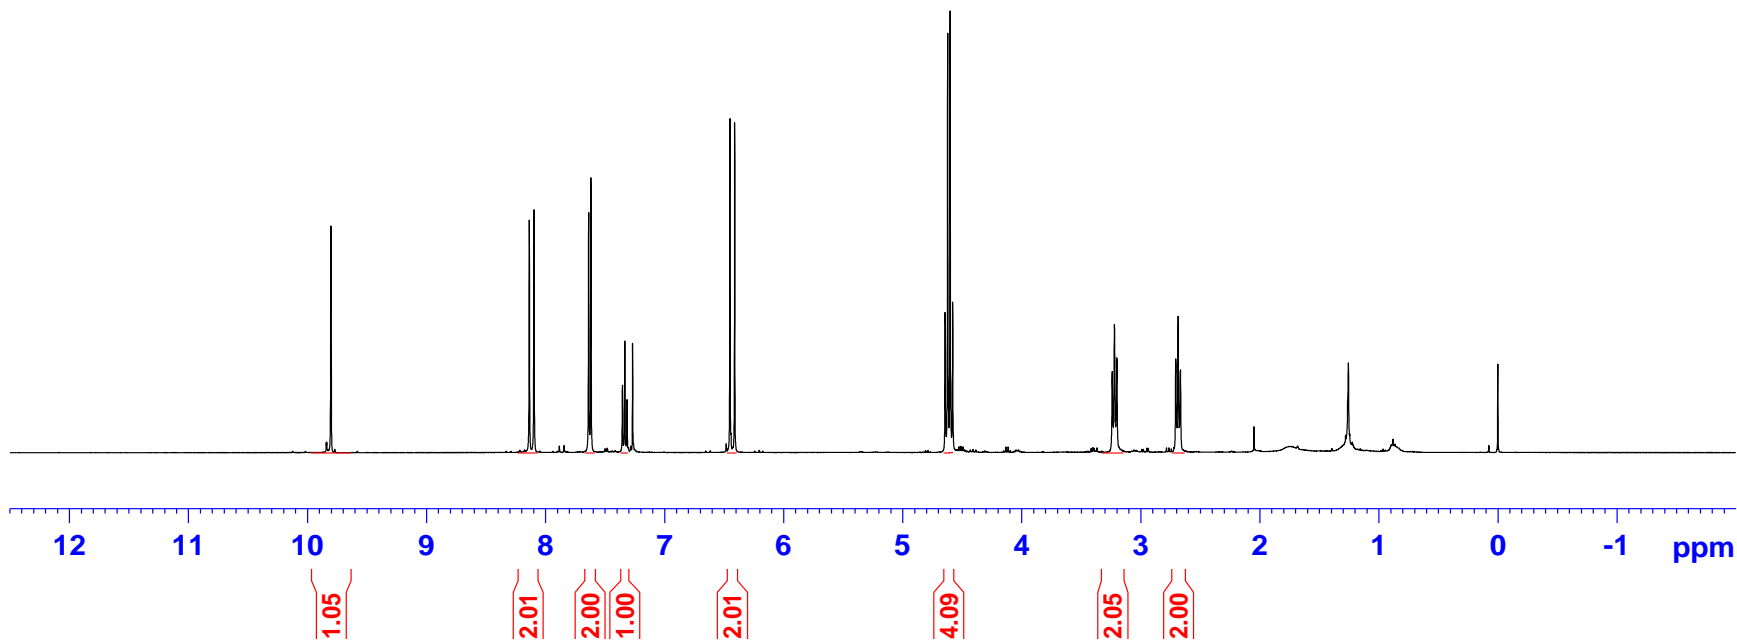

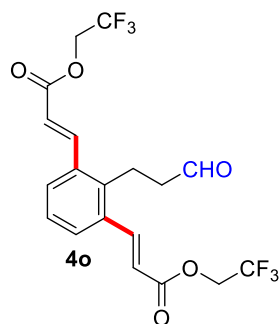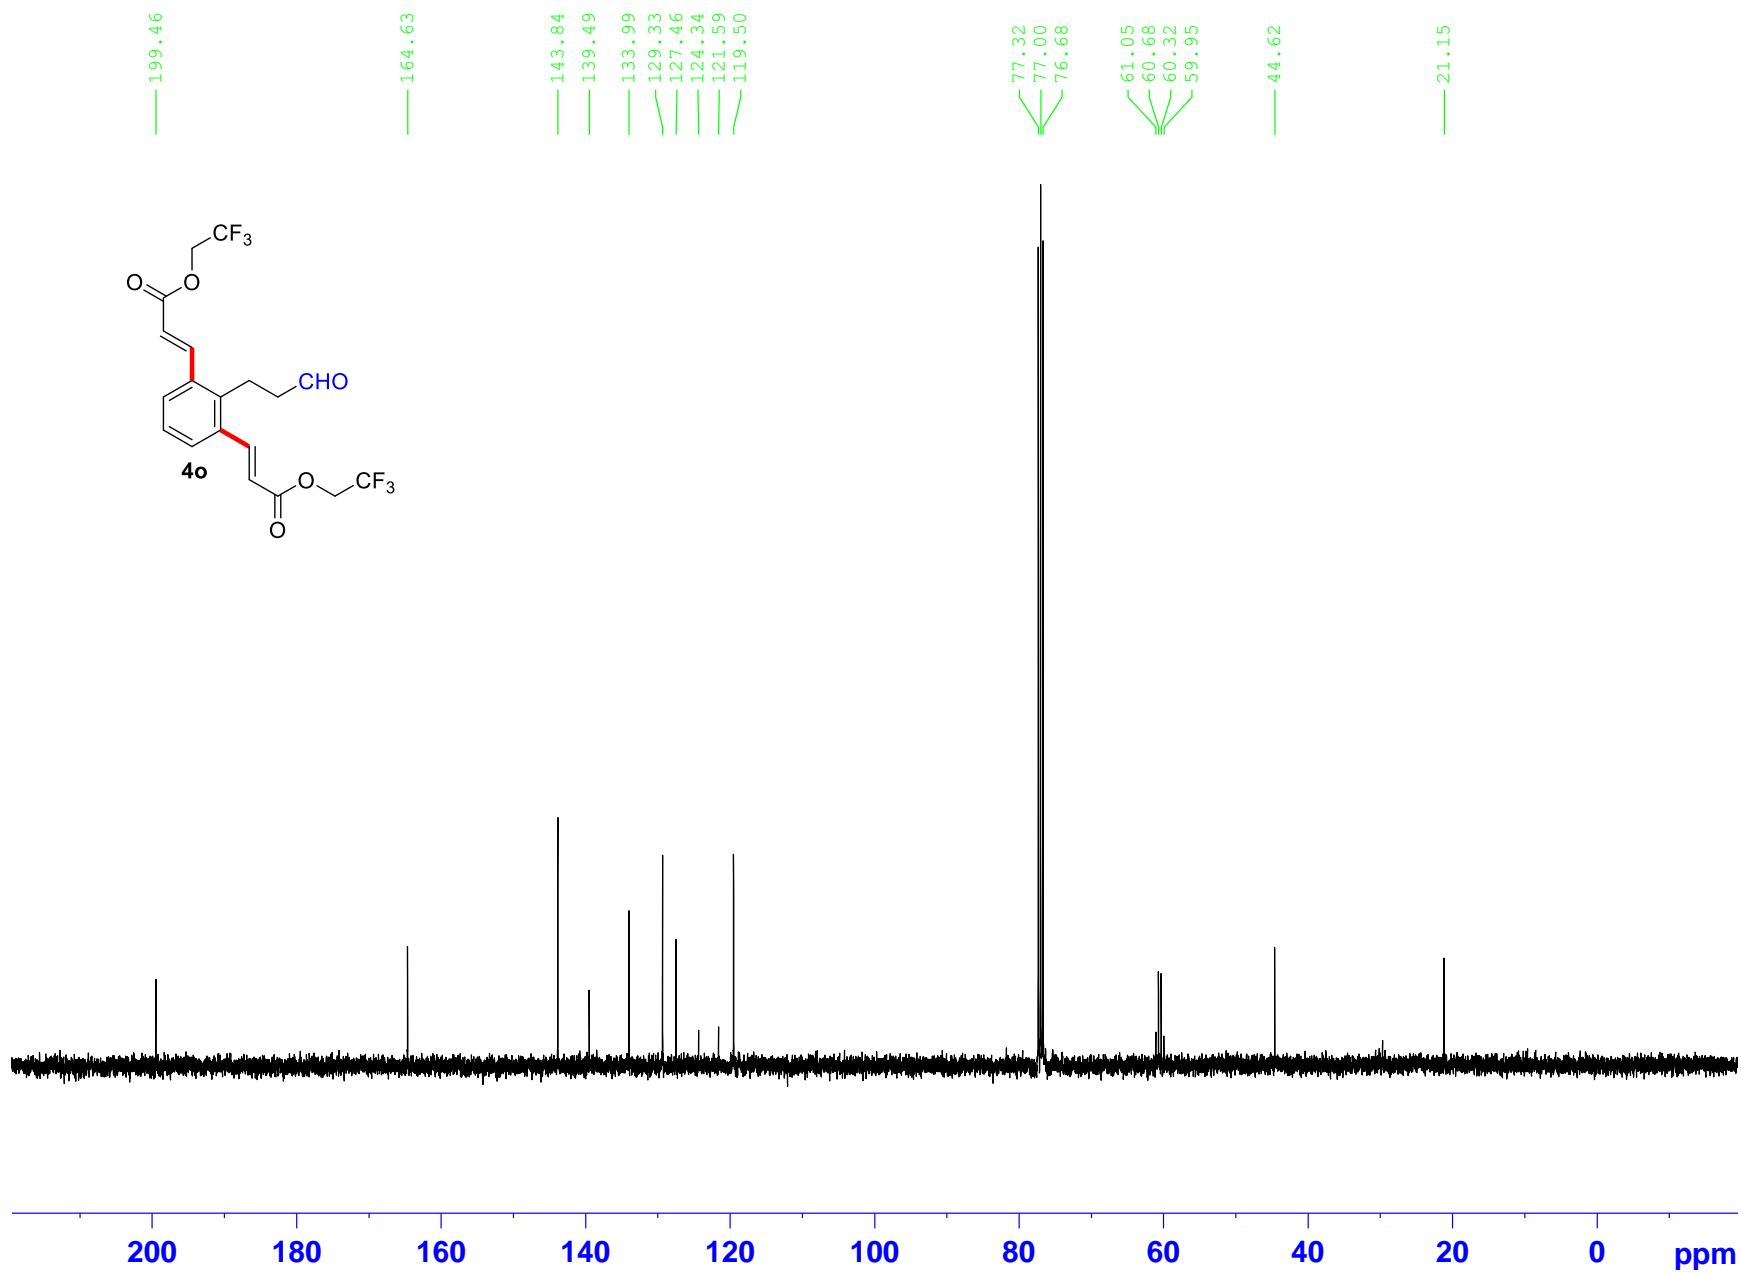

S348

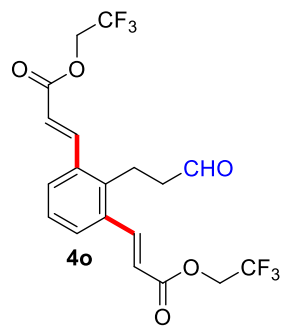

— -73.69

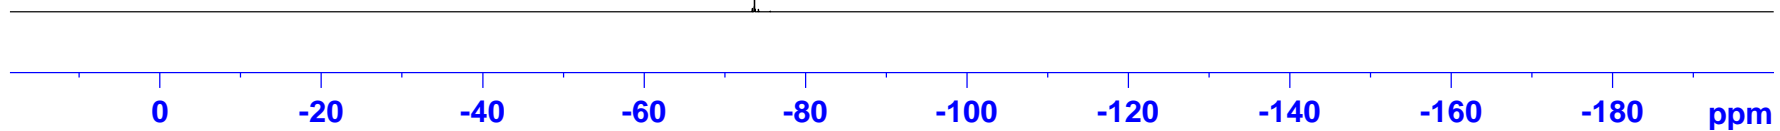

S349

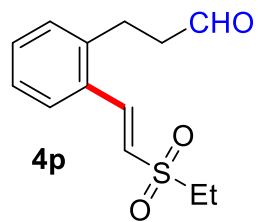

9.801

7.912  
7.874  
7.551  
7.531  
7.408  
7.405  
7.390  
7.371  
7.368  
7.305  
7.286  
7.267  
6.809  
6.771

3.152  
3.134  
3.120  
3.115  
3.102  
3.097  
3.083  
2.795  
2.776  
2.758  
1.426  
1.408  
1.389

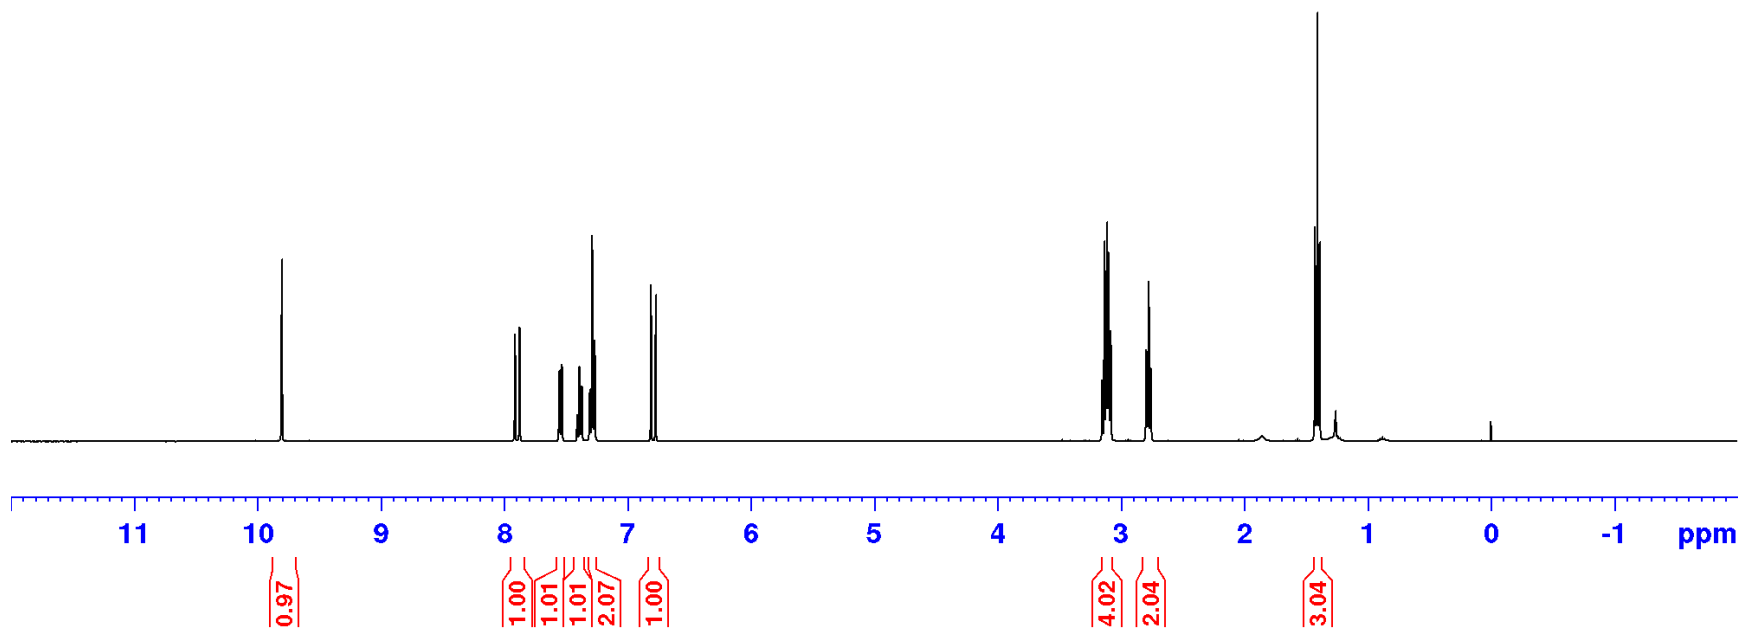

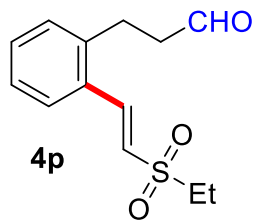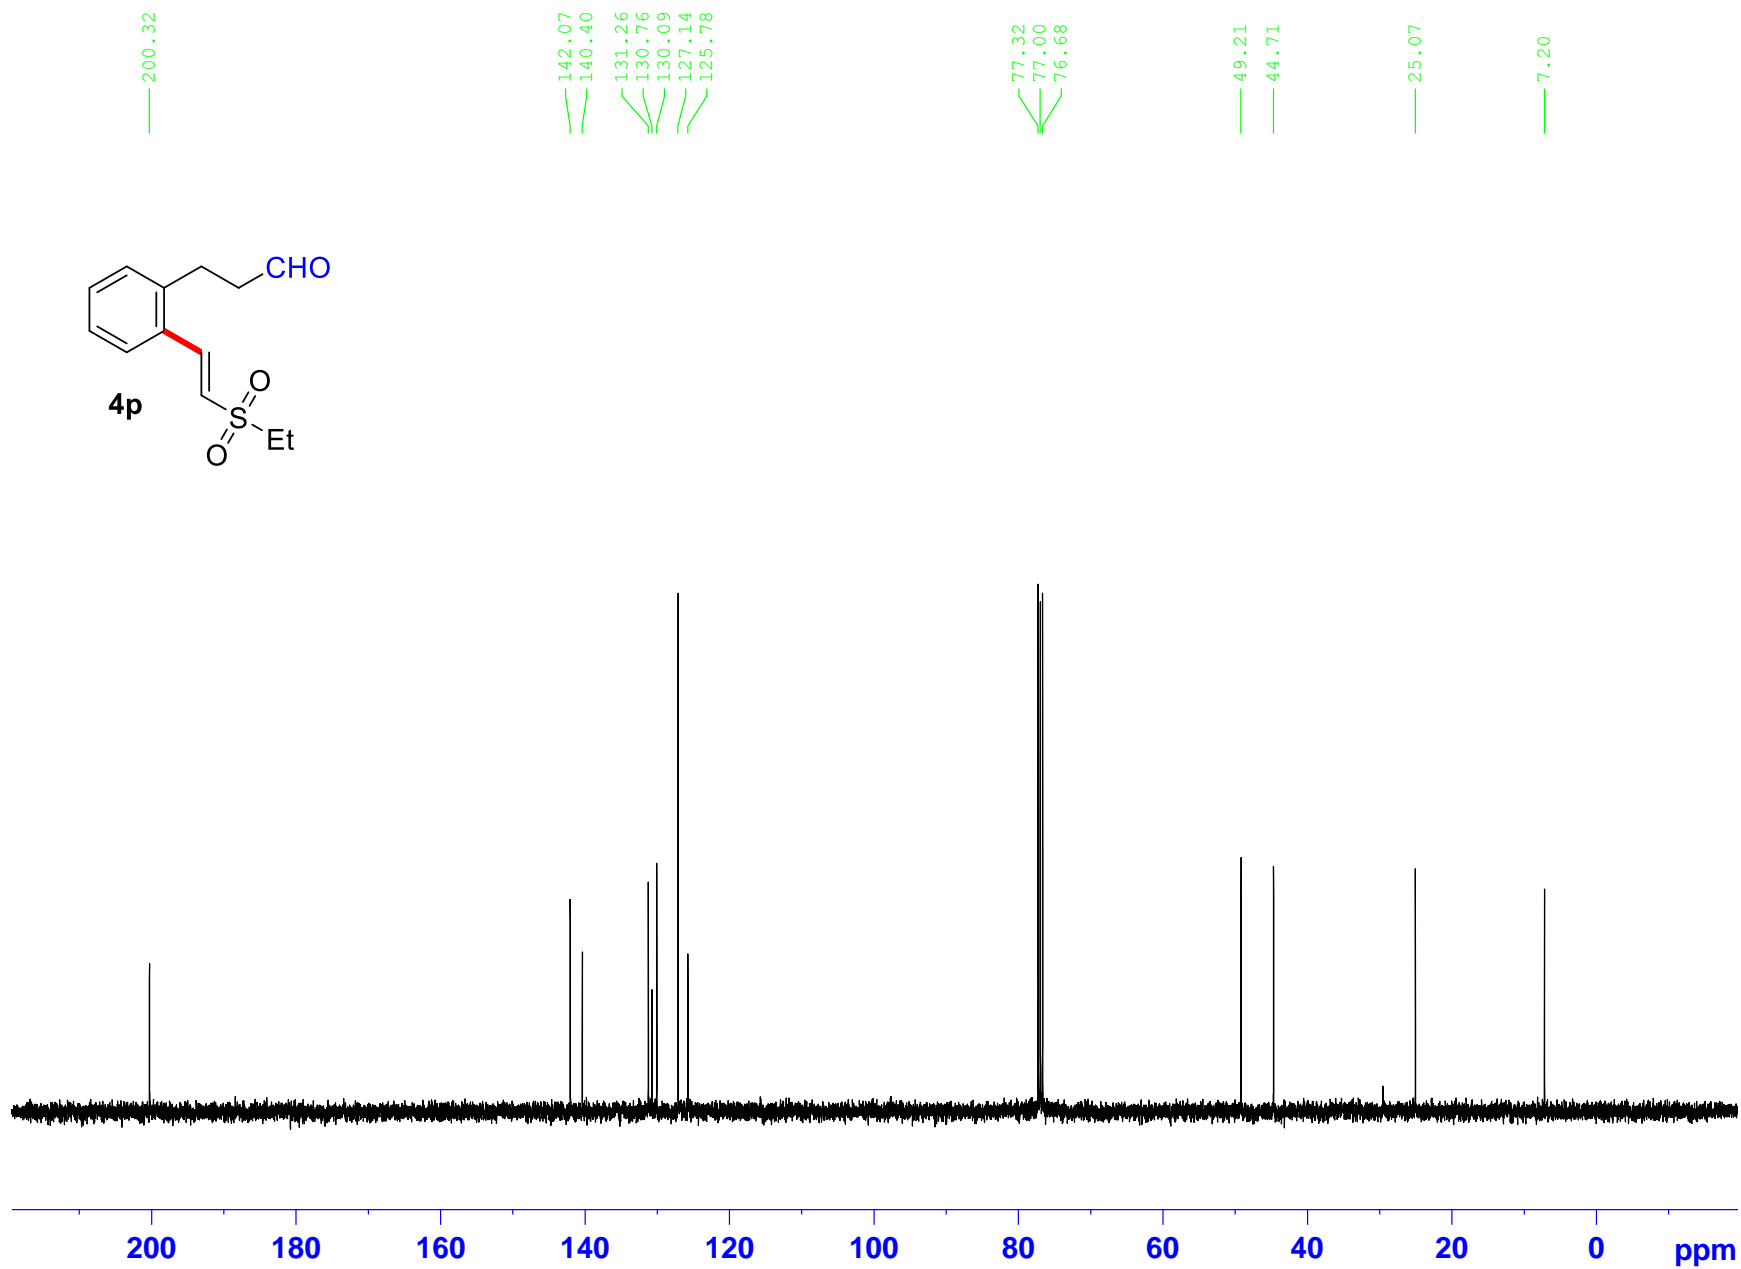

S351

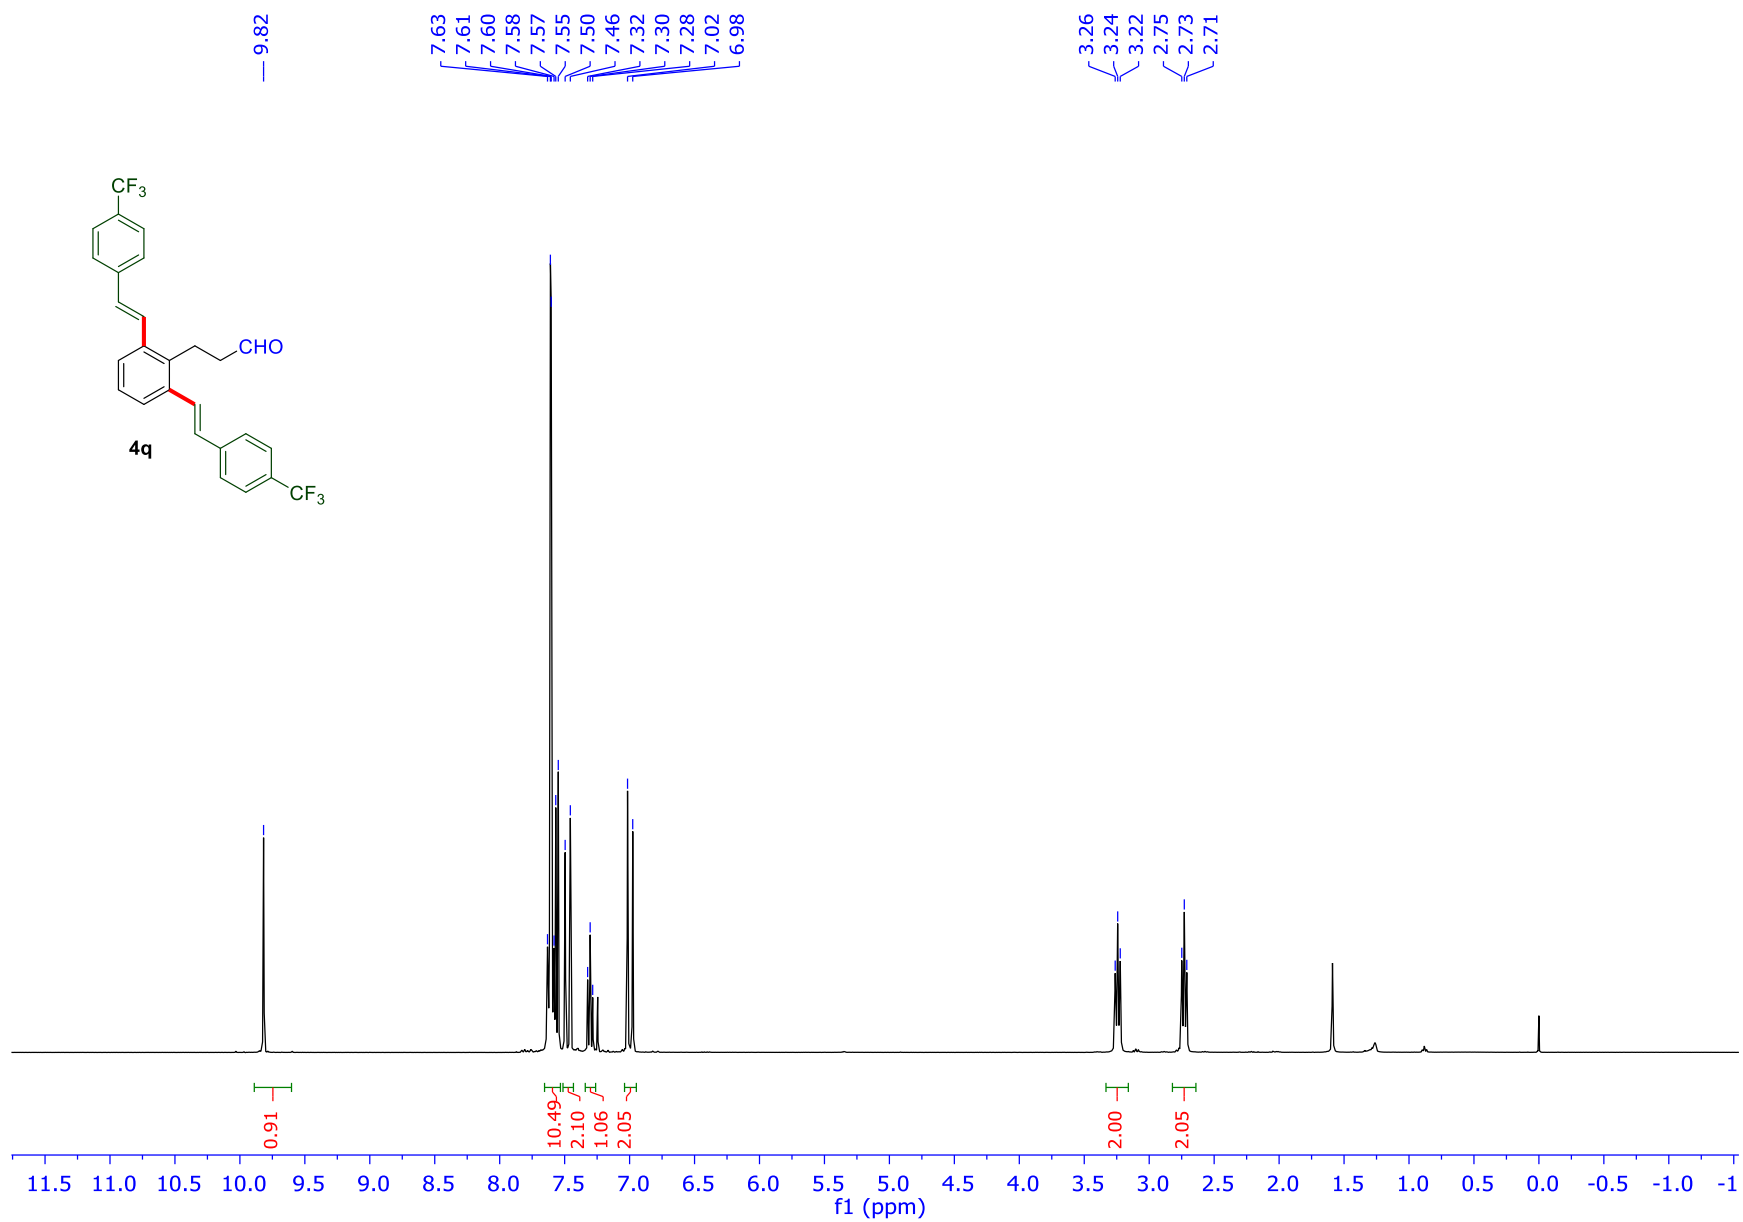

S352



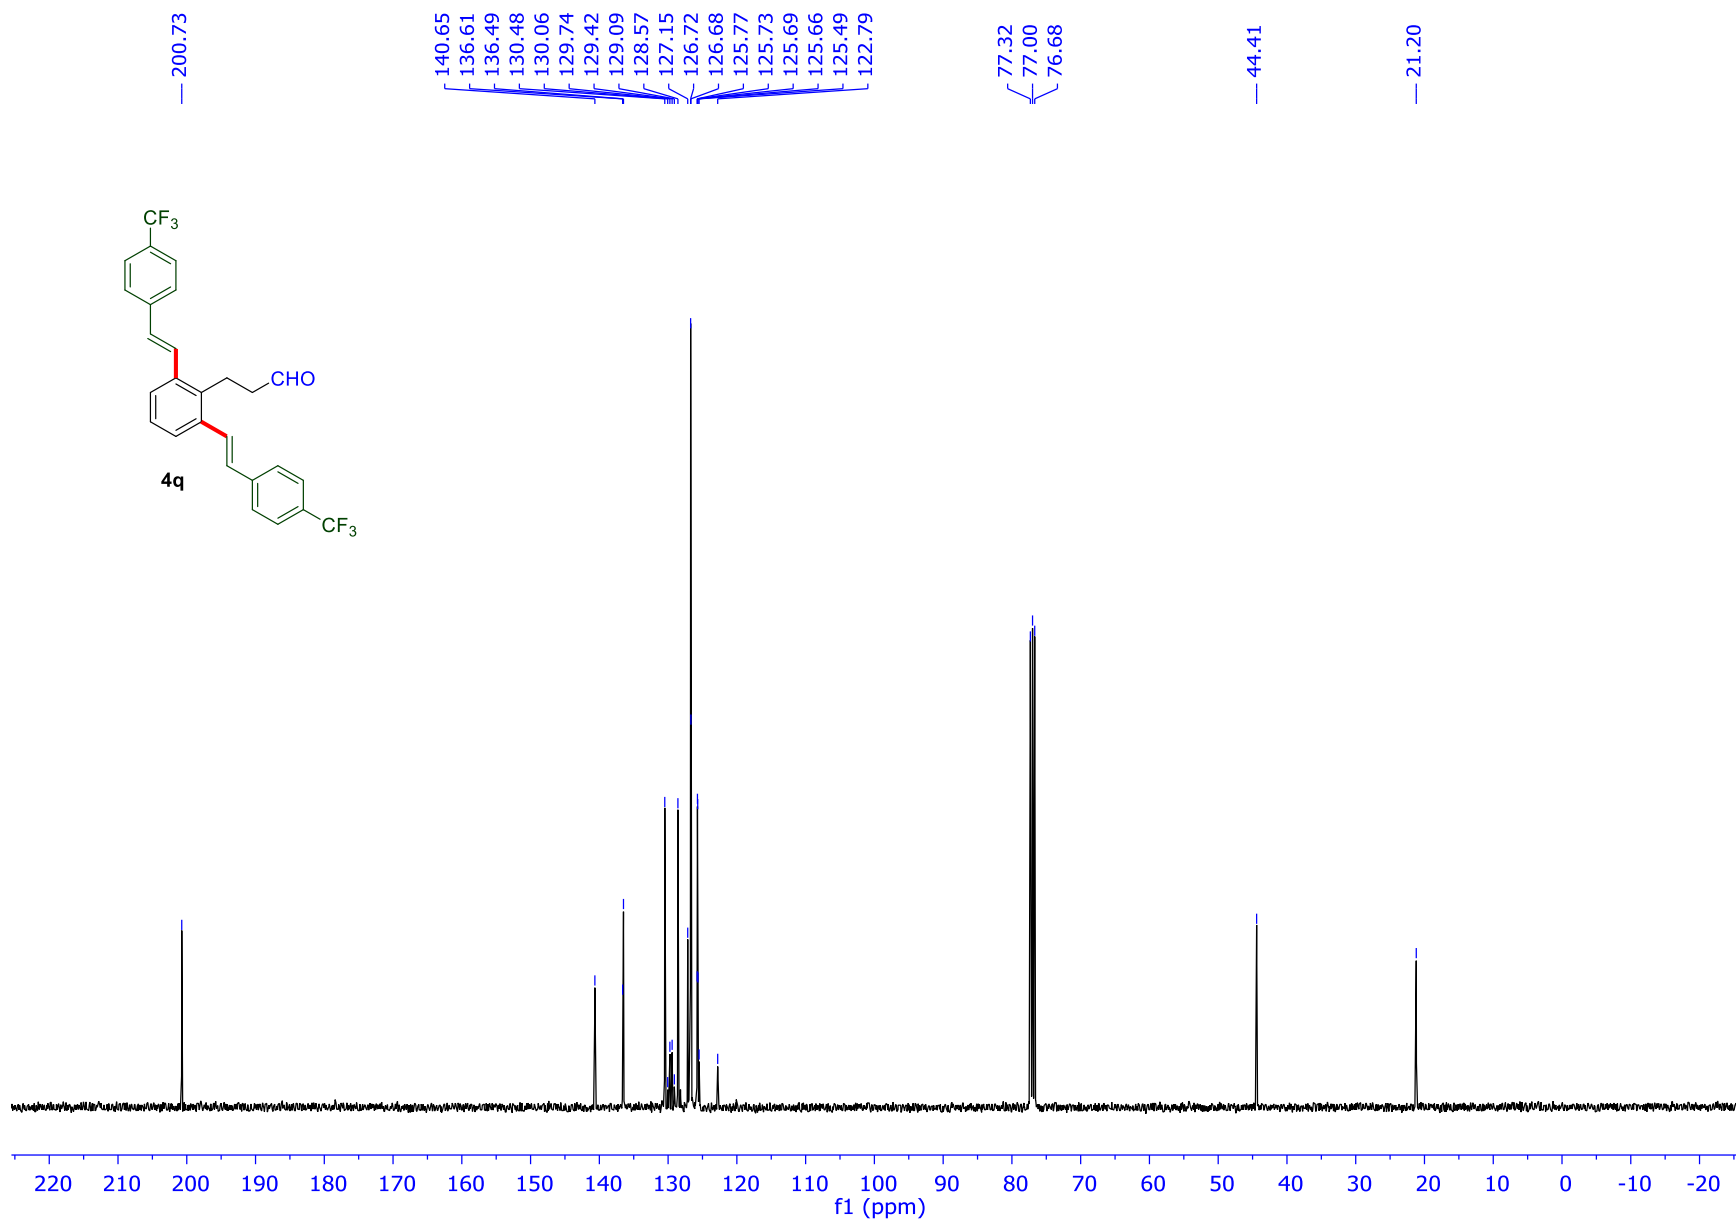

S353

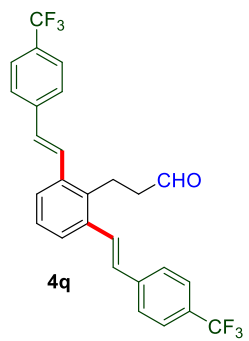

-62.36

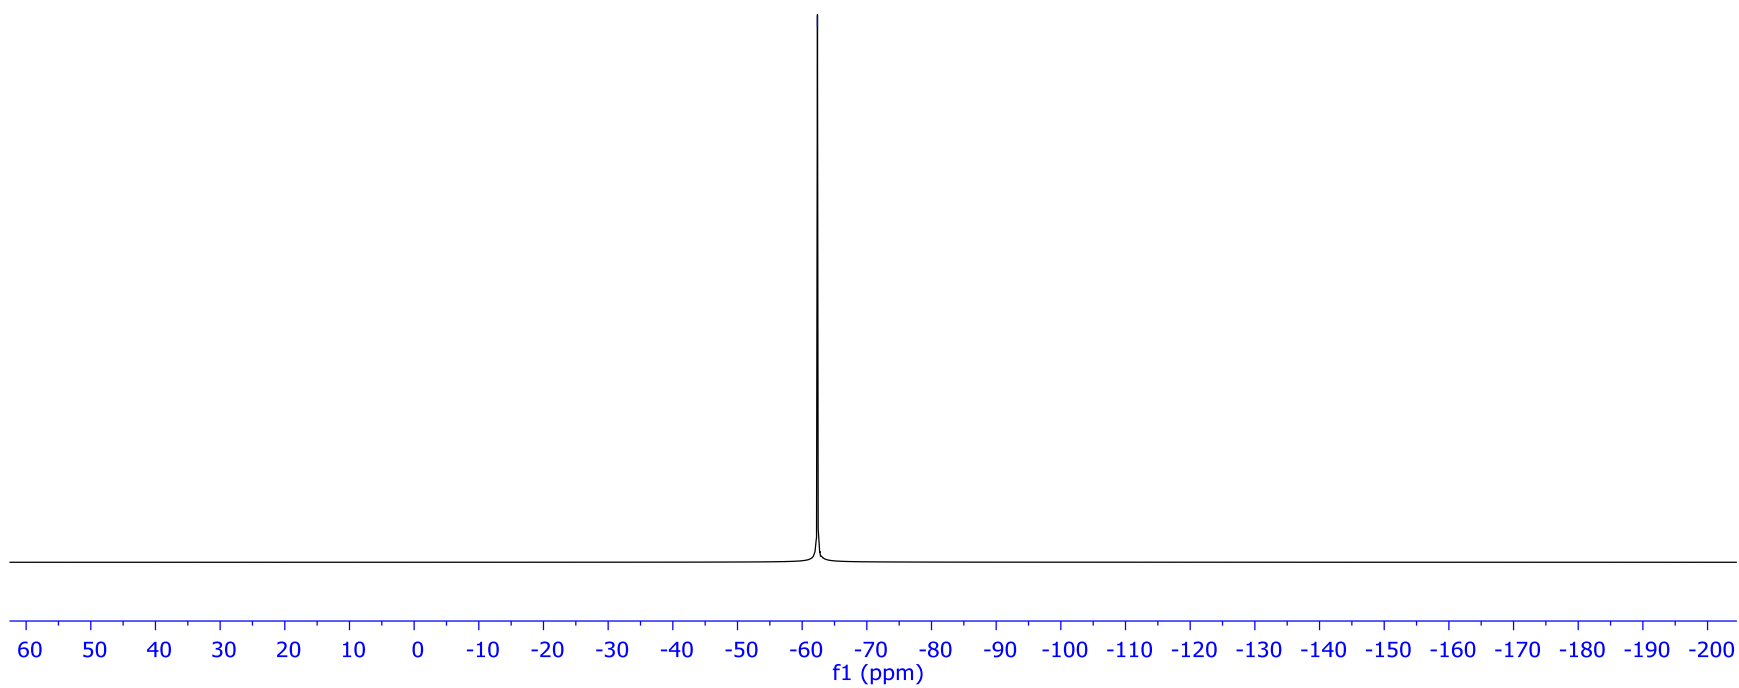

S354

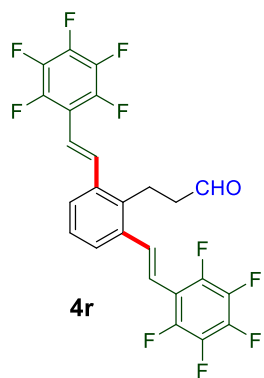

— 9.83

7.73  
7.69  
7.59  
7.58  
7.37  
7.35  
7.33  
6.88  
6.84

3.20  
3.18  
3.16  
2.73  
2.71  
2.69

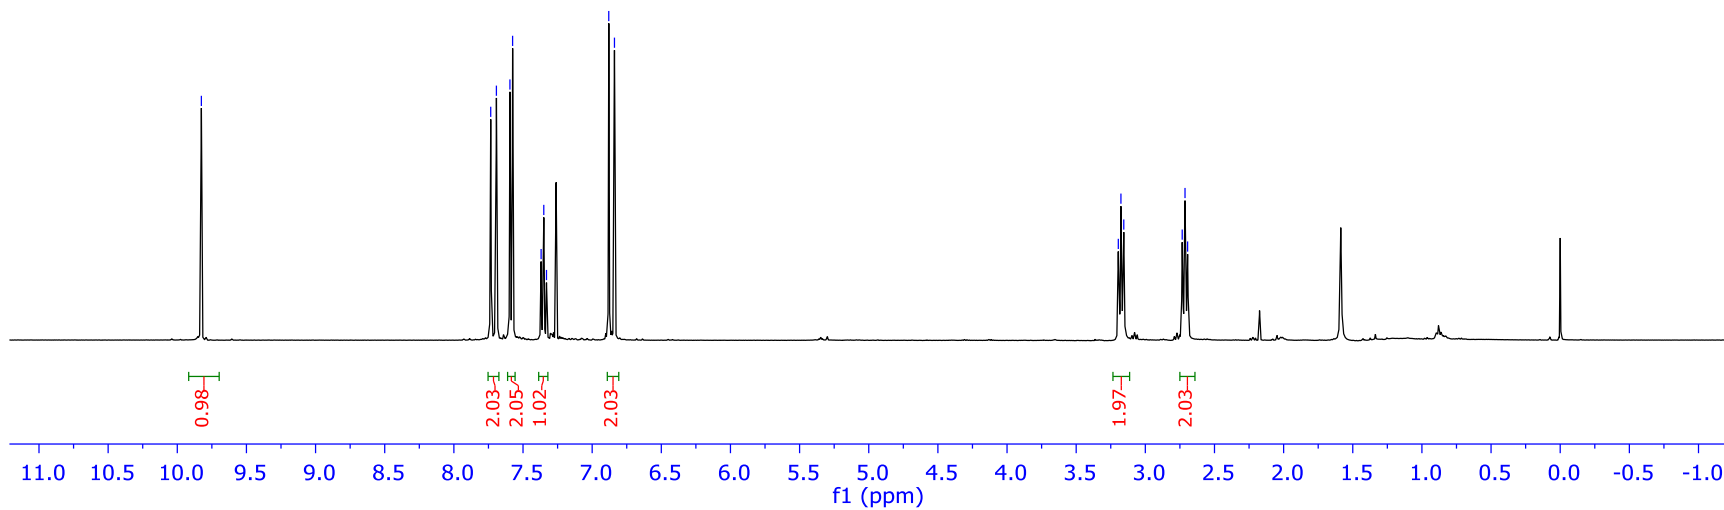

S355

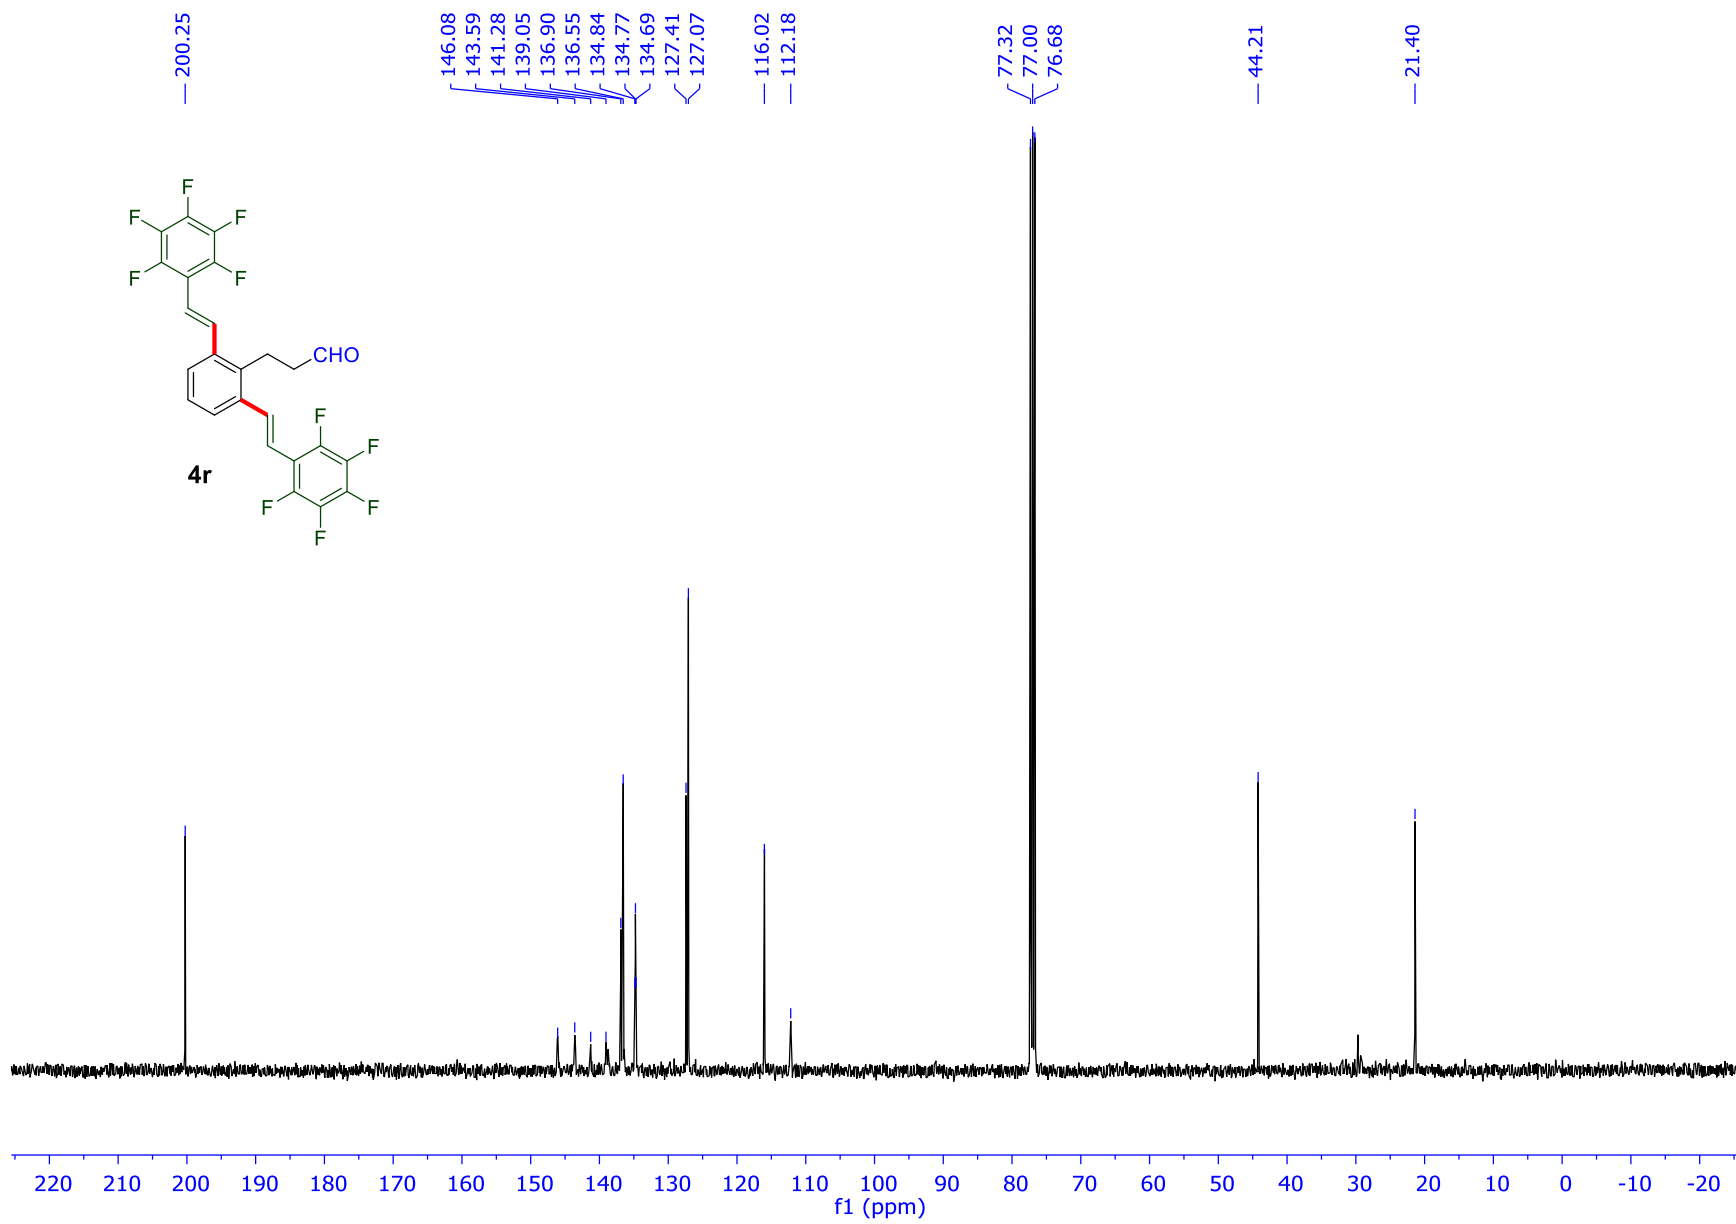

S356

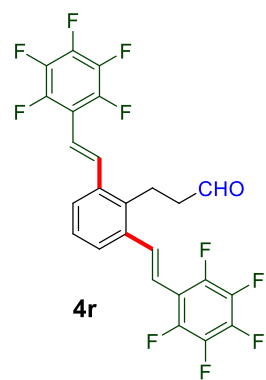

-142.59  
-142.65  
-155.51  
-162.35

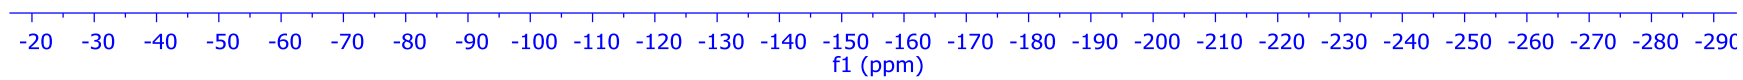

S357

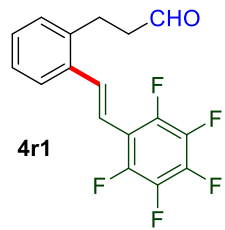

9.82

7.67  
7.63  
7.61  
7.60  
7.60  
7.60  
7.59  
7.29  
7.28  
7.28  
7.28  
7.27  
7.23  
7.22  
7.21  
7.21  
7.20  
6.89  
6.85

3.09  
3.07  
3.07  
3.05  
2.78  
2.78  
2.76  
2.76  
2.74  
2.74

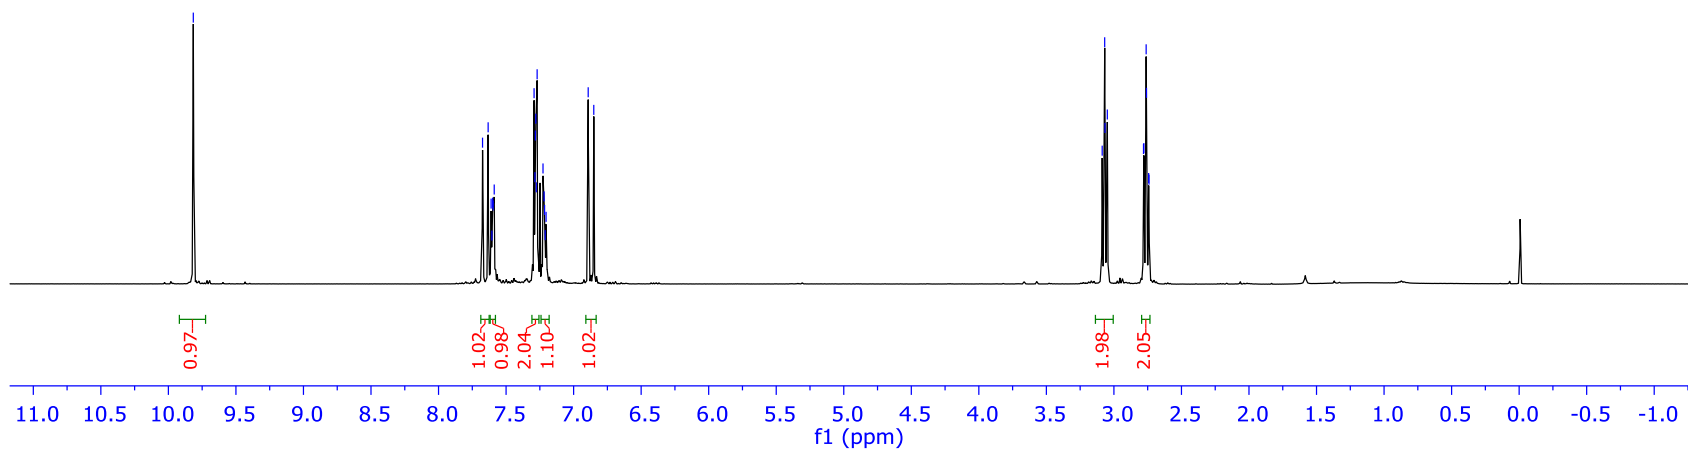

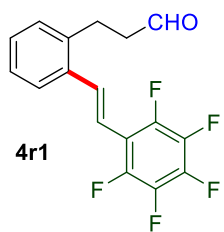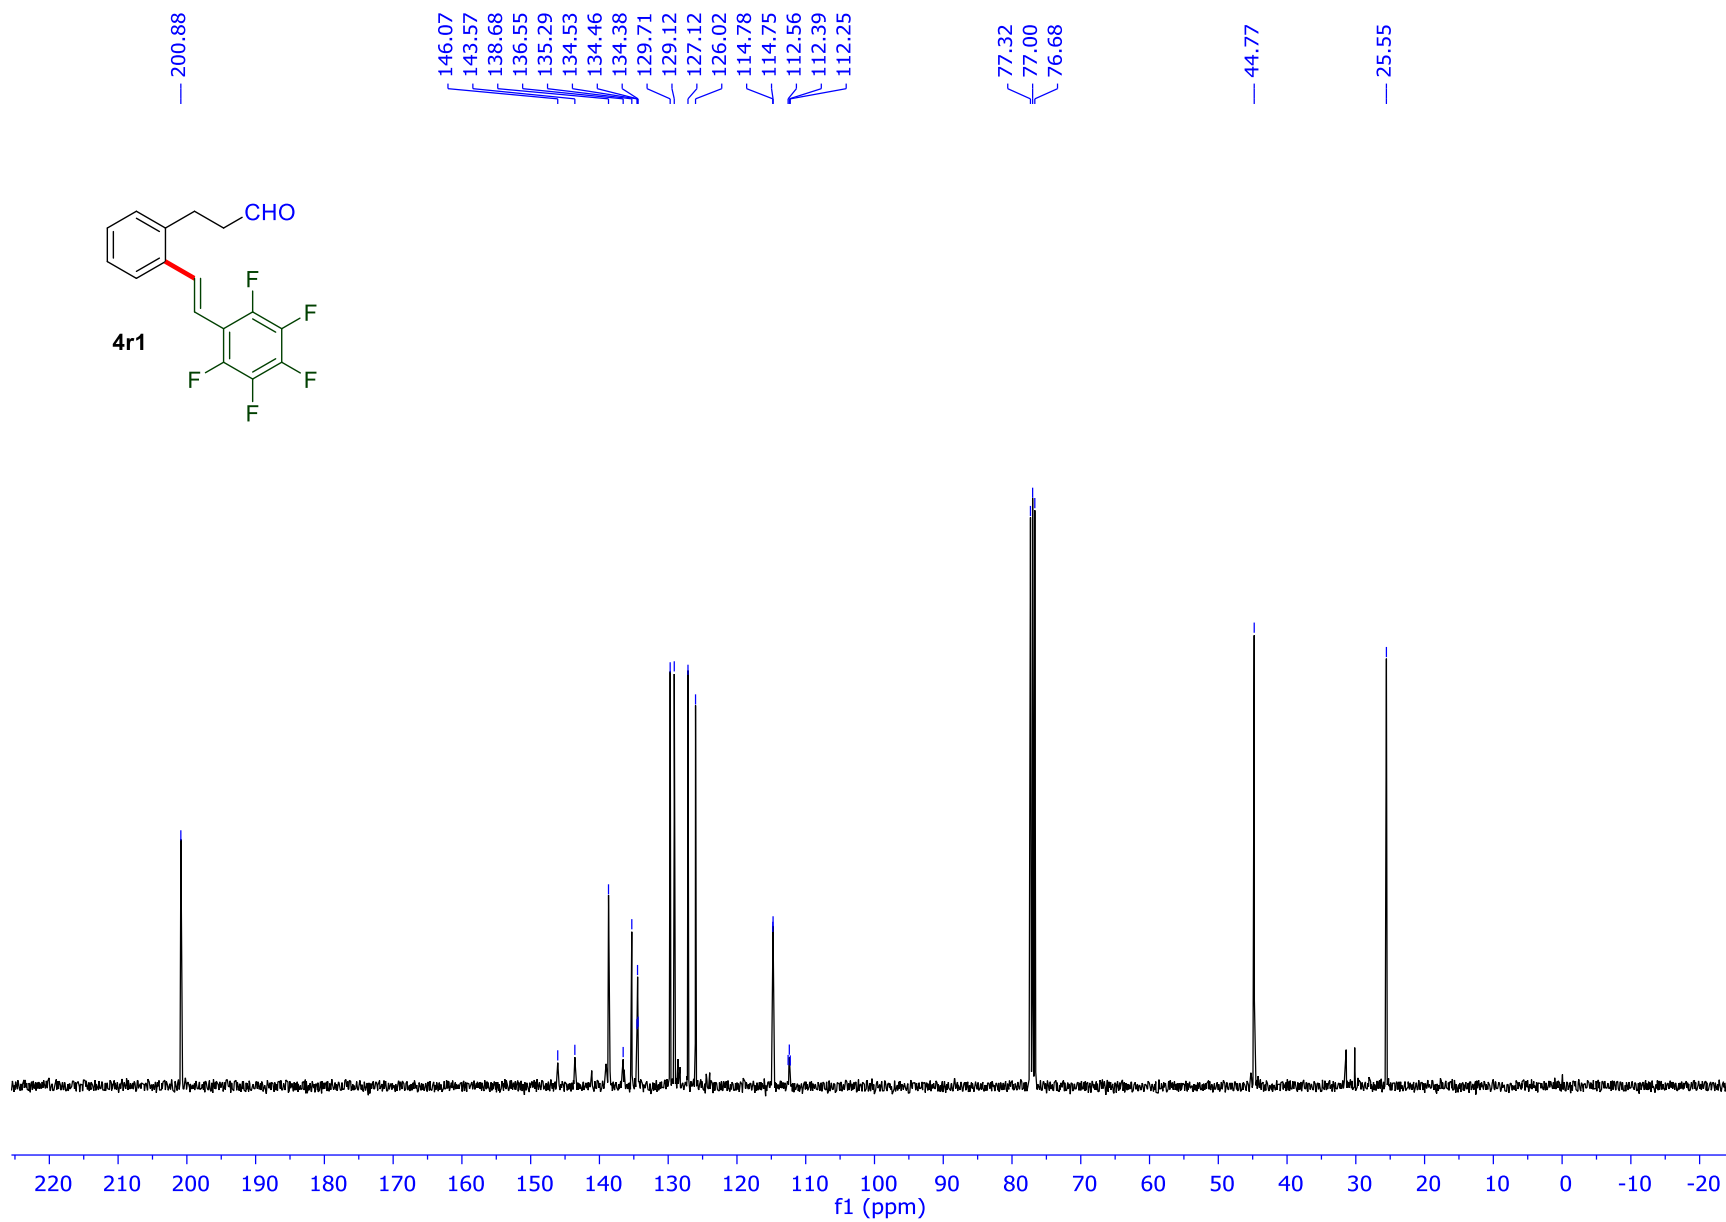

S359

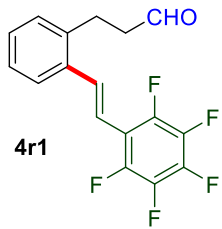

-142.71  
-142.78

-155.96

-162.55

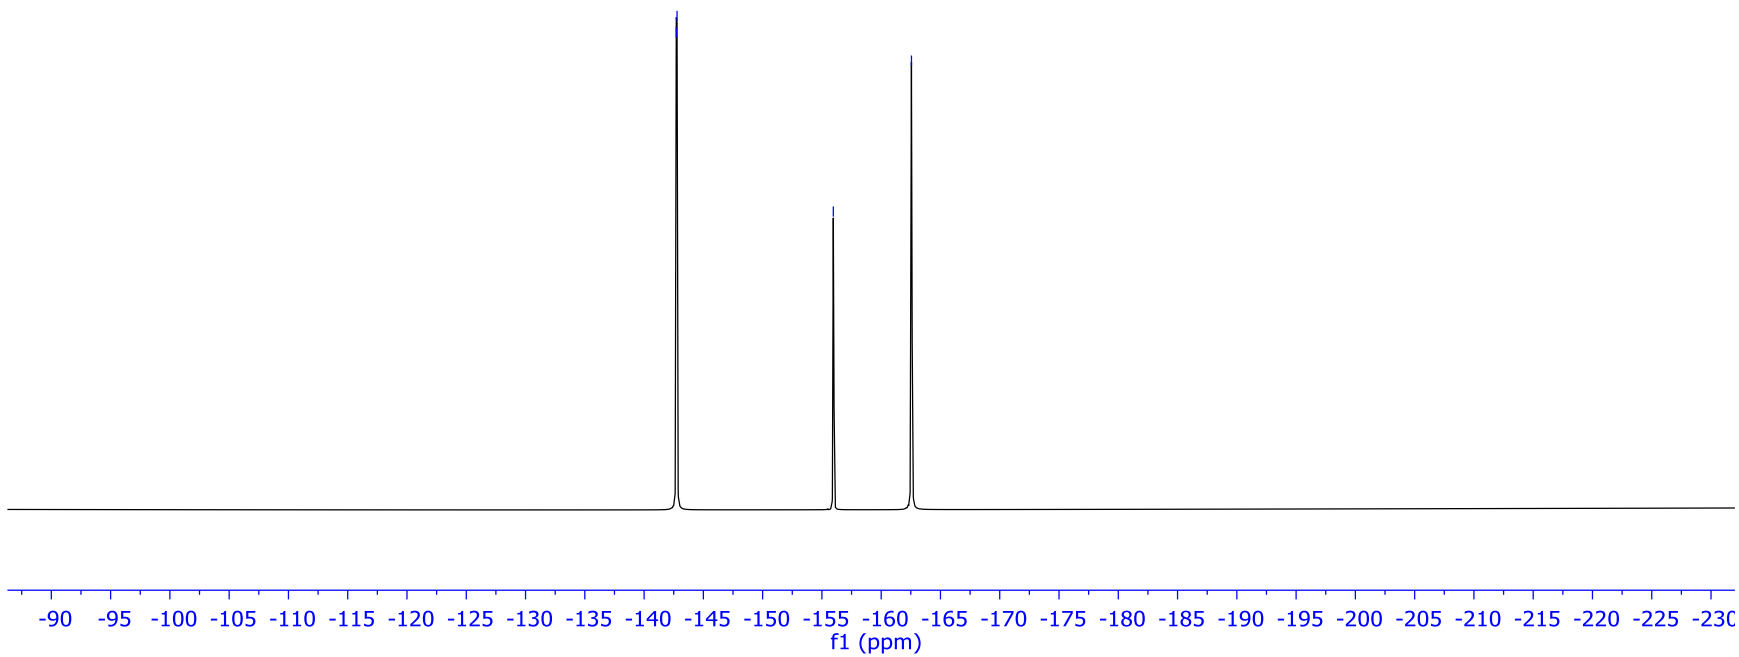

S360



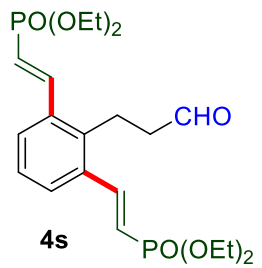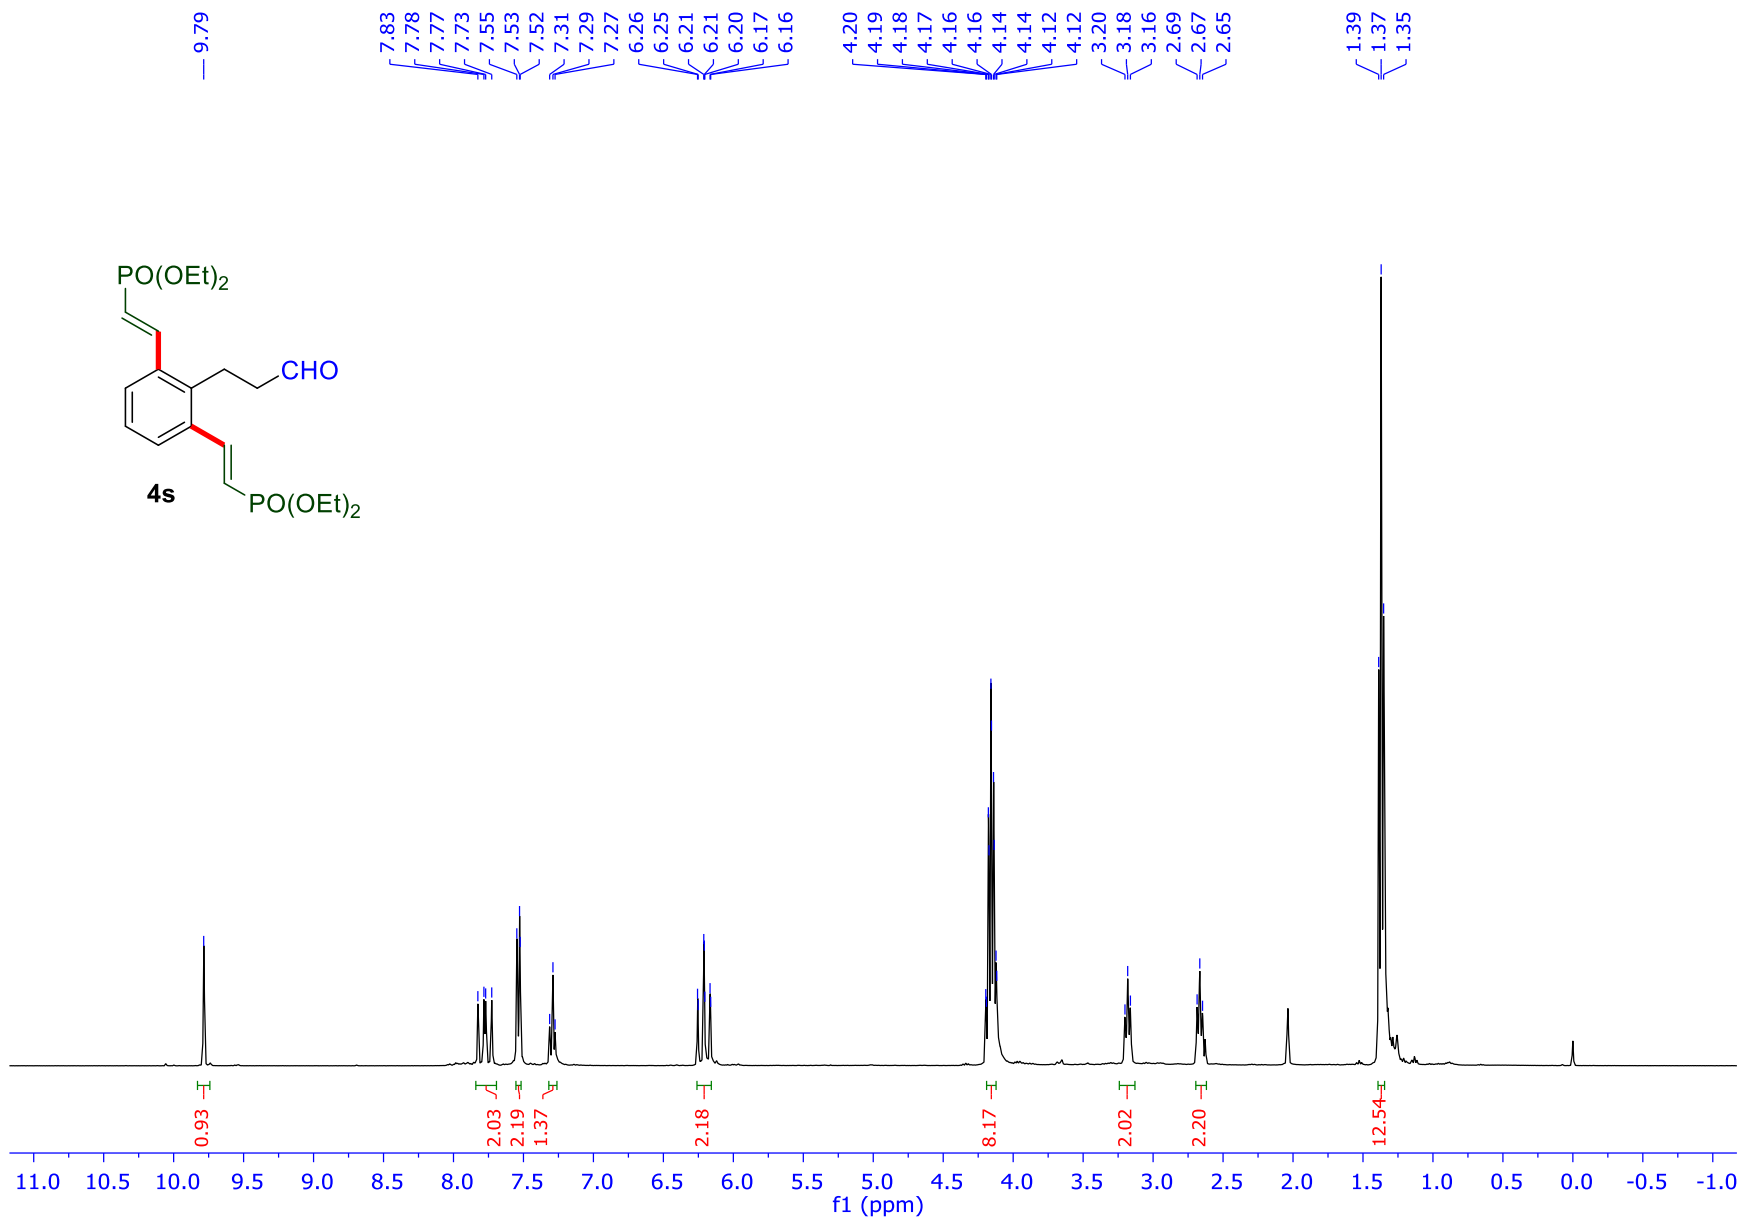

S361

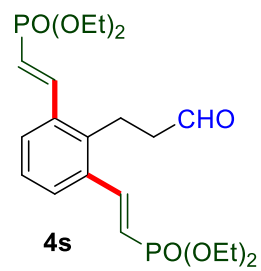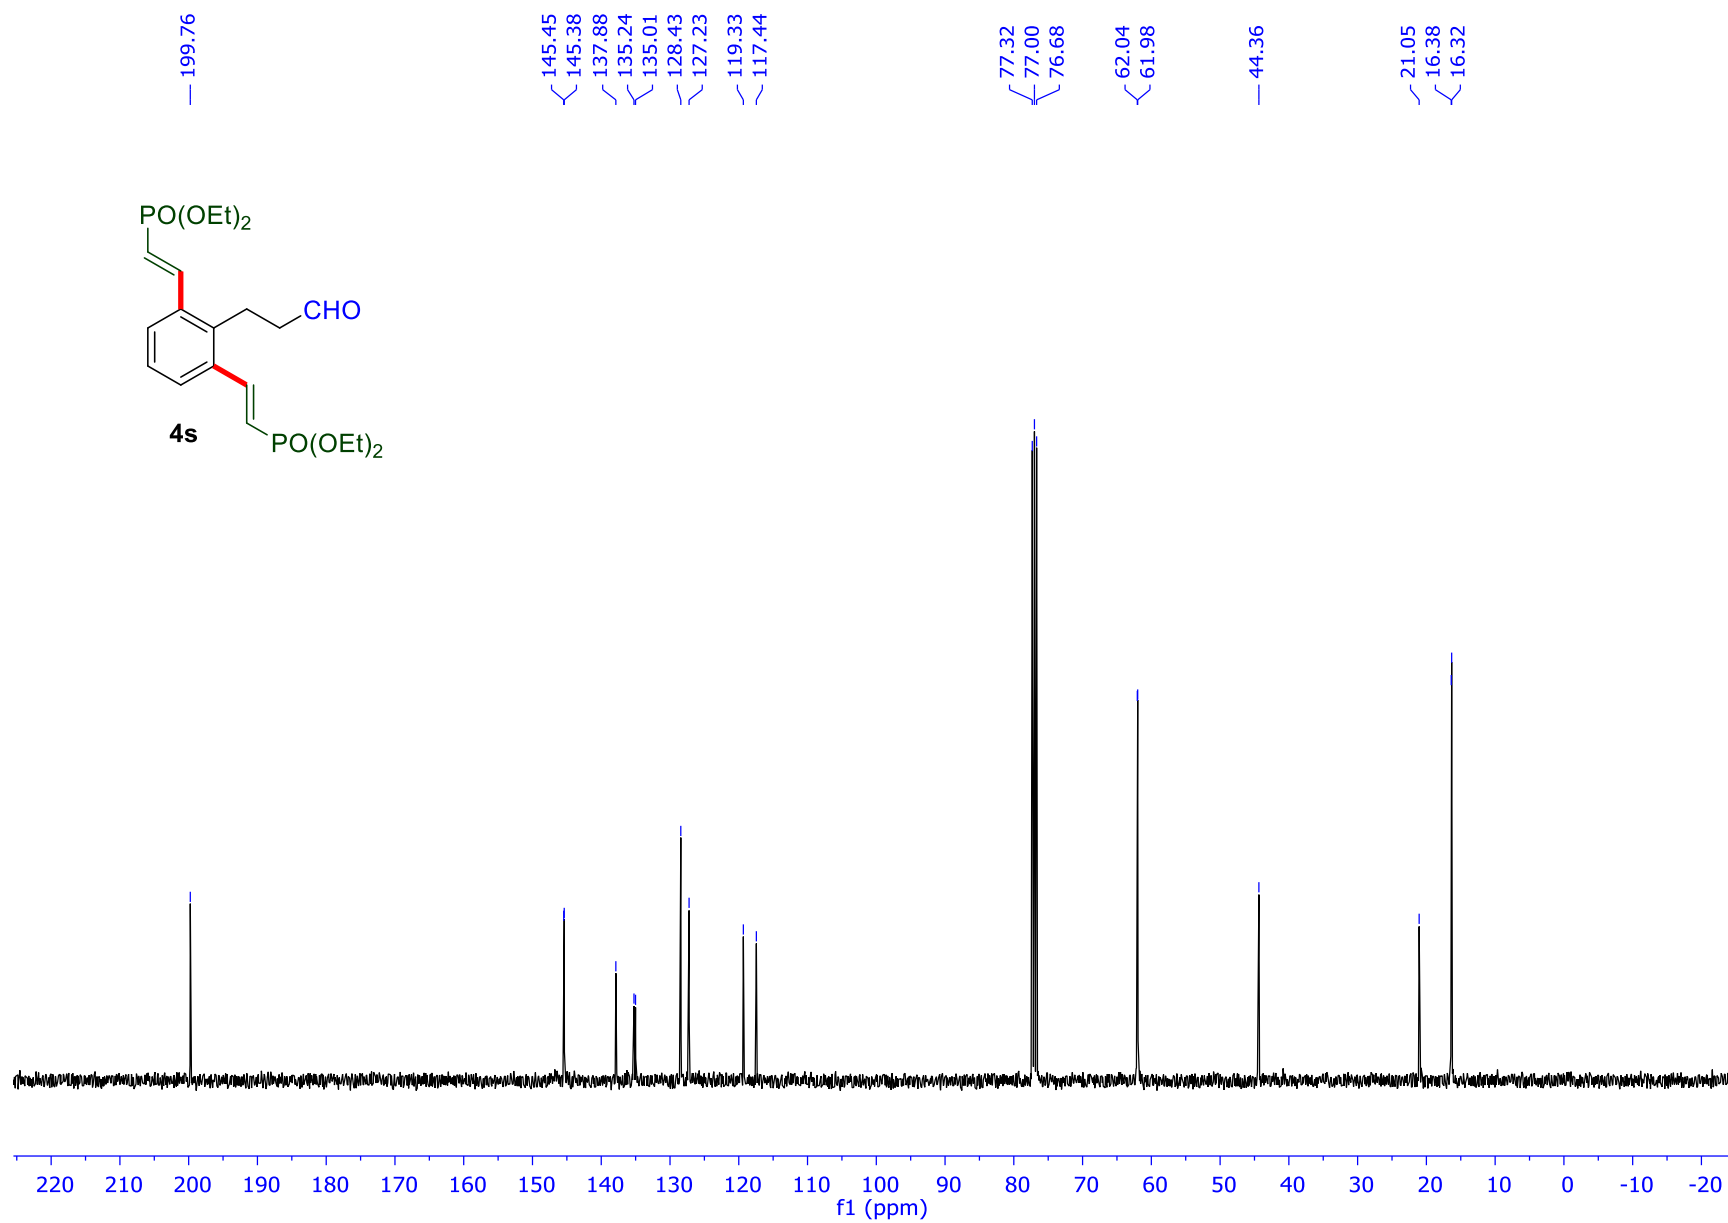

S362

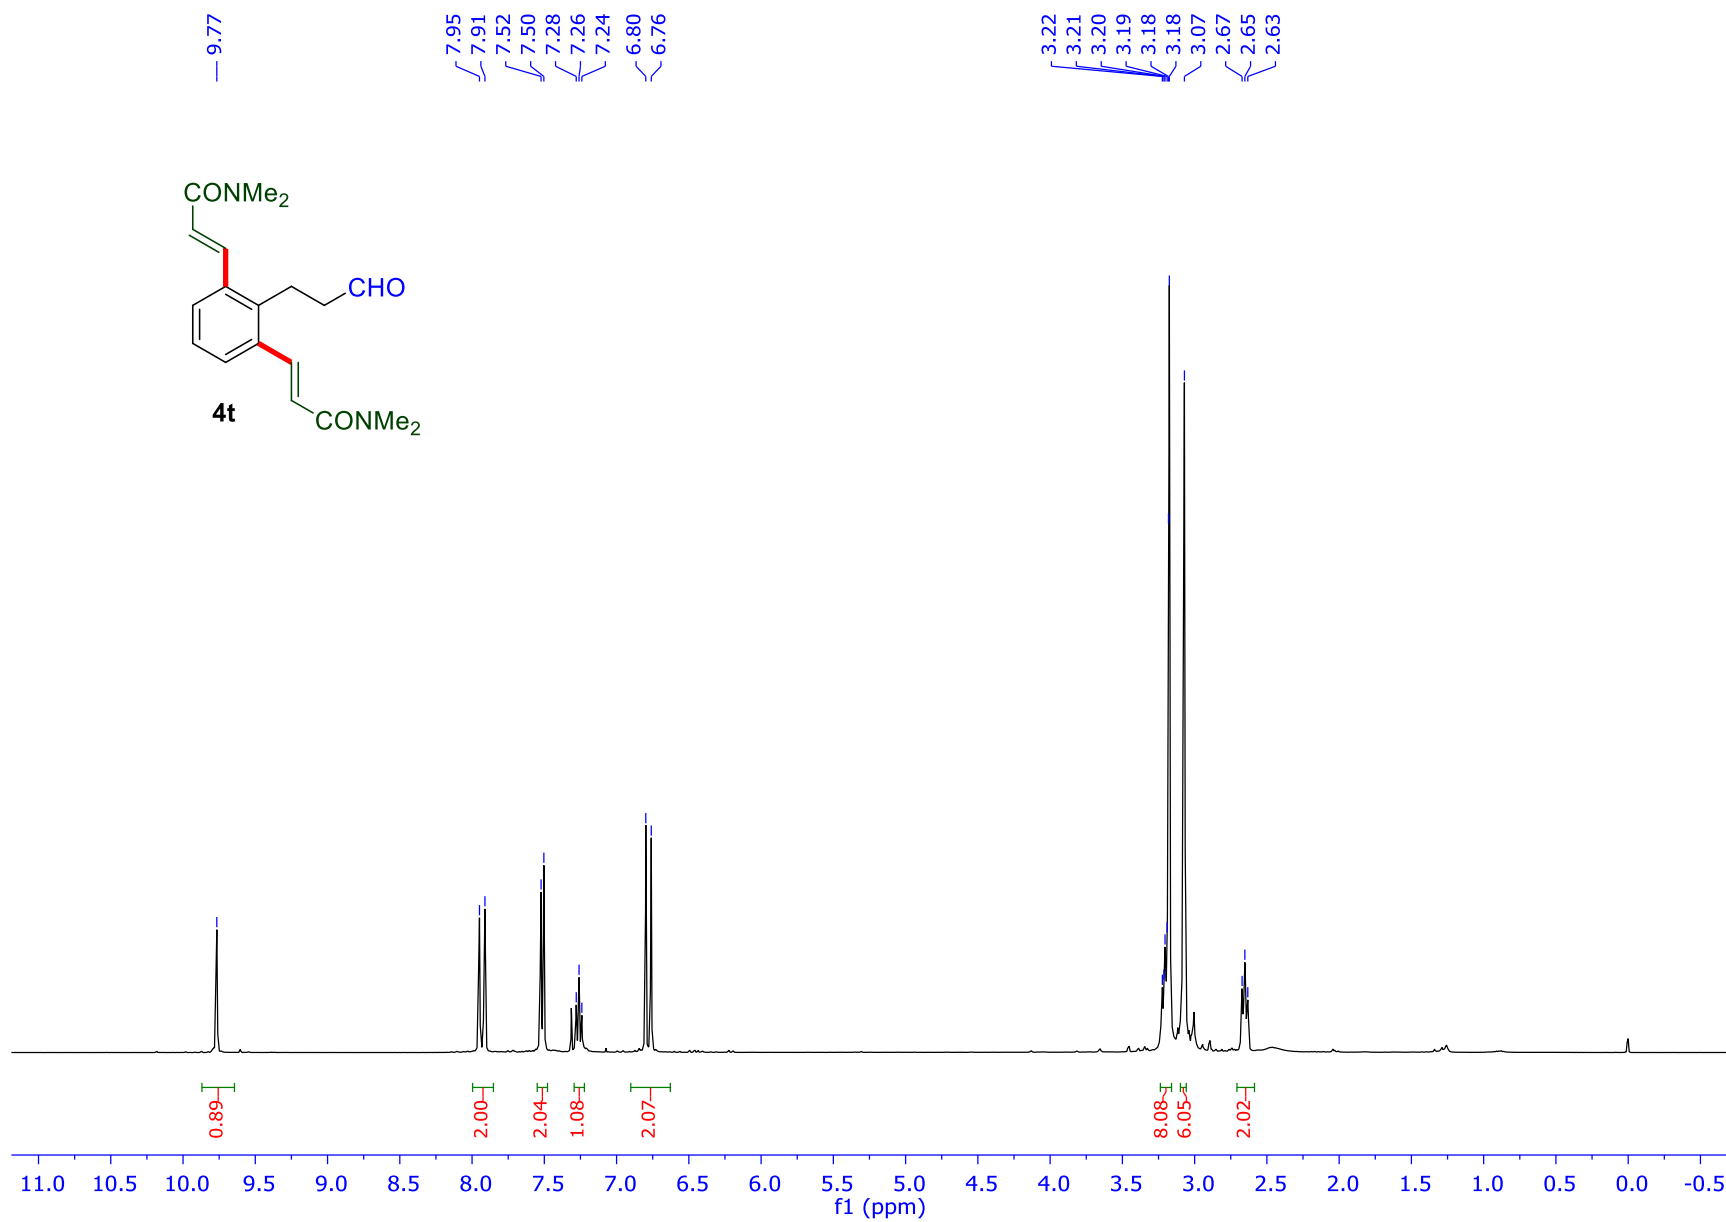

S363

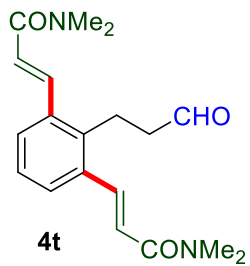

— 200.25

— 166.08

— 139.41

— 138.12

— 135.39

— 127.92

— 126.85

— 121.06

— 77.32

— 77.00

— 76.68

— 44.17

— 37.28

— 35.74

— 21.50

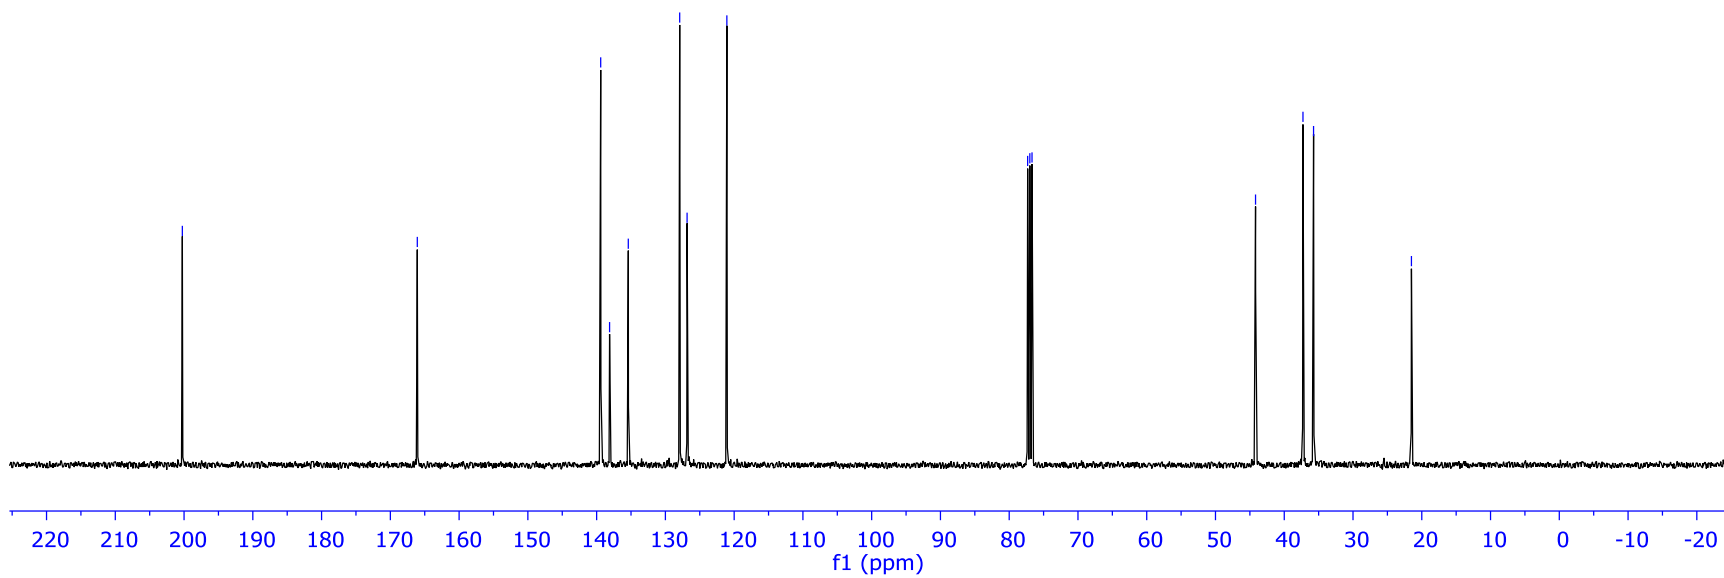

S364

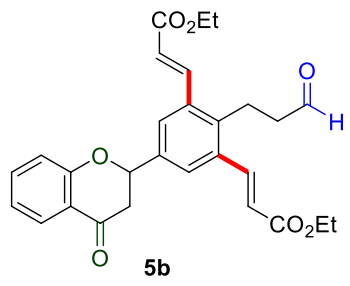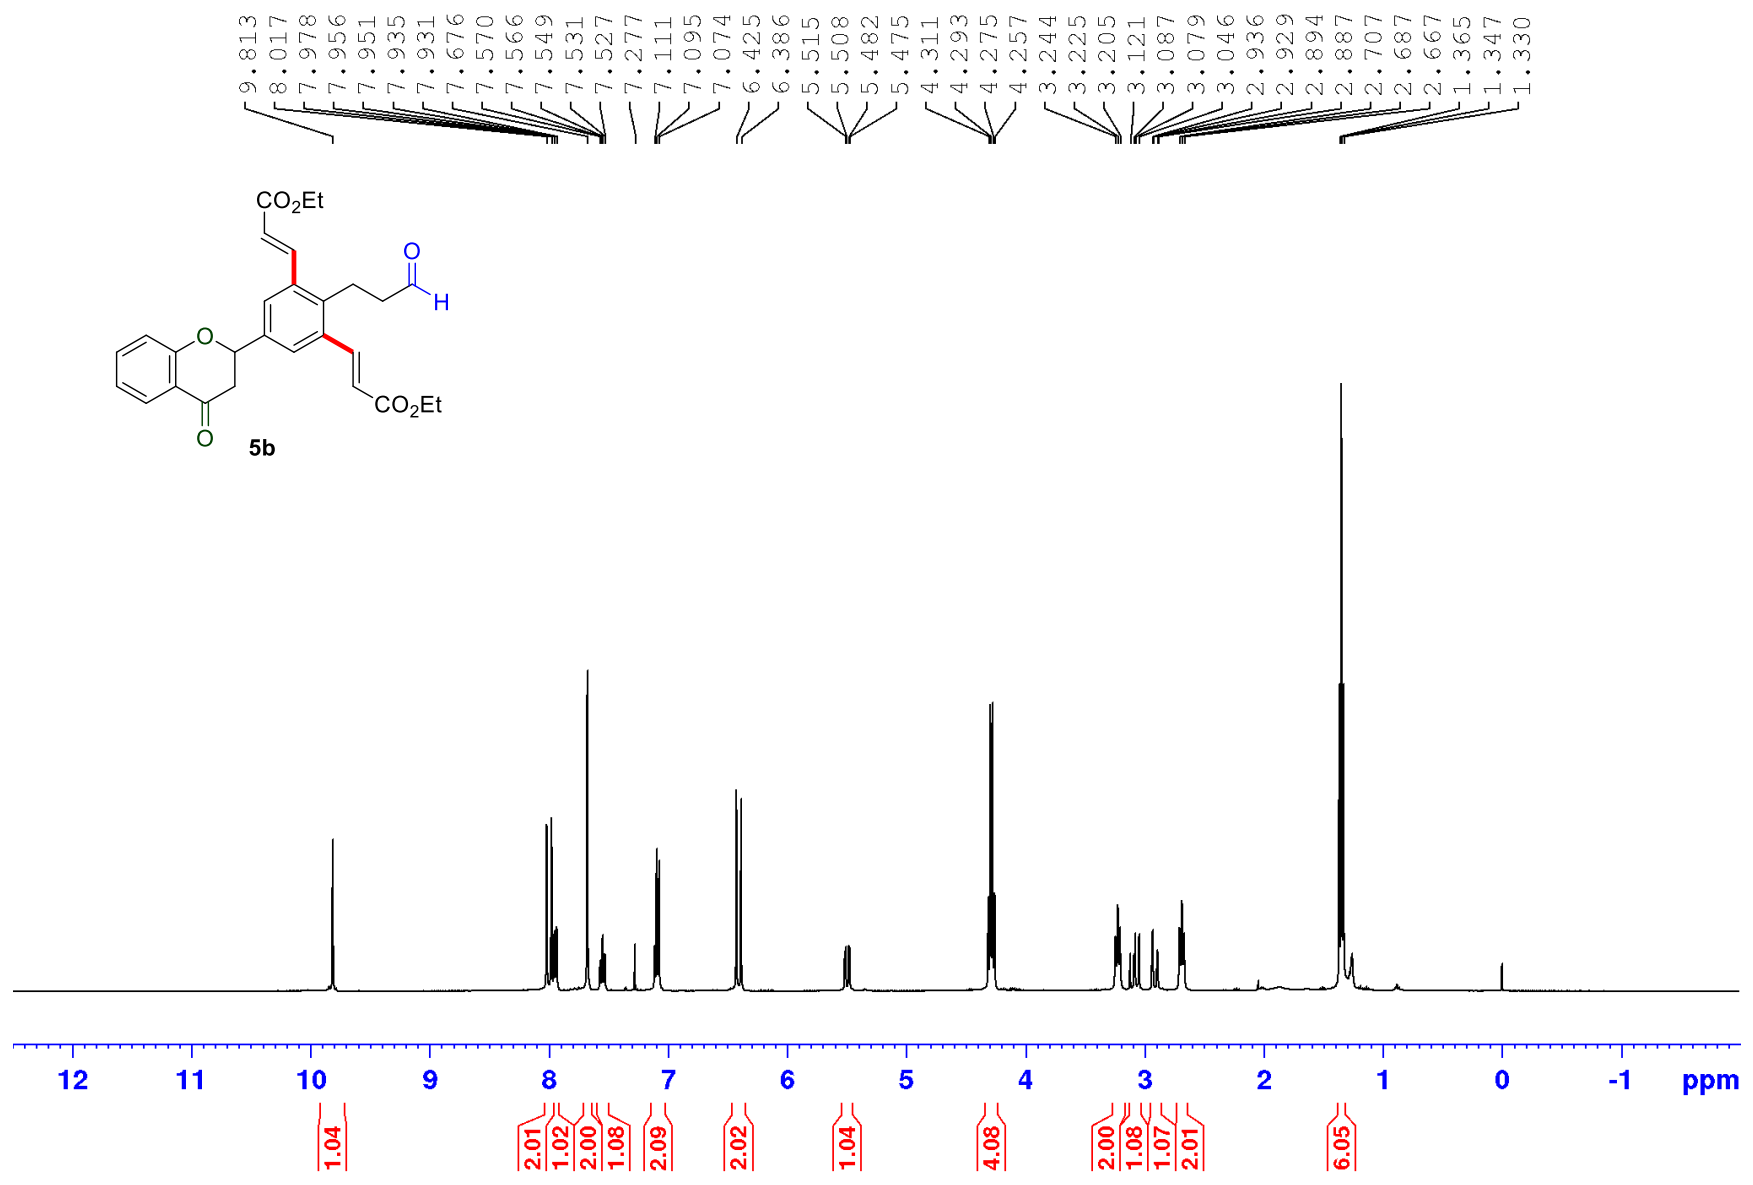

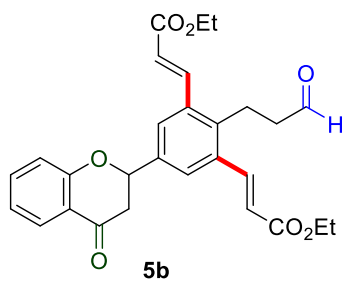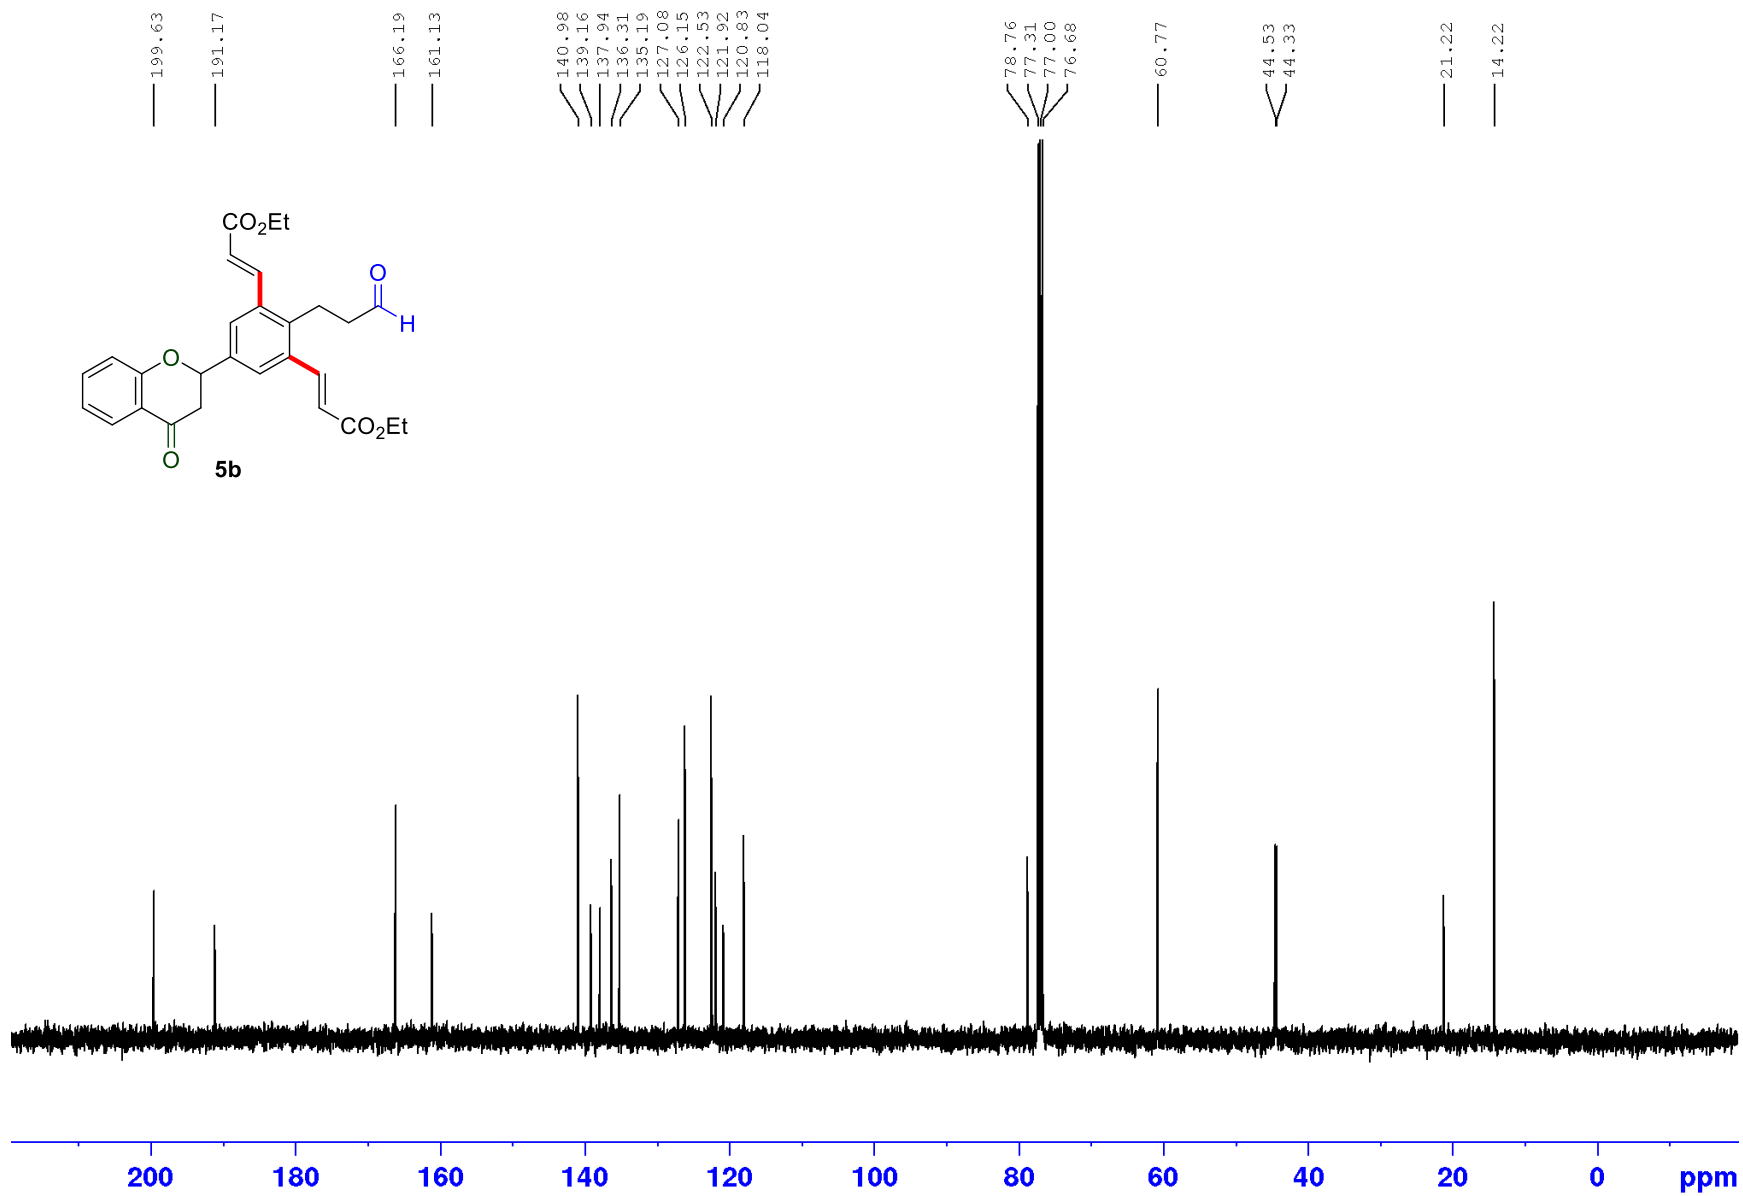

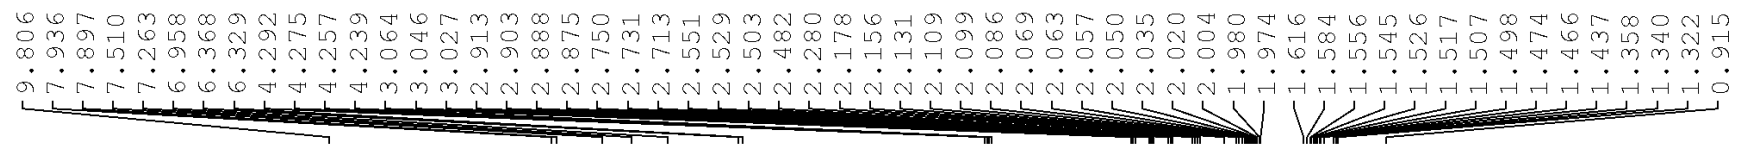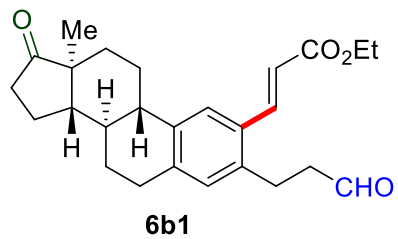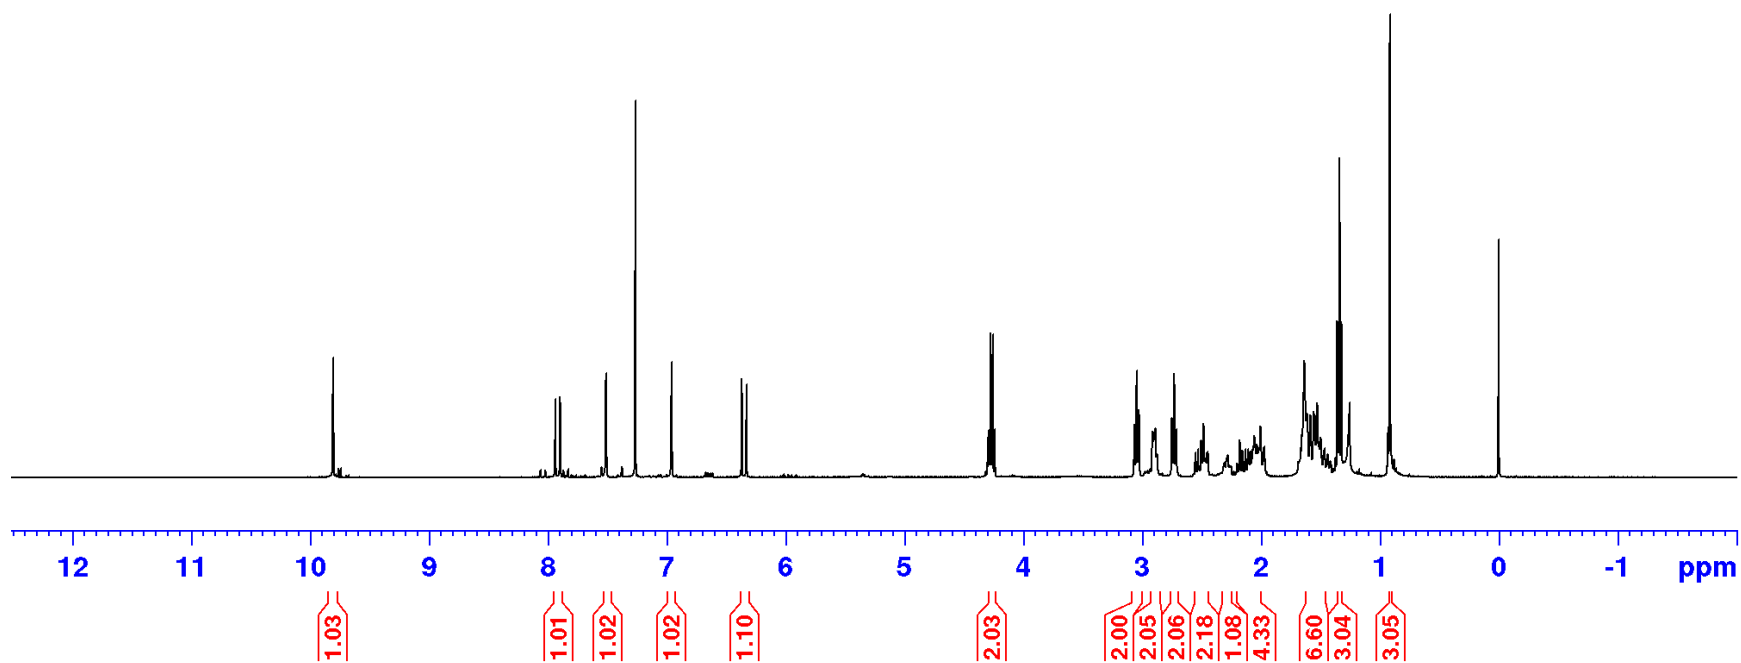

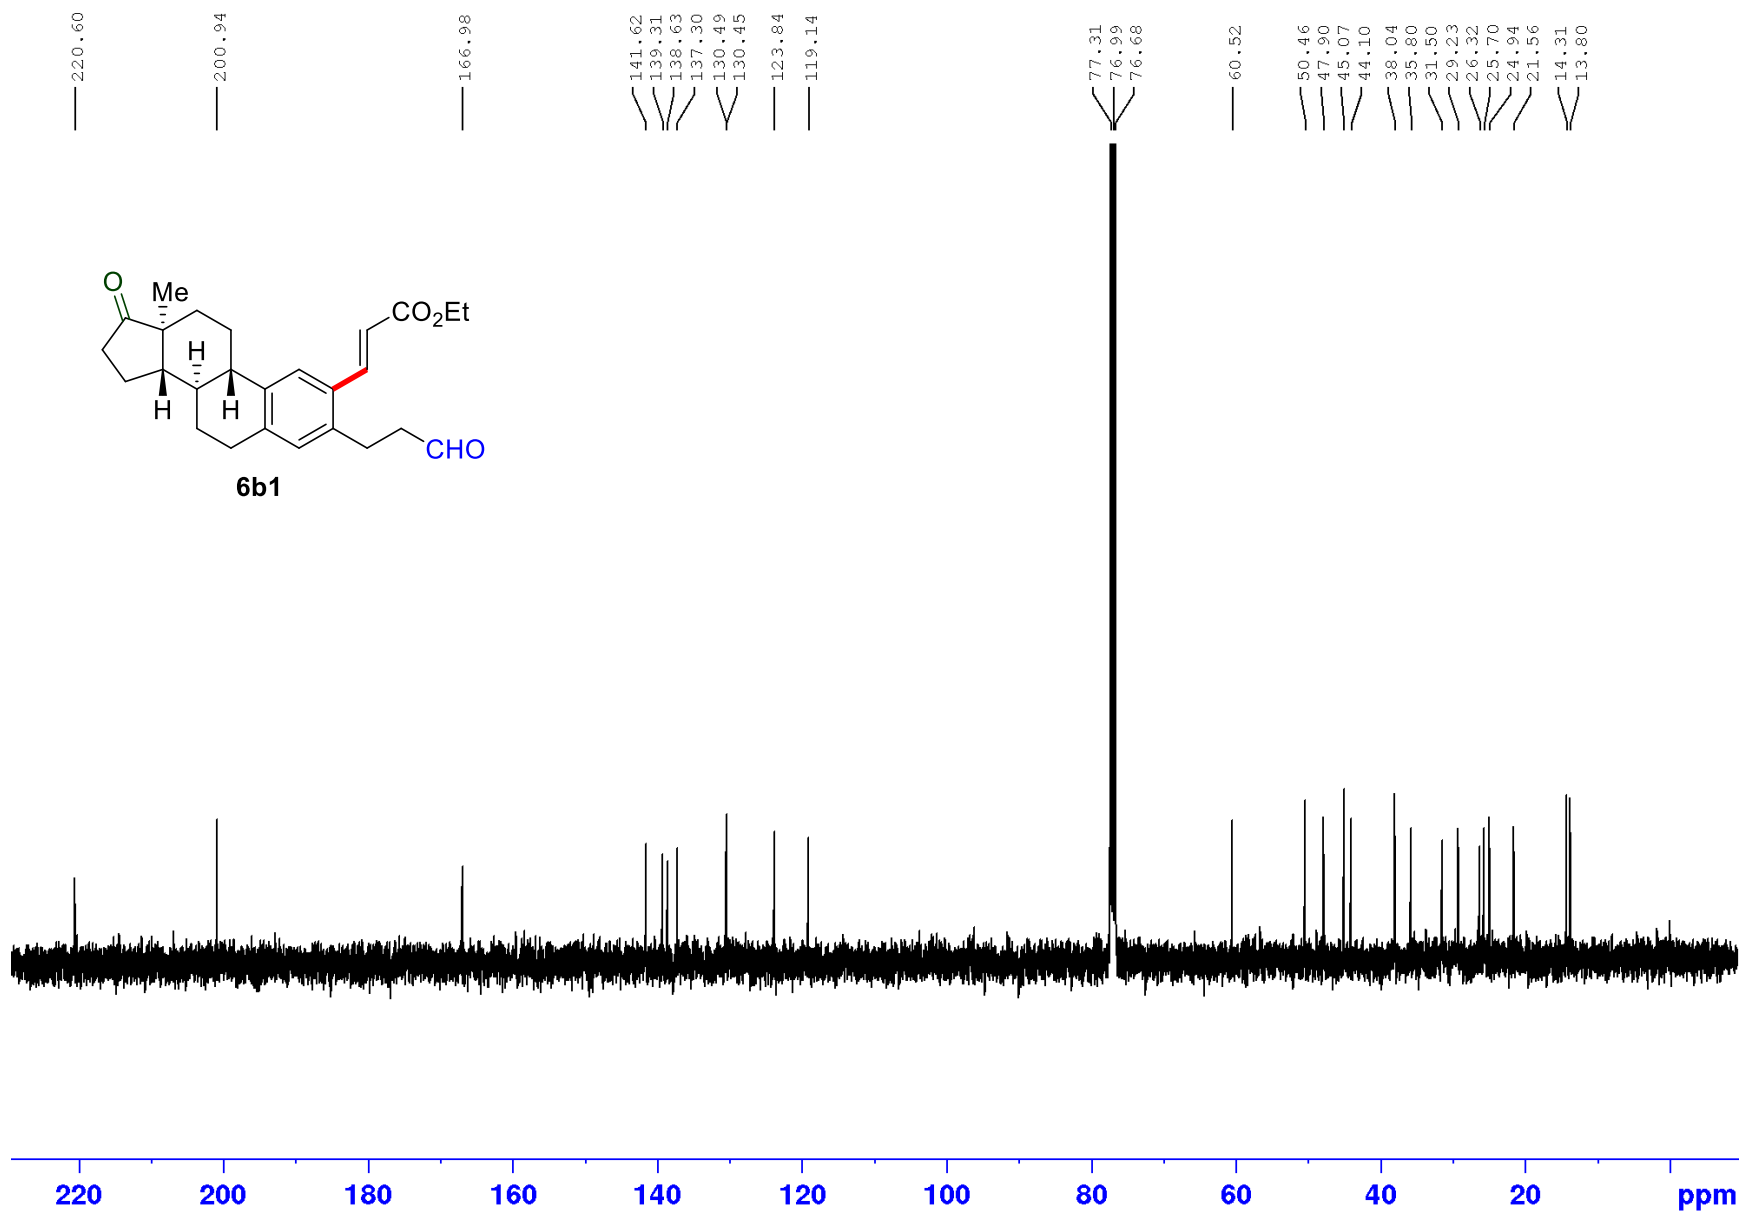



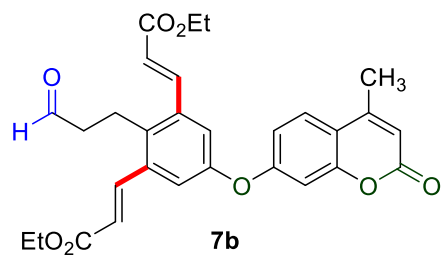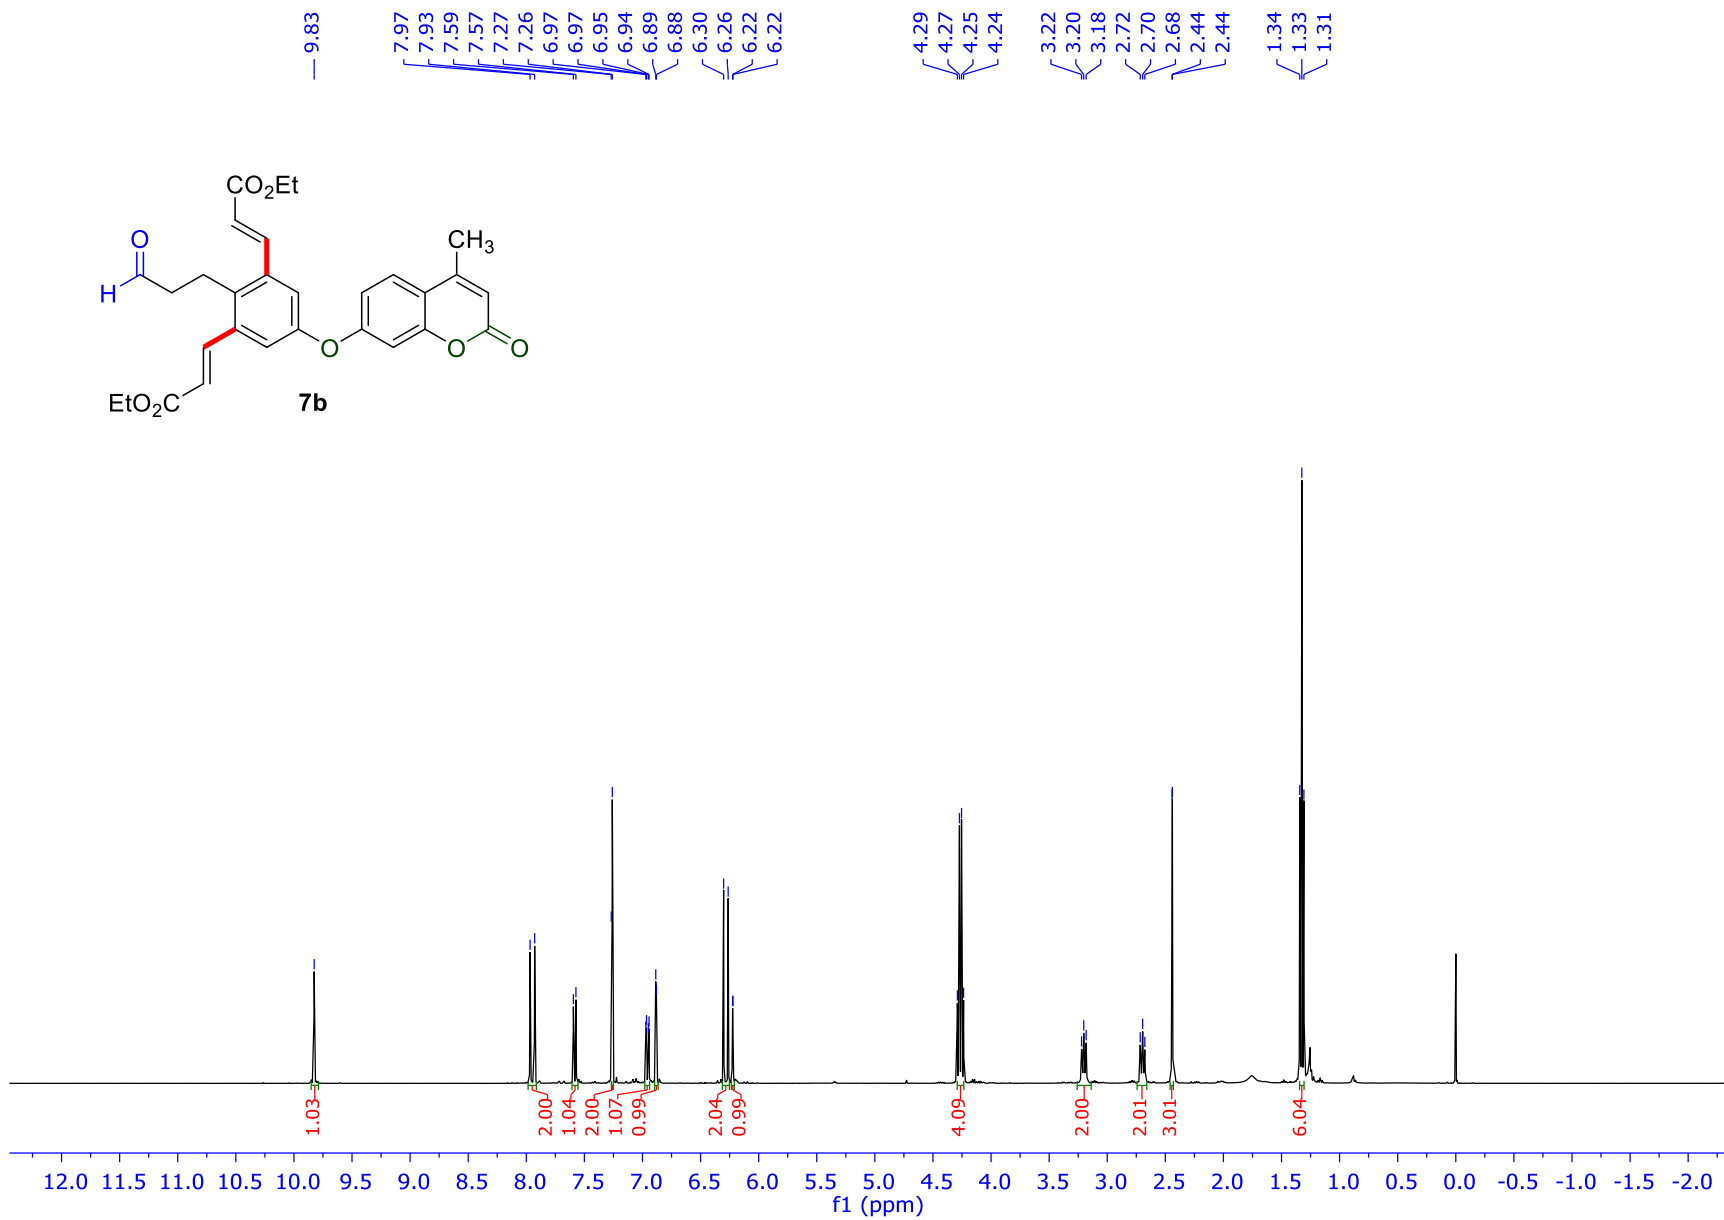

S369

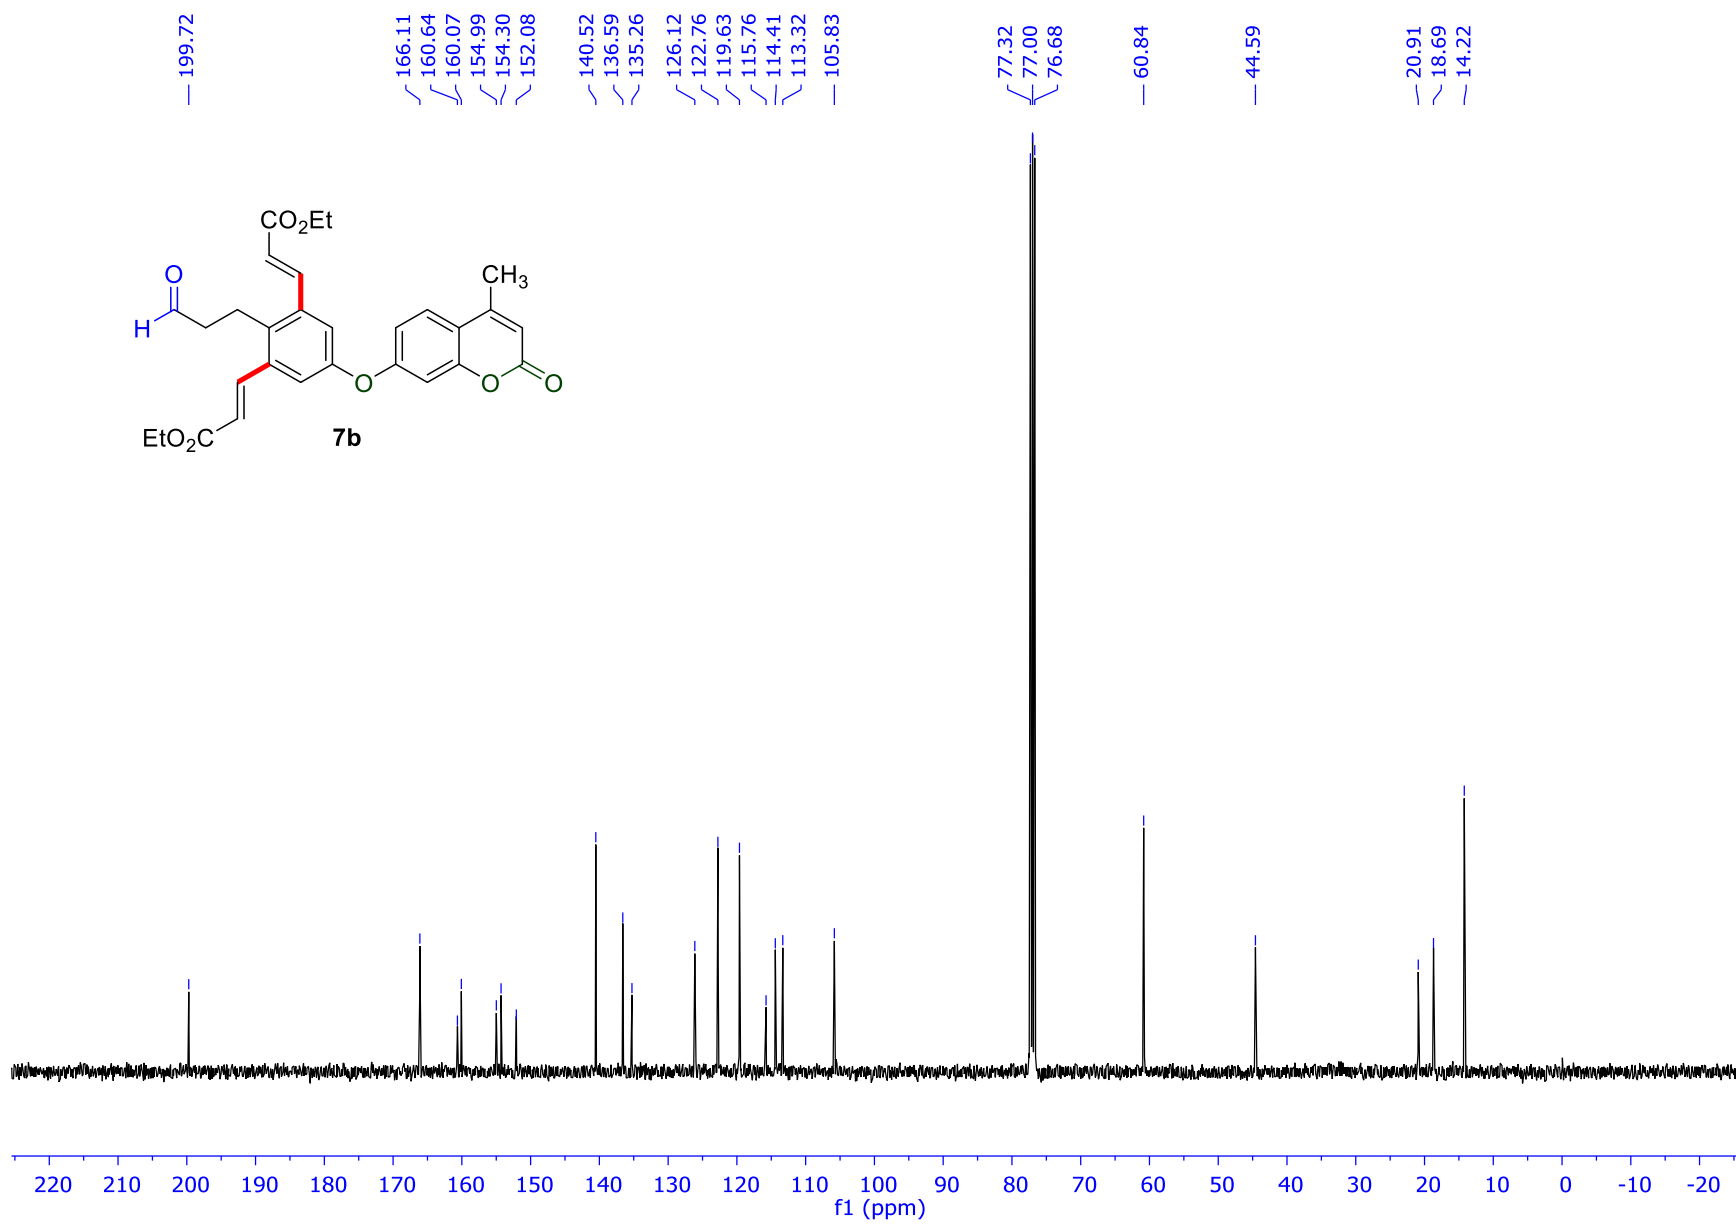

S370

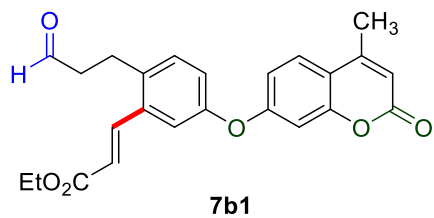

9.84  
 7.93  
 7.89  
 7.57  
 7.55  
 7.29  
 7.27  
 7.27  
 7.26  
 7.06  
 7.05  
 7.04  
 7.03  
 6.96  
 6.95  
 6.94  
 6.93  
 6.85  
 6.85  
 6.33  
 6.29  
 6.20

4.29  
 4.27  
 4.25  
 4.24

3.13  
 3.11  
 3.09  
 2.81  
 2.79  
 2.77  
 2.43

1.34  
 1.33  
 1.31

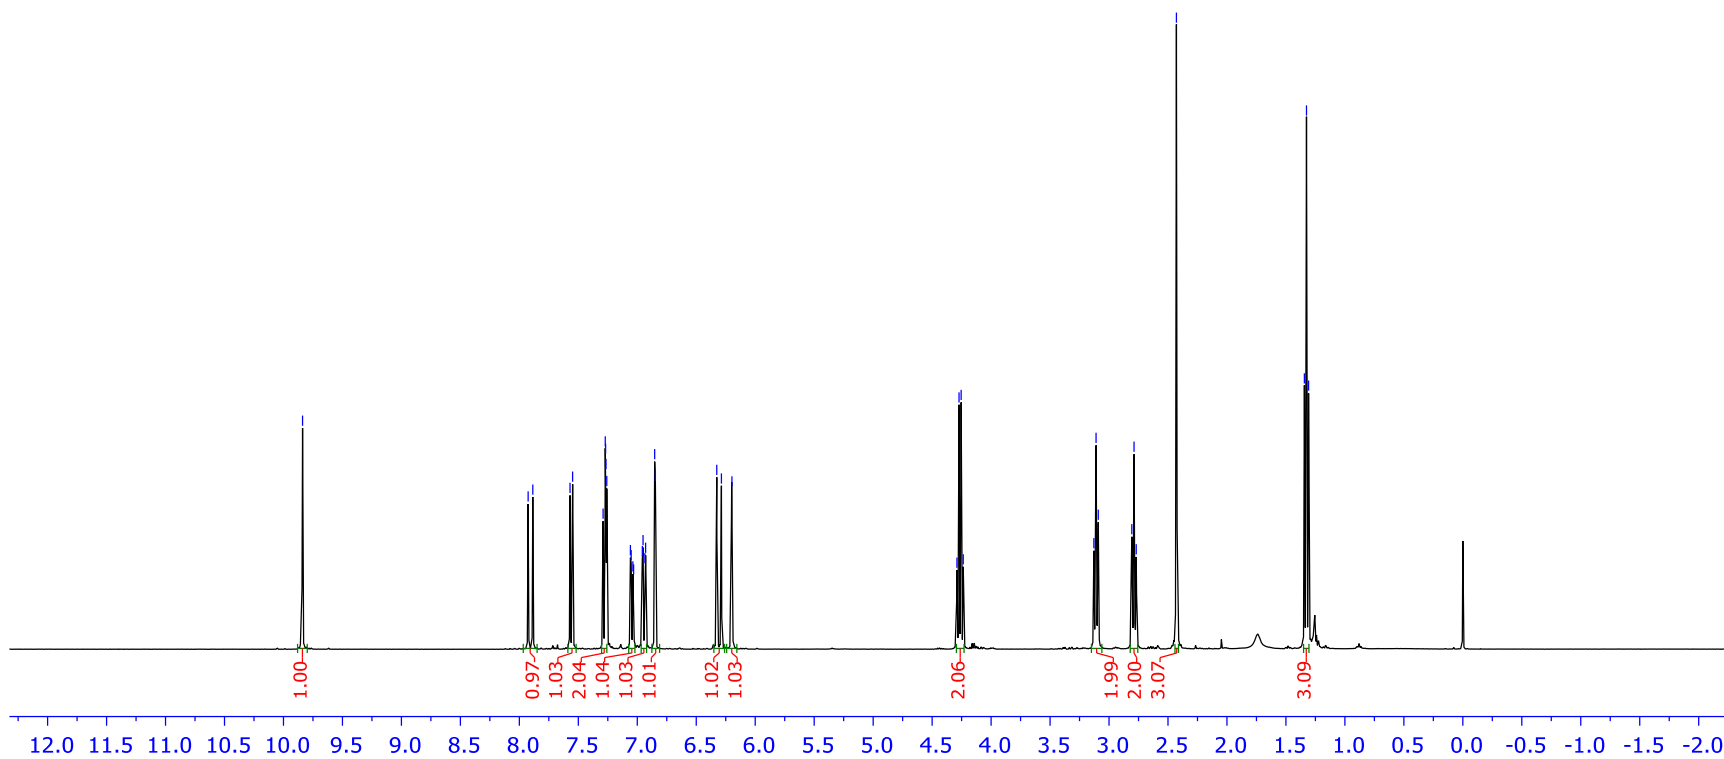

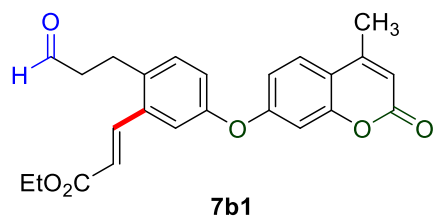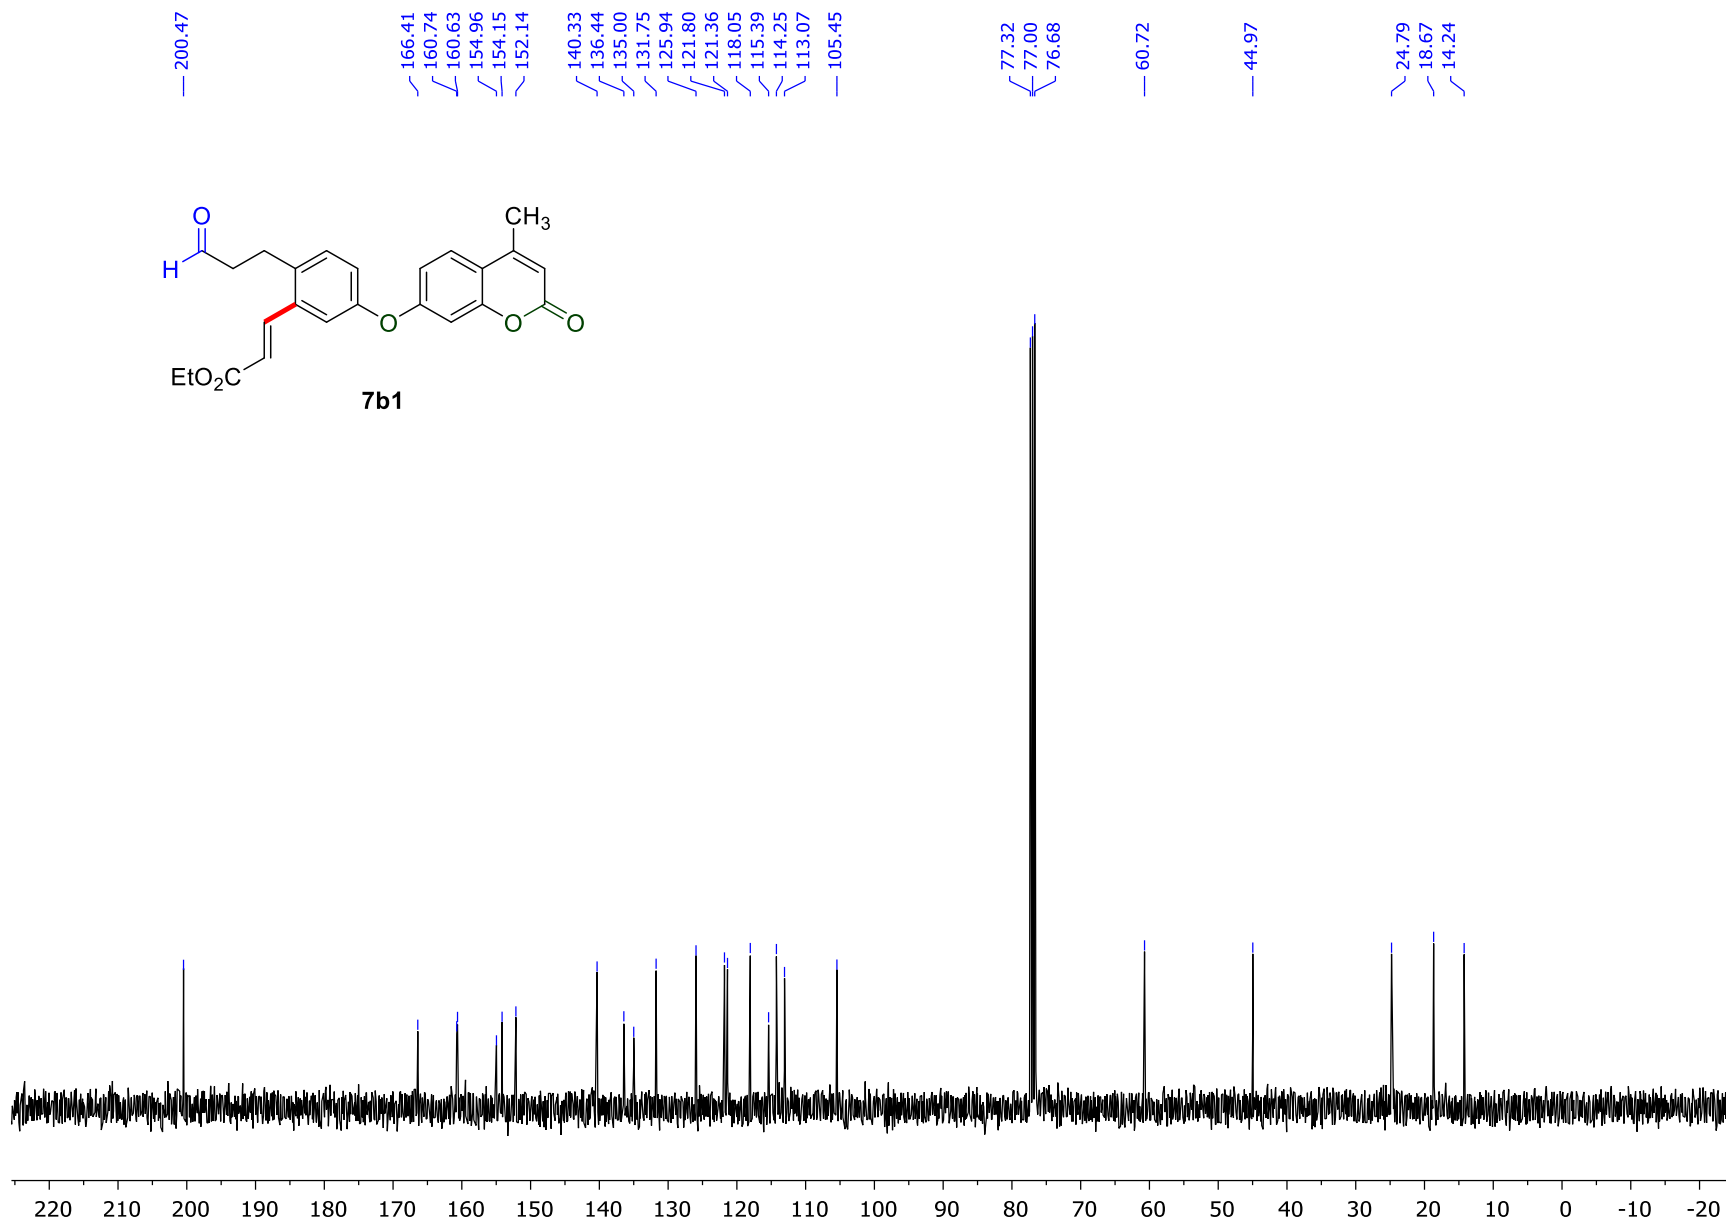

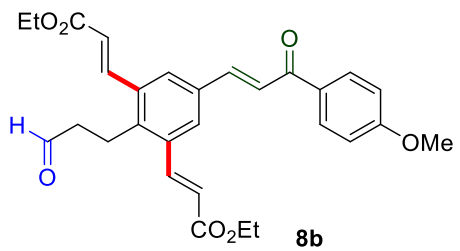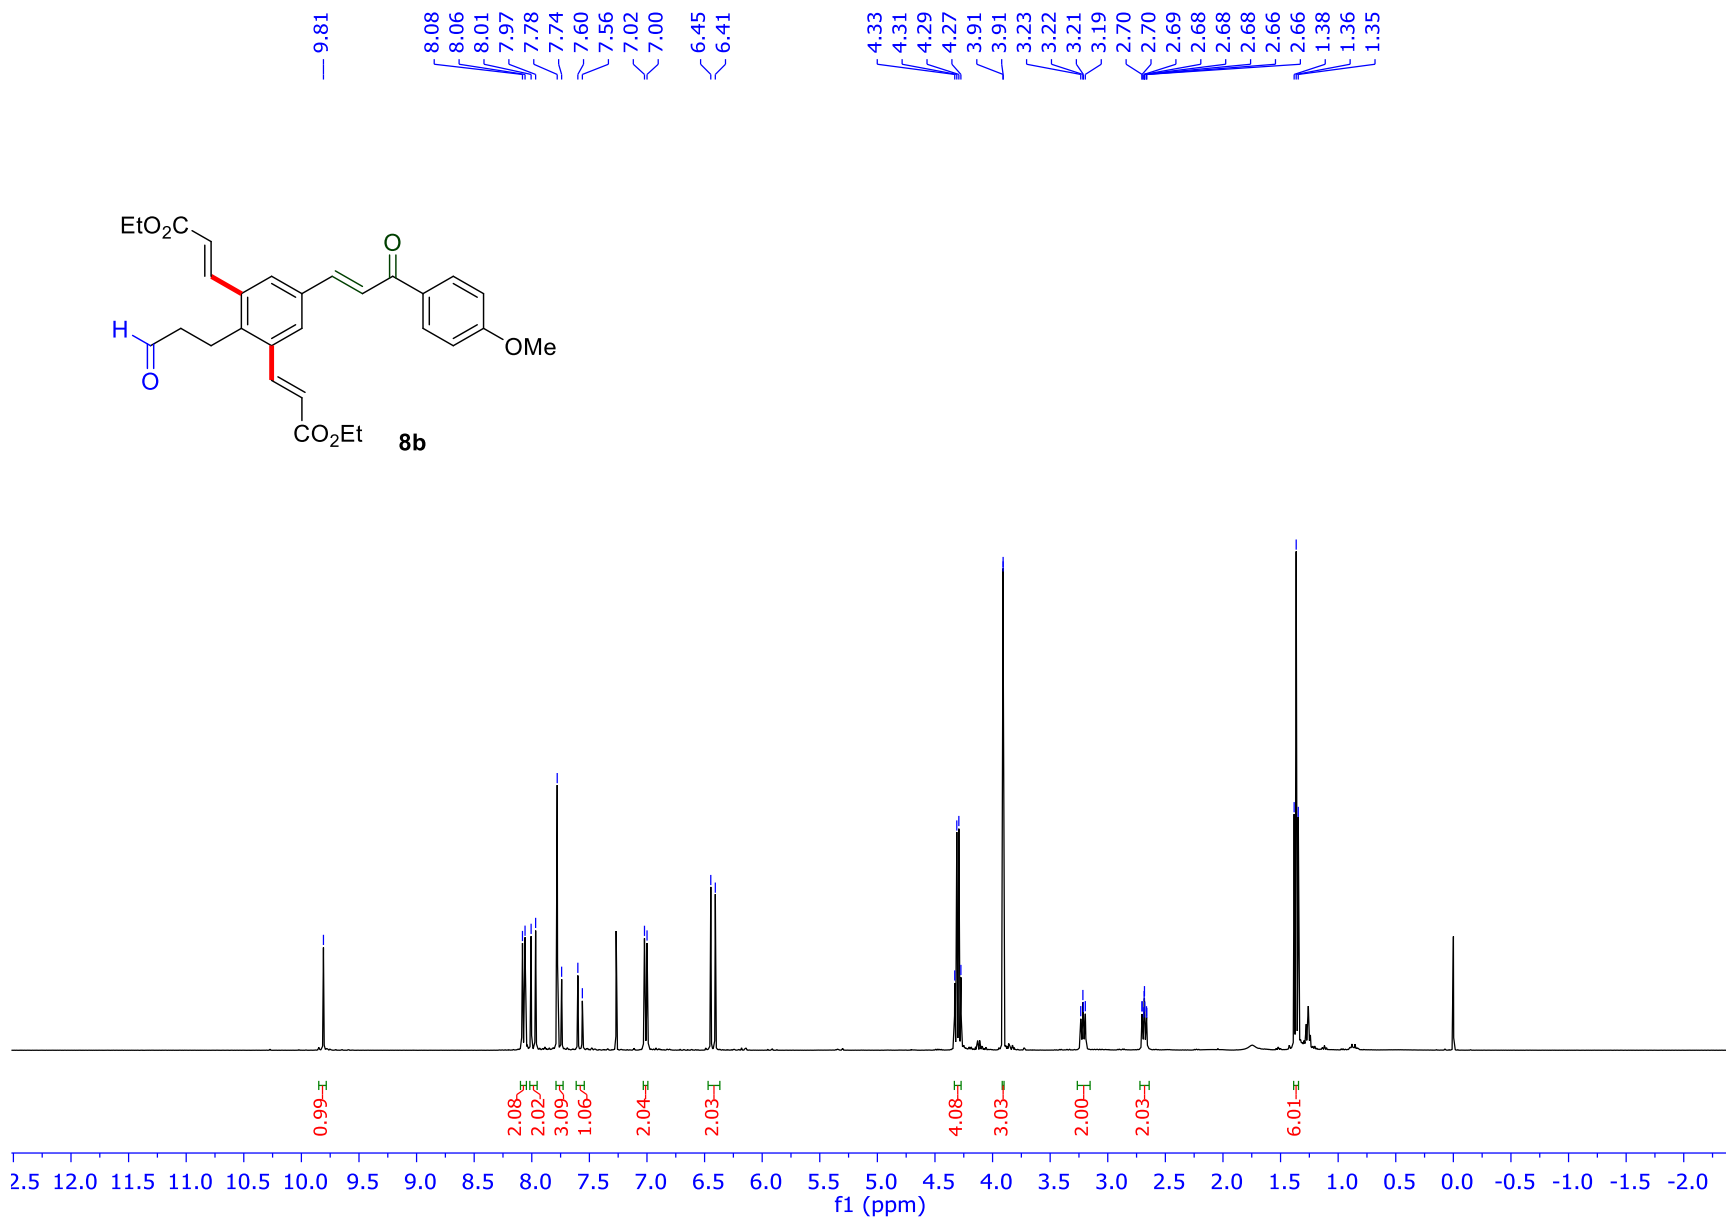

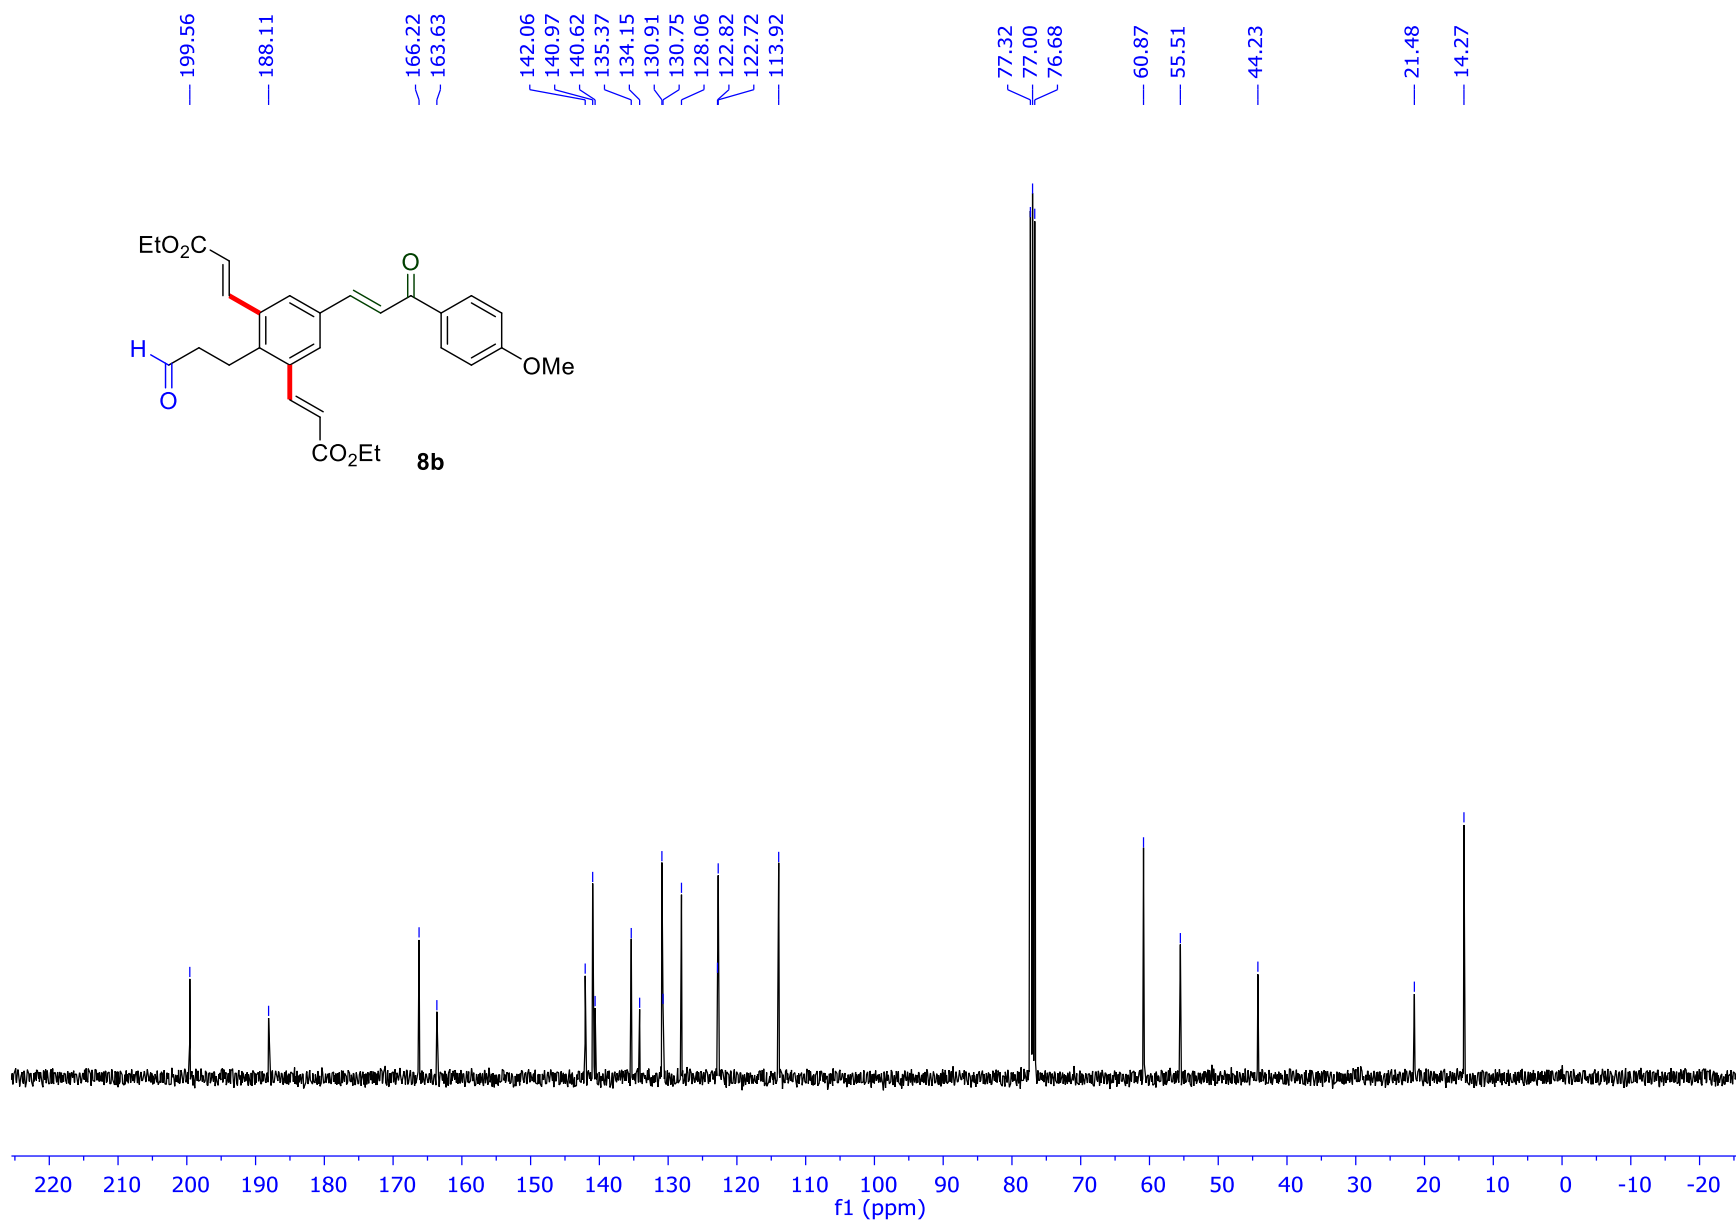

S374

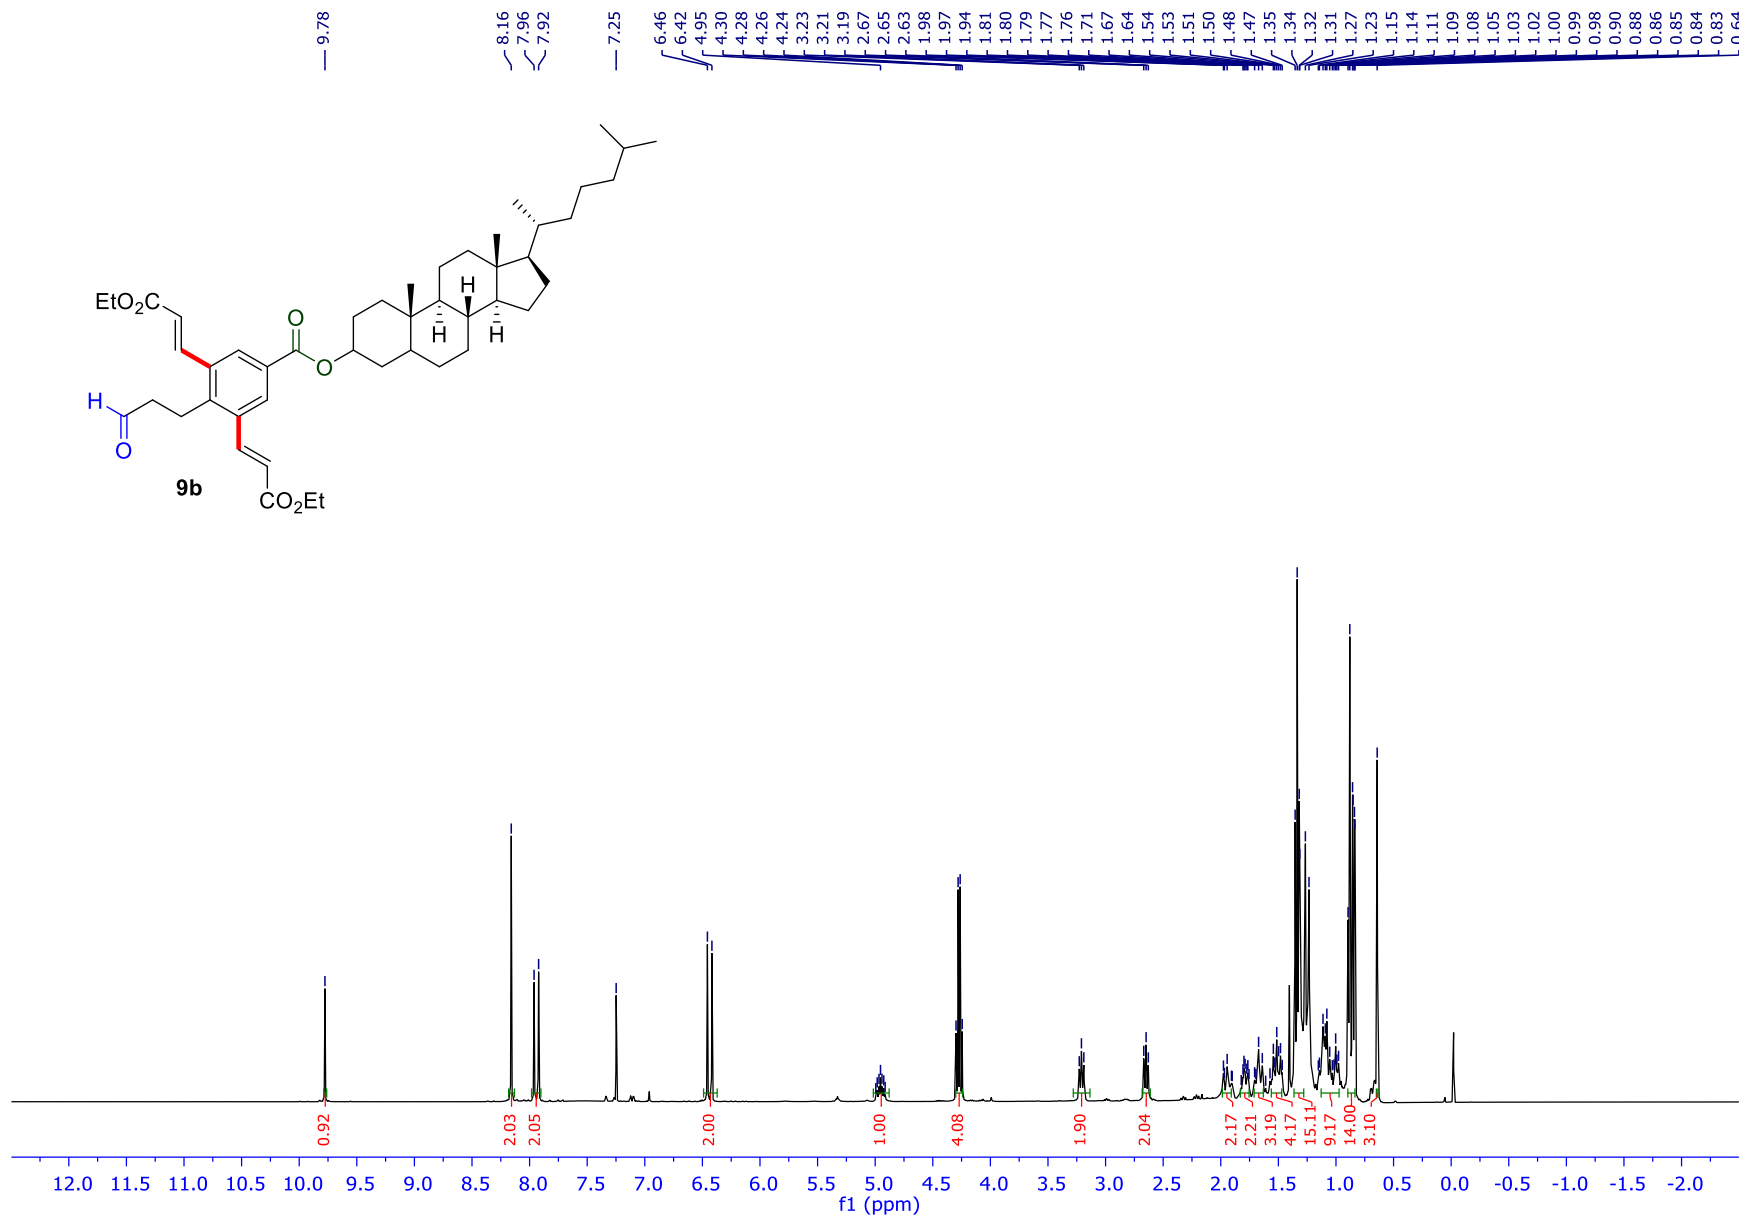

S375

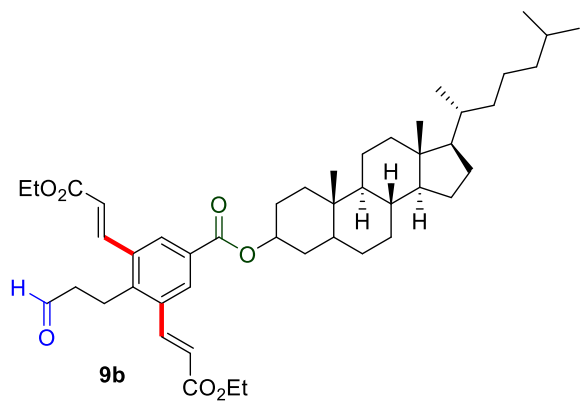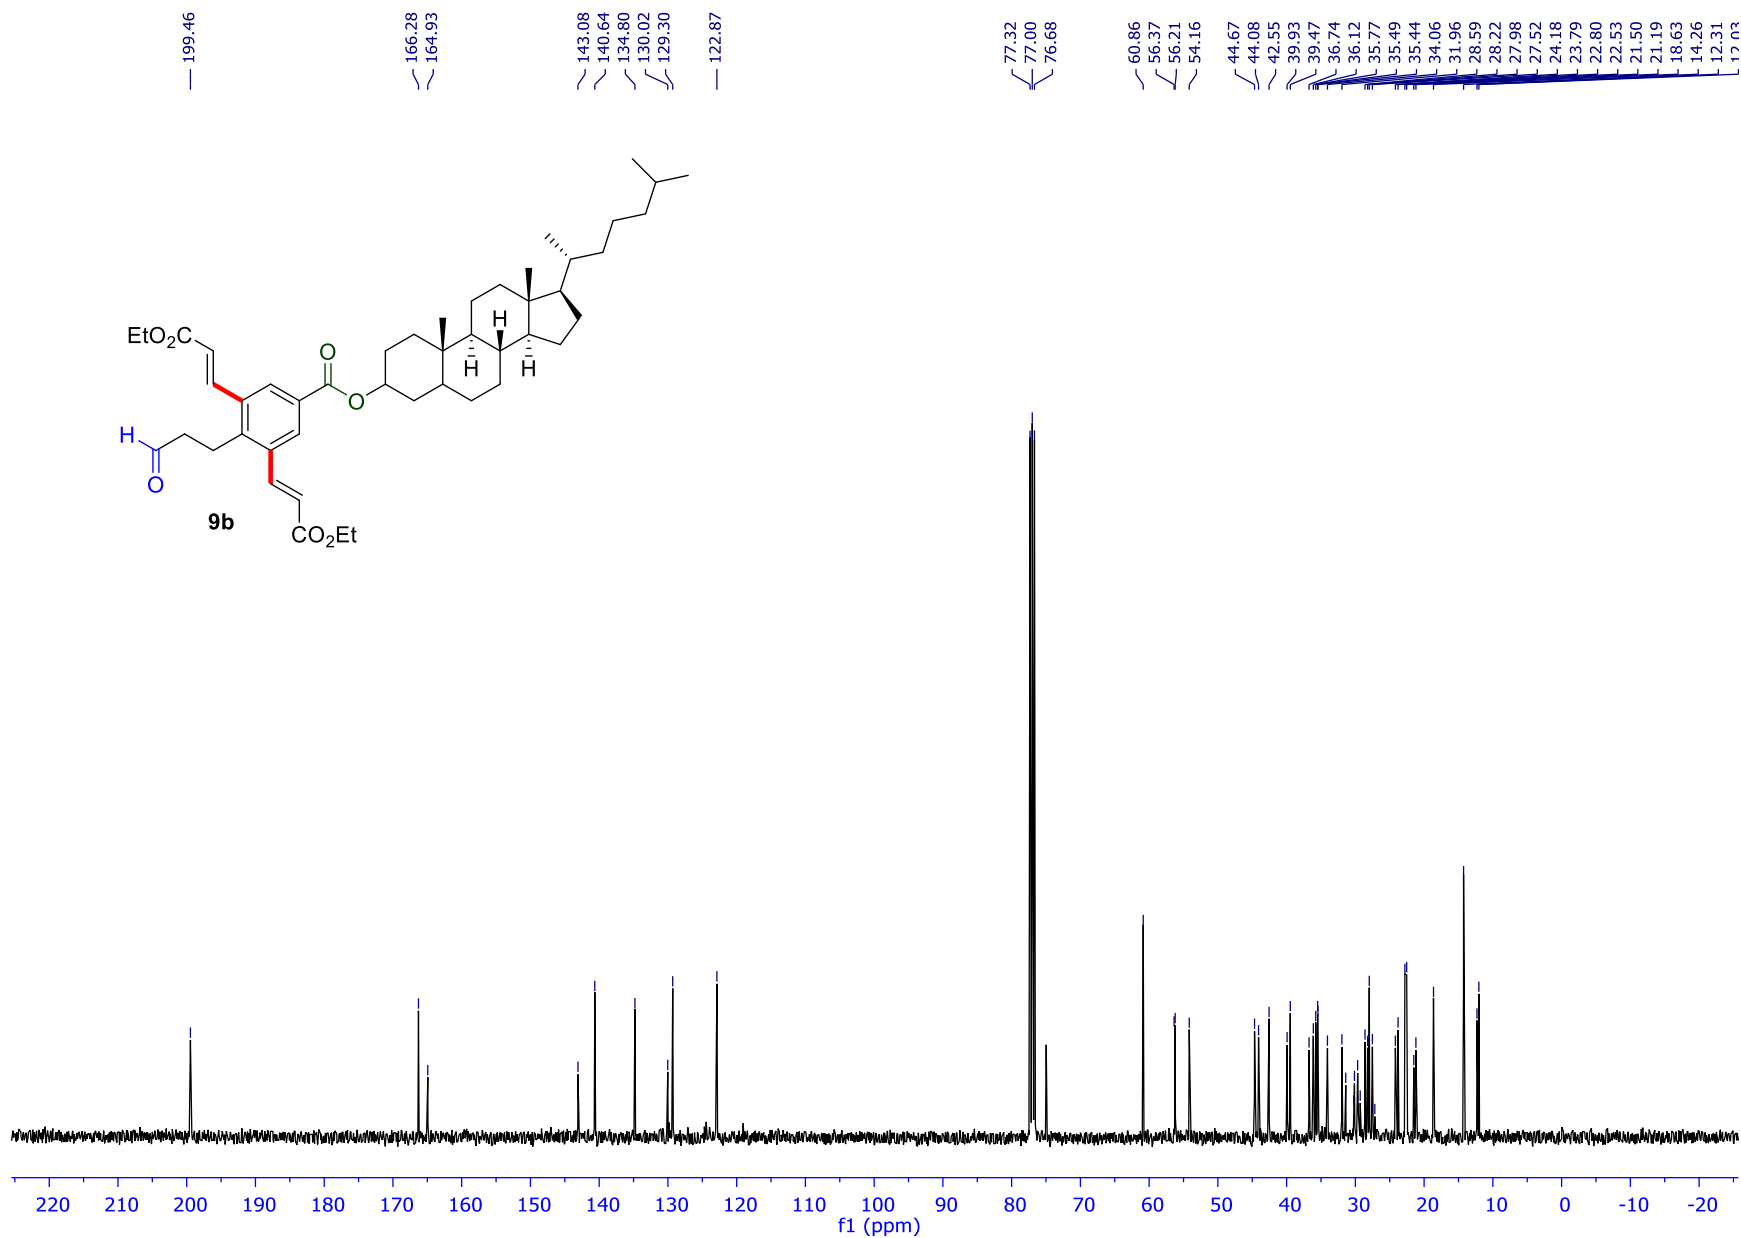



9.806  
8.211  
8.208  
7.971  
7.967  
7.951  
7.912  
7.309  
7.289  
7.273  
6.512  
6.473  
4.318  
4.300  
4.282  
4.265  
3.150  
3.131  
3.112  
2.787  
2.768  
2.749  
1.960  
1.805  
1.692  
1.535  
1.517  
1.508  
1.501  
1.484  
1.377  
1.359  
1.341  
1.324  
1.289  
1.260  
1.253  
1.160  
1.129  
1.117  
1.095  
1.084  
1.072  
1.019  
1.008  
0.998  
0.914  
0.898  
0.883  
0.876  
0.871  
0.859  
0.855  
0.659

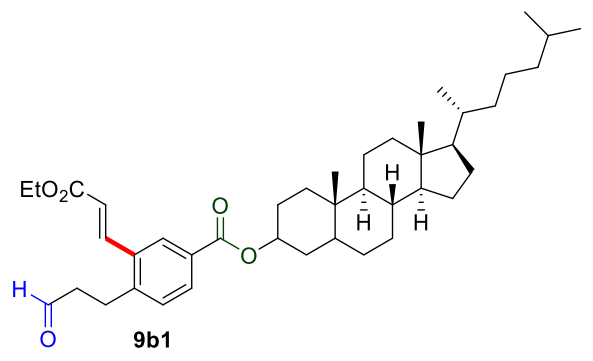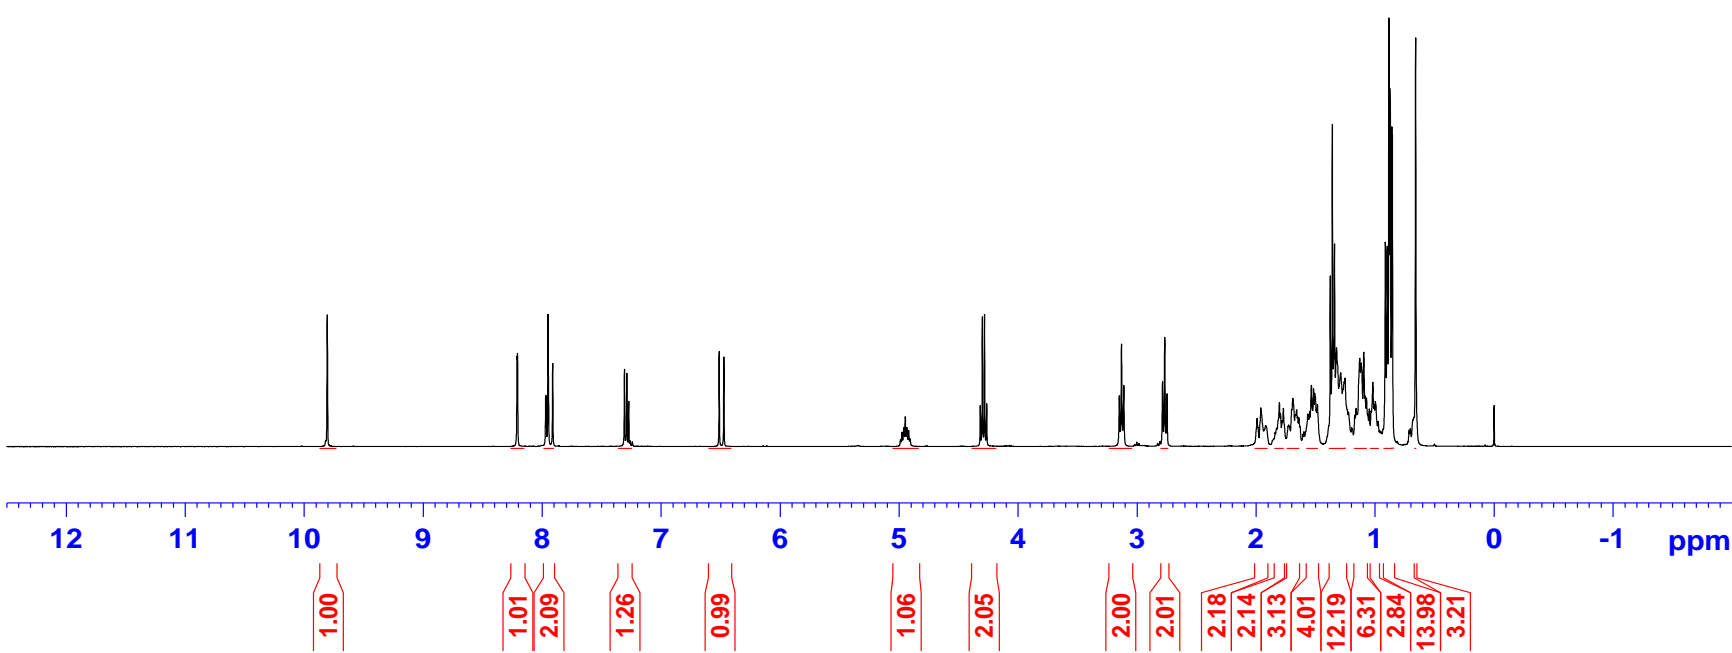

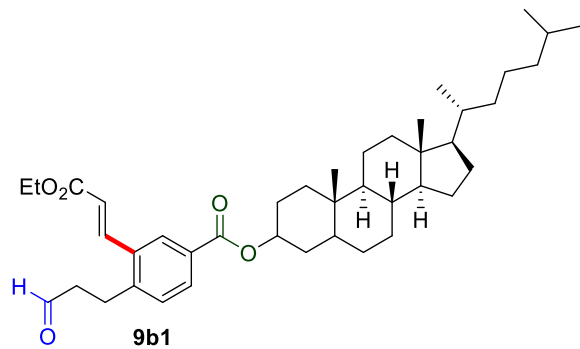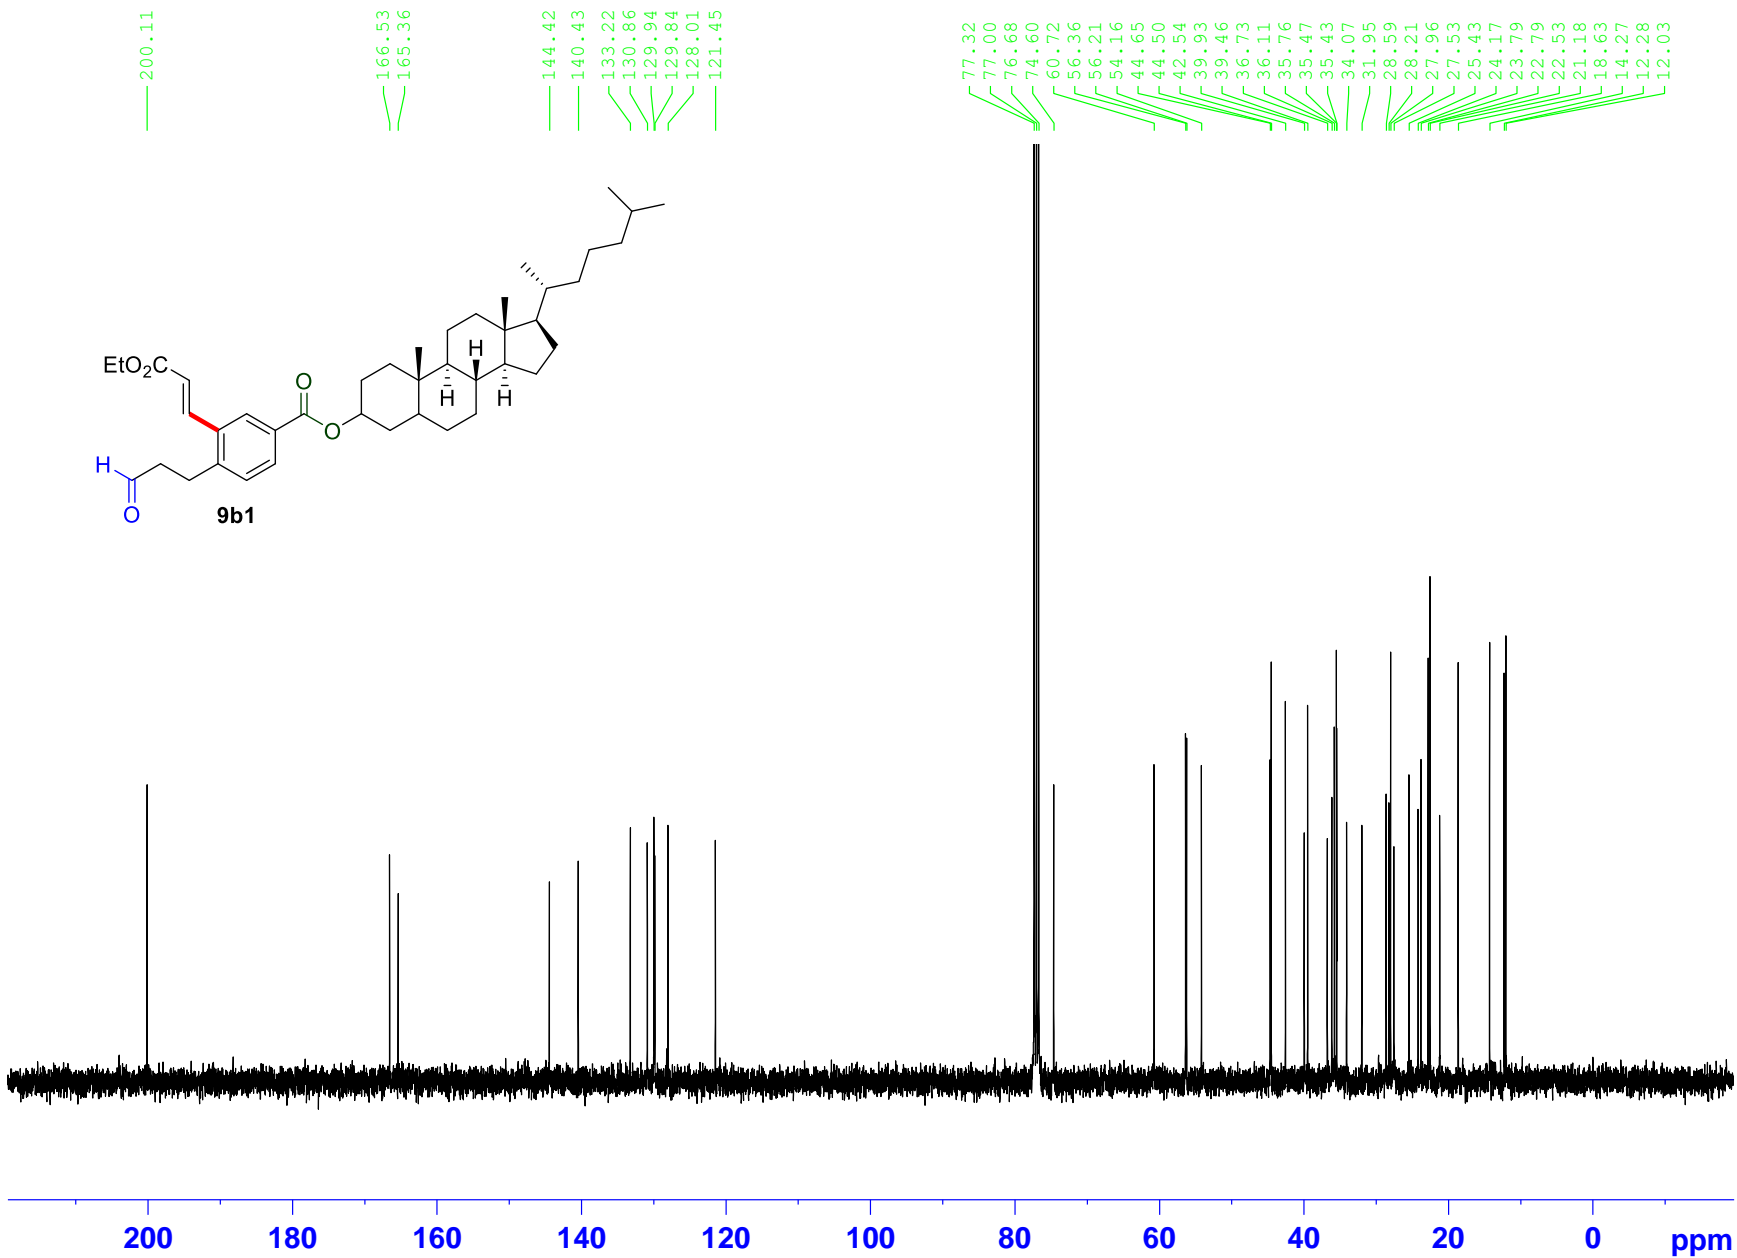

S378

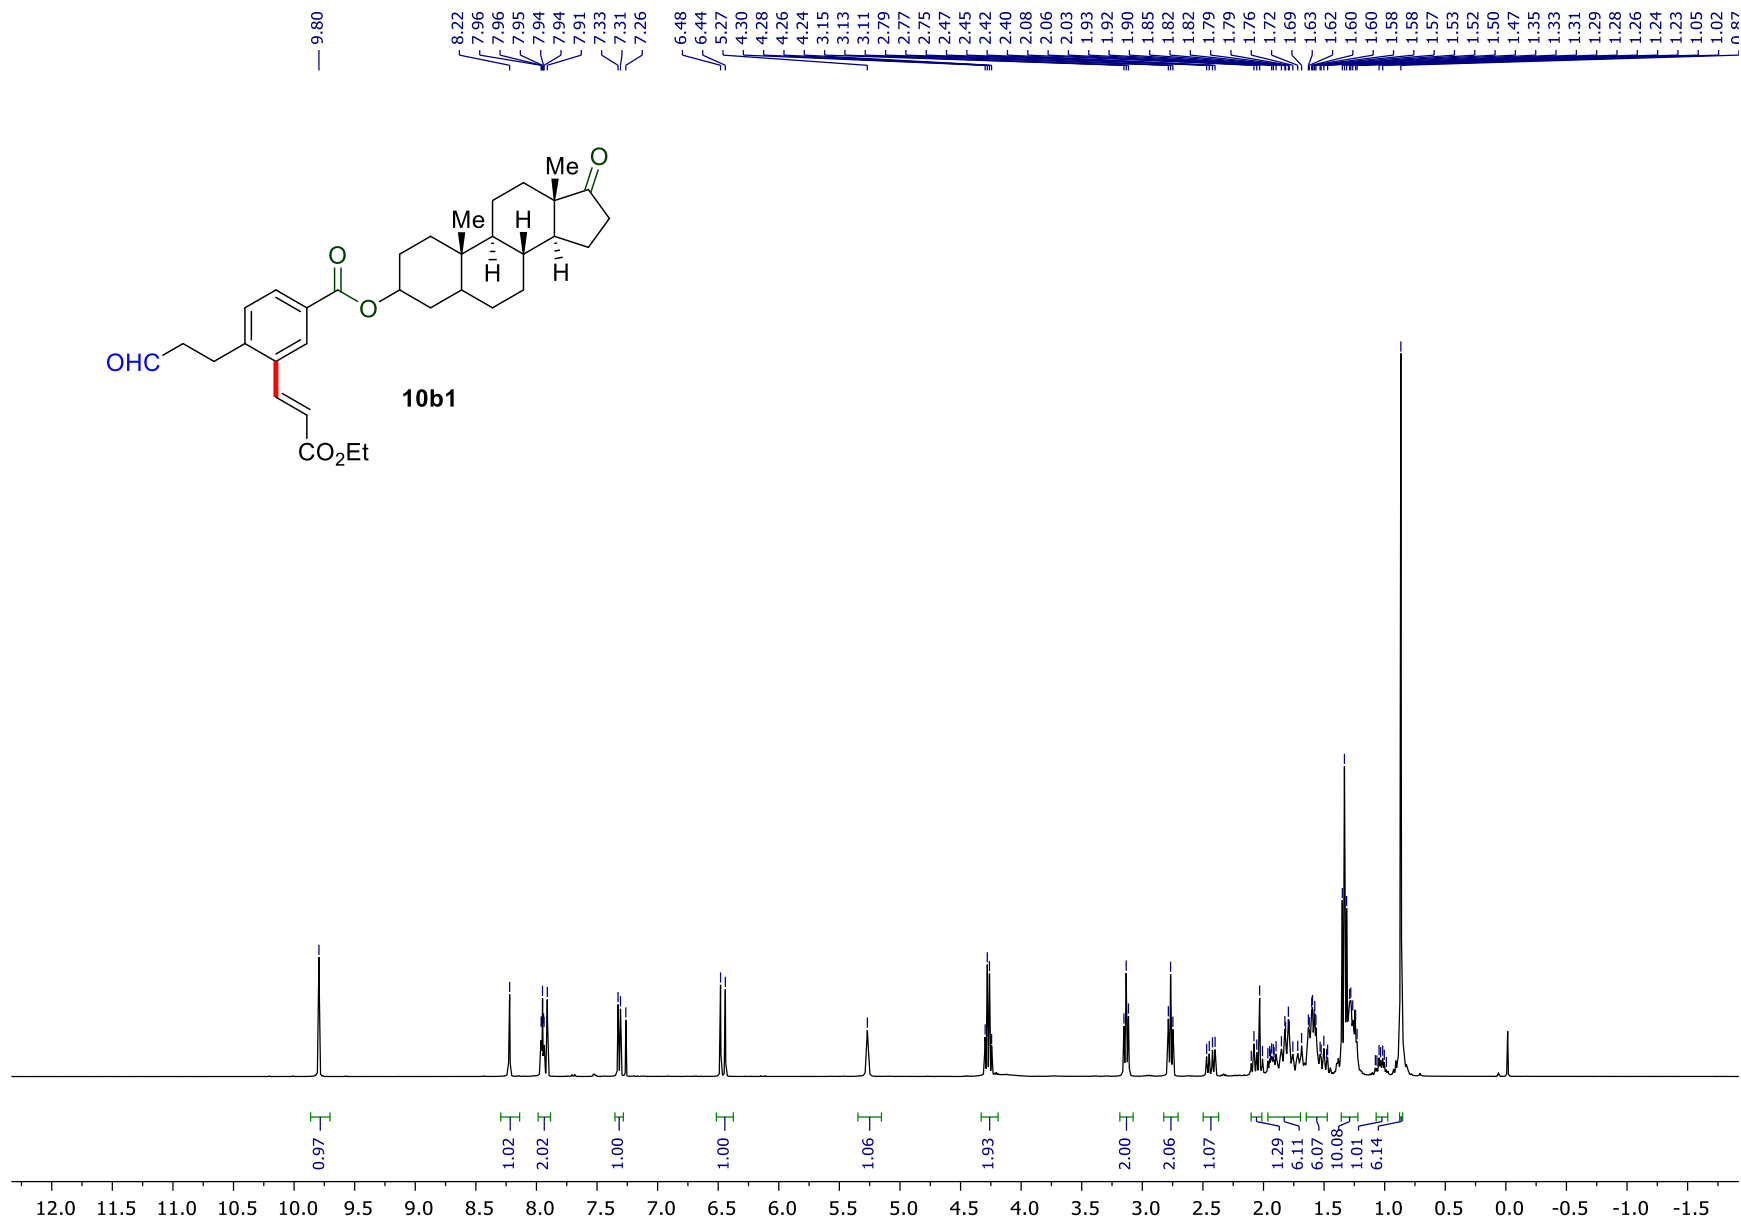

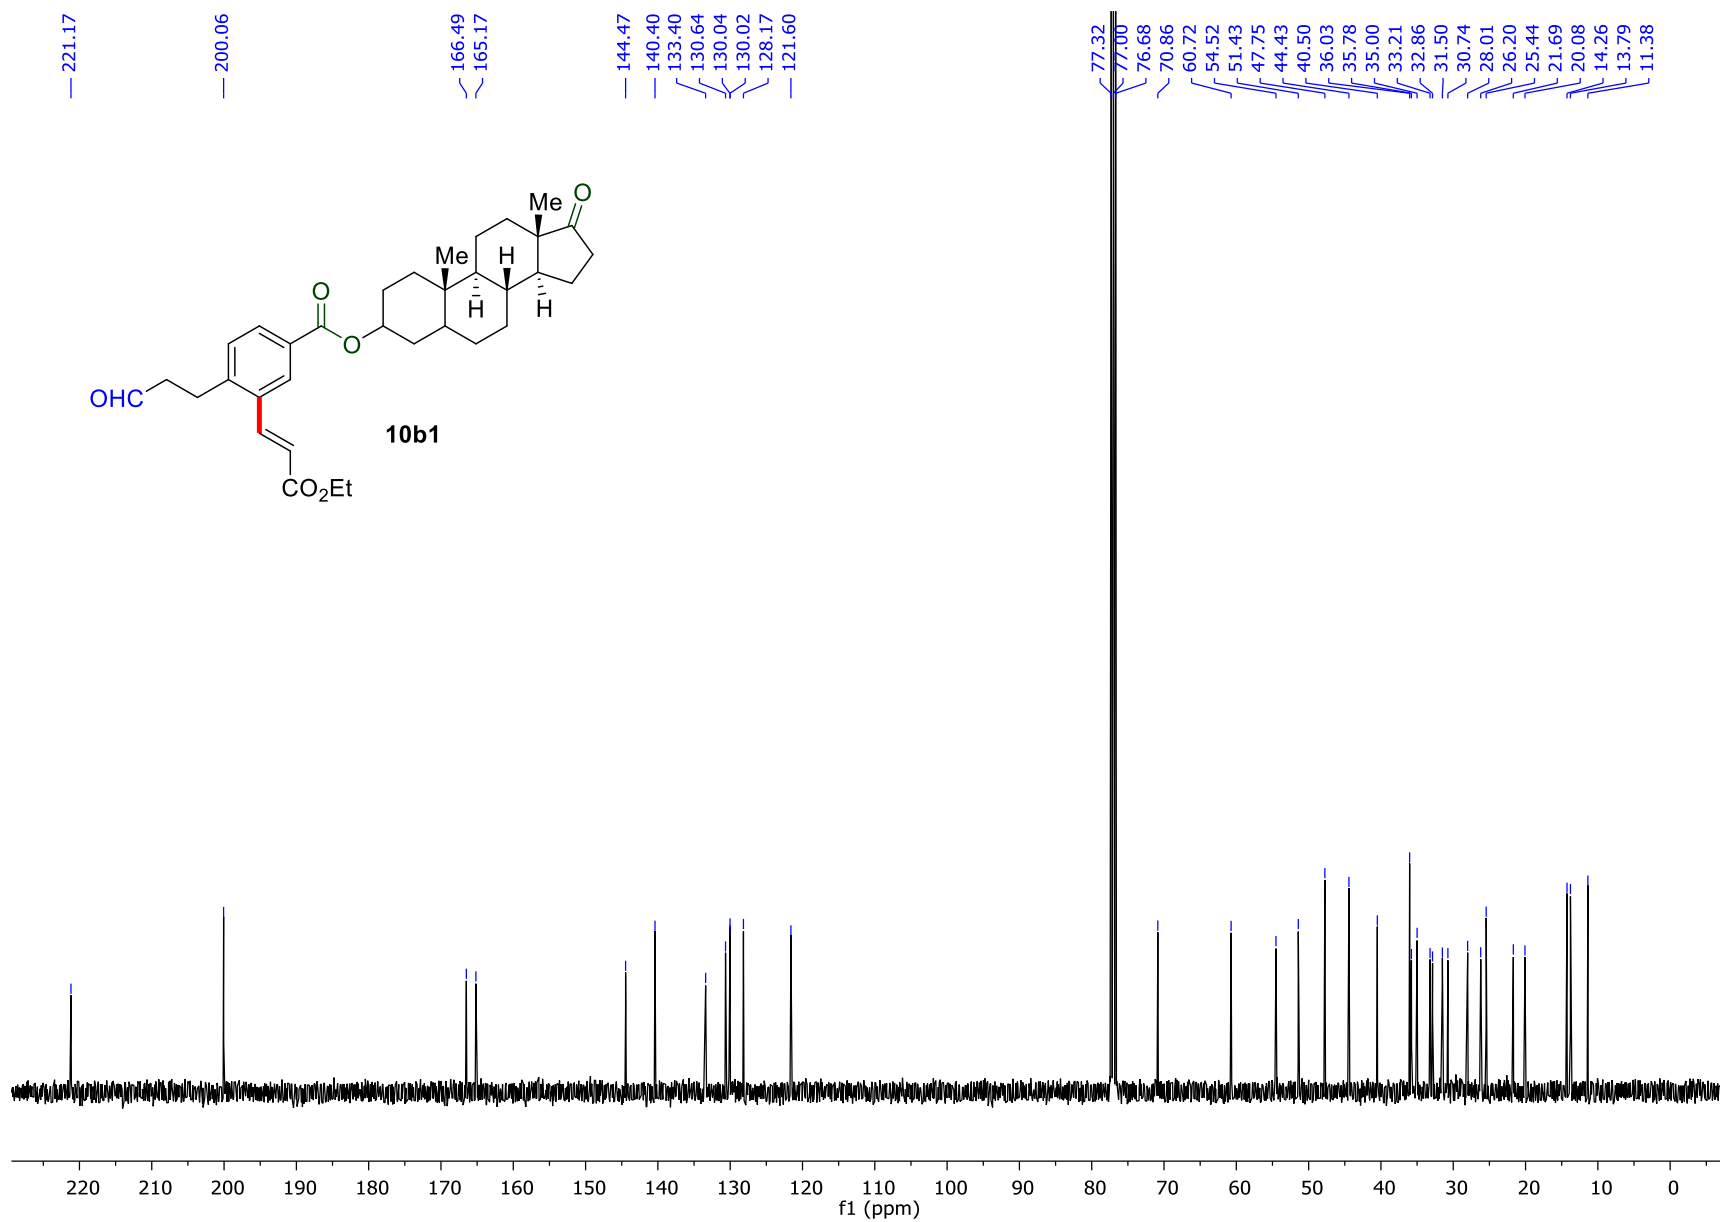

S380

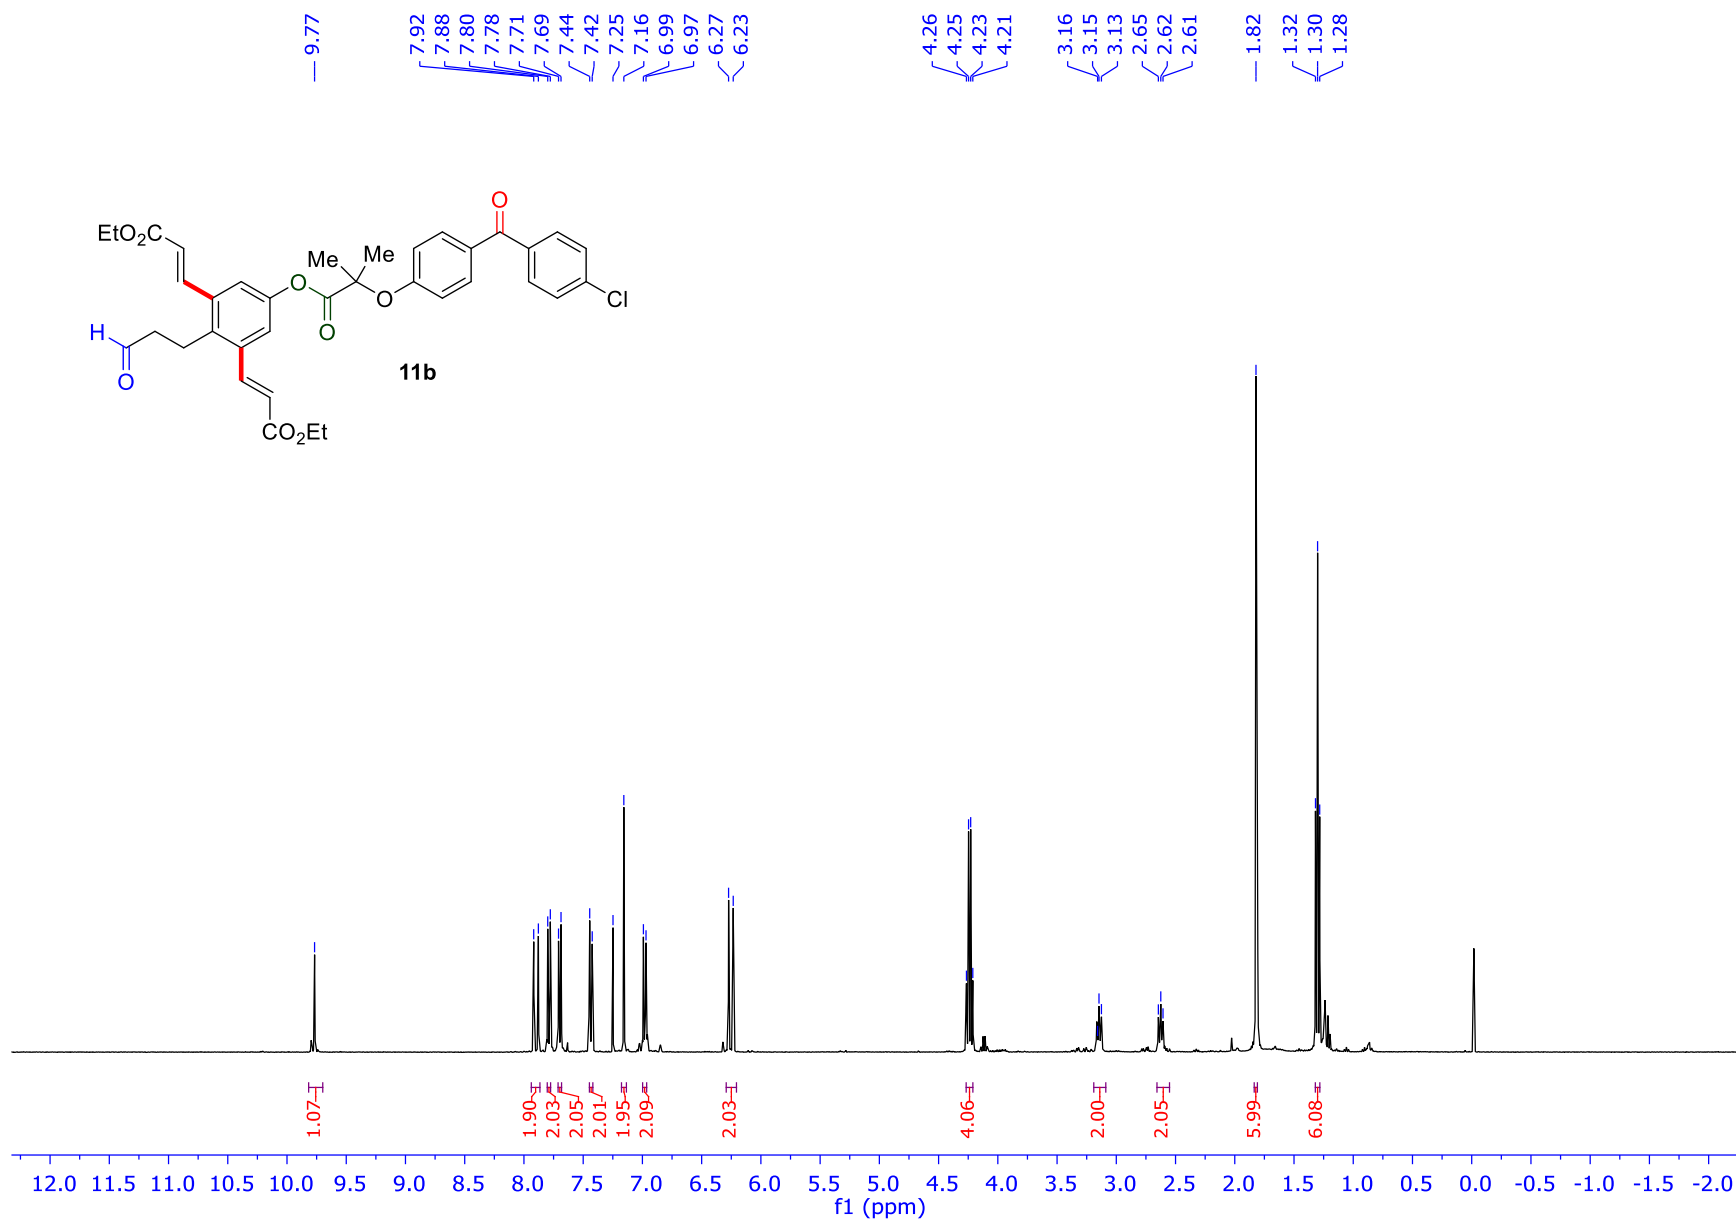

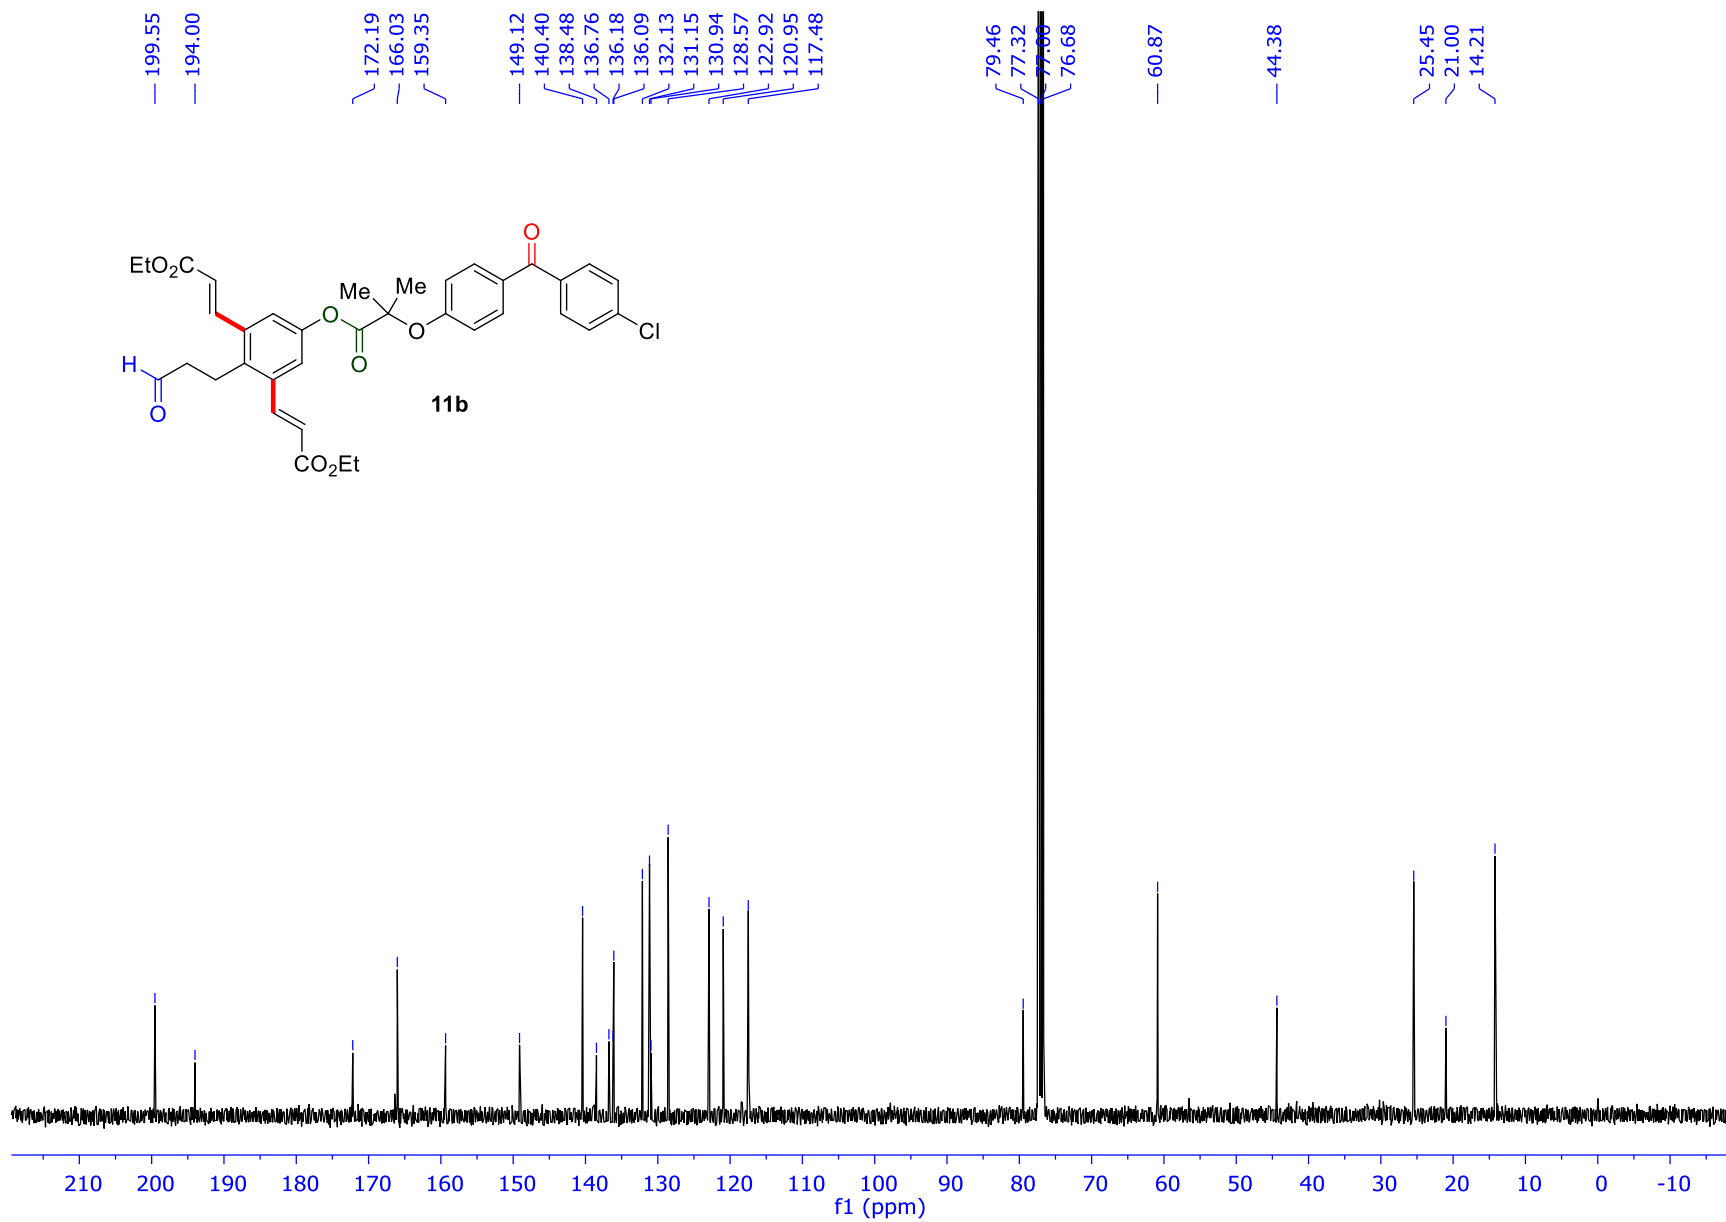

S382

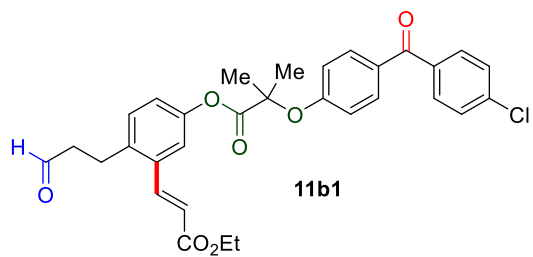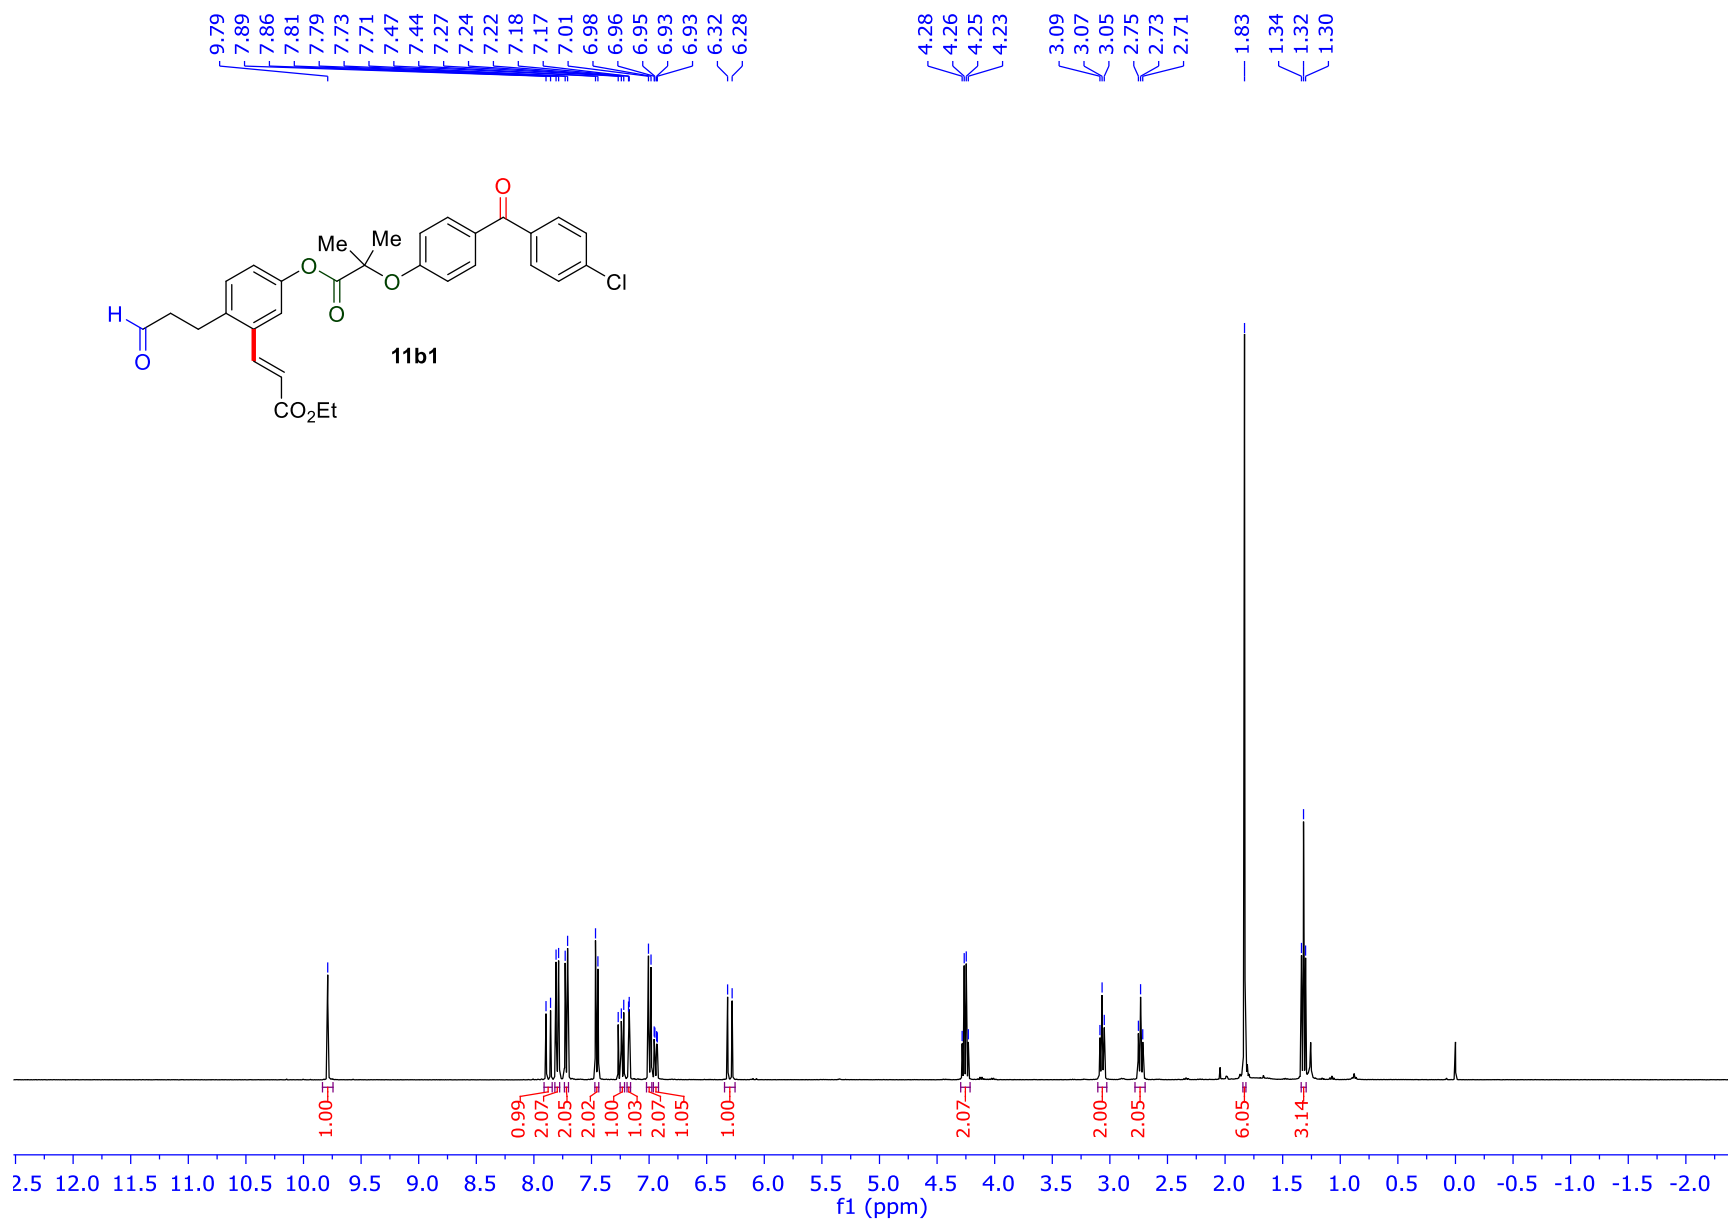

S383

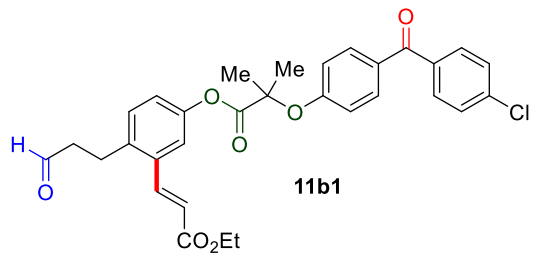

— 200.35  
— 194.09

— 172.32  
— 166.34  
— 159.40

— 149.13  
— 140.23  
— 138.44  
— 137.83  
— 136.19  
— 134.48  
— 132.11  
— 131.14  
— 131.11  
— 130.74  
— 128.54  
— 122.68  
— 121.45  
— 119.21  
— 117.32

— 79.39  
— 77.32  
— 77.00  
— 76.68

— 60.74

— 44.78

— 25.39  
— 24.80

— 14.21

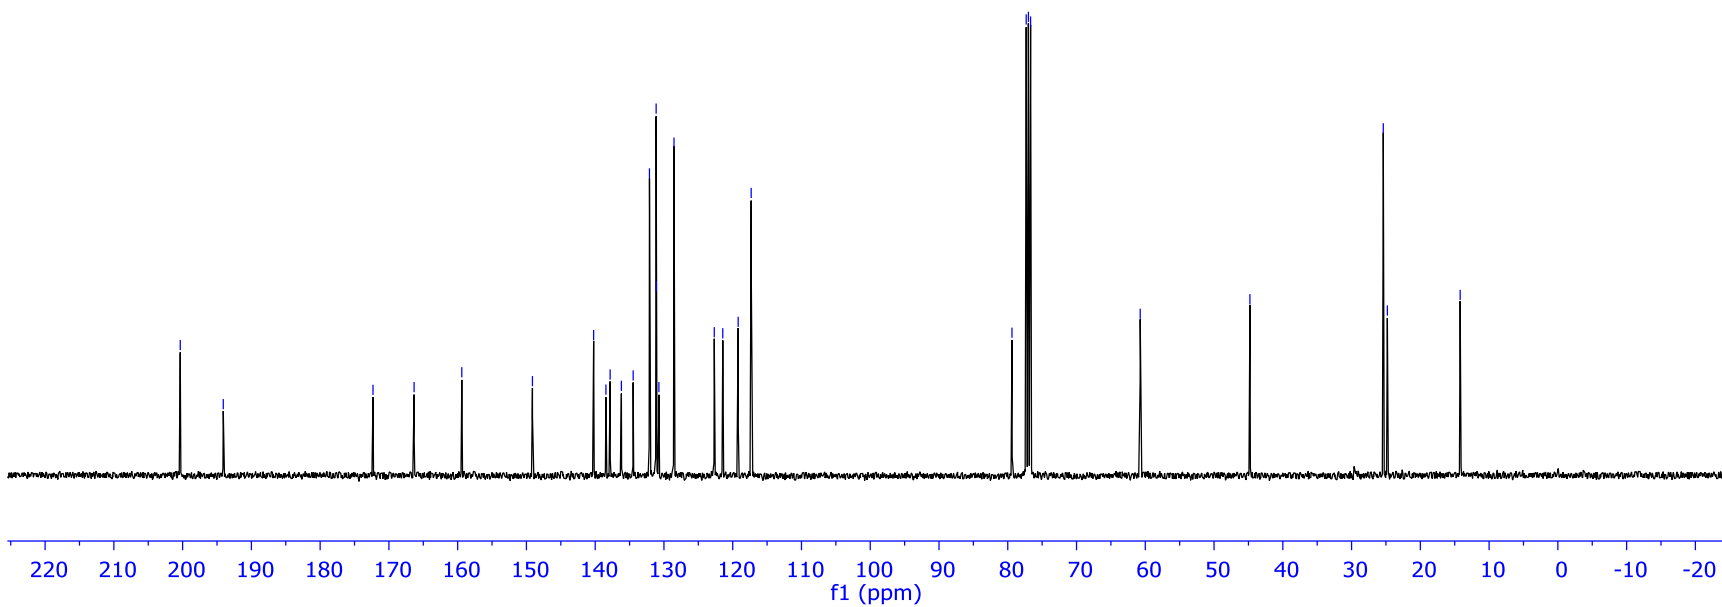

S384



## **Post synthetic product spectra's**

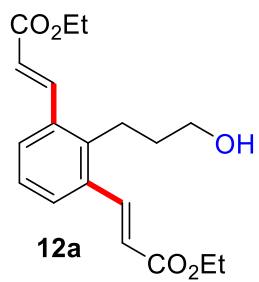

8.113  
 8.073  
 7.579  
 7.559  
 7.287  
 7.274  
 7.254  
 7.235  
 6.370  
 6.330

4.297  
 4.279  
 4.261  
 4.243  
 3.718  
 3.703  
 3.687  
 3.018  
 2.999  
 2.979  
 2.427  
 1.819  
 1.804  
 1.784  
 1.781  
 1.765  
 1.750  
 1.361  
 1.343  
 1.325

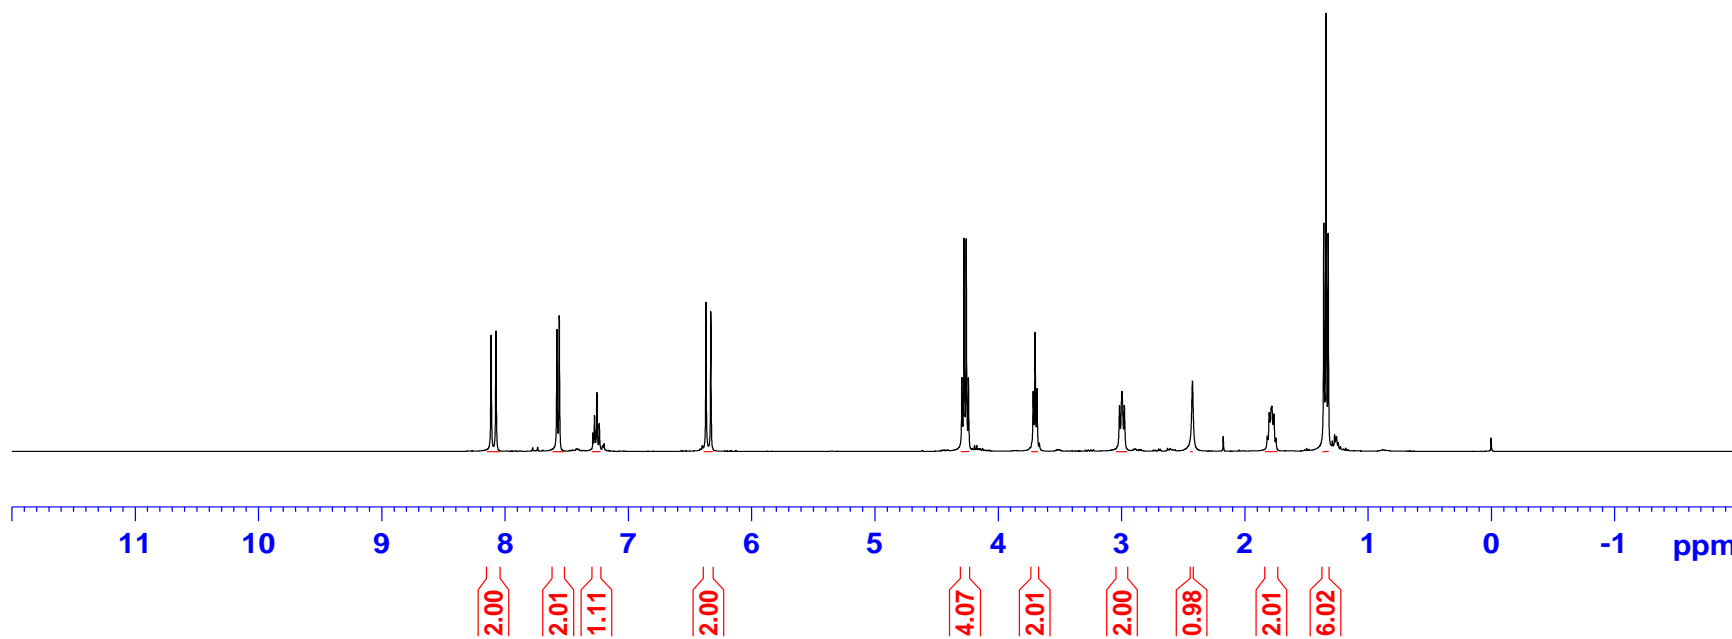

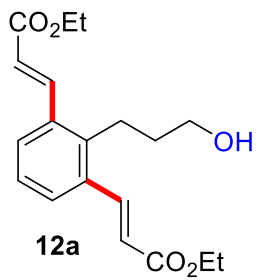

166.79

142.16

140.81

134.32

128.36

126.64

120.87

77.32

77.00

76.68

61.64

60.60

33.98

25.08

14.20

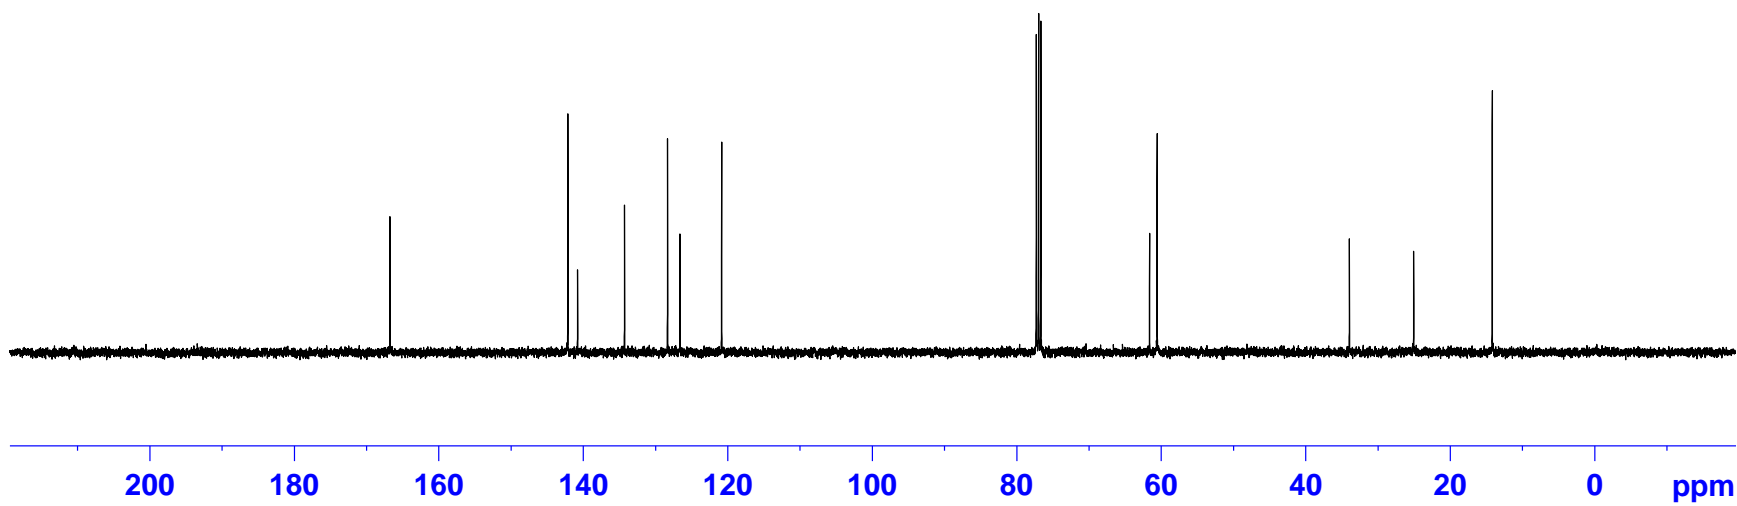

S387

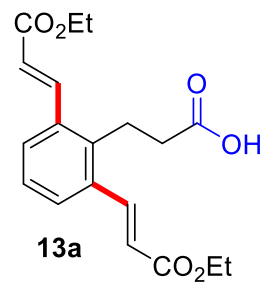

— 9.979

8.100  
 8.060  
 7.580  
 7.561  
 7.305  
 7.286  
 7.266  
 6.380  
 6.341

4.311  
 4.293  
 4.275  
 4.257  
 3.258  
 3.238  
 3.218  
 2.560  
 2.540  
 2.521

1.365  
 1.347  
 1.329

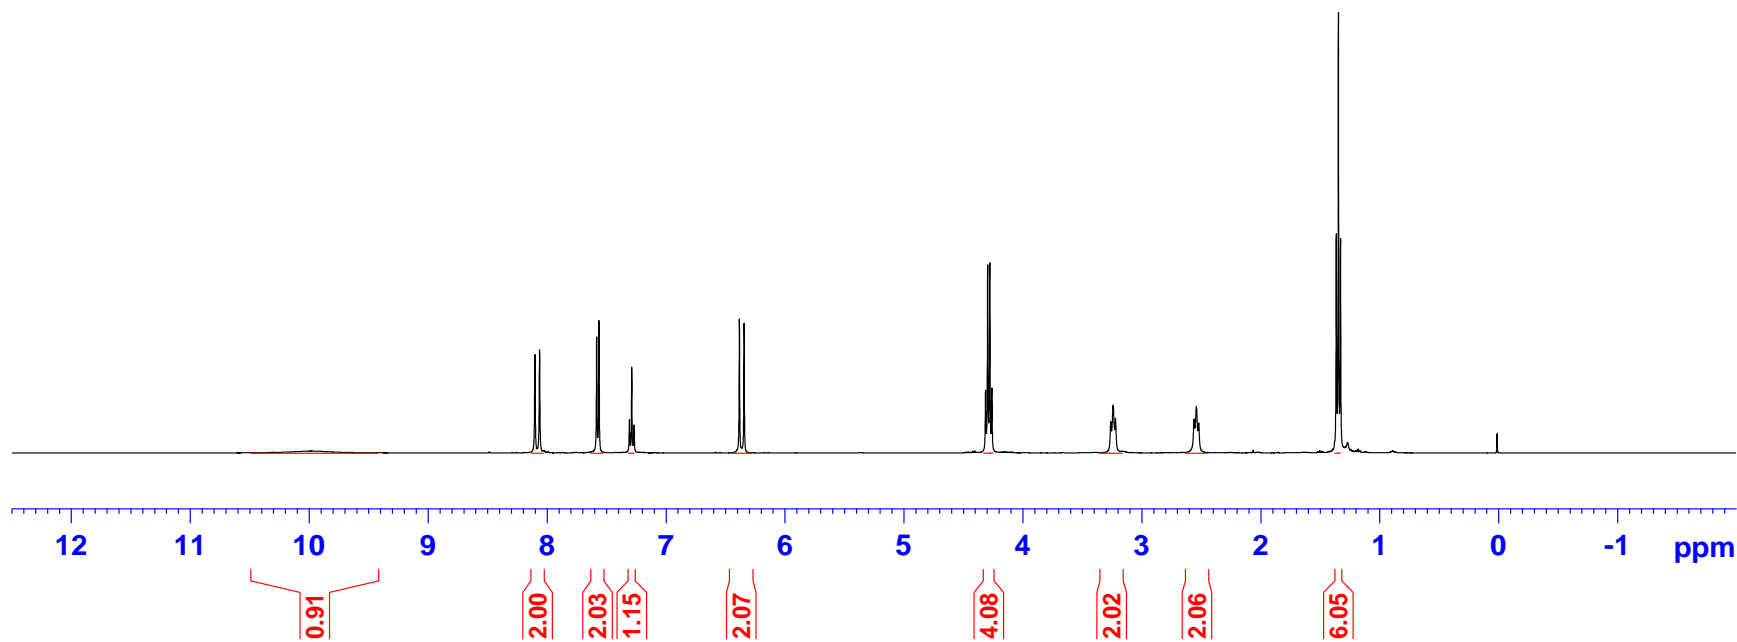

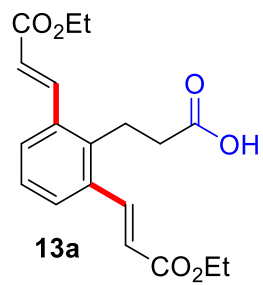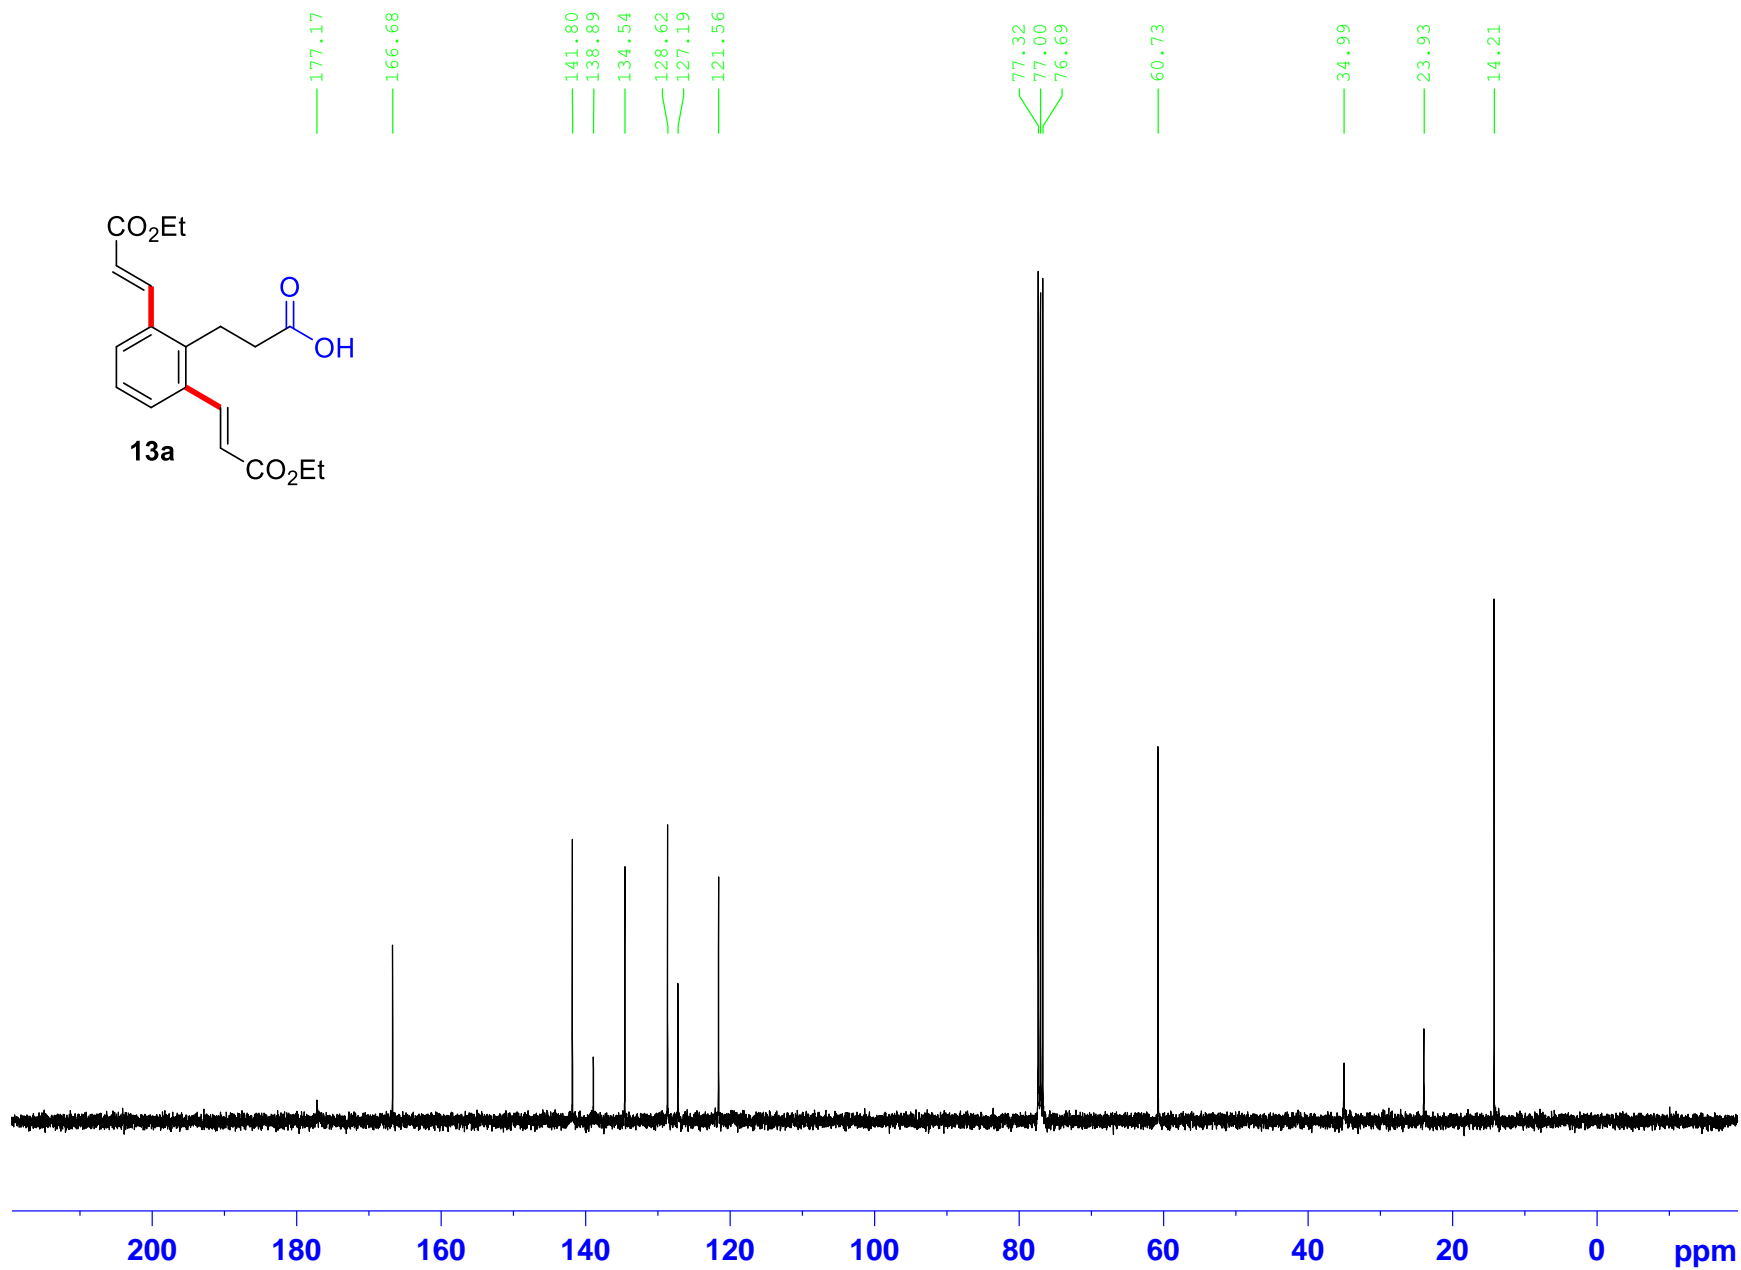

S389

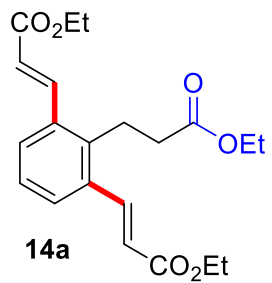

8.056  
8.016  
7.569  
7.550  
7.296  
7.277  
7.269  
7.257  
6.370  
6.331  
4.308  
4.290  
4.272  
4.255  
4.170  
4.152  
4.134  
4.116  
3.236  
3.216  
3.195  
2.505  
2.484  
2.464  
1.366  
1.349  
1.331  
1.277  
1.259  
1.241

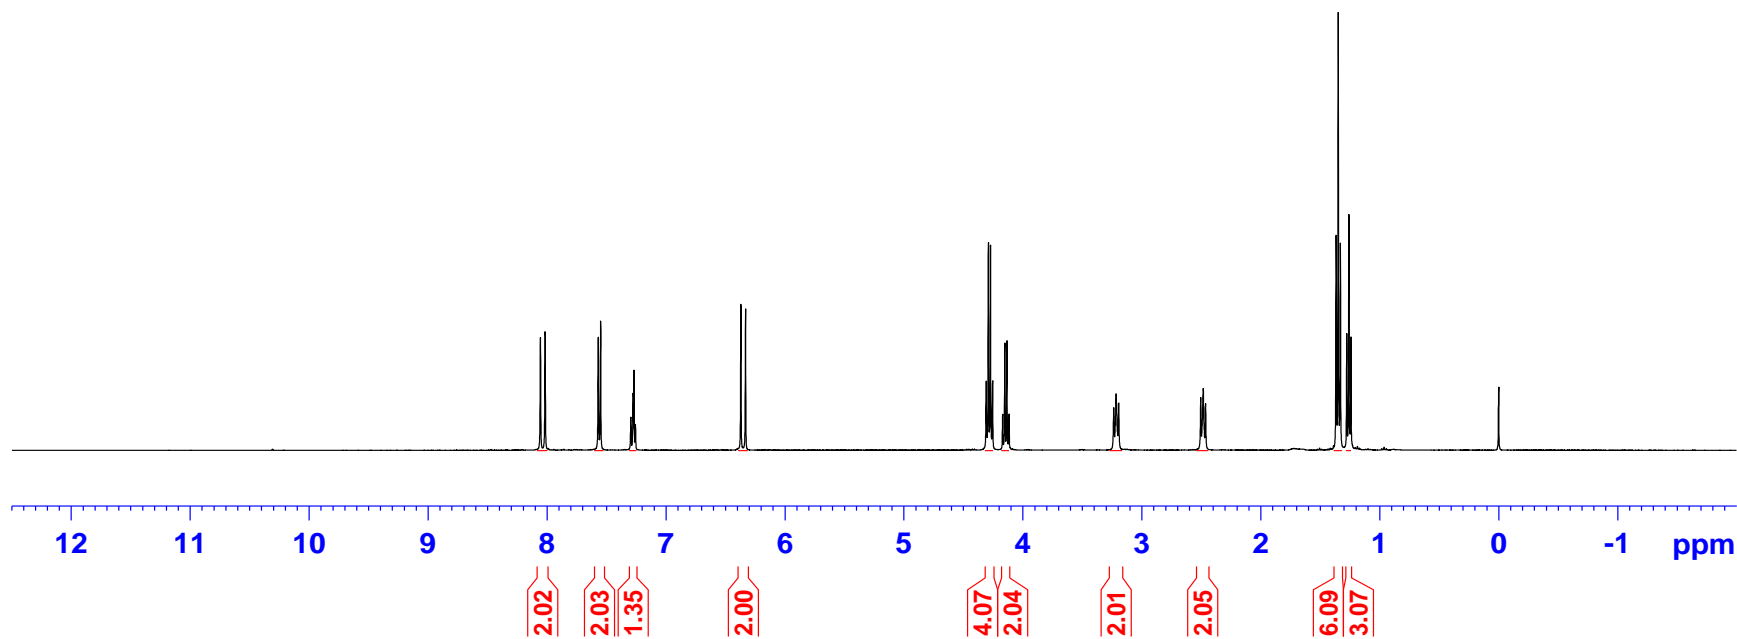

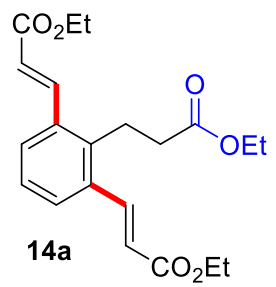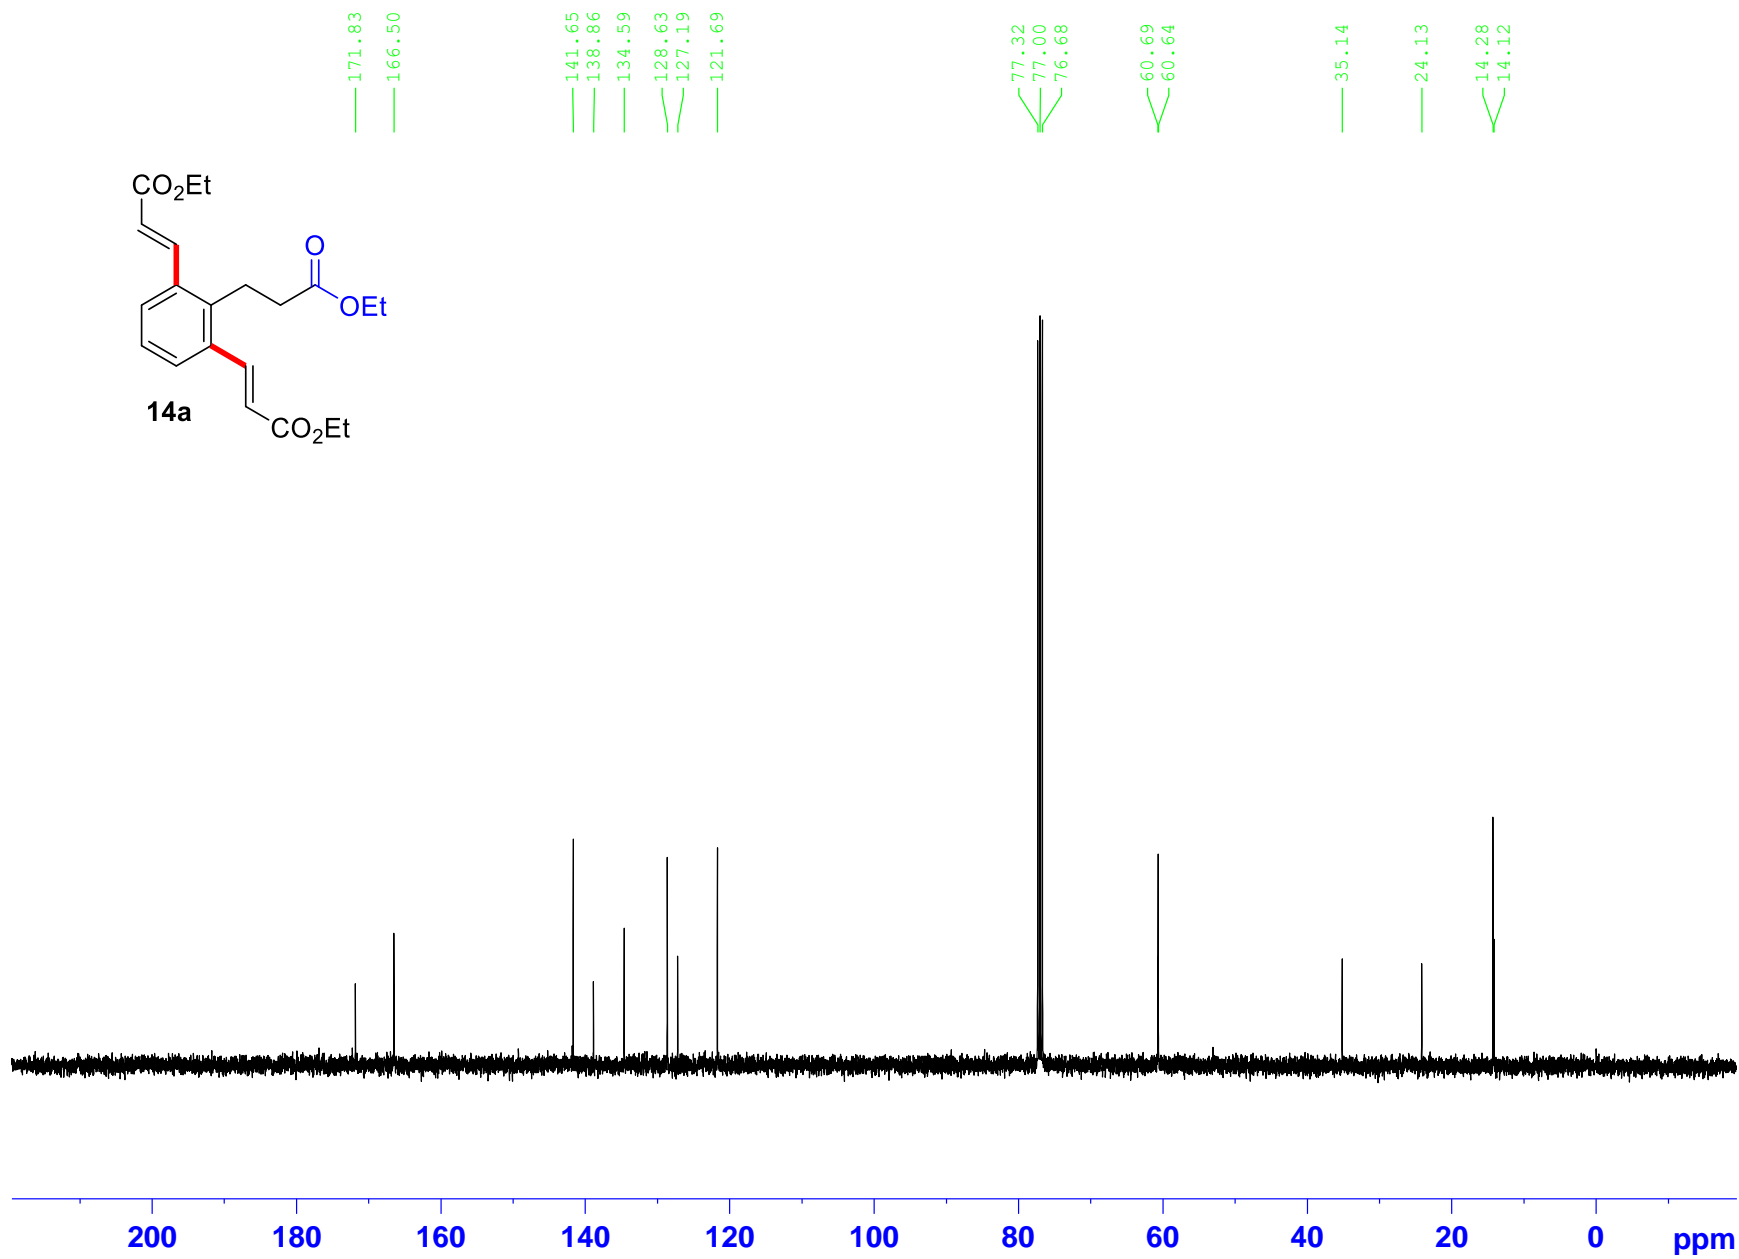

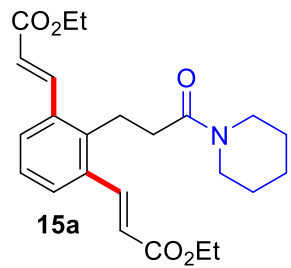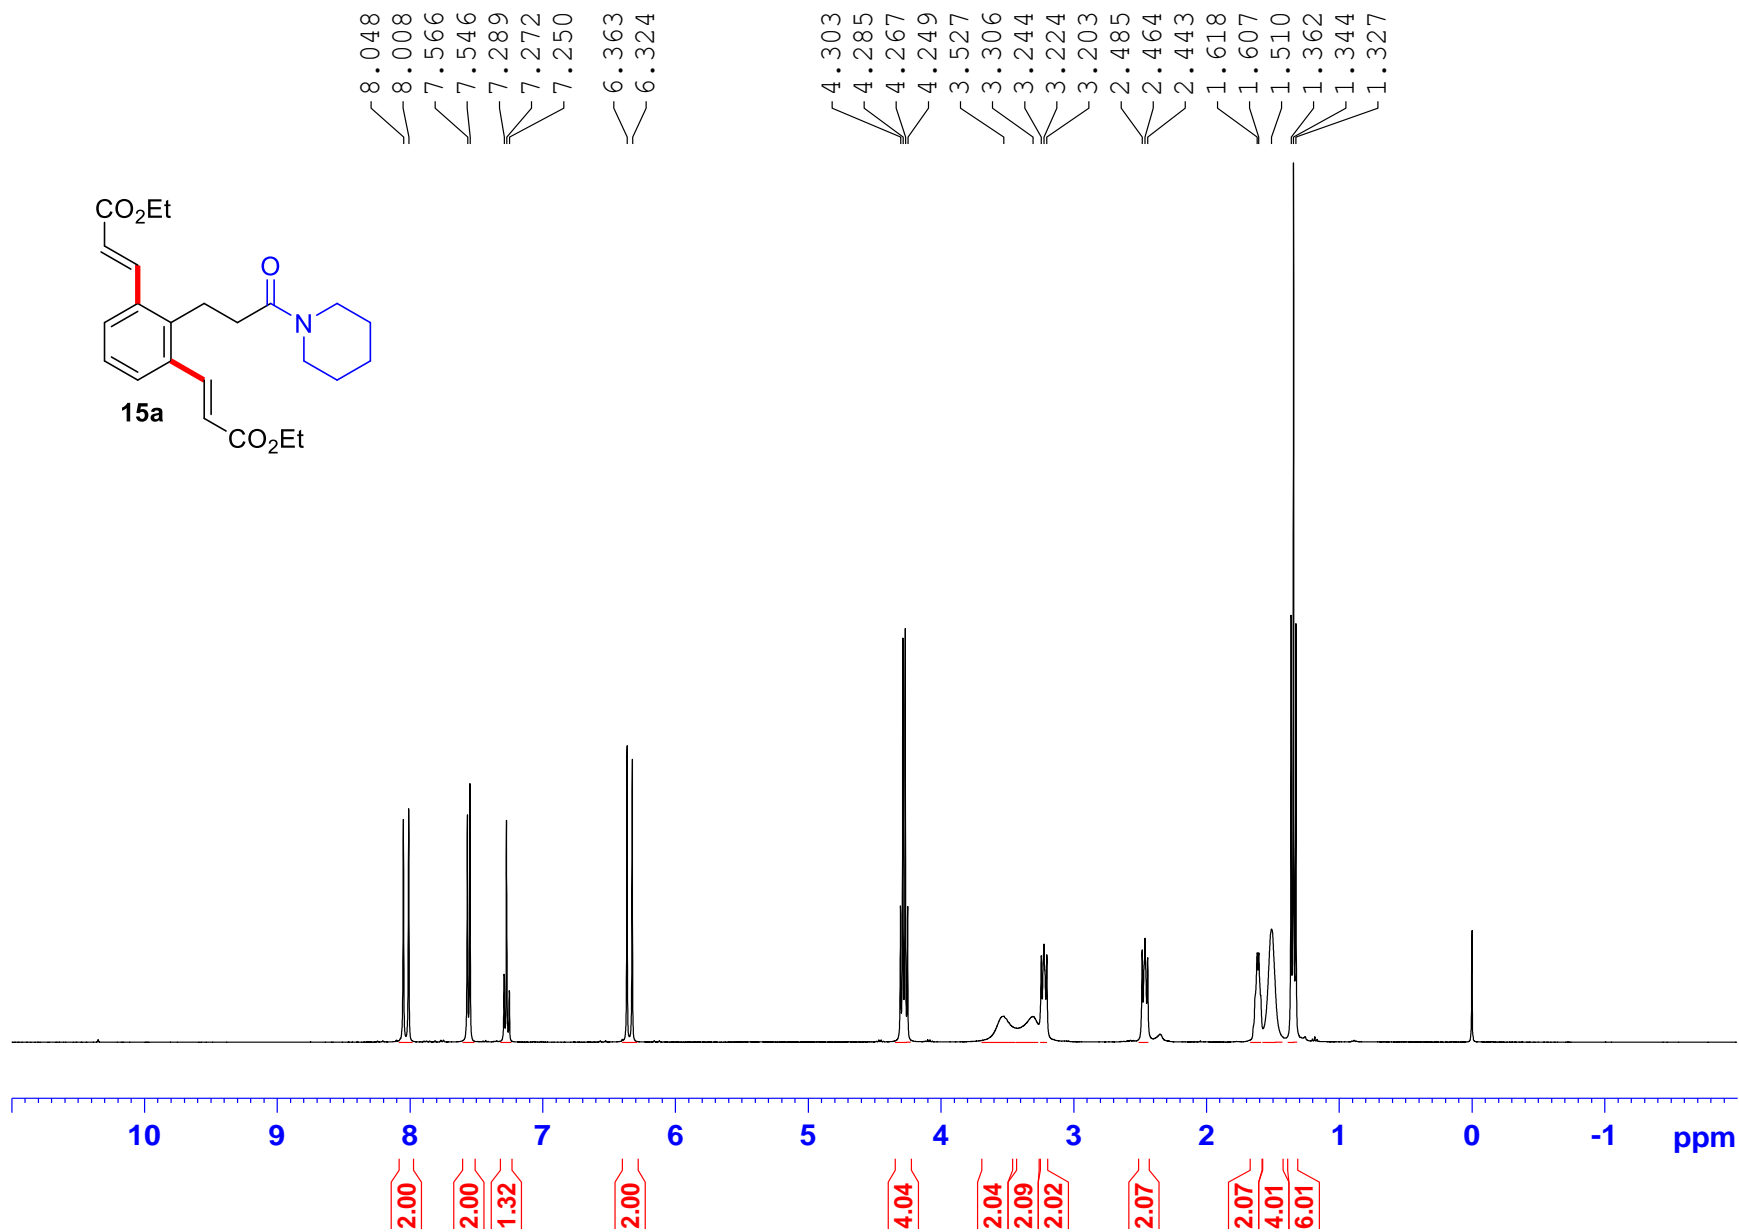



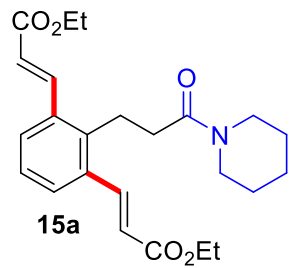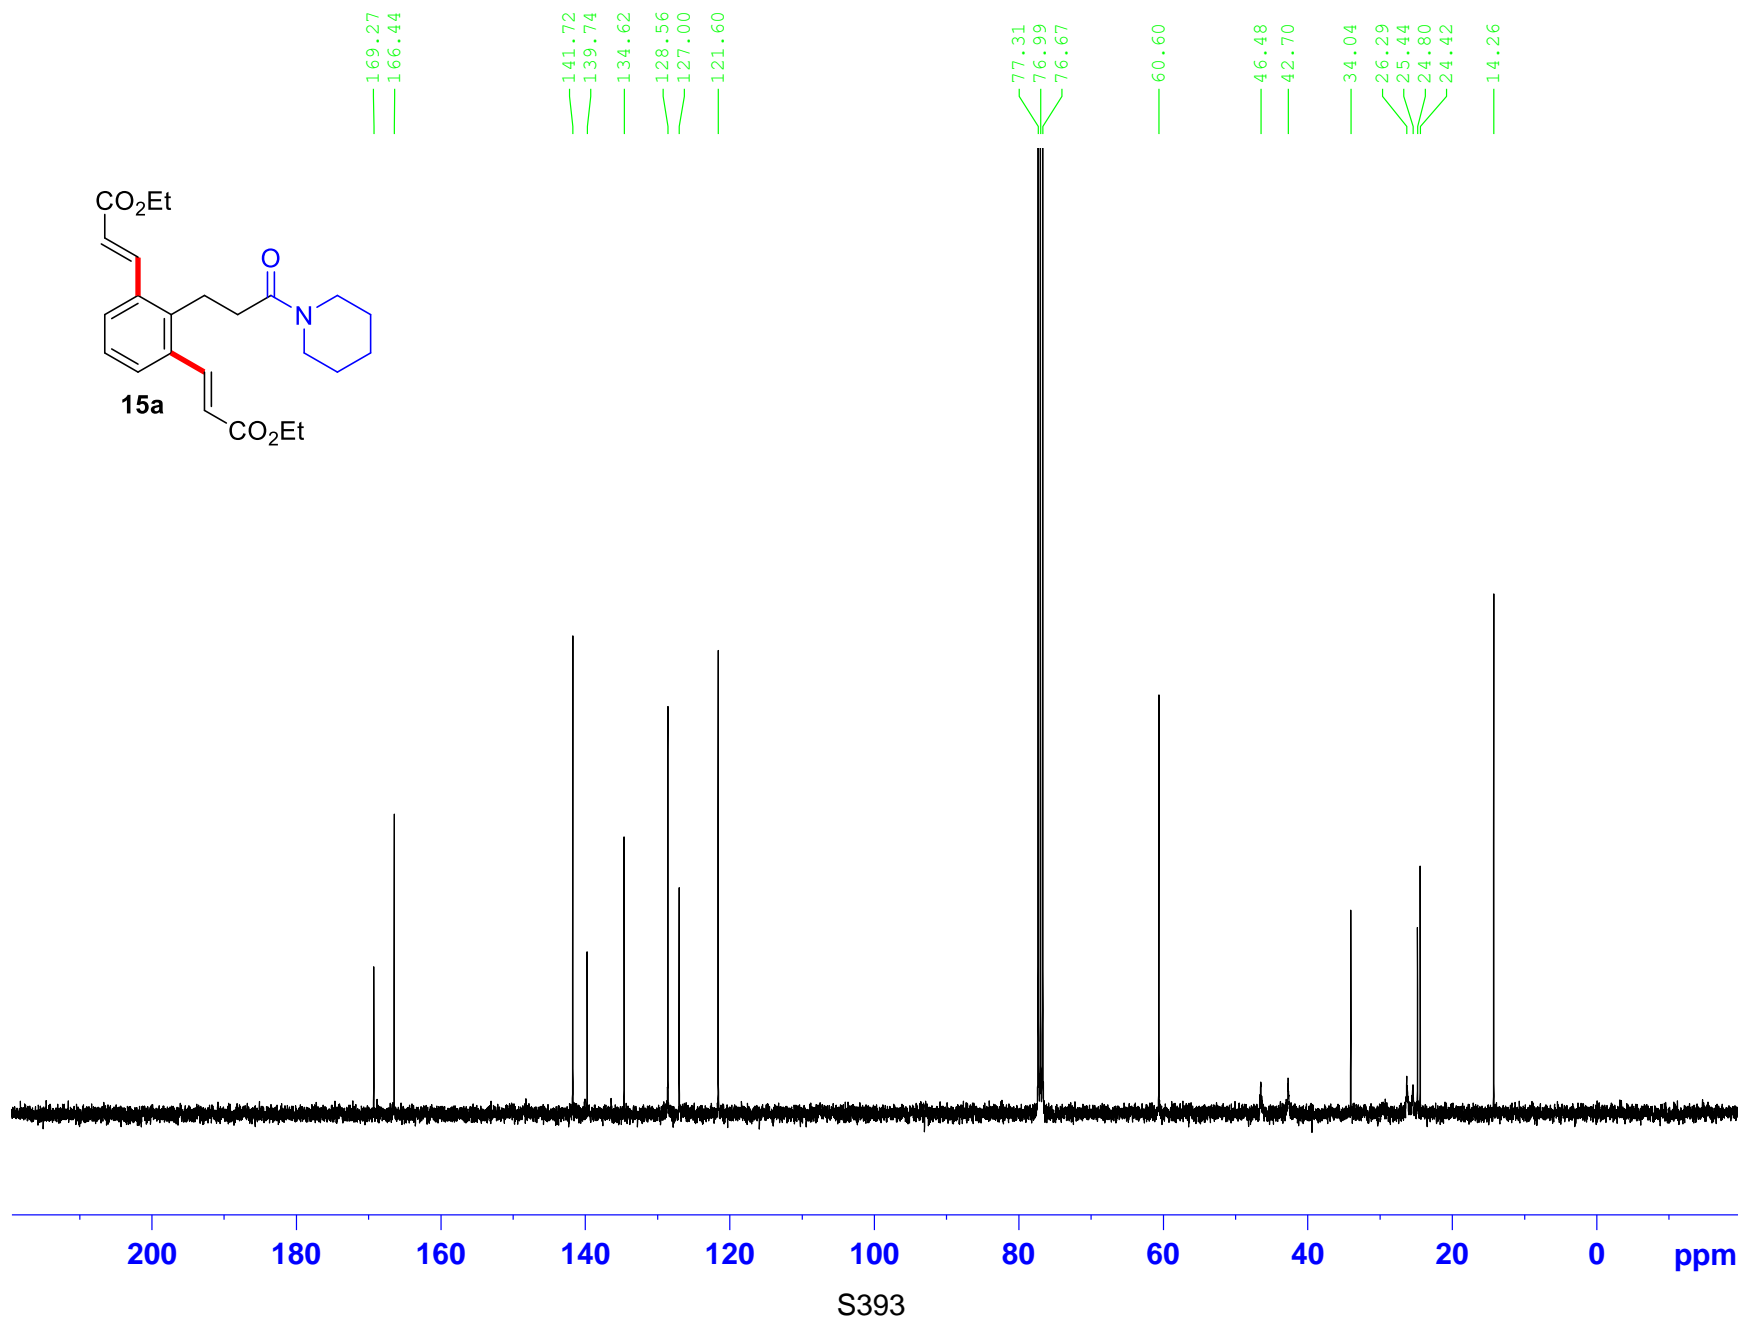

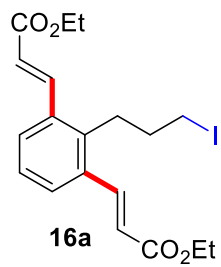

8.092  
 8.053  
 7.597  
 7.578  
 7.314  
 7.294  
 7.286  
 7.275  
 6.393  
 6.354

4.332  
 4.314  
 4.296  
 4.278  
 3.293  
 3.276  
 3.259  
 3.043  
 3.028  
 3.023  
 3.016  
 3.003  
 2.061  
 2.045  
 2.025  
 2.005  
 1.988  
 1.391  
 1.373  
 1.355

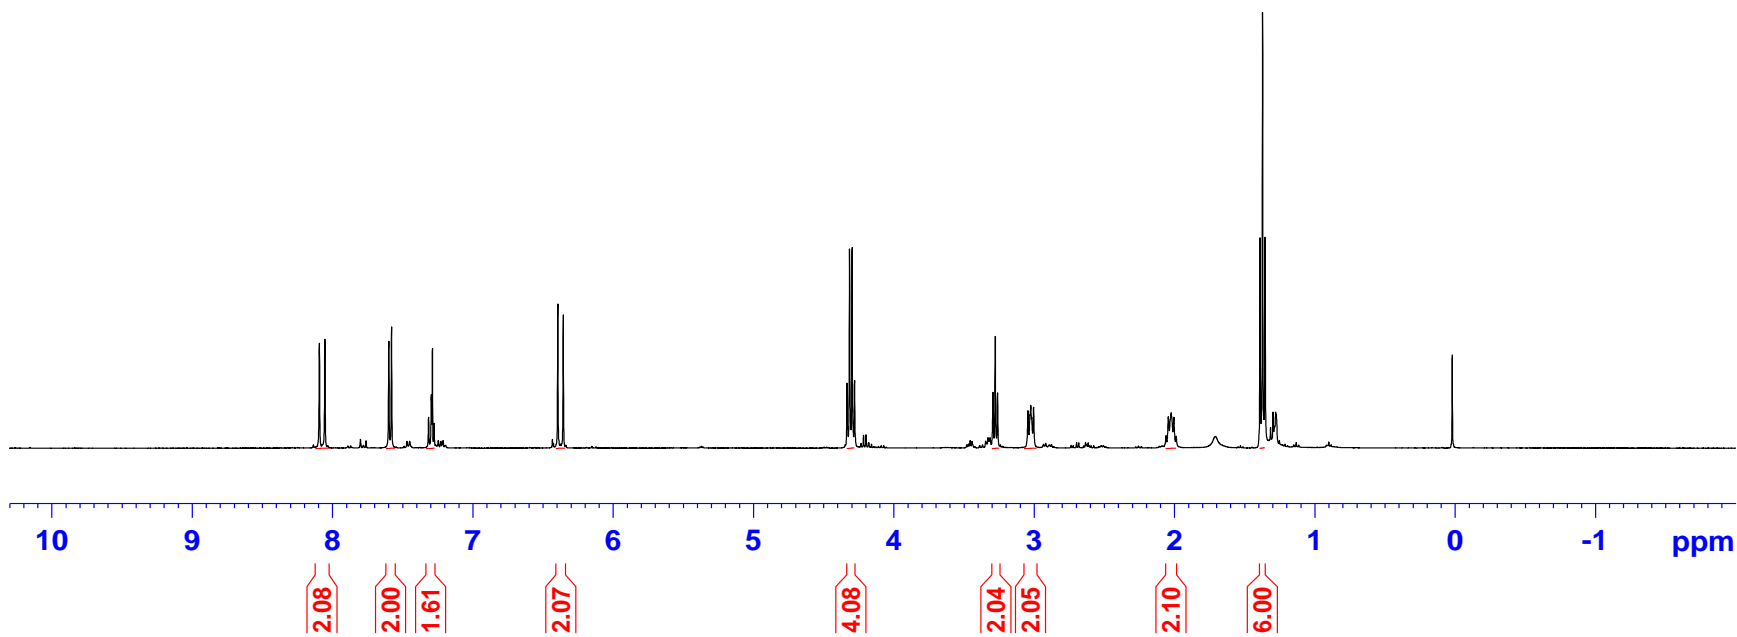

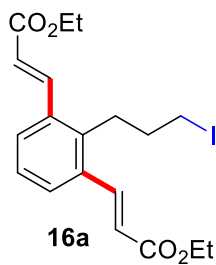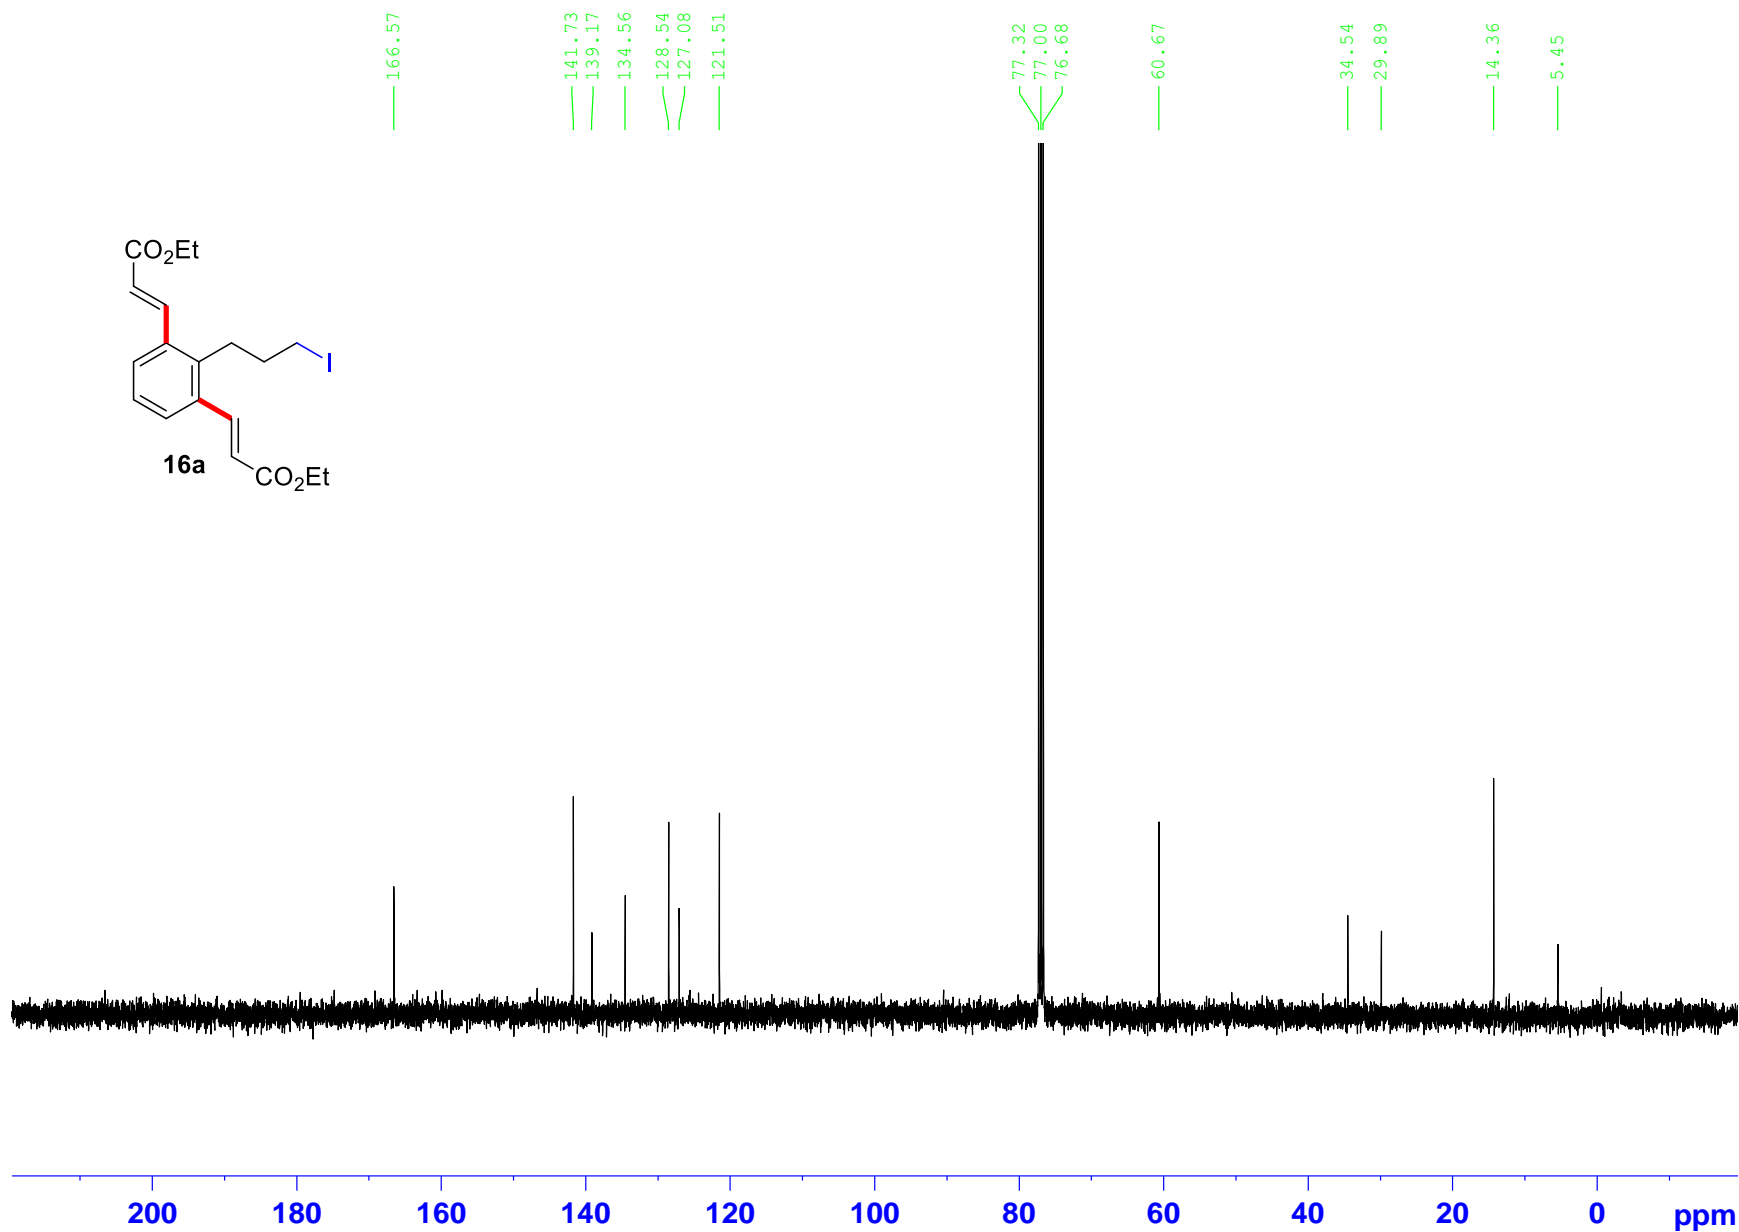

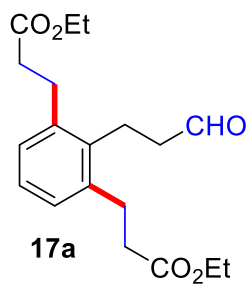

— 9.865

7.269  
 7.137  
 7.121  
 7.116  
 7.100  
 7.058  
 7.039

4.163  
 4.145  
 4.127  
 4.109  
 3.013  
 2.994  
 2.972  
 2.949  
 2.930  
 2.910  
 2.708  
 2.687  
 2.668  
 2.613  
 2.592  
 2.573  
 1.262  
 1.244  
 1.226

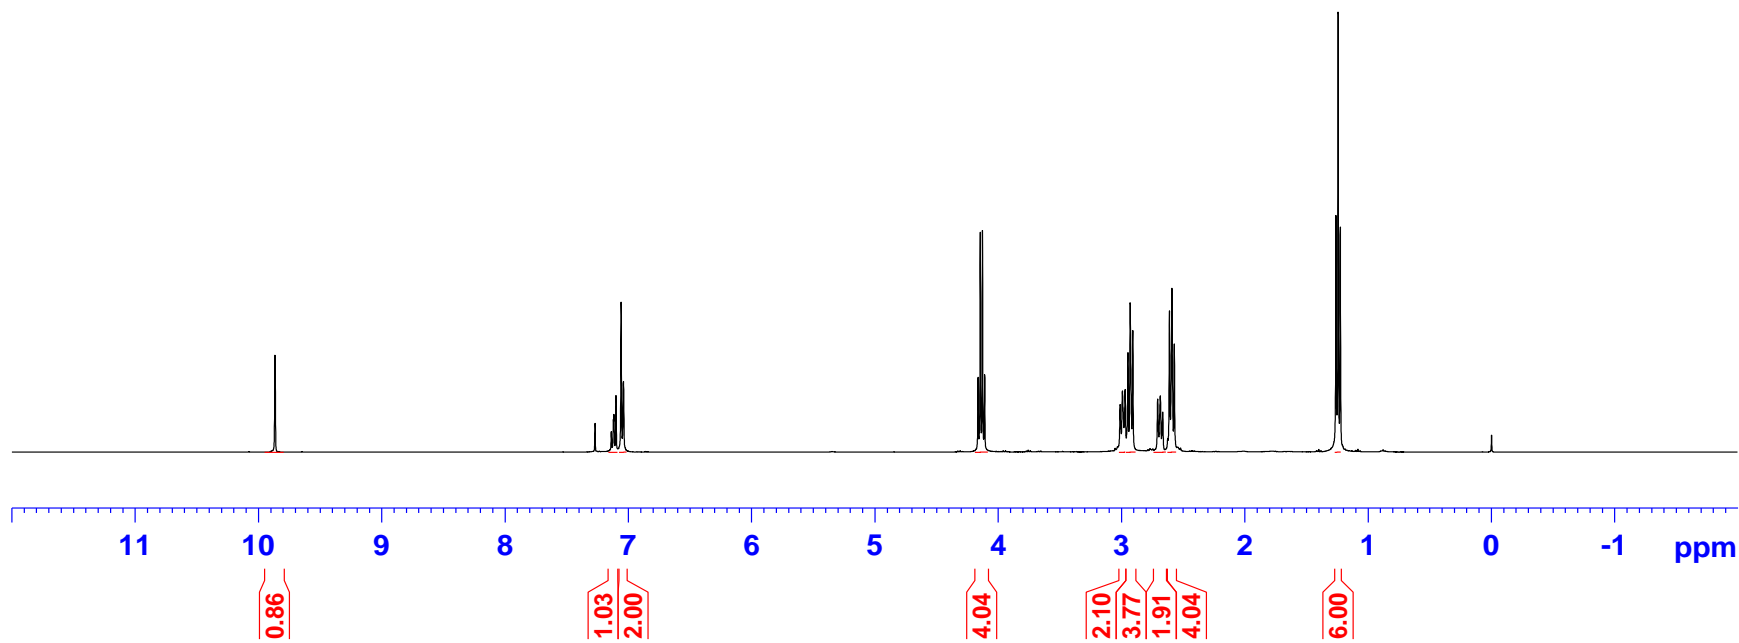

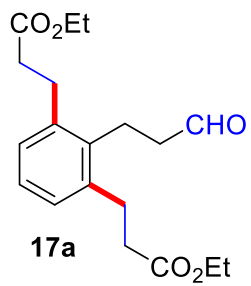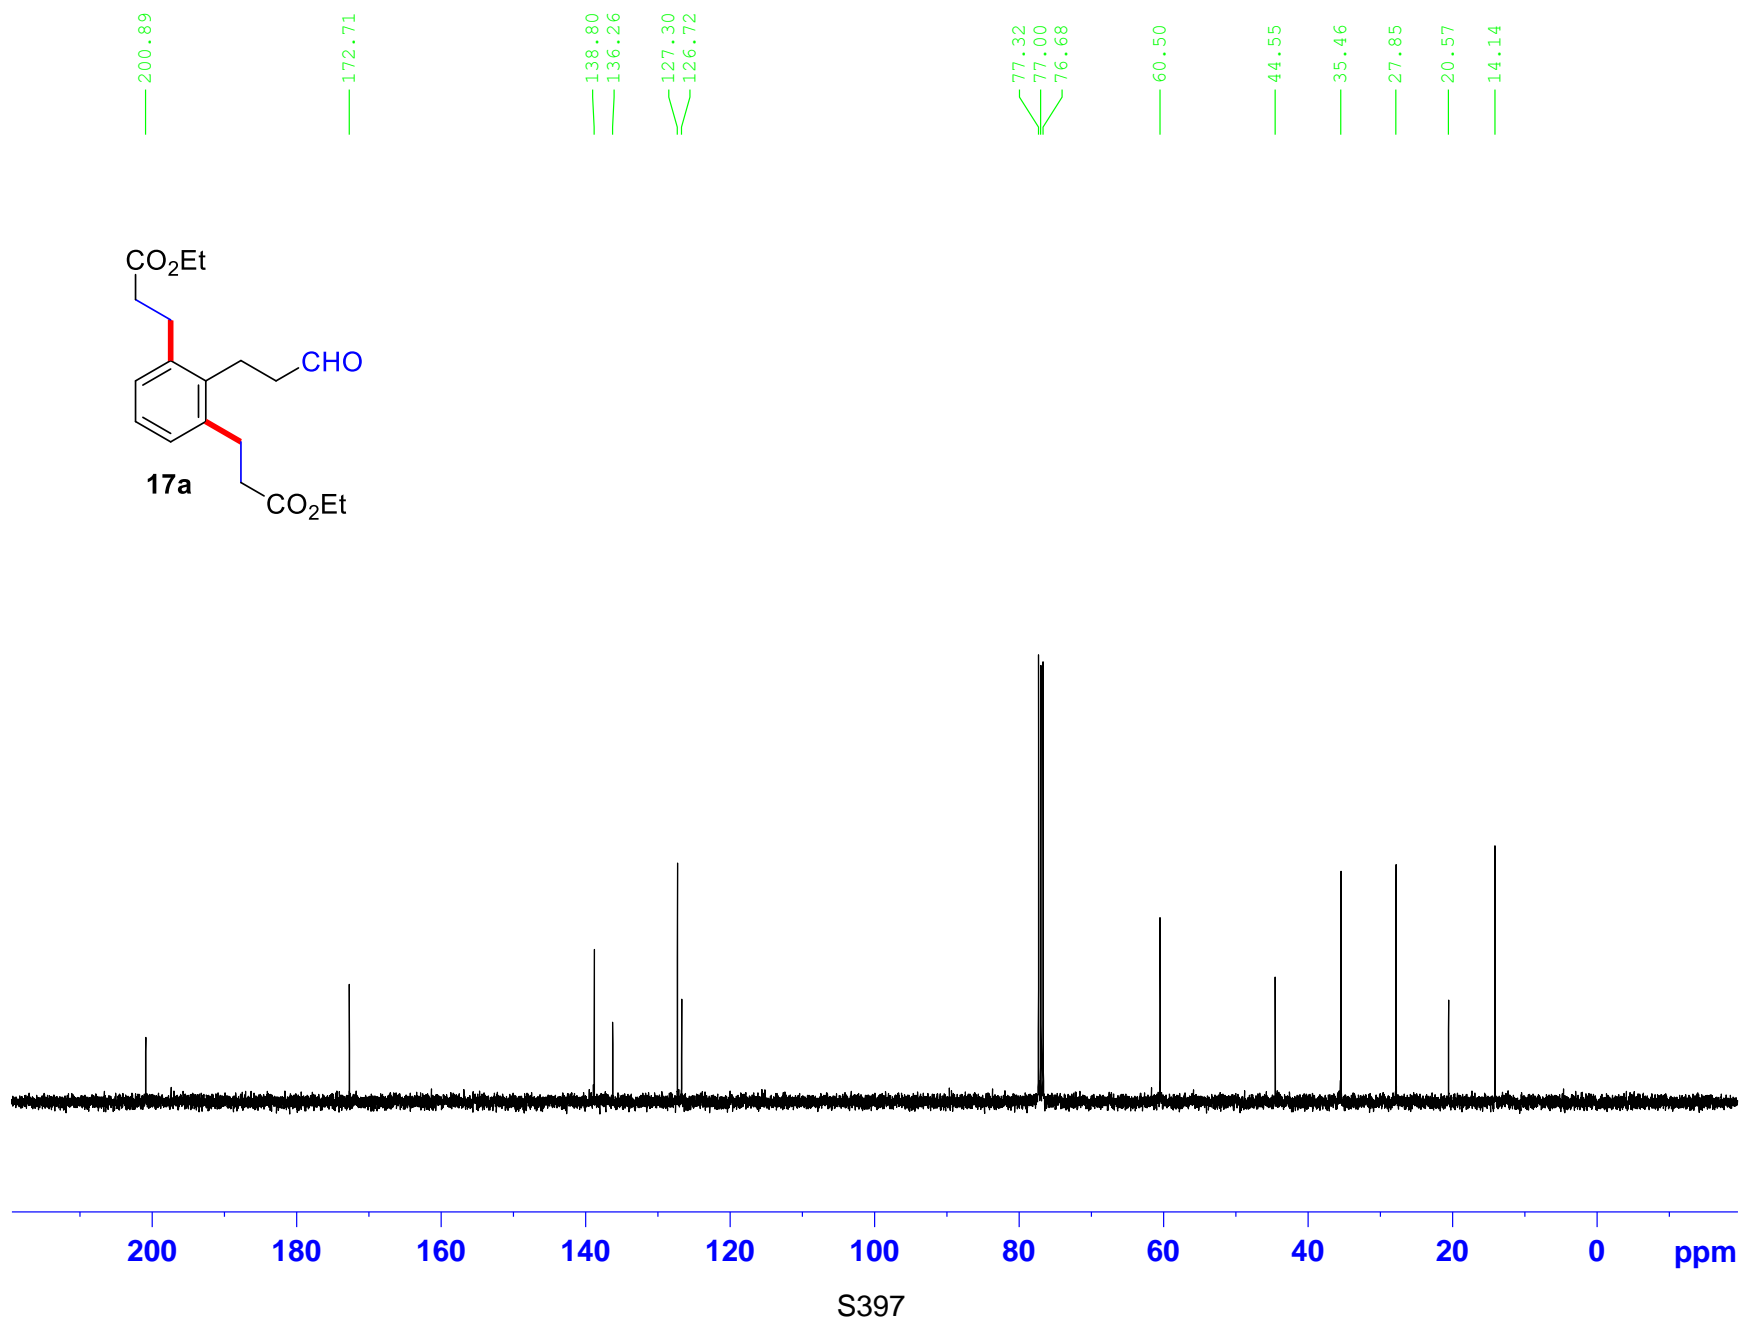

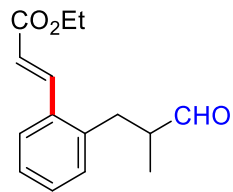

**3ae**

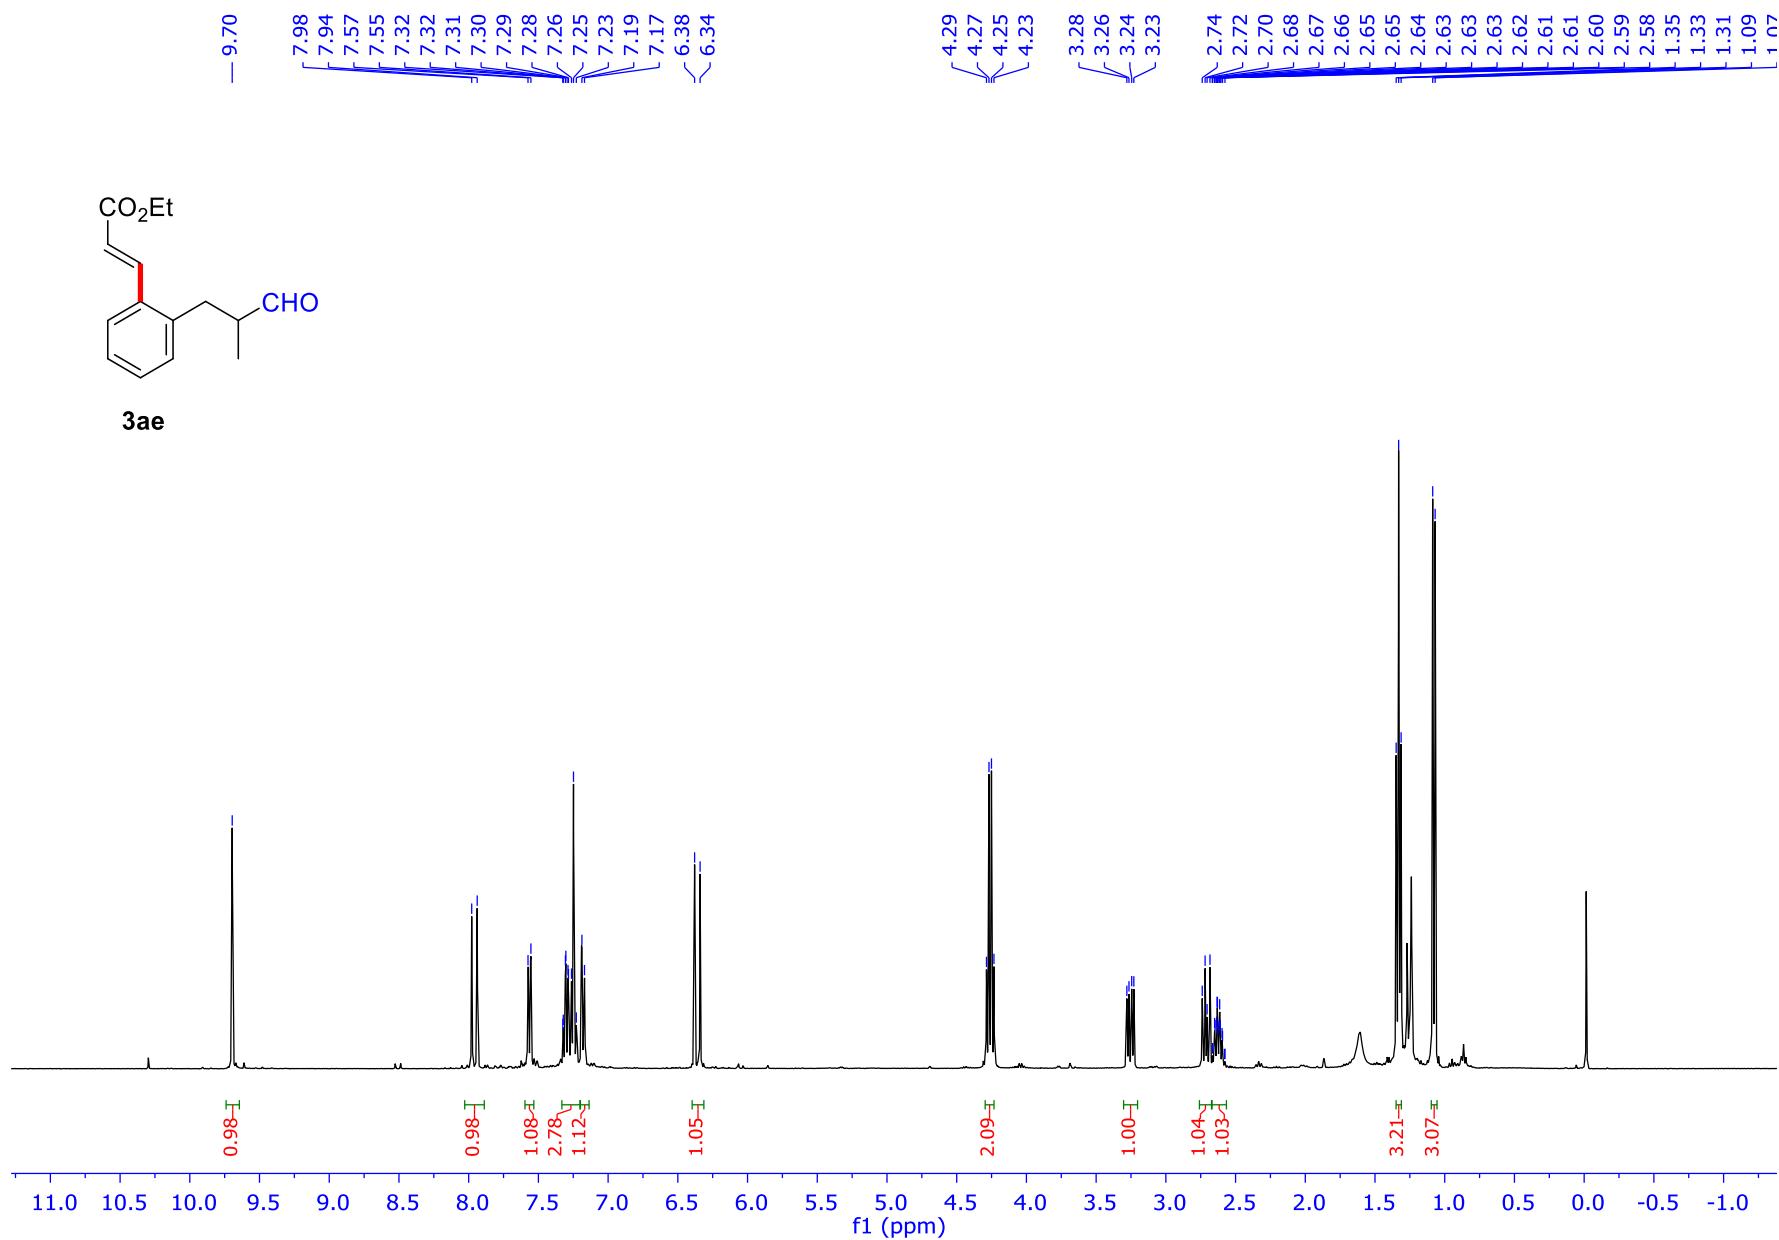

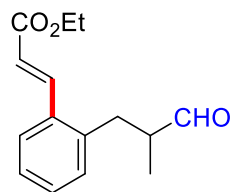

3ae

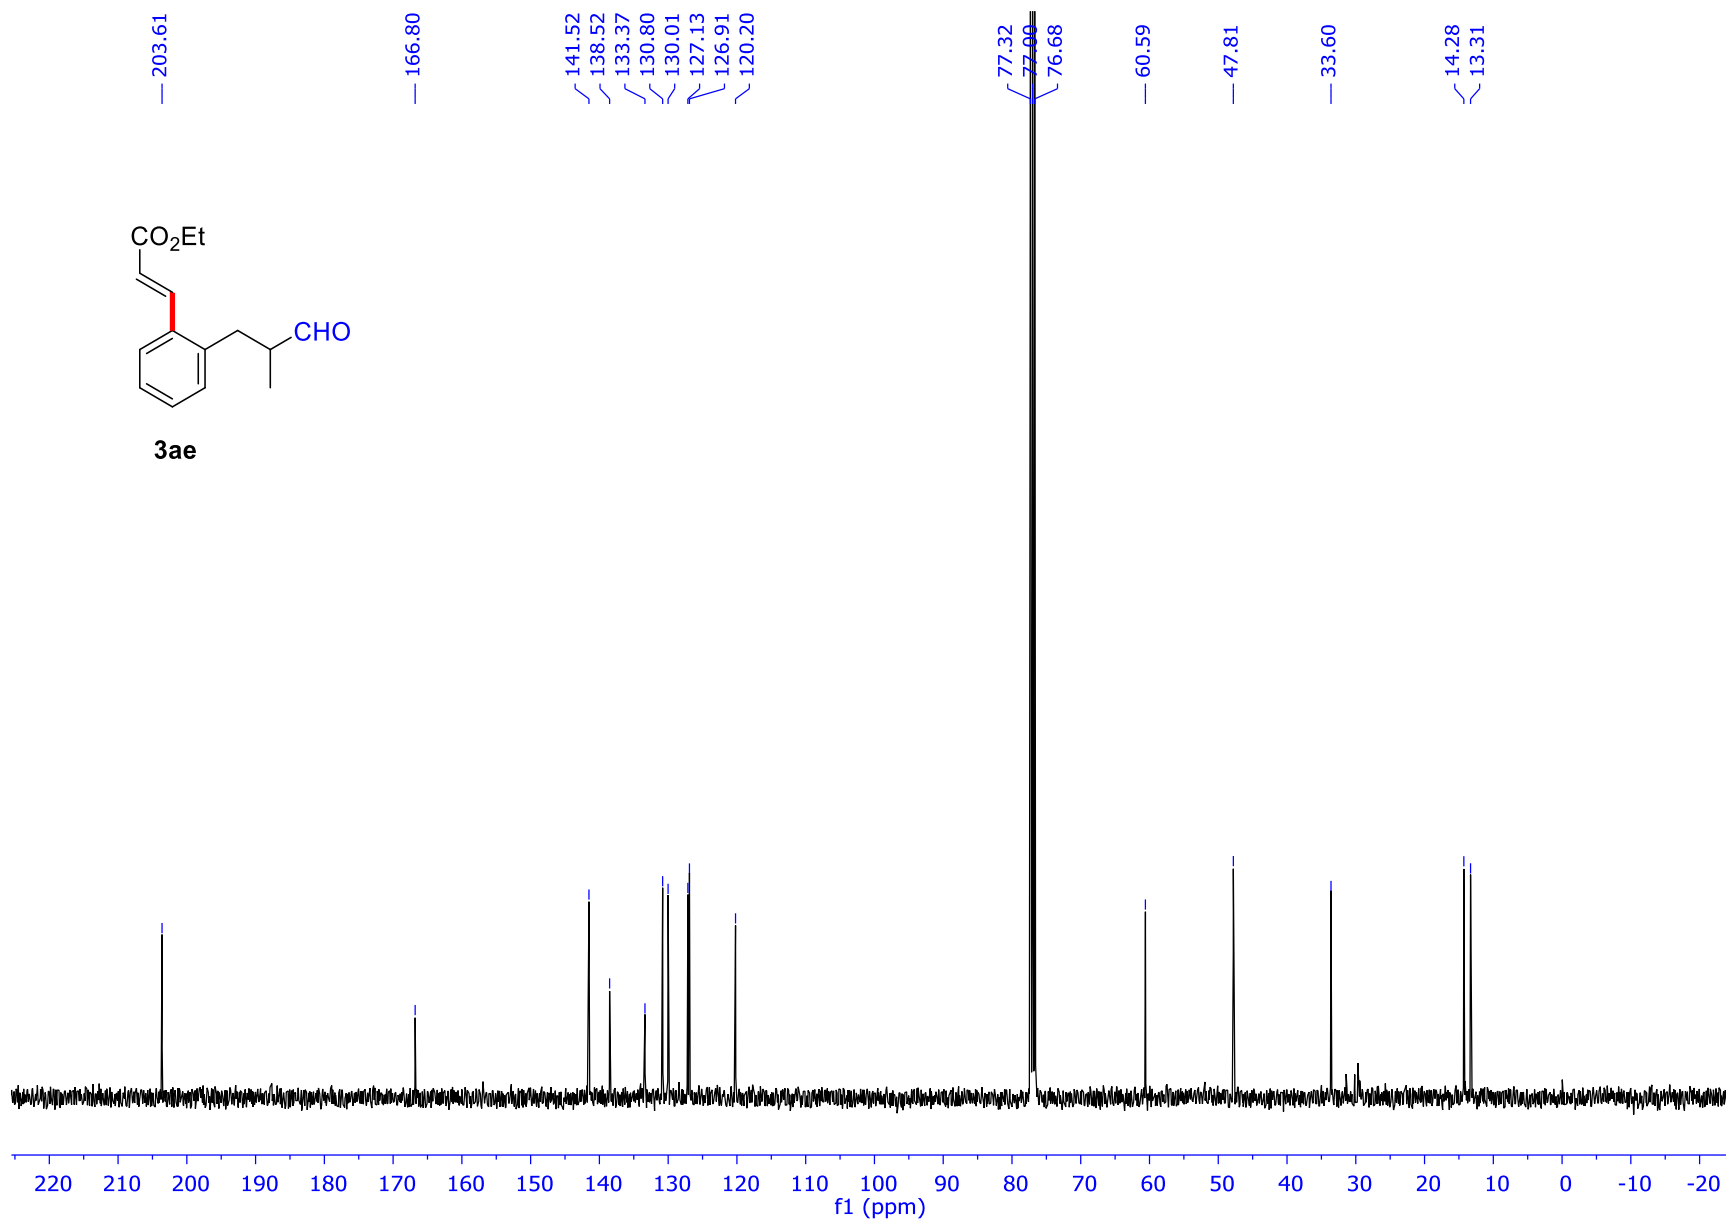

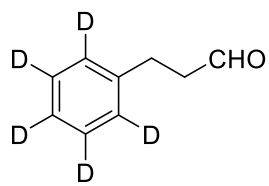

1a-D<sub>5</sub>

— 9.815

— 7.247

2.978  
2.959  
2.940  
2.798  
2.779  
2.759

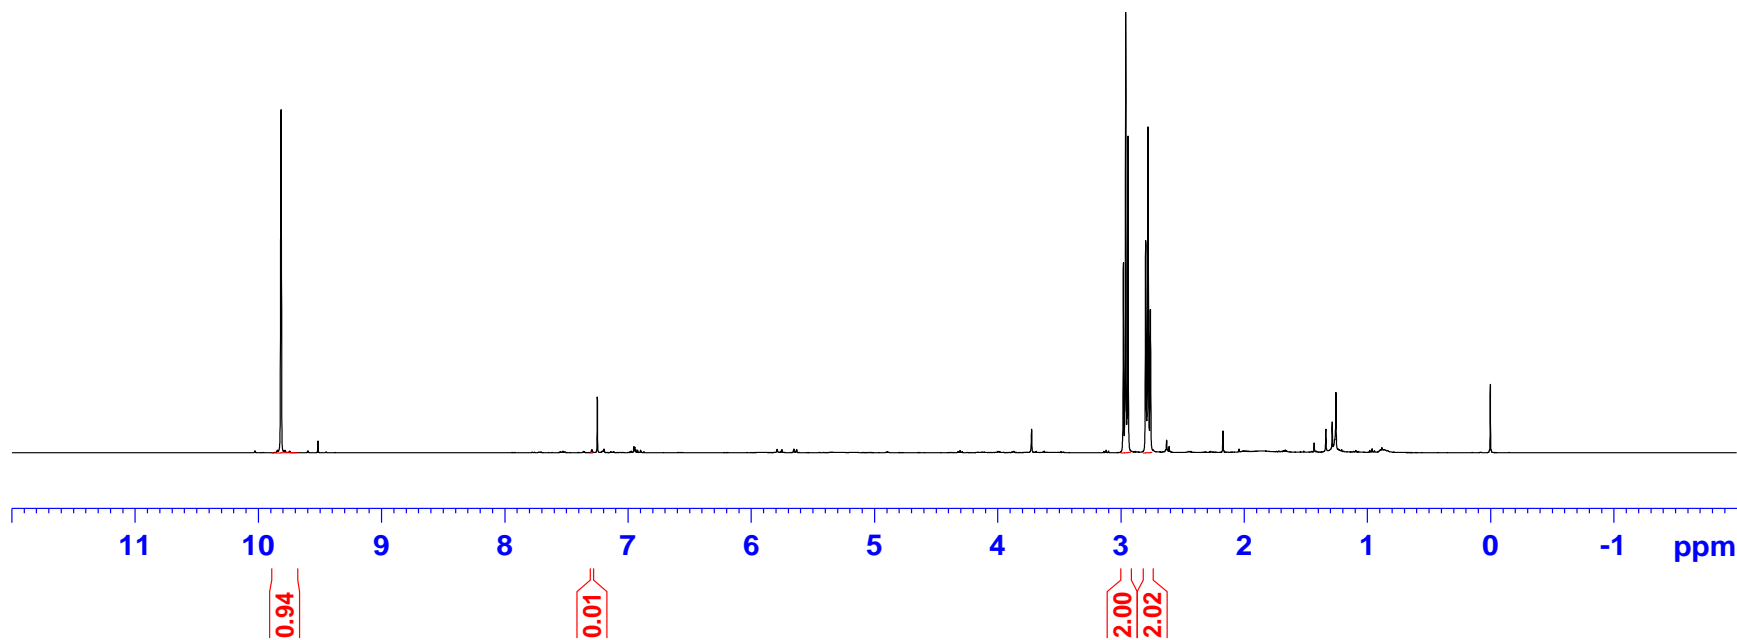



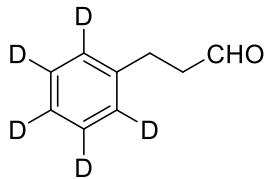

1a-D<sub>5</sub>

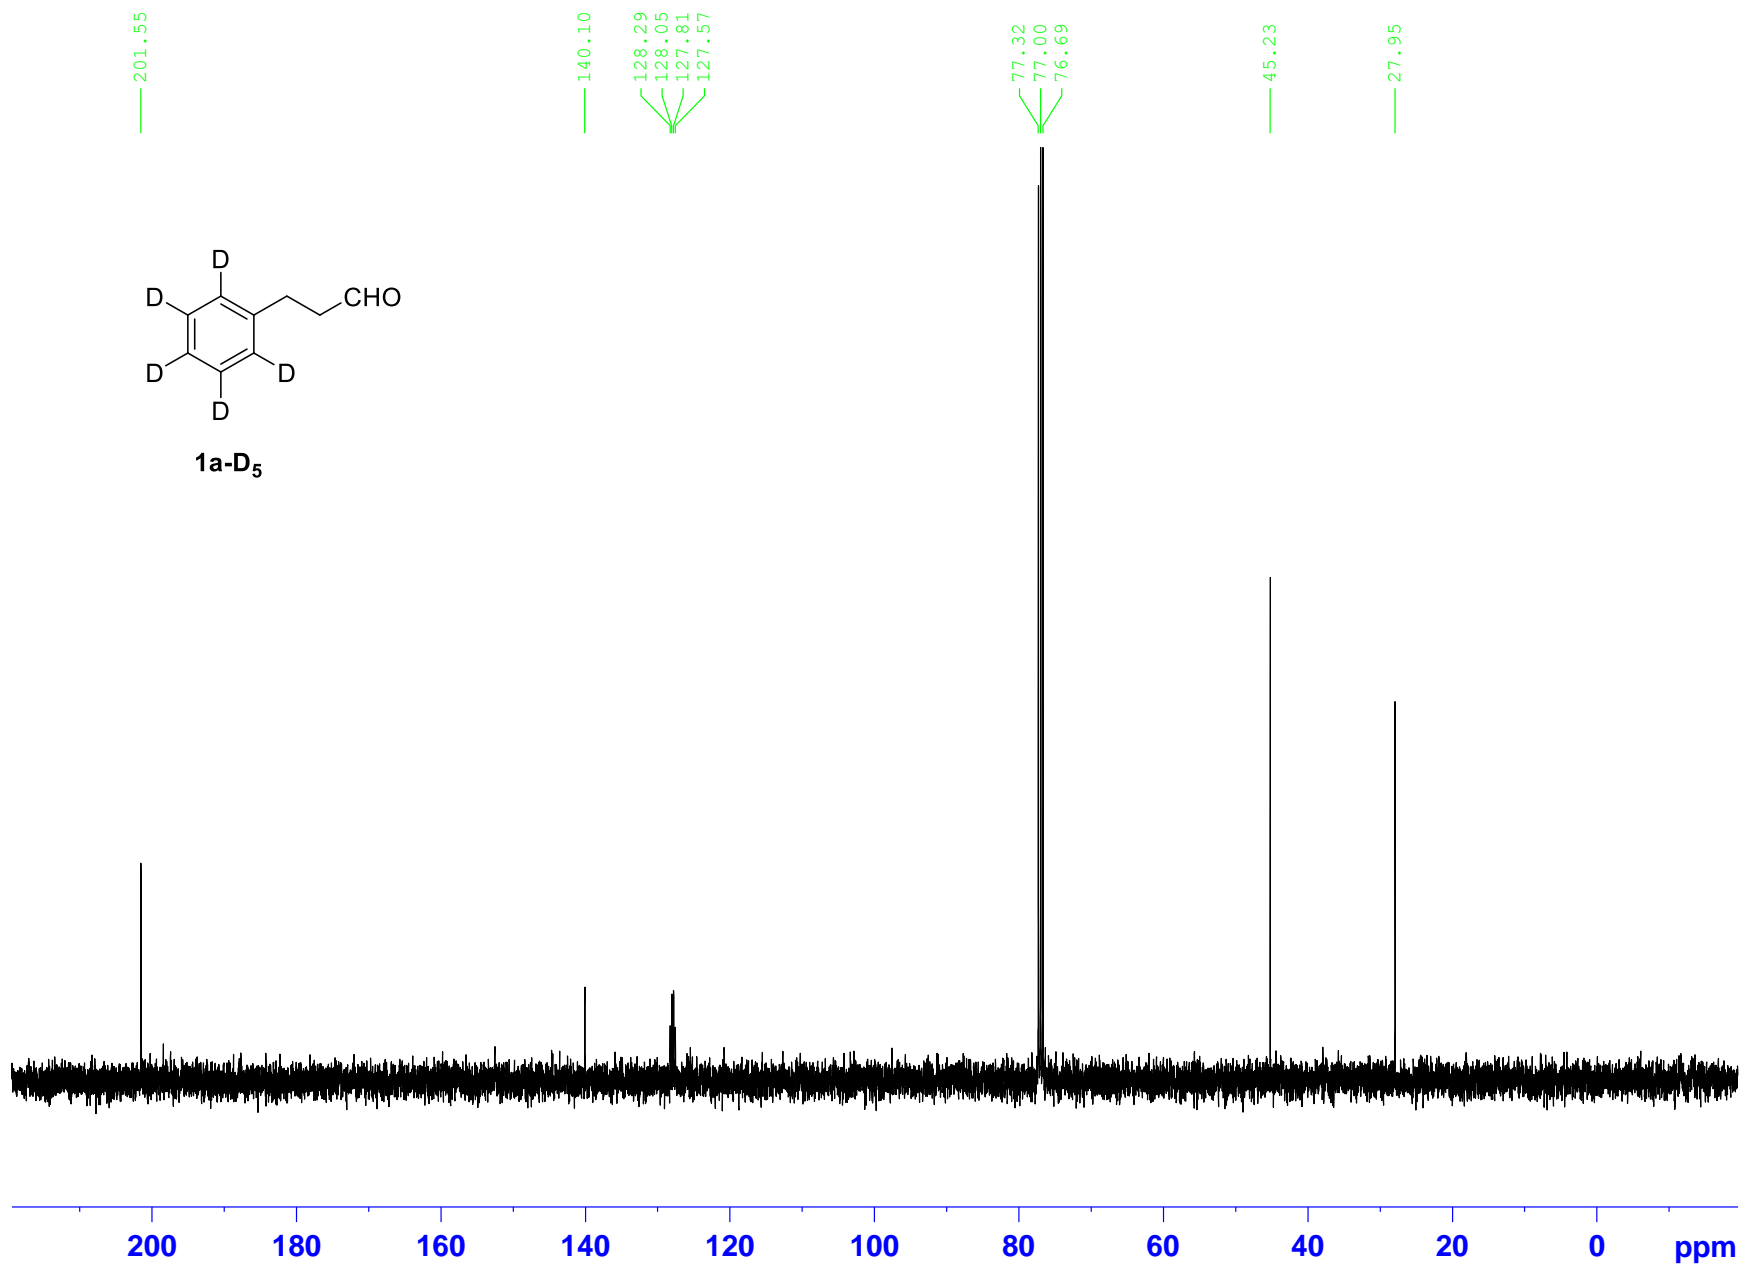

S401

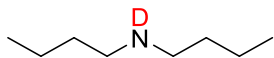

2.61  
2.61  
2.59  
2.59  
2.57  
2.57  
1.51  
1.51  
1.51  
1.49  
1.48  
1.48  
1.47  
1.47  
1.46  
1.46  
1.45  
1.45  
1.44  
1.39  
1.39  
0.94  
0.94  
0.92  
0.92  
0.90  
0.90

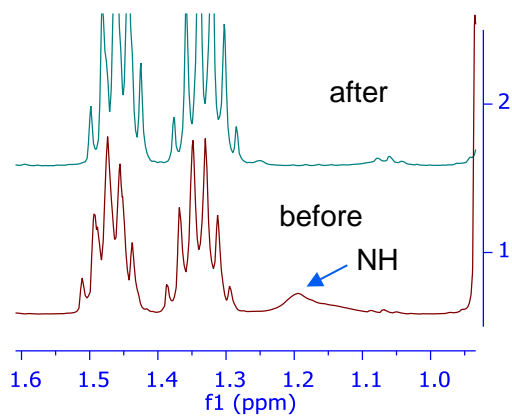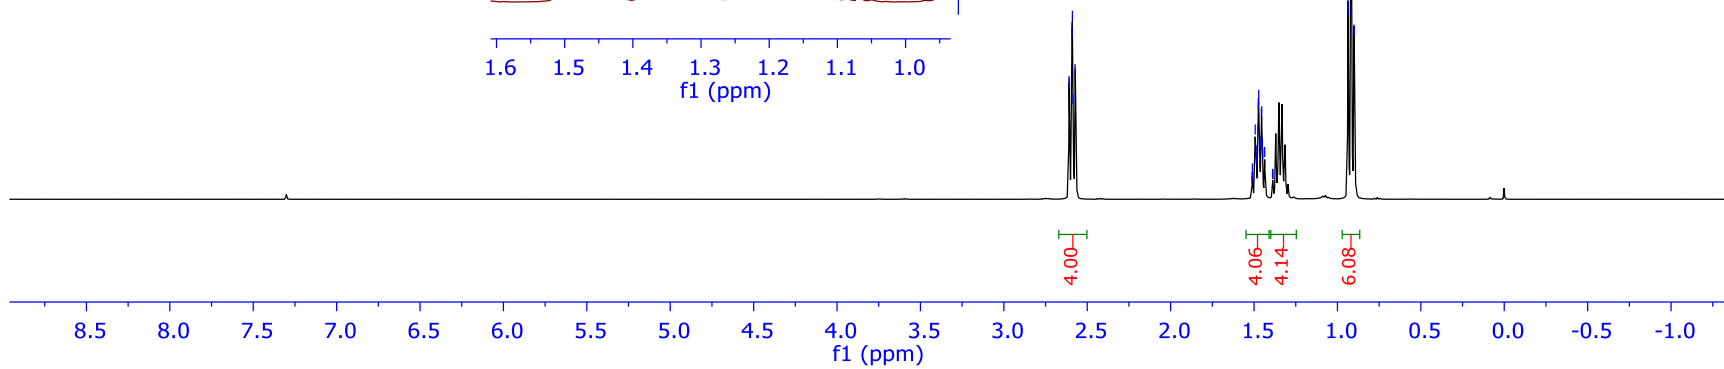

S402

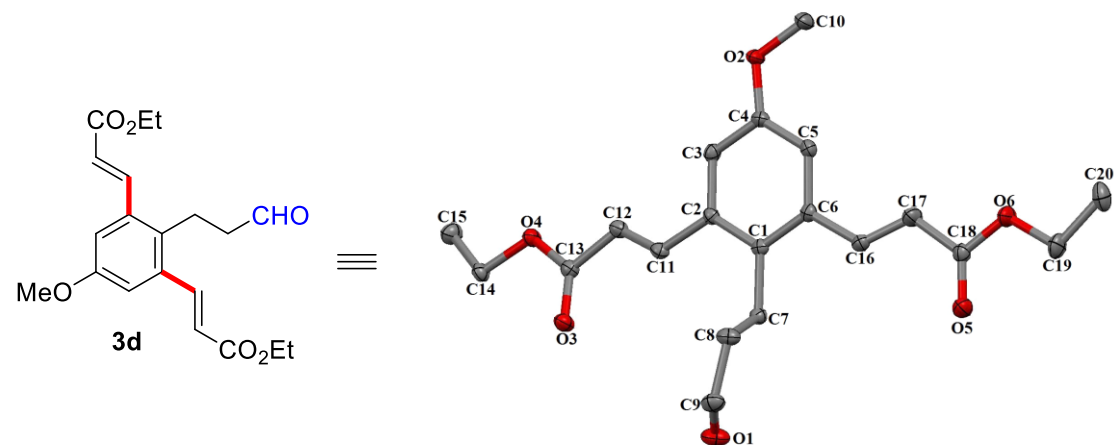

X-ray structure of compound **3d**. Hydrogen atoms have been omitted for clarity. The thermal ellipsoid was drawn at the 50% probability level. (CCDC 1964780)

**Table S1** Crystal data and structure refinement for compound **3d**

|                                   |                                                                                                               |
|-----------------------------------|---------------------------------------------------------------------------------------------------------------|
| Identification code               | Full                                                                                                          |
| Empirical formula                 | C <sub>20</sub> H <sub>24</sub> O <sub>6</sub>                                                                |
| Formula weight                    | 360.39                                                                                                        |
| Temperature                       | 100(2) K                                                                                                      |
| Wavelength                        | 0.71073 Å                                                                                                     |
| Crystal system                    | Monoclinic                                                                                                    |
| Space group                       | P2 <sub>1</sub> /c                                                                                            |
| Unit cell dimensions              | a = 21.9046(9) Å, $\alpha$ = 90°<br>b = 4.7807(2) Å, $\beta$ = 94.293(2)°<br>c = 17.8266(8) Å, $\gamma$ = 90° |
| Volume                            | 1861.55(14) Å <sup>3</sup>                                                                                    |
| Z                                 | 4                                                                                                             |
| Density (calculated)              | 1.286 Mg/m <sup>3</sup>                                                                                       |
| Absorption coefficient            | 0.095 mm <sup>-1</sup>                                                                                        |
| F(000)                            | 768                                                                                                           |
| Crystal size                      | 0.18 x 0.16 x 0.16 mm <sup>3</sup>                                                                            |
| Theta range for data collection   | 2.54 to 27.57°                                                                                                |
| Index ranges                      | -28 ≤ h ≤ 28, -6 ≤ k ≤ 6, -23 ≤ l ≤ 23                                                                        |
| Reflections collected             | 37246                                                                                                         |
| Independent reflections           | 4270 [R(int) = 0.1663]                                                                                        |
| Completeness to theta = 27.57°    | 99.4 %                                                                                                        |
| Absorption correction             | Semi-empirical from equivalents                                                                               |
| Max. and min. transmission        | 0.9850 and 0.9832                                                                                             |
| Refinement method                 | Full-matrix least-squares on F <sup>2</sup>                                                                   |
| Data / restraints / parameters    | 4270 / 0 / 236                                                                                                |
| Goodness-of-fit on F <sup>2</sup> | 1.028                                                                                                         |
| Final R indices [I > 2σ(I)]       | R1 = 0.0426, wR2 = 0.1036                                                                                     |
| R indices (all data)              | R1 = 0.0661, wR2 = 0.1100                                                                                     |
| Extinction coefficient            | 0.007(2)                                                                                                      |
| Largest diff. peak and hole       | 0.314 and -0.250 e. Å <sup>-3</sup>                                                                           |

## References:

1. a) Johns, B. A. *et al.* HIV integrase inhibitors. *Patent: US2015/225399 A1* (2015); b) Wu, F., Wang, L., Chen, J., Nicewicz, D. A., & Huang, Y. *Direct synthesis of polysubstituted aldehydes via visible-light catalysis.* *Angew. Chem. Int. Ed. Engl.* **57**, 2174–2178 (2018).
2. a) Jie, R., Xuelong, Y., Kun, H., Mengen, C. Synthesis method of pterostilbene. *Patent: CN108484374 A* (2018); b) Christensen, S. H., Olsen, E. P. K., Rosenbaum J., and Madsen, R. Hydroformylation of olefins and reductive carbonylation of aryl halides with syngas formed *ex situ* from dehydrogenative decarbonylation of hexane-1,6-diol. *Org. Biomol. Chem.* **13**, 938–945 (2015).
3. McCarthy, T. D., Naylor, A. Heterocyclic compounds and methods for their use. *Patent: WO2013/102242 A1* (2013).
4. Amatore, M., Gosmini, C. & Perichon, J. CoBr<sub>2</sub>(Bpy): An efficient catalyst for the direct conjugate addition of aryl halides or triflates onto activated olefins. *J. Org. Chem.* **71**, 6130-6134 (2006).
5. a) Weigel, W. K., 3rd, Dennis, T. N., Kang, A. S., Perry, J. J. P. & Martin, D. B. C. A Heck-based strategy to generate anacardic acids and related phenolic lipids for isoform-specific bioactivity profiling. *Org. Lett.* **20**, 6234-6238 (2018), b) Brito, G. A., Jung, W.-Ok., Yoo, M., and Krische, M. J. Enantioselective iridium-catalyzed allylation of acetylenic ketones via 2-propanol-mediated reductive coupling of allyl acetate: C14-C23 of pladienolide D. *Angew. Chem. Int. Ed.* **58**, 18803-18807 (2019).
6. a) Bode, J. W., Doyle, M. P., Protopopova, M. N., & Zhou, Q.-L. Intramolecular regioselective insertion into unactivated prochiral carbon-hydrogen bonds with diazoacetates of primary alcohols catalyzed by chiral dirhodium(II) carboxamidates. Highly enantioselective total synthesis of natural lignan lactones. *J. Org. Chem.* **61**, 9146-9155 (1996), b) Mahto, P., Rana, N. K., Shukla, K., Das, B. G., Joshi, H., and Singh V. K. Asymmetric multifunctional modular organocatalysis: One-pot direct strategy to enantiopure  $\alpha,\beta$ -disubstituted  $\gamma$ -butyrolactones. *Org. Lett.* **21**, 5962–5966 (2019).
7. Angelo M. *et al.* Carbamate derivatives of lactam-based N-acylethanolamine acid amidase (NAAA) inhibitors. *Patent: WO2014/144836 A2* (2014).
8. Li, J., Qu, S. & Zhao W. Rhodium-catalyzed remote C(sp<sup>3</sup>)-H borylation of silyl enol ethers. *Angew. Chem. Int. Ed. Engl.* **59**, 2360-2364 (2020).
9. Bouquillon, S., Ganchegui, B., Estrine, Boris., Henin, F. & Muzart, Jacques. Heck arylation of allylic alcohols in molten salts. *J. Organomet. Chem.* **634**, 153–156 (2001).

10. Chanthamath, S., Takaki, S., Shibatomi, K. & Iwasa, S. Highly stereoselective cyclopropanation of alpha,beta-unsaturated carbonyl compounds with methyl (diazoacetoxy)acetate catalyzed by a chiral ruthenium(II) complex. *Angew. Chem., Int. Ed.* **52**, 5818-5821 (2013).
11. Rai, P., Maji, K. & Maji, B. Photoredox/cobalt dual catalysis for visible-light-mediated alkene-alkyne coupling. *Org. Lett.* **21**, 3755-3759 (2019).
12. Maity, S., Agasti, S., Earsad, A. M., Hazra, A. & Maiti, D. Nickel-catalyzed insertion of alkynes and electron-deficient olefins into unactivated sp<sup>3</sup> C-H bonds. *Chem. Eur. J.* **21**, 11320-11324 (2015).
13. Furuya, T.; Strom, A. E. & Ritter, T. Silver-mediated fluorination of functionalized aryl stannanes. *J. Am. Chem. Soc.* **131**, 1662-1663 (2009).
14. Boddy, A. J.; Affron, D. P.; Cordier, C. J.; Rivers, E. L.; Spivey, A. C. & Bull, J. A. Rapid assembly of saturated nitrogen heterocycles in one-pot: Diazo-heterocycle "Stitching" by N-H insertion and cyclization. *Angew. Chem. Int. Ed. Engl.* **58**, 1458-1462 (2019).
15. Tang, P.; Furuya, T. & Ritter, T. Silver-catalyzed late-stage fluorination. *J. Am. Chem. Soc.* **132**, 12150-12154 (2010).
16. Qu, X.; Li, T.; Zhu, Y.; Sun, P.; Yang, H. & Mao, J. Ligand-free highly effective iron/copper co-catalyzed formation of dimeric aryl ethers or sulfides. *Org. Biomol. Chem.* **9**, 5043-5046 (2011).
17. a) Kaplaneris, N.; Rogge, T.; Yin, R.; Wang, H.; Sirvinskaite, G. & Ackermann, L. Late-stage diversification through manganese-catalyzed C-H activation: Access to acyclic, hybrid, and stapled peptides. *Angew. Chem. Int. Ed. Engl.* **58**, 3476-3480 (2019); b) Gandeepan, P. & Cheng, C. H. Allylic carbon-carbon double bond directed Pd-catalyzed oxidative ortho-olefination of arenes. *J. Am. Chem. Soc.* **134**, 5738-5741 (2012).
18. Jiang, X.; Zhang, J. & Ma, S. Iron catalysis for room-temperature aerobic oxidation of alcohols to carboxylic acids. *J. Am. Chem. Soc.* **138**, 8344-8347 (2016).
19. Smith, S. M. & Takacs, J. M. Amide-directed catalytic asymmetric hydroboration of trisubstituted alkenes. *J. Am. Chem. Soc.* **132**, 1740-1741 (2010).
20. Gandeepan, P. & Cheng, C. H. Allylic carbon-carbon double bond directed Pd-catalyzed oxidative *ortho*-olefination of arenes. *J. Am. Chem. Soc.* **134**, 5738-5741 (2012).

21. Schreib, B. S. & Carreira, E. M. Palladium-catalyzed regioselective C-H iodination of unactivated alkenes. *J. Am. Chem. Soc.* **141**, 8758-8763, (2019).
22. Zhu, J. *et al.* A direct dmine-palladium acetate cocatalyzed saegusa oxidation reaction of unmodified aldehydes to  $\alpha,\beta$ -unsaturated aldehydes. *Adv. Synth. Catal.* **351**, 1229-1232, (2009).
23. Wang, M.-M. *et al.* Dehydrogenative synthesis of linear  $\alpha,\beta$ -unsaturated aldehydes with oxygen at room temperature enabled by <sup>t</sup>BuONO. *ACS Catal.* **7**, 4000-4003 (2017).
24. 24. a) Colomer, I., Chamberlain, A. E. R., Haughey, M. B. & Donohoe, T. J. Hexafluoroisopropanol as a highly versatile solvent. *Nat. Rev. Chem.* **1**, 0088 (2017). b) Sinha, S. K., Bhattacharya, T. and Maiti, D. Role of hexafluoroisopropanol in C–H activation. *React. Chem. Eng.* **4**, 244-253 (2019).
25. 25. Colomer, I. Hydroarylation of alkenes using anilines in hexafluoroisopropanol, *ACS Catal.* **10**, 6023-6029 (2020).
26. 26. Zhang, Y.; Xie, S.; Yan, M. and Ramstrom, O. Dynamic covalent chemistry of aldehyde enamines: Bi<sup>III</sup> - and Sc<sup>III</sup> -catalysis of amine-enamine exchange. *Chem. Eur. J.* **23**, 11908-11912 (2017)
